# Supplementary material for: High-Throughput Short Sequence Typing Schemes for Pseudomonas aeruginosa and Stenotrophomonas maltophilia Pure Culture and Environmental DNA
Source: Microorganisms. 2023 Dec 27;12(1):48. doi: 10.3390/microorganisms12010048 (PMC10819370; doi:10.3390/microorganisms12010048)
Supplement: Supplementary file 1 [file microorganisms-12-00048-s001.zip]

Archive with 6 entries (6 files):
- Bourdin et al, 2023 - Supplemental Figures_HiSST_Schemes_St+Pa.pdf
- TableS1_Reference strains used for HiSST schemes validation.xlsx
- TableS2.A_Pseudomonas_DataBase HiSST.xlsx
- TableS2.B_Stenotrophomonas_DataBase HiSST.xlsx
- TableS3_Loci Identity Matrix Score.xlsx
- TableS4_SNP Matrix.xlsx
