# Supplementary material for: High-Throughput Short Sequence Typing Schemes for Pseudomonas aeruginosa and Stenotrophomonas maltophilia Pure Culture and Environmental DNA
Source: Microorganisms. 2023 Dec 27;12(1):48. doi: 10.3390/microorganisms12010048 (PMC10819370; doi:10.3390/microorganisms12010048)
Supplement: Supplementary file 1 [file microorganisms-12-00048-s001.zip › TableS1_Reference strains used for HiSST schemes validation.xlsx]

## Sheet: Sheet1
Table S1: Reference strains used as positive or negative controls for laboratory validation of primers used in HiSST schemes for Pseudomonas aeruginosa and Stenotrophomonas maltophilia.
HiSST scheme	Tested species	Strains (additional designation)	Lab collection #	Isolation origin (country)	Provided by
P. aeruginosa / S. maltophilia	P. aeruginosa	UCBPP-PA14	ED1	Human clinical specimen (USA)	Daniel G Lee et al., 2006
P. aeruginosa		PAO1	ED956	Human, wound (Australia)	Sylvie Chevalier, University of Rouen-Normandie, Rouen, France.
P. aeruginosa		FKS4A	ED129	Human, cystic fibrosis (USA)	Luke Hoffman, Seattle Children's, Seattle, WA, USA.
P. aeruginosa		FKS7m	ED132	Human, Isolat sputum Seattle’s children hospital (USA)	Laboratory strain (Eric Déziel collection)
P. aeruginosa		HSJ2	ED133	Human, Isolat sputum Seattle’s children hospital (USA)	Laboratory strain (Eric Déziel collection)
P. aeruginosa		57SJ	ED540	Environmental, from an oil refinery waste-laden sandpit (Canada)	Deziel E, Paquette G, Villemur R, Lepine F, Bisaillon J. Biosurfactant production by a soil pseudomonas strain growing on polycyclic aromatic hydrocarbons. Appl Environ Microbiol. 1996 Jun;62(6):1908-12. doi: 10.1128/aem.62.6.1908-1912.1996. PMID: 16535330; PMCID: PMC1388868.
P. aeruginosa		LESB58	ED639	Human, Liverpool Epidemic strain (England)	Cheng K, Smyth RL, Govan JR, Doherty C, Winstanley C, Denning N, Heaf DP, van Saene H, Hart CA. Spread of beta-lactam-resistant Pseudomonas aeruginosa in a cystic fibrosis clinic. Lancet. 1996 Sep 7;348(9028):639-42. doi: 10.1016/S0140-6736(96)05169-0. PMID: 8782753.
P. aeruginosa		RM1	ED667	Human, Isolat sputum from infected patient (Canada)	Laboratory strain (Eric Déziel collection)
P. aeruginosa		LBI	ED677	Environmental, hydrocarbon-contaminated soil (Brazil)	Benincasa, M., Contiero, J., Manresa, M. A., & Moraes, I. O. (2002). Rhamnolipid production by Pseudomonas aeruginosa LBI growing on soapstock as the sole carbon source. Journal of Food Engineering, 54(4), 283-288.
P. aeruginosa		6c	ED679	Environmental, oil industry landfills (Brazil)	Costa, S. G. V. A. D. O., Nitschke, M., & Contiero, J. (2008). Produção de biotensoativos a partir de resíduos de óleos e gorduras. Food Science and Technology, 28, 34-38.
P. aeruginosa		7a	ED680	Environmental, oil industry landfills (Brazil)	Costa, S. G. V. A. D. O., Nitschke, M., & Contiero, J. (2008). Produção de biotensoativos a partir de resíduos de óleos e gorduras. Food Science and Technology, 28, 34-38.
P. aeruginosa		PUPa3	ED798	Environmental, rhizosphere soil of rice (USA)	R. Sunish Kumar and others, Characterization of antifungal metabolite produced by a new strain Pseudomonas aeruginosa PUPa3 that exhibits broad‐spectrum antifungal activity and biofertilizing traits, Journal of Applied Microbiology, Volume 98, Issue 1, 1 January 2005, Pages 145–154, https://doi.org/10.1111/j.1365-2672.2004.02435.x
P. aeruginosa		H103	ED1165	NA	Andrew M. Kropinski, University of Guelph, Guelph, Ontario, Canada. Described in: Hancock RE, Carey AM. Outer membrane of Pseudomonas aeruginosa: heat- 2-mercaptoethanol-modifiable proteins. J Bacteriol. 1979 Dec;140(3):902-10. doi: 10.1128/jb.140.3.902-910.1979. PMID: 118160; PMCID: PMC216732.
P. aeruginosa		PA0303	ED2212	Human, derived from PAO	Paul H. Roy, Département de biochimie et de microbiologie, and Centre de recherche en infectiologie, Université Laval, Québec, Québec, Canada. Described in: Pemberton JM, Clark AJ. Detection and characterization of plasmids in Pseudomonas aeruginosa strain PAO. J Bacteriol. 1973 Apr;114(1):424-33. doi: 10.1128/jb.114.1.424-433.1973. PMID: 4633347; PMCID: PMC251781.
P. aeruginosa		LSPQ2208	ED2214	Human clinical specimen (Canada)	Laboratoire de Santé Publique du Québec, Sainte-Anne-de-Bellevue, QC, Canada.
P. aeruginosa		ATCC 27853 (=Boston 41501)	ED2215	Human, blood culture (USA)	American Type Culture Collection, Rockville, MD, USA.
P. aeruginosa	S. maltophilia	ED480-conta	ED480	Contaminated cultures (Canada)	Laboratory strain (Eric Déziel collection)
P. aeruginosa / S. maltophilia		560 (=ATCC 13636 = LMG 961 =NCTC 10258)	ED3699	Human, cerebrospinal fluid (USA)	Belgian Coordinated Collections of Microorganisms, University of Gent, Belgium.
S. maltophilia		810-2 (=ATCC 13637 =LMG 958 =NCTC10257)	ED3697	Human, mouth	Belgian Coordinated Collections of Microorganisms, University of Gent, Belgium. (Hugh R, Ryschenkow E. Microbiology 26(1):123-132 doi:10.1099/00221287-26-1-123)
S. maltophilia		L00083595	ED3969	Human clinical specimen (Canada)	Laboratoire de Santé Publique du Québec, Sainte-Anne-de-Bellevue, QC, Canada.
S. maltophilia		L00092250	ED3970	Human clinical specimen (Canada)	Laboratoire de Santé Publique du Québec, Sainte-Anne-de-Bellevue, QC, Canada.
S. maltophilia		L00124341	ED3971	Human clinical specimen (Canada)	Laboratoire de Santé Publique du Québec, Sainte-Anne-de-Bellevue, QC, Canada.
S. maltophilia		L00141679	ED3972	Human clinical specimen (Canada)	Laboratoire de Santé Publique du Québec, Sainte-Anne-de-Bellevue, QC, Canada.
S. maltophilia		L00143622	ED3973	Human clinical specimen (Canada)	Laboratoire de Santé Publique du Québec, Sainte-Anne-de-Bellevue, QC, Canada.
S. maltophilia		L00143653	ED3974	Human clinical specimen (Canada)	Laboratoire de Santé Publique du Québec, Sainte-Anne-de-Bellevue, QC, Canada.
S. maltophilia		L00143655	ED3975	Human clinical specimen (Canada)	Laboratoire de Santé Publique du Québec, Sainte-Anne-de-Bellevue, QC, Canada.
S. maltophilia		L00143682	ED3976	Human clinical specimen (Canada)	Laboratoire de Santé Publique du Québec, Sainte-Anne-de-Bellevue, QC, Canada.
S. maltophilia		L00146949	ED3977	Human clinical specimen (Canada)	Laboratoire de Santé Publique du Québec, Sainte-Anne-de-Bellevue, QC, Canada.
S. maltophilia		L00148503	ED3978	Human clinical specimen (Canada)	Laboratoire de Santé Publique du Québec, Sainte-Anne-de-Bellevue, QC, Canada.
S. maltophilia		611 (=ATCC 13843 =LMG 10872 =NCTC10259)	ED3700	Contaminated tissue culture	Belgian Coordinated Collections of Microorganisms, University of Gent, Belgium. (Hugh R, Ryschenkow E. Microbiology 26(1):123-132 doi:10.1099/00221287-26-1-123)
S. maltophilia		2-009-0339-St	ED4673	Fecal matter from a newborn hospitalized in NICU	Laboratory strain (Eric Déziel collection)
S. maltophilia		BF-24-0280-St2	ED4675	Tap aerator from NICU (Canada)	Laboratory strain (Eric Déziel collection)
S. maltophilia		BF-25-0308-St	ED4676	Tap aerator from NICU (Canada)	Laboratory strain (Eric Déziel collection)
P. aeruginosa	Pseudomonas paraeruginosa	PA7 (= NCTC 13628T = ATCC 9027)	ED765	Outer Ear Infection	American Type Culture Collection, Rockville, MD, USA.
P. aeruginosa	Pseudomonas beteli	LMG 978	ED3703	Piper betle (Sri Lanka)	Belgian Coordinated Collections of Microorganisms, University of Gent, Belgium.
P. aeruginosa / S. maltophilia	Stenotrophomonas acidaminiphila	L00129488	ED3979	Human clinical specimen (Canada)	Laboratoire de Santé Publique du Québec, Sainte-Anne-de-Bellevue, QC, Canada.
S. maltophilia	Stenotrophomonas nitritireducens	LMG 22074 (=ATCC BAA-12 =DSM 12575)	ED3701	Laboratory scale biofilter (Germany)	Belgian Coordinated Collections of Microorganisms, University of Gent, Belgium.
S. maltophilia	Stenotrophomonas rhizophila	LMG 24537 (=ATCC BAA-473 =DSM 14405)	ED3702	Rhizosphere of oilseed rape (Germany)	Belgian Coordinated Collections of Microorganisms, University of Gent, Belgium.
P. aeruginosa / S. maltophilia	Serratia marcescens	Db11	ED3837	Insect isolate, Drosophila melanogaster (France)	- Ann Brassinga, University of Manitoba, Winnipeg, MB, Canada. - Jonathan J. Ewbank, University of Aix-Marseille, Marseille, France.
P. aeruginosa		ED2595-conta	ED2595	Contaminated cultures (Canada)	Laboratory strain (Eric Déziel collection)
P. aeruginosa / S. maltophilia	Serratia liquefaciens	ID150497	ED3967	Human clinical specimen (Canada)	Laboratoire de Santé Publique du Québec, Sainte-Anne-de-Bellevue, QC, Canada.
P. aeruginosa / S. maltophilia	Serratia rubidaea	FB299	ED3693	Environmental (USA)	Bernier et al., 1994
P. aeruginosa / S. maltophilia	Delftia tsuruhatensis	WD-S33-14_D	ED4661	Drain water from a NICU (Canada)	Laboratory strain (Eric Déziel collection)
P. aeruginosa / S. maltophilia	Klebsiella pneumoniae	ATCC 4352 (=LMG 3128)	ED3692	Cow's milk	American Type Culture Collection, Rockville, MD, USA.
P. aeruginosa	Staphylococcus haemolyticus	ED2213-conta	ED2213	Contaminated cultures (Canada)	Laboratory strain (Eric Déziel collection)
