# Supplementary material for: High-Throughput Short Sequence Typing Schemes for Pseudomonas aeruginosa and Stenotrophomonas maltophilia Pure Culture and Environmental DNA
Source: Microorganisms. 2023 Dec 27;12(1):48. doi: 10.3390/microorganisms12010048 (PMC10819370; doi:10.3390/microorganisms12010048)
Supplement: Supplementary file 1 [file microorganisms-12-00048-s001.zip › TableS2.A_Pseudomonas_DataBase HiSST.xlsx]

## Sheet: CONTENT
	DATASET S2: This supplemental file includes 6 sheets: - The first sheet gather the main informations of 196 Pseudomonas aeruginosa strains retrieved from public genome database and used for the development and validation of the HiSST scheme. - The sheets #2,#3, #4 and #5 are HiSST sequence type databases of respectively btuB, bvgS, pheT and sdaA loci, based on the 196 Pseudomonas aeruginosa strai…

## Sheet: Sheet1. P_aeruginosa Strains
HiSST	btuB	bvgS	pheT	sdaA	combin_ST	ID	assemblyaccession	assemblyname	assemblystatus
1	1	1	1	1	1-1-1-1	Pseudomonas aeruginosa 12-4-4(59)	GCF_001482325.1	ASM148232v1	Complete Genome
2	52	25	26	40	52-25-26-40	Pseudomonas aeruginosa 12939	GCF_002753655.1	ASM275365v1	Complete Genome
3	2	5	8	9	2-5-8-9	Pseudomonas aeruginosa 1334/14	GCF_004193735.1	ASM419373v1	Complete Genome
3	2	5	8	9	2-5-8-9	Pseudomonas aeruginosa AJ D 2	GCF_004769055.1	ASM476905v1	Chromosome
3	2	5	8	9	2-5-8-9	Pseudomonas aeruginosa FAHZU40	GCF_019909425.1	ASM1990942v1	Contig
4	44	5	8	5	44-5-8-5	Pseudomonas aeruginosa 152962	GCF_016811975.1	ASM1681197v1	Complete Genome
4	44	5	8	5	44-5-8-5	Pseudomonas aeruginosa N15-01092	GCF_003571505.1	ASM357150v1	Complete Genome
4	44	5	8	5	44-5-8-5	Pseudomonas aeruginosa PA-1	GCF_029605905.1	ASM2960590v1	Contig
4	44	5	8	5	44-5-8-5	Pseudomonas aeruginosa PA-2	GCF_024266935.1	ASM2426693v1	Complete Genome
4	44	5	8	5	44-5-8-5	Pseudomonas aeruginosa Pae1255-NDM1	GCF_021378395.1	ASM2137839v1	Complete Genome
5	44	10	41	4	44-10-41-4	Pseudomonas aeruginosa 1811-13R031	GCF_009676765.1	ASM967676v1	Complete Genome
5	44	10	41	4	44-10-41-4	Pseudomonas aeruginosa 1811-18R001	GCF_009676785.1	ASM967678v1	Complete Genome
5	44	10	41	4	44-10-41-4	Pseudomonas aeruginosa AR442	GCF_003073795.1	ASM307379v1	Complete Genome
5	44	10	41	4	44-10-41-4	Pseudomonas aeruginosa CCUG 70744	GCF_003194245.1	ASM319424v1	Complete Genome
5	44	10	41	4	44-10-41-4	Pseudomonas aeruginosa H04	GCF_022570435.1	ASM2257043v1	Complete Genome
6	9	14	7	20	9-14-7-20	Pseudomonas aeruginosa 1903031130	GCF_016745195.1	ASM1674519v1	Complete Genome
6	9	14	7	20	9-14-7-20	Pseudomonas aeruginosa 243931	GCF_007559125.1	ASM755912v1	Complete Genome
6	9	14	7	20	9-14-7-20	Pseudomonas aeruginosa 24Pae112	GCF_003433235.1	ASM343323v1	Complete Genome
6	9	14	7	20	9-14-7-20	Pseudomonas aeruginosa 268	GCF_003641125.1	ASM364112v1	Complete Genome
6	9	14	7	20	9-14-7-20	Pseudomonas aeruginosa 34Pae23	GCF_023093955.2	ASM2309395v2	Chromosome
6	9	14	7	20	9-14-7-20	Pseudomonas aeruginosa 34Pae8	GCF_023093975.1	ASM2309397v1	Complete Genome
6	9	14	7	20	9-14-7-20	Pseudomonas aeruginosa 39016	GCF_003698065.1	ASM369806v1	Contig
6	9	14	7	20	9-14-7-20	Pseudomonas aeruginosa AR_0354	GCF_002968585.1	ASM296858v1	Complete Genome
6	9	14	7	20	9-14-7-20	Pseudomonas aeruginosa AR_0357	GCF_002968955.1	ASM296895v1	Complete Genome
6	9	14	7	20	9-14-7-20	Pseudomonas aeruginosa B-I-1	GCF_015697645.1	ASM1569764v1	Complete Genome
6	9	14	7	20	9-14-7-20	Pseudomonas aeruginosa CCUG 51971	GCF_008195485.1	ASM819548v1	Complete Genome
6	9	14	7	20	9-14-7-20	Pseudomonas aeruginosa E6130952	GCF_002085755.1	ASM208575v1	Complete Genome
6	9	14	7	20	9-14-7-20	Pseudomonas aeruginosa F291007	GCF_019720875.1	ASM1972087v1	Complete Genome
6	9	14	7	20	9-14-7-20	Pseudomonas aeruginosa FDAARGOS_501	GCF_003812905.1	ASM381290v1	Complete Genome
6	9	14	7	20	9-14-7-20	Pseudomonas aeruginosa FDAARGOS_571	GCF_003812885.1	ASM381288v1	Complete Genome
6	9	14	7	20	9-14-7-20	Pseudomonas aeruginosa GIMC5002:PAT-169	GCF_008370085.1	ASM837008v1	Chromosome
6	9	14	7	20	9-14-7-20	Pseudomonas aeruginosa H03	GCF_022570455.1	ASM2257045v1	Complete Genome
6	9	14	7	20	9-14-7-20	Pseudomonas aeruginosa MRSN12280	GCF_003028335.1	ASM302833v1	Complete Genome
6	9	14	7	20	9-14-7-20	Pseudomonas aeruginosa NCGM1900	GCF_000829275.1	ASM82927v1	Complete Genome
6	9	14	7	20	9-14-7-20	Pseudomonas aeruginosa NCGM1984	GCF_000829255.1	ASM82925v1	Complete Genome
6	9	14	7	20	9-14-7-20	Pseudomonas aeruginosa NCGM2.S1	GCF_000284555.1	ASM28455v1	Complete Genome
6	9	14	7	20	9-14-7-20	Pseudomonas aeruginosa NDM1_2	GCF_022559565.1	ASM2255956v1	Chromosome
6	9	14	7	20	9-14-7-20	Pseudomonas aeruginosa P96131	GCF_020990445.1	ASM2099044v1	Complete Genome
6	9	14	7	20	9-14-7-20	Pseudomonas aeruginosa PA19-3047	GCF_016743115.1	ASM1674311v1	Complete Genome
6	9	14	7	20	9-14-7-20	Pseudomonas aeruginosa PB350	GCF_002812905.2	ASM281290v2	Complete Genome
6	9	14	7	20	9-14-7-20	Pseudomonas aeruginosa PB367	GCF_002812925.2	ASM281292v3	Complete Genome
6	9	14	7	20	9-14-7-20	Pseudomonas aeruginosa SE5331	GCF_013393665.2	ASM1339366v2	Complete Genome
6	9	14	7	20	9-14-7-20	Pseudomonas aeruginosa SE5352	GCA_019688135.1	ASM1968813v1	Contig
6	9	14	7	20	9-14-7-20	Pseudomonas aeruginosa SE5429	GCF_016745175.1	ASM1674517v1	Complete Genome
6	9	14	7	20	9-14-7-20	Pseudomonas aeruginosa SE5430	GCF_021497385.1	ASM2149738v1	Complete Genome
6	9	14	7	20	9-14-7-20	Pseudomonas aeruginosa SE5458	GCF_013394475.2	ASM1339447v2	Complete Genome
7	53	26	71	5	53-26-71-5	Pseudomonas aeruginosa 19BR	GCF_000223945.1	ASM22394v2	Chromosome
7	53	26	71	5	53-26-71-5	Pseudomonas aeruginosa E80	GCF_022422415.1	ASM2242241v1	Scaffold
7	53	26	71	5	53-26-71-5	Pseudomonas aeruginosa NCCP15783	GCF_021513295.1	ASM2151329v1	Complete Genome
7	53	26	71	5	53-26-71-5	Pseudomonas aeruginosa PA1088	GCF_001792835.1	ASM179283v1	Complete Genome
7	53	26	71	5	53-26-71-5	Pseudomonas aeruginosa PA11803	GCF_001792875.1	ASM179287v1	Complete Genome
7	53	26	71	5	53-26-71-5	Pseudomonas aeruginosa Pa1242	GCF_002205375.1	ASM220537v1	Complete Genome
7	53	26	71	5	53-26-71-5	Pseudomonas aeruginosa PA298	GCF_005305005.1	ASM530500v1	Complete Genome
7	53	26	71	5	53-26-71-5	Pseudomonas aeruginosa PA7790	GCF_001870265.1	ASM187026v1	Complete Genome
7	53	26	71	5	53-26-71-5	Pseudomonas aeruginosa PA8281	GCF_001792855.1	ASM179285v1	Complete Genome
7	53	26	71	5	53-26-71-5	Pseudomonas aeruginosa WCHPA075019	GCF_003052005.2	ASM305200v2	Complete Genome
7	53	26	71	5	53-26-71-5	Pseudomonas aeruginosa Y71	GCF_003408495.1	ASM340849v1	Complete Genome
7	53	26	71	5	53-26-71-5	Pseudomonas aeruginosa Y89	GCF_003369735.1	ASM336973v1	Complete Genome
8	53	10	9	9	53-10-9-9	Pseudomonas aeruginosa 2020HL-00861	GCF_019443665.1	ASM1944366v1	Complete Genome
9	2	3	3	3	2-3-3-3	Pseudomonas aeruginosa 34Pae36	GCF_023093935.1	ASM2309393v1	Complete Genome
9	2	3	3	3	2-3-3-3	Pseudomonas aeruginosa A-I-1	GCF_015697665.1	ASM1569766v1	Complete Genome
9	2	3	3	3	2-3-3-3	Pseudomonas aeruginosa AG1	GCF_009662315.1	ASM966231v1	Complete Genome
9	2	3	3	3	2-3-3-3	Pseudomonas aeruginosa AR445	GCF_003073735.1	ASM307373v1	Complete Genome
9	2	3	3	3	2-3-3-3	Pseudomonas aeruginosa Carb01 63	GCF_000981825.1	ASM98182v1	Complete Genome
9	2	3	3	3	2-3-3-3	Pseudomonas aeruginosa DL201330	GCF_021497285.1	ASM2149728v1	Complete Genome
9	2	3	3	3	2-3-3-3	Pseudomonas aeruginosa F30658	GCF_001516265.1	ASM151626v1	Complete Genome
9	2	3	3	3	2-3-3-3	Pseudomonas aeruginosa F5677	GCF_002946935.1	ASM294693v1	Complete Genome
9	2	3	3	3	2-3-3-3	Pseudomonas aeruginosa FRD1	GCF_000950725.1	ASM95072v1	Contig
9	2	3	3	3	2-3-3-3	Pseudomonas aeruginosa HB2011305RE	GCF_021497305.1	ASM2149730v1	Complete Genome
9	2	3	3	3	2-3-3-3	Pseudomonas aeruginosa PA38182	GCF_000531435.1	PA38182	Chromosome
9	2	3	3	3	2-3-3-3	Pseudomonas aeruginosa RIVM-EMC2982	GCF_002085605.1	ASM208560v1	Complete Genome
9	2	3	3	3	2-3-3-3	Pseudomonas aeruginosa RW109	GCF_900243355.1	RW109	Complete Genome
9	2	3	3	3	2-3-3-3	Pseudomonas aeruginosa Y82	GCF_003369755.1	ASM336975v1	Complete Genome
10	53	26	5	52	53-26-5-52	Pseudomonas aeruginosa 519119	GCF_007559105.1	ASM755910v1	Complete Genome
11	27	14	29	15	27-14-29-15	Pseudomonas aeruginosa 60503	GCF_007559065.1	ASM755906v1	Complete Genome
11	27	14	29	15	27-14-29-15	Pseudomonas aeruginosa NCTC13715	GCF_900636975.1	45813_F01	Complete Genome
11	27	14	29	15	27-14-29-15	Pseudomonas aeruginosa PA790	GCF_018448985.1	ASM1844898v1	Complete Genome
11	27	14	29	15	27-14-29-15	Pseudomonas aeruginosa PSE6684	GCF_013255565.1	ASM1325556v1	Complete Genome
11	27	14	29	15	27-14-29-15	Pseudomonas aeruginosa ST773	GCF_009664165.1	ASM966416v1	Complete Genome
12	44	25	60	50	44-25-60-50	Pseudomonas aeruginosa 6762	GCF_003665495.1	ASM366549v1	Chromosome
13	14	18	17	28	14-18-17-28	Pseudomonas aeruginosa 8380	GCF_001548135.1	ASM154813v1	Complete Genome
14	16	10	2	16	16-10-2-16	Pseudomonas aeruginosa 8D	GCF_023272755.1	ASM2327275v1	Complete Genome
14	16	10	2	16	16-10-2-16	Pseudomonas aeruginosa E01	GCF_021513635.1	ASM2151363v1	Complete Genome
14	16	10	2	16	16-10-2-16	Pseudomonas aeruginosa E02	GCF_021513615.1	ASM2151361v1	Complete Genome
14	16	10	2	16	16-10-2-16	Pseudomonas aeruginosa E03	GCF_021513595.1	ASM2151359v1	Complete Genome
14	16	10	2	16	16-10-2-16	Pseudomonas aeruginosa FAHZU31	GCF_019909525.1	ASM1990952v1	Contig
14	16	10	2	16	16-10-2-16	Pseudomonas aeruginosa FDAARGOS_570	GCF_003813025.1	ASM381302v1	Complete Genome
14	16	10	2	16	16-10-2-16	Pseudomonas aeruginosa H11	GCF_022569955.1	ASM2256995v1	Chromosome
14	16	10	2	16	16-10-2-16	Pseudomonas aeruginosa JNQH-PA027	GCF_021184245.1	ASM2118424v1	Complete Genome
14	16	10	2	16	16-10-2-16	Pseudomonas aeruginosa KB-PA_F19	GCF_020771675.1	ASM2077167v1	Complete Genome
14	16	10	2	16	16-10-2-16	Pseudomonas aeruginosa PA1616	GCF_023066845.1	ASM2306684v1	Complete Genome
14	16	10	2	16	16-10-2-16	Pseudomonas aeruginosa PAC1	GCF_013201115.1	ASM1320111v1	Complete Genome
14	16	10	2	16	16-10-2-16	Pseudomonas aeruginosa PSE305	GCF_000750905.1	PSE305	Chromosome
14	16	10	2	16	16-10-2-16	Pseudomonas aeruginosa R01	GCF_021513575.1	ASM2151357v1	Complete Genome
14	16	10	2	16	16-10-2-16	Pseudomonas aeruginosa R02	GCF_021513415.1	ASM2151341v1	Complete Genome
14	16	10	2	16	16-10-2-16	Pseudomonas aeruginosa R03	GCF_021513475.1	ASM2151347v1	Complete Genome
14	16	10	2	16	16-10-2-16	Pseudomonas aeruginosa R04	GCF_021513455.1	ASM2151345v1	Complete Genome
14	16	10	2	16	16-10-2-16	Pseudomonas aeruginosa R05	GCF_021513395.1	ASM2151339v1	Complete Genome
14	16	10	2	16	16-10-2-16	Pseudomonas aeruginosa R06	GCF_021513375.1	ASM2151337v1	Complete Genome
14	16	10	2	16	16-10-2-16	Pseudomonas aeruginosa R07	GCF_021513515.1	ASM2151351v1	Complete Genome
14	16	10	2	16	16-10-2-16	Pseudomonas aeruginosa R08	GCF_021513555.1	ASM2151355v1	Complete Genome
14	16	10	2	16	16-10-2-16	Pseudomonas aeruginosa R09	GCF_021513535.1	ASM2151353v1	Complete Genome
14	16	10	2	16	16-10-2-16	Pseudomonas aeruginosa R10	GCF_021513495.1	ASM2151349v1	Complete Genome
14	16	10	2	16	16-10-2-16	Pseudomonas aeruginosa R11	GCF_021513435.1	ASM2151343v1	Complete Genome
14	16	10	2	16	16-10-2-16	Pseudomonas aeruginosa SCAID WND1-2021	GCF_019915445.1	ASM1991544v1	Complete Genome
14	16	10	2	16	16-10-2-16	Pseudomonas aeruginosa SE5357	GCF_016745155.1	ASM1674515v1	Complete Genome
14	16	10	2	16	16-10-2-16	Pseudomonas aeruginosa SE5381	GCF_021497345.1	ASM2149734v1	Complete Genome
14	16	10	2	16	16-10-2-16	Pseudomonas aeruginosa SE5418	GCF_021497365.1	ASM2149736v1	Complete Genome
14	16	10	2	16	16-10-2-16	Pseudomonas aeruginosa SRRSH15	GCF_019910865.1	ASM1991086v1	Contig
14	16	10	2	16	16-10-2-16	Pseudomonas aeruginosa SRRSH1521	GCF_019910205.1	ASM1991020v1	Contig
14	16	10	2	16	16-10-2-16	Pseudomonas aeruginosa W16407	GCF_001516165.2	ASM151616v2	Complete Genome
15	2	5	8	8	2-5-8-8	Pseudomonas aeruginosa 97	GCF_002411865.3	ASM241186v3	Complete Genome
15	2	5	8	8	2-5-8-8	Pseudomonas aeruginosa P4970C	GCF_020990465.1	ASM2099046v1	Complete Genome
15	2	5	8	8	2-5-8-8	Pseudomonas aeruginosa P93127	GCF_020990485.1	ASM2099048v1	Complete Genome
16	2	4	7	7	2-4-7-7	Pseudomonas aeruginosa A0002	GCF_021497445.1	ASM2149744v1	Complete Genome
17	31	4	54	23	31-4-54-23	Pseudomonas aeruginosa A17CT	GCF_013415085.1	ASM1341508v1	Chromosome
18	53	8	23	33	53-8-23-33	Pseudomonas aeruginosa A17PBS	GCF_013415065.1	ASM1341506v1	Chromosome
18	53	8	23	33	53-8-23-33	Pseudomonas aeruginosa ATCC 15692	GCF_001729505.1	ASM172950v1	Complete Genome
18	53	8	23	33	53-8-23-33	Pseudomonas aeruginosa Cas9_1	GCF_009800105.1	ASM980010v1	Chromosome
18	53	8	23	33	53-8-23-33	Pseudomonas aeruginosa Cas9_2	GCF_009800125.1	ASM980012v1	Chromosome
18	53	8	23	33	53-8-23-33	Pseudomonas aeruginosa FDAARGOS_767	GCF_006364735.1	ASM636473v1	Complete Genome
18	53	8	23	33	53-8-23-33	Pseudomonas aeruginosa GIMC5015:PAKB6	GCF_003957825.1	ASM395782v1	Complete Genome
18	53	8	23	33	53-8-23-33	Pseudomonas aeruginosa LIUYANG-A	GCF_013305845.1	ASM1330584v1	Complete Genome
18	53	8	23	33	53-8-23-33	Pseudomonas aeruginosa LIUYANG-C	GCF_013305815.1	ASM1330581v1	Complete Genome
18	53	8	23	33	53-8-23-33	Pseudomonas aeruginosa LIUYANG-E	GCF_013305765.1	ASM1330576v1	Complete Genome
18	53	8	23	33	53-8-23-33	Pseudomonas aeruginosa MIN-155	GCF_021460035.1	ASM2146003v1	Complete Genome
18	53	8	23	33	53-8-23-33	Pseudomonas aeruginosa MPAO1	GCF_016107485.1	ASM1610748v1	Complete Genome
18	53	8	23	33	53-8-23-33	Pseudomonas aeruginosa P16PBS	GCF_013415025.1	ASM1341502v1	Chromosome
18	53	8	23	33	53-8-23-33	Pseudomonas aeruginosa P4CT	GCF_013415005.1	ASM1341500v1	Chromosome
18	53	8	23	33	53-8-23-33	Pseudomonas aeruginosa P4PBS	GCF_013414985.1	ASM1341498v1	Chromosome
18	53	8	23	33	53-8-23-33	Pseudomonas aeruginosa PA0750	GCF_004014755.1	ASM401475v2	Complete Genome
18	53	8	23	33	53-8-23-33	Pseudomonas aeruginosa PAO1	GCF_000006765.1	ASM676v1	Complete Genome
18	53	8	23	33	53-8-23-33	Pseudomonas aeruginosa PAO1-L	GCF_024126335.1	ASM2412633v1	Complete Genome
18	53	8	23	33	53-8-23-33	Pseudomonas aeruginosa PAO1-N	GCF_024126355.1	ASM2412635v1	Complete Genome
18	53	8	23	33	53-8-23-33	Pseudomonas aeruginosa PAO1-VE13	GCF_000484545.1	ASM48454v1	Chromosome
18	53	8	23	33	53-8-23-33	Pseudomonas aeruginosa PAO1-VE2	GCF_000484495.1	ASM48449v1	Chromosome
18	53	8	23	33	53-8-23-33	Pseudomonas aeruginosa PAO1_Kat-X-2	GCF_024089375.1	ASM2408937v1	Complete Genome
18	53	8	23	33	53-8-23-33	Pseudomonas aeruginosa PAO1_Mat-X-1	GCF_024089395.1	ASM2408939v1	Complete Genome
18	53	8	23	33	53-8-23-33	Pseudomonas aeruginosa PAO1_Orsay	GCF_900070375.1	PAO1OR	Complete Genome
18	53	8	23	33	53-8-23-33	Pseudomonas aeruginosa PAO1161	GCF_004102665.1	ASM410266v1	Complete Genome
18	53	8	23	33	53-8-23-33	Pseudomonas aeruginosa PAO1CT	GCF_013414965.1	ASM1341496v1	Chromosome
18	53	8	23	33	53-8-23-33	Pseudomonas aeruginosa PAO1PBS	GCF_013414945.1	ASM1341494v1	Chromosome
18	53	8	23	33	53-8-23-33	Pseudomonas aeruginosa PartH-Paeruginosa-RM8376	GCF_022870025.1	ASM2287002v1	Complete Genome
18	53	8	23	33	53-8-23-33	Pseudomonas aeruginosa PGN4	GCF_003952765.1	ASM395276v1	Chromosome
18	53	8	23	33	53-8-23-33	Pseudomonas aeruginosa PGN5	GCF_003952745.1	ASM395274v1	Chromosome
18	53	8	23	33	53-8-23-33	Pseudomonas aeruginosa UAB2CT	GCF_013414925.1	ASM1341492v1	Chromosome
18	53	8	23	33	53-8-23-33	Pseudomonas aeruginosa UAB2PBS	GCF_013414905.1	ASM1341490v1	Chromosome
19	35	14	56	20	35-14-56-20	Pseudomonas aeruginosa A5803	GCF_022870525.1	ASM2287052v1	Complete Genome
19	35	14	56	20	35-14-56-20	Pseudomonas aeruginosa H08	GCF_022570115.1	ASM2257011v1	Complete Genome
20	2	2	5	5	2-2-5-5	Pseudomonas aeruginosa A681	GCF_007559085.1	ASM755908v1	Complete Genome
20	2	2	5	5	2-2-5-5	Pseudomonas aeruginosa AR_458	GCF_003288435.1	ASM328843v1	Complete Genome
20	2	2	5	5	2-2-5-5	Pseudomonas aeruginosa H07	GCF_022570235.1	ASM2257023v1	Complete Genome
20	2	2	5	5	2-2-5-5	Pseudomonas aeruginosa PAAK088	GCF_013341295.1	ASM1334129v1	Complete Genome
20	2	2	5	5	2-2-5-5	Pseudomonas aeruginosa ZPPH29	GCF_019911085.1	ASM1991108v1	Contig
21	53	4	42	51	53-4-42-51	Pseudomonas aeruginosa AA2	GCF_012935295.1	ASM1293529v1	Complete Genome
21	53	4	42	51	53-4-42-51	Pseudomonas aeruginosa AA43	GCF_022870545.1	ASM2287054v1	Complete Genome
22	50	2	34	5	50-2-34-5	Pseudomonas aeruginosa ACR20	GCF_013467585.1	ASM1346758v1	Complete Genome
22	50	2	34	5	50-2-34-5	Pseudomonas aeruginosa ACR22	GCF_013467605.1	ASM1346760v1	Complete Genome
22	50	2	34	5	50-2-34-5	Pseudomonas aeruginosa B18	GCF_013395035.1	ASM1339503v1	Complete Genome
22	50	2	34	5	50-2-34-5	Pseudomonas aeruginosa DJ06	GCF_019466095.1	ASM1946609v1	Complete Genome
23	44	22	16	4	44-22-16-4	Pseudomonas aeruginosa AES1M	GCF_004355125.1	ASM435512v1	Complete Genome
23	44	22	16	4	44-22-16-4	Pseudomonas aeruginosa AES1R	GCF_004355145.1	ASM435514v1	Complete Genome
24	9	16	27	20	9-16-27-20	Pseudomonas aeruginosa AR_0095	GCF_022406625.1	ASM2240662v1	Contig
25	43	3	15	6	43-3-15-6	Pseudomonas aeruginosa AR_0110	GCF_022406615.1	ASM2240661v1	Contig
25	43	3	15	6	43-3-15-6	Pseudomonas aeruginosa AR_0111	GCF_003571805.1	ASM357180v1	Complete Genome
25	43	3	15	6	43-3-15-6	Pseudomonas aeruginosa AR_0230	GCF_002968695.1	ASM296869v1	Complete Genome
25	43	3	15	6	43-3-15-6	Pseudomonas aeruginosa AR_0360	GCF_022406595.1	ASM2240659v1	Contig
25	43	3	15	6	43-3-15-6	Pseudomonas aeruginosa AR444	GCF_003073615.1	ASM307361v1	Complete Genome
25	43	3	15	6	43-3-15-6	Pseudomonas aeruginosa CDN118	GCF_013347245.1	ASM1334724v1	Complete Genome
25	43	3	15	6	43-3-15-6	Pseudomonas aeruginosa CDN129	GCF_013376775.1	ASM1337677v1	Complete Genome
25	43	3	15	6	43-3-15-6	Pseudomonas aeruginosa K34-7	GCF_003206535.1	ASM320653v1	Complete Genome
25	43	3	15	6	43-3-15-6	Pseudomonas aeruginosa PA83	GCF_002215345.1	ASM221534v1	Complete Genome
25	43	3	15	6	43-3-15-6	Pseudomonas aeruginosa ZBX-P12	GCF_018279285.1	ASM1827928v1	Complete Genome
26	9	14	25	21	9-14-25-21	Pseudomonas aeruginosa AR_0353	GCF_002968655.1	ASM296865v1	Complete Genome
26	9	14	25	21	9-14-25-21	Pseudomonas aeruginosa B10W	GCF_001874465.1	ASM187446v1	Complete Genome
26	9	14	25	21	9-14-25-21	Pseudomonas aeruginosa Pa58	GCF_002192495.1	ASM219249v1	Complete Genome
26	9	14	25	21	9-14-25-21	Pseudomonas aeruginosa PASGNDM345	GCF_002104615.1	ASM210461v1	Complete Genome
26	9	14	25	21	9-14-25-21	Pseudomonas aeruginosa PASGNDM699	GCF_002104595.1	ASM210459v1	Complete Genome
26	9	14	25	21	9-14-25-21	Pseudomonas aeruginosa SCAID PLC1-2021	GCF_019915485.1	ASM1991548v1	Complete Genome
26	9	14	25	21	9-14-25-21	Pseudomonas aeruginosa SCAID TST-2021	GCF_019915465.1	ASM1991546v1	Complete Genome
26	9	14	25	21	9-14-25-21	Pseudomonas aeruginosa WPB099	GCF_003441555.1	ASM344155v1	Chromosome
26	9	14	25	21	9-14-25-21	Pseudomonas aeruginosa WPB100	GCF_003441515.1	ASM344151v1	Chromosome
26	9	14	25	21	9-14-25-21	Pseudomonas aeruginosa WPB101	GCF_003441535.1	ASM344153v1	Chromosome
27	23	14	37	20	23-14-37-20	Pseudomonas aeruginosa AR_0440	GCF_003074095.1	ASM307409v1	Chromosome
27	23	14	37	20	23-14-37-20	Pseudomonas aeruginosa AR_0443	GCF_003074115.1	ASM307411v1	Chromosome
27	23	14	37	20	23-14-37-20	Pseudomonas aeruginosa B14130	GCF_003952305.1	ASM395230v1	Complete Genome
27	23	14	37	20	23-14-37-20	Pseudomonas aeruginosa B17416	GCF_016925455.1	ASM1692545v1	Complete Genome
27	23	14	37	20	23-14-37-20	Pseudomonas aeruginosa B17932	GCF_016925475.1	ASM1692547v1	Complete Genome
27	23	14	37	20	23-14-37-20	Pseudomonas aeruginosa BA7823	GCF_003626935.1	ASM362693v2	Complete Genome
27	23	14	37	20	23-14-37-20	Pseudomonas aeruginosa GIMC5016:PA1840	GCF_004000495.1	ASM400049v1	Chromosome
27	23	14	37	20	23-14-37-20	Pseudomonas aeruginosa GIMC5019:PA52Ts1	GCF_013114915.1	ASM1311491v1	Chromosome
27	23	14	37	20	23-14-37-20	Pseudomonas aeruginosa GIMC5020:PA52Ts2	GCF_013114935.1	ASM1311493v1	Chromosome
27	23	14	37	20	23-14-37-20	Pseudomonas aeruginosa GIMC5021:PA52Ts17	GCF_013114955.1	ASM1311495v1	Chromosome
27	23	14	37	20	23-14-37-20	Pseudomonas aeruginosa GIMC5034:PA52Ts32	GCF_014109785.1	ASM1410978v1	Chromosome
27	23	14	37	20	23-14-37-20	Pseudomonas aeruginosa MINF_3A-sc-2280432	GCF_905071885.1	MINF_3A	Complete Genome
27	23	14	37	20	23-14-37-20	Pseudomonas aeruginosa NCGM257	GCF_001547955.1	ASM154795v1	Complete Genome
27	23	14	37	20	23-14-37-20	Pseudomonas aeruginosa PA179	GCF_014775635.1	ASM1477563v1	Chromosome
27	23	14	37	20	23-14-37-20	Pseudomonas aeruginosa SP2230	GCF_003952285.1	ASM395228v1	Complete Genome
27	23	14	37	20	23-14-37-20	Pseudomonas aeruginosa SP4527	GCF_003991465.1	ASM399146v1	Complete Genome
27	23	14	37	20	23-14-37-20	Pseudomonas aeruginosa ZBX-P13	GCF_018279265.1	ASM1827926v1	Complete Genome
28	10	14	20	21	10-14-20-21	Pseudomonas aeruginosa AR_455	GCF_003288355.1	ASM328835v1	Complete Genome
28	10	14	20	21	10-14-20-21	Pseudomonas aeruginosa H05	GCF_022570415.1	ASM2257041v1	Complete Genome
28	10	14	20	21	10-14-20-21	Pseudomonas aeruginosa PABCH46	GCF_013375875.1	ASM1337587v1	Chromosome
28	10	14	20	21	10-14-20-21	Pseudomonas aeruginosa PABL048	GCF_003411785.2	ASM341178v2	Complete Genome
28	10	14	20	21	10-14-20-21	Pseudomonas aeruginosa PS1793	GCF_006704595.2	ASM670459v2	Complete Genome
28	10	14	20	21	10-14-20-21	Pseudomonas aeruginosa S04 90	GCF_000988505.1	ASM98850v1	Chromosome
29	53	33	35	6	53-33-35-6	Pseudomonas aeruginosa AR_460	GCF_003288335.1	ASM328833v1	Complete Genome
30	30	14	51	20	30-14-51-20	Pseudomonas aeruginosa AR19438	GCF_023101305.1	ASM2310130v1	Complete Genome
30	30	14	51	20	30-14-51-20	Pseudomonas aeruginosa PA0523	GCF_021266605.1	ASM2126660v1	Complete Genome
31	8	4	10	11	8-4-10-11	Pseudomonas aeruginosa AR19583	GCF_023101285.1	ASM2310128v1	Complete Genome
31	8	4	10	11	8-4-10-11	Pseudomonas aeruginosa AR19640	GCF_023101265.1	ASM2310126v1	Complete Genome
31	8	4	10	11	8-4-10-11	Pseudomonas aeruginosa PABCH09	GCF_013375775.1	ASM1337577v1	Chromosome
31	8	4	10	11	8-4-10-11	Pseudomonas aeruginosa paerg002	GCF_900618255.1	paerg002	Complete Genome
31	8	4	10	11	8-4-10-11	Pseudomonas aeruginosa paerg003	GCF_900618275.1	paerg003	Complete Genome
31	8	4	10	11	8-4-10-11	Pseudomonas aeruginosa paerg004	GCF_900618265.1	paerg004	Complete Genome
31	8	4	10	11	8-4-10-11	Pseudomonas aeruginosa paerg010	GCF_900618315.1	paerg010	Complete Genome
31	8	4	10	11	8-4-10-11	Pseudomonas aeruginosa paerg011	GCF_900618325.1	paerg011	Complete Genome
31	8	4	10	11	8-4-10-11	Pseudomonas aeruginosa paerg012	GCF_900618335.1	paerg012	Complete Genome
31	8	4	10	11	8-4-10-11	Pseudomonas aeruginosa SE5452	GCF_021497425.1	ASM2149742v1	Complete Genome
32	55	2	4	19	55-2-4-19	Pseudomonas aeruginosa AR439	GCF_003073895.1	ASM307389v1	Complete Genome
32	55	2	4	19	55-2-4-19	Pseudomonas aeruginosa ATCC 27853	GCF_024507955.1	ASM2450795v1	Complete Genome
32	55	2	4	19	55-2-4-19	Pseudomonas aeruginosa F9670	GCF_001542835.1	ASM154283v1	Complete Genome
32	55	2	4	19	55-2-4-19	Pseudomonas aeruginosa FDAARGOS_1041	GCF_016126955.1	ASM1612695v1	Complete Genome
32	55	2	4	19	55-2-4-19	Pseudomonas aeruginosa FDAARGOS_505	GCF_003813005.1	ASM381300v1	Complete Genome
32	55	2	4	19	55-2-4-19	Pseudomonas aeruginosa FDAARGOS_532	GCF_003812165.1	ASM381216v1	Complete Genome
32	55	2	4	19	55-2-4-19	Pseudomonas aeruginosa NCTC12903	GCF_900636755.1	43941_E01	Complete Genome
32	55	2	4	19	55-2-4-19	Pseudomonas aeruginosa Pa1207	GCF_002208645.1	ASM220864v1	Complete Genome
32	55	2	4	19	55-2-4-19	Pseudomonas aeruginosa PAAK095	GCF_013341315.1	ASM1334131v1	Complete Genome
32	55	2	4	19	55-2-4-19	Pseudomonas aeruginosa PABCH01	GCF_013375915.1	ASM1337591v1	Chromosome
32	55	2	4	19	55-2-4-19	Pseudomonas aeruginosa PABCH14	GCF_013375855.1	ASM1337585v1	Chromosome
32	55	2	4	19	55-2-4-19	Pseudomonas aeruginosa PABCH42	GCF_013375895.1	ASM1337589v1	Chromosome
32	55	2	4	19	55-2-4-19	Pseudomonas aeruginosa S86968	GCF_001515845.2	ASM151584v2	Complete Genome
32	55	2	4	19	55-2-4-19	Pseudomonas aeruginosa SE5369	GCF_013393685.1	ASM1339368v1	Complete Genome
32	55	2	4	19	55-2-4-19	Pseudomonas aeruginosa T38079	GCF_001515915.2	ASM151591v2	Complete Genome
32	55	2	4	19	55-2-4-19	Pseudomonas aeruginosa UNC_PaerCF20	GCF_019434075.1	ASM1943407v1	Complete Genome
33	2	2	4	4	2-2-4-4	Pseudomonas aeruginosa ATCC BAA-2108	GCF_022699505.1	ASM2269950v1	Complete Genome
34	14	19	3	29	14-19-3-29	Pseudomonas aeruginosa ATCC BAA-2114	GCF_022699485.1	ASM2269948v1	Complete Genome
35	47	14	30	20	47-14-30-20	Pseudomonas aeruginosa B136-33	GCF_000359505.1	ASM35950v1	Complete Genome
36	23	14	37	38	23-14-37-38	Pseudomonas aeruginosa B41226	GCF_003950235.1	ASM395023v1	Complete Genome
37	22	24	45	15	22-24-45-15	Pseudomonas aeruginosa BAMC 07-48	GCF_001632245.1	ASM163224v1	Complete Genome
37	22	24	45	15	22-24-45-15	Pseudomonas aeruginosa K19PSE24	GCF_013201015.1	ASM1320101v1	Chromosome
38	14	13	23	13	14-13-23-13	Pseudomonas aeruginosa BH9	GCF_003795165.1	ASM379516v1	Chromosome
38	14	13	23	13	14-13-23-13	Pseudomonas aeruginosa LYT4	GCF_012971705.1	ASM1297170v1	Complete Genome
39	3	7	11	4	3-7-11-4	Pseudomonas aeruginosa C-I-1	GCF_015697605.1	ASM1569760v1	Complete Genome
40	4	10	14	16	4-10-14-16	Pseudomonas aeruginosa C7-25, C7-25	GCF_902703215.1	C7-25	Complete Genome
41	44	31	2	15	44-31-2-15	Pseudomonas aeruginosa C7447m	GCF_000468935.1	ASM46893v1	Chromosome
42	38	17	26	21	38-17-26-21	Pseudomonas aeruginosa C79	GCF_023933545.1	ASM2393354v1	Scaffold
42	38	17	26	21	38-17-26-21	Pseudomonas aeruginosa DN1	GCF_001722005.2	ASM172200v2	Complete Genome
42	38	17	26	21	38-17-26-21	Pseudomonas aeruginosa Ocean-1155	GCF_002237405.1	ASM223740v1	Complete Genome
42	38	17	26	21	38-17-26-21	Pseudomonas aeruginosa Ocean-1175	GCF_002237425.1	ASM223742v1	Complete Genome
42	38	17	26	21	38-17-26-21	Pseudomonas aeruginosa TL1285	GCF_018986715.1	ASM1898671v1	Complete Genome
42	38	17	26	21	38-17-26-21	Pseudomonas aeruginosa ZBX-P11	GCF_018279305.1	ASM1827930v1	Complete Genome
43	44	3	4	14	44-3-4-14	Pseudomonas aeruginosa CF39S	GCF_011466835.1	ASM1146683v1	Complete Genome
43	44	3	4	14	44-3-4-14	Pseudomonas aeruginosa PcyII-29, PcyII-29	GCF_902703185.1	PcyII-29	Complete Genome
44	47	2	22	5	47-2-22-5	Pseudomonas aeruginosa CFSAN084950	GCF_009648875.1	ASM964887v1	Complete Genome
45	53	10	70	6	53-10-70-6	Pseudomonas aeruginosa CHA	GCF_022870565.1	ASM2287056v1	Complete Genome
45	53	10	70	6	53-10-70-6	Pseudomonas aeruginosa H15	GCF_022569935.1	ASM2256993v1	Complete Genome
45	53	10	70	6	53-10-70-6	Pseudomonas aeruginosa PA59	GCF_009497675.1	ASM949767v1	Complete Genome
45	53	10	70	6	53-10-70-6	Pseudomonas aeruginosa PAER4_119	GCF_001879525.1	ASM187952v1	Complete Genome
45	53	10	70	6	53-10-70-6	Pseudomonas aeruginosa WTJH17	GCF_018138065.1	ASM1813806v1	Complete Genome
46	30	21	28	16	30-21-28-16	Pseudomonas aeruginosa CI27	GCF_022810825.1	ASM2281082v1	Complete Genome
46	30	21	28	16	30-21-28-16	Pseudomonas aeruginosa H02	GCF_022570475.1	ASM2257047v1	Complete Genome
46	30	21	28	16	30-21-28-16	Pseudomonas aeruginosa H26023	GCF_003798145.1	ASM379814v1	Complete Genome
46	30	21	28	16	30-21-28-16	Pseudomonas aeruginosa L10	GCF_002223805.1	ASM222380v1	Complete Genome
46	30	21	28	16	30-21-28-16	Pseudomonas aeruginosa M1608	GCF_001516365.2	ASM151636v2	Complete Genome
46	30	21	28	16	30-21-28-16	Pseudomonas aeruginosa M37351	GCF_001516385.1	ASM151638v1	Complete Genome
46	30	21	28	16	30-21-28-16	Pseudomonas aeruginosa PA-VAP-3	GCF_004346985.1	ASM434698v1	Chromosome
46	30	21	28	16	30-21-28-16	Pseudomonas aeruginosa PA14Or_reads	GCF_900095805.1	PA14Or	Complete Genome
46	30	21	28	16	30-21-28-16	Pseudomonas aeruginosa UCBPP-PA14	GCF_006974045.1	ASM697404v1	Chromosome
47	62	2	31	17	62-2-31-17	Pseudomonas aeruginosa CMC-097	GCF_016064595.1	ASM1606459v1	Complete Genome
47	62	2	31	17	62-2-31-17	Pseudomonas aeruginosa E90	GCF_022422175.1	ASM2242217v1	Scaffold
47	62	2	31	17	62-2-31-17	Pseudomonas aeruginosa PABCH45	GCF_013375835.1	ASM1337583v1	Chromosome
47	62	2	31	17	62-2-31-17	Pseudomonas aeruginosa W60856	GCF_001516225.2	ASM151622v2	Complete Genome
48	40	20	59	46	40-20-59-46	Pseudomonas aeruginosa CMC-115	GCF_012276675.1	ASM1227667v1	Complete Genome
49	53	2	9	19	53-2-9-19	Pseudomonas aeruginosa D-2	GCF_024397355.1	ASM2439735v1	Complete Genome
50	18	4	35	26	18-4-35-26	Pseudomonas aeruginosa D5	GCF_023380065.1	ASM2338006v1	Complete Genome
51	43	2	9	5	43-2-9-5	Pseudomonas aeruginosa DK1 substr. NH57388A	GCF_900069025.1	ASM90006902v1	Complete Genome
51	43	2	9	5	43-2-9-5	Pseudomonas aeruginosa NHmuc	GCF_001900265.1	ASM190026v1	Complete Genome
51	43	2	9	5	43-2-9-5	Pseudomonas aeruginosa SCVFeb	GCF_001900195.1	ASM190019v1	Complete Genome
51	43	2	9	5	43-2-9-5	Pseudomonas aeruginosa SCVJan	GCF_001900225.1	ASM190022v1	Complete Genome
52	35	4	9	4	35-4-9-4	Pseudomonas aeruginosa DK2	GCF_000271365.1	ASM27136v1	Complete Genome
53	22	10	12	4	22-10-12-4	Pseudomonas aeruginosa DSM 50071	GCF_900167195.1	IMG-taxon 2568526011 annotated assembly	Contig
54	4	2	16	11	4-2-16-11	Pseudomonas aeruginosa DVT401	GCF_013343575.1	ASM1334357v1	Complete Genome
55	44	22	2	5	44-22-2-5	Pseudomonas aeruginosa DVT410	GCF_013343555.1	ASM1334355v1	Complete Genome
56	30	27	2	5	30-27-2-5	Pseudomonas aeruginosa DVT412	GCF_013343535.1	ASM1334353v1	Complete Genome
57	47	14	7	21	47-14-7-21	Pseudomonas aeruginosa DVT413	GCF_013343515.1	ASM1334351v1	Complete Genome
58	62	10	79	4	62-10-79-4	Pseudomonas aeruginosa DVT414	GCF_013343495.1	ASM1334349v1	Complete Genome
59	26	10	2	35	26-10-2-35	Pseudomonas aeruginosa DVT417	GCF_013343455.1	ASM1334345v1	Complete Genome
60	22	10	43	5	22-10-43-5	Pseudomonas aeruginosa DVT421	GCF_013343415.1	ASM1334341v1	Complete Genome
61	48	15	31	9	48-15-31-9	Pseudomonas aeruginosa DVT423	GCF_013343395.1	ASM1334339v1	Complete Genome
61	48	15	31	9	48-15-31-9	Pseudomonas aeruginosa E125	GCF_022649105.1	ASM2264910v1	Complete Genome
61	48	15	31	9	48-15-31-9	Pseudomonas aeruginosa early NN2	GCF_900185255.1	NN2	Complete Genome
61	48	15	31	9	48-15-31-9	Pseudomonas aeruginosa H26027	GCF_003798105.1	ASM379810v1	Complete Genome
61	48	15	31	9	48-15-31-9	Pseudomonas aeruginosa NCTC13620	GCF_901472565.1	36340_H02	Complete Genome
61	48	15	31	9	48-15-31-9	Pseudomonas aeruginosa SG17M	GCF_020978345.1	ASM2097834v1	Complete Genome
61	48	15	31	9	48-15-31-9	Pseudomonas aeruginosa W36662	GCF_001516185.2	ASM151618v2	Complete Genome
62	39	13	23	19	39-13-23-19	Pseudomonas aeruginosa DVT425	GCF_013343375.1	ASM1334337v1	Complete Genome
63	58	35	9	54	58-35-9-54	Pseudomonas aeruginosa DVT427	GCF_013343355.1	ASM1334335v1	Complete Genome
64	30	2	3	19	30-2-3-19	Pseudomonas aeruginosa DVT429	GCF_013343335.1	ASM1334333v1	Complete Genome
65	43	30	24	19	43-30-24-19	Pseudomonas aeruginosa DVT729	GCF_013343315.1	ASM1334331v1	Complete Genome
65	43	30	24	19	43-30-24-19	Pseudomonas aeruginosa E104	GCF_022638055.1	ASM2263805v1	Complete Genome
65	43	30	24	19	43-30-24-19	Pseudomonas aeruginosa E131	GCF_022638175.1	ASM2263817v1	Complete Genome
65	43	30	24	19	43-30-24-19	Pseudomonas aeruginosa E167	GCF_022649245.1	ASM2264924v1	Complete Genome
65	43	30	24	19	43-30-24-19	Pseudomonas aeruginosa FA-HZ1	GCF_001750705.1	ASM175070v1	Complete Genome
65	43	30	24	19	43-30-24-19	Pseudomonas aeruginosa H10	GCF_022569975.1	ASM2256997v1	Complete Genome
65	43	30	24	19	43-30-24-19	Pseudomonas aeruginosa HS9	GCF_003319235.1	ASM331923v1	Complete Genome
65	43	30	24	19	43-30-24-19	Pseudomonas aeruginosa KRP1	GCF_009676885.1	ASM967688v1	Complete Genome
65	43	30	24	19	43-30-24-19	Pseudomonas aeruginosa NCTC13618	GCF_901472595.1	36340_C01	Complete Genome
65	43	30	24	19	43-30-24-19	Pseudomonas aeruginosa paerg000	GCF_900618245.1	paerg000	Complete Genome
65	43	30	24	19	43-30-24-19	Pseudomonas aeruginosa W45909	GCF_001516205.2	ASM151620v2	Complete Genome
66	2	7	9	4	2-7-9-4	Pseudomonas aeruginosa DVT779	GCF_013343475.1	ASM1334347v1	Complete Genome
67	10	3	21	11	10-3-21-11	Pseudomonas aeruginosa E04	GCF_021513675.1	ASM2151367v1	Complete Genome
68	6	11	19	5	6-11-19-5	Pseudomonas aeruginosa E113	GCF_022637915.1	ASM2263791v1	Complete Genome
69	53	2	8	23	53-2-8-23	Pseudomonas aeruginosa Environ_1	GCF_009800145.1	ASM980014v1	Chromosome
69	53	2	8	23	53-2-8-23	Pseudomonas aeruginosa Environ_2	GCF_009800165.1	ASM980016v1	Chromosome
70	54	5	60	5	54-5-60-5	Pseudomonas aeruginosa F092021	GCF_019711215.1	ASM1971121v1	Complete Genome
70	54	5	60	5	54-5-60-5	Pseudomonas aeruginosa PA3	GCF_025723085.1	ASM2572308v1	Complete Genome
70	54	5	60	5	54-5-60-5	Pseudomonas aeruginosa ZPPH1	GCF_019911605.1	ASM1991160v1	Contig
70	54	5	60	5	54-5-60-5	Pseudomonas aeruginosa ZPPH2	GCF_019911585.1	ASM1991158v1	Contig
70	54	5	60	5	54-5-60-5	Pseudomonas aeruginosa ZPPH33	GCF_019911025.1	ASM1991102v1	Contig
71	2	2	2	2	2-2-2-2	Pseudomonas aeruginosa F13	GCF_024266805.1	ASM2426680v1	Complete Genome
72	19	2	4	19	19-2-4-19	Pseudomonas aeruginosa F22031	GCF_000816985.1	ASM81698v1	Complete Genome
72	19	2	4	19	19-2-4-19	Pseudomonas aeruginosa WTJH12	GCF_019913665.1	ASM1991366v1	Contig
73	2	4	8	11	2-4-8-11	Pseudomonas aeruginosa F23197	GCF_001516245.2	ASM151624v2	Complete Genome
74	2	9	5	14	2-9-5-14	Pseudomonas aeruginosa F63912	GCF_001594325.2	ASM159432v2	Complete Genome
75	46	10	9	9	46-10-9-9	Pseudomonas aeruginosa F9676	GCF_001077475.1	ASM107747v1	Complete Genome
76	47	10	67	5	47-10-67-5	Pseudomonas aeruginosa FDAARGOS_610	GCF_006364795.1	ASM636479v1	Complete Genome
76	47	10	67	5	47-10-67-5	Pseudomonas aeruginosa NCTC13359	GCF_901472545.1	36340_E01	Complete Genome
76	47	10	67	5	47-10-67-5	Pseudomonas aeruginosa PA8329	GCF_021398755.1	ASM2139875v1	Complete Genome
76	47	10	67	5	47-10-67-5	Pseudomonas aeruginosa PRD-10	GCF_005154325.1	ASM515432v1	Chromosome
77	13	8	25	18	13-8-25-18	Pseudomonas aeruginosa G-I-1	GCF_015697465.1	ASM1569746v1	Complete Genome
78	26	2	39	21	26-2-39-21	Pseudomonas aeruginosa H06	GCF_022570395.1	ASM2257039v1	Chromosome
78	26	2	39	21	26-2-39-21	Pseudomonas aeruginosa ISS SRV-K	GCF_022533445.1	ASM2253344v1	Complete Genome
79	14	20	33	30	14-20-33-30	Pseudomonas aeruginosa H09	GCF_022569995.1	ASM2256999v1	Complete Genome
80	35	24	41	43	35-24-41-43	Pseudomonas aeruginosa H16	GCF_022569915.1	ASM2256991v1	Complete Genome
81	22	2	40	6	22-2-40-6	Pseudomonas aeruginosa H17	GCA_024999625.1	PDT001388871.1	Contig
82	47	10	23	5	47-10-23-5	Pseudomonas aeruginosa H19	GCF_022569875.1	ASM2256987v1	Chromosome
83	14	2	31	18	14-2-31-18	Pseudomonas aeruginosa H20	GCF_022569855.1	ASM2256985v1	Complete Genome
83	14	2	31	18	14-2-31-18	Pseudomonas aeruginosa PACS2	GCF_000168335.1	ASM16833v1	Chromosome
84	47	14	66	21	47-14-66-21	Pseudomonas aeruginosa H25883	GCF_003798125.1	ASM379812v1	Complete Genome
84	47	14	66	21	47-14-66-21	Pseudomonas aeruginosa ST1076_d100blood1	GCF_022810905.1	ASM2281090v1	Complete Genome
84	47	14	66	21	47-14-66-21	Pseudomonas aeruginosa ST1076_d100blood2	GCF_022811805.1	ASM2281180v1	Complete Genome
84	47	14	66	21	47-14-66-21	Pseudomonas aeruginosa ST1076_d118limb1	GCF_022810885.1	ASM2281088v1	Complete Genome
84	47	14	66	21	47-14-66-21	Pseudomonas aeruginosa St1076_d123blood	GCF_022810865.1	ASM2281086v1	Complete Genome
84	47	14	66	21	47-14-66-21	Pseudomonas aeruginosa ST1076_d97burn1	GCF_022810965.1	ASM2281096v1	Complete Genome
84	47	14	66	21	47-14-66-21	Pseudomonas aeruginosa ST1076_d97burn2	GCF_022810925.1	ASM2281092v1	Complete Genome
85	60	2	4	14	60-2-4-14	Pseudomonas aeruginosa H27930	GCF_001516325.2	ASM151632v2	Complete Genome
86	44	14	51	20	44-14-51-20	Pseudomonas aeruginosa H47921	GCF_001516345.1	ASM151634v1	Complete Genome
87	15	2	32	21	15-2-32-21	Pseudomonas aeruginosa H5708	GCF_001516305.2	ASM151630v2	Complete Genome
88	44	2	52	33	44-2-52-33	Pseudomonas aeruginosa HOU1	GCF_008245185.1	ASM824518v1	Complete Genome
89	43	2	68	11	43-2-68-11	Pseudomonas aeruginosa HS17-127	GCF_020312095.1	ASM2031209v1	Contig
90	58	2	47	21	58-2-47-21	Pseudomonas aeruginosa HU20	GCF_022453765.1	ASM2245376v1	Complete Genome
91	41	18	60	4	41-18-60-4	Pseudomonas aeruginosa IMP-13	GCF_003950015.1	ASM395001v1	Complete Genome
92	43	3	4	5	43-3-4-5	Pseudomonas aeruginosa IMP66	GCF_008033765.1	ASM803376v1	Complete Genome
92	43	3	4	5	43-3-4-5	Pseudomonas aeruginosa IMP67	GCF_008033725.1	ASM803372v1	Complete Genome
92	43	3	4	5	43-3-4-5	Pseudomonas aeruginosa IMP68	GCF_008033745.1	ASM803374v1	Complete Genome
92	43	3	4	5	43-3-4-5	Pseudomonas aeruginosa T63266	GCF_001516105.1	ASM151610v1	Complete Genome
93	58	2	23	29	58-2-23-29	Pseudomonas aeruginosa INP-43	GCF_009905195.1	ASM990519v1	Complete Genome
94	35	14	63	20	35-14-63-20	Pseudomonas aeruginosa IOMTU 133	GCF_001548335.1	ASM154833v1	Complete Genome
95	35	29	44	21	35-29-44-21	Pseudomonas aeruginosa JB2	GCF_003060845.1	ASM306084v1	Complete Genome
96	32	25	52	40	32-25-52-40	Pseudomonas aeruginosa JNQH-PA033	GCF_021184265.1	ASM2118426v1	Complete Genome
97	22	14	28	20	22-14-28-20	Pseudomonas aeruginosa JNQH-PA57	GCF_014217315.1	ASM1421731v1	Complete Genome
98	6	13	19	19	6-13-19-19	Pseudomonas aeruginosa JT86	GCF_014854655.1	ASM1485465v1	Complete Genome
99	35	14	30	21	35-14-30-21	Pseudomonas aeruginosa KC-Tt-1	GCF_014930935.1	ASM1493093v1	Complete Genome
100	11	14	29	21	11-14-29-21	Pseudomonas aeruginosa L00-a	GCF_023520735.1	ASM2352073v1	Complete Genome
101	22	10	48	5	22-10-48-5	Pseudomonas aeruginosa LES431	GCF_000508765.1	ASM50876v1	Complete Genome
101	22	10	48	5	22-10-48-5	Pseudomonas aeruginosa LESB58	GCF_000026645.1	ASM2664v1	Complete Genome
101	22	10	48	5	22-10-48-5	Pseudomonas aeruginosa LESB65	GCF_000583955.1	ASM58395v1	Chromosome
101	22	10	48	5	22-10-48-5	Pseudomonas aeruginosa LESlike1	GCF_000583975.1	ASM58397v1	Chromosome
102	22	24	41	20	22-24-41-20	Pseudomonas aeruginosa LS.2c	GCF_022453825.1	ASM2245382v1	Complete Genome
103	30	10	2	19	30-10-2-19	Pseudomonas aeruginosa LV	GCF_003347525.2	ASM334752v2	Chromosome
104	20	21	7	31	20-21-7-31	Pseudomonas aeruginosa LW	GCF_004010895.1	ASM401089v1	Complete Genome
105	17	2	34	5	17-2-34-5	Pseudomonas aeruginosa LYSZa2	GCF_017378475.1	ASM1737847v1	Complete Genome
105	17	2	34	5	17-2-34-5	Pseudomonas aeruginosa LYSZa5	GCF_017378395.1	ASM1737839v1	Complete Genome
106	33	25	53	41	33-25-53-41	Pseudomonas aeruginosa LYSZa7	GCF_016584725.1	ASM1658472v1	Complete Genome
107	8	4	23	22	8-4-23-22	Pseudomonas aeruginosa M18	GCF_000226155.1	ASM22615v1	Complete Genome
107	8	4	23	22	8-4-23-22	Pseudomonas aeruginosa PA_150577	GCF_002442855.1	ASM244285v1	Complete Genome
107	8	4	23	22	8-4-23-22	Pseudomonas aeruginosa Pa608	GCF_029871035.1	ASM2987103v1	Scaffold
108	57	7	2	5	57-7-2-5	Pseudomonas aeruginosa M8A1	GCF_002116945.1	ASM211694v1	Chromosome
109	2	2	13	15	2-2-13-15	Pseudomonas aeruginosa M8A4	GCF_002116985.1	ASM211698v1	Chromosome
110	31	15	26	18	31-15-26-18	Pseudomonas aeruginosa MINF_7A-sc-2280434	GCF_904866275.1	MINF_7A	Complete Genome
111	22	10	43	21	22-10-43-21	Pseudomonas aeruginosa mPA08-31	GCF_015034565.1	ASM1503456v1	Chromosome
112	10	2	7	26	10-2-7-26	Pseudomonas aeruginosa MS14403	GCA_021705595.1	PDT000750270.1	Contig
113	22	24	49	21	22-24-49-21	Pseudomonas aeruginosa MTB-1	GCF_000504045.1	ASM50404v1	Complete Genome
114	53	7	3	46	53-7-3-46	Pseudomonas aeruginosa N17-1	GCF_001606045.1	ASM160604v1	Complete Genome
115	7	8	2	18	7-8-2-18	Pseudomonas aeruginosa NCTC10728	GCF_900637045.1	46837_C02	Complete Genome
116	14	18	5	5	14-18-5-5	Pseudomonas aeruginosa NCTC11445	GCF_900636735.1	43941_C01	Complete Genome
117	6	12	19	5	6-12-19-5	Pseudomonas aeruginosa NDTH10366	GCF_019913405.1	ASM1991340v1	Contig
117	6	12	19	5	6-12-19-5	Pseudomonas aeruginosa NDTH7329	GCF_019913345.1	ASM1991334v1	Contig
117	6	12	19	5	6-12-19-5	Pseudomonas aeruginosa NDTH9845	GCF_019913425.1	ASM1991342v1	Contig
117	6	12	19	5	6-12-19-5	Pseudomonas aeruginosa P23	GCF_028595525.2	ASM2859552v2	Complete Genome
117	6	12	19	5	6-12-19-5	Pseudomonas aeruginosa P33	GCF_001181065.1	P33_London_28_VIM_2_02_12	Contig
117	6	12	19	5	6-12-19-5	Pseudomonas aeruginosa PA2207	GCF_019434235.1	ASM1943423v1	Complete Genome
117	6	12	19	5	6-12-19-5	Pseudomonas aeruginosa QZPH16	GCF_019913225.1	ASM1991322v1	Contig
117	6	12	19	5	6-12-19-5	Pseudomonas aeruginosa QZPH21	GCF_019913205.1	ASM1991320v1	Contig
117	6	12	19	5	6-12-19-5	Pseudomonas aeruginosa R31	GCF_014792125.1	ASM1479212v1	Complete Genome
117	6	12	19	5	6-12-19-5	Pseudomonas aeruginosa SRRSH1002	GCF_019910495.1	ASM1991049v1	Contig
117	6	12	19	5	6-12-19-5	Pseudomonas aeruginosa SRRSH1120	GCF_019910415.1	ASM1991041v1	Contig
117	6	12	19	5	6-12-19-5	Pseudomonas aeruginosa SRRSH1408	GCF_019910305.1	ASM1991030v1	Contig
117	6	12	19	5	6-12-19-5	Pseudomonas aeruginosa SRRSH2790	GCF_019909885.1	ASM1990988v1	Contig
117	6	12	19	5	6-12-19-5	Pseudomonas aeruginosa TL3773	GCF_019379355.1	ASM1937935v1	Complete Genome
118	44	7	52	4	44-7-52-4	Pseudomonas aeruginosa NRD619	GCF_014467035.1	ASM1446703v1	Complete Genome
119	53	2	9	29	53-2-9-29	Pseudomonas aeruginosa NY4605	GCF_022699525.1	ASM2269952v1	Complete Genome
120	31	2	55	19	31-2-55-19	Pseudomonas aeruginosa P16CT	GCF_013415045.1	ASM1341504v1	Chromosome
121	49	2	9	47	49-2-9-47	Pseudomonas aeruginosa P8W	GCF_019738995.2	ASM1973899v2	Complete Genome
121	49	2	9	47	49-2-9-47	Pseudomonas aeruginosa P9W	GCF_019710495.1	ASM1971049v1	Complete Genome
122	47	14	69	49	47-14-69-49	Pseudomonas aeruginosa PA-VAP-1	GCF_004347005.1	ASM434700v1	Chromosome
123	58	10	55	18	58-10-55-18	Pseudomonas aeruginosa PA-VAP-2	GCF_004347025.1	ASM434702v1	Chromosome
123	58	10	55	18	58-10-55-18	Pseudomonas aeruginosa SCV20265	GCF_000510305.1	ASM51030v1	Complete Genome
124	42	14	62	23	42-14-62-23	Pseudomonas aeruginosa PA_154197	GCF_002075065.1	ASM207506v1	Complete Genome
125	9	14	28	27	9-14-28-27	Pseudomonas aeruginosa PA_D1	GCF_001721745.1	ASM172174v1	Complete Genome
125	9	14	28	27	9-14-28-27	Pseudomonas aeruginosa PA_D16	GCF_001721805.1	ASM172180v1	Complete Genome
125	9	14	28	27	9-14-28-27	Pseudomonas aeruginosa PA_D2	GCF_001721765.1	ASM172176v1	Complete Genome
125	9	14	28	27	9-14-28-27	Pseudomonas aeruginosa PA_D21	GCF_001722045.1	ASM172204v1	Complete Genome
125	9	14	28	27	9-14-28-27	Pseudomonas aeruginosa PA_D22	GCF_001721825.1	ASM172182v1	Complete Genome
125	9	14	28	27	9-14-28-27	Pseudomonas aeruginosa PA_D25	GCF_001721845.1	ASM172184v1	Complete Genome
125	9	14	28	27	9-14-28-27	Pseudomonas aeruginosa PA_D5	GCF_001722025.1	ASM172202v1	Complete Genome
125	9	14	28	27	9-14-28-27	Pseudomonas aeruginosa PA_D9	GCF_001721785.1	ASM172178v1	Complete Genome
126	45	2	25	7	45-2-25-7	Pseudomonas aeruginosa PA1	GCF_000496605.2	ASM49660v2	Complete Genome
126	45	2	25	7	45-2-25-7	Pseudomonas aeruginosa PA1R	GCF_000496645.1	ASM49664v1	Complete Genome
126	45	2	25	7	45-2-25-7	Pseudomonas aeruginosa PA1RG	GCF_001293085.1	ASM129308v1	Complete Genome
126	45	2	25	7	45-2-25-7	Pseudomonas aeruginosa UNC_PaerCF34	GCF_021166335.2	ASM2116633v2	Complete Genome
127	57	2	77	7	57-2-77-7	Pseudomonas aeruginosa PA1_NCHU	GCF_022670795.1	ASM2267079v1	Complete Genome
128	5	4	15	17	5-4-15-17	Pseudomonas aeruginosa Pa12	GCA_023991975.1	PDT001342731.1	Contig
129	62	4	4	14	62-4-4-14	Pseudomonas aeruginosa PA121617	GCF_001679685.1	ASM167968v1	Complete Genome
130	24	23	9	20	24-23-9-20	Pseudomonas aeruginosa Pa124	GCF_002192475.1	ASM219247v1	Complete Genome
130	24	23	9	20	24-23-9-20	Pseudomonas aeruginosa Pa127	GCF_009727535.1	ASM972753v1	Contig
130	24	23	9	20	24-23-9-20	Pseudomonas aeruginosa paerg005	GCF_900618285.1	paerg005	Complete Genome
130	24	23	9	20	24-23-9-20	Pseudomonas aeruginosa paerg009	GCF_900618305.1	paerg009	Complete Genome
130	24	23	9	20	24-23-9-20	Pseudomonas aeruginosa PcyII-40, PcyII-40	GCF_902703195.1	PcyII-40	Complete Genome
131	25	10	38	19	25-10-38-19	Pseudomonas aeruginosa PA1609	GCF_023066865.1	ASM2306686v1	Complete Genome
132	53	6	23	5	53-6-23-5	Pseudomonas aeruginosa PA1681	GCF_023066825.1	ASM2306682v1	Complete Genome
133	9	14	22	20	9-14-22-20	Pseudomonas aeruginosa PA34	GCF_003332705.2	ASM333270v2	Complete Genome
133	9	14	22	20	9-14-22-20	Pseudomonas aeruginosa SE5431	GCF_021497405.1	ASM2149740v1	Complete Genome
134	21	22	36	32	21-22-36-32	Pseudomonas aeruginosa Pa84	GCF_002205335.1	ASM220533v1	Complete Genome
135	62	4	25	22	62-4-25-22	Pseudomonas aeruginosa PA96	GCF_000626655.2	ASM62665v2	Chromosome
136	34	24	35	4	34-24-35-4	Pseudomonas aeruginosa PABCH05	GCF_013375755.1	ASM1337575v1	Chromosome
137	36	25	57	44	36-25-57-44	Pseudomonas aeruginosa PABCH10	GCF_013375815.1	ASM1337581v1	Chromosome
137	36	25	57	44	36-25-57-44	Pseudomonas aeruginosa ZS-PA-05	GCF_022220245.1	ASM2222024v1	Chromosome
138	10	2	1	4	10-2-1-4	Pseudomonas aeruginosa PABCH13	GCF_013375795.1	ASM1337579v1	Chromosome
138	10	2	1	4	10-2-1-4	Pseudomonas aeruginosa PAD8	GCF_022700635.2	ASM2270063v2	Complete Genome
138	10	2	1	4	10-2-1-4	Pseudomonas aeruginosa PAG5	GCF_011106815.1	ASM1110681v1	Complete Genome
139	53	3	42	51	53-3-42-51	Pseudomonas aeruginosa PABL012	GCF_003429185.1	ASM342918v1	Complete Genome
139	53	3	42	51	53-3-42-51	Pseudomonas aeruginosa T2101	GCF_009720425.1	ASM972042v1	Complete Genome
140	51	4	23	18	51-4-23-18	Pseudomonas aeruginosa PABL017	GCF_003429205.1	ASM342920v1	Complete Genome
141	22	25	44	36	22-25-44-36	Pseudomonas aeruginosa PAC6	GCF_013201095.1	ASM1320109v1	Complete Genome
142	22	2	8	23	22-2-8-23	Pseudomonas aeruginosa PAG7	GCF_018141565.1	ASM1814156v1	Complete Genome
142	22	2	8	23	22-2-8-23	Pseudomonas aeruginosa PAM68	GCF_018141645.1	ASM1814164v1	Complete Genome
142	22	2	8	23	22-2-8-23	Pseudomonas aeruginosa PAS6	GCF_018141625.1	ASM1814162v1	Complete Genome
143	22	2	8	33	22-2-8-33	Pseudomonas aeruginosa PAK	GCF_000568855.2	ASM56885v2	Complete Genome
144	56	34	76	53	56-34-76-53	Pseudomonas aeruginosa PAO1H2O	GCF_000714515.1	ASM71451v1	Chromosome
145	53	7	74	11	53-7-74-11	Pseudomonas aeruginosa PARM801	GCF_016864415.1	ASM1686441v1	Complete Genome
146	30	28	5	42	30-28-5-42	Pseudomonas aeruginosa Pb18	GCF_002117045.1	ASM211704v1	Chromosome
147	37	13	61	26	37-13-61-26	Pseudomonas aeruginosa PB353	GCF_002812865.1	ASM281286v1	Complete Genome
147	37	13	61	26	37-13-61-26	Pseudomonas aeruginosa PB354	GCF_002812885.1	ASM281288v1	Complete Genome
148	22	14	46	21	22-14-46-21	Pseudomonas aeruginosa PB368	GCF_002812845.1	ASM281284v1	Complete Genome
148	22	14	46	21	22-14-46-21	Pseudomonas aeruginosa PB369	GCF_002812825.1	ASM281282v1	Complete Genome
149	28	3	47	4	28-3-47-4	Pseudomonas aeruginosa PcyII-10	GCF_900149285.1	PcyII-10	Complete Genome
150	2	4	10	11	2-4-10-11	Pseudomonas aeruginosa PDNC003	GCF_016919425.1	ASM1691942v1	Chromosome
151	2	2	6	6	2-2-6-6	Pseudomonas aeruginosa PES_P749	GCF_022559545.1	ASM2255954v1	Complete Genome
152	35	17	26	21	35-17-26-21	Pseudomonas aeruginosa PPF-1	GCF_002287725.2	ASM228772v2	Complete Genome
153	44	2	41	48	44-2-41-48	Pseudomonas aeruginosa Ps33	GCA_021667935.1	PDT000866293.1	Contig
154	37	2	1	4	37-2-1-4	Pseudomonas aeruginosa QZPH41	GCF_019911705.1	ASM1991170v1	Contig
155	43	13	64	5	43-13-64-5	Pseudomonas aeruginosa R20-14	GCF_024300845.1	ASM2430084v1	Complete Genome
156	5	3	17	18	5-3-17-18	Pseudomonas aeruginosa RD1-3	GCF_009911735.1	ASM991173v1	Complete Genome
157	2	2	5	14	2-2-5-14	Pseudomonas aeruginosa RP73	GCF_000414035.1	ASM41403v1	Complete Genome
158	22	14	42	5	22-14-42-5	Pseudomonas aeruginosa S-1	GCF_019378915.1	ASM1937891v1	Complete Genome
159	2	2	12	12	2-2-12-12	Pseudomonas aeruginosa SCAID PHRX1-2019	GCF_013200975.1	ASM1320097v1	Chromosome
159	2	2	12	12	2-2-12-12	Pseudomonas aeruginosa SCAID WND1-2019	GCF_007567285.1	ASM756728v1	Chromosome
160	44	5	8	19	44-5-8-19	Pseudomonas aeruginosa SCAID WND2-2019	GCF_007566955.1	ASM756695v1	Chromosome
161	49	32	23	23	49-32-23-23	Pseudomonas aeruginosa SCAID WND3-2019	GCF_007567125.1	ASM756712v1	Chromosome
162	2	6	9	10	2-6-9-10	Pseudomonas aeruginosa SE5416	GCF_013393705.1	ASM1339370v1	Complete Genome
162	2	6	9	10	2-6-9-10	Pseudomonas aeruginosa SE5419	GCF_019720855.1	ASM1972085v1	Complete Genome
163	10	2	1	25	10-2-1-25	Pseudomonas aeruginosa SE5443	GCF_013394455.1	ASM1339445v1	Complete Genome
164	23	14	37	37	23-14-37-37	Pseudomonas aeruginosa SP4371	GCF_003950255.1	ASM395025v1	Complete Genome
165	23	14	37	39	23-14-37-39	Pseudomonas aeruginosa SP4528	GCF_003716765.1	ASM371676v1	Complete Genome
166	30	10	9	9	30-10-9-9	Pseudomonas aeruginosa ST167_d26burn	GCF_022811045.1	ASM2281104v1	Complete Genome
166	30	10	9	9	30-10-9-9	Pseudomonas aeruginosa ST167_d57blood	GCF_022811065.1	ASM2281106v1	Complete Genome
166	30	10	9	9	30-10-9-9	Pseudomonas aeruginosa ST167_d67burn1	GCF_022810985.1	ASM2281098v1	Complete Genome
166	30	10	9	9	30-10-9-9	Pseudomonas aeruginosa ST167_d67burn2	GCF_022811025.1	ASM2281102v1	Complete Genome
166	30	10	9	9	30-10-9-9	Pseudomonas aeruginosa ST167_d68blood1	GCF_022811005.1	ASM2281100v1	Complete Genome
166	30	10	9	9	30-10-9-9	Pseudomonas aeruginosa ST167_d68blood2	GCF_022810945.1	ASM2281094v1	Complete Genome
167	10	14	5	21	10-14-5-21	Pseudomonas aeruginosa T2436	GCF_009720405.1	ASM972040v1	Complete Genome
168	29	10	2	14	29-10-2-14	Pseudomonas aeruginosa T52373	GCF_001516005.1	ASM151600v1	Complete Genome
169	36	25	58	45	36-25-58-45	Pseudomonas aeruginosa TJ2014-049	GCF_016105885.1	ASM1610588v1	Complete Genome
170	8	15	26	24	8-15-26-24	Pseudomonas aeruginosa TJ2019-017	GCF_016105665.1	ASM1610566v1	Complete Genome
171	30	26	8	5	30-26-8-5	Pseudomonas aeruginosa TJ2019-022	GCF_016105505.1	ASM1610550v1	Complete Genome
172	53	3	25	3	53-3-25-3	Pseudomonas aeruginosa UNC_PaerCF05	GCF_019434175.1	ASM1943417v1	Complete Genome
173	8	2	2	19	8-2-2-19	Pseudomonas aeruginosa UNC_PaerCF13	GCF_021166375.2	ASM2116637v2	Complete Genome
174	59	3	25	3	59-3-25-3	Pseudomonas aeruginosa UNC_PaerCF14	GCF_019434155.1	ASM1943415v1	Complete Genome
175	43	15	25	26	43-15-25-26	Pseudomonas aeruginosa UNC_PaerCF17	GCF_019434095.1	ASM1943409v1	Complete Genome
176	16	3	2	3	16-3-2-3	Pseudomonas aeruginosa UNC_PaerCF19	GCF_021166355.2	ASM2116635v2	Complete Genome
177	44	12	65	4	44-12-65-4	Pseudomonas aeruginosa UNC_PaerCF25	GCF_023571485.1	ASM2357148v1	Complete Genome
178	8	2	24	23	8-2-24-23	Pseudomonas aeruginosa UNC_PaerCF35	GCF_021166315.2	ASM2116631v2	Complete Genome
179	53	2	73	5	53-2-73-5	Pseudomonas aeruginosa UNC_PaerCF37	GCF_021166295.1	ASM2116629v2	Complete Genome
180	30	2	44	5	30-2-44-5	Pseudomonas aeruginosa UNC_PaerCF38	GCF_021166275.2	ASM2116627v2	Complete Genome
181	22	18	3	34	22-18-3-34	Pseudomonas aeruginosa UNC_PaerCF41	GCF_021166255.2	ASM2116625v2	Complete Genome
182	30	2	50	5	30-2-50-5	Pseudomonas aeruginosa US449	GCF_023822305.1	ASM2382230v1	Complete Genome
183	53	2	75	18	53-2-75-18	Pseudomonas aeruginosa USDA-ARS-USMARC-41639	GCF_001518975.1	ASM151897v1	Complete Genome
184	29	3	25	29	29-3-25-29	Pseudomonas aeruginosa VA-134	GCF_001447845.1	ASM144784v1	Complete Genome
185	12	17	30	20	12-17-30-20	Pseudomonas aeruginosa VRFPA04	GCF_000473745.2	ASM47374v3	Complete Genome
186	53	3	9	5	53-3-9-5	Pseudomonas aeruginosa WPB098	GCF_003441575.1	ASM344157v1	Chromosome
187	5	3	18	4	5-3-18-4	Pseudomonas aeruginosa X78812	GCF_001542795.2	ASM154279v2	Complete Genome
188	61	5	78	5	61-5-78-5	Pseudomonas aeruginosa Y31	GCF_003369775.1	ASM336977v1	Complete Genome
189	2	8	12	13	2-8-12-13	Pseudomonas aeruginosa YB01	GCF_009867055.1	ASM986705v1	Complete Genome
190	14	3	31	5	14-3-31-5	Pseudomonas aeruginosa YD001	GCF_013260445.1	ASM1326044v1	Complete Genome
191	62	13	9	5	62-13-9-5	Pseudomonas aeruginosa YL84	GCF_000524595.1	ASM52459v1	Complete Genome
192	58	10	77	5	58-10-77-5	Pseudomonas aeruginosa YT12746	GCF_013305645.2	ASM1330564v2	Complete Genome
192	58	10	77	5	58-10-77-5	Pseudomonas aeruginosa YTSEY8	GCA_019686205.1	ASM1968620v1	Contig
193	53	2	72	52	53-2-72-52	Pseudomonas aeruginosa YTSY4	GCF_021497325.1	ASM2149732v1	Complete Genome
194	22	3	15	6	22-3-15-6	Pseudomonas aeruginosa YY322	GCF_019466145.1	ASM1946614v1	Complete Genome
195	63	3	15	6	63-3-15-6	Pseudomonas aeruginosa ZBX-P23	GCF_018279245.1	ASM1827924v1	Complete Genome
196	53	2	16	35	53-2-16-35	Pseudomonas aeruginosa ZPPH14	GCF_019911385.1	ASM1991138v1	Contig

## Sheet: Sheet2. btuB database
SST-btuB	Strains	Sequences
SST-1	Pseudomonas aeruginosa 12-4-4(59)	GCCAAGCCGTTCTTCTCCGCCGGCTACGGCACCCATCAGACCCTGGAGGGTAGCGCCGGGGTCAGCGGCGGCGCTGGCAACGGCTGGTACAGCCTCGGGGTGAGCAGCTTCGATACGGCGGGCATCAACGCCAAGCGCGCAGGCACCTCGAGCTACGAACCAGACCGCGATGGCTATCGCAACCTGTCCGGTAACCTGCGCGGCGGCTATCGCTTCGACAATGGCCTGGAACTCGACGGCACGCTGCTCAGGGCCAAGTCGCACAACGACTATGACCAGGTTTTCGGCAACTCTGGTTTCAATGCCAACGCCGACGGCGAGCAGAACCTG
SST-2	Pseudomonas aeruginosa F13;Pseudomonas aeruginosa 34Pae36;Pseudomonas aeruginosa ATCC BAA-2108;Pseudomonas aeruginosa H07;Pseudomonas aeruginosa PES_P749;Pseudomonas aeruginosa A0002;Pseudomonas aeruginosa HB2011305RE;Pseudomonas aeruginosa DL201330;Pseudomonas aeruginosa P93127;Pseudomonas aeruginosa P4970C;Pseudomonas aeruginosa FAHZU40;Pseudomonas aeruginosa ZPPH29;Pseudomonas aeruginosa SE541…	GCCAAGCCGTTCTTCTCCGCCGGCTACGGCACCCATCAGACCCTGGAGGGTAGCGCCGGGGTCAGCGGCGGCGCTGGCAACGGCTGGTACAGCCTCGGGGTGAGCAGCTTCGATACGGCGGGCATCAACGCCAAGCGCGCAGGCACCTCGAGCTACGAACCAGACCGCGATGGCTATCGCAACCTGTCCGGTAACCTGCGCGGCGGCTATCGCTTCGACAATGGCCTGGAACTCGACGGCACGCTGCTCAGGGCCAAGTCGCACAACGACTATGACCAGGTTTTCGGCAACTCTGGTTTCAATACCAACGCCGACGGCGAGCAGAACCTG
SST-3	Pseudomonas aeruginosa C-I-1	GCCAAGCCGTTCTTCTCCGCCGGCTACGGCACCCATCAGACCCTGGAGGGTAGCGCCGGGGTCAGCGGCGGCGCTGGCAACGGCTGGTACAGCCTCGGGGTGAGCAGCTTCGATACGGCGGGCATCAACGCCAAGCGCGCAGGCACCTCGAGCTACGAACCAGACCGCGATGGCTATCGCAACCTGTCCGGTAACCTGCGCGGCGGCTATCGCTTCGACAATGGCCTGGAACTCGACGGCACGCTGCTCAGGGCCAAGTCGCACAACGACTATGACCAGGTTTTCGGCAACTCCGGTTTCAATGCCAACGCCGACGGCGAGCAGAACCTG
SST-4	Pseudomonas aeruginosa C7-25, C7-25;Pseudomonas aeruginosa DVT401	GCCAAGCCGTTCTTCTCCGCCGGCTACGGCACCCATCAGACCCTGGAGGGTAGCGCCGGGGTCAGCGGCGGCGCTGGCAACGGCTGGTACAGCCTCGGGGTGAGCAGCTTCGATACGGCGGGCATCAACGCCAAGCGCGCAGGCACCTCGAGCTACGAACCAGACCGCGATGGCTATCGCAACCTGTCCGGTAACCTGCGCGGCGGCTATCGCTTCGACAATGGCCTGGAACTCGACGGCACCCTGCTCAGGGCCAAGTCGCACAACGACTATGACCAGGTTTTCGGCAACTCTGGTTTCAATACCAACGCCGACGGCGAGCAGAACCTG
SST-5	Pseudomonas aeruginosa Pa12;Pseudomonas aeruginosa RD1-3;Pseudomonas aeruginosa X78812	GCCAAGCCGTTCTTCTCCGCCGGCTACGGCACTCATCAGACCCTGGAGGGTAGCGCCGGGGTCAGCGGCGGCGCTGGCAACGGCTGGTACAGCCTCGGGGTGAGCAGCTTCGATACGGCGGGCATCAACGCCAAGCGCGCAGGCACCTCGAGCTACGAACCAGACCGCGATGGCTATCGCAACCTGTCCGGTAACCTGCGCGGCGGCTATCGCTTCGACAATGGCCTGGAACTCGACGGCACGCTGCTCAGGGCCAAGTCGCACAACGACTATGACCAGGTTTTCGGCAACTCTGGTTTCAATACCAACGCCGACGGCGAGCAGAACCTG
SST-6	Pseudomonas aeruginosa E113;Pseudomonas aeruginosa NDTH7329;Pseudomonas aeruginosa QZPH16;Pseudomonas aeruginosa QZPH21;Pseudomonas aeruginosa SRRSH1120;Pseudomonas aeruginosa SRRSH2790;Pseudomonas aeruginosa NDTH10366;Pseudomonas aeruginosa SRRSH1408;Pseudomonas aeruginosa SRRSH1002;Pseudomonas aeruginosa PA2207;Pseudomonas aeruginosa TL3773;Pseudomonas aeruginosa NDTH9845;Pseudomonas aeruginosa…	GCCAAGCCGTTCTTCTCCGCCGGCTACGGCACCCATCAGACCCTGGAGGGCAGCGCCGGGGTCAGCGGCGGCGCTGGCAACGGCTGGTACAGCCTCGGGGTGAGCAGCTTCGATACGGCGGGCATCAACGCCAAGCGCGCAGGCACCTCGAGCTACGAACCAGACCGCGATGGCTATCGCAACCTGTCCGGTAACCTGCGCGGCGGCTATCGCTTCGACAATGGCCTGGAACTCGACGGCACGCTGCTCAGGGCCAAGTCGCACAACGACTATGACCAGGTTTTCGGCAACTCCGGTTTCAATACCAACGCCGACGGCGAGCAGAACCTG
SST-7	Pseudomonas aeruginosa NCTC10728	GCCAAGCCGTTCTTCTCCGCCGGTTACGGCACCCATCAGACCCTGGAGGGCAGCGCCGGGGTCAGCGGCGGCGCTGGCAACGGCTGGTACAGCCTCGGGGTGAGCAGCTTCGATACGGCGGGCATCAACGCCAAGCGCGCAGGCACCTCGAGCTACGAACCAGACCGCGATGGCTATCGCAACCTGTCCGGTAACCTGCGCGGCGGCTATCGCTTCGACAATGGCCTGGAACTCGACGGCACGCTGCTCAGGGCCAAGTCGCACAACGACTATGACCAGGTTTTCGGCAACTCTGGTTTCAATACCAACGCCGACGGCGAGCAGAACCTG
SST-8	Pseudomonas aeruginosa AR19583;Pseudomonas aeruginosa AR19640;Pseudomonas aeruginosa SE5452;Pseudomonas aeruginosa Pa608;Pseudomonas aeruginosa UNC_PaerCF13;Pseudomonas aeruginosa UNC_PaerCF35;Pseudomonas aeruginosa TJ2019-017;Pseudomonas aeruginosa PABCH09;Pseudomonas aeruginosa paerg012;Pseudomonas aeruginosa paerg011;Pseudomonas aeruginosa paerg010;Pseudomonas aeruginosa paerg003;Pseudomonas a…	GCCAAGCCGTTCTTCTCCGCCGGCTACGGCACCCATCACACCCTGGAGGGCAGCGCCGGGGTCAGCGGCGGCGCTGGCAACGGCTGGTACAGCCTCGGGGTGAGCAGCTTCGATACGGCGGGCATCAACGCCAAGCGCGCAGGCACCTCGAGCTACGAACCAGACCGCGATGGCTATCGCAACCTGTCCGGTAACCTGCGCGGCGGCTATCGCTTCGACAATGGCCTGGAACTCGACGGCACGCTGCTCAGGGCCAAGTCGCACAACGACTATGACCAGGTTTTCGGCAACTCCGGTTTCAATACCAACGCCGACGGCGAGCAGAACCTG
SST-9	Pseudomonas aeruginosa 34Pae8;Pseudomonas aeruginosa 34Pae23;Pseudomonas aeruginosa H03;Pseudomonas aeruginosa NDM1_2;Pseudomonas aeruginosa SE5431;Pseudomonas aeruginosa SE5430;Pseudomonas aeruginosa P96131;Pseudomonas aeruginosa SCAID PLC1-2021;Pseudomonas aeruginosa SCAID TST-2021;Pseudomonas aeruginosa F291007;Pseudomonas aeruginosa 1903031130;Pseudomonas aeruginosa SE5429;Pseudomonas aerugin…	GCCAAGCCGTTCTTCTCCGCCGGCTACGGCACCCATCACACCCTGGAGGGCAGCGCCGGGGTCAGCGGCGGCGCTGGCAACGGTTGGTACAGCCTCGGGGTGAGCAGCTTCGATACGGCGGGCATCAACGCCAAGCGCGCAGGCACCTCGAGCTACGAACCAGACCGCGATGGCTATCGCAACCTGTCCGGTAACCTGCGCGGCGGCTATCGCTTCGACAATGGCCTGGAACTCGACGGCACGCTGCTCAGGGCCAAGTCGCACAACGACTATGACCAGGTTTTCGGCAACTCTGGTTTCAATACCAACGCCGACGGCGAGCAGAACCTG
SST-10	Pseudomonas aeruginosa PAD8;Pseudomonas aeruginosa H05;Pseudomonas aeruginosa E04;Pseudomonas aeruginosa SE5443;Pseudomonas aeruginosa PABCH46;Pseudomonas aeruginosa PABCH13;Pseudomonas aeruginosa PAG5;Pseudomonas aeruginosa MS14403;Pseudomonas aeruginosa PS1793;Pseudomonas aeruginosa T2436;Pseudomonas aeruginosa PABL048;Pseudomonas aeruginosa AR_455;Pseudomonas aeruginosa S04 90	GCCAAGCCGTTCTTCTCCGCCGGTTACGGCACCCATCAGACCCTGGAGGGCAGCGCCGGGGTCAGCGGCGGCGCTGGCAACGGCTGGTACAGCCTCGGGGTGAGCAGCTTCGATACGGCGGGCATCAACGCCAAGCGCGCAGGCACCTCGAGCTACGAACCAGACCGCGATGGCTATCGCAACCTGTCCGGTAACCTGCGTGGCGGCTATCGCTTCGACAATGGCCTGGAACTCGACGGCACGCTGCTCAGGGCCAAGTCGCACAACGACTATGACCAGGTTTTCGGCAACTCTGGTTTCAATACCAACGCCGACGGCGAGCAGAACCTG
SST-11	Pseudomonas aeruginosa L00-a	GCCAAGCCGTTCTTCTCCGCCGGCTACGGCACCCATCACACCCTGGAGGGCAGCGCCGGGGTCAGCGGCGGCGCTGGCAACGGTTGGTACAGCCTCGGGGTGAGCAGCTTCGATACGGCGGGCATCAACGCCAAGCGCGCAGGCACCTCGAGCTACGAACCAGACCGCGATGGCTATCGCAACCTGTCCGGTAACCTGCGCGGCGGCTATCGCTTCGACAATGGCCTGGAACTCGACGGCACCCTGCTCAGGGCCAAGTCGCACAACGACTATGACCAGGTTTTCGGCAACTCTGGTTTCAATACCAACGCCGACGGCGAGCAGAACCTG
SST-12	Pseudomonas aeruginosa VRFPA04	GCCAAGCCGTTCTTCTCCGCCGGTTACGGCACCCATCAGACCCTGGAGGGTGGCGCCGGGGTCAGCGGCGGCGCTGGCAACGGCTGGTACAGCCTCGGGGTGAGCAGTTTCGATACGGCGGGCATCAACGCCAAGCGCGCAGGCACCTCGAGCTACGAACCAGACCGCGATGGCTATCGCAACCTGTCCGGTAACCTGCGCGGCGGCTATCGCTTCGACAATGGCCTGGAACTCGACGGCACGCTGCTCAGGGCCAAGTCGCACAACGACTATGACCAGGTCTTCGGCAACTCTGGTTTCAATACCAACGCCGACGGCGAGCAGAACCTG
SST-13	Pseudomonas aeruginosa G-I-1	GCCAAGCCGTTCTTCTCCGCCGGCTACGGCACCCATCACACCCTGGAGGGCAGCGCCGGGGTCAGCGGCGGCGCTGGCAACGGCTGGTACAGCCTCGGGGTGAGCAGCTTCGATACGGCGGGCATCAACGCCAAGCGCGCAGGCACCTCGAGCTACGAACCAGACCGCGATGGCTATCGCAACCTGTCCGGTAACCTGCGCGGCGGCTATCGCTTCGACAATGGCCTGGAACTCGACGGTACCCTGCTGAGGGCCAAGTCGCACAACGACTATGACCAGGTCTTCGGCAACTCCGGTTTCAATGCCAACGCCGACGGCGAGCAGAACCTG
SST-14	Pseudomonas aeruginosa YD001;Pseudomonas aeruginosa LYT4;Pseudomonas aeruginosa NCTC11445;Pseudomonas aeruginosa BH9;Pseudomonas aeruginosa 8380;Pseudomonas aeruginosa PACS2;Pseudomonas aeruginosa ATCC BAA-2114;Pseudomonas aeruginosa H09;Pseudomonas aeruginosa H20	GCCAAGCCGTTCTTCTCCGCCGGCTACGGCACCCATCAGACCCTGGAGGGTAGCGCCGGGGTCAGCGGCGGCGCTGGCAACGGCTGGTACAGCCTCGGGGTGAGCAGCTTCGATACGGCAGGCATCAATACCAAGCGCGCCGGTACTGCGGGCTATGAGCCGGACCGCGACGGCTACCGCAACCTGTCCGGTAACCTGCGCGGCGGCTATCGCTTCGACAATGGCCTGGAACTCGACGGCACGCTGCTCAGGGCCAAGTCGCACAACGACTATGACCAGGTTTTCGGCAACTCCGGTTTCAATGCCAACGCCGACGGCGAGCAGAACCTG
SST-15	Pseudomonas aeruginosa H5708	GCCAAGCCGTTCTTCTCCGCCGGCTACGGCACCCATCAGACCCTGGAGGGTAGCGCCGGGGTCAGCGGCGGCGCTGGCAACGGCTGGTACAGCCTAGGGGTGAGCAGCTTCGATACGGCGGGAATCAACACCAAGCGCGCCGGTACTGCGGGCTATGAGCCGGACCGCGACGGCTACCGCAACCTGTCCGGTAACCTGCGCGGCGGCTATCGCTTCGACAATGGCCTGGAACTCGACGGCACGCTGCTCAGGGCCAAGTCGCACAACGACTATGACCAGGTTTTCGGCAACTCCGGTTTCAATGCCAACGCCGACGGCGAGCAGAACCTG
SST-16	Pseudomonas aeruginosa 8D;Pseudomonas aeruginosa PA1616;Pseudomonas aeruginosa H11;Pseudomonas aeruginosa E01;Pseudomonas aeruginosa E02;Pseudomonas aeruginosa E03;Pseudomonas aeruginosa R01;Pseudomonas aeruginosa R08;Pseudomonas aeruginosa R09;Pseudomonas aeruginosa R07;Pseudomonas aeruginosa R10;Pseudomonas aeruginosa R03;Pseudomonas aeruginosa R04;Pseudomonas aeruginosa R11;Pseudomonas aerugin…	GCCAAGCCGTTCTTCTCCGCCGGCTACGGCACCCATCAGACCCTGGAGGGTAGCGCCGGGGTCAGCGGCGGCGCTGGCAACGGCTGGTACAGCCTAGGGGTGAGCAGCTTCGATACGGCAGGCATCAATACCAAGCGCGCCGGTACTGCGGGCTATGAGCCGGACCGCGACGGCTACCGCAACCTGTCCGGTAACCTGCGCGGCGGCTATCGCTTCGACAATGGCCTGGAACTCGACGGCACGCTGCTCAGGGCCAAGTCGCACAACGACTATGACCAGGTTTTCGGCAACTCCGGTTTCAATGCCAACGCCGACGGCGAGCAGAACCTG
SST-17	Pseudomonas aeruginosa LYSZa2;Pseudomonas aeruginosa LYSZa5	GCCAAGCCGTTCTTCTCCGCCGGCTACGGCACCCATCAGACCCTGGAGGGTAGCGCCGGGGTCAGCGGCGGCGCTGGCAACGGCTGGTACAGCCTCGGGGTGAGCCGCTTCGATACGGCAGGCATCAATACCAAGCGCGCCGGTACTGCGGGCTATGAGCCGGACCGCGACGGCTACCGCAACCTGTCCGGTAACCTGCGCGGCGGCTATCGCTTCGACAATGGCCTGGAACTCGACGGCACGCTGCTCAGGGCCAAGTCGCACAACGACTATGACCAGGTTTTCGGCAACTCCGGTTTCAATGCCAACGCCGACGGCGAGCAGAACCTG
SST-18	Pseudomonas aeruginosa D5	GCCAAGCCGTTCTTCTCCGCCGGCTACGGCACCCATCAGACCCTGGAGGGTAGCGCCGGGGTCAGCGGCGGCGCTGGCAACGGCTGGTACAGCCTCGGGGTGAGCCGCTTCGATACGGCAGGCATCAATACCAAGCGCGCCGGTACTGCGGGCTATGAGCCGGACCGCGACGGCTACCGCAACCTGTCCGGTAACCTGCGCGGCGGCTATCGCTTCGACAATGGCCTGGAACTCGACGGCACGCTGCTCAGGGCCAAGTCGCACAACGACTATGACCAGGTCTTCGGCAACTCCGGTTTCAATGCCAACGCCGACGGCGAGCAGAACCTG
SST-19	Pseudomonas aeruginosa WTJH12;Pseudomonas aeruginosa F22031	GCCAAGCCGTTCTTCTCCGCCGGCTACGGCACCCATCAGACCCTGGAGGGTAGCGCCGGGGTCAGCGGCGGCGCTGGCAACGGCTGGTACAGCCTCGGGGTGAGCAGCTTCGATACGGCAGGCATCAATACCAAGCGCGCCGGTACTGCGGGCTATGAGCCGGACCGCGACGGCTACCGCAACCTGTCCGGTAACCTGCGCGGCGGCTATCGCTTCGACAATGGCCTGGAACTCGACGGCACGCTGCTCAGGGCCAAGTCGCACAACGACTATGACCAGGTCCTCGGCAACTCTGGTTTCAATACCAACGCCGACGGCGAGCAGAACCTG
SST-20	Pseudomonas aeruginosa LW	GCCAAGCCGTTCTTCTCCGCCGGCTACGGCACCCATCAGACCCTGGAGGGTAGCGCCGGGGTCAGCGGCGGCGCTGGCAACGGCTGGTACAGCCTCGGGGTGAGCAGTTTCGATACGGCGGGGATCAATACCAAGCGCGCCGGTACTGCGGGCTATGAGCCAGACCGCGACGGCTACCGCAACCTGTCCGGCAACCTGCGCGGCGGCTATCGCTTCGACAATGGCCTGGAACTCGACGGCACCCTGCTCAGGGCCAAGTCGCACAACGACTATGACCAGGTCTTCGGCAACTCCGGTTTCAATGCCAACGCCGACGGCGAGCAGAACCTG
SST-21	Pseudomonas aeruginosa Pa84	GCCAAGCCGTTCTTCTCCGCCGGTTACGGCACCCATCAGACCCTGGAGGGTAGCGCCGGGGTCAGCGGCGGCGCTGGCAACGGCTGGTACAGCCTCGGGGTGAGCAGCTTCGATACGGCAGGCATCAATACCAAGCGCGCCGGTACTGCGGGCTATGAGCCGGACCGCGACGGCTACCGCAACCTGTCCGGTAACCTGCGCGGCGGCTATCGCTTCGACAATGGCCTGGAACTCGACGGCACGCTGCTCAGGGCCAAGTCGCACAACGACTATGACCAGGTCCTCGGCAACTCTGGTTTCAATACCAACGCCGACGGCGAGCAGAACCTG
SST-22	Pseudomonas aeruginosa PAK;Pseudomonas aeruginosa H17;Pseudomonas aeruginosa LS.2c;Pseudomonas aeruginosa UNC_PaerCF41;Pseudomonas aeruginosa YY322;Pseudomonas aeruginosa S-1;Pseudomonas aeruginosa PAM68;Pseudomonas aeruginosa PAS6;Pseudomonas aeruginosa PAG7;Pseudomonas aeruginosa mPA08-31;Pseudomonas aeruginosa JNQH-PA57;Pseudomonas aeruginosa DVT421;Pseudomonas aeruginosa PAC6;Pseudomonas aeru…	GCCAAGCCGTTCTTCTCCGCCGGTTACGGCACCCATCAGACCCTGGAGGGTAGCGCCGGGGTCAGCGGCGGCGCCGGCAACGGCTGGTACAGCCTCGGGGTGAGCAGCTTCGATACGGCGGGGATCAATACCAAGCGCGCCGGTACTGCGGGCTATGAGCCAGACCGCGACGGCTACCGCAACCTGTCCGGCAACCTGCGCGGCGGCTATCGCTTCGACAATGGCCTGGAACTCGACGGCACCCTGCTCAGGGCCAAGTCGCACAACGACTATGACCAGGTCTTCGGCAACTCCGGTTTCAATGCCAACGCCGACGGCGAGCAGAACCTG
SST-23	Pseudomonas aeruginosa MINF_3A-sc-2280432;Pseudomonas aeruginosa ZBX-P13;Pseudomonas aeruginosa B17932;Pseudomonas aeruginosa B17416;Pseudomonas aeruginosa PA179;Pseudomonas aeruginosa GIMC5034:PA52Ts32;Pseudomonas aeruginosa GIMC5021:PA52Ts17;Pseudomonas aeruginosa GIMC5020:PA52Ts2;Pseudomonas aeruginosa GIMC5019:PA52Ts1;Pseudomonas aeruginosa GIMC5016:PA1840;Pseudomonas aeruginosa SP4527;Pseudo…	GCCAAGCCGTTCTTCTCCGCCGGCTACGGCACCCATCAGACCCTGGAGGGTAGCGCCGGGGTCAGCGGCGGCGCCGGCAACGGCTGGTACAGCCTCGGGGTGAGCAGCTTCGATACGGCGGGGATCAATACCAAGCGCGCCGGTACTGCGGGCTATGAGCCAGACCGCGACGGCTACCGCAACCTGTCCGGCAACCTGCGCGGCGGCTATCGCTTCGACAATGGCCTGGAACTCGACGGCACCCTGCTCAGGGCCAAGTCGCACAACGACTATGACCAGGTCTTCGGCAACTCCGGTTTCAATACCAACGCCGACGGCGAGCAGAACCTG
SST-24	Pseudomonas aeruginosa PcyII-40, PcyII-40;Pseudomonas aeruginosa paerg009;Pseudomonas aeruginosa paerg005;Pseudomonas aeruginosa Pa127;Pseudomonas aeruginosa Pa124	GCCAAGCCGTTCTTCTCCGCCGGCTACGGCACCCATCAGACCCTGGAGGGCAGCGCCGGGGTCAGCGGCGGCGCTGGCAACGGCTGGTACAGCCTCGGGGTGAGCAGTTTCGATACGGCGGGGATCAATACCAAGCGCGCCGGTACTGCGGGCTATGAGCCAGACCGCGACGGCTACCGCAACCTGTCCGGCAACCTGCGCGGCGGCTATCGCTTCGACAATGGCCTGGAACTCGACGGCACCCTGCTCAGGGCCAAGTCGCACAACGACTATGACCAGGTCTTCGGCAACTCCGGTTTCAATGCCAACGCCGACGGCGAGCAGAACCTG
SST-25	Pseudomonas aeruginosa PA1609	GCCAAGCCGTTCTTCTCCGCCGGTTACGGCACCCATCAGACCCTGGAGGGCAGCGCCGGGGTCAGCGGCGGCGCCGGCAACGGCTGGTACAGCCTAGGGGTGAGCAGCTTCGATACGGCAGGCATCAATACCAAGCGCGCCGGTACTGCGGGCTATGAGCCGGACCGCGACGGCTACCGCAACCTGTCCGGTAACCTGCGCGGCGGCTATCGCTTCGACAATGGCCTGGAACTCGACGGCACGCTGCTCAGGGCCAAGTCGCACAACGACTATGACCAGGTTTTCGGCAACTCCGGTTTCAATGCCAACGCCGACGGCGAGCAGAACCTG
SST-26	Pseudomonas aeruginosa H06;Pseudomonas aeruginosa ISS SRV-K;Pseudomonas aeruginosa DVT417	GCCAAGCCGTTCTTCTCCGCCGGTTACGGCACCCATCAGACCCTGGAGGGCAGCGCCGGGGTCAGCGGCGGCGCCGGCAACGGCTGGTACAGCCTCGGGGTGAGCAGCTTCGATACGGCGGGGATCAATACCAAGCGCGCCGGTACTGCGGGCTATGAGCCAGACCGAGACGGCTACCGCAACCTGTCCGGCAACCTGCGCGGCGGCTATCGCTTCGACAATGGCCTGGAACTCGACGGCACGCTGCTCAGGGCCAAGTCGCACAACGACTATGACCAGGTTTTCGGCAACTCCGGTTTCAATGCCAACGCCGACGGCGAGCAGAACCTG
SST-27	Pseudomonas aeruginosa PA790;Pseudomonas aeruginosa PSE6684;Pseudomonas aeruginosa ST773;Pseudomonas aeruginosa 60503;Pseudomonas aeruginosa NCTC13715	GCCAAGCCGTTCTTCTCCGCCGGTTACGGCACCCATCAGACCCTGGAGGGCAGCGCCGGGGTCAGCGGCGGCGCTGGCAACGGCTGGTACAGCCTCGGGGTGAGCAGTTTCGATACGGCGGGGATCAACACCAAGCGCGCCGGTACTGCGGGCTATGAGCCAGACCGAGACGGCTACCGCAACCTGTCCGGCAACCTGCGCGGCGGCTATCGCTTCGACAATGGCCTGGAACTCGACGGCACCCTGCTCAGGGCCAAGTCGCACAACGACTATGACCAGGTTTTCGGCAACTCTGGTTTCAATACCAACGCCGACGGCGAGCAGAACCTG
SST-28	Pseudomonas aeruginosa PcyII-10	GCCAAGCCGTTCTTCTCCGCCGGTTACGGCACCCATCACACCCTGGAGGGTAGCGCCGGGGTCAGCGGCGGCGCTGGCAACGGCTGGTACAGCCTCGGGGTGAGCAGCTTCGATACGGCAGGCATCAATACCAAGCGCGCCGGTACTGCGGGCTATGAGCCGGACCGCGACGGCTACCGCAACCTGTCCGGTAACCTGCGCGGCGGCTATCGCTTCGACAATGGCCTGGAACTCGACGGCACGCTGCTCAGGGCCAAGTCGCACAACGACTATGACCAGGTCCTCGGCAACTCTGGTTTCAATACCAACGCCGACGGCGAGCAGAACCTG
SST-29	Pseudomonas aeruginosa VA-134;Pseudomonas aeruginosa T52373	GCCAAGCCGTTCTTCTCCGCCGGTTACGGCACCCATCAGACCCTGGAGGGTAGCGCCGGGGTCAGCGGCGGCGCTGGCAACGGCTGGTACAGCCTCGGGGTGAGCAGCTTCGATACGGCAGGCATCAATACCAAGCGCGCCGGTACTGCGGGCTATGAGCCGGACCGCGACGGCTACCGCAACCTGTCCGGCAACCTGCGCGGCGGCTATCGCTTCGACAATGGCCTGGAACTCGACGGCACGCTGCTCAGGGCCAAGTCGCACAACGACTATGACCAGGTCCTCGGCAACTCTGGTTTCAATACCAACGCCGACGGCGAGCAGAACCTG
SST-30	Pseudomonas aeruginosa CI27;Pseudomonas aeruginosa US449;Pseudomonas aeruginosa AR19438;Pseudomonas aeruginosa ST167_d57blood;Pseudomonas aeruginosa ST167_d26burn;Pseudomonas aeruginosa ST167_d67burn2;Pseudomonas aeruginosa ST167_d68blood1;Pseudomonas aeruginosa ST167_d67burn1;Pseudomonas aeruginosa ST167_d68blood2;Pseudomonas aeruginosa H02;Pseudomonas aeruginosa PA0523;Pseudomonas aeruginosa UN…	GCCAAGCCGTTCTTCTCCGCCGGTTACGGCACCCATCAGACCCTGGAGGGCAGCGCCGGGGTCAGCGGCGGCGCTGGCAACGGCTGGTACAGCCTCGGGGTGAGCAGTTTCGATACGGCGGGGATCAACACCAAGCGCGCCGGTACTGCGGGCTATGAGCCAGACCGAGACGGCTACCGCAACCTGTCCGGCAACCTGCGCGGCGGCTATCGCTTCGACAATGGCCTGGAACTCGACGGCACCCTGCTCAGGGCCAAGTCGCACAACGACTATGACCAGGTCTTCGGCAACTCCGGTTTCAATGCCAACGCCGACGGCGAGCAGAACCTG
SST-31	Pseudomonas aeruginosa MINF_7A-sc-2280434;Pseudomonas aeruginosa A17CT;Pseudomonas aeruginosa P16CT	GCCAAGCCGTTCTTCTCCGCCGGTTACGGCACCCATCACACCCTGGAGGGCAGCGCCGGGGTCAGCGGCGGCGCTGGCAACGGCTGGTACAGCCTCGGGGTGAGCAGTTTCGATACGGCGGGGATCAACACCAAGCGCGCCAGTACTGCGGGCTATGAGCCAGACCGAGACGGCTACCGCAACCTGTCCGGCAACCTGCGCGGCGGCTATCGCTTCGACAATGGCCTGGAACTCGACGGCACGCTGCTCAGGGCCAAGTCGCACAACGACTATGACCAGGTTTTCGGCAACTCTGGTTTCAATACCAACGCCGACGGCGAGCAGAACCTG
SST-32	Pseudomonas aeruginosa JNQH-PA033	GCCAAGCCGTTCTTCTCCGCCGGTTACGGCACCCATCAGACCCTGGAGGGCAGCGCCGGGGTCAGCGGCGGCGCTGGCAACGGCTGGTACAGCCTCGGGGTGAGCAGTTTCGATACGGCGGGGATCAACACCAAGCGCGCCGGTACTGTGGGCTATGAGCCAGACCGCGACGGCTACCGCAACCTGTCCGGCAACCTGCGCGGCGGCTATCGCTTCGACAATGGCCTGGAACTCGACGGCACCCTGCTCAGGGCCAAGTCGCACAACGACTATGACCAGGTCTTCGGCAACTCCGGTTTCAATGCCAACGCCGACGGCGAGCAGAACCTG
SST-33	Pseudomonas aeruginosa LYSZa7	GCCAAGCCGTTCTTCTCCGCCGGTTACGGCACCCATCAGACCCTGGAGGGTAGCGCCGGGGTCAGCGGCGGCGCTGGCAACGGCTGGTACAGCCTCGGGGTGAGCAGTTTCGATACGGCGGGGATCAATACCAAGCGCGCCGGTACTGCGGGCTATGAGCCAGACCGCGACGGCTACCGCAACCTGTCCGGCAACCTGCGCGGCGGCTATCGCTTCGACAATGGCCTGGAACTCGACGGTACCCTGCTCAGGGCCAAGTCGCACAACGACTATGACCAGGTCTTCGGCAACTCTGGTTTCAATACCAACGCCGACGGCGAGCAGAACCTG
SST-34	Pseudomonas aeruginosa PABCH05	GCCAAGCCGTTCTTCTCCGCCGGTTACGGCACCCATCAGACCCTGGAGGGCAGCGCCGGGGTCAGCGGCGGCGCCGGCAACGGCTGGTACAGCCTCGGGGTGAGCAGCTTCGATACGGCGGGGATCAATACCAAGCGCGCCGGTACTGCGGGCTATGAGCCAGACCGCGACGGCTACCGCAACCTGTCCGGCAACCTGCGCGGCGGCTATCGCTTCGACAATGGCCTGGAACTCGACGGCACCCTGCTCAGGGCCAAGTCGCACAACGACTATGACCAGGTCTTCGGCAACTCCGGTTTCAATGCCAACGCCGACGGCGAGCAGAACCTG
SST-35	Pseudomonas aeruginosa A5803;Pseudomonas aeruginosa H08;Pseudomonas aeruginosa H16;Pseudomonas aeruginosa KC-Tt-1;Pseudomonas aeruginosa JB2;Pseudomonas aeruginosa PPF-1;Pseudomonas aeruginosa IOMTU 133;Pseudomonas aeruginosa DK2	GCCAAGCCGTTCTTCTCCGCCGGTTACGGCACCCATCAGACCCTGGAGGGCAGCGCCGGGGTCAGCGGCGGCGCCGGCAACGGCTGGTACAGCCTCGGGGTGAGCAGTTTCGATACGGCGGGGATCAACACCAAGCGCGCCGGTACTGCGGGCTATGAGCCAGACCGAGACGGCTACCGCAACCTGTCCGGCAACCTGCGCGGCGGCTATCGCTTCGACAATGGCCTGGAACTCGACGGCACCCTGCTCAGGGCCAAGTCGCACAACGACTATGACCAGGTCTTCGGCAACTCCGGTTTCAATGCCAACGCCGACGGCGAGCAGAACCTG
SST-36	Pseudomonas aeruginosa ZS-PA-05;Pseudomonas aeruginosa TJ2014-049;Pseudomonas aeruginosa PABCH10	GCCAAGCCGTTCTTCTCCGCCGGTTACGGCACCCATCAGACCCTGGAGGGTAGCGCCGGGGTCAGCGGCGGCGCCGGCAACGGCTGGTACAGCCTCGGGGTGAGCAGCTTCGATACGGCGGGGATCAATACCAAGCGCGCCGGTACTGCGGGCTATGAGCCAGACCGCGACGGCTACCGCAACCTGTCCGGCAACCTGCGCGGCGGCTATCGCTTCGACAATGGCCTGGAACTCGACGGTACCCTGCTGAGGGCCAAGTCGCACAACGACTATGACCAGGTCTTCGGCAACTCCGGTTTCAATGCCAACGCCGACGGCGAGCAGAACCTG
SST-37	Pseudomonas aeruginosa QZPH41;Pseudomonas aeruginosa PB354;Pseudomonas aeruginosa PB353	GCCAAGCCGTTCTTCTCCGCCGGCTACGGCACCCATCAGACCCTGGAGGGCAGCGCCGGGGTCAGCGGCGGCGCCGGCAACGGCTGGTACAGCCTCGGGGTGAGCAGCTTCGATACGGCGGGGATCAACACCAAGCGCGCCGGTACTGCGGGCTATGAGCCAGACCGAGACGGCTACCGCAACCTGTCCGGCAACCTGCGCGGCGGCTATCGCTTCGACAATGGCCTGGAACTCGACGGCACCCTGGTCAGGGCCAAGTCGCACAACGACTATGACCAGGTCCTCGGCAACTCTGGTTTCAATACCAACGCCGACGGCGAGCAGAACCTG
SST-38	Pseudomonas aeruginosa TL1285;Pseudomonas aeruginosa ZBX-P11;Pseudomonas aeruginosa C79;Pseudomonas aeruginosa DN1;Pseudomonas aeruginosa Ocean-1175;Pseudomonas aeruginosa Ocean-1155	GCCAAGCCGTTCTTCTCCGCCGGCTACGGCACCCATCACACCCTGGAGGGCAGCGCCGGGGTCAGCGGCGGCGCCGGCAACGGCTGGTACAGCCTCGGGGTGAGCAGTTTCGATACGGCGGGGATCAATACCAAGCGCGCCGGTACTGCGGGCTATGAGCCAGACCGCGACGGCTACCGCAACCTGTCCGGCAACCTGCGCGGCGGCTATCGCTTCGACAATGGCCTGGAACTCGACGGCACCCTGCTCAGGGCCAAGTCGCACAACGACTATGACCAGGTCTTCGGCAACTCCGGTTTCAATGCCAACGCCGACGGCGAGCAGAACCTG
SST-39	Pseudomonas aeruginosa DVT425	GCCAAGCCGTTCTTCTCCGCCGGTTACGGCACCCATCAGACCCTGGAGGGCAGCGCCGGGGTCAGCGGCGGCGCCGGCAACGGCTGGTACAGCCTCGGGGTGAGCAGCTTCGATACGGCGGGGATCAACACCAAGCGCGCCGGTACTGCGGGCTATGAGCCAGACCGAGACGGCTACCGCAACCTGTCCGGCAACCTGCGCGGCGGCTATCGCTTCGACAATGGCCTGGAACTCGACGGTACCCTGCTCAGGGCCAAGTCGCACAACGACTATGACCAGGTCTTCGGCAACTCCGGTTTCAATGCCAACGCCGACGGCGAGCAGAACCTG
SST-40	Pseudomonas aeruginosa CMC-115	GCCAAGCCGTTCTTCTCCGCCGGCTACGGCACCCATCACACCCTGGAGGGCAGCGCCGGGGTCAGCGGCGGCGCCGGCAACGGCTGGTACAGCCTCGGGGTGAGCAGCTTCGACACGGCGGGGATCAATACCAAGCGCGCCGGTACCGTGGGCTACGAGCCGGACCGCGACGGCTATCGCAACCTGTCCGGCAACCTGCGCGGCGGCTATCGCTTCGACAATGGCCTGGAACTCGACGGCACCCTGCTGAGGGCCAAGTCGCACAACGACTATGACCAGGTCTTCGGCAACTCCGGTTTCAATGCCAACGCCGACGGCGAGCAGAACCTG
SST-41	Pseudomonas aeruginosa IMP-13	GCCAAGCCGTTCTTCTCCGCCGGTTACGGCACCCATCAGACCCTGGAGGGCAGCGCCGGGGTCAGCGGCGGCGCCGGCAACGGCTGGTACAGCCTCGGGGTGAGCAGCTTCGATACGGCGGGGATCAACACCAAGCGCGCCGGTACTGCGGGCTATGAGCCAGACCGAGACGGCTACCGCAACCTGTCCGGCAACCTGCGCGGCGGCTATCGCTTCGACAATGGCCTGGAACTCGACGGCACCCTGCTCAGGGCCAAGTCGCACAACGACTATGACCAGGTCCTCGGCAACTCTGGTTTCAATACCAACGCCGACGGCGAGCAGAACCTG
SST-42	Pseudomonas aeruginosa PA_154197	GCCAAGCCGTTCTTCTCCGCCGGTTACGGCACCCATCAGACCCTGGAGGGCAGCGCCGGGGTCAGCGGCGGCGCTGGCAACGGCTGGTACAGCCTCGGGGTGAGCAGTTTCGATACGGCGGGGATCAATACCAAGCGCGCCGGTACTGCGGGCTATGAGCCAGACCGCGACGGCTACCGCAACCTGTCCGGCAACCTGCGCGGCGGCTATCGCTTCGACAATGGCCTGGAACTCGACGGCACCCTGCTCAGGGCCAAGTCGCATAACGACTATGACCAGGTCTTCGGCAACTCCGGTTTCAATGCCAACGCCGACGGCGAGCAGAACCTG
SST-43	Pseudomonas aeruginosa AR_0230;Pseudomonas aeruginosa PA83;Pseudomonas aeruginosa W45909;Pseudomonas aeruginosa NHmuc;Pseudomonas aeruginosa SCVJan;Pseudomonas aeruginosa SCVFeb;Pseudomonas aeruginosa FA-HZ1;Pseudomonas aeruginosa T63266;Pseudomonas aeruginosa R20-14;Pseudomonas aeruginosa E167;Pseudomonas aeruginosa E131;Pseudomonas aeruginosa E104;Pseudomonas aeruginosa H10;Pseudomonas aerugino…	GCCAAGCCGTTCTTCTCCGCCGGTTACGGCACCCATCAGACCCTGGAGGGTAGCGCCGGGGTCAGCGGCGGCGCCGGCAACGGCTGGTACAGCCTCGGGGTGAGCAGCTTCGATACGGCGGGGATCAACACCAAGCGCGCCGGTACTGCGGGCTATGAGCCAGACCGAGACGGCTACCGCAACCTGTCCGGCAACCTGCGCGGCGGCTATCGCTTCGACAATGGCCTGGAACTCGACGGTACCCTGCTGAGGGCCAAGTCGCACAACAACTATGACCAGGTCTTCGGCAACTCCGGTTTCAATGCCAACGCCGACGGCGAGCAGAACCTG
SST-44	Pseudomonas aeruginosa CCUG 70744;Pseudomonas aeruginosa H47921;Pseudomonas aeruginosa C7447m;Pseudomonas aeruginosa PcyII-29, PcyII-29;Pseudomonas aeruginosa PA-2;Pseudomonas aeruginosa PA-1;Pseudomonas aeruginosa UNC_PaerCF25;Pseudomonas aeruginosa H04;Pseudomonas aeruginosa Pae1255-NDM1;Pseudomonas aeruginosa 152962;Pseudomonas aeruginosa NRD619;Pseudomonas aeruginosa DVT410;Pseudomonas aerugi…	GCCAAGCCGTTCTTCTCCGCCGGTTACGGCACCCATCAGACCCTGGAGGGCAGCGCCGGGGTCAGCGGCGGCGCCGGCAACGGCTGGTACAGCCTCGGGGTGAGCAGCTTCGATACGGCGGGGATCAACACCAAGCGCGCCGGTACTGCGGGCTATGAGCCAGACCGAGACGGCTACCGCAACCTGTCCGGCAACCTGCGCGGCGGCTATCGCTTCGACAATGGCCTGGAACTCGACGGCACCCTGGTCAGGGCCAAGTCGCACAACGACTATGACCAGGTCCTCGGCAACTCTGGTTTCAATACCAACGCCGACGGCGAGCAGAACCTG
SST-45	Pseudomonas aeruginosa PA1RG;Pseudomonas aeruginosa PA1;Pseudomonas aeruginosa PA1R;Pseudomonas aeruginosa UNC_PaerCF34	GCCAAGCCGTTCTTCTCCGCCGGTTACGGCACCCATCAGACCCTGGAGGGCAGCGCCGGGGTCAGCGGCGGCGCTGGCAACGGCTGGTACAGCCTCGGGGTGAGCAGCTTCGATACGGCGGGGATCAATACCAAGCGCGCCGGTACTGCGGGCTATGAGCCAGACCGAGACGGCTACCGCAACCTGTCCGGCAACCTGCGCGGCGGCTATCGCTTCGACAATGGCCTGGAACTCGACGGTACCCTGCTGAGGGCCAAGTCGCACAACGACTATGACCAGGTCTTCGGCAACTCCGGTTTCAATGCCAACGCCGACGGCGAGCAGAACCTG
SST-46	Pseudomonas aeruginosa F9676	GCCAAGCCGTTCTTCTCCGCCGGTTACGGCACCCATCAGACCCTGGAGGGCAGCGCCGGGGTCAGCGGCGGCGCTGGCAACGGCTGGTACAGCCTCGGGGTGAGCAGCTTCGATACGGCGGGGATCAACACCAAGCGCGCCGGTACTGCGGGCTATGAGCCAGACCGAGACGGCTACCGCAACCTGTCCGGCAACCTGCGCGGCGGCTATCGCTTCGACAATGGCCTGGAACTCGACGGTACCCTGGTCAGGGCCAAGTCGCACAACGACTATGACCAGGTCCTCGGCAACTCTGGTTTCAATACCAACGCCGACGGCGAGCAGAACCTG
SST-47	Pseudomonas aeruginosa B136-33;Pseudomonas aeruginosa ST1076_d100blood2;Pseudomonas aeruginosa ST1076_d97burn1;Pseudomonas aeruginosa ST1076_d97burn2;Pseudomonas aeruginosa ST1076_d100blood1;Pseudomonas aeruginosa ST1076_d118limb1;Pseudomonas aeruginosa St1076_d123blood;Pseudomonas aeruginosa H19;Pseudomonas aeruginosa PA8329;Pseudomonas aeruginosa DVT413;Pseudomonas aeruginosa CFSAN084950;Pseudo…	GCCAAGCCGTTCTTCTCCGCCGGTTACGGCACCCATCAGACCCTGGAGGGTAGCGCCGGGGTCAGCGGCGGCGCCGGCAACGGCTGGTACAGCCTCGGGGTGAGCAGCTTCGATACGGCGGGGATCAATACCAAGCGCGCCGGTACTGCGGGCTATGAGCCAGACCGAGACGGCTACCGCAACCTGTCCGGCAACCTGCGCGGCGGCTATCGCTTCGACAATGGCCTGGAACTCGACGGTACCCTGCTGAGGGCCAAGTCGCACAACGACTATGACCAGGTCTTCGGCAACTCCGGTTTCAATGCCAACGCCGACGGCGAGCAGAACCTG
SST-48	Pseudomonas aeruginosa SG17M;Pseudomonas aeruginosa E125;Pseudomonas aeruginosa DVT423;Pseudomonas aeruginosa NCTC13620;Pseudomonas aeruginosa H26027;Pseudomonas aeruginosa W36662;Pseudomonas aeruginosa early NN2	GCCAAGCCGTTCTTCTCCGCCGGTTACGGCACCCATCAGACCCTGGAGGGCAGCGCCGGGGTCAGCGGCGGCGCTGGCAACGGCTGGTACAGCCTCGGGGTGAGCAGTTTCGATACGGCGGGGATCAACACCAAGCGCGCCGGTACTGCGGGCTATGAGCCAGACCGAGACGGCTACCGCAACCTGTCCGGCAACCTGCGCGGCGGCTATCGCTTCGACAATGGCCTGGAACTCGACGGTACCCTGCTGAGGGCCAAGTCGCACAACGACTATGACCAGGTCTTCGGCAACTCCGGTTTCAATGCCAACGCCGACGGCGAGCAGAACCTG
SST-49	Pseudomonas aeruginosa P8W;Pseudomonas aeruginosa P9W;Pseudomonas aeruginosa SCAID WND3-2019	GCCAAGCCGTTCTTCTCCGCCGGTTACGGCACCCATCAGACCCTGGAGGGCAGCGCCGGGGTCAGCGGCGGCGCCGGCAACGGCTGGTACAGCCTCGGGGTGAGCAGCTTCGATACGGCGGGGATCAACACCAAGCGCGCCGGTACTGCGGGCTATGAGCCAGACCGAGACGGCTACCGCAACCTGTCCGGCAACCTGCGCGGCGGCTATCGCTTCGACAATGGCCTGGAACTCGACGGTACCCTGCTGAGGGCCAAGTCGCACAACGACTATGACCAGGTCTTCGGCAACTCCGGTTTCAATGCCAACGCCGACGGCGAGCAGAACCTG
SST-50	Pseudomonas aeruginosa DJ06;Pseudomonas aeruginosa ACR22;Pseudomonas aeruginosa ACR20;Pseudomonas aeruginosa B18	GCCAAGCCGTTCTTCTCCGCCGGTTACGGCACCCATCAGACCCTGGAGGGCAGCGCCGGGGTCAGCGGCGGCGCTGGCAACGGCTGGTACAGCCTCGGGGTGAGCAGTTTCGATACGGCGGGGATCAACACCAAGCGTGCCGGTACTGCCGGCTATGAGCCAGACCGAGACGGCTACCGCAACCTGTCCGGCAACCTGCGCGGCGGCTATCGCTTCGACAATGGCCTGGAACTCGACGGCACGCTGCTCAGGGCCAAGTCGCACAACGACTATGACCAGGTCCTCGGCAACTCTGGTTTCAATACCAACGCCGACGGCGAGCAGAACCTG
SST-51	Pseudomonas aeruginosa PABL017	GCCAAGCCGTTCTTCTCCGCCGGCTACGGCACCCATCAGACCCTGGAGGGCAGCGCCGGGGTCAGCGGCGGCGCCGGCAACGGCTGGTACAGCCTCGGGGTGAGCAGCTTCGATACGGCGGGGATCAATACCAAGCGCGCCGGTACTGCGGGCTATGAGCCAGACCGAGACGGCTACCGCAACCTGTCCGGCAACCTGCGCGGCGGCTATCGCTTCGACAATGGCCTGGAACTCGACGGTACCCTGCTGAGGGCCAAGTCGCACAACGACTATGACCAGGTCTTCGGCAACTCCGGTTTCAATGCCAACGCCGACGGCGAGCAGAACCTG
SST-52	Pseudomonas aeruginosa 12939	GCCAAGCCGTTCTTCTCCGCCGGTTACGGCACCCATCAGACCCTGGAGGGCAGCGCCGGGGTCAGCGGCGGCGCTGGCAACGGCTGGTACAGCCTCGGGGTGAGCAGTTTCGATACGGCGGGGATCAACACCAAGCGCGCCGGTACTGCGGGCTATGAGCCAGACCGAGACGGCTACCGCAACCTGTCCGGCAACCTGCGCGGCGGCTATCGCTTCGACAATGGCCTGGAACTCGACGGCACCCTGCTGAGGGCCAAGTCGCACAACGACTATGACCAGGTCTTCGGCAACTCCGGTTTCAATACCAACGCCGACGGCGAGCAGAACCTG
SST-53	Pseudomonas aeruginosa PAO1;Pseudomonas aeruginosa D-2;Pseudomonas aeruginosa PAO1-N;Pseudomonas aeruginosa PAO1-L;Pseudomonas aeruginosa PAO1_Mat-X-1;Pseudomonas aeruginosa PAO1_Kat-X-2;Pseudomonas aeruginosa PA1681;Pseudomonas aeruginosa CHA;Pseudomonas aeruginosa AA43;Pseudomonas aeruginosa PartH-Paeruginosa-RM8376;Pseudomonas aeruginosa NY4605;Pseudomonas aeruginosa H15;Pseudomonas aeruginosa…	GCCAAGCCGTTCTTCTCCGCCGGTTACGGCACCCATCAGACCCTGGAGGGCAGCGCCGGGGTCAGCGGCGGCGCCGGCAACGGCTGGTACAGCCTCGGGGTGAGCAGCTTCGATACGGCGGGGATCAATACCAAGCGCGCCGGTACTGCGGGCTATGAGCCAGACCGAGACGGCTACCGCAACCTGTCCGGCAACCTGCGCGGCGGCTATCGCTTCGACAATGGCCTGGAACTCGACGGTACCCTGCTGAGGGCCAAGTCGCACAACGACTATGACCAGGTCTTCGGCAACTCCGGTTTCAATGCCAACGCCGACGGCGAGCAGAACCTG
SST-54	Pseudomonas aeruginosa ZPPH1;Pseudomonas aeruginosa ZPPH2;Pseudomonas aeruginosa ZPPH33;Pseudomonas aeruginosa F092021;Pseudomonas aeruginosa PA3	GCCAAGCCGTTCTTCTCCGCCGGTTACGGCACCCATCAGACCCTGGAGGGCAGCGCCGGGGTCAGCGGCGGCGCCGGCAACGGCTGGTACAGCCTCGGGGTGAGCAGCTTCGATACGGCGGGGATCAATACCAAGCGCGCCGGTACTGCGGGCTATGAGCCAGACCGAGACGGCTACCGCAACCTGTCCGGCAACCTGCGCGGCGGCTATCGCTTCGACAATGGCCTGGAACTCGACGGCACCCTGGTCAGGGCCAAGTCGCACAACGACTATGACCAGGTCCTCGGCAACTCTGGTTTCAATACCAACGCCGACGGCGAGCAGAACCTG
SST-55	Pseudomonas aeruginosa UNC_PaerCF20;Pseudomonas aeruginosa FDAARGOS_1041;Pseudomonas aeruginosa SE5369;Pseudomonas aeruginosa PABCH01;Pseudomonas aeruginosa PABCH42;Pseudomonas aeruginosa PABCH14;Pseudomonas aeruginosa PAAK095;Pseudomonas aeruginosa NCTC12903;Pseudomonas aeruginosa FDAARGOS_505;Pseudomonas aeruginosa FDAARGOS_532;Pseudomonas aeruginosa ATCC 27853;Pseudomonas aeruginosa T38079;Pse…	GCCAAGCCGTTCTTCTCCGCCGGTTACGGCACCCATCAGACCCTGGAGGGCAGCGCCGGGGTCAGCGGCGGCGCCGGCAACGGCTGGTACAGCCTCGGGGTGAGCAGCTTCGATACGGCGGGGATCAACACCAAGCGCGCCGGTACTGCGGGCTATGAGCCAGACCGAGACGGCTACCGCAACCTGTCCGGCAACCTGCGCGGCGGCTATCGCTTCGACAATGGCCTGGAACTCGACGGTACCCTGGTCAGGGCCAAGTCGCACAACGACTATGACCAGGTCCTCGGCAACTCTGGTTTCAATACCAACGCCGACGGCGAGCAGAACCTG
SST-56	Pseudomonas aeruginosa PAO1H2O	GCCAAGCCGTTCTTCTCCGCCGGTTACGGCACCCATCAGACCCTGGAGGGCAGCGCCGGGGTCAGCGGCGGCGCCGGCAACGGCTGGTACAGCCTCGGGGTGAGCAGCTTCGATACGGCGGGGATCAANACCAAGCGCGCCGGTACTGCGGGCTATGAGCCAGACCGAGACGGCTACCGCAACCTGTCCGGCAACCTGCGCGGCGGCTATCGCTTCGACAATGGCCTGGAACTCGACGGTACCCTGCTGAGGGCCAAGTCGCACAACGACTATGACCAGGTCNTCGGCAACTCNGGTTTCAATNCCAACGCCGACGGCGAGCAGAACCTG
SST-57	Pseudomonas aeruginosa PA1_NCHU;Pseudomonas aeruginosa M8A1	GCCAAGCCGTTCTTCTCCGCCGGTTACGGCACCCATCACACCCTGGAGGGCAGCGCCGGGGTCAGCGGCGGCGCTGGCAACGGCTGGTACAGCCTCGGGGTGAGCAGTTTCGATACGGCGGGGATCAACACCAAGCGCGCCGGTACTGCGGGCTATGAGCCAGACCGAGACGGTTACCGCAACCTGTCCGGCAACCTGCGCGGCGGCTATCGCTTCGACAATGGCCTGGAACTCGACGGCACCCTGGTCAGGGCCAAGTCGCACAACGACTATGACCAGGTCCTCGGCAACTCTGGTTTCAATACCAACGCCGACGGCGAGCAGAACCTG
SST-58	Pseudomonas aeruginosa HU20;Pseudomonas aeruginosa YTSEY8;Pseudomonas aeruginosa DVT427;Pseudomonas aeruginosa YT12746;Pseudomonas aeruginosa INP-43;Pseudomonas aeruginosa PA-VAP-2;Pseudomonas aeruginosa SCV20265	GCCAAGCCGTTCTTCTCCGCCGGTTACGGCACCCATCAGACCCTGGAGGGCAGCGCCGGGGTCAGCGGCGGCGCCGGCAACGGCTGGTACAGCCTCGGGGTGAGCAGCTTCGATACGGCGGGGATCAATACCAAGCGCGCCGGTACTGCGGGCTATGAGCCAGACCGAGACGGCTACCGCAACCTGTCCGGCAACCTGCGCGGCGGCTATCGCTTCGACAATGGCCTGGAACTCGACGGTACCCTGCTGAGGGCCAAGTCGCACAACGACTATGACCAGGTCTTCGGCAACTCCGGTGTCAATGCCAACGCCGACGGCGAGCAGAACCTG
SST-59	Pseudomonas aeruginosa UNC_PaerCF14	GCCAAGCCGTTCTTCTCCGCCGGTTACGGCACCCATCAGACCCTGGAGGGCAGCGCCGGGGTCAGCGGCGGCGCCGGCAACGGCTGGTACAGCCTCGGGGTGAGCAGCTTCGATACGGCGGGGATCAATACCAAGCGCGCCGGTACTGCGGGCTATGAGCCAGACCGAGACGGCTACCGCAACCTGTCCGGCAACCTGCGCGGCGGCTATCGCTTCGACAATGGCCTGGAACTCGACGGTACCCTGCTGAAGGCCAAGTCGCACAACGACTATGACCAGGTCTTCGGCAACTCCGGTTTCAATGCCAACGCCGACGGCGAGCAGAACCTG
SST-60	Pseudomonas aeruginosa H27930	GCCAAGCCGTTCTTCTCCGCCGGTTACGGCACCCATCAGACCCTGGAGGGCAGCGCCGGGGTCAGCGGCGGCGCTGGCAACGGCTGGTACAGCCTCGGGGTGAGCAGTTTCGATACGGCGGGGATCAACACCAAGCGTGCCGGTACTGCCGGCTATGAGCCAGACCGAGACGGCTACCGCAACCTGTCCGGCAACCTGCGCGGCGGCTATCGCTTCGACAATGGCCTGGAACTCGACGGCACCCTGGTCAGGGCCAAGTCGCACAACGACTATGACCAGGTCCTCGGCAACTCTGGTTTCAATACCAACGCCGACGGCGAGCAGAACCTG
SST-61	Pseudomonas aeruginosa Y31	GCCAAGCCGTTCTTCTCCGCCGGTTACGGCACCCATCAGACCCTGGAGGGCAGCGCCGGGGTCAGCGGCGGCGCCGGCAACGGCTGGTACAGCCTCGGGGTGAGCAGCTTCGATACGGCGGGGATCAATACCAAGCGCGCCGGTACTGCGGGCTATGAGCCAGACCGAGACGGCTACCGCAACCTGTCCGGCAACCTGCGCGGCGGCTATCGCTTCGACAATGGCCTGGAACTCGACGGTACCCTGGTCAGGGCCAAGTCGCACAACGACTATGACCAGGTCCTCGGCAACTCTGGTTTCAATACCAACGCCGACGGCGAGCAGAACCTG
SST-62	Pseudomonas aeruginosa CMC-097;Pseudomonas aeruginosa PABCH45;Pseudomonas aeruginosa DVT414;Pseudomonas aeruginosa E90;Pseudomonas aeruginosa W60856;Pseudomonas aeruginosa PA96;Pseudomonas aeruginosa PA121617;Pseudomonas aeruginosa YL84	GCCAAGCCGTTCTTCTCCGCCGGTTACGGCACCCATCACACCCTGGAGGGCAGCGCCGGGGTCAGCGGCGGCGCTGGCAACGGCTGGTACAGCCTCGGGGTGAGCAGTTTCGATACGGCGGGGATCAACACCAAGCGTGCCGGTACTGCCGGCTATGAGCCAGACCGAGACGGCTACCGCAACCTGTCCGGCAACCTGCGCGGCGGCTATCGCTTCGACAATGGCCTGGAACTCGACGGCACCCTGGTCAGGGCCAAGTCGCACAACGACTATGACCAGGTCCTCGGCAACTCTGGTTTCAATACCAACGCCGACGGCGAGCAGAACCTG
SST-63	Pseudomonas aeruginosa ZBX-P23	GCCAAGCCGTTCTTCTCCGCCGGTTACGGCACCCATCAGACCCTGGAGGGTAGCGCCGGGGTCAGCGGCGGCGCCGGCAACGGCTGGTACAGCCTCGGGGTGAGCAGCTTCGATACGGCGGGGATCAACACCAAGCGCGCCGGTACTGCGGGCTATGAGCCAGACCGAGACGGCTACCGCAACCTGTCCGGCAACCTGCGCGGCGGCTATCGCTTCG-----------GAACTCGACGGTACCCTGCTGAGGGCCAAGTCGCACAACAACTATGACCAGGTCTTCGGCAACTCCGGTTTCAATGCCAACGCCGACGGCGAGCAGAACCTG

## Sheet: Sheet3. bvgS database
SST-bvgS	Strains	Sequences
SST-1	Pseudomonas aeruginosa 12-4-4(59)	ACGGCGACGAACTGTTGCGCAGCTGGAGCGCCGGGCGGCGCCTGCGCTTCGACGAGCCCCGGGTGACGCTGTCGCCGGCGGAGCAGCGTTGGCTCTCCGCGCACCCGGTCGTGCCGGTGGTGATCAACCATTCCCTTGGCGCGCTCGGGCAACTGGATAACGAGGGGAGGCTGAGTGGTATCGGGCGTGACTATCTGGACCTGATCGGCAAGCGCAGTGGCCTGCAGTTTTCCTTCACTGGAGCACGGAACTTCGTCGAGACGAAAAGCCGACTGGATGCGGGGGAGGCATTGGTTACGCCGACCATGCC
SST-2	Pseudomonas aeruginosa F13;Pseudomonas aeruginosa ATCC BAA-2108;Pseudomonas aeruginosa H07;Pseudomonas aeruginosa PES_P749;Pseudomonas aeruginosa ZPPH29;Pseudomonas aeruginosa PAAK088;Pseudomonas aeruginosa SCAID PHRX1-2019;Pseudomonas aeruginosa SCAID WND1-2019;Pseudomonas aeruginosa A681;Pseudomonas aeruginosa AR_458;Pseudomonas aeruginosa M8A4;Pseudomonas aeruginosa RP73;Pseudomonas aeruginosa…	ACGGCGACGAACTGTTGCGCAGCTGGAGCGCCGGGCGGCGCCTGCGCTTCGACGAGCCCCGGGTGACGCTGTCGCCGGCGGAGCAGCGTTGGCTCTCCGCGCACCCGGTCGTGCCGGTGGTGATCAACCATTCCCTTGGCGCGCTCGGGCAACTGGATAACGAGGGGAGGCTGAGTGGTATCGGGCGTGACTATCTGGACCTGATCGGCAAGCGCAGTGGCCTGCAGTTTTCCTTCACTGGAGCACGCAACTTCGTCGAGACGAAAAGCCGACTGGATGCGGGGGAGGCATTGGTTACGCCGACCATGCC
SST-3	Pseudomonas aeruginosa 34Pae36;Pseudomonas aeruginosa HB2011305RE;Pseudomonas aeruginosa DL201330;Pseudomonas aeruginosa A-I-1;Pseudomonas aeruginosa AG1;Pseudomonas aeruginosa PA38182;Pseudomonas aeruginosa Y82;Pseudomonas aeruginosa RW109;Pseudomonas aeruginosa F5677;Pseudomonas aeruginosa AR445;Pseudomonas aeruginosa RIVM-EMC2982;Pseudomonas aeruginosa F30658;Pseudomonas aeruginosa Carb01 63;P…	ACGGCGACGAACTGTTGCGCAGCTGGAGCGCCGGGAGGCGCCTGCGCTTCGACGATCCCCGGGTGACGCTGTCGCCGGCGGAACAGCGTTGGCTCTCCGCGCACCCGGTCGTGCCGGTGGTGATCAACCATTCCCTTGGCGCGCTCGGGCAACTGGATAACGAGGGGAGGCTGAGTGGTATCGGGCGTGACTATCTGGACCTGATCGGCAAGCGCAGTGGCCTGCAGTTTTCCTTCACTGGAGCACGCAACTTCGTCGAGACGAAAAGCCGACTGGATGCGGGGGAGGCATTGGTTACGCCGACCATGCC
SST-4	Pseudomonas aeruginosa A0002;Pseudomonas aeruginosa PDNC003;Pseudomonas aeruginosa F23197;Pseudomonas aeruginosa Pa12;Pseudomonas aeruginosa AR19583;Pseudomonas aeruginosa AR19640;Pseudomonas aeruginosa SE5452;Pseudomonas aeruginosa Pa608;Pseudomonas aeruginosa PABCH09;Pseudomonas aeruginosa paerg012;Pseudomonas aeruginosa paerg011;Pseudomonas aeruginosa paerg010;Pseudomonas aeruginosa paerg003;P…	ACGGCGACGAACTGTTGCGCAGCTGGAGCGCCGGGAGGCGCCTGCGCTTCGACGATCCCCGGGTGACGCTGTCGCCGGCGGAACAGCGTTGGCTCTCCGCGCACCCGGTCGTGCCGGTGGTGATCAACCATTCCCTTGGCGCGCTCGGACAAGTGGACAGCGAGGGGAAGCTGAGCGGTATCGGGCGTGATTACCTGGAACTGATCGGTAAGCGCAGTGGCCTGCGGTTTTCCTTCACTGGAGCACGCAACTTCGTCGAGACGAAAAGTCGACTGGATGCGGAGGAGGCACTGGTTACGCCGACCATGCC
SST-5	Pseudomonas aeruginosa P93127;Pseudomonas aeruginosa P4970C;Pseudomonas aeruginosa FAHZU40;Pseudomonas aeruginosa AJ D 2;Pseudomonas aeruginosa 1334/14;Pseudomonas aeruginosa 97;Pseudomonas aeruginosa PA-2;Pseudomonas aeruginosa PA-1;Pseudomonas aeruginosa Pae1255-NDM1;Pseudomonas aeruginosa 152962;Pseudomonas aeruginosa SCAID WND2-2019;Pseudomonas aeruginosa N15-01092;Pseudomonas aeruginosa ZPPH…	ACGGCGACGAACTGTTGCGCAGCTGGAGCGCCGGGCGGCGCCTGCGCTTCGACGAGCCCCGGGTGACGCTGTCGCCGGCGGAACAGCGTTGGCTCTCCGCGCACCCGGTCGTGCCGGTGGTGATCAACCATTCCCTTGGCGCGCTCGGACAAGTGGACAGCGAGGGGAAGCTGAGCGGTATCGGGCGTGATTACCTGGAACTGATCGGTAAGCGCAGTGGCCTGCGGTTTTCCTTCACTGGAGCACGCAACTTCGTCGAGACGAAAAGTCGACTGGATGCGGAGGAGGCACTGGTTACGCCGACCATGCC
SST-6	Pseudomonas aeruginosa SE5419;Pseudomonas aeruginosa SE5416;Pseudomonas aeruginosa PA1681	ACGGCGACGAACTGTTGCGCAGCTGGAGCGCCGGGAGGCGCCTGCGCTTCGACGATCCCCGGGTGACGCTGTCGCCGGCGGAACAGCGTTGGCTCTCCGCGCACCCGGTCGTGCCGGTGGTGATCAACCATTCCCTTGGCGCGCTCGGGCAACTGGATAACGAGGGGAGGCTGAGTGGTATCGGGCGTGACTATCTGGACCTGATCGGCAAGCGCAGTGGCCTGCAGTTTTCCTTCACTGGAGCACGCAACTTCGTCGAGACGAAAAGTCGACTGGATGCGGAGGAGGCACTGGTTACGCCGACCATGCC
SST-7	Pseudomonas aeruginosa C-I-1;Pseudomonas aeruginosa DVT779;Pseudomonas aeruginosa NRD619;Pseudomonas aeruginosa PARM801;Pseudomonas aeruginosa N17-1;Pseudomonas aeruginosa M8A1	ACGGCGACGAACTGTTGCGCAGCTGGAGCGCCGGGCGGCGCCTGCGCTTCGATGAGCCCCGGGTGACGCTGTCGCCGGCGGAGCAGCGTTGGCTCTCCGCGCACCCGGTCGTGCCGGTGGTGATCAACCATTCCCTTGGCGCGCTCGGACAAGTGGACAGCGAGGGGAAGCTGAGCGGTATCGGGCGTGATTACCTGGAACTGATCGGTAAGCGCAGTGGCCTGCGGTTTTCCTTCACTGGAGCACGCAACTTCGTCGAGACGAAAAGTCGACTGGATGCGGAGGAGGCACTGGTTACGCCGACCATGCC
SST-8	Pseudomonas aeruginosa YB01;Pseudomonas aeruginosa NCTC10728;Pseudomonas aeruginosa G-I-1;Pseudomonas aeruginosa PAO1;Pseudomonas aeruginosa PAO1-N;Pseudomonas aeruginosa PAO1-L;Pseudomonas aeruginosa PAO1_Mat-X-1;Pseudomonas aeruginosa PAO1_Kat-X-2;Pseudomonas aeruginosa PartH-Paeruginosa-RM8376;Pseudomonas aeruginosa MIN-155;Pseudomonas aeruginosa MPAO1;Pseudomonas aeruginosa A17PBS;Pseudomonas…	ACGGCGACGAACTGTTGCGCAGCTGGAGCGCCGGGCGGCGCCTGCGCTTCGACGAGCCCCGGGTGACGCTGTCGCCGGCGGAGCAGCGTTGGCTCTCCGCGCACCCGGTCGTGCCGGTGGTGATCAACCATTCCCTTGGCGCGCTCGGGCAACTGGATAACGAGGGGAGGCTGAGTGGTATCGGGCGTGACTATCTGGACCTGATCGGCAAGCGCAGTGGCCTGCGGTTTTCCTTCACTGGAGCACGGAACTTCGTCGAGACGAAAAGTCGACTGGATGCGGAGGAGGCACTGGTTACGCCGACCATGCC
SST-9	Pseudomonas aeruginosa F63912	ACGGCGACGAACTGTTGCGCAGCTGGAGCGCCGGGCGGCGCCTGCGCTTCGACGAGCCCCGGGTGACGCTGTCGCCGGCGGAGCAGCGTTGGCTCTCCGCGCACCCGGTCGTGCCGGTGGTGATCAACCATTCCCTTGGCGCGCTCGGGCAACTGGATAACGAGGGGAGGCTGAGTGGTATCGGGCGTGACTATCTGGACCTGATCGGCAAGCGCAGTGGCCTGCAGTTTTCCTTCACTGGAGCACGCAACTTCGTCGAGACGAAAAGCCGACTGGATGCGGGG-AGGCATTGGTTACGCCGACCATGCC
SST-10	Pseudomonas aeruginosa C7-25, C7-25;Pseudomonas aeruginosa 8D;Pseudomonas aeruginosa PA1616;Pseudomonas aeruginosa H11;Pseudomonas aeruginosa E01;Pseudomonas aeruginosa E02;Pseudomonas aeruginosa E03;Pseudomonas aeruginosa R01;Pseudomonas aeruginosa R08;Pseudomonas aeruginosa R09;Pseudomonas aeruginosa R07;Pseudomonas aeruginosa R10;Pseudomonas aeruginosa R03;Pseudomonas aeruginosa R04;Pseudomona…	ACGGCGACGAACTGTTGCGCAGCTGGAGCGCCGGGCGGCGCCTGCGCTTCGACGAGCCCCGGGTGACGCTGTCGCCGGCGGAGCAGCGTTGGCTCTCCGCGCACCCGGTCGTGCCGGTGGTGATCAACCATTCCCTTGGCGCGCTCGGGCAACTGGATAACGAGGGGAGGCTGAGTGGTATCGGGCGTGACTATCTGGACCTGATCGGCAAGCGCAGTGGCCTGCGGTTTTCCTTCACTGGAGCACGCAACTTCGTCGAGACGAAAAGTCGACTGGATGCGGAGGAGGCACTGGTTACGCCGACCATGCC
SST-11	Pseudomonas aeruginosa E113	ACGGCGACGAACTGTTGCGCAGCTGGAGCGCCGGGCGGCGCCTGCGCTTCGACGAGCCCCGGGTGACGCTGTCGCCGGCGGAACAGCGTTGGCTCTCCGCGCACCCGGTCGTGCCGGTGGTGATCAACCATTCCCTTGGCGCGCTCGGGCAACTGGATAACGAGGGGAGGCTGAGTGGTATCGGGCGTGACTATCTGGACCTGATCGGCAAGCCCAGTGGCCTGCAGTTTTCCTTCACTGGAGCACGCAACTTCGTCGAGACGAAAAGCCGACTGGATGCGGGGGAGGCATTGGTTACGCCGACCATGCC
SST-12	Pseudomonas aeruginosa NDTH7329;Pseudomonas aeruginosa QZPH16;Pseudomonas aeruginosa QZPH21;Pseudomonas aeruginosa SRRSH1120;Pseudomonas aeruginosa SRRSH2790;Pseudomonas aeruginosa NDTH10366;Pseudomonas aeruginosa SRRSH1408;Pseudomonas aeruginosa SRRSH1002;Pseudomonas aeruginosa PA2207;Pseudomonas aeruginosa TL3773;Pseudomonas aeruginosa NDTH9845;Pseudomonas aeruginosa P23;Pseudomonas aeruginosa …	ACGGCGACGAACTGTTGCGCAGCTGGAGCGCCGGGCGGCGCCTGCGCTTCGACGAGCCCCGGGTGACGCTGTCGCCGGCGGAACAGCGTTGGCTCTCCGCGCACCCGGTCGTGCCGGTGGTGATCAACCATTCCCTTGGCGCGCTCGGGCAACTGGATAACGAGGGGAGGCTGAGTGGTATCGGGCGTGACTATCTGGACCTGATCGGCAAGCGCAGTGGCCTGCAGTTTTCCTTCACTGGAGCACGCAACTTCGTCGAGACGAAAAGCCGACTGGATGCGGGGGAGGCATTGGTTACGCCGACCATGCC
SST-13	Pseudomonas aeruginosa JT86;Pseudomonas aeruginosa LYT4;Pseudomonas aeruginosa BH9;Pseudomonas aeruginosa DVT425;Pseudomonas aeruginosa PB354;Pseudomonas aeruginosa PB353;Pseudomonas aeruginosa R20-14;Pseudomonas aeruginosa YL84	ACGGCGACGAACTGTTGCGCAGCTGGAGCGCCGGGCGGCGCCTGCGCTTCGACGAGCCCCGGGTGACGCTGTCGCCGGCGGAGCAGCGTTGGCTCTCCGCGCACCCGGTCGTGCCGGTGGTGATCAACCATTCCCTTGGCGCGCTCGGACAAGTGGACAGCGAGGGGAAGCTGAGCGGTATCGGGCGTGATTACCTGGAACTGATCGGTAAGCGCAGTGGCCTGCGGTTTTCCTTCACTGGAGCACGCAACTTCGTCGAGACGAAAAGTCGACTGGATGCGGAGGAGGCACTGGTTACGCCGACCATGCC
SST-14	Pseudomonas aeruginosa 34Pae8;Pseudomonas aeruginosa 34Pae23;Pseudomonas aeruginosa H03;Pseudomonas aeruginosa H05;Pseudomonas aeruginosa NDM1_2;Pseudomonas aeruginosa SE5431;Pseudomonas aeruginosa SE5430;Pseudomonas aeruginosa P96131;Pseudomonas aeruginosa SCAID PLC1-2021;Pseudomonas aeruginosa SCAID TST-2021;Pseudomonas aeruginosa F291007;Pseudomonas aeruginosa 1903031130;Pseudomonas aeruginosa…	ACGGCGACGAACTGTTGCGCAGTTGGAGCGCCGGGCGGCGCCTGCGTTTCGACGAGCCCAGGGTGACGCTTGCGCCGGCGGAACAGCGTTGGCTCTCCACGCATCCGGTCGTGCCGGTGGTGATCAACCATTCCCTTGGCGCGCTCGGGCAACTGGATAGCGAGGGGCGGCTGAGCGGTATCGGGCGTGACTATCTGGACCTGATCGGCAAGCGCAGCGGCCTGCAGTTTTCCTTCAGCGGAGCCCGAAACTTCGTCGAGGCGAAACGTCGACTGGATGCGGGCGAGGCGTTGGTTACGCCGACCATGCC
SST-15	Pseudomonas aeruginosa TJ2019-017;Pseudomonas aeruginosa MINF_7A-sc-2280434;Pseudomonas aeruginosa SG17M;Pseudomonas aeruginosa E125;Pseudomonas aeruginosa UNC_PaerCF17;Pseudomonas aeruginosa DVT423;Pseudomonas aeruginosa NCTC13620;Pseudomonas aeruginosa H26027;Pseudomonas aeruginosa W36662;Pseudomonas aeruginosa early NN2	ACGGCGACGAACTGTTGCGCAGCTGGAGCGCCGGGCGGCGCCTGCGCTTCGACGAGCCCCGGGTGACGCTGTCGCCGGCGGAGCAGCGTTGGCTCTCCGCGCACCCGGTCGTGCCGGTGGTGATCAACCATTCCCTTGGCGCGCTCGGGCAACTGGATAACGAGGGGAGGCTGAGTGGTATCGGGCGTGACTATCTGGACCTGATCGGCAAGCGCAGTGGCCTGCGGTTTTCCTTCACTGGAGCACGCAACTTCGTCGAGACGAAAAGCCGACTGGATGCGGGGGAGGCATTGGTTACGCCGACCATGCC
SST-16	Pseudomonas aeruginosa AR_0095	ACGGCGACGAACTGTTGCGCAGTTGGAGCGCCGGGCGGCGCCTGCGTTTCGACGAGCCCCGGGTGACGCTTGCGCCGGCGGAACAGCGTTGGCTCTCCACGCATCCGGTCGTGCCGGTGGTGATCAACCATTCCCTTGGCGCGCTCGGGCAACTGGATAGCGAGGGGCGGCTGAGCGGTATCGGGCGTGACTATCTGGACCTGATCGGCAAGCGCAGCGGCCTGCAGTTTTCCTTCAGCGGAGCCCGAAACTTCGTCGAGGCGAAACGTCGACTGGATGCGGGCGAGGCGTTGGTTACGCCGACCATGCC
SST-17	Pseudomonas aeruginosa VRFPA04;Pseudomonas aeruginosa TL1285;Pseudomonas aeruginosa ZBX-P11;Pseudomonas aeruginosa C79;Pseudomonas aeruginosa DN1;Pseudomonas aeruginosa PPF-1;Pseudomonas aeruginosa Ocean-1175;Pseudomonas aeruginosa Ocean-1155	ACGGCGACGAACTGTTGCGCAGTTGGAGCGCCGGGCGGCGCCTGCGTTTCGACGATCCCAGGGTGACGCTTGCGCCGGCGGAACAGCGTTGGCTCTCCACGCATCCGGTCGTGCCGGTGGTAATCAACCATTCCCTTGGCGCGCTCGGGCAACTGGATAGCGAGGGGCGGCTGAGCGGTATCGGGCGTGACTATCTGGACCTGATCGGCAAGCGCAGCGGCCTGCAGTTTTCCTTCAGCGGAGCCCGAAACTTCGTCGAGGCGAAACGTCGACTGGATGCGGGCGAGGCGTTGGTTACGCCGACCATGCC
SST-18	Pseudomonas aeruginosa NCTC11445;Pseudomonas aeruginosa 8380;Pseudomonas aeruginosa UNC_PaerCF41;Pseudomonas aeruginosa IMP-13	ACGGCGACGAACTGTTGCGCAGCTGGAGCGCCGGGCGGCGCCTGCGCTTCGATGAGCCCCGGGTGACGCTGTCGCCGGCGGAGCAGCGTTGGCTCTCCGCGCACCCGGTCGTGCCGGTGGTGATCAACCATTCCCTTGGCGCGCTCGGGCAACTGGATAACGAGGGGAGGCTGAGTGGTATCGGGCGTGACTATCTGGACCTGATCGGCAAGCGCAGTGGCCTGCAGTTTTCCTTCACTGGAGCACGCAACTTCGTCGAGACGAAAAGCCGACTGGATGCGGGGGAGGCATTGGTTACGCCGACCATGCC
SST-19	Pseudomonas aeruginosa ATCC BAA-2114	ACGGCGACGAACTGTTGCGCAGCTGGAGCGCCGGGAGGCGCCTGCGCTTCGACGATCCCCGGGTGACGCTGTCGCCGGCGGAACAGCGTTGGCTCTCCGCGCACCCGGTCGTGCCGGTGGTGATCAACCATTCCCTTGGCGCGCTCGGACAAGTGGACAGCGAGGGGAAGCTGAGCGGTATCGGGCGTGATTACCTGGAACTGATCGGTAAGCGCAGTGGCCTGCGGTTTTCCTTCACTGGAGCACGCAACTTCGTCGAGACGAAAAGTCGACTGGATGCGGAGGAGGCACTGGTTACGCCGGCCATGCC
SST-20	Pseudomonas aeruginosa H09;Pseudomonas aeruginosa CMC-115	ACGGCGACGAACTGTTGCGCAGCTGGAGCGCCGGGCGGCGCCTGCGCTTCGACGATCCCCAGGTGACGCTGTCGCCGGCGGAGCAGCGTTGGCTCTCCGCGCACCCGGTCGTGCCGGTGGTGATCAACCATTCCCTTGGCGCGCTCGGACAGGTGGATGGCGAGGGGAAGCTGAGCGGTATAGGGCGTGACTATCTGGAGCTGATCGGCAAGCGCAGTGGCCTGCGGTTTTCCTTCACTGGAGCACGTAACTTCGTCGAGACGAAAAGTCGGCTGGACGCGGGCGAGGCATTGGTTACGCCGACCATGCC
SST-21	Pseudomonas aeruginosa LW;Pseudomonas aeruginosa CI27;Pseudomonas aeruginosa H02;Pseudomonas aeruginosa UCBPP-PA14;Pseudomonas aeruginosa PA-VAP-3;Pseudomonas aeruginosa H26023;Pseudomonas aeruginosa M1608;Pseudomonas aeruginosa L10;Pseudomonas aeruginosa PA14Or_reads;Pseudomonas aeruginosa M37351	ACGGCGACGAACTGTTGCGCAGTTGGAGCGCCGGGCGGCGCCTGCGTTTCGACGAGCCCAGGGTGACGCTTGCGCCGGCGGAACAGCGTTGGCTCTCCACGCATCCGGTCGTGCCGGTGGTGATCAACCATTCCCTTGGCGCGCTCGGGCAACTGGATAGCGAGGGGCGGCTGAGCGGTATCGGGCGTGACTATCTGGACCTGATCGGCAAGCGCAGCGGCCTGCAGTTTTCCTTCAGCGGAGCCCGAAACTTCGTCGAGGCGAAACGTCGACTGGATGCGGGCGAAGCGTTGGTTACGCCGACCATGCC
SST-22	Pseudomonas aeruginosa Pa84;Pseudomonas aeruginosa DVT410;Pseudomonas aeruginosa AES1R;Pseudomonas aeruginosa AES1M	ACGGCGACGAACTGTTGCGCAGCTGGAGCGCCGGGAGGCGCCTGCGCTTCGACGATCCCCGGGTGACGCTGTCGCCGGCGGAACAGCGTTGGCTCTCCGCGCACCCGGTCGTGCCGGTGGTGATCAACCATTCCCTTGGCGCGCTCGGGCAACTGGATAACGAGGGGAGGCTGAGTGGTATCGGGCGTGACTATCTGGACCTGATCGGCAAGCGCAGTGGCCTGCGGTTTTCCTTCACTGGAGCACGCAACTTCGTCGAGACGAAAAGTCGACTGGATGCGGAGGAGGCACTGGTTACGCCGACCATGCC
SST-23	Pseudomonas aeruginosa PcyII-40, PcyII-40;Pseudomonas aeruginosa paerg009;Pseudomonas aeruginosa paerg005;Pseudomonas aeruginosa Pa127;Pseudomonas aeruginosa Pa124	ACGGCGACGAACTGTTGCGCAGTTGGAGCGCCGGGCGGCGCCTGCGTTTCGACGAGCCCAGGGTGGCGCTTGCGCCGGCGGAACAGCGTTGGCTCTCCACGCATCCGGTCGTGCCGGTGGTGATCAACCATTCCCTTGGCGCGCTCGGGCAACTGGATAGCGAGGGGCGGCTGAGCGGTATCGGGCGTGACTATCTGGACCTGATCGGCAAGCGCAGCGGCCTGCAGTTTTCCTTCAGCGGAGCCCGAAACTTCGTCGAGGCGAAACGTCGACTGGATGCGGGCGAGGCGTTGGTTACGCCGACCATGCC
SST-24	Pseudomonas aeruginosa LS.2c;Pseudomonas aeruginosa K19PSE24;Pseudomonas aeruginosa BAMC 07-48;Pseudomonas aeruginosa MTB-1;Pseudomonas aeruginosa PABCH05;Pseudomonas aeruginosa H16	ACGGCGACGAACTGTTGCGCAGTTGGAGCGCCGGGCGGCGCCTGCGTTTCGACGAGCCCAGGGTGACGCTTGCGCCGGCGGAACAGCGTTGGCTCTCCACGCATCCGGTCGTGCCGGTGGTGATCAACCATTCCCTTGGCGCGCTCGGGCAACTGGATAGCGAGGGGCGGCTGAGCGGTATCGGGCGTGACTATCTGGACCTGATCGGCAAGCGCAGCGGCCTGCAGTTTTCCTTCAGCGGAGCCCGAAACTTCGTCGAGGCGAAACGTCGACTGGATGTGGGCGAGGCGTTGGTTACGCCGACCATGCC
SST-25	Pseudomonas aeruginosa PAC6;Pseudomonas aeruginosa JNQH-PA033;Pseudomonas aeruginosa LYSZa7;Pseudomonas aeruginosa ZS-PA-05;Pseudomonas aeruginosa TJ2014-049;Pseudomonas aeruginosa PABCH10;Pseudomonas aeruginosa 6762;Pseudomonas aeruginosa 12939	ACGGCGACGAACTGTTGCGCAGCTGGAGCGCCGGGCGGCGCCTGCGTTTCGACGATCCCCGGGTGAGGCTTGCGCCGGCGGAACAGCGTTGGCTCTCCACGCATCCGGTCGTGCCGGTGGTGATCAACCATTCCCTTGGTGCGCTCGGGCAACTGGATAGCGAGGGGCGGCTGAGCGGTATCGGGCGTGACTATCTGGACCTGATCGGCAAGCGCAGTGGCCTGCAGTTTTCCTTCAGCGGAGCCCGAAACTTCGTCGAGGCGAAACGTCGACTGGATGCGGGCGAGGCGTTGGTTACGCCGACCATGCC
SST-26	Pseudomonas aeruginosa TJ2019-022;Pseudomonas aeruginosa NCCP15783;Pseudomonas aeruginosa 519119;Pseudomonas aeruginosa PA298;Pseudomonas aeruginosa E80;Pseudomonas aeruginosa Y71;Pseudomonas aeruginosa WCHPA075019;Pseudomonas aeruginosa Y89;Pseudomonas aeruginosa Pa1242;Pseudomonas aeruginosa PA1088;Pseudomonas aeruginosa PA7790;Pseudomonas aeruginosa PA8281;Pseudomonas aeruginosa PA11803;Pseudo…	ACGGCGACGAACTGTTGCGCAGCTGGAGCGCCGGGAGGCGCCTGCGCTTCGACGATCCCCGGGTGACGCTGTCGCCGGCGGAACAGCGTTGGCTCTCCGCGCACCCGGTCGTGCCGGTGGTGATCAACCATTCCCTTGGCGCGCTCGGGCAACTGGATAACGAGGGGAGGCTGAGTGGTATCGGGCGTGACTATCTGGACCTGATCGGCAAGCGCAGTGGCCTGCGGTTTTCCTTCACTGGAGCACGCAACTTCGTCGAGACGAAAAGCCGACTGGATGCGGGGGAGGCATTGGTTACGCCGACCATGCC
SST-27	Pseudomonas aeruginosa DVT412	ACGGCGACGAACTGTTGCGCAGCTGGAGCGCCGGGCGGCGCCTGCGCTTCGACGAGCCCCGGGTGACGCTGTCGCCGGCGGAGCAGCGTTGGCTCTCCGCGCACCCGGTCGTGCCGGTGGTGATCAACCATTCCCTTGGCGCGCTCGGGCAACTGGATAACGAGGGGAGGCTGAGTGGTATCGGGCGTGACTATCTGGACCTGATCGGCAAGCGCAGTGGCCTGCAGTTTTCCTTCACTGGAGCACGCAACTTCGTCGAGACGAAAAGCCGACTGGATGTGGGGGAGGCATTGGTTACGCCGACCATGCC
SST-28	Pseudomonas aeruginosa Pb18	ACGGCGACGAACTGTTGCGCAGCTGGAGCGCCGGGCGGCGCCTGCGCTTCGACGAGCCCCGGGTGACGCTGTCGCCGGCGGAGCAGCGTTGGCTCTCCGCGCACCCGGTCGTGCCGGTGGTGATCAACCATTCCCTTGGCGCGCTCGGGCAACTGGATAACGAGGGGAGGCTGAGTGGTATCGGGCGTGACTATCTGGACCTGATCGGCAAGCGCAGTGGCCTGCAGTTTTCCTTCACTGGAGCACGCAACTTCGTCGAGACGAAAAGCCGACTGGATGCGGGGGAGGCATCGGTTACGCCGACCATGCC
SST-29	Pseudomonas aeruginosa JB2	ACGGCGACGAACTGTTGCGCAGTTGGAGCGCCGGGCGGCGCCTGCGTTTCGACGAGCCCAGGGTGACGCTTGCGCCGGCGGAACAGCGTTGGCTCTCCACGCATCCGGTCGTGCCGGTGGTGATCAACCATTCCCTTGGCGCGCTCGGGCAACTGGATAGCGAGGGGCGGCTGAGCGGTATCGGGCATGACTATCTGGACCTGATCGGCAAGCGCAGCGGCCTGCAGTTTTCCTTCAGCGGAGCCCGAAACTTCGTCGAGGCGAAACGTCGACTGGATGCGGGCGAGGCGTTGGTTACGCCGACCATGCC
SST-30	Pseudomonas aeruginosa W45909;Pseudomonas aeruginosa FA-HZ1;Pseudomonas aeruginosa E167;Pseudomonas aeruginosa E131;Pseudomonas aeruginosa E104;Pseudomonas aeruginosa H10;Pseudomonas aeruginosa DVT729;Pseudomonas aeruginosa KRP1;Pseudomonas aeruginosa NCTC13618;Pseudomonas aeruginosa paerg000;Pseudomonas aeruginosa HS9	ACGGCGACGAACTGTTGCGCAGCTGGAGCGCCGGGAGGCGCCTGCGCTTCGACGATCCCCGGGTGACGCTGTCGCCGGCGGAACAGCGTTGGCTCTCCGCGCACCCGGTCGTGCCGGTGGTGATCAACCATTCCCTTGGCGCGCTCGGGCAACTGGATAACGAGGGGAGGCTGAGTGGTATCGGGCGTGACTATCTGGACCTGATCGGCAAGCGCAGTGGCCTGCGGTTTTCCTTCACTGGAGCACGCAACTTCGTCGAGACGAAAAGCCGACTGGATGCGGAGGAGGCACTGGTTACGCCGACCATGCC
SST-31	Pseudomonas aeruginosa C7447m	ACGGCGACGAACTGTTGCGCAGCTGGAGCGCCGGGCGGCGCCTGCGCTTCGACGAGCCCCGGGTGACGCTGTCGCCGGCGGAACAGCGTTGGCTCTCCGCGCACCCGGTCGTGCCGGTGGTGATCAACCATTCCCTTGGCGCGCTCGGRCAASTGGATAACGAGGGGAGGCTGAGYGGTATCGGGCGTGAYTAYCTGGAMCTGATCGGTAAGCGCAGTGGCCTGCGGTTTTCCTTCACTGGAGCACGCAACTTCGTCGAGACGAAAAGTCGACTGGATGCGGAGGAGGCACTGGTTACGCCGACCATGCC
SST-32	Pseudomonas aeruginosa SCAID WND3-2019	ACGGCGACGAACTGTTGCGCAGCTGGAGCGCCGGGCGGCGCCTGCGCTTCGACGATCCCCGGGTGACGCTGTCGCCGGCGGAACAGCGTTGGCTCTCCGCGCACCCGGTCGTGCCGGTGGTGATCAACCATTCCCTTGGCGCGCTCGGGCAACTGGATAACGAGGGGAGGCTGAGTGGTATCGGGCGTGACTATCTGGACCTGATCGGCAAGCGCAGTGGCCTGCAGTTTTCCTTCACTGGAGCACGCAACTTCGTCGAGACGAAAAGCCGACTGGATGCGGGGGAGGCATTGGTTACGCCGACCATGCC
SST-33	Pseudomonas aeruginosa AR_460	ACGGCGACGAGCTGTTGCGCAGCTGGAGCGCCGGGCGGCGCCTGCGCTTCGACGAGCCCCGGGTGACGCTGTCGCCGGCGGAGCAGCGTTGGCTCTCCGCGCACCCGGTCGTGCCGGTGGTGATCAACCATTCCCTTGGCGCGCTCGGGCAACTGGATAACGAGGGGAGGCTGAGTGGTATCGGGCGTGACTATCTGGACCTGATCGGCAAGCGCAGTGGCCTGCAGTTTTCCTTCACTGGAGCACGCAACTTCGTCGAGACGAAAAGCCGACTGGATGCGGGGGGGGCATTGGTTACGCCGACCATGCC
SST-34	Pseudomonas aeruginosa PAO1H2O	ACGGCGACGAACTGTTGCGCAGCTGGAGCGCCGGGCGGCGCCTGCGCTTCGACGAGCCCCGGGTGACGCTGTCGCCGGCGGAGCAGCGTTGGCTCTCCGCGCACCCGGTCGTGCCGGTGGTGATCAACCATTCCCTTGGCGCGCTCGGGCAACTGGATAACGAGGGGAGGCTGAGTGGTATCGGGCGTGACTATCTGGACCTGATCGGCAAGCGCAGTGGCCTGCNGTTTTCCTTCACTGGAGCACGCAACTTCGTCGAGACGAAAAGNCGACTGGATGCGGNGGAGGCANTGGTTACGCCGACCATGCC
SST-35	Pseudomonas aeruginosa DVT427	ACGGCGATGAACTGTTGCGCAGCTGGAGCGCCGGGCGGCGCCTGCGCTTCGATGAGCCCCGGGTGACGCTGTCGCCGGCGGAGCAGCGTTGGCTCTCCGCGCACCCGGTCGTGCCGGTGGTGATCAACCATTCCCTTGGCGCGCTCGGACAAGTGGACAGCGAGGGGAAGCTGAGCGGTATCGGGCGTGATTACCTGGAACTGATCGGTAAGCGCAGTGGCCTGCGGTTTTCCTTCACTGGAGCACGCAACTTCGTCGAGACGAAAAGTCGACTGGATGCGGAGGAGGCACTGGTTACGCCGACCATGCC

## Sheet: Sheet4. pheT database
ST-dhaM	Strains	Sequences
SST-1	Pseudomonas aeruginosa 12-4-4(59);Pseudomonas aeruginosa PAD8;Pseudomonas aeruginosa SE5443;Pseudomonas aeruginosa PABCH13;Pseudomonas aeruginosa PAG5;Pseudomonas aeruginosa QZPH41	GCGTGGACTTCTTCGACGCCAAGGCCGATGTCGAGGCAGTGCTGGCCAGTGCTGGTGCCCTCGGCGACTTCAGCTTCGTGCCCGGCGAGCACCCGGCGCTGCACCCGGGGCAGACCGCACGCATCGAGCGGGAAGGGCGGCTGGTCGGCTACCTGGGCGCGCTGCATCCGGAATTGGCGAAGAAACTCGACCTCGAGCAGCCGGTGTTCCTCTTCGAGCTGCTGCTGGCCGAAGTGGTCGACGGCCACCTGCCGAAGTTCCGCGAGCTGTC
SST-2	Pseudomonas aeruginosa F13;Pseudomonas aeruginosa NCTC10728;Pseudomonas aeruginosa UNC_PaerCF13;Pseudomonas aeruginosa 8D;Pseudomonas aeruginosa PA1616;Pseudomonas aeruginosa H11;Pseudomonas aeruginosa E01;Pseudomonas aeruginosa E02;Pseudomonas aeruginosa E03;Pseudomonas aeruginosa R01;Pseudomonas aeruginosa R08;Pseudomonas aeruginosa R09;Pseudomonas aeruginosa R07;Pseudomonas aeruginosa R10;Pseu…	GCGTGGACTTCTTCGACGCCAAGGCCGATGTCGAGGCAGTGCTGGCCAGTGCCGGCGCCCTCGGCGACTTCAGCTTCGTGCCCGGTGAGCACCCGGCGCTGCACCCGGGGCAGACCGCGCGCATCGAGCGGGACGGGCGGCTGGTCGGCTACCTGGGCGCGCTGCATCCGGAATTGGCGAAGAAACTCGACCTCGAGCAGCCGGTGTTCCTCTTCGAGCTGCTGCTGGCCGAAGTGGTCGACGGCCACCTGCCGAAGTTCCGCGAGCTGTC
SST-3	Pseudomonas aeruginosa 34Pae36;Pseudomonas aeruginosa HB2011305RE;Pseudomonas aeruginosa DL201330;Pseudomonas aeruginosa A-I-1;Pseudomonas aeruginosa AG1;Pseudomonas aeruginosa PA38182;Pseudomonas aeruginosa Y82;Pseudomonas aeruginosa RW109;Pseudomonas aeruginosa F5677;Pseudomonas aeruginosa AR445;Pseudomonas aeruginosa RIVM-EMC2982;Pseudomonas aeruginosa F30658;Pseudomonas aeruginosa Carb01 63;P…	GCGTGGACTTCTTCGACGCCAAGGCCGATGTCGAGGCAGTGCTGGCCAGTGCCGGTGCCCTCGGCGACTTCAGCTTCGTGCCCGGCGAGCACCCGGCGCTGCACCCGGGGCAGACCGCGCGCATCGAGCGGGAAGGGCGGCTGGTCGGCTACCTGGGCGCGCTGCATCCGGAACTGGCGAAGAAACTCGACCTCGAGCAGCCGGTGTTCCTCTTCGAGCTGCTGCTGGCCGAAGTGGTCGACGGCCACCTGCCGAAGTTCCGCGAGCTGTC
SST-4	Pseudomonas aeruginosa ATCC BAA-2108;Pseudomonas aeruginosa WTJH12;Pseudomonas aeruginosa F22031;Pseudomonas aeruginosa T63266;Pseudomonas aeruginosa PcyII-29, PcyII-29;Pseudomonas aeruginosa CF39S;Pseudomonas aeruginosa IMP66;Pseudomonas aeruginosa IMP68;Pseudomonas aeruginosa IMP67;Pseudomonas aeruginosa UNC_PaerCF20;Pseudomonas aeruginosa FDAARGOS_1041;Pseudomonas aeruginosa SE5369;Pseudomonas…	GCGTGGACTTCTTCGACGCCAAGGCCGATGTCGAGGCAGTGCTGGCCAGTGCCGGCGCCCTCGGCGACTTCAGCTTCGTGCCCGGCGAGCACCCGGCGCTGCACCCGGGGCAGACCGCGCGCATCGAGCGGGACGGGCGGCTGGTCGGCTACCTGGGCGCGCTGCATCCGGAACTGGCGAAGAAACTCGACCTCGAGCAGCCGGTGTTCCTCTTCGAGCTGCTGTTGGCCGAAGTGGTCGACGGCCACCTGCCGAAGTTCCGCGAGCTGTC
SST-5	Pseudomonas aeruginosa H07;Pseudomonas aeruginosa ZPPH29;Pseudomonas aeruginosa PAAK088;Pseudomonas aeruginosa A681;Pseudomonas aeruginosa F63912;Pseudomonas aeruginosa AR_458;Pseudomonas aeruginosa RP73;Pseudomonas aeruginosa T2436;Pseudomonas aeruginosa NCTC11445;Pseudomonas aeruginosa Pb18;Pseudomonas aeruginosa 519119	GCGTGGACTTCTTCGACGCCAAGGCCGATGTCGAGGCAGTGCTGGCCAGTGCCGGCGCCCTCGGCGACTTCAGCTTCGTGCCCGGCGAGCACCCGGCGCTGCACCCAGGGCAGACCGCGCGCATCGAGCGGGAAGGGCGGCTGGTCGGCTACCTGGGCGCGCTGCATCCGGAACTGGCGAAGAAACTCGACCTCGAGCAGCCGGTGTTCCTCTTCGAGCTGCTGCTGGCCGAAGTGGTCGACGGCCACCTGCCGAAGTTCCGCGAGCTGTC
SST-6	Pseudomonas aeruginosa PES_P749	GCGTGGACTTCTTCGACGCCAAGGCCGATGTCGAGGCAGTGCTGGCCAGTGCCGGCGCCCTCGGCGACTTCAGTTTCGTGCCCGGCGAGCACCCGGCGCTGCACCCGGGGCAGACCGCGCGCATCGAGCGGGACGGGCGGCTGGTCGGCTACCTGGGCGCGCTGCATCCGGAACTGGCGAAGAAACTCGACCTCGAGCAGCCGGTGTTCCTCTTCGAGCTGCTGTTGGCCGAAGTGGTCGACGGTCACCTGCCGAAGTTCCGCGAGCTGTC
SST-7	Pseudomonas aeruginosa A0002;Pseudomonas aeruginosa 34Pae8;Pseudomonas aeruginosa 34Pae23;Pseudomonas aeruginosa H03;Pseudomonas aeruginosa NDM1_2;Pseudomonas aeruginosa SE5430;Pseudomonas aeruginosa P96131;Pseudomonas aeruginosa F291007;Pseudomonas aeruginosa 1903031130;Pseudomonas aeruginosa SE5429;Pseudomonas aeruginosa SE5352;Pseudomonas aeruginosa PA19-3047;Pseudomonas aeruginosa B-I-1;Pseud…	GCGTGGACTTCTTCGACGCCAAGGCCGATGTCGAGGCAGTGCTGGCCAGTGCCGGTGCCCTCGGCGACTTCAGCTTCGTGCCCGGCGAGCACCCGGCGCTGCACCCGGGGCAGACCGCGCGCATCGAGCGGGAAGGGCGGCTGGTCGGCTACCTGGGTGCGCTGCATCCGGAACTGGCGAAGAAACTCGACCTCGAGCAGCCGGTGTTCCTCTTCGAGCTGCTGTTGGCCGAAGTGGTCGACGGTCACCTGCCGAAGTTCCGCGAGCTGTC
SST-8	Pseudomonas aeruginosa P93127;Pseudomonas aeruginosa P4970C;Pseudomonas aeruginosa FAHZU40;Pseudomonas aeruginosa AJ D 2;Pseudomonas aeruginosa 1334/14;Pseudomonas aeruginosa 97;Pseudomonas aeruginosa F23197;Pseudomonas aeruginosa PAK;Pseudomonas aeruginosa PAM68;Pseudomonas aeruginosa PAS6;Pseudomonas aeruginosa PAG7;Pseudomonas aeruginosa TJ2019-022;Pseudomonas aeruginosa PA-2;Pseudomonas aerug…	GCGTGGACTTCTTCGACGCCAAGGCCGATGTCGAGGCAGTGCTGGCCAGTGCCGGTGCCCTCGGCGACTTCAGCTTCGTGCCCGGCGAGCACCCGGCGTTACACCCGGGGCAGACCGCGCGCATCGAGCGGGACGGGCGGCTGGTCGGCTACCTGGGCGCGCTGCATCCGGAACTGGCGAAGAAGCTCGACCTCGAGCAGCCGGTGTTCCTCTTCGAGCTGCTGCTGGCCGAAGTGGTCGACGGCCACCTGCCGAAGTTCCGCGAGCTGTC
SST-9	Pseudomonas aeruginosa SE5419;Pseudomonas aeruginosa SE5416;Pseudomonas aeruginosa DVT779;Pseudomonas aeruginosa PcyII-40, PcyII-40;Pseudomonas aeruginosa paerg009;Pseudomonas aeruginosa paerg005;Pseudomonas aeruginosa Pa127;Pseudomonas aeruginosa Pa124;Pseudomonas aeruginosa ST167_d57blood;Pseudomonas aeruginosa ST167_d26burn;Pseudomonas aeruginosa ST167_d67burn2;Pseudomonas aeruginosa ST167_d68…	GCGTGGACTTCTTCGACGCCAAGGCCGATGTCGAGGCAGTGCTGGCCAGTGCCGGCGCCCTCGGCGACTTCAGCTTCGTGCCCGGTGAGCACCCGGCGCTGCACCCGGGGCAGACCGCGCGCATCGAGCGGGACGGGCGGCTGGTCGGCTACCTGGGCGCGCTGCATCCGGAACTGGCGAAGAAACTCGACCTCGAGCAGCCGGTGTTCCTCTTCGAGCTGCTGTTGGCCGAAGTGGTCGACGGCCACCTGCCGAAGTTCCGCGAGCTGTC
SST-10	Pseudomonas aeruginosa PDNC003;Pseudomonas aeruginosa AR19583;Pseudomonas aeruginosa AR19640;Pseudomonas aeruginosa SE5452;Pseudomonas aeruginosa PABCH09;Pseudomonas aeruginosa paerg012;Pseudomonas aeruginosa paerg011;Pseudomonas aeruginosa paerg010;Pseudomonas aeruginosa paerg003;Pseudomonas aeruginosa paerg004;Pseudomonas aeruginosa paerg002	GCGTGGACTTCTTCGACGCCAAGGCCGATGTCGAGGCAGTGCTGGCCAGTGCTGGTGCCCTCGGCGACTTCAGCTTCGTGCCCGGCGAGCACCCGGCGCTGCACCCGGGGCAGACCGCACGCATCGAGCGGGAAGGGCGGCTGGTCGGCTACCTGGGTGCGCTACATCCGGAATTGGCGAAGAAACTCGACCTCGAGCAGCCGGTGTTCCTCTTCGAGCTGCTGTTGGCCGAAGTGGTCGACGGCCACCTGCCGAAGTTCCGCGAGCTGTC
SST-11	Pseudomonas aeruginosa C-I-1	GCGTGGACTTCTTCGACGCCAAGGCCGATGTCGAGGCAGTGCTGGCCAGTGCTGGTGCCCTCGGTGACTTCAGCTTCGTGCCCGGCGAGCAGCCGGCGCTGCACCCGGGGCAGACCGCACGCATCGAGCGGGAAGGGCGGCTGGTCGGCTACCTGGGTGCGCTACATCCGGAATTGGCGAAGAAACTCGACCTCGAGCAGCCGGTGTTCCTCTTCGAGCTGCTGCTGGCCGAAGTGGTCGACGGCCACCTGCCGAAGTTCCGCGAGCTGTC
SST-12	Pseudomonas aeruginosa SCAID PHRX1-2019;Pseudomonas aeruginosa YB01;Pseudomonas aeruginosa SCAID WND1-2019;Pseudomonas aeruginosa DSM 50071	GCGTGGACTTCTTCGACGCCAAAGCCGATGTCGAGGCAGTGCTGGCCAGTGCCGGCGCCCTCGGCGACTTCAGCTTCGTGCCCGGCGAGCACCCGGCGCTGCACCCGGGGCAGACCGCACGCATCGAGCGGGAAGGGCGGCTGGTCGGCTACCTGGGTGCGCTGCATCCGGAACTGGCGAAGAAACTCGACCTCGAGCAGCCGGTGTTCCTCTTCGAGCTGCTGTTGGCCGAAGTGGTCGACGGTCACCTGCCGAAGTTCCGCGAGCTGTC
SST-13	Pseudomonas aeruginosa M8A4	GCGTGGACTTCTTCGACGCTAAGGCCGATGTCGAGGCAGTGCTGGCCAGTGCCGGTGCCCTCGGCGACTTCAGCTTCGTGCCCGGCGAGCACCCGGCGCTGCACCCGGGGCAGACCGCGCGCATCGAGCGGGAAGGGCGGCTGGTCGGCTACCTGGGCGCGCTGCATCCGGAACTGGCGAAGAAACTCGACCTCGAGCAGCCGGTGTTCCTCTTCGAGCTGCTGTTGGCCGAAGTGGTCGACGGTCACCTGCCGAAGTTCCGCGAGCTGTC
SST-14	Pseudomonas aeruginosa C7-25, C7-25	GCGTGGACTTCTTCGACGCCAAAGCCGATGTCGAGGCAGTGCTGGCCAGTGCCGGCGCCCTCGGCGACTTCAGCTTCGTGCCCGGCGAGCACCCGGCGCTGCACCCGGGGCAGACCGCACGCATCGAGCGGGAAGGGCGGCTGGTCGGCTACCTGGGTGCGCTACATCCGGAATTGGCGAAGAAACTCGACCTCGAGCAGCCGGTGTTCCTCTTCGAGCTGCTGCTGGCCGAAGTGGTCGACGGCCACCTGCCGAAGTTCCGCGAGCTGTC
SST-15	Pseudomonas aeruginosa Pa12;Pseudomonas aeruginosa YY322;Pseudomonas aeruginosa AR_0230;Pseudomonas aeruginosa PA83;Pseudomonas aeruginosa ZBX-P12;Pseudomonas aeruginosa CDN129;Pseudomonas aeruginosa CDN118;Pseudomonas aeruginosa AR_0111;Pseudomonas aeruginosa K34-7;Pseudomonas aeruginosa AR_0360;Pseudomonas aeruginosa AR444;Pseudomonas aeruginosa AR_0110;Pseudomonas aeruginosa ZBX-P23	GCGTGGACTTCTTCGACGCCAAGGCCGATGTCGAGGCAGTGCTGGCCAGTGCCGGTGCCCTCTGCGACTTCAGCTTCGTGCCCGGCGAGCACCCGGCGCTGCACCCGGGGCAGACCGCGCGCATCGAGCGGGAAGGGCGGCTGGTCGGCTACCTGGGCGCGCTGCATCCGGAACTGGCGAAGAAACTCGACCTCGAGCAGCCGGTGTTCCTCTTCGAGCTGCTGCTGGCCGAAGTGGTCGACGGCCACCTGCCGAAGTTCCGCGAGCTGTC
SST-16	Pseudomonas aeruginosa DVT401;Pseudomonas aeruginosa AES1R;Pseudomonas aeruginosa AES1M;Pseudomonas aeruginosa ZPPH14	GCGTGGACTTCTTCGACGCCAAGGCCGATGTCGAGGCAGTGCTGGCCAGTGCCGGCGCCCTCGGCGACTTCAGCTTCGTGCCCGGCGAGCACCCGGCGCTGCACCCGGGGCAGACCGCGCGCATCGAGCGGGAAGGGCGGCTGGTCGGCTACCTGGGCGCGCTGCATCCGGAACTGGCGAAGAAACTCGACCTCGAGCAGCCGGTGTTCCTCTTCGAGCTGCTGTTGGCCGAAGTGGTCGACGGCCACCTGCCGAAGTTCCGCGAGCTGTC
SST-17	Pseudomonas aeruginosa RD1-3;Pseudomonas aeruginosa 8380	GCGTGGACTTCTTCGACGCCAAAGCCGATGTCGAGGCAGTGCTGGCCAGTGCCGGCGCCCTCGGCGACTTCAGCTTCGTGCCCGGCGAGCACCCGGCGCTGCACCCAGGGCAGACCGCGCGCATCGAGCGGGAAGGGCGGCTGGTCGGCTACCTGGGCGCGCTGCATCCGGAACTGGCGAAGAAACTCGACCTCGAGCAGCCGGTGTTCCTCTTCGAGCTGCTGCTGGCCGAAGTGGTCGACGGCCACCTGCCGAAGTTCCGCGAGCTGTC
SST-18	Pseudomonas aeruginosa X78812	GCGTGGACTTCTTCGACGCCAAAGCCGATGTCGAGGCAGTGCTGGCCAGTGCCGGCGCCCTCGGCGACCTCAGCTTCGTGCCCGGCGAGCACCCGGCGCTGCACCCAGGGCAGACCGCGCGCATCGAGCGGGAAGGGCGGCTGGTCGGCTACCTGGGCGCGCTGCATCCGGAACTGGCGAAGAAACTCGACCTCGAGCAGCCGGTGTTCCTCTTCGAGCTGCTGCTGGCCGAAGTGGTCGACGGCCACCTGCCGAAGTTCCGCGAGCTGTC
SST-19	Pseudomonas aeruginosa E113;Pseudomonas aeruginosa NDTH7329;Pseudomonas aeruginosa QZPH16;Pseudomonas aeruginosa QZPH21;Pseudomonas aeruginosa SRRSH1120;Pseudomonas aeruginosa SRRSH2790;Pseudomonas aeruginosa NDTH10366;Pseudomonas aeruginosa SRRSH1408;Pseudomonas aeruginosa SRRSH1002;Pseudomonas aeruginosa PA2207;Pseudomonas aeruginosa TL3773;Pseudomonas aeruginosa NDTH9845;Pseudomonas aeruginosa…	GCGTGGACTTCTTCGACGCCAAGGCCGATGTCGAGGCAGTGCTGGCCAGTGCTGGTGCCCTCGGCGACTTCAGCTTCGTGCCCGGCGAGCACCCGGCGCTGCACCCGGGGCAGACCGCACGCATCGAGCGGGAAGGGCGGCTGGTCGGCTACCTGGGGGCGCTGCATCCGGAATTGGCGAAGAAACTCGACCTCGAGCAGCCGGTGTTCCTCTTCGAGCTGCTGCTGGCCGAAGTGGTCGACGGCCACCTGCCGAAGTTCCGCGAGCTGTC
SST-20	Pseudomonas aeruginosa H05;Pseudomonas aeruginosa PABCH46;Pseudomonas aeruginosa PS1793;Pseudomonas aeruginosa PABL048;Pseudomonas aeruginosa AR_455;Pseudomonas aeruginosa S04 90	GCGTGGACTTCTTCGACGCCAAAGCCGATGTCGAGGCAGTGCTGGCCAGTGCCGGCGCCCTCGGCGACTTCAGCTTCGTGCCCGGCGAGCACCCGGCGCTGCACCCGGGGCAGACCGCGCGCATCGAGCGGGAAGGGCGGCTGGTCGGCTACCTGGGCGCGCTGCATCCGGAACTGGCGAAGAAACTCGACCTCGAGCAGCCGGTGTTCCTCTTCGAGCTGCTGCTGGCCGAAGTGGTCGACGGCCACCTGCCGAAGTTCCGCGAGCTGTC
SST-21	Pseudomonas aeruginosa E04	GCGTGGACTTCTTCGACGCCAAGGCCGATGTCGAGGCAGTGCTGGCCAGTGCTGGTGCCCTCGGTGACTTCAGCTTCGTGCCCGGCGAGCACCCGGCGCTGCACCCGGGGCAGACCGCACGCATCGAGCGGGAAGGGCGGCTGGTCGGCTACCTGGGTGCGCTACATCCGGAATTGGCGAAGAAACTCGACCTCGAGCAGCCGGTGTTCCTCTTCGAGCTGCTGCTGGCCGAAGTGGTCGACGGCCACCTGCCGAAGTTCCGCGAGCTGTC
SST-22	Pseudomonas aeruginosa SE5431;Pseudomonas aeruginosa PA34;Pseudomonas aeruginosa CFSAN084950	GCGTGGACTTCTTCGACGCCAAGGCCGATGTCGAGGCAGTGCTGGCCAGTGCCGGTGCCCTCGGCGACTTCAGCTTCGTGCCCGGCGAGCACCCGGCGCTGCACCCGGGGCAGACCGCGCGCATCGAGCGGGACGGGCGGCTGGTCGGCTACCTGGGCGCGCTGCATCCGGAACTGGCGAAGAAACTCGACCTCGAGCAGCCGGTGTTCCTCTTCGAGCTGCTGTTGGCCGAAGTGGTCGACGGCCACCTGCCGAAGTTCCGCGAGCTGTC
SST-23	Pseudomonas aeruginosa Pa608;Pseudomonas aeruginosa PA_150577;Pseudomonas aeruginosa M18;Pseudomonas aeruginosa LYT4;Pseudomonas aeruginosa BH9;Pseudomonas aeruginosa DVT425;Pseudomonas aeruginosa H19;Pseudomonas aeruginosa SCAID WND3-2019;Pseudomonas aeruginosa PABL017;Pseudomonas aeruginosa PAO1;Pseudomonas aeruginosa PAO1-N;Pseudomonas aeruginosa PAO1-L;Pseudomonas aeruginosa PAO1_Mat-X-1;Pseu…	GCGTGGACTTCTTCGACGCCAAGGCCGATGTCGAGGCAGTGCTGGCCAGTGCTGGTGCCCTCGGCGACTTCAGCTTCGTGCCCGGCGAGCACCCGGCGCTGCACCCGGGGCAGACCGCACGCATCGAGCGGGAAGGGCGGCTGGTCGGCTACCTGGGTGCGCTACATCCGGAATTGGCGAAGAAACTCGACCTCGAGCAGCCGGTGTTCCTCTTCGAGCTGCTGCTGGCCGAAGTGGTCGACGGCCACCTGCCGAAGTTCCGCGAGCTGTC
SST-24	Pseudomonas aeruginosa UNC_PaerCF35;Pseudomonas aeruginosa W45909;Pseudomonas aeruginosa FA-HZ1;Pseudomonas aeruginosa E167;Pseudomonas aeruginosa E131;Pseudomonas aeruginosa E104;Pseudomonas aeruginosa H10;Pseudomonas aeruginosa DVT729;Pseudomonas aeruginosa KRP1;Pseudomonas aeruginosa NCTC13618;Pseudomonas aeruginosa paerg000;Pseudomonas aeruginosa HS9	GCGTGGACTTCTTCGACGCCAAGGCCGATGTTGAGGCAGTGCTGGCCAGTGCCGGTGCCCTCGGCGACTTCAGCTTCGTGCCCGGCGAGCACCCGGCGCTGCACCCGGGGCAGACCGCGCGCATCGAGCGGGACGGGCGGCTGGTCGGCTACCTGGGCGCGCTGCATCCGGAACTGGCGAAGAAACTCGATCTCGAGCAGCCGGTGTTCCTCTTCGAGCTGCTGTTGGCCGAAGTGGTCGACGGTCACCTGCCGAAGTTCCGCGAGCTGTC
SST-25	Pseudomonas aeruginosa SCAID PLC1-2021;Pseudomonas aeruginosa SCAID TST-2021;Pseudomonas aeruginosa WPB099;Pseudomonas aeruginosa WPB101;Pseudomonas aeruginosa WPB100;Pseudomonas aeruginosa PASGNDM699;Pseudomonas aeruginosa Pa58;Pseudomonas aeruginosa PASGNDM345;Pseudomonas aeruginosa AR_0353;Pseudomonas aeruginosa B10W;Pseudomonas aeruginosa G-I-1;Pseudomonas aeruginosa VA-134;Pseudomonas aerugi…	GCGTGGACTTCTTCGACGCCAAGGCCGATGTCGAGGCAGTGCTGGCCAGTGCCGGTGCCCTCGGCGACTTCAGCTTCGTGCCCGGCGAGCACCCGGCGCTGCACCCGGGGCAGACCGCGCGCATCGAGCGGGACGGGCGGCTGGTCGGCTACCTGGGCGCGCTGCATCCGGAACTGGCGAAGAAGCTCGACCTCGAGCAGCCGGTGTTCCTCTTCGAGCTGCTGCTGGCCGAAGTAGTCGACGGCCACCTGCCGAAGTTCCGCGAGCTGTC
SST-26	Pseudomonas aeruginosa TJ2019-017;Pseudomonas aeruginosa MINF_7A-sc-2280434;Pseudomonas aeruginosa TL1285;Pseudomonas aeruginosa ZBX-P11;Pseudomonas aeruginosa C79;Pseudomonas aeruginosa DN1;Pseudomonas aeruginosa PPF-1;Pseudomonas aeruginosa Ocean-1175;Pseudomonas aeruginosa Ocean-1155;Pseudomonas aeruginosa 12939	GCGTGGACTTCTTCGACGCCAAGGCCGATGTCGAGGCAGTGCTGGCCAGTGCCGGTGCCCTCGGCGACTTCAGCTTCGTGCCCGGCGAGCACCCGGCGCTGCACCCGGGGCAGACCGCGCGCATCGAGCGGGAAGGGCGGCTGGTCGGCTACCTGGGCGCGCTGCATCCGGAACTGGCGAAGAAACTCGACCTCGAGCAGCCGGTGTTCCTCTTCGAGCTGCTGTTGGCCGAAGTGGTCGACGGTCACCTGCCGAAGTTCCGCGAGCTGTC
SST-27	Pseudomonas aeruginosa AR_0095	GCGTGGACTTCTTCGACGCCAAAGCCGATGTCGAGGCAGTGCTGGCCAGTGCCGGCGCCCTCGGCGACTTCAGCTTCGTGCCCGGCGAGCACCCGGCGCTGCACCCGGGGCAGACCGCGCGCATCGAGCGGGAAGGGCGGCTGGTCGGCTACCTGGGCGCGCTGCATCCGGAACTGGCGAAGAAACTCGACCTTGAGCAGCCGGTGTTCCTCTTCGAGATGCTGCTGGCCGAAGTGGTCGACGGCCACCTGCCGAAGTTCCGCGAGCTGTC
SST-28	Pseudomonas aeruginosa PA_D21;Pseudomonas aeruginosa PA_D5;Pseudomonas aeruginosa PA_D25;Pseudomonas aeruginosa PA_D22;Pseudomonas aeruginosa PA_D16;Pseudomonas aeruginosa PA_D9;Pseudomonas aeruginosa PA_D2;Pseudomonas aeruginosa PA_D1;Pseudomonas aeruginosa JNQH-PA57;Pseudomonas aeruginosa CI27;Pseudomonas aeruginosa H02;Pseudomonas aeruginosa UCBPP-PA14;Pseudomonas aeruginosa PA-VAP-3;Pseudomon…	GCGTGGACTTCTTCGACGCCAAGGCCGATGTCGAGGCAGTGTTGGCCAGTGCCGGCGCCCTCGGCGACTTCAGCTTCGTGCCCGGTGAGCACCCGGCGCTGCACCCGGGGCAGACCGCGCGCATCGAGCGGGAAGGGCGGCTGGTCGGCTACCTGGGCGCGCTGCATCCGGAACTGGCGAAGAAACTCGACCTCGAGCAGCCGGTGTTCCTCTTCGAGCTGCTGTTGGCCGAAGTGGTCGACGGCCACCTGCCGAAGTTCCGCGAGCTGTC
SST-29	Pseudomonas aeruginosa L00-a;Pseudomonas aeruginosa PA790;Pseudomonas aeruginosa PSE6684;Pseudomonas aeruginosa ST773;Pseudomonas aeruginosa 60503;Pseudomonas aeruginosa NCTC13715	GCGTGGACTTCTTCGACGCCAAGGCCGATGTCGAGGCAGTGCTGGCCAGTGCCGGCGCCCTCGGCGACTTCAGCTTCGTGCCCGGTGAGCACCCGGCGCTGCACCCGGGGCAGACCGCGCGCATCGAGCGGGACGGGCGGCTGGTCGGCTACCTGGGCGCGCTGCATCCGGAACTGGCGAAGAAACTCGACCTCGAGCAGCCGGTGTTCCTCTTCGAACTGCTGTTGGCCGAAGTGGTCGACGGTCACCTGCCGAAGTTCCGCGAGCTGTC
SST-30	Pseudomonas aeruginosa VRFPA04;Pseudomonas aeruginosa KC-Tt-1;Pseudomonas aeruginosa B136-33	GCGTGGACTTCTTCGACGCCAAGGCCGATGTCGAGGCAGTGCTGGCCAGTGCCGGCGCCCTCGGCGACTTCAGTTTCGTGCCCGGTGAGCACCCGGCGCTGCACCCGGGGCAGACCGCGCGCATCGAGCGGGACGGGCGGCTGGTCGGCTACCTGGGCGCGCTGCATCCGGAACTGGCGAAGAAACTCGACCTCGAGCAGCCGGTGTTCCTCTTCGAGCTGCTGCTGGCCGAAGTGGTCGACGGCCACCTGCCGAAGTTCCGCGAGCTGTC
SST-31	Pseudomonas aeruginosa YD001;Pseudomonas aeruginosa PACS2;Pseudomonas aeruginosa H20;Pseudomonas aeruginosa SG17M;Pseudomonas aeruginosa E125;Pseudomonas aeruginosa DVT423;Pseudomonas aeruginosa NCTC13620;Pseudomonas aeruginosa H26027;Pseudomonas aeruginosa W36662;Pseudomonas aeruginosa early NN2;Pseudomonas aeruginosa CMC-097;Pseudomonas aeruginosa PABCH45;Pseudomonas aeruginosa E90;Pseudomonas …	GCGTGGACTTCTTCGACGCCAAGGCCGATGTCGAGGCAGTGCTGGCCAGTGCCGGTGCCCTCGGCGACTTCAGCTTCGTGCCCGGCGAGCACCCGGCGCTGCACCCGGGGCAGACCGCGCGCATCGAGCGGGACGGGCGGCTGGTCGGCTACCTGGGCGCGCTGCATCCGGAACTGGCGAAGAAACTCGACCTCGAGCAGCCGGTGTTCCTCTTCGAGCTGCTGTTGGCCGAAGTGGTCGACGGTCACCTGCCGAAGTTCCGCGAGCTGTC
SST-32	Pseudomonas aeruginosa H5708	GCGTGGACTTCTTCGACGCCAAGGCCGATGTCGAGGCAGTGCTGGCCAGTGCCGGCGCCCTCGGCGACTTCAGCTTCGTGCCCGGTGAGCACCCGGCGCTGCACCCGGGGCAGACCGCACGCATCGAGCGGGAAGGGCGGCTGGTCGGCTACCTGGGTGCGCTACATCCGGAATTGGCGAAGAAACTCGACCTTGAGCAGCCGGTGTTCCTCTTCGAGCTGCTGCTGGCCGAAGTGGTCGACGGCCACCTGCCGAAGTTCCGCGAGCTGTC
SST-33	Pseudomonas aeruginosa H09	GCGTGGACTTCTTCGACGCCAAGGCCGATGTCGAGGCAGTGCTGGCCAGTGCCGGTGCCCTCGGCGACTTCAGCTTCGTGCCCGGCGAGCACCCGGCGCTGCACCCGGGGCAGACCGCACGCATCGAGCGGGAAGGGCGGCTGGTCGGCTACCTGGGCGCGCTGCATCCGGAACTGGCGAAGAAGCTCGACCTCGAGCAGCCGGTGTTCCTCTTCGAGCTGCTGTTGGCCGAAGTGGTCGACGGCCATCTGCCGAAGTTCCGCGAGCTGTC
SST-34	Pseudomonas aeruginosa LYSZa2;Pseudomonas aeruginosa LYSZa5;Pseudomonas aeruginosa DJ06;Pseudomonas aeruginosa ACR22;Pseudomonas aeruginosa ACR20;Pseudomonas aeruginosa B18	GCGTGGACTTCTTCGACGCCAAAGCCGATGTCGAGGCAGTGCTGGCCAGTGCCGGCGCCCTCGGCGACTTCAGCTTCGTGCCCGGTGAGCACCCGGCGCTGCACCCGGGGCAGACCGCGCGCATCGAGCGGGACGGGCGGCTGGTCGGCTACCTGGGCGCGCTGCATCCGGAACTGGCGAAGAAACTCGACCTCGAGCAGCCGGTGTTCCTCTTCGAGCTGCTGTTGGCCGAAGTGGTCGACGGCCACCTGCCGAAGTTCCGCGAGCTGTC
SST-35	Pseudomonas aeruginosa D5;Pseudomonas aeruginosa PABCH05;Pseudomonas aeruginosa AR_460	GCGTGGACTTCTTCGACGCCAAGGCCGATGTCGAGGCAGTGCTGGCCAGTGCCGGCGCCCTCGGCGACTTCAGCTTCGTGCCCGGCGAGCACCCGGCGCTGCATCCGGGGCAGACCGCGCGCATCGAGCGGGAAGGGCGGCTGGTCGGCTACCTGGGCGCGCTGCATCCGGAACTGGCGAAGAAACTCGACCTCGAGCAGCCGGTGTTCCTCTTCGAGCTGCTGCTGGCCGAAGTGGTCGACGGCCACCTGCCGAAGTTCCGCGAGCTGTC
SST-36	Pseudomonas aeruginosa Pa84	GCGTGGACTTCTTCGACGCCAAGGCCGATGTCGAGGCAGTGCTGGCCAGTGCCGGCGCCCTCGGCGACTTCAGTTTCGTGCCCGGTGAGCACCCGGCGCTGCACCCGGGGCAGACCGCGCGCATCGAGCGGGACGGGCGGCTGGTCGGCTACCTGGGCGCGCTGCATCCGGAACTGGCGAAGAAACTCGACCTCGAGCAGCCGGTGTTCCTCTTCGAGCTGCTGTTGGCCGAAGTGGTCGATGGTCACCTGCCGAAGTTCCGCGAGCTGTC
SST-37	Pseudomonas aeruginosa MINF_3A-sc-2280432;Pseudomonas aeruginosa ZBX-P13;Pseudomonas aeruginosa B17932;Pseudomonas aeruginosa B17416;Pseudomonas aeruginosa PA179;Pseudomonas aeruginosa GIMC5034:PA52Ts32;Pseudomonas aeruginosa GIMC5021:PA52Ts17;Pseudomonas aeruginosa GIMC5020:PA52Ts2;Pseudomonas aeruginosa GIMC5019:PA52Ts1;Pseudomonas aeruginosa GIMC5016:PA1840;Pseudomonas aeruginosa SP4527;Pseudo…	GCGTGGACTTCTTCGACGCCAAGGCCGATGTCGAGGCAGTGCTGGCCAGTGCCGGTGCCCTCGGCGACTTCAGCTTCGTGCCCGGCGAGCACCCGGCGCTACACCCGGGGCAGACCGCGCGCATCGAGCGGGAAGGGCGGCTGGTCGGCTACCTGGGCGCGCTGCATCCGGAACTGGCGAAGAAACTCGACCTCGAGCAGCCGGTGTTCCTCTTCGAGCTGCTGTTGGCCGAAGTGGTCGACGGCCACCTGCCGAAGTTCCGCGAGCTGTC
SST-38	Pseudomonas aeruginosa PA1609	GCGTGGACTTCTTCGACGCCAAGGCCGATGTCGAGGCAGTGCTGGCCAGTGCCGGTGCCCTCGGCGACTTCAGCTTCGTGCCCGGCGAGCACCCGGCGCTGCACCCGGGGCAGACCGCGCGCATCGAGCGGGACGGGCGGCTGGTCGGCTGCCTGGGCGCGCTGCATCCGGAACTGGCGAAGAAGCTCGACCTCGAGCAGCCGGTGTTCCTCTTCGAGCTGCTGCTGGCCGAAGTAGTCGACGGCCACCTGCCGAAGTTCCGCGAGCTGTC
SST-39	Pseudomonas aeruginosa H06;Pseudomonas aeruginosa ISS SRV-K	GCGTGGACTTCTTCGACGCCAAGGCCGATGTCGAGGCAGTGCTGGCCAGTGCCGGCGCCCTCGGCGACTTCAGCTTCGTGCCCGGTGAGCACCCGGCGCTGCACCCGGGGCAGACCGCGCGCATCGAGCGGGACGGGCGGCTGGTCGGCTACCTGGGCGCGCTGCATCCGGAACTGGCGAAGAAACTCGACCTCGAGCAGCCGGTGTTCCTCTTCGAGCTGCTGTTGGCCGAAGTGGTCGACGGTCACCTGCCGAAGTTCCGCGAGCTGTC
SST-40	Pseudomonas aeruginosa H17	GCGTGGACTTCTTCGACGCCAAAGCCGATGTCGAGGCAGTGCTGGCCAGTGCCGGTGCCCTCGGCGACTTCAGCTTCGTGCCCGGCGAGCACCCGGCGCTGCACCCGGGGCAGACCGCGCGCATCGAGCGGGACGGGCGGCTGGTCGGCTACCTGGGCGCGCTGCATCCGGAACTGGCGAAGAAACTCGACCTCGAGCAGCCGGTGTTCCTCTTCGAGCTGCTGTTGGCCGAAGTGGTCGACGGCCACCTGCCGAAGTTCCGCGAGCTGTC
SST-41	Pseudomonas aeruginosa LS.2c;Pseudomonas aeruginosa H16;Pseudomonas aeruginosa CCUG 70744;Pseudomonas aeruginosa H04;Pseudomonas aeruginosa Ps33;Pseudomonas aeruginosa 1811-18R001;Pseudomonas aeruginosa 1811-13R031;Pseudomonas aeruginosa AR442	GCGTGGACTTCTTCGACGCCAAGGCCGATGTCGAGGCAGTGCTGGCCAGTGCCGGCGCCCTCGGCGACTTCAGTTTCGTGCCCGGTGAGCACCCGGCGCTGCACCCGGGGCAGACCGCGCGCATCGAGCGGGACGGGCGGCTGGTCGGCTACCTGGGCGCGCTGCATCCGGAACTGGCGAAGAAACTCGACCTCGAGCAGCCGGTGTTCCTCTTCGAGCTGCTGTTGGCCGAAGTGGTCGACGGTCACCTGCCGAAGTTCCGCGAGCTGTC
SST-42	Pseudomonas aeruginosa S-1;Pseudomonas aeruginosa AA43;Pseudomonas aeruginosa AA2;Pseudomonas aeruginosa T2101;Pseudomonas aeruginosa PABL012	GCGTGGACTTCTTCGACGCCAAGGCCGATGTCGAGGCAGTGCTGGCCAGTGCCGGCGCCCTCGGCGACTTCAGCTTCGTGCCCGGCGAGCACCCGGCGCTGCACCCGGGGCAGACCGCACGCCTCGAGCGGGAAGGGCGGCTAGTCGGCTACCTGGGTGCGCTGCATCCGGAACTGGCGAAGAAACTCGACCTCGAGCAGCCGGTGTTCCTCTTCGAGCTGCTGTTGGCCGAAGTGGTCGACGGTCACCTGCCGAAGTTCCGCGAGCTGTC
SST-43	Pseudomonas aeruginosa mPA08-31;Pseudomonas aeruginosa DVT421	GCGTGGACTTCTTCGACGCCAAGGCCGATGTCGAGGCAGTGCTGGCCAGTGCCGGCGCCCTCGGCGACTTCAGCTTCGTGCCCGGCGAGCACCCGGCGCTGCACCCGGGGCAGACCGCACGCATCGAGCGGGAAGGGCGGCTGGTCGGCTACCTGGGTGCGCTGCATCCGGAACTGGCGAAGAAACTCGACCTCGAGCAGCCGGTGTTCCTCTTCGAGCTGCTGTTGGCCGAAGTGGTCGACGGTCACCTGCCGAAGTTCCGCGAGCTGTC
SST-44	Pseudomonas aeruginosa PAC6;Pseudomonas aeruginosa UNC_PaerCF38;Pseudomonas aeruginosa JB2	GCGTGGACTTCTTCGACGCCAAGGCCGATGTCGAGGCAGTGCTGGCCAGTGCCGGTGCCCTCGGCGACTTCAGCTTCGTGCCCGGCGAGCACCCGGCGCTGCACCCGGGGCAGACCGCGCGCATCGAGCGGGACGGGCGGCTGGTCGGCTACCTGGGCGCGCTGCATCCGGAACTGGCGAAGAAACTCGATCTCGAGCAGCCGGTGTTCCTCTTCGAGCTGCTGTTGGCCGAAGTGGTCGACGGTCACCTGCCGAAGTTCCGCGAGCTGTC
SST-45	Pseudomonas aeruginosa K19PSE24;Pseudomonas aeruginosa BAMC 07-48	GCGTGGACTTCTTCGACGCCAAGGCCGATGTCGAGGCAGTGCTGGCCAGTGCCGGCGCCCTCGGCGACTTCAGCTTCGTGCCCGGTGAGCACCCGGCGCTGCACCCGGGGCAGACCGCGCGCATCGAGCGGGAAGGGCGGCTGGTCGGCTACCTGGGCGCGCTGCATCCGGAACTGGCGAAGAAACTCGACCTCGAGCAGCCGGTGTTCCTCTTCGAGCTGCTGTTGGCCGAAGTGGTCGACGGTCACCTGCCGAAGTTCCGCGAGCTGTC
SST-46	Pseudomonas aeruginosa PB368;Pseudomonas aeruginosa PB369	GCGTGGACTTCTTCGACGCCAAGGCCGATGTCGAGGCAGTGCTGGCCAGTGCCGGCGCCCTCGGCGACTTCAGTTTCGTGCCCGGTGAGCACCCGGCGCTGCACCCGGGGCAGACCGCGCGCATCGAGCGGGACGGGCGGCTGGCCGGCTACCTGGGCGCGCTGCATCCGGAACTGGCGAAGAAACTCGACCTCGAGCAGCCGGTGTTCCTCTTCGAGCTGCTGCTGGCCGAAGTGGTCGACGGCCACCTGCCGAAGTTCCGCGAGCTGTC
SST-47	Pseudomonas aeruginosa PcyII-10;Pseudomonas aeruginosa HU20	GCGTGGACTTCTTCGACGCCAAAGCCGATGTCGAGGCAGTGCTGGCCAGTGCCGGCGCCCTCGGCGACTTCAGCTTCGTGCCCGGCGAGCACCCGGCGCTGCACCCGGGGCAGACCGCACGCATCGAGCGGGACGGGCGGCTGGTCGGCTACCTGGGTGCGCTGCATCCGGAACTGGCGAAGAAACTCGACCTCGAGCAGCCGGTGTTCCTCTTCGAGCTGCTGTTGGCCGAAGTGGTCGACGGTCACCTGCCGAAGTTCCGCGAGCTGTC
SST-48	Pseudomonas aeruginosa LESlike1;Pseudomonas aeruginosa LESB65;Pseudomonas aeruginosa LES431;Pseudomonas aeruginosa LESB58	GCGTGGACTTCTTCGACGCCAAGGCCGATGTCGAGGCAGTGCTGGCCAGTGCCGGCGCCCTCGGCGACTTCAGCTTCGTGCCCGGCGAGCACCCGGCGCTGCACCCGGGGCAGACCGCACGCATCGAGCGGGAAGGGCGGCTGGTCGGCTACCTGGGTGCGCTGCATCCGGAACTGGCGAAGAAACTCGACCTCGAGCAGCCGGTGCTCCTCTTCGAGCTGCTGTTGGCCGAAGTGGTCGACGGTCACCTGCCGAAGTTCCGCGAGCTGTC
SST-49	Pseudomonas aeruginosa MTB-1	GCGTGGACTTCTTCGACGCCAAGGCCGATGTCGAGGCAGTGCTGGCCAGTGCCGGCGCCCTCGGCGACTTCAGCTTCGTGCCCGGTGAGCACCCGGCGCTGCACCCGGGGCAGACCGCGCGCATCGAGCGGGAAGGGCGGCTGGTCGGCTACCTGGGTGCGCTACATCCGGAACTGGCGAAGAAACTCGACCTCGAGCAGCCGGTGTTCCTCTTCGAGCTGCTGTTGGCCGAAGTGGTCGACGGCCACCTGCCGAAGTTCCGCGAGCTGTC
SST-50	Pseudomonas aeruginosa US449	GCGTGGACTTCTTCGACGCCAAGGCCGATGTCGAGGCAGTGCTGGCCAGTGCCGGCGCCCTCGGCGACTTCAGCTTCGTGCCCGGCGAGCACCCGGCGCTGCACCCAGGGCAGACCGCGCGCATCGAGCGGGAAGGGCGGCTGGTCGGCTACCTGGGCGCGCTGCATCCGGAACTGGCGAAGAAACTCGACCTCGAGCAGCCGGTGTTCCTCTTCGAGCTGCTGCTGGCCGAAGTGGTCGACGGTCACCTGCCGAAGTTCCGCGAGCTGTC
SST-51	Pseudomonas aeruginosa AR19438;Pseudomonas aeruginosa PA0523;Pseudomonas aeruginosa H47921	GCGTGGACTTCTTCGACGCCAAGGCCGATGTCGAGGCAGTGCTGGCCAGTGCCGGCGCCCTCGGCGACTTCAGTTTCGTGCCCGGTGAGCACCCGGCGCTGCACCCGGGGCAGACCGCGCGCATCGAGCGGGACGGGCGGCTGGTCGGCTATCTGGGCGCGCTGCATCCGGAACTGGCGAAGAAACTCGACCTCGAGCAGCCGGTGTTCCTCTTCGAGCTGCTGCTGGCCGAAGTGGTCGACGGCCACCTGCCGAAGTTCCGCGAGCTGTC
SST-52	Pseudomonas aeruginosa JNQH-PA033;Pseudomonas aeruginosa NRD619;Pseudomonas aeruginosa HOU1	GCGTGGACTTCTTCGACGCCAAGGCCGATGTCGAGGCAGTGCTGGCCAGTGCCGGTGCCCTCGGCGACTTCAGCTTCGTGCCCGGCGAGCACCCGGCGCTGCACCCGGGGCAGACCGCGCGCATCGAGCGGGAAGGGCGGCTGGTCGGCTACCTGGGCGCGCTGCATCCGGAATTGGCGAAGAAACTCGACCTCGAGCAGCCGGTGTTCCTCTTCGAGCTGCTGCTGGCCGAAGTGGTCGACGGCCACCTGCCGAAGTTCCGCGAGCTGTC
SST-53	Pseudomonas aeruginosa LYSZa7	GCGTGGACTTCTTCGACGCCAAAGCCGATGTCGAGGCAGTGCTGGCCAGTGCCGGCGCCCTCGGCGACTTCAGCTTCGTGCCCGGCGAGCACCCGGCGCTACACCCGGGGCAGACCGCGCGCATCGAGCGGGAAGGGCGGCTGGTCGGCTACCTGGGCGCGCTGCATCCGGAACTGGCGAAGAAACTCGACCTCGAGCAGCCGGTGTTCCTCTTCGAGCTGCTGTTGGCCGAAGTGGTCGACGGCCACCTGCCGAAGTTCCGCGAGCTGTC
SST-54	Pseudomonas aeruginosa A17CT	GCGTGGACTTCTTCGACGCCAAGGCCGATGTCGAGGCAGTGCTGGCCAGTGCTGGTGCCCTCGGTGACTTCAGCTTCGTGCCCGGTGAGCACCCGGCGCTGCACCCGGGGCAGACCGCACGCATCGAGCGGGAAGGGCGGCTGGTCGGCTACCTGGGTGCGCTACATCCGGAATTGGCGAAGAAACTCGACCTCGAGCAGCCGGTGTTCCTCTTCGAGCTGTTGCTGGCCGAAGTGGTCGACGGCCACCTGCCGAAGTTCCGCGAGCTGTC
SST-55	Pseudomonas aeruginosa P16CT;Pseudomonas aeruginosa PA-VAP-2;Pseudomonas aeruginosa SCV20265	GCGTGGACTTCTTCGACGCCAAGGCCGATGTCGAGGCAGTGCTGGCCAGTGCCGGCGCCCTCGGCGACTTCAGCTTCGTGCCCGGTGAGCACCCGGCGCTGCACCCGGGGCAGACCGCGCGCATCGAGCGGGACGGGCGGCTGGTCGGCTACCTGGGCGCGCTGCATCCGGAACTGGCGAAGAAACTCGACCTCGAGCAGCCGGTGTTCCTCTTCGAGCTGCTGCTGGCCGAAGTGGTCGACGGCCACCTGCCGAAGTTCCGCGAGCTGTC
SST-56	Pseudomonas aeruginosa A5803;Pseudomonas aeruginosa H08	GCGTGGACTTCTTCGACGCCAAGGCCGATGTCGAGGCAGTGCTGGCCAGTGCCGGCGCCCTCGGCGACTTCAGCTTCGTGCCCGGTGAGCACCCGGCGCTGCACCCGGGGCAGACCTCGCGCATCGAGCGGGAAGGGCGGCTGGTCGGCTACCTGGGTGCGCTGCATCCGGAACTGGCCAAGAAACTCGACCTCGAGCAGCCGGTGTTCCTCTTCGAGCTGCTGTTGGCCGAAGTGGTCGACGGTCACCTGCCGAAGTTCCGCGAGCTGTC
SST-57	Pseudomonas aeruginosa ZS-PA-05;Pseudomonas aeruginosa PABCH10	GCGTGGACTTCTTCGACGCCAAGGCCGATGTCGAGGCAGTGCTGGCCAGTGCCGGTGCCCTCGGCGACTTCAGCTTCGTGCCCGGCGAGCACCCGGCGCTGCACCCGGGGCAGGCCGCGCGCATCGAGCGGGAAGGGCGGCTGGTCGGCTACCTGGGTGCGCTGCATCCGGAACTGGCGAAGAAACTCGACCTCGAGCAGCCGGTGTTCCTCTTCGAGCTGCTGTTGGCCGAAGTGGTCGACGGTCACCTGCCGAAGTTCCGCGAGCTGTC
SST-58	Pseudomonas aeruginosa TJ2014-049	GCGTGGACTTCTTCGACGCCAAGGCCGATGTCGAGGCAGTGCTGGCCAGTGCCGGTGCCCTCGGCGACTTCAGCTTCGTGCCCGGCGAGCACCCGGCGCTGCACCCGGGGCAGACCGCGCGCATCGAGCGGGACGGGCGGCTGGTCGGCTACCTGGGCGCGCTACATCCGGAACTGGCGAAGAAACTCGACCTCGAGCAGCCGGTGTTCCTCTTCGAGCTGCTGCTGGCCGAAGTGGTCGACGGTCACCTGCCGAAGTTCCGCGAGCTGTC
SST-59	Pseudomonas aeruginosa CMC-115	GCGTGGACTTCTTCGACGCCAAGGCCGATGTCGAGGCAGTGCTGGCCAGTGCTGGTGCCCTCGGCGACTTCAGCTTCGTGCCTGGCGAGCACCCGGCGCTGCACCCGGGGCAGACCGCACGCATCGAGCGGGAAGGGCGGCTGGTCGGCTACCTGGGTGCGCTACATCCGGAACTGGCGAAGAAACTCGACCTCGAGCAGCCGGTGTTCCTCTTCGAGCTGCTGCTGGCTGAAGTGGTCGACGGCCACCTGCCGAAGTTCCGCGAGCTGTC
SST-60	Pseudomonas aeruginosa IMP-13;Pseudomonas aeruginosa 6762;Pseudomonas aeruginosa ZPPH1;Pseudomonas aeruginosa ZPPH2;Pseudomonas aeruginosa ZPPH33;Pseudomonas aeruginosa F092021;Pseudomonas aeruginosa PA3	GCGTGGACTTCTTCGACGCCAAGGCCGATGTCGAGGCGGTGCTGGCCAGTGCCGGCGCCCTCGGCGACTTCAGCTTCGTGCCCGGTGAGCACCCGGCGCTGCACCCGGGGCAGACCGCGCGCATCGAGCGGGACGGGCGGCTGGTCGGCTACCTGGGCGCGCTGCATCCGGAATTGGCGAAGAAACTCGACCTCGAGCAGCCGGTGTTCCTCTTCGAGCTGCTGCTGGCCGAAGTGGTCGACGGCCACCTGCCGAAGTTCCGCGAGCTGTC
SST-61	Pseudomonas aeruginosa PB354;Pseudomonas aeruginosa PB353	GCGTGGACTTCTTCGACGCCAAGGCCGATGTCGAGGCAGTGCTGGCCAGTGCCGGTGCCCTCGGCGACTTCAGCTTCGTGCCCGGCGAGCACCCGGCGCTGCACCCGGGGCAGACCGCGCGCATCGAGCGGGAAGGGCGGCTGGTCGGCTACCTGGGTGCGCTGCATCCGGAACTGGCGAAGAAACTCGACCTCGAGCAGCCGGTGTTCCTCTTCGAGCTGCTGCTGGCCGAAGTGGTCGACGGCCAGCTGCCGAAGTTCCGCGAGCTGTC
SST-62	Pseudomonas aeruginosa PA_154197	GCGTGGACTTCTTCGACGCCAAGGCCGATGTCGAGGCAGTGCTGGCCAGTGCCGGTGCCCTCGGCGACTTCAGCTTCGTGCCCGGCGAGCACCCGGCGCTGCACCCGGGGCAGACCGCGCGCATCGAGCGGGAAGGGCGGCTGGTCGGCTACCTGGGTGCGCTGCATCCGGAACTGGCGAAGAAACTCGACCTCGAGCAGCCGGTGTTCCTCTTCGAGCTGCTGCTGGCCGAAGTGGTCGACGGCCACCTGCCGAAGTTCCGCGAGCTGTC
SST-63	Pseudomonas aeruginosa IOMTU 133	GCGTGGACTTCTTCGACGCCAAGGCCGATGTTGAGGCAGTGCTGGCCAGTGCCGGTGCCCTCGGCGACTTCAGCTTCGTGCCCGGCGAGCACCCGGCGTTACACCCGGGGCAGACCGCGCGCATCGAGCGGGACGGGCGGCTGGTCGGCTACCTGGGCGCGCTGCATCCGGAACTGGCGAAGAAGCTCGACCTCGAGCAGCCGGTGTTCCTCTTCGAGCTGCTGCTGGCCGAAGTAGTCGACGGCCACCTGCCGAAGTTCCGCGAGCTGTC
SST-64	Pseudomonas aeruginosa R20-14	GCGTGGACTTCTTCGACGCCAAGGCCGATGTCGAAGCAGTGCTGGCCAGTGCCGGTGCCCTCGGCGACTTCAGCTTCGTGCCCGGCGAGCACCCGGCGCTGCACCCGGGGCAGACCGCACGCATCGAGCGGGACGGGCGGCTGGTCGGCTACCTGGGCGCGCTACATCCGGAACTGGCGAAGAAACTCGACCTCGAGCAGCCGGTGTTCCTCTTCGAGCTGCTGCTGGCCGAAGTGGTCGACGGTCACCTGCCGAAGTTCCGCGAGCTGTC
SST-65	Pseudomonas aeruginosa UNC_PaerCF25	GCGTGGACTTCTTCGACGCCAAGGCCGATGTCGAGGCAGTGCTGGCCAGTGCCGGTGCCCTCGGCGACTTCAGCTTCGTGCCCGGCGAGCACCCGGCGCTGCACCCGGGGCAGACCGCGCGCATCGAGCGGGACGGGCGGCTGGTCGGCTACCTGGGCGCGCTGCATCCGGAACTGGCGAAGAAACTCGATCTCGAGCAGCCGGTGTTCCTCTTCGAGCTGCTGTTGGCCAAAGTGGTCGACGGTCACCTGCCGAAGTTCCGCGAGCTGTC
SST-66	Pseudomonas aeruginosa ST1076_d100blood2;Pseudomonas aeruginosa ST1076_d97burn1;Pseudomonas aeruginosa ST1076_d97burn2;Pseudomonas aeruginosa ST1076_d100blood1;Pseudomonas aeruginosa ST1076_d118limb1;Pseudomonas aeruginosa St1076_d123blood;Pseudomonas aeruginosa H25883	GCGTGGACTTCTTCGACGCCAAGGCCGATGTCGAGGCAGTGCTGGCCAGTGCCGGCGCCCTCGGCGACTTCAGCTTCGTGCCCGGTGAGCACCCGGCGCTGCACCCGGGGCAGACCGCGCGCATCGAGCGGGAAGGGCGGCTGGTCGGCTACCTGGGTGCGCTGCATCCGGAACTGGCGAAGAAACTCGACCTCGAGCAGCCGGTGTTCCTCTTCGAGCTGCTGTTGGCCGAAGTGGTCGACGGTCACCTGCCGAAGTTCCGCGAGCTGTC
SST-67	Pseudomonas aeruginosa PA8329;Pseudomonas aeruginosa NCTC13359;Pseudomonas aeruginosa FDAARGOS_610;Pseudomonas aeruginosa PRD-10	GCGTGGACTTCTTCGACGCCAAGGCCGATGTCGAGGCAGTGCTGGCCAGTGCTGGTGCCCTCGGCGACTTCAGCTTCGTGCCCGGCGAGCACCCGGCGCTGCACCCGGGGCAGACCGCACGCATCGAGCGGGAAGGGCGGCTGGTCGGCTACCTGGGTGCGCTACATCCGGAATTGGCGAAGAAACTCGATCTCGAGCAGCTGGTGTTCCTCTTCGAGCTGCTGCTGGCCGAAGTGGTCGACGGCCACCTGCCGAAGTTCCGCGAGCTGTC
SST-68	Pseudomonas aeruginosa HS17-127	GCGTGGACTTCTTCGACGCCAAGGCCGATGTCGAGGCAGTGCTGGCCAGTGCCGGCGCCCTCGGCGACTTCAGCTTCGTGCCCGGCGAGCACCCGGCGCTGCACCCGGGGCAGACCGCGCGCATCGAGAGGGACGGGCGGCTGGTCGGCTACCTGGGCGCGCTGCATCCGGAACTGGCGAAGAAACTCGACCTGGAGCAGCCGGTGTTCCTCTTCGAGCTGCTGTTGGCCGAAGTGGTCGACGGCCACCTGCCGAAGTTCCGCGAGCTGTC
SST-69	Pseudomonas aeruginosa PA-VAP-1	GCGTGGACTTCTTCGACGCCAAGGCCGATGTCGAGGCAGTGCTGGCCAGTGCCGGCGCCCTCGGCGACTTCAGCTTCGTGCCCGGCGAGCACCCGGCGCTGCACCCGGGGCAGACCGCGCGCATCGAGCGGGAAGGGCGGCTGGTCGGCTACCTGGGCGCGCTGCATCCGGAACTGACGAAGAAACTCGACCTCGAGCAGCCGGTGTTCCTCTTCGAGCTGCTGCTGGCCGAAGTGGTCGACGGCCACCTGCCGAAGTTCCGCGAGCTGTC
SST-70	Pseudomonas aeruginosa CHA;Pseudomonas aeruginosa H15;Pseudomonas aeruginosa WTJH17;Pseudomonas aeruginosa PA59;Pseudomonas aeruginosa PAER4_119	GCGTGGACTTCTTCGACGCCAAGGCCGATGTCGAGGCAGTGCTGGCCAGTGCCGGTGCCCTCGGCGACTTCAGCTTCGTGCCCGGCGAGCACCCGGCGCTGCACCCGGGGCAGACCGCGCGCATCGAGCGGGAAGGGCGGCTGGTCGGCTACCTGGGCGCGCTGCATCCGGAACTGGCGAAGAAACTCGACCTCGAGCAGCCGGTGTTCCTATTCGAGCTGCTGCTGGCCGAAGTGGTCGACGGCCACCTGCCGAAGTTCCGCGAGCTGTC
SST-71	Pseudomonas aeruginosa NCCP15783;Pseudomonas aeruginosa PA298;Pseudomonas aeruginosa E80;Pseudomonas aeruginosa Y71;Pseudomonas aeruginosa WCHPA075019;Pseudomonas aeruginosa Y89;Pseudomonas aeruginosa Pa1242;Pseudomonas aeruginosa PA1088;Pseudomonas aeruginosa PA7790;Pseudomonas aeruginosa PA8281;Pseudomonas aeruginosa PA11803;Pseudomonas aeruginosa 19BR	GCGTGGACTTCTTCGACGCCAAGGCCGATGTCGAGGCAGTGCTGGCCAGTGCTGGTGCCCTCGGCGACTTCAGCTTCGTGCCCGGCGAGCACCCGGCGCTGCACCCGGGGCAGACCGCGCGCATCGAGCGGGAAGGGCGGCTGGTCGGCTACCTGGGTGCGCTACATCCGGAACTGGCGAAGAAACTCGACCTCGAGCAGCCGGTGTTCCTCTTCGAGCTGCTGTTGGCCGAAGTGGTCGACGGTCACCTGCCGAAGTTCCGCGAGCTGTC
SST-72	Pseudomonas aeruginosa YTSY4	GCGTGGACTTCTTCGACGCCAAGGCCGATGTCGAGGCAGTGCTGGCCAGTGCCGGTGCCCTCGGCGACTTCAGCTTCGTGCCCGGCGAGCACCCGGCGCTGCACCCGGGGCAGACCGCGCGCATCGAGCGGGAAGGGCGGCTGGTCGGCTACCTGGGTGCGCTGCATCCGGAACTGGCGAAGAAACTCGACCTCGAACAGCCGGTGTTCCTCTTCGAGCTGCTGTTGGCCGAAGTGGTCGACGGTCACCTGCCGAAGTTCCGCGAGCTGTC
SST-73	Pseudomonas aeruginosa UNC_PaerCF37	GCGTGGACTTCTTCGACGCCAAGGCCGATGTCGAGGCAGTGCTGGCCAGTGCCGGCGCCCTCGGCGACTTCAGCTTCGTGCCCGGTGAGCACCCGGCGCTGCACCCGGGGCAGACCGCACGCATCGAGCGGGAAGGGCGGCTGGTCGGCTACCTGGGTGCGCTACATCCGGAATTGGCGAAGAAACTCGACCTCGAGCAGCCGGTGTTCCTCTTCGAGCTGCTGCTGGCCGAAGTGGTCGACGGCCACCTGCCGAAGTTCCGCGAGCTGTC
SST-74	Pseudomonas aeruginosa PARM801	GCGTGGACTTCTTCGACGCCAAGGCCGATGTCGAGGCAGTGCTGGCCAGTGCTGGTGCCCTCGGTGACTTCAGCTTCGTGCCCGGCGAGCACCCGGCGCTGCACCCGGGGCAGACCGCACGCATCGAGCGGGAAGGGCGGCTGGTCGGCTACCTGGGTGCGCTACATCCGGAATTGGCGAAGAAACTCGACCTCGAGCAGCCGGTGTTCCTCTTCGAGCTGCTGTTGGCCGAAGTGGTCGACGGCCACCTGCCGAAGTTCCGCGAGCTGTC
SST-75	Pseudomonas aeruginosa USDA-ARS-USMARC-41639	GCGTGGACTTCTTCGACGCCAAGGCCGATGTCGAGGCAGTGCTGGCCAGTGCCGGCGCCCTCGCCGACTTCAGCTTCGTGCCCGGTGAGCACCCGGCGCTGCACCCGGGGCAGACCGGGCGCATCGAGCGGGACGGGCGACTGGTCGGCTACCTGGGCGCGCTGCATCCGGAACTGGCGAAGAAGCTCGACCTCGAGCAGCCGGTGTTCCTCTTCGAGCTGCTGCTGGCCGAAGTGGTCGACGGCCACCTGCCGAAGTTCCGCGAGCTGTC
SST-76	Pseudomonas aeruginosa PAO1H2O	GCGTGGACTTCTTCGACGCCAAGGCCGATGTCGAGGCAGTGCTGGCCAGTGCNGGNGCCCTCGGCGACTTCAGCTTCGTGCCCGGCGAGCACCCGGCGCTGCACCCGGGGCAGACCGCNCGCATCGAGCGGGACGGGCGGCTGGTCGGCTACCTGGGNGCGCTNCATCCGGAACTGGCGAAGAAACTCGACCTCGAGCAGCCGGTGTTCCTCTTCGAGCTGCTGTTGGCCGAAGTGGTCGACGGCCACCTGCCGAAGTTCCGCGAGCTGTC
SST-77	Pseudomonas aeruginosa PA1_NCHU;Pseudomonas aeruginosa YTSEY8;Pseudomonas aeruginosa YT12746	GCGTGGACTTCTTCGACGCCAAGGCCGATGTCGAGGCAGTGCTGGCCAGTGCCGGTGCCCTCGGCGACTTCAGCTTCGTGCCCGGCGAGCACCCGGCGCTACACCCGGGGCAGACCGCGCGCATCGAGCGGGACGGGCGGCTGGTCGGCTACCTGGGCGCGCTGCATCCGGAACTGGCGAAGAAACTCGATCTCGAGCAGCCGGTGTTCCTCTTCGAGCTGCTGTTGGCCGAAGTGGTCGACGGTCACCTGCCGAAGTTCCGCGAGCTGTC
SST-78	Pseudomonas aeruginosa Y31	GCGTGGACTTCTTCGACGCCAAGGCCGATGTCGAGGCAGTGCTGGCCAGTGCCGGCGCCCTCGGCGACTTCAGCTTCGTGCCCGGTGAGCACCCGGCGCTGCACCCGGGGCAGACCGCGCGCATCGAGCGGGACGGGCGGCTGGTCGGCTACCTGGGTGCGCTGCATCCGGAACTGGCGAAGAAACTCGACCTCGAGCAGCCGGTGTTCCTCTTCGAGCTGCTGTTGGCCGAAGTGGTCGACGGTCACCTGCCGAAGTTCCGCGAGCTGTC
SST-79	Pseudomonas aeruginosa DVT414	GCGCGGACTTCTTCGACGCCAAGGCCGATGTCGAGGCAGTGCTGGCCAGTGCTGGTGCCCTCGGCGACTTCAGCTTCGTGCCCGGCGAGCACCCGGCGCTGCACCCGGGGCAGACCGCACGCATCGAGCGGGAAGGGCGGCTGGTCGGCTACCTGGGTGCGCTACATCCGGAACTGGCGAAGAAACTCGACCTCGAGCAGCCGGTGTTCCTCTTCGAGCTGCTGCTGGCCGAAGTGGTCGACGGCCACCTGCCGAAGTTCCGCGAGCTGTC

## Sheet: Sheet5. sdaA database
ST-sdaA	Strains	Sequences
SST-1	Pseudomonas aeruginosa 12-4-4(59)	ATCGTCGAGGACCGCACGCCGCTGGCGTTCCCCTTCAAGACCGCGCGGCAACTGCTCGACCATTGCGCCCGCGAAGGCCTGTCGATCAGCCAGTTGATGGCCGAGAACGAGAAGGCCTGGCGCCCCGCCGAGGAAACCCGCACTGGCCTGCTGCGTATCTGGCAGGTGATGCAGGACTGCGTCGAGGCCGGCTGCCGCAACGAGGGCATCATGCCCGGCGGGCTGAAGGTCAGGCGCCGTGCGGCGGCGCTCCACCGCCAGTTGTGCCAGCGGCCGGAGGCCGGCCTGCGCGATGCCCTCAGCGTGCTCGACTGGGTCAACCTCTAC
SST-2	Pseudomonas aeruginosa F13	ATCGTCGAGGACCGCACGCCGCTGGCGTTCCCCTTCAAGACCGCGCGGCAACTGCTCGACCATTGCGTCCGCGAAGGCCTGTCGATCAGCCAGTTGATGGCCGAGAACGAGAAGGCCTGGCGCCCCGCCGAGGAAACCCGTGCCGGCCTGCTGCGTATCTGGCAGGTGATGCAGGACTGCGTCGAGGCCGGCTGCCGCAACGAGGGCATCATGCCCGGCGGACTGAAGGTCAGGCGCCGCGCGGCGGCGCTCCACCGCCAGTTGTGCCAGCGGCCGGAGGCCGGTCTGCGCGACGCCCTCAGCGTGCTCGACTGGGTCAACCTCTAC
SST-3	Pseudomonas aeruginosa 34Pae36;Pseudomonas aeruginosa HB2011305RE;Pseudomonas aeruginosa DL201330;Pseudomonas aeruginosa A-I-1;Pseudomonas aeruginosa AG1;Pseudomonas aeruginosa PA38182;Pseudomonas aeruginosa Y82;Pseudomonas aeruginosa RW109;Pseudomonas aeruginosa F5677;Pseudomonas aeruginosa AR445;Pseudomonas aeruginosa RIVM-EMC2982;Pseudomonas aeruginosa F30658;Pseudomonas aeruginosa Carb01 63;P…	ATCGTCGAGGACCGCACGCCGCTGGCGTTCCCCTTCAAGACCGCGCGGCAACTGCTCGACCATTGCGTCCGCGAAGGCCTGTCGATCAGCCAGTTGATGGCCGAGAACGAGAAGGCCTGGCGCCCCGCCGAGGAAACCCGCACCGGCCTGCTGCGTATCTGGCAGGTGATGCAGGACTGCGTCGAGGCCGGCTGCCGCAACGAGGGCATCATGCCCGGCGGGCTGAAGGTCAGGCGCCGTGCGGCGGCGCTCCACCGCCAGTTGTGCCAGCGGCCGGAGGCCGGCCTGCGCGATGCCCTCAGCGTGCTCGACTGGGTCAACCTCTAC
SST-4	Pseudomonas aeruginosa ATCC BAA-2108;Pseudomonas aeruginosa C-I-1;Pseudomonas aeruginosa DVT779;Pseudomonas aeruginosa X78812;Pseudomonas aeruginosa PAD8;Pseudomonas aeruginosa PABCH13;Pseudomonas aeruginosa PAG5;Pseudomonas aeruginosa PcyII-10;Pseudomonas aeruginosa DSM 50071;Pseudomonas aeruginosa PABCH05;Pseudomonas aeruginosa QZPH41;Pseudomonas aeruginosa IMP-13;Pseudomonas aeruginosa DK2;Pse…	ATCGTCGAGGACCGCACGCCGCTGGCGTTCCCCTTCAAGACCGCGCGGCAACTGCTCGACCATTGCGTCCGCGAAGGCCTGTCGATCAGCCAGTTGATGGCCGAGAACGAGAAGGCCTGGCGCCCCGCCGAGGAAACCCGTGCCGGCCTGCTGCGTATCTGGCAGGTGATGCAGGACTGCGTCGAGGCCGGCTGCCGCAACGAGGGCATCATGCCCGGCGGGCTGAAGGTCAGGCGCCGTGCGGCGGCGCTCCACCGCCAGTTGTGCCAGCGGCCGGAGGCCGGCCTGCGCGATGCCCTCAGCGTGCTCGACTGGGTCAACCTCTAC
SST-5	Pseudomonas aeruginosa H07;Pseudomonas aeruginosa ZPPH29;Pseudomonas aeruginosa PAAK088;Pseudomonas aeruginosa A681;Pseudomonas aeruginosa AR_458;Pseudomonas aeruginosa E113;Pseudomonas aeruginosa NDTH7329;Pseudomonas aeruginosa QZPH16;Pseudomonas aeruginosa QZPH21;Pseudomonas aeruginosa SRRSH1120;Pseudomonas aeruginosa SRRSH2790;Pseudomonas aeruginosa NDTH10366;Pseudomonas aeruginosa SRRSH1408;P…	ATCGTCGAGGACCGCACGCCGCTGGCGTTCCCCTTCAAGACCGCGCGGCAACTGCTCGACCATTGCGCCCGCGAAGGCCTGTCGATCAGCCAGTTGATGGCCGAGAACGAGAAGGCCTGGCGCCCCGCCGAGGAAACCCGCACCGGCCTGCTGCGTATCTGGCAGGTGATGCAGGACTGCGTCGAGGCCGGCTGCCGCAACGAGGGCATCATGCCCGGCGGGCTGAAGGTCAGGCGCCGTGCGGCGGCGCTCCACCGCCAGTTGTGCCAGCGGCCGGAGGCCGGCCTGCGCGATGCCCTCAGCGTGCTCGACTGGGTCAACCTCTAC
SST-6	Pseudomonas aeruginosa PES_P749;Pseudomonas aeruginosa H17;Pseudomonas aeruginosa YY322;Pseudomonas aeruginosa AR_0230;Pseudomonas aeruginosa PA83;Pseudomonas aeruginosa ZBX-P12;Pseudomonas aeruginosa CDN129;Pseudomonas aeruginosa CDN118;Pseudomonas aeruginosa AR_0111;Pseudomonas aeruginosa K34-7;Pseudomonas aeruginosa AR_0360;Pseudomonas aeruginosa AR444;Pseudomonas aeruginosa AR_0110;Pseudomona…	ATCGTCGAGGACCGCACGCCGCTGGCGTTCCCCTTCAAGACCGCGCGGCAACTGCTCGACCATTGTGTCCGCGAAGGCCTGTCGATCAGCCAGTTGATGGCCGAGAACGAGAAGGCCTGGCGCCCCGCCGAGGAAACCCGCGCCGGCCTGCTGCGTATCTGGCAGGTGATGCAGGATTGCGTCGAGGCCGGCTGCCGCAACGAGGGCATCATGCCCGGCGGACTGAAGGTCAGGCGCCGCGCGGCGGCGCTCCACCGCCAGTTGTGCCAGCGGCCAGAGGCCGGCCTGCGCGATGCTCTCAGCGTGCTCGACTGGGTCAACCTCTAC
SST-7	Pseudomonas aeruginosa A0002;Pseudomonas aeruginosa PA1RG;Pseudomonas aeruginosa PA1;Pseudomonas aeruginosa PA1R;Pseudomonas aeruginosa UNC_PaerCF34;Pseudomonas aeruginosa PA1_NCHU	ATCGTCGAGGACCGCACGCCGCTGGCGTTTCCCTTCAAGACCGCGCGGCAACTGCTCGACCATTGCGCCCGCGAAGGCCTGTCGATCAGCCAGTTGATGGCCGAGAACGAGAAGGCCTGGCGCCCCGCCGAGGAAACCCGCACCGGCCTGCTGCGTATCTGGCAGGTGATGCAGGACTGCGTCGAGGCCGGCTGCCGCAACGAGGGCATCATGCCCGGCGGGCTGAAGGTCAGGCGCCGTGCGGCGGCGCTCCACCGCCAGTTGTGCCAGCGGCCGGAGGCCGGCCTGCGCGATGCCCTCAGCGTGCTCGACTGGGTCAACCTCTAC
SST-8	Pseudomonas aeruginosa P93127;Pseudomonas aeruginosa P4970C;Pseudomonas aeruginosa 97	ATCGTCGAGGACCGCACGCCGCTGGCGTTCCCCTTCAAGACCGCGCGGCAGCTGCTCGACCATTGCGTCCGCGAAGGCCTGTCGATCAGCCAGTTGATGGCCGAGAACGAGAAGGCCTGGCGCCCCGCCGAGGAAACCCGTGCCGGCCTGCTGCGTATCTGGCAGGTGATGCAGGACTGCGTCGAGGCCGGCTGCCGCAACGAGGGCATCATGCCCGGCGGACTGAAGGTCAGGCGCCGTGCGGCGGCGCTCCACCGCCAGTTGTGCCAGCGGCCGGAGGCCGGTCTGCGCGACGCCCTCAGCGTGCTCGACTGGGTCAACCTCTAC
SST-9	Pseudomonas aeruginosa FAHZU40;Pseudomonas aeruginosa AJ D 2;Pseudomonas aeruginosa 1334/14;Pseudomonas aeruginosa ST167_d57blood;Pseudomonas aeruginosa ST167_d26burn;Pseudomonas aeruginosa ST167_d67burn2;Pseudomonas aeruginosa ST167_d68blood1;Pseudomonas aeruginosa ST167_d67burn1;Pseudomonas aeruginosa ST167_d68blood2;Pseudomonas aeruginosa F9676;Pseudomonas aeruginosa SG17M;Pseudomonas aerugino…	ATCGTCGAGGACCGCACGCCGCTGGCGTTCCCCTTCAAGACCGCGCGGCAACTGCTCGACCATTGCGTCCGCGAAGGCCTGTCGATCAGCCAGTTGATGGCCGAGAACGAGAAGGCCTGGCGCCCCGCCGAGGAAACCCGTGCCGGCCTGCTGCGTATCTGGCAGGTGATGCAGGACTGCGTCGAGGCCGGCTGCCGCAACGAGGGCATCATGCCCGGCGGACTGAAGGTCAGGCGCCGTGCGGCGGCGCTCCACCGCCAGTTGTGCCAGCGGCCGGAGGCCGGTCTGCGCGACGCCCTCAGCGTGCTCGACTGGGTCAACCTCTAC
SST-10	Pseudomonas aeruginosa SE5419;Pseudomonas aeruginosa SE5416	ATCGTCGAGGACCGCACGCCGCTGGCGTTCCCCTTCAAGACCGCGCGGCAACTGCTCGACCATTGCGTCCGCGAAGGCCTGTCGATCAGCCAGTTGATGGCCGAGAACGAGAAGGCCTGGCGCCCCGCCGAGGAAACCCGTGCCGGCCTGCTGCGTATCTGGCAGGTGATGCAGGATTGCGTCGAGGCCGGCTGCCGCAACGAGGGCATCATGCCCGGCGGTCTGAAGGTCAGGCGCCGTGCGGCGGCGCTCCACCGCCAGTTGTGCCAGCGGCCGGAGGCCGGTCTGCGCGACGCCCTCAGTGTGCTCGACTGGGTCAACCTCTAC
SST-11	Pseudomonas aeruginosa PDNC003;Pseudomonas aeruginosa F23197;Pseudomonas aeruginosa DVT401;Pseudomonas aeruginosa AR19583;Pseudomonas aeruginosa AR19640;Pseudomonas aeruginosa E04;Pseudomonas aeruginosa SE5452;Pseudomonas aeruginosa PABCH09;Pseudomonas aeruginosa paerg012;Pseudomonas aeruginosa paerg011;Pseudomonas aeruginosa paerg010;Pseudomonas aeruginosa paerg003;Pseudomonas aeruginosa paerg00…	ATCGTCGAGGACCGCACGCCGCTGGCGTTCCCCTTCAAGACCGCGCGGCAACTGCTCGACCATTGCGTTCGCGAAGGCCTGTCGATCAGCCAGTTGATGGCCGAGAACGAGAAGGCCTGGCGCCCCGCCGAGGAAACCCGTGCCGGCCTGCTGCGTATCTGGCAGGTGATGCAGGATTGCGTCGAGGCCGGCTGCCGCAACGAGGGCATCATGCCCGGCGGACTGAAGGTCAGGCGCCGTGCGGCGGCGCTCCACCGCCAGTTGTGCCAGCGGCCGGAGGCCGGTCTGCGCGACGCCCTCAGTGTGCTCGACTGGGTCAACCTCTAC
SST-12	Pseudomonas aeruginosa SCAID PHRX1-2019;Pseudomonas aeruginosa SCAID WND1-2019	ATCGTCGAGGACCGCACGCCGCTGGCGTTCCCCTTCAAGACCGCGCGGCAACTGCTCGACCATTGCGCCCGCGAAGGCCTGTCGATCAGCCAGCTGATGGCCGAGAACGAGAAGGCCTGGCGCCCCGCCGAGGAAACCCGCGCCGGCCTGCTGCGTATCTGGCAGGTGATGCAGGATTGCGTCGAGGCCGGCTGCCGCAACGAGGGCATCATGCCCGGCGGGCTGAAGGTCAGGCGCCGCGCGGCGGCGCTCCACCGCCAGTTGTGCCAGCGGCCGGAGGCCGGCCTGCGCGATGCTCTCAGCGTGCTCGACTGGGTCAACCTCTAC
SST-13	Pseudomonas aeruginosa YB01;Pseudomonas aeruginosa LYT4;Pseudomonas aeruginosa BH9	ATCGTCGAGGACCGCACGCCGCTGGCGTTCCCCTTCAAGACCGCGCGGCAACTGCTCGACCATTGCGCCCACGAAGGCCTGTCGATCAGCCAGTTGATGGCCGAGAACGAGAAGGCCTGGCGCCCCGCCGAGGAAACCCGTGCCGGCCTGCTGCGTATCTGGCAGGTGATGCAGGACTGCGTCGAGGCCGGCTGCCGCAACGAGGGCATCATGCCCGGCGGACTGAAGGTCAGGCGCCGTGCGGCGGCGCTCCACCGCCAGTTGTGCCAGCGGCCGGAGGCCGGTCTGCGCGACGCCCTCAGCGTGCTCGACTGGGTCAACCTCTAC
SST-14	Pseudomonas aeruginosa F63912;Pseudomonas aeruginosa RP73;Pseudomonas aeruginosa T52373;Pseudomonas aeruginosa PcyII-29, PcyII-29;Pseudomonas aeruginosa CF39S;Pseudomonas aeruginosa H27930;Pseudomonas aeruginosa PA121617	ATCGTCGAGGACCGCACGCCGCTGGCGTTCCCCTTCAAGACCGCGCGGCAACTGCTCGACCATTGCGTCCGCGAAGGCCTGTCGATCAGCCAGTTGATGGCCGAGAACGAGAAGGCCTGGCGCCCCGCCGAGGAAACCCGTGCCGGCCTGCTGCGTATCTGGCAGGTGATGCAGGACTGCGTCGAGGCCGGCTGCCGCAACGAGGGCATCATGCCCGGCGGGCTGAAGGTCAGGCGCCGTGCGGCGGCGCTCCACCGCCAGTTGTGCCAGCGGCCGGAGGCCGGTCTGCGCGACGCCCTCAGTGTGCTCGACTGGGTCAACCTCTAC
SST-15	Pseudomonas aeruginosa M8A4;Pseudomonas aeruginosa PA790;Pseudomonas aeruginosa PSE6684;Pseudomonas aeruginosa K19PSE24;Pseudomonas aeruginosa ST773;Pseudomonas aeruginosa 60503;Pseudomonas aeruginosa NCTC13715;Pseudomonas aeruginosa BAMC 07-48;Pseudomonas aeruginosa C7447m	ATCGTCGAGGACCGCACGCCGCTGGCGTTCCCCTTCAAGACCGCGCGGCAACTGCTCGACCATTGCGTCCGCGAAGGCCTGTCGATCAGCCAGTTGATGGCCGAGAACGAGAAGGCCTGGCGCCCCGCCGAGGAAACCCGCGCCGGCCTGCTGCGTATCTGGCAGGTGATGCAGGACTGCGTCGAGGCCGGCTGCCGCAACGAGGGCATCATGCCCGGCGGACTGAAGGTCAGGCGCCGCGCGGCGGCGCTCCACCGCCAGTTGTGCCAGCGGCCGGAGGCCGGCCTGCGCGACGCCCTCAGCGTGCTCGACTGGGTCAACCTCTAC
SST-16	Pseudomonas aeruginosa C7-25, C7-25;Pseudomonas aeruginosa 8D;Pseudomonas aeruginosa PA1616;Pseudomonas aeruginosa H11;Pseudomonas aeruginosa E01;Pseudomonas aeruginosa E02;Pseudomonas aeruginosa E03;Pseudomonas aeruginosa R01;Pseudomonas aeruginosa R08;Pseudomonas aeruginosa R09;Pseudomonas aeruginosa R07;Pseudomonas aeruginosa R10;Pseudomonas aeruginosa R03;Pseudomonas aeruginosa R04;Pseudomona…	ATCGTCGAGGACCGCACGCCGCTGGTGTTCCCCTTCAAGACCGCGCGGCAACTGCTCGACCATTGCGTCCGCGAAGGCCTGTCGATCAGCCAGTTGATGGCCGAGAACGAGAAGGCCTGGCGCCCCGCCGAGGAAACCCGCGCCGGCCTGCTGCGTATCTGGCAGGTGATGCAGGATTGCGTCGAGGCCGGCTGCCGCAACGAGGGCATCATGCCCGGCGGACTGAAGGTCAGGCGCCGCGCGGCGGCGCTCCACCGCCAGTTGTGCCAGCGGCCGGAGGCCGGCCTGCGCGATGCTCTCAGCGTGCTCGACTGGGTCAACCTCTAC
SST-17	Pseudomonas aeruginosa Pa12;Pseudomonas aeruginosa CMC-097;Pseudomonas aeruginosa PABCH45;Pseudomonas aeruginosa E90;Pseudomonas aeruginosa W60856	ATCGTCGAGGACCGCACGCCGCTGGCGTTCCCCTTCAAGACCGCGCGGCAACTGCTCGACCATTGCGTCCGCGAAGGCCTGTCGATCAGCCAGCTGATGGCCGAGAACGAGAAGGCCTGGCGCCCCGCCGAGGAAACCCGTGCCGGCCTGCTGCGTATCTGGCAGGTGATGCAGGATTGCGTCGAGGCCGGCTGCCGCAACGAGGGCATCATGCCCGGCGGACTGAAGGTCAGGCGCCGTGCGGCGGCGCTCCACCGCCAGTTGTGCCAGCGGCCGGAGGCCGGTCTGCGCGACGCCCTCAGTGTGCTCGACTGGGTCAACCTCTAC
SST-18	Pseudomonas aeruginosa RD1-3;Pseudomonas aeruginosa NCTC10728;Pseudomonas aeruginosa G-I-1;Pseudomonas aeruginosa PACS2;Pseudomonas aeruginosa H20;Pseudomonas aeruginosa MINF_7A-sc-2280434;Pseudomonas aeruginosa PABL017;Pseudomonas aeruginosa USDA-ARS-USMARC-41639;Pseudomonas aeruginosa PA-VAP-2;Pseudomonas aeruginosa SCV20265	ATCGTCGAGGACCGCACGCCGCTGGCGTTCCCCTTCAAGACCGCGCGGCAACTGCTCGACCATTGCGCCCACGAAGGCCTGTCGATCAGCCAGTTGATGGCCGAGAACGAGAAGGCCTGGCGCCCCGCCGAGGAAACCCGCACCGGCCTGCTGCGTATCTGGCAGGTGATGCAGGACTGCGTCGAGGCCGGCTGCCGCAACGAGGGCATCATGCCCGGCGGACTGAAGGTCAGGCGCCGTGCGGCGGCGCTCCACCGCCAGTTGTGCCAGCGGCCGGAGGCCGGTCTGCGCGACGCCCTCAGCGTGCTCGACTGGGTCAACCTCTAC
SST-19	Pseudomonas aeruginosa JT86;Pseudomonas aeruginosa UNC_PaerCF13;Pseudomonas aeruginosa WTJH12;Pseudomonas aeruginosa F22031;Pseudomonas aeruginosa PA1609;Pseudomonas aeruginosa P16CT;Pseudomonas aeruginosa DVT429;Pseudomonas aeruginosa LV;Pseudomonas aeruginosa DVT425;Pseudomonas aeruginosa W45909;Pseudomonas aeruginosa FA-HZ1;Pseudomonas aeruginosa E167;Pseudomonas aeruginosa E131;Pseudomonas ae…	ATCGTCGAGGACCGCACGCCGCTGGCGTTCCCCTTCAAGACCGCGCGGCAACTGCTCGACCATTGCGTCCGCGAAGGCCTGTCGATCAGCCAGTTGATGGCCGAGAACGAGAAGGCCTGGCGCCCCGCCGAGGAAACCCGTGCCGGCCTGCTGCGTATCTGGCAGGTGATGCAGGATTGCGTCGAGGCCGGCTGCCGCAACGAGGGCATCATGCCCGGCGGACTGAAGGTCAGGCGCCGTGCGGCGGCGCTCCACCGCCAGTTGTGCCAGCGGCCGGAGGCCGGTCTGCGCGACGCCCTCAGTGTGCTCGACTGGGTCAACCTCTAC
SST-20	Pseudomonas aeruginosa 34Pae8;Pseudomonas aeruginosa 34Pae23;Pseudomonas aeruginosa H03;Pseudomonas aeruginosa NDM1_2;Pseudomonas aeruginosa SE5431;Pseudomonas aeruginosa SE5430;Pseudomonas aeruginosa P96131;Pseudomonas aeruginosa F291007;Pseudomonas aeruginosa 1903031130;Pseudomonas aeruginosa SE5429;Pseudomonas aeruginosa SE5352;Pseudomonas aeruginosa PA19-3047;Pseudomonas aeruginosa B-I-1;Pseu…	ATCGTCGAGGACCGCACGCCGCTGGCGTTCCCCTTCAAGACCGCGCGGCAACTGCTCGACCATTGCGTCCGCGAAGGCCTGTCGATCAGCCAGTTGATGGCCGAGAACGAGAAGGCCTGGCGCCCCGCCGAGGAAACCCGCGCCGGCCTGCTGCGTATCTGGCAGGTGATGCAGGATTGCGTCGAGGCCGGCTGCCGCAACGAGGGCATCATGCCCGGCGGACTGAAGGTCAGGCGCCGCGCGGCGGCGCTCCACCGCCAGTTGTGCCAGCGGCCGGAGGCCGGCCTGCGCGACGCCCTCAGCGTGCTCGACTGGGTCAACCTCTAC
SST-21	Pseudomonas aeruginosa H05;Pseudomonas aeruginosa SCAID PLC1-2021;Pseudomonas aeruginosa SCAID TST-2021;Pseudomonas aeruginosa PABCH46;Pseudomonas aeruginosa PS1793;Pseudomonas aeruginosa WPB099;Pseudomonas aeruginosa WPB101;Pseudomonas aeruginosa WPB100;Pseudomonas aeruginosa T2436;Pseudomonas aeruginosa PABL048;Pseudomonas aeruginosa AR_455;Pseudomonas aeruginosa PASGNDM699;Pseudomonas aerugino…	ATCGTCGAGGACCGCACGCCGCTGGCGTTCCCCTTCAAGACCGCGCGGCAACTGCTCGACCATTGCGTCCGCGAAGGCCTGTCGATCAGCCAGTTGATGGCCGAGAACGAGAAGGCCTGGCGCCCCGCCGAGGAAACCCGCGCCGGCCTGCTGCGTATCTGGCAGGTGATGCAGGATTGCGTCGAGGCCGGCTGCCGCAACGAGGGCATCATGCCCGGCGGACTGAAGGTCAGGCGCCGCGCGGCGGCGCTCCACCGCCAGTTGTGCCAGCGGCCGGAGGCCGGCCTGCGCGATGCTCTCAGCGTGCTCGACTGGGTCAACCTCTAC
SST-22	Pseudomonas aeruginosa Pa608;Pseudomonas aeruginosa PA_150577;Pseudomonas aeruginosa M18;Pseudomonas aeruginosa PA96	ATCGTCGAGGACCGCACGCCGCTGGCGTTCCCCTTCAAGACCGCGCGGCAACTGCTCGACCATTGCGCCCACGAAGGCCTGTCGATCAGCCAGTTGATGGCCGAGAACGAGAAGGCCTGGCGCCCCGCCGAGGAAACCCGCACCGGCCTGCTGCGTATCTGGCAGGTGATGCAGGACTGCGTCGAGGCCGGCTGCCGCAACGAGGGCATCATGCCCGGCGGGCTGAAGGTCAGGCGCCGTGCGGCGGCGCTCCACCGCCAGTTGTGCCAGCGGCCGGAGGCCGGCCTGCGCGATGCCCTCAGCGTGCTCGACTGGGTCAACCTCTAC
SST-23	Pseudomonas aeruginosa UNC_PaerCF35;Pseudomonas aeruginosa PAM68;Pseudomonas aeruginosa PAS6;Pseudomonas aeruginosa PAG7;Pseudomonas aeruginosa A17CT;Pseudomonas aeruginosa PA_154197;Pseudomonas aeruginosa SCAID WND3-2019;Pseudomonas aeruginosa Environ_2;Pseudomonas aeruginosa Environ_1	ATCGTCGAGGACCGCACGCCGCTGGCGTTCCCCTTCAAGACCGCGCGGCAACTGCTCGACCATTGCGTCCGCGAAGGCCTGTCGATCAGCCAGTTGATGGCCGAGAACGAGAAGGCCTGGCGCCCCGCCGAGGAAACCCGTGCCGGCCTGCTGCGTATCTGGCAGGTGATGCAGGATTGCGTCGAGGCCGGCTGCCGCAACGAGGGCATCATGCCCGGCGGGCTGAAGGTCAGGCGCCGTGCGGCGGCGCTCCACCGCCAGTTGTGCCAGCGGCCGGAGGCCGGTCTGCGCGACGCCCTCAGTGTGCTCGACTGGGTCAACCTCTAC
SST-24	Pseudomonas aeruginosa TJ2019-017	ATCGTCGAGGACCGCACGCCGCTGGCGTTCCCCTTCAAGACCGCGCGGCAATTGCTCGACCATTGCGCCCGCGAAGGCCTGTCGATCAGCCAGTTGATGGCCGAGAACGAGAAGGCCTGGCGCCCCGCCGAGGAAACCCGCACCGGCCTGCTGCGTATCTGGCAGGTGATGCAGGACTGCGTCGAGGCCGGCTGCCGCAACGAGGGCATCATGCCCGGCGGGCTGAAGGTCAGGCGCCGTGCGGCGGCGCTCCACCGCCAGTTGTGCCAGCGGCCGGAGGCCGGCCTGCGCGATGCCCTCAGCGTGCTCGACTGGGTCAACCTCTAC
SST-25	Pseudomonas aeruginosa SE5443	ATCGTCGAGGACCGCACGCCGCTGGCGTTCCCCTTCAAGACCGCGCGGCAACTGCTCGACCATTGCGTCCGCGAAGGCCTGTCGATCAGCCAGTTGATGGCCGAGAACGAGAAGGCCTGGCGCCCCGCCGAGGAAACCCGTGCCGGCCTGCTGCGTATCTGGCAGGTGATGCAGGACTGCGTCGAGGCCGGCTGCCGCAACGAGGGCATCATGCCCGGCGGGCTGAAGGTCAGGCGCCGTTCGGCGGCGCTCCACCGCCAGTTGTGCCAGCGGCCGGAGGCCGGCCTGCGCGATGCCCTCAGCGTGCTCGACTGGGTCAACCTCTAC
SST-26	Pseudomonas aeruginosa MS14403;Pseudomonas aeruginosa D5;Pseudomonas aeruginosa PB354;Pseudomonas aeruginosa PB353;Pseudomonas aeruginosa UNC_PaerCF17	ATCGTCGAGGACCGCACGCCGCTGGCGTTCCCCTTCAAGACCGCGCGGCAACTGCTCGACCATTGCGCCCGCGAAGGCCTGTCGATCAGCCAGTTGATGGCCGAGAACGAGAAGGCCTGGCGCCCCGCCGAGGAAACCCGCGCCGGCCTGCTGCGTATCTGGCAGGTGATGCAGGATTGCGTCGAGGCCGGCTGCCGCAACGAGGGCATCATGCCCGGCGGGCTGAAGGTCAGGCGCCGTGCGGCGGCGCTCCACCGCCAGTTGTGCCAGCGGCCGGAGGCCGGTCTGCGCGACGCCCTCAGTGTGCTCGACTGGGTCAACCTCTAC
SST-27	Pseudomonas aeruginosa PA_D21;Pseudomonas aeruginosa PA_D5;Pseudomonas aeruginosa PA_D25;Pseudomonas aeruginosa PA_D22;Pseudomonas aeruginosa PA_D16;Pseudomonas aeruginosa PA_D9;Pseudomonas aeruginosa PA_D2;Pseudomonas aeruginosa PA_D1	ATCGTCGAGGACCGCACGCCGCTGGCGTTCCCCTTCAAGACCGCGCGGCAACTGCTCGACCATTGCGTCCGCGAAGGCCTGTCGATCAGCCAGTTGATGGCCGAGAACGAGAAGGCCTGGCGCCCCGCCGAGGAAACCCGCGCCGGCCTGCTGCGTATCTGGCAGGTGATGCAGGATTGCGTCGAGGCCGGCTGCCGCAACGAGGGCATCATGTCCGGCGGACTGAAGGTCAGGCGCCGCGCGGCGGCGCTCCACCGCCAGTTGTGCCAGCGGCCGGAGGCCGGCCTGCGCGATGCTCTCAGCGTGCTCGACTGGGTCAACCTCTAC
SST-28	Pseudomonas aeruginosa 8380	ATCGTCGAGGACCGCACGCCGCTGGCGTTCCCCTTCAAGACCGCGCGGCAACTGCTCGACCATTGCGTCCGCGAAGGCCTGTCGATCAGCCAGTTGATGGCCGAGAACGAGAAGGCCTGGCGCCCCGCCGAGGAAACCCGTGCCGGCCTGCTGCGTATCTGGCAGGTGATGCAGGACTGTGTCGAGGCCGGCTGCCGCAACGAGGGCATCATGCCCGGCGGGCTGAAGGTCAGGCGCCGTGCGGCGGCGCTCCACCGCCAGTTGTGCCAGCGGCCGGAGGCCGGCCTGCGCGATGCCCTCAGCGTGCTCGACTGGGTCAACCTCTAC
SST-29	Pseudomonas aeruginosa ATCC BAA-2114;Pseudomonas aeruginosa VA-134;Pseudomonas aeruginosa NY4605;Pseudomonas aeruginosa INP-43	ATCGTCGAGGACCGCACGCCGCTGGCGTTCCCCTTCAAGACCGCGCGGCAACTGCTCGACCATTGCGTCCGCGAAGGCCTGTCGATCAGCCAGTTGATGGCCGAGAACGAGAAGGCCTGGCGCCCCGCCGAGGAAACCCGTGCCGGCCTGCTGCGTATCTGGCAGGTGATGCAGGACTGCGTCGAGGCCGGCTGCCGCAACGAGGGCATCATGCCCGGCGGGCTGAAGGTCAGGCGCCGTGCGGCGGCGCTCCACCGCCAGTTGTGCCAGCGGCCGGAGGCCGGTCTGCGCGATGCCCTCAGCGTGCTCGACTGGGTCAACCTCTAC
SST-30	Pseudomonas aeruginosa H09	ATCGTCGAGGACCGCACGCCGCTGGCGTTCCCCTTCAAGACCGCGCGGCAACTGCTCGACCATTGCGCCCGCGAAGGCCTGTCGATCAGCCAGTTGATGGCCGAGAACGAGAAGGCCTGGCGCCCCGCCGAGGAAACCCGTGCCGGCCTGCTGCGTATCTGGCAGGTGATGCAGGATTGCGTCGAGGCCGGCTGCCGCAACGAGGGCATCATGCCCGGCGGGCTGAAGGTCAGGCGCCGTGCGGCGGCGCTCCACCGCCAGTTGTGCCAGCGGCCGGAGGCCGGTCTGCGCGACGCCCTCAGCGTGCTCGACTGGGTCAACCTCTAC
SST-31	Pseudomonas aeruginosa LW	ATCGTCGAGGACCGCACGCCGCTGGCGTTCCCCTTCAAGACCGCGCGGCAACTGCTCGACCATTGCGTCCGCGAAGGCCTGTCGATCAGCCAGTTGATGGCCGAGAACGAGAAGGCCTGGCGCCCCGCCGAGGAAACCCGCGCCGGCCTGCTGCGTATCTGGCAGGTGATGCAGGACTGCGTCGAGGCCGGCTGCCGCAACGAGGGCATCATGCCCGGCGGGCTGAAGGTCAGGCGCCGTGCGGCGGCGCTCCACCGCCAGTTGTGCCAGCGGCCGGAGGCCGGTCTGCGCGACGCCCTCAGTGTGCTCGACTGGGTCAACCTCTAC
SST-32	Pseudomonas aeruginosa Pa84	ATCGTCGAGGACCGCACGCCGCTGGCGTTCCCCTTCAAGACCGCGCGGCAACTGCTCGACCATTGCGCCCGCGAAGGCCTGTCGATCAGCCAGTTGATGGCCGAGAACGAGAAGGCCTGGCGCCCCGCCGAGGAAACCCGTGCCGGCCTGCTGCGTATCTGGCAGGTGATGCAGGACTGCGTCGAGGCCGGCTGCCGCAACGAGGGCATCATGCCCGGCGGGCTGAAGGTCAGGCGCCGTGCGGCGGCGCTCCACCGCCAGTTGTGCCAGCGGCCGGAGGCCGGTCTGCGCGACGCCCTCAGTGTGCTCGACTGGGTCAACCTCTAC
SST-33	Pseudomonas aeruginosa PAK;Pseudomonas aeruginosa HOU1;Pseudomonas aeruginosa PAO1;Pseudomonas aeruginosa PAO1-N;Pseudomonas aeruginosa PAO1-L;Pseudomonas aeruginosa PAO1_Mat-X-1;Pseudomonas aeruginosa PAO1_Kat-X-2;Pseudomonas aeruginosa PartH-Paeruginosa-RM8376;Pseudomonas aeruginosa MIN-155;Pseudomonas aeruginosa MPAO1;Pseudomonas aeruginosa A17PBS;Pseudomonas aeruginosa P16PBS;Pseudomonas aeru…	ATCGTCGAGGACCGCACGCCGCTGGCGTTCCCCTTCAAGACCGCGCGGCAACTGCTCGACCATTGCGCCCGCGAAGGCCTGTCGATCAGCCAGTTGATGGCCGAGAACGAGAAGGCCTGGCGCCCCGCCGAGGAAACCCGCACCGGCCTGCTGCGTATCTGGCAGGTGATGCAGGACTGCGTCGAGGCCGGCTGCCGCAACGAGGGCATCATGCCCGGCGGACTGAAGGTCAGGCGCCGTGCGGCGGCGCTCCACCGCCAGTTGTGCCAGCGGCCGGAGGCCGGTCTGCGCGACGCCCTCAGCGTGCTCGACTGGGTCAACCTCTAC
SST-34	Pseudomonas aeruginosa UNC_PaerCF41	ATCGTCGAGGACCGCACGCCGCTGGCGTTCCCCTTCAAGACCGCGCGGCAACTGCTCGACCATTGCGTCCGCGAAGGCCTGTCGATCAGCCAGTTGATGGCCGAGAACGAGAAGGCCTGGCGCCCCGCCGAGGAAACCCGCGCCGGCCTGCTGCGTATCTGGCAGGTGATGCAGGATTGCGTCGAGGCCGGCTGCCGCAACGAGGGCATCATGCCCGGCGGACTGAAGGTCAGGCGCCGCGCGGCGGCGCTCCACCGCCAGTTGTGCCAGCGGCCGGAGGCCGGCCTGCGCGATGCCCTCAGCGTGCTCGACTGGGTCAACCTCTAC
SST-35	Pseudomonas aeruginosa DVT417;Pseudomonas aeruginosa ZPPH14	ATCGTCGAGGACCGCACGCCGCTGGCGTTCCCCTTCAAGACCGCGCGGCAACTGCTCGACCATTGCGCCCGCGAAGGCCTGTCGATCAGCCAGTTGATGGCCGAGAACGAGAAGGCCTGGCGCCCCGCCGAGGAAACCCGCGCCGGCCTGCTGCGTATCTGGCAGGTGATGCAGGATTGCGTCGAGGCCGGCTGCCGCAACGAGGGCATCATGCCCGGCGGACTGAAGGTCAGGCGCCGCGCGGCGGCGCTCCACCGCCAGTTGTGCCAGCGGCCGGAGGCCGGTCTGCGCGACGCCCTCAGCGTGCTCGACTGGGTCAACCTCTAC
SST-36	Pseudomonas aeruginosa PAC6	ATCGTCGAGGACCGCACGCCGCTGGCGTTCCCCTTCAAGACCGCGCGGCAACTGCTCGACCATTGCGTCCGCGAAGGCCTGTCGATCAGCCAGTTGATGGCCGAGAACGAGAAGGCCTGGCGCCCCGCCGAGGAAACCCGCGCCGGCCTGCTGCGTATCTGGCAGGTGATGCAGGACTGCGTCGAGGCCGGCTGCCGCAACGAGGGCATCATGCCCGGCGGACTGAAGGTCAGGCGCCGCGCGGCGGCGCTCCACCGCCAGTTGTGCCAGCGGCCGGAGGCCGGTTTGCGCGACGCCCTCAGTGTGCTCGACTGGGTCAACCTCTAC
SST-37	Pseudomonas aeruginosa SP4371	ATCGTCGAGGACCGCACGCCGCTGGCGTTCCCCTTCAAGACCGCGCGGCAACTGCTCGACCATTGCGTCCGCGAAGGCCTGTCGATCAGCCAGTTGATGGCCGAGAACGAGAAGGCCTGGCGCCCCGCCGAGGAAACCCGCGCCGGCCTGCTGCGTATCTGGCAGGTGATGCAGGATTGCGTCGAGGCCGGCTGCCGCAACGAGGGCATCATGCCCGGCGGACTGAAGGTCAGGCG-CGCGCGGCGGCGCTCCACCGCCAGTTGTGCCAGCGGCCGGAGGCCGGCCTGCGCGACGCCCTCAGCGTGCTCGACTGGGTCAACCTCTAC
SST-38	Pseudomonas aeruginosa B41226	ATCGTCGAGGACCGCACGCCGCTGGCGTTCCCCTTCAAGACCGCGCGGCAACTGCTCGACCATTGCGTCCGCGAAGGCCTGTCGATCAGCCAGTTGATGGCCGAGAACGAGAAGGCCTGGCGCCCCGCCGAGGAAACCCGCGCCGGCCTGCTGCGTATCTGGCAGGTGATGCAGGATTGCGTCGAGGCCGGCTGCCGCAACGAGGGCATCATGCCCGGCGGACTGAAGGTCAGGCGCCG--CGGCGGCGCTCCACCGCCAGTTGTGCCAGCGGCCGGAGGCCGGCCTGCGCGACGCCCTCAGCGTGCTCGACTGGGTCAACCTCTAC
SST-39	Pseudomonas aeruginosa SP4528	ATCGTCGAGGACCGCACGCCGCTGGCGTTCCCCTTCAAGACCGCGCGGCAACTGCTCGACCATTGCGTCCGCGAAGGCCTGTCGATCAGCCAGTTGATGGCCGAGAACGAGAAGGCCTGGCGCCCCGCCGAGGAAACCCGCGCCGGCCTGCTGCGTATCTGGCAGGTGATGCAGGATTGCGTCGAGGCCGGCTGCCGCAACGAGGGCATCATGCCCGGCGGACTGAAGGTCAGGCGCCG--C-GCGGCGCTCCACCGCCAGTTGTGCCAGCGGCCGGAGGCCGGCCTGCGCGACGCCCTCAGCGTGCTCGACTGGGTCAACCTCTAC
SST-40	Pseudomonas aeruginosa JNQH-PA033;Pseudomonas aeruginosa 12939	ATCGTCGAGGACCGCACGCCGCTGGCGTTCCCCTTCAAGACCGCGCGGCAACTGCTCGACCATTGCGTCCGCGAAGGCCTGTCGATCAGCCAGTTGATGGCCGAGAACGAGAAGGCCTGGCGCCCCGCCGAGGAAACCCGCGCCGGCCTGCTGCGTATCTGGCAGGTGATGCAGGACTGCGTCGAGGCCGGCTGCCGCAACGAGGGCATCATGCCCGGCGGGCTGAAGGTCAGGCGCCGCGCGGCGGCGCTCCACCGCCAGTTGTGCCAGCGGCCGGAGGCCGGCCTGCGCGACGCCCTCAGCGTGCTCGACTGGGTCAACCTCTAC
SST-41	Pseudomonas aeruginosa LYSZa7	ATCGTCGAGGATCGCACGCCGCTGGCGTTTCCCTTCAAGACCGCGCGGCAACTGCTCGACCATTGCGTCCGCGAAGGCCTGTCGATCAGCCAGTTGATGGCCGAGAACGAGAAGGCCTGGCGCCCCGCCGAGGAAACCCGCGCCGGCCTGCTGCGTATCTGGCAGGTGATGCAGGACTGCGTCGAGGCCGGCTGCCGCAACGAGGGCATCATGCCCGGCGGGCTGAAGGTCAGGCGCCGTGCGGCGGCGCTCCACCGCCAGTTGTGCCAGCGGCCGGAGGCCGGTCTGCGCGACGCCCTCAGTGTGCTCGACTGGGTCAACCTCTAC
SST-42	Pseudomonas aeruginosa Pb18	ATCGTCGAGGACCGCACGCCGCTGGCGTTCCCCTTCAAGACCGCGCGGCAACTGCTCGACCATTGCGTTCGCGAAGGCCTGTCGATCAGCCAGTTGATGGCCGAGAACGAGAAGGCCTGGCGCCCCGCCGAGGAAACCCGTGCCGGCCTGCTGCGTATCTGGCAGGTGATGCAGGATTGCGTCGAGGCCGGCTGCCGCAACGAGGGCATCATGCCCGGCGGACTGAAGGTCAGGCGCCGTGCGGCGGCGCTCCACCGCCAGTTGTGCCAGCGGCCGGAGGCCGGTCTGCGCGACGCCCTCAGCGTGCTCGACTGGGTCAACCTCTAC
SST-43	Pseudomonas aeruginosa H16	ATCGTCGAGGACCGCACGCCGCTGGCGTTCCCCTTCAAGACCGCGCGGCAACTGCTCGACCATTGCGTCCGCGAAGGCCTGTCGATCAGCCAGTTGATGGCCGAGAACGAGAAGGCCTGGCGCCCCGCCGAGGAAACCCGCGCCGGCCTGCTGCGTATCTGGCAGGTGATGCAGGATTGCGTCGAGGCCGGCTACCGCAACGAGGGCATCATGCCCGGCGGACTGAAGGTCAGGCGCCGCGCGGCGGCGCTCCACCGCCAGTTGTGCCAGCGGCCGGAGGCCGGCCTGCGCGACGCCCTCAGCGTGCTCGACTGGGTCAACCTCTAC
SST-44	Pseudomonas aeruginosa ZS-PA-05;Pseudomonas aeruginosa PABCH10	ATCGTCGAGGACCGCACGCCGCTGGCGTTTCCCTTCAAGACCGCGCGGCAACTGCTCGACCATTGCGCCCGCGAAGGCCTGTCGATCAGCCAGTTGATGGCCGAGAACGAGAAGGCCTGGCGCCCCGCCGAGGAAACCCGCGCCGGCCTGCTGCGTATCTGGCAGGTGATGCAGGATTGCGTCGAGGCCGGCTGCCGCAACGAGGGCATCATGCCCGGCGGACTGAAGGTCAGGCGCCGCGCGGCGGCGCTCCACCGCCAGTTGTGCCAGCGGCCGGAGGCCGGCCTGCGCGATGCTCTCAGCGTGCTCGACTGGGTCAACCTCTAC
SST-45	Pseudomonas aeruginosa TJ2014-049	ATCGTCGAGGACCGCACGCCGCTGGCGTTCCCCTTCAAGACCGCGCGGCAACTGCTCGACCATTGCGTCCGCGAAGGCCTGTCGATCAGCCAGTTGATGGCCGAGAACGAGAAGGCCTGGCGCCCCGCCGAGGAAACCCGCGCCGGCCTGCTGCGTATCTGGCAGGTGATGCAGGACTGCGTCGAGGCCGGCTGCCGCAACGAGGGCATCATGCCCGGCGGACTGAAGGTCAGGCGCCGCGCAGCAGCGCTCCACCGCCAACTGTGCCAGCGGCCGGAGGCCGGCCTGCGCGACGCCCTCAGCGTGCTCGACTGGGTCAACCTCTAC
SST-46	Pseudomonas aeruginosa CMC-115;Pseudomonas aeruginosa N17-1	ATCGTCGAGGACCGCACGCCGCTGGCGTTCCCCTTCAAGACCGCGCGGCAACTGCTCGACCATTGCGCCCGCGAAGGCCTGTCGATCAGCCAGTTGATGGCCGAGAACGAGAAGGCCTGGCGCCCCGCCGAGGAAACCCGCGCCGGCCTGCTGCGTATCTGGCAGGTGATGCAGGACTGCGTCGAGGCCGGCTGCCGCAACGAGGGCATCATGCCCGGCGGGCTGAAGGTCAGGCGCCGTGCGGCGGCGCTCCACCGCCAGTTGTGCCAGCGGCCGGAGGCCGGTCTGCGCGACGCCCTCAGTGTGCTCGACTGGGTCAACCTCTAC
SST-47	Pseudomonas aeruginosa P8W;Pseudomonas aeruginosa P9W	ATCGTCGAGGACCGCACGCCGCTGGCGTTCCCCTTCAAGACCGCGCGGCAACTGCTCGACCATTGCGTCCGCGAAGGCCTGTCGATCAGCCAGTTGATGGCCGAGAACGAGAAGGCCTGGCGCCCCGCCGAGGAAACCCGCACCGGCCTGCTGCGTATCTGGCAGGTGATGCAGGACTGCGTCGAGGCCGGCTGCCGCAACGAGGGCATCATGCCCGGCGGACTGAAGGTCAGGCGCCGTGCAGCGGCGCTCCACCGCCAGTTGTGCCAGCGGCCGGAGGCCGGTCTGCGCGACGCCCTCAGTGTGCTCGACTGGGTCAACCTCTAC
SST-48	Pseudomonas aeruginosa Ps33	ATCGTCGAGGACCGCACGCCGCTGGCGTTCCCCTTCAAGACCGCGCGGCAACTGCTCGACCATTGCGTCCGCGAAGGCCTGTCGATCAGCCAGTTGATGGCCGAGAACGAGAAGGCCTGGCGCCCCGCCGAGGAAACCCGTGCCGGCCTGCTGCGTATCTGGCAGGTGATGCAGGACTGCGTCGAGGCCGGCTGCCGCAACGAGGGCATCATGCCCGGCGGACTGAAGGTCAGGCGCCGTGCGGCGGCGCTCCACCGCCAGTTGTGCCAGCGGCCGGAGGCCGGCCTGCGCGACGCCCTCAGCGTGCTCGACTGGGTCAACCTCTAC
SST-49	Pseudomonas aeruginosa PA-VAP-1	ATCGTCGAGGACCGCACGCCGCTGGCGTTCCCCTTCAAGACCGCGCGGCAACTGCTCGACCATTGCGTCCGCGAAGGCCTGTCGATCAGCCAGTTGATGGCCGAGAACGAGAAGGCCTGGCGCCCCGCCGAGGAAACCCGCGCTGGCCTGCTGCGTATCTGGCAGGTGATGCAGGATTGCGTCGAGGCCGGCTGCCGCAACGAGGGCATCATGCCCGGCGGACTGAAGGTCAGGCGCCGCGCGGCGGCGCTCCACCGCCAGTTGTGCCAGCGGCCGGAGGCCGGCCTGCGCGATGCTCTCAGCGTGCTCGACTGGGTCAACCTCTAC
SST-50	Pseudomonas aeruginosa 6762	ATCGTCGAGGACCGCACGCCGCTGGCGTTCCCCTTCAAGACCGCGCGGCAACTGCTCGACCATTGCGTCCGCGAAGGCCTGTCGATCAGCCAGTTGATGGCCGAGAACGAGAAGGCCTGGCGCCCCGCCGAGGAAACCCGTGCCGGCCTGCTGCGTATCTGGCAGGTGATGCAGGACTGCGTCGAGGCCGGCTGCCGCAACGAGGGCATCATGCCCGGCGGACTGAAGGTCAGGCGCCGTGCGGCGGCGCTCCACCGCCAGTTGTGCCAGCGGCCGGAGGCCGGTCTGCGCGACGCCCTCAGTGTGCTCGACTGGGTCAACCTCTAC
SST-51	Pseudomonas aeruginosa AA43;Pseudomonas aeruginosa AA2;Pseudomonas aeruginosa T2101;Pseudomonas aeruginosa PABL012	ATCGTCGAGGACCGCACGCCGCTGGCGTTCCCCTTCAAGACCGCGCGGCAACTGCTCGACCATTGCGCCCGCGAAGGCCTGTCGATCAGCCAGTTGATGGCCGAGAACGAGAAGGCCTGGCGCCCCGCCGAGGAAACCCGCACCGGCCTGCTGCGTATCTGGCAGGTGATGCAGGACTGCGTCGAGGCCGGCTGCCGCAACGAGGGCATCATGCCCGGCGGACTGAAGGTCAGGCGCCGTGCAGCGGCGCTCCACCGCCAGTTGTGCCAGCGGCCGGAGGCCGGTCTGCGCGACGCCCTCAGTGTGCTCGACTGGGTCAACCTCTAC
SST-52	Pseudomonas aeruginosa YTSY4;Pseudomonas aeruginosa 519119	ATCGTCGAGGACCGCACGCCGCTGGCGTTCCCCTTCAAGACCGCGCGGCAACTGCTCGACCATTGCGCCCGCGAAGGCCTGTCGATCAGCCAGTTGATGGCCGAGAACGAGAAGGCCTGGCGCCCCGCCGAGGAAGCCCGCACCGGCCTGCTGCGTATCTGGCAGGTGATGCAGGACTGCGTCGAGGCCGGCTGCCGCAACGAGGGCATCATGCCCGGCGGGCTGAAGGTCAGGCGCCGTGCGGCGGCGCTCCACCGCCAGTTGTGCCAGCGGCCGGAGGCCGGCCTGCGCGATGCCCTCAGCGTGCTCGACTGGGTCAACCTCTAC
SST-53	Pseudomonas aeruginosa PAO1H2O	ATCGTCGAGGACCGCACGCCGCTGGCGTTCCCCTTCAAGACCGCGCGGCAACTGCTCGACCATTGCGNCCGCGAAGGCCTGTCGATCAGCCAGTTGATGGCCGAGAACGAGAAGGCCTGGCGCCCCGCCGAGGAAACCCGNNCCGGCCTGCTGCGTATCTGGCAGGTGATGCAGGANTGCGTCGAGGCCGGCTGCCGCAACGAGGGCATCATGCCCGGCGGACTGAAGGTCAGGCGCCGTGCGGCGGCGCTCCACCGCCAGTTGTGCCAGCGGCCGGAGGCCGGTCTGCGCGANGCCCTCAGNGTGCTCGACTGGGTCAACCTCTAC
SST-54	Pseudomonas aeruginosa DVT427	ATCGTCGAGGACCGCACGCCGCTGGTGTTCCCCTTCAAGACCGCGCGGCAACTGCTCGACCATTGCGCCCGCGAAGGCCTGTCGATCAGCCAGTTGATGGCCGAGAACGAGAAGGCCTGGCGCCCCGCCGAGGAAACCCGCACCGGCCTGCTGCGTATCTGGCAGGTGATGCAGGACTGCGTCGAGGCCGGCTGCCGCAACGAGGGCATCATGCCCGGCGGGCTGAAGGTCAGGCGCCGTGCGGCGGCGCTCCACCGCCAGTTGTGCCAGCGGCCGGAGGCCGGCCTGCGCGATGCCCTCAGCGTGCTCGACTGGGTCAACCTCTAC

## Sheet: Sheet6.HiSST loci 1vs.2vs.3vs.4
1 locus	2 loci			3 loci				4 loci
pheT	pheT	btuB	pheT + btuB	pheT	btuB	sdaA	pheT + btuB + sdaA	pheT	btuB	sdaA	bvgS	pheT + btuB + sdaA + bvgS		Resume
1	1	1	11	1	1	1	111	1	1	1	1	1111		Cumulative loci	ST cumulative frequency
26	26	52	2652	26	52	40	265240	26	52	40	25	26524025		1	79
8	8	2	82	8	2	9	829	8	2	9	5	8295		2	169
8	8	44	844	8	44	5	8445	8	44	5	5	84455		3	193
41	41	44	4144	41	44	4	41444	41	44	4	10	4144410		4	196
7	7	9	79	7	9	20	7920	7	9	20	14	792014
71	71	53	7153	71	53	5	71535	71	53	5	26	7153526
9	9	53	953	9	53	9	9539	9	53	9	10	953910
3	3	2	32	3	2	3	323	3	2	3	3	3233
5	5	53	553	5	53	52	55352	5	53	52	26	5535226
29	29	27	2927	29	27	15	292715	29	27	15	14	29271514
60	60	44	6044	60	44	50	604450	60	44	50	25	60445025
17	17	14	1714	17	14	28	171428	17	14	28	18	17142818
2	2	16	216	2	16	16	21616	2	16	16	10	2161610
8	8	2	82	8	2	8	828	8	2	8	5	8285
7	7	2	72	7	2	7	727	7	2	7	4	7274
54	54	31	5431	54	31	23	543123	54	31	23	4	5431234
23	23	53	2353	23	53	33	235333	23	53	33	8	2353338
56	56	35	5635	56	35	20	563520	56	35	20	14	56352014
5	5	2	52	5	2	5	525	5	2	5	2	5252
42	42	53	4253	42	53	51	425351	42	53	51	4	4253514
34	34	50	3450	34	50	5	34505	34	50	5	2	345052
16	16	44	1644	16	44	4	16444	16	44	4	22	1644422
27	27	9	279	27	9	20	27920	27	9	20	16	2792016
15	15	43	1543	15	43	6	15436	15	43	6	3	154363
25	25	9	259	25	9	21	25921	25	9	21	14	2592114
37	37	23	3723	37	23	20	372320	37	23	20	14	37232014
20	20	10	2010	20	10	21	201021	20	10	21	14	20102114
35	35	53	3553	35	53	6	35536	35	53	6	33	3553633
51	51	30	5130	51	30	20	513020	51	30	20	14	51302014
10	10	8	108	10	8	11	10811	10	8	11	4	108114
4	4	55	455	4	55	19	45519	4	55	19	2	455192
4	4	2	42	4	2	4	424	4	2	4	2	4242
3	3	14	314	3	14	29	31429	3	14	29	19	3142919
30	30	47	3047	30	47	20	304720	30	47	20	14	30472014
37	37	23	3723	37	23	38	372338	37	23	38	14	37233814
45	45	22	4522	45	22	15	452215	45	22	15	24	45221524
23	23	14	2314	23	14	13	231413	23	14	13	13	23141313
11	11	3	113	11	3	4	1134	11	3	4	7	11347
14	14	4	144	14	4	16	14416	14	4	16	10	1441610
2	2	44	244	2	44	15	24415	2	44	15	31	2441531
26	26	38	2638	26	38	21	263821	26	38	21	17	26382117
4	4	44	444	4	44	14	44414	4	44	14	3	444143
22	22	47	2247	22	47	5	22475	22	47	5	2	224752
70	70	53	7053	70	53	6	70536	70	53	6	10	7053610
28	28	30	2830	28	30	16	283016	28	30	16	21	28301621
31	31	62	3162	31	62	17	316217	31	62	17	2	3162172
59	59	40	5940	59	40	46	594046	59	40	46	20	59404620
9	9	53	953	9	53	19	95319	9	53	19	2	953192
35	35	18	3518	35	18	26	351826	35	18	26	4	3518264
9	9	43	943	9	43	5	9435	9	43	5	2	94352
9	9	35	935	9	35	4	9354	9	35	4	4	93544
12	12	22	1222	12	22	4	12224	12	22	4	10	1222410
16	16	4	164	16	4	11	16411	16	4	11	2	164112
2	2	44	244	2	44	5	2445	2	44	5	22	244522
2	2	30	230	2	30	5	2305	2	30	5	27	230527
7	7	47	747	7	47	21	74721	7	47	21	14	7472114
79	79	62	7962	79	62	4	79624	79	62	4	10	7962410
2	2	26	226	2	26	35	22635	2	26	35	10	2263510
43	43	22	4322	43	22	5	43225	43	22	5	10	4322510
31	31	48	3148	31	48	9	31489	31	48	9	15	3148915
23	23	39	2339	23	39	19	233919	23	39	19	13	23391913
9	9	58	958	9	58	54	95854	9	58	54	35	9585435
3	3	30	330	3	30	19	33019	3	30	19	2	330192
24	24	43	2443	24	43	19	244319	24	43	19	30	24431930
9	9	2	92	9	2	4	924	9	2	4	7	9247
21	21	10	2110	21	10	11	211011	21	10	11	3	2110113
19	19	6	196	19	6	5	1965	19	6	5	11	196511
8	8	53	853	8	53	23	85323	8	53	23	2	853232
60	60	54	6054	60	54	5	60545	60	54	5	5	605455
2	2	2	22	2	2	2	222	2	2	2	2	2222
4	4	19	419	4	19	19	41919	4	19	19	2	419192
8	8	2	82	8	2	11	8211	8	2	11	4	82114
5	5	2	52	5	2	14	5214	5	2	14	9	52149
9	9	46	946	9	46	9	9469	9	46	9	10	946910
67	67	47	6747	67	47	5	67475	67	47	5	10	6747510
25	25	13	2513	25	13	18	251318	25	13	18	8	2513188
39	39	26	3926	39	26	21	392621	39	26	21	2	3926212
33	33	14	3314	33	14	30	331430	33	14	30	20	33143020
41	41	35	4135	41	35	43	413543	41	35	43	24	41354324
40	40	22	4022	40	22	6	40226	40	22	6	2	402262
23	23	47	2347	23	47	5	23475	23	47	5	10	2347510
31	31	14	3114	31	14	18	311418	31	14	18	2	3114182
66	66	47	6647	66	47	21	664721	66	47	21	14	66472114
4	4	60	460	4	60	14	46014	4	60	14	2	460142
51	51	44	5144	51	44	20	514420	51	44	20	14	51442014
32	32	15	3215	32	15	21	321521	32	15	21	2	3215212
52	52	44	5244	52	44	33	524433	52	44	33	2	5244332
68	68	43	6843	68	43	11	684311	68	43	11	2	6843112
47	47	58	4758	47	58	21	475821	47	58	21	2	4758212
60	60	41	6041	60	41	4	60414	60	41	4	18	6041418
4	4	43	443	4	43	5	4435	4	43	5	3	44353
23	23	58	2358	23	58	29	235829	23	58	29	2	2358292
63	63	35	6335	63	35	20	633520	63	35	20	14	63352014
44	44	35	4435	44	35	21	443521	44	35	21	29	44352129
52	52	32	5232	52	32	40	523240	52	32	40	25	52324025
28	28	22	2822	28	22	20	282220	28	22	20	14	28222014
19	19	6	196	19	6	19	19619	19	6	19	13	1961913
30	30	35	3035	30	35	21	303521	30	35	21	14	30352114
29	29	11	2911	29	11	21	291121	29	11	21	14	29112114
48	48	22	4822	48	22	5	48225	48	22	5	10	4822510
41	41	22	4122	41	22	20	412220	41	22	20	24	41222024
2	2	30	230	2	30	19	23019	2	30	19	10	2301910
7	7	20	720	7	20	31	72031	7	20	31	21	7203121
34	34	17	3417	34	17	5	34175	34	17	5	2	341752
53	53	33	5333	53	33	41	533341	53	33	41	25	53334125
23	23	8	238	23	8	22	23822	23	8	22	4	238224
2	2	57	257	2	57	5	2575	2	57	5	7	25757
13	13	2	132	13	2	15	13215	13	2	15	2	132152
26	26	31	2631	26	31	18	263118	26	31	18	15	26311815
43	43	22	4322	43	22	21	432221	43	22	21	10	43222110
7	7	10	710	7	10	26	71026	7	10	26	2	710262
49	49	22	4922	49	22	21	492221	49	22	21	24	49222124
3	3	53	353	3	53	46	35346	3	53	46	7	353467
2	2	7	27	2	7	18	2718	2	7	18	8	27188
5	5	14	514	5	14	5	5145	5	14	5	18	514518
19	19	6	196	19	6	5	1965	19	6	5	12	196512
52	52	44	5244	52	44	4	52444	52	44	4	7	524447
9	9	53	953	9	53	29	95329	9	53	29	2	953292
55	55	31	5531	55	31	19	553119	55	31	19	2	5531192
9	9	49	949	9	49	47	94947	9	49	47	2	949472
69	69	47	6947	69	47	49	694749	69	47	49	14	69474914
55	55	58	5558	55	58	18	555818	55	58	18	10	55581810
62	62	42	6242	62	42	23	624223	62	42	23	14	62422314
28	28	9	289	28	9	27	28927	28	9	27	14	2892714
25	25	45	2545	25	45	7	25457	25	45	7	2	254572
77	77	57	7757	77	57	7	77577	77	57	7	2	775772
15	15	5	155	15	5	17	15517	15	5	17	4	155174
4	4	62	462	4	62	14	46214	4	62	14	4	462144
9	9	24	924	9	24	20	92420	9	24	20	23	9242023
38	38	25	3825	38	25	19	382519	38	25	19	10	38251910
23	23	53	2353	23	53	5	23535	23	53	5	6	235356
22	22	9	229	22	9	20	22920	22	9	20	14	2292014
36	36	21	3621	36	21	32	362132	36	21	32	22	36213222
25	25	62	2562	25	62	22	256222	25	62	22	4	2562224
35	35	34	3534	35	34	4	35344	35	34	4	24	3534424
57	57	36	5736	57	36	44	573644	57	36	44	25	57364425
1	1	10	110	1	10	4	1104	1	10	4	2	11042
42	42	53	4253	42	53	51	425351	42	53	51	3	4253513
23	23	51	2351	23	51	18	235118	23	51	18	4	2351184
44	44	22	4422	44	22	36	442236	44	22	36	25	44223625
8	8	22	822	8	22	23	82223	8	22	23	2	822232
8	8	22	822	8	22	33	82233	8	22	33	2	822332
76	76	56	7656	76	56	53	765653	76	56	53	34	76565334
74	74	53	7453	74	53	11	745311	74	53	11	7	7453117
5	5	30	530	5	30	42	53042	5	30	42	28	5304228
61	61	37	6137	61	37	26	613726	61	37	26	13	61372613
46	46	22	4622	46	22	21	462221	46	22	21	14	46222114
47	47	28	4728	47	28	4	47284	47	28	4	3	472843
10	10	2	102	10	2	11	10211	10	2	11	4	102114
6	6	2	62	6	2	6	626	6	2	6	2	6262
26	26	35	2635	26	35	21	263521	26	35	21	17	26352117
41	41	44	4144	41	44	48	414448	41	44	48	2	4144482
1	1	37	137	1	37	4	1374	1	37	4	2	13742
64	64	43	6443	64	43	5	64435	64	43	5	13	6443513
17	17	5	175	17	5	18	17518	17	5	18	3	175183
5	5	2	52	5	2	14	5214	5	2	14	2	52142
42	42	22	4222	42	22	5	42225	42	22	5	14	4222514
12	12	2	122	12	2	12	12212	12	2	12	2	122122
8	8	44	844	8	44	19	84419	8	44	19	5	844195
23	23	49	2349	23	49	23	234923	23	49	23	32	23492332
9	9	2	92	9	2	10	9210	9	2	10	6	92106
1	1	10	110	1	10	25	11025	1	10	25	2	110252
37	37	23	3723	37	23	37	372337	37	23	37	14	37233714
37	37	23	3723	37	23	39	372339	37	23	39	14	37233914
9	9	30	930	9	30	9	9309	9	30	9	10	930910
5	5	10	510	5	10	21	51021	5	10	21	14	5102114
2	2	29	229	2	29	14	22914	2	29	14	10	2291410
58	58	36	5836	58	36	45	583645	58	36	45	25	58364525
26	26	8	268	26	8	24	26824	26	8	24	15	2682415
8	8	30	830	8	30	5	8305	8	30	5	26	830526
25	25	53	2553	25	53	3	25533	25	53	3	3	255333
2	2	8	28	2	8	19	2819	2	8	19	2	28192
25	25	59	2559	25	59	3	25593	25	59	3	3	255933
25	25	43	2543	25	43	26	254326	25	43	26	15	25432615
2	2	16	216	2	16	3	2163	2	16	3	3	21633
65	65	44	6544	65	44	4	65444	65	44	4	12	6544412
24	24	8	248	24	8	23	24823	24	8	23	2	248232
73	73	53	7353	73	53	5	73535	73	53	5	2	735352
44	44	30	4430	44	30	5	44305	44	30	5	2	443052
3	3	22	322	3	22	34	32234	3	22	34	18	3223418
50	50	30	5030	50	30	5	50305	50	30	5	2	503052
75	75	53	7553	75	53	18	755318	75	53	18	2	7553182
25	25	29	2529	25	29	29	252929	25	29	29	3	2529293
30	30	12	3012	30	12	20	301220	30	12	20	17	30122017
9	9	53	953	9	53	5	9535	9	53	5	3	95353
18	18	5	185	18	5	4	1854	18	5	4	3	18543
78	78	61	7861	78	61	5	78615	78	61	5	5	786155
12	12	2	122	12	2	13	12213	12	2	13	8	122138
31	31	14	3114	31	14	5	31145	31	14	5	3	311453
9	9	62	962	9	62	5	9625	9	62	5	13	962513
77	77	58	7758	77	58	5	77585	77	58	5	10	7758510
72	72	53	7253	72	53	52	725352	72	53	52	2	7253522
15	15	22	1522	15	22	6	15226	15	22	6	3	152263
15	15	63	1563	15	63	6	15636	15	63	6	3	156363
16	16	53	1653	16	53	35	165335	16	53	35	2	1653352
Sum of unique ST = 79	Sum of unique ST = 169			Sum of unique ST = 193				Sum of unique ST = 196
