# Supplementary material for: High-Throughput Short Sequence Typing Schemes for Pseudomonas aeruginosa and Stenotrophomonas maltophilia Pure Culture and Environmental DNA
Source: Microorganisms. 2023 Dec 27;12(1):48. doi: 10.3390/microorganisms12010048 (PMC10819370; doi:10.3390/microorganisms12010048)
Supplement: Supplementary file 1 [file microorganisms-12-00048-s001.zip › TableS2.B_Stenotrophomonas_DataBase HiSST.xlsx]

## Sheet: CONTENT
	DATASET S2: This supplemental file includes 6 sheets: - The first sheet gather the main informations of 39 Stenotrophomonas maltophilia strains retrieved from public genome database and used for the development and validation of the HiSST scheme. - The sheets #2,#3, #4 and #5 are HiSST sequence type databases of respectively yvoA, glnG, tycC and ribA loci, based on the 39 Stenotrophomonas maltoph…

## Sheet: Sheet1. S_maltophilia Strains
HiSST	yvoA	glnG	tycC	ribA	combin_ST	ID	assembly_accession	assembly_name	assembly_status
1	10	9	9	9	10-9-9-9	Stenotrophomonas maltophilia 142	GCF_023702495.1	ASM2370249v1	Complete Genome
2	19	19	18	19	19-19-18-19	Stenotrophomonas maltophilia 2013-SM12	GCF_021117235.1	ASM2111723v1	Complete Genome
2	19	19	18	19	19-19-18-19	Stenotrophomonas maltophilia 2013-SM13	GCF_021117215.1	ASM2111721v1	Complete Genome
3	11	10	10	10	11-10-10-10	Stenotrophomonas maltophilia 2013-SM4	GCF_021117255.1	ASM2111725v1	Complete Genome
4	7	6	7	6	7-6-7-6	Stenotrophomonas maltophilia 291	GCF_006970445.1	ASM697044v1	Chromosome
5	1	1	1	1	1-1-1-1	Stenotrophomonas maltophilia AA1	GCF_002025605.1	ASM202560v1	Complete Genome
6	12	11	11	11	12-11-11-11	Stenotrophomonas maltophilia CSM2	GCF_002847385.1	ASM284738v1	Complete Genome
7	8	7	5	7	8-7-5-7	Stenotrophomonas maltophilia FZD2	GCF_023277525.1	ASM2327752v1	Complete Genome
8	20	20	19	20	20-20-19-20	Stenotrophomonas maltophilia GYH	GCF_023518235.1	ASM2351823v1	Complete Genome
9	13	12	12	12	13-12-12-12	Stenotrophomonas maltophilia ISMMS3	GCF_001274595.1	ASM127459v1	Complete Genome
10	14	13	13	13	14-13-13-13	Stenotrophomonas maltophilia JV3	GCF_000223885.1	ASM22388v1	Complete Genome
11	9	8	8	8	9-8-8-8	Stenotrophomonas maltophilia OUC Est10	GCF_002138415.1	ASM213841v1	Complete Genome
12	17	17	16	17	17-17-16-17	Stenotrophomonas maltophilia PEG-305	GCF_009676545.1	ASM967654v1	Complete Genome
13	15	14	14	14	15-14-14-14	Stenotrophomonas maltophilia SJTH1	GCF_003006435.1	ASM300643v1	Complete Genome
14	5	4	5	4	5-4-5-4	Stenotrophomonas maltophilia SJTL3	GCF_003205835.1	ASM320583v1	Complete Genome
15	16	16	15	16	16-16-15-16	Stenotrophomonas maltophilia SoD9b	GCA_014171555.1	ASM1417155v1	Complete Genome
16	15	15	14	15	15-15-14-15	Stenotrophomonas maltophilia WGB211	GCF_021441865.1	ASM2144186v1	Complete Genome
17	6	5	6	5	6-5-6-5	Stenotrophomonas sp. ESTM1D_MKCIP4_1	GCF_003086895.1	ASM308689v1	Chromosome
18	4	3	4	3	4-3-4-3	Stenotrophomonas sp. SAU14A_NAIMI4_5	GCF_003086795.1	ASM308679v1	Chromosome
19	2	2	2	2	2-2-2-2	Stenotrophomonas sp. ZAC14A_NAIMI4_1	GCF_003086915.1	ASM308691v1	Chromosome
20	3	1	3	1	3-1-3-1	Stenotrophomonas sp. ZAC14D1_NAIMI4_1	GCF_003086775.1	ASM308677v1	Chromosome
20	3	1	3	1	3-1-3-1	Stenotrophomonas sp. ZAC14D1_NAIMI4_6	GCF_003086835.1	ASM308683v1	Chromosome
21	18	18	17	18	18-18-17-18	Stenotrophomonas sp. ZAC14D2_NAIMI4_6	GCF_003086875.1	ASM308687v1	Chromosome
22	21	21	20	21	21-21-20-21	Stenotrophomonas maltophilia AB550	GCF_002189545.2	ASM218954v2	Complete Genome
23	22	22	21	22	22-22-21-22	Stenotrophomonas maltophilia D457	GCF_000284595.1	ASM28459v1	Complete Genome
24	24	23	9	23	24-23-9-23	Stenotrophomonas maltophilia FDAARGOS 325	GCF_002208885.2	ASM220888v2	Complete Genome
25	25	24	23	24	25-24-23-24	Stenotrophomonas maltophilia FDAARGOS 507	GCF_003812985.1	ASM381298v1	Complete Genome
26	23	23	22	23	23-23-22-23	Stenotrophomonas maltophilia FDAARGOS 92	GCF_002951115.1	ASM295111v1	Complete Genome
27	26	25	24	25	26-25-24-25	Stenotrophomonas maltophilia ISMMS2	GCF_001274655.1	ASM127465v1	Complete Genome
27	26	25	24	25	26-25-24-25	Stenotrophomonas maltophilia ISMMS2R	GCF_001274675.1	ASM127467v1	Complete Genome
28	10	23	22	26	10-23-22-26	Stenotrophomonas maltophilia K279a	GCF_000072485.1	ASM7248v1	Complete Genome
29	25	26	25	26	25-26-25-26	Stenotrophomonas maltophilia NCTC10257	GCF_900186865.1	49243_F02	Complete Genome
30	27	27	25	23	27-27-25-23	Stenotrophomonas maltophilia NCTC10258	GCF_900475405.1	44087_C01	Complete Genome
31	28	28	26	27	28-28-26-27	Stenotrophomonas maltophilia NCTC10259	GCF_900636905.1	44982_B01	Complete Genome
32	29	29	22	23	29-29-22-23	Stenotrophomonas maltophilia NCTC10498	GCF_011386925.1	ASM1138692v1	Complete Genome
33	30	30	27	28	30-30-27-28	Stenotrophomonas maltophilia NCTC13014	GCF_900636655.1	43781_D01	Complete Genome
34	31	31	28	29	31-31-28-29	Stenotrophomonas maltophilia R551-3	GCF_000020665.1	ASM2066v1	Complete Genome
35	32	32	29	30	32-32-29-30	Stenotrophomonas maltophilia W18	GCF_003030985.1	ASM303098v1	Complete Genome
36	33	33	30	31	33-33-30-31	Stenotrophomonas maltophilia X28	GCF_006974125.1	ASM697412v1	Complete Genome

## Sheet: Sheet2. yvoA database
SST-yvoA	Strains	Sequences
SST-1	Stenotrophomonas maltophilia AA1;Stenotrophomonas_maltophilia_AA1	TGGCCGAGAGCGGCATGATCGAGCGCCGCCGCCGTGCCGGTTCGTTCGTGGCGCGGCAGCCCCCGCACCTGGAACAGGTGGCGCTGGAGATCCCCGATATCGCCATGGAAGTCGGCTCGCGCGGCCACCAGTACGCCTACCGGCTGCTGCAGCGCGACCTGCGCCTGGCCGAGCCCGGCAATGCCGGCGAGAGGGAGCTGGCCGGCGCTGAGCCGTTGCTGGCGATGCGCTGCCTGCA
SST-2	Stenotrophomonas sp. ZAC14A_NAIMI4_1	TGGCCGAGAGCGGCATGATCGAGCGCCGCCGCCGTGCCGGTTCGTTCGTGGCGCGGCAGCCCCCGCACCTGGAACAGGTGGCGCTGGAGATCCCCGATATCGCCATGGAAGTCGGCTCGCGCGGCCACCAGTACGCCTACCAGCTGCTGCAGCGCGACCTGCGCCTGGCCGAGCCCGGCAATGCCGGCGAGAGGGAGCTGGCCGGCGCTGAGCCGTTGCTGGCGATGCGCTGCCTGCA
SST-3	Stenotrophomonas sp. ZAC14D1_NAIMI4_1;Stenotrophomonas sp. ZAC14D1_NAIMI4_6	TGGCCGAGAGCGGCATGATCGAGCGCCGCCGCCGTGCCGGTTCGTTCGTGGCGCGGCAGCCCCCGCACCTGGAACAGGTGGCGCTGGAGATCCCCGATATCGCCATGGAGGTCGGCTCGCGCGGCCACCAGTACGCCTACCGGCTGCTGCAGCGCGACCTGCGCCTGGCCGAGCCCGGCAATGCCGGCGAGAGGGAGCTGGCCGGCAGTGAGCCGTTGCTGGCGATGCGCTGCCTGCA
SST-4	Stenotrophomonas sp. SAU14A_NAIMI4_5	TGGCCGAGAGCGGCATGATCGAGCGCCGCCGTCGCGCCGGTTCGTTCGTGGCGCGGCAGCCCCCGCACCTGGAACAGGTGGCGCTGGAGATTCCCGACATCGCCATGGAAGTCGGCTCGCGCGGCCATCAGTACGCCTATCGGCTGCTGCAGCGCGAACTGCGCCTGGCCGAGCCGGGCAATGCCGGCGAAGTTGAACTGGCCGGCAGCGAGTCGTTGCTGGCGATGCGCTGCCTGCA
SST-5	Stenotrophomonas maltophilia SJTL3;Stenotrophomonas_maltophilia_SJTL3	TGGCCGAGAGCGGCATGATCGAGCGGCGCCGCCGCGCCGGTTCGTTCGTGGCGCGGCAGCCCCCGCACCTGGAGCAGGTGGCGCTGGAGATTCCCGATATCGCGATGGAGGTCGGCTCGCGCGGCCATCAGTACGCCTATCGTCTGCTGCAGCGCGACCTGCGCCTGGCCGATGCCGGCAATGCCGGCGAAGTGGAGCTGGCCGGCAGCGAAATGCTGCTGGCGATGCGCTGCCTGCA
SST-6	Stenotrophomonas sp. ESTM1D_MKCIP4_1	TGGCAGAGAGCGGCATGATCGAGCGGCGGCGCCGTGCCGGTTCCTTCGTGGCCCGGCAGCCCCCGCACCTGGAACAGGTGGCGCTGGAAATTCCCGATATCGCCATGGAAGTCGGCTCGCGCGGCCATCAGTACGCCTACCGGCTGCTGCAGCGCGAACTGCGCCTGGCCGAGCCCGGCAATGCCGGTGAAGTCGAACTGGCTGGCAGCGAGCCGCTGCTGGCGATGCGTTGCCTGCA
SST-7	Stenotrophomonas maltophilia 291	TGGCCGAGAGCGGCATGATCGAACGCCGCCGTCGCGCCGGTTCATTCGTGGCGCGGCAGCCGCCGCACCTGGAACAGGTGGCGCTGGAGATTCCCGATATCGCGATGGAGGTCGGCTCGCGCGGCCATCAGTACGCCTATCGCCTGCTGCAGCGCGAGCTGCGCCTGGCCGATGCCGGCAATGCCGGCGAAGTGGAGCTGGCCGGCAGCGAAATGCTGCTGGCGATGCGCTGCCTGCA
SST-8	Stenotrophomonas maltophilia FZD2	TGGCCGAGAGCGGCATGATCGAGCGGCGCCGCCGCGCCGGTTCGTTCGTGGCGCGGCAGCCCCCGCACCTGGAGCAGGTGGCGCTGGAGATTCCCGACATCGCGATGGAGGTCGGCTCGCGCGGCCATCAGTACGCCTATCGTCTGCTGCAGCGCGAGCTGCGCCTGGCCGAAGCTGGCAATGCCGGTGAAGTGGAGCTGGCCGGCAGCGAAATGCTGCTGGCGATGCGCTGCCTGCA
SST-9	Stenotrophomonas maltophilia OUC_Est10;Stenotrophomonas_maltophilia_OUC_Est10	TGGCCGAGAGCGGCATGATCGAGCGCCGCCGCCGCGCCGGCTCGTTCGTGGCGCGGCAGCCCCCGCACCTGGAGCAGGTGGCGCTGGAGATTCCCGACATCGCGATGGAAGTCGGCTCACGCGGTCATCAGTACGCGTATCGCCTGCTGCAGCGCGACCTGCGCCTGGCCGACGCCGGCAATGCCGGTGAAGTGGAGCTGGCGGGCCAGGAGACGCTGCTGGCGATGCGTTGCCTGCA
SST-10	Stenotrophomonas maltophilia 142;Stenotrophomonas_maltophilia_K279a	TGGCCGAGAGCGGCATGATCGAGCGTCGCCGCCGTGCCGGTTCGTTCGTGGCGCGGCAACCCCCGCACCTGGAGCAGGTGGCGCTGGAGATTCCCGATATCGCGATGGAGGTTGGCTCGCGCGGCCACCAGTACGCCTATCGCCTGCTGCAGCGCGACCTGCGCCTTGCCGATGCCGGCAATGCCGGTGAAGTCGAGCTGGCCGGGCAGGAAAACCTGCTGGCGATGCGCTGCCTGCA
SST-11	Stenotrophomonas maltophilia 2013-SM4	TGGCCGAGAGCGGCATGATCGAGCGCCGCCGTCGCGCCGGTTCATTCGTGGCGCGGCAGCCGCCGCACCTGGAGCAGGTGGCGCTGGAGATTCCCGATATCGCGATGGAGGTCGGTTCGCGCGGCCATCAGTACGCGTACCGCCTGCTGCAGCGCGAGCTGCGCCTGGCCGACACCGGCAATGCCGGTGAAGTGGAGCTGGCCGGCAGCGAGAAGCTGTTGGCGATGCGCTGCCTGCA
SST-12	Stenotrophomonas maltophilia CSM2;Stenotrophomonas_maltophilia_CSM2	TGGCCGAGAGCGGCATGATCGAGCGCCGCCGTCGCGCCGGCTCGTTCGTGGCGCGGCAGCCCCCGCACCTGGAGCAGGTGGCGCTGGAGATTCCCGATATCGCGATGGAAGTCGGCTCACGCGGTCATCAGTACGCGTATCGCCTGCTGCAGCGCGACCTGCGGCTGGCCGATGCCGGCAATGCTGGCGAAGTCGAGCTGGCCGGCAGCGAAATGCTGCTGGCGATGCGCTGCCTGCA
SST-13	Stenotrophomonas maltophilia ISMMS3;Stenotrophomonas_maltophilia_ISMMS3	TGGCCGAGAGCGGCATGATCGAGCGCCGCCGTCGCGCCGGCTCGTTCGTGGCGCGGCAGCCGCCGCACCTGGAGCAGGTGGCGCTGGAGATCCCCGATATCGCGATGGAGGTCGGCTCGCGCGGCCATCAGTATGGCTACCGCCTGCTGCGACGTGAACTGCGCCTGGCCGACGCCGGCAATGCCGGTGAAGTGGAGCTGGCCGGGCAGCAGAAGCTGCTGGCGATGCGCTGCCTGCA
SST-14	Stenotrophomonas maltophilia JV3;Stenotrophomonas_maltophilia_JV3	TGGCCGAGAGCGGCATGATCGAGCGCCGCCGTCGCGCGGGTTCGTTCGTGGCACGGCAACCCCCGCACCTGGAGCAGGTGGCGCTGGAGATTCCCGACATCGCGATGGAAGTCGGCTCGCGCGGCCATCAGTACGCGTATCGCCTGCTGCAGCGCGACCTGCGGCTGGCCGATGCCGGCAATGCTGGCGAAGTCGAGCTGGCCGGCAGCGAAATGCTGCTGGCGATGCGCTGCCTGCA
SST-15	Stenotrophomonas maltophilia SJTH1;Stenotrophomonas maltophilia WGB211;Stenotrophomonas_maltophilia_SJTH1	TGGCCGAGAGCGGCATGATCGAGCGCCGCCGTCGCGCTGGCTCGTTCGTGGCGCGGCAACCGCCGCACCTGGAGCAGGTGGCGCTGGAGATTCCCGATATCGCGATGGAGGTCGGCTCGCGCGGCCATCAGTACGCGTATCGACTGCTGCAACGCGACCTGCGCCTGGCCGACGCTGGCAATGCCGGTGAAGTGGAGCTGGCGGGCCAGGAGACGCTGCTGGCGATGCGTTGCCTGCA
SST-16	Stenotrophomonas maltophilia SoD9b	TGGCCGAGAGCGGCATGATCGAGCGCCGCCGTCGCGCCGGTTCATTCGTGGCGCGTCAGCCGCCGCACCTGGAGCAGGTGGCGCTGGAGATTCCGGATATCGCGATGGAGGTTGGCTCGCGCGGCCACCAGTACGCCTATCGCCTGCTGCAGCGCGACCTGCGCCTTGCCGATGCCGGCAATGCCGGTGAAGTCGAGCTGGCCGGGCCGGAAAACCTGCTGGCGATGCGCTGCCTGCA
SST-17	Stenotrophomonas maltophilia PEG-305	TGGCCGAGAGCGGCATGATCGAGCGCCGTCGTCGTGCGGGTTCCTTCGTGGCGCGTCAGCCCCCGCACCTGGAACAGGTGGCGCTGGAGATTCCCGACATTGCGATGGAGGTCGGGTCGCGCGGCCATCAGTACGCCTATCGCCTGTTGCAACGGGAACTGCGCCTGGCCGATCCCGGCAATGCCGGCGAGGTAGAGCTGGCGGGCCGCGAGAAACTGCTGGCGATGCGCTGCCTGCA
SST-18	Stenotrophomonas sp. ZAC14D2_NAIMI4_6	TGGCCGAGAGCGGCATGATCGAGCGCCGGCGCCGCGCCGGTTCGTTCGTGGCCCGGCAGCCGCCGCACCTGGAACAGGTGGCGCTGGAAATTCCCGATATCGCGATGGAAGTCGGCTCGCGCGGCCATCAATACAGCTACCGCCTGCTGCAGCGTGAACTGCGCGGGGCCAGCGCGGGTAATGCCGGCGAAGAAGAGCTGGCCGGTGCGGGCTCGCTGTTGGCGATGCGCTGCCTGCA
SST-19	Stenotrophomonas maltophilia 2013-SM13;Stenotrophomonas maltophilia 2013-SM12	TGGCCGAGAGCGGCATGATCGAGCGCCGCCGTCGTGCGGGTTCCTTCGTGGCGCGTCAGCCCCCGCACCTGGAACAGGTGGCGCTGGAGATTCCCGACATTGCGATGGAGGTCGGTTCGCGCGGCCATCAGTACGCCTATCGCCTGCTGCAACGGGAACTGCGCTTGGCTGATCCCGGCAATGCCGGCGAGGTAGAGCTGGCGGGCCGCGAGAAACTGCTGGCGATGCGCTGCCTGCA
SST-20	Stenotrophomonas maltophilia GYH	TGGCCGAGAGCGGCATGATCGAGCGCCGCCGCCGTGCAGGCTCGTTCGTGGCGCGGCAGCCGCCGCATCTGGAGCAGGTGGCGCTGGAAATTCCGGATATCGCGATGGAGGTTGGCTCGCGTGGCCATCAGTACGGCTACCGCCTGCTGCAGCGCGAGTTGCGTCTGGCTGACGTGGGCAATGCCGGCGAAGTGGAGTTGGCTGGTAGCGAAATGCTGCTGGCGATGCGTTGCCTGCA
SST-21	Stenotrophomonas_maltophilia_AB550	TGGCCGAGAGCGGCATGATCGAGCGCCGCCGTCGCGCGGGTTCGTTCGTGGCGCGTCAGCCACCGCACCTGGAGCAGGTGGCGCTGGAGATTCCCGATATCGCGATGGAAGTCGGCTCGCGGGGACATCAGTACGCCTATCGACTGCTGCAGCGCGATCTGCGCCTGGCCGATGCCGGCAATGCCGGCGAAGTCGAGCTGGCCGGCAGCGAAATGCTGCTGGCGATGCGCTGCCTGCA
SST-22	Stenotrophomonas_maltophilia_D457	TGGCCGAGAGCGGCATGATCGAGCGCCGCCGTCGCGCGGGTTCGTTCGTGGCGCGTCAGCCACCGCACCTGGAGCAGGTGGCGCTGGAGATTCCCGACATTGCGATGGAAGTCGGCTCGCGGGGACATCAGTACGCCTATCGATTGCTGCAGCGCGACCTGCGCCTGGCCGATGCCGGCAATGCCGGCGAAGTCGAGCTGGCCGGCAGCGAAATGCTGCTGGCGATGCGCTGCCTGCA
SST-23	Stenotrophomonas_maltophilia_FDAARGOS_92	TGGCCGAGAGCGGCATGATCGAGCGTCGCCGCCGTGCCGGTTCGTTCGTGGCGCGGCAGCCCCCGCACCTGGAGCAGGTGGCGCTGGAGATTCCCGATATCGCGATGGAGGTTGGCTCGCGCGGCCACCAGTACGCCTATCGCCTGCTGCAGCGCGACCTGCGCCTTGCCGATGCCGGCAATGCCGGTGAAGTCGAGCTGGCCGGGCAGGAAAACCTGCTGGCGATGCGCTGCCTGCA
SST-24	Stenotrophomonas_maltophilia_FDAARGOS_325	TGGCCGAGAGCGGCATGATCGAGCGTCGCCGCCGTGCCGGTTCGTTCGTGGCGCGGCAACCCCCGCACCTGGAGCAGGTGGCGCTGGAGATCCCCGATATCGCGATGGAGGTTGGCTCGCGCGGCCACCAGTACGCCTATCGCCTGCTGCAGCGCGACCTGCGCCTTGCCGATGCCGGCAATGCCGGTGAAGTCGAGCTGGCCGGTCAGGAAAACCTGCTGGCGATGCGCTGCCTGCA
SST-25	Stenotrophomonas_maltophilia_FDAARGOS_507;Stenotrophomonas_maltophilia_NCTC10257	TGGCCGAGAGCGGCATGATCGAGCGTCGCCGCCGTGCCGGTTCGTTCGTGGCGCGGCAACCCCCGCACCTGGAGCAGGTGGCGCTGGAGATCCCCGATATCGCGATGGAGGTTGGCTCGCGCGGCCACCAGTACACCTATCGCCTGCTGCAGCGCGACCTGCGCCTTGCCGATGCCGGCAATGCCGGTGAAGTCGAGCTGGCCGGACAGGAAAACCTGCTGGCGATGCGCTGCCTGCA
SST-26	Stenotrophomonas_maltophilia_ISMMS2;Stenotrophomonas_maltophilia_ISMMS2R	TGGCCGAGAGCGGCATGATCGAACGTCGCCGTCGTGCGGGTTCGTTCGTGGCGCGACAGCCGCCACACCTGGAGCAGGTGGCGCTGGAAATTCCGGACATTGCGATGGAGGTCGGTTCGCGCGGGCATCAGTACGGCTACACGCTGTTGCAGCGCGAGCTGCGCCTGGCTGAAGTGGGCAATGCCGGCGAAGTGGAACTGGCCGGCAGCGAAATGCTGTTGGCGATGCGTTGCCTGCA
SST-27	Stenotrophomonas_maltophilia_NCTC10258	TGGCCGAGAGCGGCATGATCGAGCGTCGCCGCCGTGCCGGTTCGTTCGTCGCGCGGCAGCCCCCGCACCTGGAGCAGGTGGCGCTGGAGATTCCCGATATCGCGATGGAGGTTGGCTCGCGCGGCCACCAGTACGCCTATCGCCTGCTGCAGCGCGACCTGCGCCTTGCCGATGCCGGCAATGCCGGTGAAGTCGAGCTGGCCGGACAGGAAAACCTGCTGGCGATGCGCTGCCTGCA
SST-28	Stenotrophomonas_maltophilia_NCTC10259	TGGCCGAGAGCGGCATGATCGAGCGCCGCCGTCGCGCCGGTTCGTTCGTGGCGCGTCAGCCACCGCACCTGGAGCAGGTGGCGCTGGAGATTCCCGATATCGCGATGGAAGTCGGCTCGCGGGAACATCAGTACGCCTATCGACTGCTGCAGCGCGACCTGCGCCTGGCCGATGCCGGCAATGCCGGCGAAGTCGAGCTGGCCGGCAGCGAAATGCTGCTGGCGATGCGCTGCCTGCA
SST-29	Stenotrophomonas_maltophilia_NCTC10498	TGGCCGAGAGCGGCATGATCGAACGCCGTCGCCGTGCCGGTTCGTTCGTGGCGCGGCAGCCCCCGCACCTGGAGCAGGTGGCGCTGGAGATTCCCGATATCGCGATGGAGGTTGGCTCGCGCGGCCACCAGTACGCCTATCGCCTGCTGCAGCGCGACCTGCGCCTTGCCGATGCCGGCAATGCCGGTGAAGTCGAGCTGGCCGGGCAGGAAAACCTGCTGGCGATGCGCTGCCTGCA
SST-30	Stenotrophomonas_maltophilia_NCTC13014	TGGCCGAGAGCGGCATGATCGAGCGTCGCCGCCGCGCGGGTTCGTTCGTGGCGCGGCAGCCGCCGCACCTGGAGCAGGTGGCGCTGGAGATTCCCGATATCGCGATGGAGGTCGGCTCGCGCGGCCATCAGTACGCCTATCGTCTGCTGCAGCGCGAGCTGCGCCTTGCCGACGCTGGCAATGCCGGTGAAGTGGAGCTGGCCGGCCAGGAGACGCTGCTGGCGATGCGTTGCCTGCA
SST-31	Stenotrophomonas_maltophilia_R551-3	TGGCCGAGAGCGGCATGATCGAGCGCCGCCGCCGCGCCGGTTCGTTCGTGGCGCGGCAGCCGCCGCACCTGGAGCAGGTGGCGCTTGAGATTCCGGATATCGCGATGGAAGTCGGTTCGCGTGGCCACCAGTACGGCTACCACCTGCTGCAGCGCGAGCTGCGCCTGGCCGATGCCGGCAATGTTGGCGAAGTGGAGCTGGCCGGCAGCGAACAGCTGCTGGCGATGCGCTGCCTGCA
SST-32	Stenotrophomonas_maltophilia_W18	TGGCCGAGAGCGGCATGATCGAGCGTCGCCGCCGCGCAGGTTCGTTCGTGGCGCGGCAGCCGCCGCACCTGGAGCAGGTGGCGCTGGAGATTCCCGATATCGCGATGGAGGTCGGCTCGCGCGGCCATCAGTACGCCTATCGTCTGCTGCAGCGCGAGCTGCGCCTTGCCGATGCCGGCAATGCCGGCGAAGTCGAGCTGGCCGGCCAGGAAAACCTGCTGGCGATGCGCTGCCTGCA
SST-33	Stenotrophomonas_maltophilia_X28	TGGCCGAGAGCGGCATGATCGAACGCCGCCGTCGCGCCGGTTCCTTCGTGGCGCGGCAGCCGCCGCACCTGGAGCAGGTGGCGCTGGAGATTCCGGATATCGCGATGGAGGTCGGTTCACGCGGCCATCAGTACGCCTATCGCCTGCTGCAGCGCGAGCTGCGGCTGGCCGATGCCGGCAATGCTGGCGAAGTCGAGCTGGCCGGGCAGGAGAACCTGCTGGCGATGCGCTGCCTGCA

## Sheet: Sheet3. glnG database
SST-glnG	Strains	Sequences
SST-1	Stenotrophomonas maltophilia AA1;Stenotrophomonas sp. ZAC14D1_NAIMI4_1;Stenotrophomonas sp. ZAC14D1_NAIMI4_6;Stenotrophomonas_maltophilia_AA1	GGTGGTGGTGATGTCGGCCTACACCGATGTGGCCAGCACGGCCGGCGCGTTCCGCGGCGGCGCCCACGAATTCCTGTCCAAGCCCTTCGATCTGGATGATGCCGTCGCGCTGGCCCAGCGCGTGCTGCCTGCCGTGGCACCGGCACTGGCCGCGCCCACGCCGGTGGCCGATGCGCCCAGCGACCAGCCACCGCAGCTGGTAGGCGATACGCCGCCGATGCGCGCGCTGTTCCGTGCCATCGGTCGTTTGGCGCAGGCGCCGCTGGCCGTGCTCATCACTGGCGAAACCGGCACCGGCAAGGAGCTGGTGGC
SST-2	Stenotrophomonas sp. ZAC14A_NAIMI4_1	GGTGGTGGTGATGTCGGCCTACACCGATGTGGCCAGCACGGCCGGCGCGTTCCGCGGCGGCGCCCACGAATTCCTGTCCAAGCCCTTCGATCTGGATGATGCGGTGGCCCTGGCCCAGCGCGTGCTGCCTGCCGTGGCACCGGCACTGGCCGCGCCCACGCCGGTGGCCGATGCGCCCAGCGACCAGCCGCCGCAGCTGGTGGGCGATACGCCGCCGATGCGCGCGCTGTTCCGTGCCATCGGCCGCCTGGCGCAGGCGCCGCTGGCCGTGCTCATCACCGGCGAAACCGGCACCGGCAAGGAACTGGTGGC
SST-3	Stenotrophomonas sp. SAU14A_NAIMI4_5	GGTGGTGGTGATGTCGGCCTACACCGATGTGGCCAGCACGGCGGGCGCGTTCCGCGGTGGCGCACACGAGTTCCTGTCCAAGCCCTTTGACCTCGACGATGCAGTCGCGCTGGCCCAGCGCGTGCTGCCCGCCGTGGCACCAGCACTGGCCGCGCCCGCCCCGGTGGCCGAAACGCCCAGCGACCAGCCGCCACAGCTGGTGGGCGACACGCCACCGATGCGCGCGCTGTTCCGCGCCATCGGCCGGCTGGCGCAGGCACCGCTGGCGGTGCTCATCACCGGCGAAACCGGCACCGGCAAGGAACTGGTGGC
SST-4	Stenotrophomonas maltophilia SJTL3;Stenotrophomonas_maltophilia_SJTL3	GGTGGTGGTGATGTCGGCCTACACCGATGTGGCCAGCACGGCCGGTGCGTTCCGCGGCGGCGCGCATGAATTCCTGTCCAAGCCGTTCGACCTGGACGATGCCGTGGCGCTGGCCCAGCGTGTGCTGCCGGCAGTTGCACCGGCACTGGCGGCGCCCACACCTACGGCCGAAGCGCATAGCGACCAGCCGCCGCAACTGGTGGGCGATACCCCGCCGATGCGCGCGCTGTTCCGTGCCATCGGCCGCCTGGCGCAGGCGCCGCTGGCGGTGCTGATCACCGGCGAGACCGGCACCGGCAAGGAACTGGTGGC
SST-5	Stenotrophomonas sp. ESTM1D_MKCIP4_1	GGTGGTGGTGATGTCGGCCTACACCGATGTGGCCAGCACGGCCGGCGCGTTCCGCGGTGGCGCGCATGAATTCCTGTCCAAGCCCTTCGACCTGGACGATGCCGTGGCCCTGGCCCAGCGTGTGCTGCCTGCCGTGGCTCCCGCGCTGGCTGCGCCCACGGTAGTGGCCGAGGCACCCAGCGACCAGCCGCCCCAGCTGGTGGGCGATACGCCGCCGATGCGCGCGCTGTTCCGGGCCATCGGCCGCTTGGCGCAGGCACCGCTGGCGGTGCTCATCACCGGCGAAACCGGCACCGGCAAGGAACTGGTGGC
SST-6	Stenotrophomonas maltophilia 291	GGTGGTGGTGATGTCGGCCTATACCGATGTCGCCAGTACTGCCGGTGCGTTCCGCGGTGGCGCGCATGAATTCCTGTCCAAACCGTTCGACCTGGACGATGCCGTGGCGCTGGCGCAGCGTGTGCTGCCGGCGGTGGCGCCCGCGCTGGCCGCTCCCAGCCCCGCCGCCGAAACGTCCAGCGACCAGCCGCCGCAACTGGTGGGTGATACGCCGCCGATGCGCGCGCTGTTCCGCGCCATCGGTCGCCTGGCGCAGGCGCCGCTGGCGGTGCTGATCACCGGCGAGACCGGCACCGGCAAGGAACTGGTGGC
SST-7	Stenotrophomonas maltophilia FZD2	GGTGGTGGTGATGTCGGCCTACACCGATGTGGCCAGTACGGCCGGTGCGTTCCGCGGTGGCGCGCATGAATTCCTGTCCAAACCGTTCGACCTGGACGACGCGGTGGCGCTGGCGCAGCGTGTGCTGCCGGCGGTGGCGCCGGCATTGGCTGCCCCCAGCCCCGCAGCTGAAACTCCCAGCGACCAGCCGCCGCAACTGGTGGGCGATACCCCGCCGATGCGCGCGCTGTTCCGTGCCATCGGCCGCCTGGCGCAGGCGCCGTTGGCGGTGCTGATCACCGGCGAGACCGGCACCGGCAAGGAACTGGTGGC
SST-8	Stenotrophomonas maltophilia OUC_Est10;Stenotrophomonas_maltophilia_OUC_Est10	GGTGGTGGTGATGTCGGCCTATACCGACGTGGCCAGCACCGCGGGCGCGTTCCGTGGTGGCGCGCATGAATTCCTGTCCAAACCGTTCGACCTGGACGACGCGGTGGCGCTGGCGCAGCGTGTGCTGCCGGCGATTGCGCCGGCACTGGCGGCGCCCACACCTGCGGCGGAAGCGCCCAGCGACCAACCGCCGCAACTGGTGGGCGATACCCCGCCGATGCGCGCGCTGTTCCGTGCCATCGGCCGCCTGGCGCAGGCGCCGCTGGCGGTGCTGATCACCGGCGAGACCGGCACCGGCAAGGAACTGGTGGC
SST-9	Stenotrophomonas maltophilia 142	GGTGGTCGTGATGTCGGCCTATACCGATGTGGCCAGCACGGCCGGTGCGTTCCGTGGTGGCGCGCATGAATTCCTGTCCAAACCGTTCGACCTGGACGACGCGGTGGCGCTGGCACAGCGTGTGCTGCCGGCAATTGCGCCGGCACTGGCGGCGCCCACACCTGCGGCGGAAGCGCATAGCGACCAACCGCCGCAACTGGTGGGCGATACCCCGCCGATGCGCGCGCTGTTCCGTGCCATCGGCCGCCTGGCGCAGGCGCCGCTGGCGGTGCTGATCACCGGCGAGACCGGCACCGGCAAGGAGCTGGTGGC
SST-10	Stenotrophomonas maltophilia 2013-SM4	GGTGGTCGTGATGTCGGCCTATACCGATGTGGCCAGCACGGCCGGTGCGTTCCGCGGCGGCGCGCATGAATTCCTGTCCAAGCCGTTCGACCTGGACGATGCGGTGGCATTGGCGCAGCGGGTACTGCCGGCGGTGGCGCCCGCGCTGGCCGCTCCCAGCCCCGCCACCGAAGCGCCCAGCGACCAGCCGCCGCAACTGGTGGGTGATACGCCGCCGATGCGCGCGCTGTTCCGCGCCATTGGACGCCTGGCGCAGGCACCGCTGGCGGTGCTGATCACCGGCGAGACCGGCACCGGCAAGGAGCTGGTGGC
SST-11	Stenotrophomonas maltophilia CSM2;Stenotrophomonas_maltophilia_CSM2	GGTGGTGGTGATGTCGGCCTATACCGACGTGGCCAGCACCGCGGGCGCGTTCCGCGGTGGCGCGCATGAATTCCTGTCCAAACCGTTCGACCTGGACGATGCCGTGGCGCTGGCGCAGCGTGTGCTGCCGGCAGTTGCGCCGGCATTGGCGGCGCCCACGCCTGCGGCGGAAGCGCATAGCGACCTGCCGCCGCAACTGGTGGGTGATACGCCGCCGATGCGCGCGCTGTTCCGCGCCATCGGTCGCCTGGCGCAGGCGCCGCTGGCGGTGCTGATCACCGGCGAGACCGGCACCGGCAAGGAACTGGTGGC
SST-12	Stenotrophomonas maltophilia ISMMS3;Stenotrophomonas_maltophilia_ISMMS3	GGTGGTGGTGATGTCGGCCTACACCGATGTGGCCAGCACCGCCGGCGCGTTCCGCGGCGGCGCGCATGAGTTCCTGTCCAAGCCATTCGACCTGGACGATGCGGTGGCGCTGGCGCAGCGCGTGCTGCCGGCGGTGGCACCGGCCATGGCAACGCCCACGCCCGCCGCCGAAACCCCGAGCGACCAGCCACCGCAACTGGTGGGCGATACCCCGCCGATGCGCGCGCTGTTCCGTGCCATCGGTCGCCTGGCACAGGCGCCGCTGGCGGTGCTGATCACCGGCGAGACCGGCACCGGCAAGGAGCTGGTGGC
SST-13	Stenotrophomonas maltophilia JV3;Stenotrophomonas_maltophilia_JV3	GGTGGTGGTGATGTCGGCCTACACCGATGTGGCCAGCACCGCGGGCGCGTTCCGCGGTGGCGCGCATGAATTCCTGTCCAAACCGTTCGACCTGGACGATGCCGTGGCGCTGGCGCAGCGTGTGCTGCCGGCGGTGGCGCCCGCGCTGGCCGCTCCCGGCCCCGCCGCTGAAACGTCCGGCGACCATCCGCCGCAACTGGTGGGCGATACCCCGCCGATGCGCGCGCTGTTCCGTGCCATCGGCCGCCTGGCACAAGCGCCGCTGGCGGTGCTGATCACCGGCGAGACCGGCACCGGCAAGGAGCTGGTGGC
SST-14	Stenotrophomonas maltophilia SJTH1;Stenotrophomonas_maltophilia_SJTH1	GGTGGTGGTGATGTCGGCCTACACCGATGTGGCCAGCACGGCCGGTGCGTTCCGCGGTGGCGCGCATGAATTCCTGTCCAAGCCGTTCGATCTGGACGACGCGGTGGCGCTGGCGCAGCGTGTGCTGCCGGCCGTTGCACCGGCACTGGCGGCGCCCACACCTGCGGCGGAAGCGCATAGCGACCAACCACCACAGCTGGTGGGCGACACCCCGCCGATGCGCGCGCTGTTCCGTGCCATCGGCCGCCTGGCACAAGCGCCGCTGGCGGTGCTGATCACCGGCGAGACCGGCACCGGCAAGGAGCTGGTGGC
SST-15	Stenotrophomonas maltophilia WGB211	GGTGGTGGTGATGTCGGCCTACACCGATGTGGCCAGTACGGCCGGTGCGTTCCGCGGTGGCGCGCATGAATTCCTGTCCAAGCCGTTCGATCTGGACGACGCGGTGGCGCTGGCGCAGCGTGTGCTGCCGGCCGTTGCACCGGCACTGGCGGCGCCCACACCTGCGGCGGAAGCGCATAGCGACCAACCACCGCAGCTGGTGGGCGATACCCCGCCGATGCGCGCGCTGTTCCGTGCCATCGGTCGCCTGGCGCAGGCGCCGCTGGCGGTGCTGATCACCGGCGAAACCGGCACCGGCAAGGAGCTGGTGGC
SST-16	Stenotrophomonas maltophilia SoD9b	GGTGGTGGTGATGTCGGCCTACACGGATGTCGCCAGCACGGCCGGCGCGTTCCGCGGCGGCGCGCATGAATTCCTGTCCAAGCCGTTCGACCTGGACGATGCGGTGGCGTTGGCGCAACGCGTGCTGCCGGCGGTTGCACCGGCCATGGCAGCGCCCACCCCTGCGCTCGAAACCGGCAGCGACCAGCCGCCGCAGCTGGTCGGTGATACACCGCCGATGCGCGCGCTGTTCCGCGCCATTGGTCGCCTGGCGCAGGCACCGCTGGCGGTGCTGATCACCGGCGAGACCGGCACCGGCAAGGAGCTGGTGGC
SST-17	Stenotrophomonas maltophilia PEG-305	GGTGGTGGTGATGTCGGCCTACACCGATGTGGCCAGCACCGCCGGTGCGTTCCGCGGCGGCGCGCATGAGTTCCTGTCCAAGCCGTTCGATCTGGACGATGCGGTGGCACTGGCGCAGCGGGTGCTGCCGGCCGTGGCACCCGCTCTGGCCGCGCCCGGCCTGGCAGTCGAAACCGCCAGCGACCAGCCGCCGCAACTGGTGGGCGATACCCCGGCGATGCGCGCGCTGTTCCGTGCCATTGGTCGCCTGGCGCAGGCGCCGCTGGCGGTGCTGATCACCGGCGAGACCGGCACCGGCAAGGAACTGGTGGC
SST-18	Stenotrophomonas sp. ZAC14D2_NAIMI4_6	GGTGGTGGTGATGTCGGCCTACACCGATGTGGCCAGCACGGCCGGTGCGTTCCGCGGCGGCGCCCACGAATTCCTGTCCAAGCCCTTCGATCTGGACGATGCGGTGGCGCTGGCCCAGCGCGTGCTGCCGGCGGTGGCCCCGGCCCTGGCCGCGCCAACCCCGGTGAACGAAGCGCCCAGCGACCAGCCGCCGCAGCTGGTGGGAGACACCCCGCCCATGCGCGCGCTGTTCCGTGCCATCGGCCGCCTGGCGCAGGCGCCGCTGGCGGTGCTGATCACCGGCGAAACCGGCACCGGCAAGGAACTGGTGGC
SST-19	Stenotrophomonas maltophilia 2013-SM13;Stenotrophomonas maltophilia 2013-SM12	GGTGGTGGTGATGTCGGCCTACACCGATGTGGCCAGCACCGCCGGTGCGTTCCGCGGCGGCGCGCATGAGTTCCTGTCCAAGCCGTTCGATCTGGACGATGCGGTGGCACTGGCGCAGCGGGTGCTGCCGGCGGTGGCACCCACCCTGGCCGCGCCCAGCCCGGCAGTCGAAACCGCCAGCGACCAGCCGCCGCAACTGGTGGGCGATACACCGGCGATGCGCGCGCTGTTCCGTGCCATTGGTCGCCTGGCGCAGGCGCCGCTGGCGGTGCTGATCACCGGCGAGACCGGCACCGGCAAGGAACTGGTGGC
SST-20	Stenotrophomonas maltophilia GYH	GGTGGTGGTGATGTCGGCCTATACCGATGTGGCCAGCACCGCCGGTGCGTTCCGTGGGGGCGCGCATGAATTCCTGTCCAAACCGTTCGATCTGGACGATGCGGTGGCGCTGGCGCAGCGCGTGCTGCCAGCAGTGGCACCGGCACTGGCCGCGCCCACGCCCGCTGCGGAAGCGCACAGCGACCAGCCGCCGCAGCTGGTTGGCGATACGCCGCCGATGCGCGCGCTGTTCCGCGCCATCGGTCGCCTGGCACAGGCGCCGCTGGCGGTGCTGATCACCGGCGAGACCGGCACCGGCAAGGAGCTGGTGGC
SST-21	Stenotrophomonas_maltophilia_AB550	GGTGGTGGTGATGTCGGCCTATACCGATGTCGCCAGCACCGCCGGTGCGTTCCGCGGGGGCGCGCATGAATTCCTGTCCAAGCCGTTCGACCTGGACGATGCCGTGGCGCTGGCGCAACGTGTGCTGCCGGCCGTGGCGCCCGCGCTGGCCACCCCCAGCCCCGCCGCCGAAACGCCCGGCGACCAGCCGCCGCAATTGGTGGGCGATACGCCGCCGATGCGTGCGCTGTTCCGCGCCATCGGTCGCCTGGCGCAGGCACCGCTGGCGGTGCTGATCACCGGCGAGACCGGCACCGGCAAGGAGCTGGTGGC
SST-22	Stenotrophomonas_maltophilia_D457	GGTGGTGGTGATGTCGGCCTATACCGATGTCGCCAGCACCGCCGGTGCGTTCCGCGGGGGCGCGCATGAATTCCTGTCCAAGCCGTTCGACCTGGACGATGCCGTGGCGCTGGCGCAACGTGTGCTGCCGGCCGTGGCGCCCGCGCTGGCCGCCCCCAGCCCCGCCGCCGAAACGCCCGGCGACCAGCCGCCGCAATTGGTGGGCGATACCCCGCCGATGCGTGCGCTGTTCCGCGCCATCGGTCGCCTGGCGCAGGCACCGCTGGCGGTGCTGATCACCGGCGAGACCGGCACCGGCAAGGAGCTGGTGGC
SST-23	Stenotrophomonas_maltophilia_FDAARGOS_92;Stenotrophomonas_maltophilia_FDAARGOS_325;Stenotrophomonas_maltophilia_K279a	GGTGGTGGTGATGTCGGCCTATACCGATGTAGCCAGCACGGCCGGCGCGTTCCGCGGTGGCGCGCATGAATTCCTGTCCAAGCCGTTCGATCTGGACGATGCGGTGGCACTGGCGCAACGGGTGCTGCCGGCCGTCGCACCGGCATTGGCGGCGGCCACACCTGCGGCCGAAGCGCATAGCGACCAACCGCCGCAACTGGTGGGCGATACCCCGCCGATGCGCGCGCTGTTCCGCGCCATCGGTCGCCTGGCGCAGGCACCGCTGGCGGTGCTGATCACCGGCGAGACCGGCACCGGCAAGGAGCTGGTGGC
SST-24	Stenotrophomonas_maltophilia_FDAARGOS_507	GGTGGTGGTGATGTCGGCCTATACCGATGTAGCCAGCACCGCCGGTGCGTTCCGTGGTGGTGCGCATGAGTTCCTGTCCAAGCCGTTCGATCTGGACGATGCGGTGGCGCTGGCGCAGCGCGTGCTGCCGGCGGTGGCACCGGCACTGGCCGCGGCCACACCTGCGGCCGAAGCGCATAGCGACCAACCGCCGCAACTGGTGGGCGATACCCCGCCGATGCGCGCGCTGTTCCGCGCCATCGGTCGCCTGGCACAGGCGCCGCTGGCGGTGCTGATCACTGGCGAAACCGGTACCGGCAAGGAGCTGGTGGC
SST-25	Stenotrophomonas_maltophilia_ISMMS2;Stenotrophomonas_maltophilia_ISMMS2R	GGTGGTGGTGATGTCGGCCTATACCGATGTGGCCAGCACGGCCGGTGCGTTCCGTGGTGGCGCGCATGAATTCCTGTCCAAACCGTTCGACCTGGACGACGCGGTGGCGCTGGCGCAGCGTGTGCTGCCGGCAATTGCGCCGGCACTGGCGGCGCCCACACCTGCGGCGGAAGCGCATAGCGACCAACCGCCGCAACTGGTGGGCGATACCCCGCCGATGCGCGCGCTGTTCCGTGCCATCGGCCGCCTGGCGCAGGCGCCGCTGGCGGTGCTGATCACCGGCGAGACCGGCACCGGCAAGGAGCTGGTGGC
SST-26	Stenotrophomonas_maltophilia_NCTC10257	GGTGGTGGTGATGTCGGCCTATACCGACGTAGCCAGCACGGCCGGCGCGTTCCGCGGTGGCGCGCATGAATTCCTGTCCAAGCCGTTCGATCTGGACGATGCGGTGGCACTGGCGCAACGGGTGCTGCCGGCCGTCGCACCGGCATTGGCGGCGGCCACACCTGCGGCCGAAGCGCATAGCGACCAACCGCCGCAACTGGTGGGCGATACCCCGCCGATGCGCGCGCTGTTCCGCGCCATCGGTCGCCTGGCGCAGGCACCGCTGGCGGTGCTGATCACCGGCGAGACCGGCACCGGCAAGGAGCTGGTGGC
SST-27	Stenotrophomonas_maltophilia_NCTC10258	GGTGGTGGTGATGTCGGCCTATACCGATGTAGCCAGCACGGCCGGCGCGTTCCGCGGTGGCGCGCATGAATTCCTGTCCAAGCCGTTCGATCTGGACGATGCGGTGGCACTGGCGCAACGGGTGCTGCCGGCCGTCGCCCCGGCATTGGCGGCGGCCACACCTGCGGCCGAAGCGCATAGCGACCAACCGCCGCAACTGGTGGGCGATACCCCGCCGATGCGCGCGCTGTTCCGCGCCATCGGTCGCCTGGCGCAGGCACCGCTGGCGGTGCTGATCACCGGCGAGACCGGCACCGGCAAGGAGCTGGTGGC
SST-28	Stenotrophomonas_maltophilia_NCTC10259	GGTGGTGGTGATGTCGGCCTATACCGATGTCGCCAGCACCGCCGGTGCGTTCCGCGGGGGCGCGCATGAATTCCTGTCCAAGCCGTTCGACCTGGACGATGCCGTGGCGCTGGCGCAGCGTGTGCTGCCGGCCGTGGCGCCCGCGCTGGCCGCCCCCAGCCCCGCCGCCGAAACGCCCGGCGACCAGCCGCCGCAACTGGTGGGCGATACCCCCCCGATGCGTGCGCTGTTCCGCGCCATCGGTCGCCTGGCGCAGGCACCGCTGGCGGTGCTGATCACCGGCGAGACCGGCACCGGCAAGGAGCTGGTGGC
SST-29	Stenotrophomonas_maltophilia_NCTC10498	GGTGGTGGTGATGTCGGCCTATACCGATGTAGCCAGCACGGCCGGCGCGTTCCGCGGTGGTGCGCATGAATTCCTGTCCAAGCCGTTCGATCTGGACGATGCGGTGGCACTGGCGCAACGGGTGCTGCCGGCCGTCGCACCGGCATTGGCAGCGGCCACACCTGCGGCCGAAGCGCATAGCGACCAACCGCCGCAACTGGTGGGCGATACCCCGCCGATGCGCGCGCTGTTCCGCGCCATCGGTCGCCTGGCGCAGGCACCGCTGGCGGTGCTGATCACCGGCGAGACCGGCACCGGCAAGGAGCTGGTGGC
SST-30	Stenotrophomonas_maltophilia_NCTC13014	GGTGGTGGTGATGTCGGCCTACACCGATGTGGCCAGCACGGCCGGCGCGTTCCGCGGTGGCGCGCATGAATTCCTGTCCAAGCCGTTCGATCTGGACGATGCCGTGGCGCTGGCGCAGCGAGTGCTGCCGGCCGTTGCACCGGCACTGGCGGCGCCCACACCGGCGGCGGAAGCGCATGGTGACCAGCCGCCGCAACTGGTGGGCGATACCCCGCCGATGCGCGCGCTGTTCCGTGCCATCGGCCGCCTGGCGCAGGCACCGCTGGCGGTGCTGATCACCGGCGAGACCGGCACCGGCAAGGAGCTGGTGGC
SST-31	Stenotrophomonas_maltophilia_R551-3	GGTGGTGGTGATGTCGGCCTATACCGATGTCGCCAGTACCGCCGGTGCGTTCCGCGGCGGCGCGCATGAATTCCTGTCCAAACCGTTTGATCTGGACGATGCGGTGGCACTGGCACAGCGCGTGCTGCCGGCGGTGGCACCGGCCATGGCCGCAGCGGCGCCGACCACCGCAACCTCCAGCGACCAGCCGCCGCAACTGGTGGGTGATACACCGCCGATGCGCGCGCTGTTCCGCGCCATCGGCCGCCTGGCGCAGGCACCACTGGCGGTGCTGATCACCGGCGAGACCGGCACCGGCAAGGAGCTGGTGGC
SST-32	Stenotrophomonas_maltophilia_W18	GGTGGTGGTGATGTCGGCCTACACCGATGTGGCCAGCACGGCCGGTGCGTTCCGCGGTGGCGCGCATGAATTCCTGTCCAAGCCGTTCGATCTGGACGATGCCGTGGCGCTGGCGCAGCGTGTGCTGCCGGCCGTTGCACCGGCACTGGCGGCGCCCACACCGGCGGCGGAAGCGCATGGCGACCAGCCGCCACAACTGGTGGGCGATACCCCGCCGATGCGCGCGCTGTTCCGTGCCATCGGCCGCCTGGCGCAGGCACCGCTGGCGGTGCTGATCACCGGCGAGACCGGCACCGGCAAGGAGCTGGTGGC
SST-33	Stenotrophomonas_maltophilia_X28	GGTGGTGGTGATGTCGGCCTATACCGATGTGGCCAGCACCGCCGGTGCGTTCCGTGGTGGTGCGCATGAGTTCCTGTCCAAGCCGTTCGACCTGGACGATGCCGTGGCGCTGGCGCAGCGTGTGCTGCCGGCGGTGGCGCCCGCGCTGGCCGCGTCCAGCCCCGCCGCCGAAACGCCCAGCGACCAGCCGCCGCAACTGGTGGGTGATACGCCGCCGATGCGCGCGCTGTTCCGCGCCATCGGCCGCCTGGCGCAGGCACCACTGGCGGTGCTGATCACCGGCGAGACCGGTACCGGCAAGGAACTGGTGGC

## Sheet: Sheet4. tycC database
ST-tycC	Strains	Sequences
SST-1	Stenotrophomonas maltophilia AA1;Stenotrophomonas_maltophilia_AA1	TGTACACCGAACAGGTCGAGCCGGTATTCAACACCGTGCCGGGCGTGGCCCGCACCGCACTGGTCGGCGTAGGTGCCGCCGGCGCGCAGGTGCCGGTGCTGTGCGTGGAGCTGCAGCGCGGCCAGAGCGACAGCCCGGCGCTGCAGGAGGCCCTGCGCGCGCATGCGGCCGCGCGCGTGGCCGACGCCGGCCTGCAGCACTTCCTGGTGTATCCAGCGTTCCCCGTCGATATCCGTCACAACGCCAAGATCGG
SST-2	Stenotrophomonas sp. ZAC14A_NAIMI4_1	TGTACACCGAACAGGTCGAGCCGGTGTTCAACACCGTGCCGGGCGTGGCCCGCACCGCACTGGTCGGCGTAGGTGCCGCCGGCGCGCAGGTGCCGGTGCTGTGCGTGGAGCTGCAGCGCGGCCAGAGCGACAGCCCGGCGCTGCAGGAGGCCCTGCGCGCGCATGCGGCCGCCCGCGTGGCCGACGCCGGCCTGCAGCACTTCCTGGTGCATCCAGCGTTCCCCGTCGATATCCGTCACAACGCCAAGATCGG
SST-3	Stenotrophomonas sp. ZAC14D1_NAIMI4_1;Stenotrophomonas sp. ZAC14D1_NAIMI4_6	TGTACACCGAACAGGTCGAGCCGGTGTTCAACACCGTGCCGGGCGTGGCCCGCACCGCACTGGTCGGCGTAGGTGCCGCCGGCGCGCAGGTGCCGGTGCTGTGCGTGGAGCTGCAGCGCGGCCAGAGCGACAGCCCGGCGCTGCAGGAGGCCCTGCGCGCGCATGCGGCCGCGCGCGTGGCCGACGCCGGCCTGCAGCACTTCCTGGTGCATCCAGCGTTCCCCGTCGATATCCGTCACAACGCCAAGATCGG
SST-4	Stenotrophomonas sp. SAU14A_NAIMI4_5	TGTACACCGAACAGCTCGAGCCGGTGTTCAACACCGTGCCCGGCGTGGCTCGCACCGCGCTGGTGGGCGTCGGCGCCGCCGGTGCGCAGGTGCCGGTGCTGTGCGTGGAACTGCAGCGTGGGCAGTCCGACGGCCCGGCGCTGCAGGAGACCCTGCGCGCGCATGCGGCCGCTCATGCCGCCGACGCCGGACTGCAGCACTTCCTGGTGCATCCGGCCTTCCCCGTCGATATCCGTCACAACGCCAAGATCGG
SST-5	Stenotrophomonas maltophilia SJTL3;Stenotrophomonas maltophilia FZD2;Stenotrophomonas_maltophilia_SJTL3	TGTACACCGAACAGGTCGAGCCGGTGTTCAACACCGTGCCCGGCGTGGCGCGCACGGCACTGGTTGGCGTTGGCCCGGCGGGTGCGCAGGTGCCGGTGCTGTGCGTGGAACTGCAGCGTGGCCAGAGCGACAGTCCGGCGTTGCGCGAGGCGCTGCGCGCCCAGGCCACCCTGCGATTGCCCGAGGCGAACCTGCAGCACGTACTGATGCATCCCGCGTTCCCCGTCGATATCCGTCACAACGCCAAGATCGG
SST-6	Stenotrophomonas sp. ESTM1D_MKCIP4_1	TGTACACCGAACAGGTCGAGCCGGTGTTCAATACCGTGCAAGGCGTGGCCCGCACCGCGCTGGTGGGCGTGGGCGCTGCCGGCGCGCAGGTGCCGGTGCTGTGCGTGGAACTGCAGCGCGGGCAGTCCGATGGCCCGGCACTGCAGGAGGCGCTGCGTGTGCATGCGGATGCGCGCATGGCCGGCGCCGGCCTGCAGCACTTCCTGGTGCATCCGGCCTTTCCCGTCGATATCCGTCACAACGCCAAGATCGG
SST-7	Stenotrophomonas maltophilia 291	TGTACACCGAGCAGGTCGAGCCGATGTTCAACACCGTGGCCGGCGTGGCGCGCACTGCGCTGGTCGGCGTCGGCGCTGCCGGTGCGCAGGTGCCGGTGCTGTGCGTGGAGCTGCAGCGTGGCCAGGCCGACAGCCCGGCACTGCAGGAAGCGCTGCGTGCCAAGGCAGCGGCATGCCTGGCCGAGGCTGGCCTGCAGTACTTCCTGATACATCCTGCGTTCCCCGTCGATATCCGTCACAACGCCAAGATCGG
SST-8	Stenotrophomonas maltophilia OUC_Est10;Stenotrophomonas_maltophilia_OUC_Est10	TGTACACCGAACAGGTCGAGCCGGTGTTCAATACCGTGCCCGGGGTGGCGCGCACGGCGCTGGTCGGTGTTGGTCCGGCCGGTGCGCAGGTGCCGGTGCTGTGCGTGGAGCTGCAACGTGGTCAGTCAGACAGCCCGGCGCTGCAGGAAGCGCTGCGTGCGCACGCAGCAGCCCGCGCGCCAGAAGCCGGCCTGCAGCACTTCCTGGTGCATCCGGCGTTCCCCGTCGATATCCGTCACAACGCCAAGATCGG
SST-9	Stenotrophomonas maltophilia 142;Stenotrophomonas_maltophilia_FDAARGOS_325	TGTACACCGAACAGGTCGAGCCGGTGTTCAACACCGTCGCAGGCGTGGCGCGCACCGCGCTGGTCGGTGTCGGCGCCGCCGGTGCGCAGGTGCCGGTGCTGTGCGTGGAACTGCTGCGCGGCCAGTCCGACAGCCCGGCGCTGCAGGAAGCGCTGCGTGCGCACGCCGCAGCGCGCACGCCTGAGGCCGGCCTGCAGCACTTCCTGGTGCATCCGGCGTTCCCCGTCGATATCCGTCACAACGCCAAGATCGG
SST-10	Stenotrophomonas maltophilia 2013-SM4	TGTACACCGAGCAGGTCGAGCCGGTGTTCAACACCGTGGCCGGCGTGGCGCGCACGGCACTGGTCGGCGTCGGCGCCGCCGGCGCGCAGGTGCCGGTGCTGTGCGTGGAGCTGCAGCGCGGCCAGTCCGACAGCCCGGCGCTGCAGGAAGCGCTGCGTGCGCACGCAGCCGCCCGCCTGCCGGAGGCCGGCCTGCAGCACTTCCTGGTGCATCCGGCGTTCCCCGTCGATATCCGTCACAACGCCAAGATCGG
SST-11	Stenotrophomonas maltophilia CSM2;Stenotrophomonas_maltophilia_CSM2	TGTACACCGAACAGGTCGAGCCGGTGTTCAATACCGTGCCCGGCGTAGCACGCACGGCACTGGTTGGCGTTGGCCCGGCGGGTGCGCAGGTGCCGGTGCTGTGTGTGGAACTGCAGCGTGGCCAGAGCGACAGCCCGGCGTTGCGCGAGGCGCTGCGCGCCCAGGCCACCCTGCGATTGCCCGAGGCGAACCTGCAGCACGTACTGATGCATCCCGCGTTCCCCGTCGATATCCGTCACAACGCCAAGATCGG
SST-12	Stenotrophomonas maltophilia ISMMS3;Stenotrophomonas_maltophilia_ISMMS3	TGTACACCGAGCAGGTCGAGCCGGTGTTCAACACCGTCGCTGGCGTGGCGCGCAGCGCGCTGGTCGGTGTTGGCGCCGCAGGTGCGCAGGTGCCGGTGCTGTGCGTGGAACTGCAGCGTGGCCAGTCCGACAGCCCGGCACTGCAGGAAGCACTGCGCGCTCACGCAGCAGCCCGCGTGCCTGAGGCCGGCCTGCAGCACTTCCTGGTGCATCCGGCCTTCCCCGTCGATATCCGTCACAACGCCAAGATCGG
SST-13	Stenotrophomonas maltophilia JV3;Stenotrophomonas_maltophilia_JV3	TGTACACCGAACAGGTCGAGCCGGTGTTCAACACCGTGCCCGGCGTAGCGCGCACGGCACTGGTTGGCGTTGGCCCGGCGGGTGCGCAGGTGCCGGTGCTGTGCGTGGAACTGCAACGTGGCCAGAGCGACAGCCCGGCGTTGCGCGAGGCGCTGCGCGCCCAGGCCACCCTGCGATTGCCCGAGGCGAACCTGCAGCACGTACTGATGCACCCCGCGTTCCCCGTCGATATCCGTCACAACGCCAAGATCGG
SST-14	Stenotrophomonas maltophilia SJTH1;Stenotrophomonas maltophilia WGB211;Stenotrophomonas_maltophilia_SJTH1	TGTACACCGAACAGGTCGAGCCGGTGTTCAACACGGTGGCCGGCGTGGCACGTACTGCGCTGGTCGGCGTTGGCCCGGCGGGTGCGCAGGTGCCAGTGCTGTGCGTGGAGCTGCAGCGTGGCCAGGCAGACAGCCCGGCGCTGCAGGAAGCGCTGCGTGCGCATGCCGCAGCCCGCGTGGCAGAGGCCGGCCTGCAGCACTTCCTGGTGCATCCGGCGTTCCCCGTCGATATCCGTCACAACGCCAAGATCGG
SST-15	Stenotrophomonas maltophilia SoD9b	TGTACACCGAGCAGGTCGAGCCGGTGTTCAACACCGTGGCCGGCGTGGCGCGCACGGCACTGGTCGGCGTCGGCGCCGCCGGCGCGCAGGTGCCGGTGCTGTGCGTGGAACTGCAGCGCGGCCAGTCCGACAGCCCGGCGCTGCAGGAAGCGCTGCGTGCACATGCCGCCGCCCGCTTGCCGGAGGCCGGCCTGCAGCACTTCCTGGTGCATCCGGCGTTCCCCGTCGATATCCGTCACAACGCCAAGATCGG
SST-16	Stenotrophomonas maltophilia PEG-305	TGTACACCGAGCAGGTCGAGCCGGTGTTCAACACCGTGGCCGGCGTGGCGCGCACGGCACTGGTCGGCGTCGGCGCCGCCGGCGCGCAGGTGCCGGTGCTGTGCGTGGAACTGCAGCGCGGCCAGTCCGACAGCCCGGCGCTGCAGGAAGCGCTGCGTGCGCACGCCGCCGCCCGCCTGCCGGAGGCCGGCCTGCAGCACTTCCTGGTGCATCCGGCGTTCCCCGTCGATATCCGTCACAACGCCAAGATCGG
SST-17	Stenotrophomonas sp. ZAC14D2_NAIMI4_6	TGTACACCGAACAGGTGGAGCCGGTGTTCAACACGTTGCCTGGCGTGGCCCGCACCGCACTGGTGGGCGTGGGCGCGGCCGGTGCGCAGGTGCCGGTGCTGTGCGTGGAGCTGCAGCGCGGCACCCGCGATGGCGCGGCCCTGCAGGAGGCGCTGCGCGCCCATGCGGCCACGCACTTGCCCGCTGCCGGCGTGCAGCACTTCCTGGTCCACCCGGGCTTCCCGGTGGACATTCGACACAACGCCAAGATCGG
SST-18	Stenotrophomonas maltophilia 2013-SM13;Stenotrophomonas maltophilia 2013-SM12	TGTACACCGAGCAGGTCGAGCCGGTGTTCAACACCGTGGCCGGCGTGGCGCGCACGGCACTGGTCGGCGTCGGCGCCGCCGGCGCGCAGGTGCCGGTGCTGTGCGTGGAACTGCAGCGCGGCCAGTCCGACAGCCCGGCGCTGCAGGAAGCGCTGCGTGCACATGCCGCCGCCCGCCTGCCGGAGGCCGGCCTGCAGCACTTCCTGGTGCATCCGGCGTTCCCCGTCGATATCCGTCACAACGCCAAGATCGG
SST-19	Stenotrophomonas maltophilia GYH	TGTACACCGAACAGGTCGAGCCGGTGTTCAACACCGTGGCCGGGGTGGCGCGCACCGCGCTGGTGGGAGTGGGAGCTGCCGGAGCGCAGCGGCCGGTGCTGTGCGTGGAACTGCAACGTGGCCAGTCCGACAGCCCGGCGCTGCAGGACGCGCTGCGCGCGCATGCCGCCGCCCGCCTGCCCGAGGCCGGCCTGCAGCACTTCCTGGTGCATCCATCATTCCCCGTCGATATCCGTCACAACGCCAAGATCGG
SST-20	Stenotrophomonas_maltophilia_AB550	TGTACACCGAACAGGTCGAGCCGGTGTTCAATACCGTGCCCGGCGTGGCACGCACGGCACTGGTCGGCGTTGGCCCGGCGGGTGCGCAGGTACCGGTGCTGTGCGTGGAACTGCAGCGTGGCCAGAGCGACAGCCCGGCGTTGCAGGAAGCGCTGCGTGCGCATGCCGCAGCGCGCACGCCTGAGGCCGGCCTGCGGCACTTCCTGATGCATCCCGCGTTCCCCGTCGATATCCGTCACAACGCCAAGATCGG
SST-21	Stenotrophomonas_maltophilia_D457	TGTACACCGAACAGGTCGAGCCGGTGTTCAATACCGTGCCCGGCGTGGCACGCACGGCACTGGTCGGCGTTGGCCCGGCGGGTGCGCAGGTACCGGTGCTGTGCGTGGAACTGCAGCGTGGCCAGAGCGACAGCCCGGCGTTGCAGGAAGCGCTGCGTGCGCATGCCGCAGCGCGCACCCCTGAGGCCGGCCTGCAGCACTTCCTGATGCATCCCGCGTTCCCCGTCGATATCCGTCACAACGCCAAGATCGG
SST-22	Stenotrophomonas_maltophilia_FDAARGOS_92;Stenotrophomonas_maltophilia_K279a;Stenotrophomonas_maltophilia_NCTC10498	TGTACACCGAACAGGTCGAGCCGGTGTTCAACACCGTCGCAGGCGTGGCGCGCACCGCGCTGGTCGGTGTCGGCGCCGCCGGTGCGCAGGTGCCGGTGCTGTGCGTGGAACTGCTGCGCGGCCAGTCCGACAGCCCGGCGCTGCAGGAAGCGCTGCGTGCGCATGCCGCAGCGCGCACGCCTGAGGCCGGCCTGCAGCACTTCCTGGTGCATCCGGCGTTCCCCGTCGATATCCGTCACAACGCCAAGATCGG
SST-23	Stenotrophomonas_maltophilia_FDAARGOS_507	TGTACACCGAACAGGTCGAGCCGGTGTTCAACACCGTCGCAGGCGTGGCGCGCACCGCGCTGGTCGGTGTCGGCGCCGCCGGTGCGCAGGTGCCGGTGCTGTGCGTGGAACTGCTGCGCGGCCAGTCCGACAGCCCGGCGCTGCAGGAAGCGCTGCGTGTGCATGCCGCAGCGCGCACGCCTGAGGCCGGCCTGCAGCACTTCCTGGTGCATCCGGCGTTCCCCGTCGATATCCGTCACAACGCCAAGATCGG
SST-24	Stenotrophomonas_maltophilia_ISMMS2;Stenotrophomonas_maltophilia_ISMMS2R	TGTACACCGAACAGGTCGAGCCGGTGTTCAACACCGTGGCCGGGGTGGCGCGCACTGCACTGGTCGGTGTCGGCGCCCCGGGTGCACAGGTGCCGGTGCTGTGCGTGGAACTGCAGCGTGGCCAGGCAGACAGCCCGGCGCTGCAGGAAGCGCTGCGTGCGCATGCCGCAGCGCGCACGCCTGAGGCCGGCCTGCAGCACTTCCTGGTGCATCCGGCGTTCCCCGTCGATATCCGTCACAACGCCAAGATCGG
SST-25	Stenotrophomonas_maltophilia_NCTC10257;Stenotrophomonas_maltophilia_NCTC10258	TGTACACCGAACAGGTCGAGCCAGTGTTCAACACCGTCGCAGGCGTGGCGCGCACCGCGCTGGTCGGTGTCGGCGCCGCCGGTGCGCAGGTGCCGGTGCTGTGCGTGGAACTGCTGCGCGGCCAGTCCGACAGCCCGGCGCTGCAGGAAGCGCTGCGTGCGCATGCCGCAGCGCGCACGCCTGAGGCCGGCCTGCAGCACTTCCTGGTGCATCCGGCGTTCCCCGTCGATATCCGTCACAACGCCAAGATCGG
SST-26	Stenotrophomonas_maltophilia_NCTC10259	TGTACACCGAACAGGTCGAGCCGGTGTTCAATACCGTGCCCGGCGTGGCACGCACGGCACTGGTCGGCGTTGGCCCGGCGGGTGCGCAGGTACCGGTGCTGTGCGTGGAACTGCAGCGTGGCCAGAGCGACAGCCCGGCGTTGCAGGAAGCGCTGCGTGCGCATGCCGCAGCGCGCACCCCTGAGGCCGGCCTGCAGCACTTCTTGATGCATCCCGCGTTCCCCGTCGATATCCGTCACAACGCCAAGATCGG
SST-27	Stenotrophomonas_maltophilia_NCTC13014	TGTACACCGAACAGGTCGAGCCGGTGTTCAACACCGTCGCAGGCGTGGCACGTACCGCACTGGTCGGCGTTGGTGCCCCGGGTGCGCAGGTACCGGTGCTGTGCGTGGAACTGCAGCGTGGCCAGTCCGACAGCCCGGCACTGCAGGAAGCGCTGCGTGCGCATGCCGCAGCCCGTGTGGCAGAGGCCGGTCTGCAGCACTTCCTGGTGCATCCATCGTTCCCCGTCGATATCCGTCACAACGCCAAGATCGG
SST-28	Stenotrophomonas_maltophilia_R551-3	TGTACACCGAGCAGGTCGAGCCGGTGTTCAATACCGTGCCCGGGGTTGCGCGCACGGCGCTGGTCGGTGTTGGTCCGGCCGGTGCGCAGGTGCCGGTGCTGTGCGTGGAGCTGCAACGTGGTCAGTCAGACAGCCCGGCGCTGCAGGAAGCGCTGCGTGCGCACGCAGCAGCCCGCGCGCCAGAAGCCGGCCTGCAGCACTTCCTGGTGCATCCGGCGTTCCCCGTTGATATCCGTCACAACGCCAAGATCGG
SST-29	Stenotrophomonas_maltophilia_W18	TGTACACCGAACAGGTCGAGCCGGTGTTCAACACTGTCGCAGGCGTGGCACGTACCGCACTGGTCGGCGTTGGAGCCCCGGGTGCGCAGGTACCGGTGCTGTGCGTGGAACTGCAGCGTGGCCAGTCCGACAGCCCGGCACTGCAGGAAGCGCTGCGTGCGCATGCCGCAGCCCGTGTGGCAGACGCCGGTCTGCAGCACTTCCTGGTGCATCCATCGTTCCCCGTCGATATCCGTCACAACGCCAAGATCGG
SST-30	Stenotrophomonas_maltophilia_X28	TGTACACCGAACAGGTCGAGCCGGTGTTCAACACCGTGGCAGGCGTGGCGCGCACCGCGCTGGTCGGCGTTGGCGTGGCCGGTGCGCAGGTGCCGGTGCTGTGCGTGGAACTGCTGCGCGGCCAGTCCGACAGCCCGGCACTGCAGGAAGCGCTGCGTGCGCATGCCGCAGCGCGCACGCCTGAGGCCGGCCTGCAGCACTTCCTGGTGCATCCGGCCTTCCCCGTCGATATCCGTCACAACGCCAAGATCGG

## Sheet: Sheet5. ribA database
ST-ribA	Strains	Sequences
SST-1	Stenotrophomonas maltophilia AA1;Stenotrophomonas sp. ZAC14D1_NAIMI4_1;Stenotrophomonas sp. ZAC14D1_NAIMI4_6;Stenotrophomonas_maltophilia_AA1	CTGCCCTCGCTGGGCTACCTGCGCGAACCGGGGCCGATGCCGGAAGGCTGGAGCGCGGGCGACGACTTCGATGCCGGCGCGGTGGAACTGGCCCGCCTTGGTCTGCTGCTGCCGGCGATGGTGGCTGTGCGCCTGGACACCGGCGACCACACCTTCGACGGTGCGGCCGAGGTGGCCCTGTGCGACCTGGCCGAAGGCGCGGCCCATGCCGCCCATGATTACGAACTGGTGGCGCGCTCGCCGGTGCCGCTGCGCGACGTCGGCATGACCACCTTCGCGGTGTTCCGCGGCGGCGTGGCCCAGCGCGACCAGGTCGCGATCATCGTCGG
SST-2	Stenotrophomonas sp. ZAC14A_NAIMI4_1	CTGCCCTCGCTGGGCTACCTGCGCGAACCGGGCCCGATGCCGGAAGGCTGGAGCGCGGGCGACGACTTCGATGCCGGCGCGGTGGAACTGGCCCGCCTGGGCCTGCTGCTGCCGGCGATGGTGGCCGTGCGCCTGGACACCGGCGACCACACCTTCGACGGTGCGGCCGAGGTGGCCCTGTGCGACCTGGCCGAAGGCGCGGCCCACGCCGCCCACGATTACGAACTGGTGGCGCGTTCGCCGGTGCCGCTGCGCGATGTCGGCATGACCACCTTCGCGGTGTTCCGCGGCGGCGTAGCCCAGCGCGACCAGGTGGCGATCATCGTCGG
SST-3	Stenotrophomonas sp. SAU14A_NAIMI4_5	CTGCCCTCGCTGGGCTACCTGCGCGAGCCAGGCCCGATGCCGGACGGCTGGAGTGCAGGCGACGCCTTCGATGCCGGCGCGGTGGAACTGGCCCGCCTGGGCCTGCTGCTGCCGGCGATGGTGGCCGTGCGCCTGGACGCCGATGACCACACCTTTGACGGTGCGGCCGAGGTGGCCCTGTGCGACCTGGCAGAAGGCGCGGCCCATGCGGCCCACGATTACGAACTGGTGGCGCGTTCGCCGGTGCCGCTGCGCGATGTCGGCATGACCACCTTCGCGGTGTTCCGCGGCGGCGTGGCCCAGCGCGACCAGGTGGCGATCATCGTCGG
SST-4	Stenotrophomonas maltophilia SJTL3;Stenotrophomonas_maltophilia_SJTL3	CTGCCCTCGCTGGGCTACCTGCGCGAGCCGGGCCCGATGCCGGACGGCTGGAGCGCGGGTGACGCCTTCGATGCCGGCGCGGTGGAACTGGCCCGCCTCGGCCTGCTGCTGCCGGCAATGGTGGCGGTGCGCCTGGACGCCGAAGATCGCACCTTCGATGGCGCGGCCGAGGTTGCGCTGTGCGACCTGGCCGAAGGCGCTGCCCATGCGGCCCACGATTACGAACTGGTGGCACGTTCGCCGGTACCGCTGCGCGATGTCGGCATGACCACCTTCGCGGTGTTCCGTGGCGGCGTGGCCCAGCGCGACCAGGTCGCGATCATCGTCGG
SST-5	Stenotrophomonas sp. ESTM1D_MKCIP4_1	CTGCCCTCGCTGGGCTACCTGCGCGAGCCGGGCCCGATGCCGGACGGCTGGAGTGCCGGCGATGCCTTTGATGCCGGGGCGGTGGAACTGGCCCGGCTGGGCCTGCTGCTGCCGGCGATGGTGGCCGTGCGCCTGGAGGCCGATGACCCCACCTTCGACGGTGCCGCCGAGGTGGCCCTGTGCGACCTGGCCGAGGGCGCGGCCCATGCGGCGCACGATTACGAACTGGTGGCGCGCTCGCCGGTGCCGCTGCGCGATGTGGGCATGACCACCTTCGCGGTGTTCCGCGGCGGCGTGGCCCAGCGCGACCAGGTGGCGATCATCGT---
SST-6	Stenotrophomonas maltophilia 291	CTGCCCTCGCTGGGCTACCTGCGCGAGCCTGGCCCGATGCCGGACGGCTGGACGGCCGGCGATGCCTTCGATGCCGGCGCGGTGGAGCTGGCCCGCCTGGGCCTGCTGCTGCCGGCGATGGTGGCCGTGCGCCTGGATGCAGATGACAGCACCTTCAATGGCGCTGCTGAAGTGGCGCTTTGCGATCTGGCCGAGGGCGCGGCCCACGCCACCCACGACTACGAACTGGTGGCGCGCTCGCCGGTGCCGCTGCGCGACGTCGGCATGACCACCTTCGCGGTGTTCCGCGGCGGCGTGGCCCAGCGCGACCAGGTCGCGATCATCGTCGG
SST-7	Stenotrophomonas maltophilia FZD2	CTGCCCTCGCTGGGCTACCTGCGCGAGCCGGGCCCGATGCCGGACGGCTGGAGCGCGGGTGACGCCTTCGATGCCGGCGCGGTGGAACTGGCCCGCCTCGGCCTGCTGCTGCCGGCAATGGTGGCGGTGCGCCTGGACGCCGAAGACCGCACCTTTGACGGTGCTGCCGAAGTGGCCCTGTGCGACCTGGCCGAAGGCGCTGCCCATGCGGCCCACGATTACGAACTGGTGGCACGTTCGCCGGTACCGCTGCGCGACGTCGGCATGACCACCTTCGCGGTGTTCCGCGGCGGCGTGGCCCAGCGCGACCAGGTCGCGATCATCGTCGG
SST-8	Stenotrophomonas maltophilia OUC_Est10;Stenotrophomonas_maltophilia_OUC_Est10	CTGCCCTCGCTGGGCTACCTGCGCGAGCCCGGCCCGATGCCGGACGGCTGGAGCACCGGTGACGCCTTCGATGCAGGCGCCGTGGAACTGGCCCGCCTCGGCCTGTTGCTGCCGGCCATGGTGGCGGTGCGCCTGGGTGCCGAAGACCGCACCTTCGACGGTGCTGCCGAAGTGGCCCTGTGCGATCTGGCCGAAGGCGCAGCCCATGCGGCCCACGATTACGAACTGGTGGCGCGTTCGCCGGTACCGCTGCGCGACGTCGGCATGACCACCTTCGCGGTGTTCCGCGGCGGCGTGGCCCAGCGCGACCAGGTGGCGATCATCGTCGG
SST-9	Stenotrophomonas maltophilia 142	CTGCCCTCGCTGGGCTACCTGCGCGAACCCGGGCCGATGCCCGAAAGTTGGAGCGCCGGCGACGCCTTCGATGCCGGCGCGGTGGAGCTTGCCCGCCTGGGTCTGCTGCTGCCAGCGATGGTCGCGGTGCGCCTGGACGTCGATGACCACACTTTCGACGGTGCGGCCGAGGTGGCCCTGTGCGACCTGGCCGAAGGCGCAGCACATGCGGCCCACGACTACGAACTGGTGGCGCGTTCGCCGGTTCCGCTGCGCGACGTCGGCATGACCACCTTTGCAGTCTTCCGCGGCGGCGTGGCGCAGCGCGACCAGGTCGCGATCATCGTCGG
SST-10	Stenotrophomonas maltophilia 2013-SM4	CTGCCCTCGCTGGGTTACCTGCGCGAGCCCGGCCCCATGCCCGACGGCTGGGCGGCCGGCGACGCCTTCGATGCCGGCGCGGTGGAGCTGGCCCGCCTGGGCCTGCTGCTGCCGGCAATGGTCGCGGTGCGCCTGGACGTGGATGACCACACGTTCGACGGTGCCGCCGAGGTGGCCCTGTGCGACCTGGCCGAAGGCGCAGCACATGCGGCCCACGACTACGAACTGGTGGCGCGTTCGCCGGTACCGCTGCGCGACGTCGGCATGACCACCTTCGCGGTGTTCCGCGGCGGCGTGGCCCAGCGCGACCAGGTCGCGATCATCGTCGG
SST-11	Stenotrophomonas maltophilia CSM2;Stenotrophomonas_maltophilia_CSM2	CTGCCCTCGCTGGGCTACCTGCGCGAGCCCGGCCCGATGCCGGACGGCTGGAGCGCTGGTGACGCCTTCGATGCCGGCGCGGTGGAGCTGGCCCGCCTGGGCCTGCTGCTGCCGGCGATGGTGGCTGTGCGCCTGGACGTCGATGACCGCACCTTCGATGGCGCTGCTGAAGTGGCGCTTTGCGATCTGGCCGAGGGCGCCGCACACGCCGCCCACGACTACGAACTGGTGGCGCGCTCGCCGGTGCCGCTGCGCGACGTCGGCATGACAACCTTCGCGGTGTTCCGCGGCGGCGTGGCCCAGCGCGACCAGGTCGCGATCATCGTCGG
SST-12	Stenotrophomonas maltophilia ISMMS3;Stenotrophomonas_maltophilia_ISMMS3	CTGCCCTCGCTGGGCTACCTGCGCGAGCCCGGCCCGACGCCGGAGGGCTGGAGCGCCGGTGACGCCTTCGATGCCGGCGCGGTTGAACTGGCCCGCCTGGGCCTGCTGCTGCCGGCAATGGTGGCCGTGCGCCTGGATGCAGGTGACGCCACCTTCGACGGCGCCGCCGAAGTCGCCCTGTGCGACCTCGCCGAGGGCGCGGCCCATGCGGCCCACGATTACGAACTGGTGGCCCGCTCCCCGGTGCCGCTGCGCGACGTTGGCATGACCACCTTCGCGGTGTTCCGCGGCGGCGTGGCGCAGCGCGACCAGGTGGCGATCATCGTCGG
SST-13	Stenotrophomonas maltophilia JV3;Stenotrophomonas_maltophilia_JV3	CTGCCCTCGCTGGGCTACCTGCGCGAGCCCGGCCCGATGCCGGATGGCTGGAGCGCTGGTGACGCCTTCGATGCCGGCGCGGTGGAGCTGGCCCGCCTGGGCCTGCTGCTGCCGGCAATGGTGGCTGTGCGCCTGGATGCAGATGACAGCACCTTCAATGGCGCTGCCGAAGTGGCGCTTTGCGATCTGGCCGAGGGCGCGGCCCACGCCACCCACGACTACGAACTGGTGGCGCGCTCGCCGGTGCCGCTGCGCGACGTCGGCATGACCACCTTCGCGGTGTTCCGCGGCGGCGTGGCCCAGCGCGACCAGGTCGCGATCATCGTCGG
SST-14	Stenotrophomonas maltophilia SJTH1;Stenotrophomonas_maltophilia_SJTH1	CTGCCCTCGCTGGGCTACCTGCGCGAGCCCGGCCCGATGCCGGACGGCTGGAGCGCCGGTGACGCCTTCGATGCCGGCGCCGTGGAGCTGGCCCGCCTCGGCCTGTTGCTGCCGGCCATGGTGGCGGTGCGCCTGGATGCCGAAGACCGCACCTTCGACGGTGCTGCCGAAGTGGCCCTGTGCGATCTGGCCGAAGGCGCGGCCCACGCGGCCCACGATTACGAACTGGTGGCGCGTTCGCCGGTACCGCTGCGCGATGTCGGCATGACCACCTTCGCGGTGTTCCGCGGTGGCGTGGCCCAGCGCGACCAGGTGGCGATCATCGTCGG
SST-15	Stenotrophomonas maltophilia WGB211	CTGCCCTCGCTGGGCTACCTGCGCGAGCCCGGCCCGATGCCGGACGGCTGGAGCGCCGGTGATGCCTTCGATGCCGGCGCCGTGGAGCTGGCCCGCCTGGGCCTGCTGCTGCCGGCCATGGTGGCCGTGCGCCTGGATGCCGATGACCGCACCTTCGATGGTGCCGCCGAAGTGGCCCTGTGCGATCTGGCCGAAGGCGCGGCCCATGCGGCCCACGATTACGAACTGGTGGCGCGTTCGCCGGTACCGCTGCGCGATGTCGGCATGACCACCTTCGCGGTGTTCCGCGGTGGCGTGGCCCAGCGCGACCAGGTGGCGATCATCGTCGG
SST-16	Stenotrophomonas maltophilia SoD9b	CTGCCCTCGCTGGGTTACCTGCGCGAGCCCGGCCCGATGCCCGACGGCTGGGCAGCCGGCGACGCCTTCGATGCCGGCGCGGTCGAGCTGGCCCGCCTGGGCCTGCTGCTGCCGGCGATGGTCGCGGTGCGCCTGGACGTGGATGACCACACTTTCGACGGTGCCGCCGAGGTGGCCCTGTGCGACCTGGCCGAAGGCGCAGCACATGCGGCCCACGACTACGAACTGGTGGCGCGTTCGCCGGTACCGCTGCGCGACGTCGGCATGACCACCTTCGCGGTGTTCCGCGGCGGCGTGGCCCAGCGTGACCAGGTCGCGATCATCGTCGG
SST-17	Stenotrophomonas maltophilia PEG-305	CTGCCCTCGCTGGGCTACCTGCGCGAACCCGGCCCGATGCCCGAAGACTGGAGTGCCGGCGACGCCTTCGATGCCGGCGCGGTGGAGCTGGCCCGCCTGGGCCTGCTGCTGCCGGCGATGGTGGCGGTGCGCCTGGATGCGGAGGACACGACCTTTGCGGGTGCGGCCGAAGTGGCGTTGTGCGACCTGGCCGAGGGCGCGGCACACGCCGCCCACGATTACGAACTGGTCGCCCGTTCGCCGGTGCCGCTGCGCGATGTCGGCATGACCACCTTCGCGGTGTTCCGCGGCGGCGTGGCCCAGCGCGACCAGGTCGCGATCATCGTCGG
SST-18	Stenotrophomonas sp. ZAC14D2_NAIMI4_6	CTGCCGTCGCTGGGCTACCTGCGCGAACCCGGCCCGATGCCCGATGGCTGGAGCGCAGGCGATGCCTTCGACGCCGGTGCGGTGGAACTGGCCCGCCTGGGCCTGCTGCTGCCGGCCATGGTGGCGGTGCGCCTGGCCGCCGATGACCGTACCTTCGATGGCGCAGCGGAAGTGGCCCTGTGCGATCTGGCCGAAGGCGCCGCCCATGCGGCCCACGATTACGAACTGGTGGCGCGTTCGCCGGTACCGCTGCGCGATGTGGGCATGACCACCTTCGCCGTGTTCCGCGGCGGCGTGGCCCAGCGCGACCAGGTGGCGATCATCGTCGG
SST-19	Stenotrophomonas maltophilia 2013-SM13;Stenotrophomonas maltophilia 2013-SM12	CTGCCCTCGCTGGGCTACCTGCGCGAACCCGGCCCGATGCCCGAAGACTGGAGTGCCGGCGACGCCTTCGATGCCGGCGCGGTGGAGCTGGCCCGCCTGGGCCTGCTGCTGCCGGCGATGGTGGCGGTGCGCCTGGATGCGGAGGACACGACCTTTGCGGGTGCGGCCGAAGTGGCGTTGTGCGACCTGGCCGAGGGCGCGGCACACGCCGCCCACGATTACGAACTGGTCGCCCGTTCGCCGGTGCCGCTGCGCGACGTCGGCATGACCACCTTCGCGGTGTTCCGCGGGGGCGTGGCCCAGCGCGACCAAGTCGCAATCATCGTCGG
SST-20	Stenotrophomonas maltophilia GYH	CTGCCCTCGCTGGGTTATCTGCGCGAGCCGGGGCCGATGCCGGCTGACTGGAGCGCCGGTGATGCCTTCGATGCCGGTGCGGTGGAACTGGCGCGCCTGGGCCTGCTGCTGCCGGCGATGGTCGCGGTACGCCTGGAATCCGGCGACAGCACCTTCGACGGTGCCGCTGAAGTAGCCCTGTGCGACCTGGCCGAGGGTGCGGCACACGCGGCCCACGACTACGAACTGGTGGCGCGTTCGCCAGTGCCGCTGCGCGACGTCGGCATGACCACCTTCGCGGTGTTCCGCGGCGGCGTGGCGCAGCGCGACCAGGTGGCGATCATCGTCGG
SST-21	Stenotrophomonas_maltophilia_AB550	CTGCCCTCGCTGGGCTACCTGCGCGAGCCCGGCCCGATGCCGGACGACTGGACGGCCGGCGACGCCTTCGATGCCGGCGCGGTGGAGCTGGCCCGCCTGGGCCTGCTGCTGCCGGCGATGGTGGCGGTGCGCCTGGATGCAGAGGACATGACCTTTGCGGGTGCGGCCGAAGTGGCGTTGTGCGACCTGGCCGAGGGCGCGGCACACGCCGCCCACGATTACGAACTGGTCGCCCGTTCGCCGGTACCGCTGCGCGACGTCGGCATGACCACCTTCGCGGTGTTCCGCGGCGGCGTGGCCCAGCGCGACCAGGTCGCGATCATCGTCGG
SST-22	Stenotrophomonas_maltophilia_D457	CTGCCCTCGCTGGGCTACCTGCGCGAGCCCGGCCCGATGCCGGACGACTGGACGGCCGGCGACGCCTTCGATGCCGGCGCGGTGGAGCTGGCCCGCCTGGGCCTGCTGCTGCCGGCGATGGTGGCGGTGCGCCTGGATGCAGCTGACCGCACCTTCGAGGGTGCTGCTGAAGTGGCGCTCTGCGATCTGGCCGAAGGCGCGGCCCACGCCGCCCACGATTACGAACTGGTCGCCCGTTCGCCGGTACCGCTGCGCGACGTCGGCATGACCACCTTCGCGGTGTTCCGCGGCGGCGTGGCCCAGCGCGACCAGGTCGCGATCATCGTCGG
SST-23	Stenotrophomonas_maltophilia_FDAARGOS_92;Stenotrophomonas_maltophilia_FDAARGOS_325;Stenotrophomonas_maltophilia_NCTC10258;Stenotrophomonas_maltophilia_NCTC10498	CTGCCCTCGCTGGGCTACCTGCGCGAACCCGGGCCGATGCCCGAAAGCTGGAGCGCCGGCGACGCCTTCGATGCCGGCGCGGTGGAGCTTGCCCGCCTGGGTCTGCTGCTGCCAGCGATGGTCGCGGTGCGCCTGGACGTCGATGACCACACTTTCGACGGTGCGGCCGAGGTGGCCCTGTGCGACCTGGCCGAAGGCGCAGCACATGCGGCCCACGACTACGAACTGGTGGCGCGTTCGCCGGTTCCGCTGCGCGACGTCGGCATGACCACCTTTGCAGTCTTCCGCGGCGGCGTGGCGCAGCGCGACCAGGTCGCGATCATCGTCGG
SST-24	Stenotrophomonas_maltophilia_FDAARGOS_507	CTGCCCTCGCTGGGCTACCTGCGCGAACCCGGGCCGATGCCCGAAAGCTGGAGCGCCGGCGACGCCTTCGATGCCGGCGCGGTGGAGCTTGCCCGCCTGGGTCTGCTGCTGCCAGCGATGGTCGCGGTGCGCCTGGACCTCGATGACCACACTTTCGACGGTGCGGCCGAGGTGGCCCTGTGCGACCTGGCCGAAGGCGCAGCACATGCGGCCCACGACTACGAACTGGTGGCGCGTTCGCCGGTTCCGCTGCGCGACGTCGGCATGACCACCTTTGCAGTCTTCCGCGGCGGCGTGGCGCAGCGCGACCAGGTCGCGATCATCGTCGG
SST-25	Stenotrophomonas_maltophilia_ISMMS2;Stenotrophomonas_maltophilia_ISMMS2R	CTGCCCTCGCTGGGCTATCTGCGCGAACCGGGCCCGATGCCGGACGGCTGGAGTGCCGGTGACGCCTTCGACGCAGGCGCCGTGGAACTGGCCCGCCTTGGCCTGTTGCTGCCGGCCATGGTGGCGGTGCGCCTGGACGCCGAAGATCGCACCTTCGATGGCGCGGCCGAGGTGGCCCTGTGCGACCTCGCCGAAGGCGCAGCACATGCCGCGCATGATTACGAACTGGTGGCGCGTTCACCGGTGCCGTTGCGCGATGTCGGCATGACCACCTTCGCGGTGTTCCGTGGCGGCGTCGCCCAGCGTGACCAGGTCGCGATCATCGTCGG
SST-26	Stenotrophomonas_maltophilia_K279a;Stenotrophomonas_maltophilia_NCTC10257	CTGCCCTCGCTGGGCTACCTGCGCGAACCCGGGCCGATGCCCGAAAGCTGGAGCGCCGGCGACGCCTTCGATGCCGGCGCGGTGGAGCTTGCCCGCCTGGGTCTGCTGCTGCCGGCCATGGTGGCGGTGCGCCTGGACCTCGATGACCACACTTTCGACGGTGCGGCCGAGGTGGCCCTGTGCGACCTGGCCGAAGGCGCAGCACATGCGGCCCACGACTACGAACTGGTGGCGCGTTCGCCGGTTCCGCTGCGCGACGTCGGCATGACCACCTTTGCAGTCTTCCGCGGCGGCGTGGCGCAGCGCGACCAGGTCGCGATCATCGTCGG
SST-27	Stenotrophomonas_maltophilia_NCTC10259	CTGCCCTCGCTGGGCTACCTGCGCGAGCCTGGCCCGATGCCGGACGACTGGACGGCCGGCGATGCCTTCGATGCCGGCGCGGTGGAGCTGGCCCGCCTGGGCCTGCTGCTGCCGGCGATGGTGGCGGTGCGCCTGGATGCAGAGGACATGACCTTTGCGGGTGCGGCCGAAGTGGCGTTGTGCGACCTGGCCGAGGGCGCGGCACACGCCGCCCACGATTACGAACTGGTCGCCCGTTCGCCGGTACCGCTGCGCGACGTCGGCATGACCACCTTCGCGGTGTTCCGCGGCGGCGTGGCCCAGCGCGACCAGGTCGCGATCATCGTCGG
SST-28	Stenotrophomonas_maltophilia_NCTC13014	CTGCCCTCGCTGGGCTACCTGCGCGAGCCCGGCCCGATGCCGGACGGCTGGAGCGCCGGTGACGCCTTCGATGCCGGCGCCGTGGAACTGGCACGCCTCGGCCTGTTGCTGCCGGCCATGGTGGCGGTGCGCCTGGACGCCGATGACCGCACCTTCGACGGTGCTGCCGAAGTGGCCCTGTGCGACCTCGCCGAAGGCGCGGCCCATGCAGCCCACGATTACGAACTGGTGGCACGTTCGCCGGTACCGCTGCGCGATGTCGGCATGACCACCTTCGCGGTGTTCCGCGGTGGCGTGGCCCAGCGCGACCAGGTGGCGATCATCGTCGG
SST-29	Stenotrophomonas_maltophilia_R551-3	CTGCCCTCGTTGGGCTACCTGCGCGAGCCGGGCCCGATGCCGGACGGCTGGAGCGCCGGTGACGCCTTCGATGCCGGCGCTGTTGAACTGGCCCGGCTTGGCCTGCTGCTGCCGGCGATGGTGGCGGTGCGCCTGGACGCCGATGACCGCACCTTCGATGGCGCGGCCGAAGTCGCGCTGTGCGACCTGGCTGAAGGCGCGGCGCATGCCGCCCACGATTACGAACTGGTGGCACGTTCACCGGTGCCGCTGCGCGACGTCGGCATGACCACCTTCGCGGTGTTCCGCGGCGGCGTGGCCCAGCGCGACCAGGTGGCGATCATCGTCGG
SST-30	Stenotrophomonas_maltophilia_W18	CTGCCCTCGCTGGGCTACCTGCGCGAACCCGGCCCGATGCCGGACGGCTGGAGCGCCGGTGACGCCTTCGATGCCGGCGCCGTGGAACTGGCCCGCCTCGGCCTGTTGCTGCCGGCGATGGTGGCGGTGCGCCTGGACGCCGATGACCGCACCTTCGACGGTGCTGCCGAAGTGGCCCTGTGCGACCTCGCCGAAGGCGCGGCCCATGCGGCCCACGATTACGAACTGGTGGCACGTTCGCCAGTACCGCTGCGCGATGTCGGCATGACCACCTTCGCGGTGTTCCGCGGTGGCGTGGCCCAGCGCGACCAGGTCGCGATCATCGTCGG
SST-31	Stenotrophomonas_maltophilia_X28	CTGCCCTCGCTGGGCTACCTGCGCGAGCCCGGTCCAATGCCGGAAGGCTGGAGCGCGGGCGACGCCTTCGATGCCGGCGCGGTGGAGCTGGCCCGCCTGGGCCTGCTGCTGCCAGCGATGGTGGCCGTGCGCCTGGACGCCGATGACCACACCTTCGACGGTGCTGCCGAGGTGGCCCTGTGCGACCTGGCCGAAGGCGCAGCACATGCGGCCCACGACTACGAACTGGTAGCGCGTTCGCCGGTGCCGCTGCGCGACGTCGGCATGACCACCTTCGCAGTCTTCCGCGGTGGCGTGGCCCAGCGCGACCAGGTGGCGATCATCGTCGG

## Sheet: Sheet6.HiSST loci 1vs.2vs.3vs.4
1 locus	2 loci			3 loci				4 loci
yvoA	yvoA	glnG	yvoA + glnG	yvoA	glnG	ribA	yvoA + glnG + ribA	yvoA	glnG	ribA	tycC	yvoA + glnG + ribA + tycC		Resume
10	10	9	109	10	9	9	1099	10	9	9	9	10999		Cumulative loci	ST cumulative frequency
19	19	19	1919	19	19	19	191919	19	19	19	18	19191918		1	33
11	11	10	1110	11	10	10	111010	11	10	10	10	11101010		2	36
7	7	6	76	7	6	6	766	7	6	6	7	7667		3	36
1	1	1	11	1	1	1	111	1	1	1	1	1111		4	36
12	12	11	1211	12	11	11	121111	12	11	11	11	12111111
8	8	7	87	8	7	7	877	8	7	7	5	8775
20	20	20	2020	20	20	20	202020	20	20	20	19	20202019
13	13	12	1312	13	12	12	131212	13	12	12	12	13121212
14	14	13	1413	14	13	13	141313	14	13	13	13	14131313
9	9	8	98	9	8	8	988	9	8	8	8	9888
17	17	17	1717	17	17	17	171717	17	17	17	16	17171716
15	15	14	1514	15	14	14	151414	15	14	14	14	15141414
5	5	4	54	5	4	4	544	5	4	4	5	5445
16	16	16	1616	16	16	16	161616	16	16	16	15	16161615
15	15	15	1515	15	15	15	151515	15	15	15	14	15151514
6	6	5	65	6	5	5	655	6	5	5	6	6556
4	4	3	43	4	3	3	433	4	3	3	4	4334
2	2	2	22	2	2	2	222	2	2	2	2	2222
3	3	1	31	3	1	1	311	3	1	1	3	3113
18	18	18	1818	18	18	18	181818	18	18	18	17	18181817
21	21	21	2121	21	21	21	212121	21	21	21	20	21212120
22	22	22	2222	22	22	22	222222	22	22	22	21	22222221
24	24	23	2423	24	23	23	242323	24	23	23	9	2423239
25	25	24	2524	25	24	24	252424	25	24	24	23	25242423
23	23	23	2323	23	23	23	232323	23	23	23	22	23232322
26	26	25	2625	26	25	25	262525	26	25	25	24	26252524
10	10	23	1023	10	23	26	102326	10	23	26	22	10232622
25	25	26	2526	25	26	26	252626	25	26	26	25	25262625
27	27	27	2727	27	27	23	272723	27	27	23	25	27272325
28	28	28	2828	28	28	27	282827	28	28	27	26	28282726
29	29	29	2929	29	29	23	292923	29	29	23	22	29292322
30	30	30	3030	30	30	28	303028	30	30	28	27	30302827
31	31	31	3131	31	31	29	313129	31	31	29	28	31312928
32	32	32	3232	32	32	30	323230	32	32	30	29	32323029
33	33	33	3333	33	33	31	333331	33	33	31	30	33333130
Sum of unique ST = 33	Sum of unique ST = 36			Sum of unique ST = 36				Sum of unique ST = 36
