# Supplementary material for: High-Throughput Short Sequence Typing Schemes for Pseudomonas aeruginosa and Stenotrophomonas maltophilia Pure Culture and Environmental DNA
Source: Microorganisms. 2023 Dec 27;12(1):48. doi: 10.3390/microorganisms12010048 (PMC10819370; doi:10.3390/microorganisms12010048)
Supplement: Supplementary file 1 [file microorganisms-12-00048-s001.zip › TableS3_Loci Identity Matrix Score.xlsx]

## Sheet: CONTENT
	DATASET S3: This supplemental file contains the highly specific and distinguishing loci retained during the selection process for HiSST scheme development. - The first sheet presents the average allele identity matrix scores for: (i) 33 loci retained for P. aeruginosa HiSST scheme development, and (ii) 39 loci retained for S. maltophilia HiSST scheme development. - The second and third sheets enc…

## Sheet: Average Identity Scores
Average of alleles identity matrix scores of the most specific and discriminatory loci selected for HiSST scheme. The highlighted green alleles represent potential alleles selected for the next stages in the development of the HiSST scheme, showing the highest average nucleotide polymorphisms (i.e., lowest identity scores) among each allele at the corresponding locus.
P. aeruginosa (n = 45 strains tested)	Average Identity Score
	Allele	helD	cobN	czcA_2	ttgE	pepN	gcvP_1	pheT	gyrB	purL	aaeB	parC	bcsA	aidB_2	acrB_3	recB	mscK_1	betT_1	cobQ	ftsY	bvgS_3	dnaX	gcvP_2	gcvT_3	gdhB	lgrB_1	cph2_4	sdaA	wprA	pkn1_1	shlB_1	cheA_2	btuB	oprP_2
	Score	0.991282	0.993509	0.995476	0.992872	0.993668	0.993352	0.986311	0.994441	0.996154	0.991094	0.993835	0.994684	0.992094	0.995754	0.991361	0.994449	0.991857	0.992278	0.997168	0.974012	0.993848	0.993141	0.993555	0.993882	0.991789	0.989804	0.988272	0.993905	0.985306	0.989152	0.990089	0.983677	0.988256
S. maltophilia (n = 23 strains tested)	Average Identity Score
	Allele	bglX_1	motB_1	fabD_1	gcvA_1	htpG_2	moxC	hisB	cheA_1	proP_2	bglB	yvoA	mepM_3	queG	lptE	czcR	qseC_6	nagA_1	sbnA	ribA	tamA	mnmE	glnG	macB_1	fadH	murR	pepA_2	xerD	ubiH_1	mutS	cca	folK_2	hemC	htrB_2	nagK_2	csbC	glyS	tycC-1	tycC-2	ynfM_2
	Score	0.951494	0.952468	0.954784	0.925152	0.956974	0.934169	0.936775	0.949727	0.943758	0.949355	0.929173	0.949416	0.946286	0.948424	0.943264	0.922117	0.934078	0.932779	0.930455	0.941775	0.932169	0.928727	0.94503	0.932299	0.939797	0.96129	0.93539	0.9349	0.948416	0.922762	0.957528	0.949831	0.946377	0.926277	0.932372	0.949186	0.929091	0.906563	0.932558

## Sheet: Allele Sequences P. aeruginosa
# Profile per Allele	helD	cobN	czcA_2	ttgE	pepN	gcvP_1	pheT	gyrB	purL	aaeB_1	parC	bcsA	aidB_2	acrB_3	recB	mscK_1	betT_1	cobQ	ftsY	bvgS_3	dnaX	gcvP_2	gcvT_3	gdhB	lgrB_1	cph2_4	sdaA	btuB	wprA	pkn1_1	oprP_2	shlB_1	cheA_2
1	ATGACCTTCGACGCCGCGTTCCAGCAGCTCGGCGAGCGGATGGCCGGCGGGGCCCTGGCGGAAACGGCGCTGGCGCCGTTCACCCATCTGCTGATCGACGAGTTCCAGGATGTCTCGCCGCAGATCGTCCTCTGGCTACAGGCGTTGCACCGTCGCCTGGCAA---CCCAGGGCACCGCGCCGAGCCTGATGGCCATCGGCGACGACTGGCAGTCGATCTACGGCTGGCGCGGCAGTTCGCCGGAGCTGTTCATCGACTTCGACCGGCACTTCCCCTCGCGTGGGCGGGGACGCAAGAGCGCGCTGCTGGTGCTGGAAACCAACTACCGCTCCGTCGAACCGATCATTCGCGACGGCGAGAAGGTGCTGGCCGGGGTGCGTTTCAAGCAGGACAAGACC…	ATGCACCTGTTGCGCACCCAACCCGGCGGCTTCGTTCCCGACGACGGCATCGCCCACCTGGCCCAGACTCCCGCCGAGCTGGTGATCCTCTGCAGCGGCGATTCGCACCTCGCATTGCTGGCCGAGGCCGCCCGTGCGCTGCCGGACGACTACCCGAGCCTGCGCCTGGCCAACCCCATGCAGTTGCAGAACCACGCCTCGGTGGACCTCTACGTCGAGGAAGTGCTGCGGCACGCGCGGGTGATCCTGCTTTCGCTGCACGGCGGCATCGGCTACTGGCGCTACGGCGTGGAGCAACTGGTGGCGCTGGCCGAGCGCGGCGCGCTGCTGATCCCGGTGCCCGGCGACGACCGCCCCGACCCGGAGCTGAGCGCCCTTGGCAACCTGCCGGCGGAGCAG…	ATGTTCGAACGCATCATCCAATTCGCCATCGAGCAACGCTGGCTGGTCCTGCTGGCGGTGCTGGGGATGGCCGGGGTCGGCATCGGCAGCTACCAGAAGCTGTCCATCGACGCGGTCCCGGACATCACCAACGTCCAGGTGCAGATCAATACCGCCGCCCCCGGCTACTCGCCGCTGGAAGTGGAGCAGCGGATCACCTACCCGGTGGAGACCGTCATGGCCGGCCTGCCGGGTTTGCAGGAAACCCGTTCGCTGTCGCGGCCGGGGATTTCCCAGGTGACGGTGATCTTCGAGGAGGGCACCGACATCTACTTCGCCCGCCAGCAGGTCAACGAACGCCTGAGCACGGCGCGCGAGCAACTGCCGGAAGACATCTCGCCGACCCTCGGGCCGATCTCC…	ATGTCCTTCAACCTTTCCGCCTGGGCGTTGCAGAATCGCCAGATCGTCCTGTACCTGATGATCCTGCTTGGCGCGGTCGGCGCGCTGTCCTACAGCAAGCTGGGGCAGAGCGAAGACCCGCCGTTCACCTTCAAGGCCATGGTGGTGCAGACCAACTGGCCGGGCGCCAGCGCCGAAGAGGTGGCCCGGCAGGTCACCGAGCGTATCGAGAAGAAGCTGATGGAAACCGGCGACTACGATCGCATCGTGTCCTTCTCCCGCCCCGGCGTCTCGCAGGTGACCTTCATGGCCCGCGAGGACATCCATTCCAGCGAGATCCCCGAACTCTGGTACCAGATCCGCAAGAAGATCAGCGACATTCGCGCCACCTTGCCGCAAAGCATCCAGGGCCCGTTCTTC…	ATGCGCACCGAGCAACCGAAAGTCATCCACCTCAAGGACTATCAGGCGCCGGACTACCTGATCGACGAGACCCACCTGAAGTTCGAACTGTTCGAAGACCACAGCCTGGTACACGCCGAGTTGAAGCTGCGGCGCAACCCCGAGCGCGGCGCCGGCCTGCCGCCGCTGTTGCTGCATGGCCAGCAACTGGAGCTGCTGGCGCTCGAACTGGACGGCCAGGCGCTCGGCGCGGACGACTACCAACTGGACGACGAGCAGCTCGGGGTGCAACCGCGGCAGGCCGAATTCGTCCTCAGGAGCACGGTGCGTATCCATCCGGAGAGCAACACCGCGCTGGAAGGCCTGTACAAGTCCGGCAAGATGTTCTGCACCCAGTGCGAGGCCGAGGGTTTCCGCAAG…	ATGACCGATAACCTGAACCTCGGCACCATCGACCTGGGCACCGACGACGAATTCATCGCCCGCCATATCGGCCCGCGCGCCGCCGACACCCAGGCCATGCTCCAGCGCCTGGGCTACGACTCGCTGGACACGCTGATCGGCAACGTGATCCCGGACAGCATCAAGGGCAGCAGCGTGCTCGACCTGCCGGCCGGCATGGGCGAGGCCGAGGCGCTGGCCAGCCTGAAGGCGATCGCCGCGCGCAATCGCGCGTTGCGTTCCTTCATCGGCCAGGGCTACTACAACTGCCACACCCCGGCACCGATCCTGCGCAACCTCCTGGAGAACCCGGCCTGGTACACCGCCTACACGCCGTACCAGCCGGAAATCTCCCAGGGCCGCCTGGAGGCGCTGCTGAAC…	GCAGGTTTCCCATGACGAGCTGGTCGCTCGCCTGTCCATGGTCGGCCTCGAGGTCGACGCCGACCTGCCGGTCGCCGGCGCCTTCAGCGGCGTGGTGGTCGGCGAGGTGCTTTCGACCGAACAGCATCCGGACGCCGACAAGCTGCGCGTCTGCCAGGTCAGCAACGGCAGCGAGACCTTCCAGGTCGTCTGCGGTGCGCCCAACGTACGCGCGGGCCTGAAGATTCCCTTCGCCATGATCGGCGCCGAACTGCCGGGCGACTTCAAGATCAAGAAAGCCAAGCTGCGTGGCGTCGAGTCCTTCGGCATGCTCTGCTCGGCCAAGGAATTGCAGATCAGCGAAGAGAACGGCGGTCTGCTCGAGCTGCCGGCCGACGCGCCGGTCGGCCAGGACGTCCG…	ATGAGCGAGAACAACACGTACGACTCTTCCAGCATCAAGGTGCTGAAGGGGCTGGATGCCGTACGCAAGCGCCCCGGCATGTACATCGGCGACACCGACGATGGCACCGGTCTGCACCACATGGTGTTCGAGGTGGTGGATAACTCCATCGACGAAGCGCTGGCCGGTTACTGCAGCGAAATCAGCATCACCATCCATACGGATGAGTCGATCACTGTCCGCGACAATGGACGCGGTATTCCGGTGGATATCCACAAGGAAGAAGGGGTTTCTGCGGCGGAAGTGATCATGACCGTCCTCCACGCCGGCGGCAAGTTCGACGACAACACCTACAAAGTGTCCGGCGGCTTGCACGGTGTGGGCGTCTCGGTGGTGAACGCGCTGTCCCATGAGCTGCGC…	ATGCTGATCCTGCGCGGCGCTCCCGCCCTTTCCGCTTTCCGCCACGGCAAACTGCTCGAGCAACTGACCCAGCACGTACCTGCCGTTACCGGGCTGTACGCTGAGTTCGCGCATTTCGCCGACGTCACCGGCGCGCTCACCGCCGACGAGGAGCAGGTGCTGGCGCGGCTGCTGAAATACGGCCCGAGCGTGCCGGTGCAGGAGCCCAGCGGACGGCTGTTCCTGGTGGTGCCGCGCTTCGGCACCATCTCGCCGTGGTCGAGCAAGGCCTCCGACATCGCCCGCAACTGCGGCCTGGCGAAGATCGACCGGCTGGAGCGCGGCATTGCCTACTATGTGCAGGGCGAACTGTCCGAGAGCGACGCCCAGCAGGTCGCCGCCCGCCTGCATGACCGCATG…	ATGAGTGGCCGCTCCGCTGGTTTCGCCCTGCCCAGCCGCGACGAGTGGCGGCGCGCGCTGGCCGAGTGGGCGCGCAGCGACGGGGCGACCTGGATCTACGTGTTCAAGGTGCTCTGCGCGGCCTTCCTGACCCTCTGGCTGGCGATGCGCCTGGAGTTGCCGCAACCGAGCACGGCGACCATCACCGTGTTCATCGTCATGCAGCCGCAGAGCGGCCAGGTGTTCGCCAAGAGCTTCTACCGCATCCTCGGCACCCTGGTCGGCCTCAGCGTGATGGTCACCCTGATCGCCCTGTTCGCCCAGGAGCGGGTGCTGTTCCTGCTCAGCTCGGCGATCTGGATCGGTCTCTGCACCGCCGGGGCCGCCCGCTACCGTGACTTCCGCTCCTACGCCTGCGTG…	ATGAGCGAATCCCTCGATCTGAGCCTGGAAGGGGTCGAACGCCGGTCGTTGGCCGAGTTCACCGAGCAGGCCTATCTGAATTATTCCATGTACGTGATCATGGACCGCGCCCTGCCGCATATCGGCGACGGCCTGAAACCGGTGCAGCGACGCATCGTCTACGCCATGAGCGAACTGGGGCTGGATGCCGATTCCAAGCACAAGAAGTCGGCGCGCACCGTCGGCGACGTGCTCGGCAAGTTCCACCCGCACGGCGACTCGGCCTGCTACGAGGCCATGGTGCTGATGGCGCAGCCGTTCTCCTATCGCTATCCGCTGGTGGACGGCCAGGGCAACTGGGGGGCGCCGGACGATCCCAAGTCCTTCGCCGCCATGCGTTATACCGAGGCGCGCCTGTCG…	ATGTCTTCACGCAAGATCGGGCTCAACCTGGTGGTCATCGTCGCCCTGGCCGCCCTCTTCACCGGCATCTGGGCCCTGTACAACCGTCCGGTCAGCGTACCGGACTGGCCGGAACGCATCTCCGGCTTCTCCTTCTCGCCGTTCCGCCTCAACCAGAATCCGCAGAGCGGCCGCTACCCCAGCGCCGAACAGATGCGCGCCGACCTGGAACTGGTCGCCCGGCACACCCACAGCATCCGCACCTATTCGGTCCAGGGCGCGCTCGGCGACATCCCGGCGCTGGCCGAGGCGTTCGGCCTGCGCGTCAGCCTGGGCATCTGGCTCGGCCCGGACCTGGCCGGCAACGAGGCCGAGATCGCCCGCGCCATCCGCATCGCCAACGAGTCGCCGAGCGTGGTG…	ATGACCGCCATGCCCGAAGTACTTCGCGAAGATACGCTGAACATCCCCGACAGCCGTGGGCTGAATCTCTACACCTGCGATCCGGCCCTGGAGCGGCTGCTGGAGGTATACCTGCCGCCGGCGTTGCTCGCCGAATGGCGGCCGCTCCTCGAACGGCTCGGCGCCCGTGCCGGCGGCGAGCTGGACGTGCTGGCGCTGGCGGCGGACAAGAACCCGCCGGTGCTGGCGCCGCGCACCCGCCGCGGCGAGGATTTGCAGAGCATTCGCAAGCATCCGGACTACGTCGCCCTCGAACAGGTGGCCTATGCCGAACTTGGCCTGGCTTCCATGAGCCATCGCCCGGACGGCCCGCCGCCGCTGGTGAAGTATGCGCTCACCCACCTGTTCGTACAGGCCGAG…	ATGTCCGAATTCTTCATCAAGCGGCCGAACTTCGCCTGGGTGGTGGCCCTGTTCATCTCCCTGGCCGGCCTGCTGGTCATTTCCAAATTGCCGGTAGCGCAGTACCCCAATGTCGCGCCGCCACAGATCACCATCACCGCCACCTATCCCGGCGCCTCGGCGAAGGTGCTGGTGGACTCCGTCACCAGTGTGCTCGAGGAGTCGCTGAACGGCGCCAAGGGCCTGCTCTACTTCGAGTCGACCAACAACTCCAACGGCACCGCCGAGATCGTCGTCACCTTCGAGCCGGGCACCGATCCGGACCTGGCCCAGGTGGACGTGCAGAACCGCCTGAAGAAAGCCGAGGCGCGCATGCCGCAGGCGGTGCTGACCCAGGGCCTGCAGGTCGAGCAGACCAGC…	ATGAGCCAGCAGCAGATGCCCGTGGCCCTCGATCCGCTGGACTTCCCGTTGCACGGCAGCCGCCTGATCGAGGCCAGCGCCGGTACCGGCAAGACGTTCACCATCGCCCTGCTATACGTACGCCTGGTCCTCGACCATGGCGGCGAGAACGCTTTCGGCCGGCCGCTGAGCCCGCCGGAAATCCTCGTGGTGACCTTCACCGATGCGGCGACCCAGGAACTCCGCGAGCGTATCCGCAGCCGCCTGGGCGAAGCGGCGCGTTGTTTCGCCGAGCCGCAGGAGCGCCACGACGGCCTGCTGGTCGCGTTGCGCCAGCAGTATCCCACCGAGCGCTGGCCGGGCTGCGCGCGCCTGCTGCGCCTGGCCGCGGAGTGGATGGACGAGGCCGCGGTATCGACC…	ATGAGGCGCGCCAGCCTGCATATGTTGCTCTGCCAGTTCGCCATGGCCCTGGGCCTGCTCCTGAGCCTGGGCAGCGAGGCCTGGGCCGCCAGGCCGGCTCTGCAGGCGGCCGTCGACCTGGAAGCGCCGGCCGCCCTGGCCGAGGACGCCAGCCTCGACCAGCTCAACGCGCAACTCGACCTGATCCGCCAGCGCGTCACCGCCGACGCCAGCGACGACCTCCTCGCCGAGTTGCGCCAGAGCGCGCTGCAAGTCCAGCGCCAGGCCGACGCCCTGCTCGCGCTGCGGGTGGCCGACATCGAGCGGCTCGACGATCAGTTGAAAGTGATCGGCCCGCCGCAGCCCGACGAGGCGGAAAGCCTCGCCGCCCAGCGCCAGGCCCTGACCCGGCAGAAGAAC…	CTGCTGTTCGCAGCAGTGGTCATCGGCTTCCCCCAGCGCGCCGGCGAATGGCTGCTGGCCGCGCAGACCTGGGCCTCGCAGACCGTCGGCTGGTACTACCTGCTGGCGATGACGCTGTACCTGATCTTCGTGGTGGTCACCGCGCTTTCCGGCTACGGCAAGATCAAGCTCGGTGCCGACCACGACGAGCCGGAATTCAGCTATCTGTCCTGGGCCGGCATGCTGTTCGCCGCCGGCATCAGCATCACCCTGTTCTTCTTCTGCGTATCCGAACCGCTGACCCACTTCCTCCAGCCGCCGCAAGGCGAGGCCGGTACCCAGGAAGCCGCGCGGCAGGCCATGGAACTGCTGTTCCTGCACTGGGGCCTGCACGGCTGGGGCGTGTTCGCCCTGGTGGCG…	ATGGTCCAGGGCACCACCTCGGACGCCGGCAAGAGCACCCTGGTGACCGCGCTGTGCCGCTGGCTGGCCCGGCGCGGCGTCGCGGTGGTGCCGTTCAAGCCGCAGAACATGGCGCTGAACAGCGCGGTCACCGCCGACGGCGGCGAGATCGGCCGCGCCCAGGCGGTCCAGGCCCAGGCCTGCCGGCTGGCGCCGCACACCGACATGAACCCGGTGCTGCTCAAGCCCAACACCGACATCGGCGCCCAGGTGATCATCCATGGCCGCGCGGTGACCAGCATGGACGCCGCCGCCTACCACGACTACAAGCGCGTGGCGATGGAAGCGGTGCTGGCTTCCCATGGGCGGCTCGCCGCCGCCTACCGGGTGGTGATGGTGGAGGGCGCCGGCTCGCCGGCG…	ATGGCCAGCCTGTTCCTCGGCCGCAAGGAAATCGACGACGACCTGCTCGACGACATCGAGACGCGCCTGCTGACCGCCGACGTCGGCGTCGAGGCCACCACCCTGATCGTGCAGAACCTGACCAAGCGCGTGGCGCGCAAGGAGCTGGCCGACAGCGGCGCGCTGTACAAGGCGCTGCAGGAAGAGCTGGCCAGCCTGCTGCGCCCGGTGGAGCAGCCGTTGCAGGTCGACGTCGCGCGCGAGCCCTATGTGATCCTGGTGGTCGGGGTGAACGGCGTGGGCAAGACCACCACCATCGGCAAGCTGGCGAAGAAGCTGCAACTCGAGGGCAAGAAGGTCATGCTGGCCGCCGGCGACACCTTCCGCGCCGCCGCCGTGGAGCAGTTGCAGGTCTGGGGC…	TTGCGCATCGAGAACTTCGCACCCATCGACAGCCAGGGTTTCCGTTTCCTGCTCCGGCCAGGTGACGAACCTCTGCTCGCGCTCATCGATCGCGCCCTGCCGCATATTAGCGGGCGCTACGGCGACGAACTGTTGCGCAGCTGGAGCGCCGGGCGGCGCCTGCGCTTCGACGAGCCCCGGGTGACGCTGTCGCCGGCGGAGCAGCGTTGGCTCTCCGCGCACCCGGTCGTGCCGGTGGTGATCAACCATTCCCTTGGCGCGCTCGGGCAACTGGATAACGAGGGGAGGCTGAGTGGTATCGGGCGTGACTATCTGGACCTGATCGGCAAGCGCAGTGGCCTGCGGTTTTCCTTCACTGGAGCACGGAACTTCGTCGAGACGAAAAGTCGACTGGATGCG…	CGAGCCACCGCCCGCGGACGACTATTACGAAGTCGATATGGATACCCTGGCCTACCTGGATGCCACGCCCGAGCCTGACGTGGTCGTGGTGGAGGAGCCGCTGCCGGCGGCGAAGCCGGCCACCGGCCTGGCCGCGGAGTGGCTGGAGCTGTTCCCGCGGCTCGGCCTCGGCGGCCTGACCGCCAGCATCGGTGCCAACTGTACGCTGGTAGCTGCCGACGACGACCACTGGCATCTGCATCTCGATCCGGGCCAGAGCGCGCTGTTCAACGCCACCCAGCAGCGGCGGCTGAACGATGCGCTGAACCAGCACCTGGGGCGCACCCTCAAACTGGAGGTGACCCTGCAGAAGCCTGAGCAGGAGACCCCGGCCCAGGCAGCGGCACGCCGGCGTGCCGA…	ATGTCGCAGACGCCGTCCCTCGCCCAGCTCCAGCCCGCCGATGCCTTCCTGCGCCGCCACCTCGGCCCCGATCCGGCGGAACAGCAGGCCATGCTGGATTTCCTCGGAGTTTCCACTCGCGCCGAACTGATCGTGCAGACGGTGCCGCCGGCGATCCGCCTCAACCGGCCGCTGGAACTGCCCGCCGCGCTCGACGAACAGGCCGCCCTGGCGCGCCTGCGCGGCTACGCCGGGCTCAACCAGCGCTGGACCAGCCTGATCGGCATGGGCTACTACGGCACCGTGACGCCGCCGGTGATCCTCCGCAACGTGCTGGAGAATCCCGGCTGGTACACCGCCTATACGCCCTACCAGCCGGAAATCGCCCAGGGCCGCCTGGAAGCGCTGCTGAATTTCCAG…	GTGATTCTCGCCGACGAGCAGGAAGAGTTCGGCGGCAGCCTGCTGGACACCCGCGAGACCCTCGACGGCAAGCCCGCCGCCGAGTGGGTCGCGGACGCCGTGGCCGAGCTGCAAGGCCTGCCGGAAGTCATCCTGCTACCGCGCTCCACGGTCAACGGCTACCACGACCACAACTTCCTCACCATCCACGAACGGCGCACCGACCACCTCGGCGAGGTCGCCCCGCTCGGCCAGGTCCGCCAGCGCGTGCACCGCGTACGCGCCAAGCGCGTGGTACTGGCCGCCGGCGCCCATGAGCGGCCGCTGGTCTACGGCAACAACGACCTGCCCGGCAACATGCTCGCCGGCGCGGTTTCCACCTATGTACGGCGCTACGGCGTGGCACCGGGCAAGAAACTG…	GTGCGCAGCTATCTCGAATGGCTGCTGGACAACCACTTCACCTTCCTCGGCTACGAGGAATTCAGCGTCGCCGACGAGGCCGACGGCGGGCGCATGGTCTACGACGAGAAATCCTTCCTCGGCCTGACCCGTCTGCTGCGTGCCGGCCTGAGCAAGGATGACCTGCACATCGAGGACTATGCCGTCGCCTACCTGCGCGAACCGGTCCTGCTGTCCTTCGCCAAGGCTGCCCATCCGAGCCGCGTGCACCGCCCGGCCTACCCGGACTACGTGTCGATCCGCGAGCTGGACGGCAAGGGCCGGGTGATCCGCGAGTGCCGCTTCATGGGCCTGTTCACCTCCTCGGTGTACAACGAGAGCGTCAACGACATTCCCTTCATCCGCGGCAAGGTCGCCGAA…	GTGTACGGCGAATATTCTCGGGAAAGCATTACCTGCCTGCTCGCCATACTATTATCCGGCCATCACTACTTATATATAGACCTGAAACAACCGGCGGCCTGGAATGCAGAGTTGTGCCGGCAGGTCGACTGCCGCCTGATCCTCGACTGCTCGACCACGCCGACGCCCGCCAACGGTCTTCCCTGCGTCCCGGTCAGGCACCTGCCTGCCGCTCCAGCCTCGGTCGCCCGGCCATGCTTCGCGGCGGACCAGATCGCCTACATCAACTTCTCCTCGGGCACCACCGGCCGCCCGAAAGCCATCGCCTGCACCCACGCCGGCATTACCCGTCTGTGCCTGGGCCAGTCGTTCCTCGCGTTCGCTCCGCAGATGCGCTTCCTGGTGAACTCGCCGCTATCC…	CTGCTGGAAGAAGGTGCGGACGAGGTATTCGAGGAAATCCTCGCCGCCGCTACGTCCTACTTCCAGACGCCCATCGCGCTCATTTCCATCCTCGACCATCAGCGCCAGTGGTTTCGCGCGAGCATCGGCCTCGATATCCGGCAGACGCCGCGACGGGATTCATTCTGCGCCTATGCGATCCTGGGCAAGGGAGTATTCGAGGTGGCCGACGCCACCCTCGACCCGCGCTTCCGGGACAACCCCTATGTGCAAGGCGAACCGCGCATCCGCTTCTACGCCGGGGCTCCGCTGGCCACCGCGGAAGGTCTCAACCTCGGCAGCCTCTGCGTCATCGACCGGGAACCACGCGGGCCGCTGGCCGAGCGGGACGTCGCCATGCTCGAGCACTTCGCCCGGCTG…	ATGTCCCTGAGTGTCTTCGATCTGTTCAAGATCGGCATCGGGCCGTCCAGCTCCCACACCGTGGGGCCGATGCGTGCCGCCGCGCGCTTTGCCGAGGGGCTGAGGCGCGAGGGGTTGCTGGAGGCCACTGCCAGCGTCAAGGTCGAGCTGTACGGCTCGCTCGGCGCCACCGGCAAGGGCCACGGCAGCGACAAGGCGGTACTGCTCGGCCTGGAGGGCGAGCAGCCGGACACGGTGGATACCGCCGCGATTCCCGCTCGGCTCGATGCCATCCGTTCCAGCGGCGAGCTGCGCCTGCTCGGCGAGCGGCCGATCCGCTTCGTCGAGAAGGAACACCTTGCGCTGATCCGCAAGCCGCTGGCCTACCATCCCAATGGCATGATCTTCCGTGCCTTCGAC…	ATGAACAGAGTTTTCCTGACCCCGGCAGCCGTGGCGCTGTGCGGCGCGTCTTCCCTGAGCCTGGCCGAACCGGTCAGCCTTGCCGACCAGGTGGTGACCGCCACCCGTACCGCCCAGACCGCTTCCCAGAGCCTGGCGGCGGTGAGCGTCATCGACCGCGAGGATATCGAGCGCAGCCAGGCGCGCAGCGTGCCGGAGCTGTTGCGCCAGGTACCCGGCGTGTCGCTGGCGAACAACGGCGGTTTCGGCAAGAACACCACGCTGTTCCTGCGCGGCACCGAGTCCGACCATGTGCTGGTGCTGATCGACGGCATCAAGGTCGGCTCGGCCAGCGCTGGCCTCACCGCGTTCCAGGACTTGCCGGTGGAGCTGATCGAGCGCATCGAGGTGGTCCGCGGG…	GTGCGGGTGCTCAACTGGAGCTGGGGCATCCACCGCGTCGGCGCTCGCGACGTCGATGGCGACGAGGTGGATTCGCTGGTGCGCTCGGGGATCGCCATGAGCGGCTACGAGGAGTTGCTCGAGGAATTCTTCCTCTGGCTGCGCAAGGAGCATCCGGACGTGCTGGTGGTCAACTCCGCCGGCAACGGCTCGTCCTACTCCGGTACAGACGAATACCGCCTGCCGTCCTCCTTCGTCACCGAGCAGTTGCTGGTGGTGGGCGGCCACCAGCGCAGCGAGCGCCAAGGCCTGGCGGTGGACGACCCGGCCTACGCGGTCAAGCGCAGCACCTCGAACGTCGACATGCGGGTGGATGTCACCGCCGCCGCCTGTACCCACGCCTCGACCCTGGAGAGGGAC…	TTGCAGGCAGCTTGCGCGTTCGGCCCGCCCGGGCGGCTATTCCGCGCCTGCGACGAGCAAGGACGCGAGGCGTTGCTGCTGCTCGCGGCGGTCGATGCCGACGAAGCGTTCTGGCAGCGCGAATGGGCATTGCGGCGCTGCCGTGCGGAGAGCCTGCCGCGAGTATTGTCGTCGCCCCGGTTGCGTCGTCATGCCTTCCAGTTGTTCGCTCCGCCGCGCTGGCCGATGCGCAGCCTGCTGGATTGGGCGCCAGCGCACCTGCCGCTGGAACCGCAATGCGCGCTGGTCCTCCTGGAGCAACTTATCGATGCGGTTCGCGCCTTGCAGCGGCGCGGCGTACAGGGCTTGTGGCTGGCGCCGCGGCAGATCCTGCTGGACGAGGGCGGGCGCCTGCTGTTC…	ATGTTCAACCCGGCCAACCAGACCCACTTCAGCCTCACCCTCGACGGCCTCCGCCACGACCTGCAGGTCCTCGCCTTCAACGGCCACGAAGGCATCAGTCGCCCCTACCGTTTCGAACTCGAACTGGTCGGAGAGCGCGCCGGCCTTGACCTCGAAACGTTCCTCCACCGGCCCGCCTTCCTCGCCTTCACCCCGCAGGGCCAGGGTGTCCACGGCCTGGTCTACGGCGCTGCCCAGGGCGATGCCGGCAAGCGCCTGACCCGCTATCGCCTCACCCTCGTCCCGCACCTGGCCTACCTCGCCCAGCGCAACAACCAGCGGATCTTCCAGCACCTCACGGTGCCGCAGATCGTCGCCCTGGTCCTCGAGGAGCACGGCATCCTCGCCGACGCCTACCGC…	GTGGCTCTCCATCGCCTGGCCTTTATCTTCCTGTGCCTGCCGCTCATGGCCAGCGCCGCCCCCTTCACCTCCCCCGGCGACCGCGACCTGATCCGCGACCGCCAGCAGCGCCTGCTGGACGAACAGCGCAAGCGCCTGGAGGAACTCCAGCAACTGCCCGGCAAGGGAGCGCCCGCCGCTGCGGATGCCTCCGGCGGCGACGAGCGCTGCTTCGAGATCCGCCGCATCGAGCTGGAAGGCGCCGGGCACCTCGGCGAAAGCGCGCGTCGCCAGTTGCTGGCGCCCTACCAGGGGCGCTGCCTGGGCGTCGGCCAGCTCAATGCGCTGCTCAAGGCCGTCACCGACCATTACCTGGATCGCGGCTACGTCACCACCCGTGCCTACCTGCCACAGCAGGAC…	ATGGGTGACCGGCACGACTACGTCGCTCTGGAGTGGGTGAAAGGCGAGATCGCCGAAACCCTGAAACAGGCGCGCCAGGCGCTGGAAGCGTTCGTCGAGAACCCGCAGGACCCGACCCGCATGCGGTTCTGCCTGACCTACGTGCACCA---GGTGCAGGGCACCCTGCAGATGGTCGAGTTCTACGGCGCGGCCCTGCTCGCCGAGGAAATGGAGCAGTTGGTCCAGGCCTTGCTGGACGGTCGCGTGCCGAACCAGGGCGAGGCCCTGGAAGTGCTGATGCAGGCGATCCTGCAACTGCCGGTCTACCTCGACCGGATCCAGACCGCCCGGCGCGACCTGCCGATGGTGGTCCTGCCGCTGCTCAACGACCTGCGCGCCGCGCGCGGCGAGAAGCTG…
2	ATGACCTTCGACGCCGCGTTCCAGCAGCTCGGCGAGCGGATGGCCGGCGGGGCCCTGGCGGAAACGGCGCTGGCGCCGTTCACCCATCTGCTGATCGACGAGTTCCAGGATGTCTCGCCGCAGATCGTCCTCTGGCTACAGGCGTTGCACCGTCGCCTGGCGA---CCCAGGGCACCGCGCCGAGCCTGATGGCCATCGGCGACGACTGGCAGTCGATCTACGGCTGGCGCGGCAGTTCGCCGGAGCTGTTCATCGACTTCGACCGGCACTTCCCCTCGCGTGGGCGGGGACGCAAGAGCGCGCTGCTGGTGCTGGAAACCAACTACCGCTCCGTCGAACCGATCATTCGCGACGGCGAGAAGGTGCTGGCCGGGGTGCGTTTCAAGCAGGACAAGACC…	ATGCACCTGTTGCGCACCCAACCCGGCGGCTTCGTTCCCGACGACGGCATCGCCCACCTGGCCCAGACTCCCGCCGAGCTGGTGATCCTCTGCAGCGGCGATTCGCACCTCGCATTGCTGGCCGAGGCCGCCCGTGCGCTGCCGGACGACTACCCGAGCCTGCGCCTGGCCAACCCCATGCAGTTGCAGAACCACGCCTCGGTGGACCTCTACGTCGAGGAAGTGCTGCGGCACGCGCGGGTGATCCTGCTTTCGCTGCACGGCGGCATCGGCTACTGGCGCTACGGCGTGGAGCAACTGGTGGCGCTGGCCGAGCGCGGCGCGCTGCTGATCCCGGTGCCCGGCGACGACCGCCCCGACCCGGAGCTGAGCGCCCTTGGCAACCTGCCGGCGGAGCAG…	ATGTTCGAACGCATCATCCAATTCGCCATCGAGCAACGCTGGCTGGTCCTGCTGGCGGTGCTGGGGATGGCCGGGGTCGGCATCGGCAGCTACCAGAAGCTGTCCATCGACGCGGTCCCGGACATCACCAACGTCCAGGTGCAGATCAATACCGCCGCCCCCGGCTACTCGCCGCTGGAAGTGGAGCAGCGGATCACCTACCCGGTGGAGACCGTCATGGCCGGCCTGCCGGGTTTGCAGGAAACCCGTTCGCTGTCGCGGCCGGGGATTTCCCAGGTGACGGTGATCTTCGAGGAGGGCACCGATATCTACTTCGCCCGCCAGCAGGTCAACGAACGCCTGAGCACGGCGCGCGAGCAACTGCCGGAAGACATCTCGCCGACCCTCGGGCCGATCTCC…	ATGTCCTTCAACCTTTCCGCCTGGGCGTTGCAGAATCGCCAGATCGTCCTGTACCTGATGATCCTGCTTGGCGCGGTTGGCGCGCTGTCCTACAGCAAGCTGGGGCAGAGCGAAGACCCGCCGTTCACCTTCAAGGCCATGGTGGTGCAGACCAACTGGCCGGGTGCCAGCGCCGAAGAGGTGGCCCGGCAGGTCACCGAGCGTATCGAGAAGAAGCTGATGGAAACCGGCGACTACGATCGCATCGTGTCCTTCTCCCGCCCCGGCGTCTCGCAGGTGACCTTCATGGCCCGCGAGGACATCCATTCCAGCGAGATCCCCGAACTCTGGTACCAGATCCGCAAGAAGATCAGCGACATTCGCGCCACCTTGCCGCAAAGCATCCAGGGCCCGTTCTTC…	ATGCGCACCGAGCAACCGAAAGTCATCCACCTCAAGGACTATCAGGCGCCGGACTACCTGATCGACGAGACCCACCTGAAGTTCGAACTGTTCGAAGACCACAGCCTGGTACACGCCGAGTTGAAGCTGCGGCGCAACCCCGAGCGCGGCGCCGGCCTGCCGCCGCTGTTGCTGCATGGCCAGCAACTGGAGCTGCTGGCGCTCGAACTGGACGGCCAGGCGCTCGGCGCGGACGACTACCAACTGGACGACGAGCAGCTCGGGGTGCAACCGCGGCAGGCCGAATTCGTCCTCAGGAGCACGGTGCGTATCCATCCGGAGAGCAACACCGCGCTGGAAGGCCTGTACAAGTCCGGCAAGATGTTCTGCACCCAGTGCGAGGCCGAGGGTTTCCGCAAG…	ATGACCGATAACCTGAACCTCGGCGCCATCGACCTGGGCACCGACGACGAATTCATCGCCCGCCATATCGGCCCGCGCGCCGCCGACACACAGGCCATGCTCCAGCGCTTGGGCTACGACTCGCTGGACACGCTGATCGGCAACGTGATCCCGGACAGCATCAAGGGCAGCAGCGTGCTCGACCTGCCGGCCGGCATGGGCGAGGCCGAGGCGCTGGCCAGCCTGAAGGCGATCGCCGCGCGCAATCGCGCGTTGCGTTCCTTCATCGGCCAGGGCTACTACAACTGCCACACCCCGGCACCGATCCTGCGCAACCTCCTGGAGAACCCGGCCTGGTACACCGCCTACACGCCGTACCAGCCGGAAATCTCCCAGGGCCGCCTGGAGGCGCTGCTGAAC…	GCAGGTTTCCCATGACGAGCTGGTCGCTCGCCTGTCCATGGTCGGCCTCGAGGTCGACGCCGACCTGCCGGTCGCCGGCGCCTTCAGCGGCGTGGTGGTCGGCGAGGTGCTCTCGACCGAACAGCATCCGGACGCCGACAAGCTACGCGTCTGCCAGGTCAGCAACGGCAGCGAGACCTTCCAGGTCGTCTGCGGTGCGCCCAACGTACGCGCGGGCCTGAAGATTCCCTTCGCCATGATCGGCGCCGAACTGCCGGGCGACTTCAAGATCAAGAAAGCCAAGCTGCGTGGCGTCGAGTCCTTCGGCATGCTCTGCTCGGCCAAGGAATTGCAGATCAGCGAAGAGAACGCCGGTCTGCTCGAGCTGCCGGCCGACGCGCCGGTCGGCCAGGACGTCCG…	ATGAGCGAGAACAACACGTACGACTCTTCCAGCATCAAGGTGCTGAAGGGGCTGGATGCCGTACGCAAGCGCCCCGGCATGTACATCGGCGACACCGACGATGGCACCGGTCTGCACCACATGGTGTTCGAGGTGGTGGATAACTCCATCGACGAAGCGCTGGCCGGTTACTGCAGCGAAATCAGCATCACCATCCATACGGATGAGTCGATCACTGTCCGCGACAATGGACGCGGTATTCCGGTGGATATCCACAAGGAAGAAGGGGTTTCTGCGGCGGAAGTGATCATGACCGTCCTCCACGCCGGCGGCAAGTTCGACGACAACACCTACAAGGTGTCCGGCGGCTTGCACGGTGTGGGCGTCTCGGTGGTGAACGCGCTGTCCCATGAACTACGC…	ATGCTGATCCTGCGCGGCGCTCCCGCCCTTTCCGCTTTCCGCCACGGCAAACTGCTCGAGCAACTGACCCAGCACGTACCTGCCGTTACCGGGCTGTACGCTGAGTTCGCGCATTTCGCCGACGTCACCGGCGCGCTCACCGCCGACGAGGAGCAGGTGCTGGCGCGGCTGCTGAAATACGGCCCGAGCGTGCCGGTGCAGGAGCCCAGCGGCCGGCTGTTCCTGGTGGTGCCGCGCTTCGGCACCATCTCGCCGTGGTCGAGCAAGGCCTCCGACATCGCCCGCAACTGCGGCCTGGCGAAGATCGACCGGCTGGAGCGCGGCATTGCCTACTATGTGCAGGGCGAACTGTCTGAGAGCGACGCCCAACAGGTCGCCGCCCGCCTGCATGACCGCATG…	ATGAGTGGCCGCTCCGCTGGTTTCGCCCTGCCCAGCCGCGACGAGTGGCGGCGCGCGCTGGCCGAGTGGGCGCGCAGCGACGGGGCGACCTGGATCTACGTGTTCAAGGTGCTCTGCGCGGCCTTCCTGACCCTCTGGCTGGCGATGCGCCTGGAATTGCCGCAGCCGAGCACGGCGACCATCACCGTGTTCATCGTCATGCAGCCGCAGAGCGGCCAGGTGTTCGCCAAGAGCTTCTACCGCATCCTCGGCACCCTGGTCGGCCTCAGCGTGATGGTCACCCTGATCGCCCTGTTCGCCCAGGAGCGAGTGCTGTTCCTGCTCAGCTCGGCGATCTGGATCGGCCTCTGCACCGCCGGGGCCGCCCGCTACCGTGACTTCCGCTCCTACGCCTGCGTG…	ATGAGCGAATCCCTCGATCTGAGCCTGGAAGGGGTCGAACGCCGGTCGTTGGCCGAGTTCACCGAGCAGGCCTATCTGAACTATTCCATGTACGTGATCATGGACCGCGCCCTGCCGCATATCGGCGACGGCCTGAAACCGGTGCAGCGACGCATCGTCTACGCCATGAGCGAACTGGGGCTGGATGCCGATTCCAAGCACAAGAAGTCGGCGCGCACCGTCGGCGACGTGCTCGGCAAGTTCCACCCGCACGGCGACTTGGCCTGCTACGAGGCCATGGTGCTGATGGCGCAGCCGTTCTCCTATCGCTATCCGCTGGTGGACGGCCAGGGCAACTGGGGGGCGCCGGACGATCCCAAGTCCTTCGCCGCCATGCGTTATACCGAGGCGCGCCTGTCG…	ATGTCTTCACGCAAGATCGGGCTCAACCTGGTGGTCATCGTCGCCCTGGCCGCCCTCTTCACCGGCATCTGGGCCCTGTACAACCGTCCGGTCAGCGTACCGGACTGGCCGGAACGCATCTCCGGCTTCTCCTTCTCGCCGTTCCGCCTCAACCAGAATCCGCAGAGCGGCCGCTACCCCAGCGCCGAACAGATGCGCGCCGACCTGGAACTGGTCGCCCGGCACACCCACAGCATCCGCACCTATTCGGTCCAGGGCGCGCTCGGCGACATCCCGGCGCTGGCCGAGGCGTTCGGCCTGCGCGTCAGCCTGGGCATCTGGCTCGGCCCGGACCTGGCCGGCAACGAGGCCGAGATCGCCCGCGCCATCCGCATCGCCAACGAGTCGCCGAGCGTGGTG…	ATGACCGCCATGCCCGAAGTACTTCGCGAAGATACGCTGAACATCCCCGACAGCCGTGGGCTGAATCTCTACACCTGCGATCCGGCCCTGGAGCGGCTGCTGGAGGTATACCTGCCGCCGGCGTTGCTCGCCGAATGGCGGCCGCTCCTCGAACGGCTCGGCGCCCGTGCCGGCGGCGAGCTGGACGTGCTGGCGCTGGCGGCGGACAAGAACCCGCCGGTGCTGGCGCCGCGCACCCGACGCGGCGAGGATTTGCAGAGCATTCGCAAGCATCCGGACTACGTCGCCCTCGAACGGGTGGCCTATGCCGAACTCGGCCTGGCTTCCATGAGCCATCGCCCGGACGGCCCGCCGCCGCTGGTGAAGTATGCGCTCACCCACCTGTTCGTACAGGCCGAG…	ATGTCCGAATTCTTCATCAAGCGGCCGAACTTCGCCTGGGTGGTGGCCCTGTTCATCTCCCTGGCCGGCCTGCTGGTCATTTCCAAATTGCCGGTAGCGCAGTACCCCAATGTCGCGCCGCCACAGATCACCATCACCGCCACCTATCCCGGCGCCTCGGCGAAAGTGCTGGTGGACTCCGTCACCAGCGTGCTCGAGGAGTCGCTGAACGGCGCCAAGGGCCTGCTCTACTTCGAGTCGACCAACAACTCCAACGGCAGCGCCGAGATCGTCGTCACCTTCGAGCCGGGCACCGATCCGGACCTGGCCCAGGTGGACGTGCAGAACCGCCTGAAGAAAGCCGAGGCGCGCATGCCGCAGGCGGTGCTGACCCAGGGCCTGCAGGTCGAGCAGACCAGC…	ATGAGCCAGCAGCAGATGCCCGTGGCCCTCGATCCGCTGGATTTCCCGTTGCACGGCAGCCGCCTGATCGAGGCCAGCGCCGGTACCGGCAAGACGTTCACCATCGCCCTGCTATACGTACGCCTGGTCCTCGACCATGGCGGCGAGAACGCTTTCGGCCGGCCGCTGAGCCCGCCGGAAATCCTCGTGGTGACCTTCACCGATGCGGCGACCCAGGAACTCCGCGAGCGTATCCGCAGCCGCCTGGGCGAAGCGGCGCGTTGTTTCGCCGAGCCGCAGGAGCGCCACGACGGCCTGCTGGTCGCGTTGCGCCAGCAGTATCCCGCCGAGCGCTGGCCGGGCTGCGCGCGCCTGCTGCGCCTGGCCGCGGAGTGGATGGACGAGGCCGCGGTATCGACC…	ATGAGGCGCGCCAGCCTGCATATGTTGCTCTGCCAGTTCGCCATGGCCCTGGGCCTGCTCCTGAGCCTGGGCAGCGAGGCCTGGGCCGCCAGGCCGACTCCGCAGGCGGCCGTCGACCTGGAAGCGCCGGCCGCCCTGGCCGAGGACGCCAGCCTCGACCAGCTCAACGCGCAACTCGACCTGATCCGCCAGCGCGTCACCGCCGACGCCAGCGACGACCTCCTCGCCGAGTTGCGCCAGAGCGCGCTGCAAGTCCAGCGCCAGGCCGACGCCCTGCTCGCGCTGCGGGTGGCCGACATCGAGCGGCTCGACGATCAGTTGAAAGTGATCGGCCCGCCGCAGCCCGACGAGGCGGAAAGCCTCGCCGCCCAGCGCCAGGCCCTGACCCGGCAGAAGAAC…	CTGCTGTTCGCCGCGGTGGTCATCGGCTTCCCCCAGCGCGCCGGCGAATGGCTGCTGGCCGCACAGACCTGGGCCTCGCAGACCGTCGGTTGGTACTACCTGCTGGCGATGACGCTGTACCTGATCTTCGTGGTGGTCACCGCGCTTTCCGGCTACGGCAAGATCAAGCTCGGTGCCGACCACGACGAGCCGGAATTCAGCTACCTGTCCTGGGCCGGCATGCTGTTCGCCGCCGGCATCAGCATCACCCTGTTCTTCTTCTGCGTATCCGAGCCGTTGACCCACTTCCTCCAGCCGCCGCAAGGCGAGGCCGGAACCCAGGAAGCCGCGCGGCAGGCCATGGAACTGCTGTTCCTGCACTGGGGCCTGCACGGCTGGGGCGTGTTCGCCCTGGTGGCG…	ATGGTCCAGGGCACCACCTCGGACGCCGGCAAGAGCACCCTGGTGACCGCGCTGTGCCGCTGGCTGGCCCGGCGCGGCGTCGCGGTGGTGCCGTTCAAGCCGCAGAACATGGCGCTGAACAGCGCGGTCACCGCCGACGGCGGCGAGATCGGCCGCGCCCAGGCGGTCCAGGCCCAGGCCTGTCGGCTGGCGCCGCACACCGACATGAACCCGGTGCTGCTCAAGCCGAACACCGACATCGGCGCCCAGGTGATCATCCATGGCCGCGCGGTGACCAGCATGGACGCCGCCGCCTACCACGACTACAAGCGCGTGGCGATGGAAGCGGTGCTGGCTTCCCATGGGCGGCTCGCCGCCGCCTACCGGGTGGTGATGGTGGAGGGCGCCGGCTCGCCGGCG…	ATGGCCAGCCTGTTCCTCGGCCGCAAGGAAATCGACGACGACCTGCTCGACGACATCGAGACGCGCCTGCTGACCGCCGACGTCGGCGTCGAGGCCACCACCCTGATCGTGCAGAACCTGACCAAGCGCGTGGCGCGCAAGGAGCTGGCCGACAGCGGCGCGCTGTACAAGGCGCTGCAGGAAGAGCTGGCCAGCCTGCTGCGCCCGGTGGAGCAGCCGTTGCAGGTCGACGTCGCGCGCGAGCCCTATGTGATCCTGGTGGTCGGGGTGAACGGCGTGGGCAAGACCACCACCATCGGCAAGCTGGCGAAGAAGCTGCAACTCGAGGGCAAGAAGGTCATGCTGGCCGCCGGCGACACCTTCCGCGCCGCCGCCGTGGAGCAGTTGCAGGTCTGGGGC…	TTGCGCATCGAGAACTTCGCACCCATCGACAGCCAGGGTTTCCGTTTCCTGCTCCGGCCAGGTGACGAACCTCTGCTCGCGCTCATCGATCGCGCCCTGCCGCATATTAGCGGGCGCTACGGCGACGAACTGTTGCGCAGCTGGAGCGCCGGGAGGCGCCTGCGCTTCGACGATCCCCGGGTGACGCTGTCGCCGGCGGAACAGCGTTGGCTCTCCGCGCACCCGGTCGTGCCGGTGGTGATCAACCATTCCCTTGGCGCGCTCGGGCAACTGGATAACGAGGGGAGGCTGAGTGGTATCGGGCGTGACTATCTGGACCTGATCGGCAAGCGCAGTGGCCTGCAGTTTTCCTTCACTGGAGCACGCAACTTCGTCGAGACGAAAAGCCGACTGGATGCG…	CGAGCCACCGCCCGCAGACGACTACTACGAAGTCGACATGGATACCCTGGCCTACCTGGATGCCGCGCCCGAGCCTGACGTGGTCGTGGTGGAGGAGCCGCTGCCGGCGGCGAAGCCGGCCACCGGCCTGGCCGCGGAGTGGCTGGAGCTGTTCCCGCGGCTCGGCCTCGGCGGCCTGACCGCCAGCATCGGTGCCAACTGTACGCTGGTAGCTGCCGACGGCGACCACTGGCATCTGCATCTCGATCCGGGCCAGAGCGCGCTGTTCAACGCCACCCAGCAGCGGCGGCTGAACGATGCGCTGAACCAGCACCTGGGGCGCACCCTCAAACTGGAGGTGACCCTGCAGAAGCCTGAGCAGGAGACCCCGGCCCAGGCAGCGGCACGCCGGCGTGCCGA…	ATGTCGCAGACGCCGTCCCTCGCCCAGCTCCAGCCCGCCGATGCCTTCCTGCGCCGCCATCTCGGCCCCGATCCTGCGGAACAGCAGGCCATGCTGGCCTTCCTCGGAGTTTCCACTCGCGCCGAACTGATCGTGCAGACGGTGCCGCCGGCGATCCGCCTCAACCGGCCGCTGGAACTGCCCGCCGCGCTCGACGAACAGGCCGCCCTGGCGCGCCTGCGCGGCTACGCCGGGCTCAACCAGCGCTGGACCAGCCTGATCGGCATGGGCTACTACGGCACCGTGACGCCGTCGGTGATCCTCCGCAACGTGCTGGAGAATCCCGGCTGGTACACCGCCTATACGCCCTACCAGCCGGAAATCGCCCAGGGCCGCCTGGAAGCGCTGCTGAATTTCCAG…	GTGATTCTCGCCGACGAGCAGGAAGAGTTCGGCGGCAGCCTGCTGGACACCCGCGAGACCCTCGACGGCAAGCCCGCCGCCGAGTGGGTCGCGGACGCCGTGGCCGAGCTGCAAGGCCTGCCGGAAGTCATCCTGCTACCGCGCTCCACGGTCAACGGCTACCACGACCACAACTTCCTCACCATCCACGAGCGGCGCACCGACCACCTCGGCGAGGTCGCCCCGCTCGGCCAGGTCCGCCAGCGCGTGCACCGCGTGCGCGCCAAGCGCGTGGTACTGGCCGCCGGCGCCCATGAGCGGCCGCTGGTCTACGGCAACAACGACCTGCCCGGCAACATGCTCGCCGGCGCGGTTTCCACCTATGTACGGCGCTACGGCGTGGCACCGGGCAAGAAACTG…	GTGCGCAGCTATCTCGAATGGCTGCTGGACAACCACTTCACCTTCCTCGGCTACGAGGAATTCAGCGTCGCCGACGAGGCCGACGGCGGGCGCATGGTCTACGACGAGAAATCCTTCCTCGGCCTGACCCGTCTGCTGCGTGCCGGCCTGAGCAAGGATGACCTGCACATCGAGGACTATGCCGTCGCCTACCTGCGCGAACCGGTCCTGCTGTCCTTCGCCAAGGCTGCCCATCCGAGCCGCGTGCACCGCCCGGCCTACCCGGACTACGTGTCGATCCGCGAGCTGGACGGCAAGGGCCGGGTGATCCGCGAGTGCCGCTTCATGGGCCTGTTCACCTCCTCGGTGTACAACGAGAGCGTCAACGACATTCCCTTCATCCGCGGCAAGGTCGCCGAA…	GTGTACGGCGAATATTCTCGGGAAAGCATTACCTGCCTGCTCGCCATACTGTTATCCGGCCATCACTACTTATATATAGACCTGAAACAACCGGCGGCCTGGAATGCAGAGTTGTGCCGGCAGGTCGACTGCCGCCTGATCCTCGACTGCTCGACCACGCCGACGCCCGCCAACGGTCTTCCCTGCGTCCCGGTCAGGCACCTGCCTGCCGCTCCAGCCTCGGTCGCCCGGCCATGCTTCGCGGCGGACCAGATCGCCTACATCAACTTCTCCTCGGGCACCACCGGCCGCCCGAAAGCCATCGCCTGCACCCACGCCGGCATTACCCGCCTGTGCCTGGGCCAGTCGTTCCTCGCGTTCGCTCCGCAGATGCGCTTCCTGGTGAACTCGCCGCTGTCC…	CTGCTGGAAGAAGGTGCGGACGAGGTATTCGAGGAAATCCTCGCCGCCGTTACGTCCTACTTCCAGACGCCCATCGCGCTCATTTCCATCCTCGACCATCAGCGCCAGTGGTTTCGCGCGAGCATCGGCCTCGATATCCGGCAGACGCCGCGACGGGATTCGTTCTGCGCCTATGCGATCCTGGGCAAGGGAGTCTTCGAGGTGGCCGACGCCACTCTCGACCCGCGCTTCCGGGACAATCCCTATGTGCAAGGCGAACCGCGCATCCGCTTCTACGCCGGGGCTCCGCTGGCCACCGCGGAAGGTCTCAACCTCGGCAGCCTCTGCGTCATCGACCGGGAACCACGCGGGCCGCTGGCCGAGCGGGACGTCGCCATGCTCGAGCACTTCGCCCGGCTG…	ATGTCCCTGAGTGTCTTCGATCTGTTCAAGATCGGCATCGGGCCGTCCAGCTCCCACACCGTGGGGCCGATGCGTGCCGCTGCGCGCTTCGCCGAGGGGCTGAGGCGCGAGGGGTTGCTGGAGGCCACTGCCAGCGTCAAGGTCGAGCTGTACGGCTCGCTCGGCGCCACCGGCAAGGGCCACGGCAGCGACAAGGCGGTACTGCTCGGCCTGGAGGGCGAGCAGCCGGACACGGTGGATACCGCCGCGATTCCCGCCCGGCTCGATGCCATCCGTTCCAGCGGCGAGCTGCGCCTGCTCGGCGAGCGGCCGATCCGCTTCGTCGAGAAGGAACACCTGGCGCTGATCCGCAAGCCGCTGGCCTACCATCCCAACGGCATGATCTTCCGTGCCTTCGAC…	ATGAACAGAGTTTTCCTGACCCCGGCAGCCGTGGCGCTGTGCGGCGCGTCTTCCCTGAGCCTGGCCGAACCGGTCAGCCTTGTCGACCAGGTGGTGACCGCCACCCGTACCGCCCAGACCGCTTCCCAGAGCCTGGCGGCGGTGAGCGTCATCGACCGCGAGGATATCGAGCGCAGCCAGGCGCGCAGCGTGCCGGAGCTGTTGCGCCAGGTACCCGGCGTGTCGCTGGCGAACAACGGCGGTTTCGGCAAGAACACCACGCTGTTCCTGCGCGGCACCGAGTCCGACCATGTGCTGGTGCTGATCGACGGCATCAAGGTCGGCTCGGCCAGCGCCGGCCTCACCGCGTTCCAGGACTTGCCGGTGGAGCTGATCGAGCGCATCGAGGTGGTCCGCGGG…	GTGCGGGTGCTCAACTGGAGCTGGGGCATCCACCGCGTCGGCGCTCGCGACGTCGATGGCGACGAGGTGGATTCGCTGGTGCGCTCGGGGATTGCCATGAGCGGCTACGAGGAGTTGCTCGAGGAGTTCTTCCTCTGGCTGCGCAAGGAGCATCCGGACGTGCTGGTGGTCAACTCCGCCGGCAACGGCTCGTCCTACTCCGGTACCGACGAATACCGCCTGCCGTCCTCCTTCGTCACCGAGCAGTTGCTGGTGGTGGGCGGCCACCAGCGCAGCGAGCGCCAAGGCCTGGCGGTGGACGACCCGGCCTACGCGGTCAAGCGCAGCACCTCGAACGTCGACATGCGGGTGGATGTCACCGCCGCCGCCTGTACCCATGCCTCGACCCTGGAGCGGGAC…	TTGCAGGCAGCTTGCGCGTTCGGCCCGCCCGGGCGGCTATTCCGCGCCTGCGACGAGCAAGGACGCGAGGCGTTGCTGCTGCTCGCGGCGGTCGATGCCGACGAAGCGTTCTGGCAGCGCGAATGGGCATTGCGGCGCTGCCGTGCGGAGAGCCTGCCGCGAGTATTGTCGTCGCCCCGGTTGCGTCGTCATGCCTTCCAGTTGTTCGCTCCGCCGCGCTGGCCGATGCGCAGCCTGCTGGATTGGGCGCCAGCGCACCTGCCGCTGGAACCGCAATGCGCGCTGGTCCTCCTGGAGCAACTTATCGATGCGGTTCGCGCCTTGCAGCGGCGCGGCGTACAGGGCTTGTGGCTGGCGCCGCGGCAGATCCTGCTGGACGAGGGCGGGCGCCTGCTGTTC…	ATGTTCAACCCGGCCAACCAGACCCACTTCAGCCTCAGCCTCGACGGCCTCCGCCATGACCTGCAGGTCCTCGCCTTCAACGGCCACGAAGGCATCAGTCGCCCCTACCGTTTCGAACTCGAACTGGTCGGAGAGCGTGCCGGCCTCGACCTCGAAGCGTTCCTGCACCGGCCCGCCTTCCTCGCCTTCACCCCGCAGGGCCAGGGTGTCCACGGCCTGGTCTACGGCGCCGCCCAGGCCGACGCGGGCAAGCGCCTGACCCGCTATCGCCTCACCCTCGTGCCGCAACTGGCCTACCTCGCGCAGCGCAGCAACCAGCGGATCTTCCAGCACCTCACGGTGCCGCAGATCGTCGCCCTGATCCTCGAGGAGCACGGCATCCTCGCCGACGCCTACCGC…	GTGGCTCTCCATCGCCTGGCCTTTATCTTCCTGTGCCTGCCGCTCATGGCCAGCGCCGCCCCCTTCACCTCCCCCGGCGACCGCGACCTGATCCGCGACCGCCAGCAGCGCCTGCTGGACGAACAGCGCAAGCGCCTGGAGGAACTCCAGCAACTGCCCGGCAAGGGAGCGCCCGCCGCTGCGGATGCCTCCGGCGACGACGAGCGCTGCTTCGAGATCCGCCGCATCGAGCTGGAGGGCGCCGGGCACCTCGGCGAAAGCGCGCGTCGCCAACTGCTGGCGCCCTACCAGGGGCGCTGCCTGGGCGTCGGCCAGCTCAATGCGCTGCTCAAGGCCGTCACCGACCATTACCTGGATCGCGGCTACGTCACCACCCGCGCCTACCTGCCACAGCAGGAC…	ATGGGTGACCGGCACGACTACGTCGCTCTGGAATGGGTGAAAGGCGAGATCGCCGAAACCCTGAAACAGGCGCGCCAGGCGCTGGAAGCGTTCGTCGAGAACCCGCAGGACCCGACCCGCATGCGGTTCTGCCTGACCTACGTGCACCA---GGTGCAGGGCACCCTGCAGATGGTCGAGTTCTACGGCGCGGCCCTGCTCGCCGAGGAAATGGAGCAGTTGGTCCAGGCCTTGCTGGACGGTCGCGTGCCGAACCAGAGCGAGGCCCTGGAAGTGCTGATGCAGGCGATCCTGCAACTGCCGGTCTACCTCGACCGGATCCAGACCGCCCGGCGCGACCTGCCGATGGTGGTCCTGCCGCTGCTCAACGACCTGCGCGCCGCGCGCGGCGAGAAGCTG…
3	ATGACCTTCGACGCCGCGTTCCAGCAGCTCGGCGAGCGGATGGCCGGCGGGGCCCTGGCGGAAACGGCGCTGGCGCCGTTCACCCATCTGCTGATCGACGAGTTCCAGGATGTCTCGCCGCAGATCGTCCTCTGGCTACAGGCGTTGCACCGTCGCCTGGCGA---CCCAGGGCACCGCGCCGAGCCTGATGGCCATCGGCGACGACTGGCAGTCGATCTACGGCTGGCGCGGCAGTTCGCCGGAGCTGTTCATCGACTTCGACCGGCACTTCCCCTCGCGTGGGCGGGGACGCAAGAGCGCGCTGCTGGTGCTGGAAACCAACTACCGCTCCGTCGAACCGATCATTCGCGACGGCGAGAAGGTGCTGGCCGGGGTGCGTTTCAAGCAGGACAAGACC…	ATGCACCTGTTGCGCACCCAACCCGGCGGCTTCGTTCCCGACGACGGCATCGCCCACCTGGCCCAGACTCCCGCCGAGCTGGTGATCCTCTGCAGCGGCGATTCGCACCTCGCATTGCTGGCCGAGGCCGCCCGTGCGCTGCCGGACGACTACCCGAGCCTGCGCCTGGCCAACCCCATGCAGTTGCAGAACCACGCCTCGGTGGACCTCTACGTCGAGGAAGTGCTGCGGCACGCGCGGGTGATCCTGCTTTCGCTGCACGGCGGCATCGGCTACTGGCGCTACGGCGTGGAGCAACTGGTGGCGCTGGCCGAGCGCGGCGCGCTGCTGATCCCGGTGCCCGGCGACGACCGCCCCGACCCGGAGCTGAGCGCCCTTGGCAACCTGCCGGCGGAGCAG…	ATGTTCGAACGCATCATCCAATTCGCCATCGAGCAACGCTGGCTGGTCCTGCTGGCGGTGCTGGGGATGGCCGGGGTCGGCATTGGCAGCTACCAGAAGCTGTCCATCGACGCGGTCCCGGACATCACCAACGTCCAGGTGCAGATCAATACCGCCGCCCCCGGCTACTCGCCGCTGGAAGTGGAGCAGCGGATCACCTACCCGGTGGAGACCGTCATGGCCGGCCTGCCGGGTTTGCAGGAAACCCGTTCGCTGTCGCGGCCGGGGATTTCCCAGGTGACGGTGATCTTCGAGGAAGGCACCGACATCTACTTCGCCCGCCAGCAGGTCAACGAACGCCTGAGCACGGCGCGCGAGCAACTGCCGGAAGACATCTCGCCGACCCTCGGGCCGATCTCC…	ATGTCCTTCAACCTTTCCGCCTGGGCGTTGCAGAATCGCCAGATCGTCCTGTACCTGATGATCCTGCTTGGCGCGGTCGGCGCGCTGTCCTACAGCAAGCTGGGGCAGAGCGAAGACCCGCCGTTCACCTTCAAGGCCATGGTGGTGCAGACCAACTGGCCGGGCGCCAGCGCCGAAGAGGTGGCCCGGCAGGTCACCGAGCGTATCGAGAAGAAGCTGATGGAAACCGGCGACTACGATCGCATCGTGTCCTTCTCCCGCCCCGGCGTCTCGCAGGTGACCTTCATGGCCCGCGAGGACATCCATTCCAGCGAGATCCCCGAACTCTGGTACCAGATCCGCAAGAAGATCAGCGACATTCGCGCCACCTTGCCGCAAAGCATCCAGGGCCCGTTCTTC…	ATGCGCACCGAGCAACCGAAAGTCATCCACCTCAAGGACTATCAGGCGCCGGACTACCTGATCGACGAGACCCACCTGAAGTTCGAACTGTTCGAAGACCACAGCCTGGTGCACGCCGAGCTGAAGCTGCGGCGCAACCCCGAGCGCGGCGCCGGCCTGCCGCCGCTGTTGCTGCATGGTCAGCAACTGGAGCTGCTGGCGCTCGAACTGGACGGCCAGGCGCTCGGCGCGGACGACTACCAACTGGACGACGAGCAGCTCGGGGTGCAACCGCGGCAGGCCGAGTTCGTCCTCAGGAGCACGGTGCGTATCCATCCGGAGAGCAACACCGCGCTGGAAGGCCTGTACAAGTCCGGCAAGATGTTCTGCACCCAGTGCGAGGCCGAGGGTTTCCGCAAG…	ATGACCGATAACCTGAACCTCGGCGCCATCGACCTGGGCACCGACGACGAATTCATCGCCCGCCATATCGGCCCGCGTGCCGCCGACACCCAGGCCATGCTCCAGCGCCTGGGCTACGACTCGCTGGACGCGCTGATCGGCAACGTGATCCCCGACAGCATCAAGGGCAGCAGCGTGCTCGACCTGCCGGCCGGCATGGGCGAGGCCGAGGCGCTGGCCAGCCTGAAGGCGATCGCCGCGCGCAATCGCGCGTTGCGTTCCTTCATCGGCCAGGGCTACTACAACTGCCACACCCCGGCACCGATCCTGCGCAACCTCCTGGAGAACCCGGCCTGGTACACCGCCTACACGCCGTACCAGCCGGAAATCTCCCAGGGCCGCCTGGAGGCGCTGCTGAAC…	GCAGGTTTCCCATGACGAGCTGGTCGCTCGCCTGTCCATGGTCGGCCTCGAGGTTGACGCCGACCTGCCGGTCGCCGGCGCCTTCAGCGGCGTGGTGGTCGGCGAGGTGCTCTCGACCGAACAGCATCCGGACGCCGACAAGCTGCGCGTCTGCCAGGTCAGCAACGGCAGCGAGACCTTCCAGGTCGTCTGCGGTGCGCCCAACGTGCGCGCGGGCCTGAAGATTCCGTTCGCCATGATCGGCGCCGAACTGCCGGACGACTTCAAGATCAAGAAAGCCAAGCTGCGCGGCGTCGAGTCCTTCGGCATGCTCTGCTCGGCCAAGGAATTGCAGATCAGCGAAGAGAACGCCGGTCTGCTCGAGCTGCCGGCTGACGCGCCGGTCGGCCAGGACGTCCG…	ATGAGCGAGAACAACACGTACGACTCTTCCAGCATCAAGGTGCTGAAGGGGCTGGATGCCGTACGCAAGCGCCCCGGCATGTACATCGGCGACACCGACGATGGCACCGGTCTGCACCACATGGTGTTCGAGGTGGTGGATAACTCCATCGACGAAGCGCTGGCCGGTTACTGCAGCGAAATCAGCATCACCATCCATACGGATGAGTCGATCACTGTCCGCGACAATGGACGCGGTATTCCGGTGGATATCCACAAGGAAGAAGGGGTTTCTGCGGCGGAAGTGATCATGACCGTCCTCCACGCCGGCGGCAAGTTCGACGACAACACCTACAAGGTGTCCGGCGGCTTGCACGGTGTGGGCGTCTCGGTGGTGAACGCGCTGTCCCATGAACTACGC…	ATGCTGATCCTGCGCGGCGCTCCCGCCCTTTCCGCTTTCCGCCACGGCAAACTGCTCGAGCAACTGACCCAGCACGTACCTGCCGTTACCGGGCTGTACGCTGAGTTCGCGCATTTCGCCGACGTCACCGGCGCGCTCACCGCCGACGAGGAGCAGGTGCTGGCGCGGCTGCTGAAATACGGCCCGAGCGTGCCGGTGCAGGAGCCCAGCGGCCGGCTGTTCCTGGTGGTCCCGCGCTTCGGCACCATCTCGCCGTGGTCGAGCAAGGCCTCCGACATCGCCCGCAACTGCGGCCTGGCGAAGATCGACCGGCTGGAGCGCGGCATTGCCTACTATGTGCAGGGCGAACTGTCCGAGAGCGATGCCCAGCAGGTCGCCGCCCGCCTGCATGACCGCATG…	ATGAGTGGCCGCTCCGCTGGTTTCGCCCTGCCCAGCCGCGACGAGTGGCGGCGCGCGCTGGCCGAGTGGGCGCGCAGCGACGGGGCGACCTGGATCTACGTGTTCAAGGTGCTCTGCGCGGCCTTCCTGACCCTCTGGCTGGCGATGCGCCTGGAGTTGCCGCAACCGAGCACGGCGACCATCACCGTGTTCATCGTCATGCAGCCGCAGAGCGGCCAGGTGTTCGCCAAGAGCTTCTACCGCATCCTCGGCACCCTGGTCGGCCTCAGCGTGATGGTCACCCTGATCGCCCTGTTCGCCCAGGAGCGGGTGCTGTTCCTGCTCAGCTCGGCGATCTGGATCGGTCTCTGCACCGCCGGGGCCGCCCGCTACCGTGACTTCCGCTCCTACGCCTGCGTG…	ATGAGCGAATCCCTCGATCTGAGCCTGGAAGGGGTCGAACGCCGGTCGTTGGCCGAGTTCACCGAGCAGGCCTATCTGAACTATTCCATGTACGTGATCATGGACCGCGCCCTGCCGCATATCGGCGACGGCCTGAAACCGGTGCAGCGACGCATCGTCTACGCCATGAGCGAACTGGGGCTGGATGCCGATTCCAAGCACAAGAAGTCGGCGCGCACCGTCGGCGACGTGCTCGGCAAGTTCCACCCGCACGGCGACTCGGCCTGCTACGAGGCCATGGTGCTGATGGCGCAGCCGTTCTCCTATCGCTATCCGCTGGTGGACGGCCAGGGCAACTGGGGGGCTCCGGACGATCCCAAGTCCTTCGCCGCCATGCGTTATACCGAGGCGCGCCTGTCG…	ATGTCTTCACGCAAGATCGGGCTCAACCTGGTGGTCATCGTCGCCCTGGCCGCCCTCTTCACCGGCATCTGGGCCCTGTACAACCGTCCGGTCAGCGTACCGGACTGGCCGGAACGCATCTCCGGCTTCTCCTTCTCGCCGTTCCGCCTCAACCAGAACCCGCAGAGCGGCCGCTACCCCAGCGCCGAACAGATGCGCACCGACCTGGAACTGGTCGCCCGGCACACCCACAGCATCCGCACCTATTCGGTCCAGGGCGCGCTCGGCGACATCCCGGCGCTGGCCGAGGCGTTCGGCCTGCGCGTCAGCCTGGGCATCTGGCTCGGCCCGGACCTGGCCAGCAACGAGGCCGAGATCGCCCGCGCCATCCGCATCGCCAACGAGTCGCCGAGCGTGGTG…	ATGACCGCCATGCCCGAAGTACCTCGCGAAGATACGCTGAACATCCCCGACAGCCGTGGGCTGAATCTCTACACCTGCGATCCGGCCCTGGAGCGGCTGCTGGAGGTATACCTGCCGCCGGCGTTGCTCGCCGAATGGCGGCCGCTCCTCGAACGGCTCGGCGCCCGTGCCGGCGGCGAGCTGGACGTGCTGGCGCTGGCGGCGGACAAGAACCCGCCGGTGCTGGCGCCGCGCACCCGCCGCGGCGAGGATTTGCAGAGCATTCGCAAGCATCCGGACTACGTCGCCCTCGAACGGGTGGCCTATGCCGAACTCGGCCTGGCTTCCATGAGCCATCGCCCGGACGGCCCACCGCCGCTGGTCAAGTATGCGCTCACCCACCTGTTCGTACAGGCCGAG…	ATGTCCGAATTCTTCATCAAGCGGCCGAACTTCGCCTGGGTGGTGGCCCTGTTCATCTCCCTGGCCGGCCTGCTGGTCATTTCCAAATTGCCGGTAGCGCAGTACCCCAATGTCGCGCCGCCACAGATCACCATCACCGCCACCTATCCCGGCGCCTCGGCGAAGGTGCTGGTGGACTCCGTCACCAGTGTGCTCGAGGAGTCGCTGAACGGCGCCAAGGGCCTGCTCTACTTCGAGTCGACCAACAACTCCAACGGCAGCGCCGAGATCGTCGTCACCTTCGAGCCGGGCACCGATCCGGACCTGGCCCAGGTGGACGTGCAGAACCGCCTGAAGAAAGCCGAGGCGCGCATGCCGCAGGCGGTGCTGACCCAGGGCCTGCAGGTCGAGCAGACCAGC…	ATGAGCCAGCAGCAGATGCCCGTGGCCCTCGATCCGCTGGACTTCCCGTTGCACGGCAGCCGCCTGATCGAGGCCAGCGCCGGTACCGGCAAGACGTTCACCATCGCCCTGCTATACGTACGCCTGGTCCTCGACCATGGCGGCGAGAGCGCTTTCGGCCGGCCGCTGAGCCCGCCGGAAATCCTCGTGGTGACCTTCACCGATGCGGCGACCCAGGAACTCCGCGAGCGTATCCGCAGCCGCCTGGGCGAAGCGGCGCGTTGTTTCGCCGAGCCGCAGGAGCGCCACGACGGCCTGCTGGTCGCGTTGCGTCAACAGTATCCCGCCGAGCGCTGGCCGGGCTGCGCGCGCCTGCTGCGCCTGGCCGCGGAGTGGATGGACGAGGCCGCGGTATCGACC…	ATGAGGCGCGCCAGCCTGCATATGTTGCTCTGCCAGTTCGCCATGGCCCTGGGCCTGCTCCTGAGCCTGGGCAGCGAGGCCTGGGCCGCCAGGCCGGCTCCGCAGGCGGCCGTCGACCTGGAAGCGCCGGCCGCCCTGGCCGAGGACGCCAGCCTCGACCAGCTCAACGCGCAACTCGACCTGATCCGCCAGCGCGTTACCGCCGACGCCAGCGACGACCTCCTCGCCGAGTTGCGCCAGAGCGCGCTGCAAGTCCAGCGTCAGGCCGACGCCCTGCTCGCGCTACGGGTGGCCGACATCGAGCGGCTCGACGATCAGTTGAAAGTGATCGGCCCGCCGCAGCCCGACGAGGCGGAAAGCCTCGCCGCCCAGCGCCAGGCCCTGACCCGGCAGAAGAAC…	CTGCTGTTCGCCGCAGTGGTCATCGGCTTCCCCCAGCGCGCCGGCGAATGGCTGCTGGCCGCGCAGACCTGGGCCTCGCAGACCGTCGGCTGGTACTACCTGCTGGCGATGACGCTGTACCTGATCTTCGTGGTGGTCACCGCGCTTTCCGGCTACGGCAAGATCAAGCTCGGTGCCGACCACGACGAGCCGGAATTCAGCTACCTGTCCTGGGCCGGCATGCTGTTCGCCGCCGGCATCAGCATCACCCTGTTCTTCTTCTGCGTATCCGAACCGCTGACCCACTTCCTCCAGCCGCCGCAAGGCGAGGCCGGTACCCAGGAAGCCGCGCGGCAGGCCATGGAACTGCTGTTCCTGCACTGGGGCCTGCACGGCTGGGGCGTATTCGCCCTGGTGGCG…	ATGGTCCAGGGCACCACCTCGGACGCCGGCAAGAGCACCCTGGTGACCGCGCTGTGCCGCTGGCTGGCCCGGCGCGGCGTCGCGGTGGTGCCGTTCAAGCCGCAGAACATGGCGCTGAACAGCGCGGTCACCGCCGACGGCGGCGAGATCGGCCGCGCCCAGGCGGTCCAGGCCCAGGCCTGCCGGCTGGCGCCGCACACCGACATGAACCCGGTGCTGCTCAAGCCGAACACCGACATCGGCGCCCAGGTGATCATCCATGGCCGCGCGGTGACCAGCATGGACGCCGCCGCCTACCACGACTACAAGCGCGTGGCGATGGAAGCGGTGCTGGCTTCCCATGGGCGGCTCGCCGCCGCCTACCGGGTGGTGATGGTGGAGGGCGCCGGCTCGCCGGCG…	ATGGCCAGCCTGTTCCTCGGCCGCAAGGAAATCGACGACGACCTGCTCGACGACATCGAGACGCGCCTGCTGACCGCCGACGTCGGCGTCGAGGCCACCACCCTGATCGTGCAGAACCTGACCAAGCGCGTGGCGCGCAAGGAGCTGGCCGACAGCGGCGCGCTGTACAAGGCGCTGCAGGAAGAGCTGGCCAGCCTGCTGCGCCCGGTGGAGCAGCCGTTGCAGGTCGACGTCGCGCGCGAGCCCTATGTGATCCTGGTGGTCGGGGTGAACGGCGTGGGCAAGACCACCACCATCGGCAAGCTGGCGAAGAAGCTGCAACTCGAGGGCAAGAAGGTCATGCTGGCCGCCGGCGACACCTTCCGCGCCGCCGCCGTGGAGCAGTTGCAGGTCTGGGGC…	TTGCGTATCGAGAACTTCGCGCCCATCGACAGCCAGGGTTTCCGTTTCCTGCTCCGGCCGGGGGATGAGCCTCTGCTCGCGGTCCTCGATCGAGCCCTGCCGCGTATCAATGGGCGCTACGGCGACGAACTGTTGCGCAGTTGGAGCGCCGGGCGGCGCCTGCGTTTCGACGAGCCCAGGGTGACGCTTGCGCCGGCGGAACAGCGTTGGCTCTCCACGCATCCGGTCGTGCCGGTGGTGATCAACCATTCCCTTGGCGCGCTCGGGCAACTGGATAGCGAGGGGCGGCTGAGCGGTATCGGGCGTGACTATCTGGACCTGATCGGCAAGCGCAGCGGCCTGCAGTTTTCCTTCAGCGGAGCCCGAAACTTCGTCGAGGCGAAACGTCGACTGGATGCG…	TGAGCCACCGCCCGCGGACGACTACTACGAAGTCGACATGGATACCCTGGCCTACCTGGATGCCGCGCCCGAGCCTGACGTGGTCGTGGTGGAGGAGCCGCTGCCGGCGGCGAAGCCGGCCACCGGCCTGGCCGCGGAGTGGCTGGAGCTGTTCCCGCGGCTCGGCCTCGGCGGCCTGACCGCCAGCATCGCTGCCAACTGTACGCTGGTAGCTGCCGACGGCGACCACTGGCATCTGCATCTCGATCCGGGCCAGAGCGCGCTGTTCAACGCCACCCAGCAGCGGCGGCTGAACGATGCGCTGAACCAGCACCTGGGGCGCACCCTCAAACTGGAGGTGACCCTGCAGAAGCCTGAGCAGGAGACCCCGGCCCAGGCAGCGGCACGCCGGCGTGCCGA…	ATGTCGCAGACGCCGTCCCTCGCCCAGCTCCAGCCCGCCGATGCCTTCCTGCGCCGCCACCTCGGCCCCGATCCGGCGGAACAGCAGGCCATGCTGGATTTCCTCGGAGTTTCCACTCGCGCCGAACTGATCGTGCAGACGGTGCCGCCGGCGATCCGCCTCAACCGGCCGCTGGAACTGCCCGCCGCGCTCGACGAACAGGCCGCCCTGGCGCGCCTGCGCGGCTACGCCGGGCTCAACCAGCGCTGGACCAGCCTGATCGGCATGGGCTACTACGGCACCGTGACGCCGCCGGTGATCCTCCGCAACGTGCTGGAGAATCCCGGCTGGTACACCGCCTATACGCCCTACCAGCCGGAAATCGCCCAGGGCCGCCTGGAAGCGCTGCTGAATTTCCAG…	GTGATTCTCGCCGACGAGCAGGAAGAGTTCGGCGGCAGCCTGCTGGACACCCGCGAGACCCTCGACGGCAAGCCCGCCGCCGAGTGGGTCGCGGACGCCGTGGCCGAGCTGCAAGGCCTGCCGGAAGTCATCCTGCTACCGCGCTCCACGGTCAACGGCTACCACGACCACAACTTCCTCACCATCCACGAGCGGCGCACCGACCACCTCGGCGAGGTCGCCCCGCTCGGCCAGGTCCGCCAGCGCGTGCACCGCGTACGCGCCAAGCGCGTGGTACTGGCCGCCGGCGCCCATGAGCGGCCGCTGGTCTACGGCAACAACGACCTGCCCGGCAACATGCTCGCCGGCGCGGTTTCCACCTATGTACGGCGCTACGGCGTGGCACCGGGCAAGAAACTG…	GTACGCAGCTATCTCGAATGGCTGCTGGACAACCACTTCACCTTCCTCGGCTACGAGGAATTCAGCGTCGCCGACGAGGCCGACGGCGGGCGCATGGTCTACGACGAGAAATCCTTCCTCGGCCTGACCCGTCTGCTGCGTGCCGGCCTGAGCAAGGATGACCTGCACATCGAGGACTATGCCGTCGCCTACCTGCGCGAACCGGTCCTGCTGTCCTTCGCCAAGGCTGCCCATCCGAGCCGTGTGCACCGCCCGGCCTACCCGGACTACGTGTCGATCCGCGAGCTGGACGGCAAGGGCCGGGTGATCCGCGAGTGCCGCTTCATGGGCCTGTTCACCTCCTCGGTGTACAACGAGAGCGTCAACGACATCCCCTTCATCCGCGGCAAGGTCGCCGAA…	GTGTACGGCGAATATTCTCGGGAAAGCATTGTCTGCCTGCTCGCCATACTATTATCCGGCCATCACTACTTATATATAGACCTGAAACAACCGGCGGCCTGGAATGCAGAGTTGTGCCGGCAGGTCGACTGCCGCCTGATCCTCGACTGCTCGACCACGCCGACGCCCGCCAACGGTCTTCCCTGCGTCCCGGTCAGGCACCTGCCTGCCGCTCCAGCCTCGGTCGCCCGGCCATGCTTCGCGGCGGACCAGATCGCCTACATCAACTTCTCCTCGGGCACCACCGGCCGCCCGAAAGCCATCGCCTGCACCCACGCCGGCATTACCCGTCTGTGCCTGGGCCAGTCGTTCCTCGCGTTCGCTCCGCAGATGCGCTTCCTGGTGAACTCGCCGCTGTCC…	CTGCTGGAAGAAGGTGCGGACGAGGTATTCGAGGAAATCCTCGCCGCCGCTACGTCCTACTTCCAGACGCCCATCGCGCTCATTTCCATCCTCGACCATCAGCGCCAGTGGTTTCGCGCGAGCATCGGCCTCGATATCCGGCAGACGCCGCGACGGGATTCGTTCTGCGCCTATGCGATCCTGGGCAAGGGAGTATTCGAGGTGGCCGACGCCACCCTCGACCCGCGCTTCCGGGACAACCCCTATGTGCAAGGCGAACCGCGCATCCGCTTCTACGCCGGGGCTCCGCTGGCCACCGCGGAAGGTCTCAACCTCGGCAGCCTCTGCGTCATCGACCGGGAACCACGCGGGCCGCTGGCCGAGCGGGACGTCGCCATGCTCGAGCACTTCGCCCGGCTG…	ATGTCCCTGAGTGTCTTCGATCTGTTCAAGATCGGCATCGGGCCGTCCAGCTCCCACACCGTGGGGCCGATGCGTGCCGCCGCGCGCTTCGCCGAGGGGCTGAGGCGCGAGGGGTTGCTGGAGGCCACTGCCAGCGTCAAGGTCGAGCTGTACGGCTCGCTCGGCGCCACCGGCAAGGGCCACGGCAGCGACAAGGCGGTACTGCTCGGCCTGGAGGGCGAGCAGCCGGACACGGTGGATACCGCCGCGATTCCCGCCCGGCTCGATGCCATCCGTTCCAGCGGCGAGCTGCGCCTGCTCGGCGAGCGGCCGATCCGCTTCGTCGAGAAGGAACACCTGGCGCTGATCCGCAAGCCGCTGGCCTACCATCCCAACGGCATGATCTTCCGTGCCTTCGAC…	ATGAACAGAGTTTTCCTGACCCCGGCAGCCGTGGCGCTGTGCGGCGCGTCTTCCCTGAGCCTGGCCGAACCGGTCAGCCTTGCCGACCAGGTGGTGACCGCCACCCGTACCGCCCAGACCGCTTCCCAGAGCCTGGCGGCGGTGAGCGTCATCGACCGCGAGGATATCGAGCGCAGCCAGGCGCGCAGCGTGCCGGAGCTGTTGCGCCAGGTACCCGGCGTGTCGCTGGCGAACAACGGCGGTTTCGGCAAGAACACCACGCTGTTCCTGCGCGGCACCGAGTCCGACCATGTGCTGGTGCTGATCGACGGCATCAAGGTCGGCTCGGCCAGCGCTGGCCTCACCGCGTTCCAGGACTTGCCGGTGGAGCTGATCGAGCGCATCGAGGTGGTCCGCGGG…	GTGCGGGTGCTCAACTGGAGCTGGGGCATCCACCGCGTCGGCGCTCGCGACGTCGACGGCGACGAGGTGGATTCGCTGGTGCGCTCGGGGATCGCCATGAGCGGCTACGAGGAGTTGCTCGAGGAGTTCTTCCTCTGGCTGCGCAAGGAGCATCCGGACGTGCTGGTGGTCAACTCCGCCGGTAACGGCTCGTCCTACTCCGGTACCGACGAATACCGCCTGCCGTCCTCCTTCGTCACCGAGCAGTTGCTGGTGGTGGGCGGCCACCAGCGCAGCGAGCGCCAAGGCCTGGCGGTGGACGACCCGGCCTACGCGGTCAAGCGCAGCACCTCGAACGTCGACATGCGGGTGGATGTCACCGCCGCCGCCTGTACCCATGCCTCGACCCTGGAGCGGGAC…	TTGCAGGCAGCTTGCGCGTTCGGCCCGCCCGGGCGGCTATTCCGCGCCTGCGACGAGCAAGGACGCGAGGCGTTGCTGCTGCTCGCGGCGGTCGATGCCGACGAAGCGTTCTGGCAGCGCGAATGGGCATTGCGGCGCTGCCGTGCGGAGAGCCTGCCGCGAGTATTGTCGTCGCCCCGGTTGCGTCGTCATGCCTTCCAGTTGTTCGCTCCGCCGCGCTGGCCGATGCGCAGCCTGCTGGATTGGGCGCCAGCGCACCTGCCGCTGGAACCGCAATGCGCGCTGGTCCTCCTGGAGCAACTTATCGATGCGGTTCGCGCCTTGCAGCGGCGCGGCGTACAGGGCTTGTGGCTGGCGCCGCGGCAGATCCTGCTGGACGAGGGCGGGCGCCTGCTGTTC…	ATGTTCAACCCGGCCAACCAGACCCACTTCAGCCTCAGCCTCGACGGCCTCCGTCACGACCTGCAGGTTCTCGAATTCAGCGGCCACGAAGGCATCAGTCGCCCCTACCGTTTCGAACTCGAACTGGTCAGCGAGCGCGCCGGCCTCGACCTCGAAGCGCTCATGCACCGACCCGCCTTCCTCGCCTTCACCCCGCAGGGCCAGGGCGTCCACGGGCTGGTCTACGGCGCCGCCCAGGCCGACGCGGGCAAGCGCCTGACCCGCTATCGCCTCACCCTCGTGCCGCAACTGGCCTACCTCGCGCAGCGCAGCAACCAGCGGATCTTCCAGCACCTCACGGTGCCGCAGATCGTCGCCCTGGTCCTCGAGGAGCACGGCATCCTCGCCGACGCCTACCGC…	GTGGCTCTCCATCGCCTGGCCTTTATCTTCCTGTGCCTGCCGCTCATGGCCAGCGCCGCCCCCTTCACCTCCCCCGGCGACCGCGACCTGATCCGCGACCGCCAGCAGCGCCTGCTGGACGAACAGCGCAAGCGCCTGGAGGAACTCCAGCAACTGCCCGGCAAGGGAGCGCCCGCCGCTGCGGATGCCTCCGGCGACGACGAGCGCTGCTTCGAGATCCGCCGCATCGAGCTGGAGGGCGCCGGGCACCTCGGCGAAAGCGCGCGTCGCCAACTGCTGGCGCCCTACCAGGGGCGCTGCCTGGGCGTCGGCCAGCTCAATGCGCTGCTCAAGGCCGTCACCGACCATTACCTGGATCGCGGCTACGTCACCACCCGCGCCTACCTGCCACAGCAGGAC…	ATGGGTGACCGGCACGACTACGTCGCTCTGGAATGGGTGAAAGGCGAGATCGCCGAAACCCTGAAACAGGCGCGCCAGGCGCTGGAAGCGTTCGTCGAGAACCCGCAGGACCCGACCCGCATGCGGTTCTGCCTGACCTACGTGCACCA---GGTGCAGGGCACCCTGCAGATGGTCGAGTTCTACGGCGCGGCCCTGCTCGCCGAGGAAATGGAGCAGTTGGTCCAGGCCTTGCTGGACGGTCGCGTGCCGAACCAGAGCGAGGCCCTGGAAGTGCTGATGCAGGCGATCCTGCAACTGCCGGTCTACCTCGACCGGATCCAGACCGCCCGGCGCGACCTGCCGATGGTGGTCCTGCCGCTGCTCAACGACCTGCGCGCCGCGCGCGGCGAGAAGCTG…
4	ATGACCTTCGACGCCGCGTTCCAGCAGCTCGGCGAGCGGATGGCCGGCGGGGCCCTGGCGGAAACGGCGCTGGCGCCGTTCACCCATCTGCTGATCGACGAGTTCCAGGATGTCTCGCCGCAGATCGTCCTCTGGCTACAGGCGTTGCACCGCCGCCTGGCGA---ACCAGGGCACCGCGCCGAGCCTGATGGCCATCGGCGACGACTGGCAGTCGATCTACGGCTGGCGCGGCAGTTCGCCGGAGCTGTTCATCGACTTCGACCGGCACTTCCCCTCGCGTGGGCGGGGACGCAAGAGCGCGCTGCTGGTGCTGGAAACCAACTACCGCTCCGTCGAACCGATCATTCGCGACGGCGAGAAGGTGCTGGCCGGGGTGCGTTTCAAGCAGGACAAGACC…	ATGCACCTGTTGCGCACCCAACCCGGCGGCTTCGTTCCCGACGACGGCATCGCCCACCTGGCCCAGACTCCCGCCGAGCTGGTGATCCTCTGCAGCGGCGATTCGCACCTCGCATTGCTGGCCGAGGCCGCCCGTGCGCTGCCGGACGACTACCCGAGCCTGCGCCTGGCCAACCCCATGCAGTTGCAGAACCACGCCTCGGTGGACCTCTACGTCGAGGAAGTGCTGCGGCACGCGCGGGTGATCCTGCTTTCGCTGCACGGCGGCATCGGCTACTGGCGCTACGGCGTGGAGCAACTGGTGGCGCTGGCCGAGCGCGGCGCGCTGCTGATCCCGGTGCCCGGCGACGACCGCCCCGACCCGGAGCTGAGCGCCCTTGGCAACCTGCCGGCGGAGCAG…	ATGTTCGAACGCATCATCCAATTCGCCATCGAGCAACGCTGGCTGGTCCTGCTGGCGGTGCTGGGGATGGCCGGGGTCGGCATCGGCAGCTACCAGAAGCTGTCCATCGACGCGGTCCCGGACATCACCAACGTCCAGGTGCAGATCAATACCGCCGCCCCCGGCTACTCGCCGCTGGAAGTGGAGCAGCGGATCACCTACCCGGTGGAGACCGTCATGGCCGGCCTGCCGGGTTTGCAGGAAACCCGTTCGCTGTCGCGGCCGGGGATTTCCCAGGTGACGGTGATCTTCGAGGAGGGCACCGATATCTACTTCGCCCGCCAGCAGGTCAACGAACGCCTGAGCACGGCGCGCGAGCAACTGCCGGAAGACATCTCGCCGACCCTCGGGCCGATCTCC…	ATGTCCTTCAACCTTTCCGCCTGGGCGTTGCAGAATCGCCAGATCGTCCTGTACCTGATGATCCTGCTTGGCGCGGTTGGCGCGCTGTCCTACAGCAAGCTGGGGCAGAGCGAAGACCCGCCGTTCACCTTCAAGGCCATGGTGGTGCAGACCAACTGGCCGGGTGCCAGCGCCGAAGAGGTGGCCCGGCAGGTCACCGAGCGTATCGAGAAGAAGCTGATGGAAACCGGCGACTACGATCGCATCGTGTCCTTCTCCCGCCCCGGCGTCTCGCAGGTGACCTTCATGGCCCGCGAGGACATCCATTCCAGCGAGATCCCCGAACTCTGGTACCAGATCCGCAAGAAGATCAGCGACATTCGCGCCACCTTGCCGCAAAGCATCCAGGGCCCGTTCTTC…	ATGCGCACCGAGCAACCGAAAGTCATCCACCTCAAGGACTATCAGGCGCCGGACTACCTGATCGACGAGACCCACCTGAAGTTCGAACTGTTCGAAGACCACAGCCTGGTACACGCCGAGTTGAAGCTGCGGCGCAACCCCGAGCGCGGCGCCGGCCTGCCGCCGCTGTTGCTGCATGGCCAGCAACTGGAGCTGCTGGCGCTCGAACTGGACGGCCAGGCGCTCGGCGCGGACGACTACCAACTGGACGACGAGCAGCTCGGGGTGCAACCGCGGCAGGCCGAATTCGTCCTCAGGAGCACGGTGCGTATCCATCCGGAGAGCAACACCGCGCTGGAAGGCCTGTACAAGTCCGGCAAGATGTTCTGCACCCAGTGCGAGGCCGAGGGTTTCCGCAAG…	ATGACCGATAACCTGAACCTCGGCGCCATCGACCTGGGCACCGACGACGAATTCATCGCCCGCCATATCGGCCCGCGTGCCGCCGACACCCAGGCCATGCTCCAGCGCCTGGGCTACGACTCGCTGGACGCGCTGATCGGCAACGTGATCCCCGACAGCATCAAGGGCAGCAGCGTGCTCGACCTGCCGGCCGGCATGGGCGAGGCCGAGGCGCTGGCCAGCCTGAAGGCGATCGCCGCGCGCAATCGCGCGTTGCGTTCCTTCATCGGCCAGGGCTACTACAACTGCCACACCCCGGCACCGATCCTGCGCAACCTCCTGGAGAACCCGGCCTGGTACACCGCCTACACGCCGTACCAGCCGGAAATCTCCCAGGGCCGCCTGGAGGCGCTGCTGAAC…	GCAGGTTTCCCATGACGAGCTGGTCGCTCGCCTGTCCATGGTCGGCCTCGAGGTCGACGCCGACCTGCCGGTCGCCGGCGCCTTCAGCGGCGTGGTGGTCGGCGAGGTGCTCTCGACCGAACAGCATCCGGACGCCGACAAGCTGCGCGTCTGCCAGGTCAGCAACGGCAGCGAGACCTTCCAGGTCGTCTGCGGCGCGCCCAACGTGCGCGCGGGCCTGAAGATTCCCTTCGCCATGATCGGCGCCGAACTGCCGGGCGACTTCAAGATCAAGAAAGCCAAGCTGCGTGGCGTCGAGTCCTTCGGCATGCTCTGCTCGGCCAAGGAATTGCAGATCAGCGAAGAGAACGCCGGTCTGCTCGAGCTGCCGGCTGACGCGCCGGTCGGCCAGGACGTCCG…	ATGAGCGAGAACAACACGTACGACTCTTCCAGCATCAAGGTGCTGAAGGGGCTGGATGCCGTACGCAAGCGCCCCGGCATGTACATCGGCGACACCGACGATGGCACCGGTCTGCACCACATGGTGTTCGAGGTGGTGGATAACTCCATCGACGAAGCGCTGGCCGGTTACTGCAGCGAAATCAGCATCACCATCCATACGGATGAGTCGATCACTGTCCGCGACAATGGACGCGGTATTCCGGTGGATATCCACAAGGAAGAAGGGGTTTCTGCGGCGGAAGTGATCATGACCGTCCTCCACGCCGGCGGCAAGTTCGACGACAACACCTACAAGGTGTCCGGCGGCTTGCACGGTGTGGGCGTCTCGGTGGTGAACGCGCTGTCCCATGAACTGCGC…	ATGCTGATCCTGCGCGGCGCTCCCGCCCTTTCCGCTTTCCGCCACGGCAAACTGCTCGAGCAACTGACCCAGCACGTACCTGCCGTTACCGGGCTGTACGCTGAGTTCGCGCATTTCGCCGACGTCACCGGCGCGCTCACCGCCGACGAGGAGCAGGTGCTGGCGCGGCTGCTGAAATACGGCCCGAGCGTGCCGGTGCAGGAGCCCAGCGGACGGCTGTTCCTGGTGGTGCCGCGCTTCGGCACCATCTCGCCGTGGTCGAGCAAGGCCTCCGACATCGCCCGCAACTGCGGCCTGGCGAAGATCGACCGGCTGGAGCGCGGCATTGCCTACTATGTGCAGGGCGAACTGTCCGAGAGCGACGCCCAGCAGGTCGCCGCCCGCCTGCATGACCGCATG…	ATGAGTGGCCGCTCCGCTGGTTTCGCCCTGCCCAGCCGCGACGAGTGGCGGCGCGCGCTGGCCGAGTGGGCGCGCAGCGACGGGGCGACCTGGATCTACGTGTTCAAGGTGCTCTGCGCGGCCTTCCTGACCCTCTGGCTGGCGATGCGCCTGGAATTGCCGCAGCCGAGCACGGCGACCATCACCGTGTTCATCGTCATGCAGCCGCAGAGCGGCCAGGTGTTCGCCAAGAGCTTCTACCGCATCCTCGGCACCCTGGTCGGCCTCAGCGTGATGGTCACCCTGATCGCCCTGTTCGCCCAGGAGCGAGTGCTGTTCCTGCTCAGCTCGGCGATCTGGATCGGCCTCTGCACCGCCGGGGCCGCCCGCTACCGTGACTTCCGCTCCTACGCCTGCGTG…	ATGAGCGAATCCCTCGATCTGAGCCTGGAAGGGGTCGAACGCCGGTCGTTGGCCGAGTTCACCGAGCAGGCCTATCTGAATTATTCCATGTACGTGATCATGGACCGCGCCCTGCCGCATATCGGCGACGGCCTGAAACCGGTGCAGCGACGCATCGTCTACGCCATGAGCGAACTGGGGCTGGATGCCGATTCCAAGCACAAGAAGTCGGCGCGCACCGTCGGCGACGTGCTCGGCAAGTTCCACCCGCACGGCGACTGGGCCTGCTACGAGGCCATGGTGCTGATGGCGCAGCCGTTCTCCTATCGCTATCCGCTGGTGGACGGCCAGGGCAACTGGGGGGCGCCGGACGATCCCAAGTCCTTCGCCGCCATGCGTTATACCGAGGCGCGCCTGTCG…	ATGTCTTCACGCAAGATCGGGCTCAACCTGGTGGTCATCGTCGCCCTGGCCGCCCTCTTCACCGGCATCTGGGCCCTGTACAACCGTCCGGTCAGCGTACCGGACTGGCCGGAACGCATCTCCGGCTTCTCCTTCTCGCCGTTCCGCCTCAACCAGAATCCGCAGAGCGGCCGCTACCCCAGCGCCGAACAGATGCGCGCCGACCTGGAACTGGTCGCCCGGCACACCCACAGCATCCGCACCTATTCGGTCCAGGGCGCGCTCGGTGACATCCCGGCGCTGGCCGAGGCGTTCGGCCTGCGCGTCAGCCTGGGCATCTGGCTCGGCCCGGACCTGGCCGGCAACGAGGCCGAGATCGCCCGCGCCATCCGCATCGCCAACGAGTCGCCGAGCGTGGTG…	ATGACCGCCATGCCCGAAATACTTCGCGAAGATACGCTGAACATCCCCGACAGCCGTGGGCTGAATCTCTACACCTGCGATCCGGCCCTGGAGCGGCTGCTGGAGGTATACCTGCCGCCGGCGTTGCTCGCCGAATGGCGGCCGCTCCTCGAACGGCTCGGCGCCCGTGCCGGCGGCGAGCTGGACGTGCTGGCGCTGGCGGCGGACAAGAACCCGCCGGTGCTGGCGCCGCGCACCCGCCGCGGCGAGGATTTGCAGAGCATTCGCAAGCATCCGGACTACGTCGCCCTCGAACGGGTGGCCTATGCCGAACTTGGCCTGGCTTCCATGAGCCATCGCCCGGACGGCCCGCCGCCGCTGGTGAAGTATGCGCTCACCCACCTGTTCGTACAGGCCGAG…	ATGTCCGAATTCTTCATCAAGCGGCCGAACTTCGCCTGGGTGGTGGCCCTGTTCATCTCCCTGGCCGGCCTGCTGGTCATTTCCAAATTGCCGGTAGCGCAGTACCCCAATGTCGCGCCGCCACAGATCACCATCACCGCCACCTATCCCGGCGCCTCGGCGAAGGTGCTGGTGGACTCCGTCACCAGTGTGCTCGAGGAGTCGCTGAACGGCGCCAAGGGCCTGCTCTACTTCGAGTCGACCAACAACTCCAACGGCACCGCCGAGATCGTCGTCACCTTCGAGCCGGGCACCGATCCGGACCTGGCCCAGGTGGACGTGCAGAACCGCCTGAAGAAAGCCGAGGCGCGCATGCCGCAGGCGGTGCTGACCCAGGGCCTGCAGGTCGAGCAGACCAGC…	ATGAGCCAGCAGCAGATGCCCGTGGCCCTCGATCCGCTGGACTTCCCGTTGCACGGCAGCCGCCTGATCGAGGCCAGCGCCGGTACCGGCAAGACGTTCACCATCGCCCTGCTATACGTACGCCTGGTCCTCGACCATGGCGGCGAGAACGCTTTCGGCCGGCCGCTGAGCCCGCCGGAAATCCTCGTGGTGACCTTCACCGATGCGGCGACCCAGGAACTCCGCGAGCGTATCCGCAGCCGCCTGGGCGAAGCGGCGCGTTGTTTCGCCGAGCCGCAGGAGCGCCACGACGGCCTGCTGGTCGCGTTGCGCCAGCAGTATCCCGCCGAGCGCTGGCCGGGCTGCGCGCGCCTGCTGCGCCTGGCCGCGGAGTGGATGGACGAGGCCGCGGTATCGACC…	ATGAGGCGCGCCAGCCTGCATATGTTGCTCTGCCAGTTCGCCATGGCCCTGGGCCTGCTCCTGAGCCTGGGCAGCGAGGCCTGGGCCGCCAGGCCGGCTCCGCAGGCGGCCGTCGACCTGGAAGCGCCGGCCGCCCTGGCCGAGGACGCCAGCCTCGACCAGCTCAACGCGCAACTCGACCTGATCCGCCAGCGCGTCACCGCCGACGCCAGCGACGACCTCCTCGCCGAGTTGCGCCAGAGCGCGCTGCAAGTCCAGCGCCAGGCCGACGCCCTGCTCGCGCTGCGGGTGGCCGACATCGAGCGGCTCGACGATCAGTTGAAAGTGATCGGCCCGCCGCAGCCCGACGAGGCGGAAAGCCTCGCCGCCCAGCGCCAGGCCCTGACCCGGCAGAAGAAC…	CTGCTGTTCGCCGCAGTGGTCATCGGCTTCCCCCAGCGCGCCGGCGAATGGCTGCTGGCCGCGCAGACCTGGGCCTCGCAGACCGTCGGCTGGTACTACCTGCTGGCGATGACGCTGTACCTGATCTTCGTGGTGGTCACCGCGCTTTCCGGCTACGGCAAGATCAAGCTCGGTGCCGACCACGACGAGCCGGAATTCAGCTACCTGTCCTGGGCCGGCATGCTGTTCGCCGCCGGCATCAGCATCACCCTGTTCTTCTTCTGCGTATCCGAACCGCTGACCCACTTCCTCCAGCCGCCGCAAGGCGAGGCCGGTACCCAGGAAGCCGCGCGGCAGGCCATGGAACTGCTGTTCCTGCACTGGGGCCTGCACGGCTGGGGCGTATTCGCCCTGGTGGCG…	ATGGTCCAGGGCACCACCTCGGACGCCGGCAAGAGCACCCTGGTGACCGCGCTGTGCCGCTGGCTGGCCCGGCGCGGCGTCGCGGTGGTGCCGTTCAAGCCGCAGAACATGGCGCTGAACAGCGCGGTCACCGCCGACGGCGGCGAGATCGGCCGCGCCCAGGCGGTCCAGGCCCAGGCCTGCCGGCTGGCGCCGCACACCGACATGAACCCGGTGCTGCTCAAGCCGAACACCGACATCGGCGCCCAGGTGATCATCCATGGCCGCGCGGTGACCAGCATGGACGCCGCCGCCTACCACGACTACAAGCGCGTGGCGATGGAAGCGGTGCTGGCTTCCCATGGGCGGCTCGCCGCCGCCTACCGGGTGGTGATGGTGGAGGGCGCCGGCTCGCCGGCG…	ATGGCCAGCCTGTTCCTCGGTCGCAAGGAAATCGACGACGACCTGCTCGACGACATCGAGACGCGCCTGCTGACCGCCGACGTCGGCGTCGAGGCCACCACCCTGATCGTGCAGAACCTGACCAAGCGCGTGGCGCGCAAGGAGCTGGCCGACAGCGGCGCGCTGTACAAGGCGCTGCAGGAAGAGCTGGCCAGCCTGCTGCGCCCGGTGGAGCAGCCGTTGCAGGTCGACGTCGCGCGCGAGCCCTATGTGATCCTGGTGGTCGGGGTGAACGGCGTGGGCAAGACCACCACCATCGGCAAGCTGGCGAAGAAGCTGCAACTCGAGGGCAAGAAGGTCATGCTGGCCGCCGGCGACACCTTCCGCGCCGCCGCCGTGGAGCAGTTGCAGGTCTGGGGC…	TTGCGTATCGAGAACTTCGCGCCCATCGACAGCCAGGGTTTCCGTTTCCTGCTCCGGCCGGGGGATGAGCCTCTGCTCGCGGTCCTCGATCGAGCCCTGCCGCGTATCAATGGGCGCTACGGCGACGAACTGTTGCGCAGTTGGAGCGCCGGGCGGCGCCTGCGTTTCGACGAGCCCAGGGTGACGCTTGCGCCGGCGGAACAGCGTTGGCTCTCCACGCATCCGGTCGTGCCGGTGGTGATCAACCATTCCCTTGGCGCGCTCGGGCAACTGGATAGCGAGGGGCGGCTGAGCGGTATCGGGCGTGACTATCTGGACCTGATCGGCAAGCGCAGCGGCCTGCAGTTTTCCTTCAGCGGAGCCCGAAACTTCGTCGAGGCGAAACGTCGACTGGATGCG…	CGAGCCACCGCCCGCAGACGACTACTACGAAGTCGACATGGATACCCTGGCCTACCTGGATGCCGCGCCCGAGCCTGACGTGGTCGTGGTGGAGGAGCCGCTGCCGGCGGCGAAGCCGGCCACCGGCCTGGCCGCGGAGTGGCTGGAGCTGTTCCCGCGGCTCGGCCTCGGCGGCCTGACCGCCAGCATCGGTGCCAACTGTACGCTGGTAGCTGCCGACGGCGACCACTGGCATCTGCATCTCGATCCGGGCCAGAGCGCGCTGTTCAACGCCACCCAGCAGCGGCGGCTGAACGATGCGCTGAACCAGCACCTGGGGCGCACCCTCAAACTGGAGGTGACCCTGCAGAAGCCTGAGCAGGAGACCCCGGCCCAGGCAGCGGCACGCCGGCGTGCCGA…	ATGTCGCAGACGCCGTCCCTCGCCCAGCTCCAGCCCGCCGATGCCTTCCTGCGCCGCCACCTCGGCCCCGATCCGGCGGAACAGCAGGCCATGCTGGACTTCCTCGGAGTTTCCACTCGCGCCGAACTGATCGTGCAGACGGTGCCGCCGGCGATCCGCCTCAACCGGCCGCTGGAACTGCCCGCCGCGCTCGACGAACAGGCCGCCCTGGCGCGCCTGCGCGGCTACGCCGGGCTCAACCAGCGCTGGACCAGCCTGATCGGCATGGGCTACTACGGCACCGTGACGCCGTCGGTGATCCTCCGCAACGTGCTGGAGAATCCCGGCTGGTACACCACCTATACGCCCTACCAGCCGGAAATCGCCCAGGGCCGCCTGGAAGCGCTGCTGAATTTCCAG…	GTGATTCTCGCCGACGAGCAGGAAGAGTTCGGCGGCAGCCTGCTGGACACCCGCGAGACCCTCGACGGCAAGCCCGCCGCCGAGTGGGTCGCGGACGCCGTGGCCGAGCTGCAAGGCCTGCCGGAAGTCATCCTGCTACCGCGCTCCACGGTCAACGGCTACCACGACCACAACTTCCTCACCATCCACGAGCGGCGCACCGACCACCTCGGCGAGGTCGCCCCGCTCGGCCAGGTCCGCCAGCGCGTGCACCGCGTACGCGCCAAGCGCGTGGTACTGGCCGCCGGCGCCCATGAGCGGCCGCTGGTCTACGGCAACAACGACCTGCCCGGCAACATGCTCGCCGGCGCGGTTTCCACCTATGTACGGCGCTACGGCGTGGCACCGGGCAAGAAACTG…	GTACGCAGCTATCTCGAATGGCTGCTGGACAACCACTTCACCTTCCTCGGCTACGAGGAATTCAGCGTCGCCGACGAGGCCGACGGCGGGCGCATGGTCTACGACGAGAAATCCTTCCTCGGCCTGACCCGTCTGCTGCGTGCCGGCCTGAGCAAGGATGACCTGCACATCGAGGACTATGCCGTCGCCTACCTGCGCGAACCGGTCCTGCTGTCCTTCGCCAAGGCTGCCCATCCGAGCCGCGTGCACCGCCCGGCCTACCCGGACTACGTGTCGATCCGCGAGCTGGACGGCAAGGGCCGGGTGATCCGCGAGTGCCGCTTCATGGGCCTGTTCACCTCCTCGGTGTACAACGAGAGCGTCAACGACATTCCCTTCATCCGCGGCAAGGTCGCCGAA…	GTGTACGGCGAATATTCTCGGGAAAGCATTACCTGCCTGCTCGCCATACTGTTATCCGGCCATCACTACTTATATATAGACCTGAAACAACCGGCGGCCTGGAATGCAGAGTTGTGCCGGCAGGTCGACTGCCGCCTGATCCTCGACTGCTCGACCACGCCGACGCCCGCCAACGGTCTTCCCTGCGTCCCGGTCAGGCACCTGCCTGCCGCTCCAGCCTCGGTCGCCCGGCCATGCTTCGCGGCGGACCAGATCGCCTACATCAACTTCTCCTCGGGCACCACCGGCCGCCCGAAAGCCATCGCCTGCACCCACGCCGGCATTACCCGCCTGTGCCTGGGCCAGTCGTTCCTCGCGTTCGCTCCGCAGATGCGCTTCCTGGTGAACTCGCCGCTGTCC…	TTGCTGGAAGAAGGTGCGGACGAGGTATTCGAGGAAATCCTCGCCGCCGCTACGTCCTACTTCCAGACGCCAATCGCGCTCATTTCCATCCTCGACCACCAGCGCCAGTGGTTTCGCGCGAGCATCGGCCTCGATACCCGGCAGACGCCGCGACGGGATTCGTTCTGCGCCTACGCGATCCTGGGCAAGGGAGTCTTCGAGGTGGCCGACGCCACCCTCGACCCGCGCTTCCGGGACAATCCCTATGTGCAAGGCGAACCGCGCATCCGCTTCTACGCCGGGGCTCCGCTGGCCACCGCGGAGGGTCTCAACCTCGGCAGCCTCTGCGTCATCGACCGGGAACCACGCGGGCCGCTGTCCGAGCGCGACATCGCCATGCTCGAGCATTTCGCCCGCCTG…	ATGTCCCTGAGTGTCTTCGATCTGTTCAAGATCGGCATCGGGCCGTCCAGCTCCCACACCGTGGGGCCGATGCGTGCCGCCGCGCGCTTTGCCGAGGGGCTGAGGCGCGAGGGGTTGCTGGAGGCCACTGCCAGCATCAAGGTCGAGCTGTACGGCTCGCTCGGCGCCACCGGCAAGGGCCACGGCAGCGACAAGGCGGTACTGCTCGGCCTGGAGGGCGAGCAGCCGGACACGGTGGATACCGCCGCGATTCCCGCTCGGCTCGATGCCATCCGTTCCAGCGGCGAGCTGCGCCTGCTCGGCGAGCGGCCGATCCGCTTCGTCGAGAAGGAACACCTTGCGCTGATCCGCAAGCCGCTGGCCTACCATCCCAACGGCATGATCTTCCGTGCCTTCGAC…	ATGAACAGAGTTTTCCTGACCCCGGCAGCCGTGGCGCTGTGCGGCGCGTCTTCCCTGAGCCTGGCCGAACCGGTCAGCCTTGCCGACCAGGTGGTGACCGCCACCCGTACCGCCCAGACCGCTTCCCAGAGCCTGGCGGCGGTGAGCGTCATCGACCGCGAGGATATCGAGCGCAGCCAGGCGCGCAGCGTGCCGGAGCTGTTGCGCCAGGTACCCGGCGTGTCGCTGGCGAACAACGGCGGTTTCGGCAAGAACACCACGCTGTTCCTGCGTGGCACCGAGTCCGACCATGTGCTGGTGCTGATCGACGGCATCAAGGTCGGCTCGGCCAGCGCTGGCCTCACCGCGTTCCAGGACTTGCCGGTGGAGCTGATCGAGCGCATCGAGGTGGTCCGCGGG…	GTGCGGGTGCTCAACTGGAGCTGGGGCATCCACCGCGTCGGCGCTCGCGACGTCGATGGCGACGAGGTGGATTCGCTGGTGCGCTCGGGGATTGCCATGAGCGGCTACGAGGAGTTGCTCGAGGAGTTCTTCCTCTGGCTGCGCAAGGAGCATCCGGACGTGCTGGTGGTCAACTCCGCCGGCAACGGCTCGTCCTACTCCGGTACCGACGAATACCGCCTGCCGTCCTCCTTCGTTACCGAGCAGTTGCTGGTGGTGGGCGGCCACCAGCGCAGCGAGCGCCAAGGCCTGGCGGTGGACGACCCGGCCTACGCGGTCAAGCGCAGCACCTCGAACGTCGACATGCGGGTGGATGTCACCGCCGCCGCCTGTACCCATGCCTCGACCCTGGAGCGGGAC…	TTGCAGGCGGCTTGCGCGTTCGGCCCGCCCGGGCGGCTGTTCCGCGCCTGCGACGAGCAAGGACGCGAGGCGTTGCTGCTGCTCGCGGCGGCCGATGCCGACGAAGCGTTCTGGCAGCGCGAATGGGCACTGCGGCGCTGCCGTGCGGAGAGCCTGCCGCGAGTATTGTCGTCGCCCCGGTTGCGTCGTCATGCCTTCCAGTTGTTCGCTCCGCCGCGCTGGCCGATGCGCAGCCTGCTGGATTGGGCGCCAGCGCACCTGCCGCTGGAACCGCAATGCGCGCTGGTCCTCCTGGAACAACTTATCGATGCGGTTCGCGCCTTGCAGCGGCGCGGTGTACAGGGCTTGTGGCTGGCGCCGCGGCAGATCCTGCTGGACGAGGGTGGGCGCCTGCTGTTC…	ATGTTCAACCCGGCCAACCAGACCCACTTCAGCCTCACCCTCGACGGCCTCCGCCACGACCTGCAGGTCCTCGCCTTCAACGGCCACGAAGGCATCAGTCGCCCCTACCGTTTCGAACTCGAACTGGTCGGAGAGCGCGCCGGCCTCGACCTCGAAACGTTCCTCCACCGGCCCGCCTTCCTCGCCTTCACCCCGCAGGGCCAGGGTGTCCACGGCCTGGTCTACGGCGCTGCCCAGGGCGATGCCGGCAAGCGCCTGACCTGCTATCGCCTCACCCTCGTCCCGCACCTGGCCTACCTCGCCCAGCGCAACAACCAGCGGATCTTCCAGCACCTCACGGTGCCGCAGATCGTCGCCCTGGTCCTCGAGGAGCACGGCATCCTCGCCGACGCCTACCGC…	GTGGCTCTCCATCGCCTGGCCTTTATCTTCCTGTGCCTGCCGCTCATGGCCAGCGCCGCCCCCTTCACCTCCCCCGGCGACCGCGACCTGATCCGCGACCGCCAGCAGCGCCTGCTGGACGAACAGCGCAAGCGCCTGGAGGAACTCCAGCAACTGCCCGGCAAGGGAGCGCCCGCCGCTGCGGATGCCTCCGGCGACGACGAGCGCTGCTTCGAGATCCGCCGCATCGAGCTGGAAGGCGCCGGGCACCTCGGCGAAAGCGCGCGTCGCCAGTTGCTGGCGCCCTACCAGGGGCGCTGCCTGGGCGTCGGCCAGCTCAATGCGCTGCTCAAGGCCGTCACCGACCATTACCTGGATCGCGGCTACGTCACCACCCGCGCCTACCTGCCACAGCAGGAC…	ATGGGTGACCGGCACGACTACGTCGCTCTGGAATGGGTGAAAGGCGAGATCGCCGAAACCCTGAAACAGGCGCGCCAGGCGCTGGAAGCGTTCGTCGAGAACCCGCAGGACCCGACCCGCATGCGGTTCTGCCTGACCTACGTGCACCA---GGTGCAGGGCACCCTGCAGATGGTCGAGTTCTACGGCGCGGCCCTGCTCGCCGAGGAAATGGAGCAGTTGGTCCAGGCCTTGCTGGACGGTCGCGTGCCGAACCAGGGCGAGGCCCTGGAAGTGCTGATGCAGGCGATCCTGCAACTGCCGGTCTACCTCGACCGGATCCAGACCGCCCGGCGCGACCTGCCGATGGTGGTCCTGCCGCTGCTCAACGACCTGCGCGCCGCGCGCGGCGAGAAGCTG…
5	ATGACCTTCGACGCCGCGTTCCAGCAGCTCGGCGAGCGGATGGCCGGCGGGGCTCTGGCGGAAACGGCATTGGCGCCGTTCACCCATCTGCTGATCGACGAGTTCCAGGATGTCTCGCCGCAGATCGTCCTCTGGCTACAGGCGTTGCACCGTCGCCTGGCAA---CCCAGGGCACCGCGCCGAGCCTGATGGCCATCGGCGACGACTGGCAGTCGATCTACGGCTGGCGCGGCAGTTCGCCGGAGCTGTTCATCGACTTCGACCGGCACTTCCCCTCGCGTGGGCGGGGACGCAAGAGCGCGCTGCTGGTGCTGGAAACCAACTACCGCTCCGTCGAACCGATCATTCGCGACGGCGAGAAGGTGCTGGCCGGGGTGCGTTTCAAGCAGGACAAGACC…	ATGCACCTGTTGCGCACCCAACCCGGCGGCTTCGTTCCCGACGACGGCATCGCCCACCTGGCCCAGACTCCCGCCGAGCTGGTGATCCTCTGCAGCGGCGATTCGCACCTCGCATTGCTGGCCGAGGCCGCCCGTGCGCTGCCGGACGACTACCCGAGCCTGCGCCTGGCCAACCCCATGCAGTTGCAGAACCACGCCTCGGTGGACCTCTACGTCGAGGAAGTGCTGCGGCACGCGCGGGTGATCCTGCTTTCGCTGCACGGCGGCATCGGCTACTGGCGCTACGGCGTGGAGCAACTGGTGGCGCTGGCCGAGCGCGGCGCGCTGCTGATCCCGGTGCCCGGCGACGACCGCCCCGACCCGGAGCTGAGCGCCCTCGGCAACCTGCCGGCGGAGCAG…	ATGTTCGAACGCATCATCCAATTCGCCATCGAGCAACGCTGGCTGGTCCTGCTGGCGGTGCTGGGGATGGCCGGGGTCGGCATCGGCAGCTACCAGAAGCTGTCCATCGACGCGGTCCCGGACATCACCAACGTCCAGGTGCAGATCAATACCGCCGCCCCCGGCTACTCGCCGCTGGAAGTGGAGCAGCGGATCACCTACCCGGTGGAGACCGTCATGGCCGGCCTGCCGGGTTTGCAGGAAACCCGTTCGCTGTCGCGGCCGGGGATTTCCCAGGTGACGGTGATCTTCGAGGAGGGCACCGATATCTACTTCGCCCGCCAGCAGGTCAACGAACGCCTGAGCACGGCGCGCGAGCAACTGCCGGAAGACATCTCGCCGACCCTCGGGCCGATCTCC…	ATGTCCTTCAACCTTTCCGCCTGGGCGTTGCAGAATCGCCAGATCGTCCTGTACCTGATGATCCTGCTTGGCGCGGTTGGCGCGCTGTCCTACAGCAAGCTGGGGCAGAGCGAAGACCCGCCGTTCACCTTCAAGGCCATGGTGGTGCAGACCAACTGGCCGGGCGCCAGCGCCGAAGAGGTGGCCCGGCAGGTCACCGAGCGTATCGAGAAGAAGCTGATGGAAACCGGCGACTACGATCGCATCGTGTCCTTCTCCCGCCCCGGCGTCTCGCAGGTGACCTTCATGGCCCGCGAGGACATCCATTCCAGCGAGATCCCCGAACTCTGGTACCAGATCCGCAAGAAGATCAGCGACATTCGCGCCACCTTGCCGCAAAGCATCCAGGGCCCGTTCTTC…	ATGCGCACCGAGCAACCGAAAGTCATCCACCTCAAGGACTATCAGGCGCCGGACTACCTGATCGACGAGACCCACCTGAAGTTCGAACTGTTCGAAGACCACAGCCTGGTACACGCCGAGCTGAAGCTGCGGCGCAACCCCGAGCGCGGCGCCGGCCTGCCGCCGCTGTTGCTGCATGGCCAGCAACTGGAGCTGCTGGCGCTCGAACTGGACGGCCAGGCGCTCGGCGCGGACGACTACCAACTGGACGACGAGCAGCTCGGGGTGCAACCGCGGCAGGCCGAATTCGTCCTCAGGAGCACGGTGCGTATCCATCCGGAGAGCAACACTGCGCTGGAAGGCCTGTACAAGTCCGGCAAGATGTTCTGCACCCAGTGCGAGGCCGAGGGTTTCCGCAAG…	ATGACCGATAACCTGAACCTCGGCGCCATCGACCTGGGCACCGACGACGAATTCATCGCCCGCCATATCGGCCCGCGCGCCGCCGACACCCAGGCCATGCTCCAGCGCCTGGGCTACGACTCGCTGGACGCGCTGATCGGCAACGTGATCCCGGACAGCATCAAGGGCAGCAGCGTGCTCGACCTGCCGGCCGGCATGGGCGAGGCCGAGGCGCTGGCCAGCCTGAAGGCGATCGCCGCGCGCAATCGCGCGTTGCGTTCCTTCATCGGCCAGGGCTACTACAACTGCCACACCCCGGCACCGATCCTGCGCAACCTCCTGGAGAACCCGGCCTGGTACACCGCCTACACGCCGTACCAGCCGGAAATCTCCCAGGGCCGCCTGGAGGCGCTGCTGAAC…	GCAGGTTTCCCATGACGAGCTGGTCGCTCGCCTGTCCATGGTCGGCCTCGAGGTCGACGCCGACCTGCCGGTCGCCGGCGCCTTCAGCGGCGTGGTGGTCGGCGAGGTGCTCTCGACCGAACAGCATCCGGACGCCGACAAGCTGCGCGTCTGCCAGGTCAGCAACGGCAGCGAGACCTTCCAGGTCGTCTGCGGCGCGCCCAACGTGCGCGCGGGCCTGAAGATTCCCTTCGCCATGATCGGCGCCGAACTGCCGGGCGACTTCAAGATCAAGAAAGCCAAGCTGCGTGGCGTCGAGTCCTTCGGCATGCTCTGCTCGGCCAAGGAATTGCAGATCAGCGAAGAGAACGCCGGTCTGCTCGAGCTGCCGGCCGACGCGCCGGTCGGCCAGGACGTCCG…	ATGAGCGAGAACAACACGTACGACTCTTCCAGCATCAAGGTGCTGAAGGGGCTGGATGCCGTACGCAAGCGCCCCGGCATGTACATCGGCGACACCGACGATGGCACCGGTCTGCACCACATGGTGTTCGAGGTGGTGGATAACTCCATCGACGAAGCGCTGGCCGGTTACTGCAGCGAAATCAGCATCACCATCCATACGGATGAGTCGATCACTGTCCGCGACAATGGACGCGGTATTCCGGTGGATATCCACAAGGAAGAAGGGGTTTCTGCGGCGGAAGTGATCATGACCGTCCTCCACGCCGGCGGCAAGTTCGACGACAACACCTACAAGGTGTCCGGCGGCTTGCACGGTGTGGGCGTCTCGGTGGTGAACGCGCTGTCCCATGAACTACGC…	ATGCTGATCCTGCGCGGCGCTCCCGCCCTTTCCGCTTTCCGCCACGGCAAACTGCTCGAGCAACTGACCCAGCACGTACCTGCCGTTACCGGGCTGTACGCTGAGTTCGCGCATTTCGCCGACGTCACCGGCGCGCTCACCGCCGACGAGGAGCAGGTGCTGGCGCGGCTGCTGAAATACGGCCCGAGCGTGCCGGTGCAGGAGCCCAGCGGACGGCTGTTCCTGGTGGTGCCGCGCTTCGGCACCATCTCGCCGTGGTCGAGCAAGGCCTCCGATATCGCCCGCAACTGCGGCCTGGCGAAGATCGACCGGCTGGAGCGCGGCATTGCCTACTATGTGCAGGGCGAACTGTCCGAGAGCGACGCCCAGCAGGTCGCCGCCCGCCTGCATGACCGCATG…	ATGAGTGGCCGCTCCGCTGGTTTCGCCCTGCCCAGCCGCGACGAGTGGCGGCGCGCGCTGGCCGAGTGGGCGCGCAGCGACGGGGCGACCTGGATCTACGTGTTCAAGGTGCTCTGCGCGGCCTTCCTGACCCTCTGGCTGGCGATGCGCCTGGAATTGCCGCAGCCGAGCACGGCGACCATCACCGTGTTCATCGTCATGCAGCCGCAGAGCGGCCAGGTGTTCGCCAAGAGCTTCTACCGCATCCTCGGCACCCTGGTCGGCCTCAGCGTGATGGTCACCCTGATCGCCCTGTTCGCCCAGGAGCGAGTGCTGTTCCTGCTCAGCTCGGCGATCTGGATCGGCCTCTGCACCGCCGGGGCCGCCCGCTACCGTGACTTCCGCTCCTACGCCTGCGTG…	ATGAGCGAATCTCTCGATCTGAGCCTGGAAGGGGTCGAACGCCGGTCGTTGGCCGAGTTCACCGAGCAGGCCTATCTGAACTATTCCATGTACGTGATCATGGACCGCGCCCTGCCGCATATCGGCGACGGCCTGAAACCGGTGCAGCGACGCATCGTCTACGCCATGAGCGAACTGGGGCTGGATGCCGATTCCAAGCACAAGAAGTCGGCGCGCACCGTCGGCGACGTGCTCGGCAAGTTCCACCCGCACGGCGACTCGGCCTGCTACGAGGCCATGGTGCTGATGGCGCAGCCGTTCTCCTATCGCTATCCGCTGGTGGACGGCCAGGGCAACTGGGGGGCGCCGGACGATCCCAAGTCCTTCGCCGCCATGCGTTATACCGAGGCGCGCCTGTCG…	ATGTCTTCACGCAAGATCGGGCTCAACCTGGTGGTCATCGTCGCCCTGGCCGCCCTCTTCACCGGCATCTGGGCCCTGTACAACCGTCCGGTCAGCGTACCGGACTGGCCGGAACGCATCTCCGGCTTCTCCTTATCGCCGTTCCGCCTCAACCAGAACCCGCAGAGCGGCCGCTACCCCAGCGCCGAACAGATGCGCACCGACCTGGAACTGGTCGCCCGGCACACCCACAGCATCCGCACCTATTCGGTCCAGGGCGCGCTCGGCGACATCCCGGCGCTGGCCGAGGCGTTCGGCCTGCGCGTCAGCCTGGGCATCTGGCTCGGCCCGGACCTGGCCAGCAACGAGGCCGAGATCGCCCGCGCCATCCGCATCGCCAACGAGTCGCCGAGCGTGGTG…	ATGACCGCCATGCCCGAAGTACTTCGCGAAGATACGCTGAACATCCCCGACAGCCGTGGGCTGAATCTCTACACCTGCGATCCGGCCCTGGAGCGGCTGCTGGAGGTATACCTGCCGCTGGCGTTGCTCGCCGAATGGCGGCCGCTCCTCGAACGGCTCGGCGCCCGTGCCGGCGGCGAGCTGGACGTGCTGGCGCTGGCGGCGGACAAGAACCCGCCGGTGCTGGCGCCGCGCACCCGCCGCGGCGAGGATTTGCAGAGCATTCGCAAGCATCCGGACTACGTCGCCCTCGAACGGGTGGCCTATGCCGAACTCGGCCTGGCTTCCATGAGCCATCGCCCGGACGGCCCGCCGCCGCTGGTCAAGTATGCGCTCACCCACCTGTTCGTACAGGCCGAG…	ATGTCCGAATTCTTCATCAAGCGGCCGAACTTCGCCTGGGTGGTGGCCCTGTTCATCTCCCTGGCCGGCCTGCTGGTCATTTCCAAATTGCCGGTAGCGCAGTACCCCAATGTCGCGCCGCCACAGATCACCATCACCGCCACCTATCCCGGCGCCTCGGCGAAGGTGCTGGTGGACTCCGTCACCAGTGTGCTCGAGGAGTCGCTGAACGGCGCCAAGGGCCTGCTCTACTTCGAGTCGACCAACAACTCCAACGGCACCGCCGAGATCGTCGTCACCTTCGAGCCGGGCACCGATCCGGACCTGGCCCAGGTGGACGTGCAGAACCGCCTGAAGAAAGCCGAGGCGCGCATGCCGCAGGCGGTGCTGACCCAGGGCCTGCAGGTCGAGCAGACCAGC…	ATGAGCCAGCAGCAGATGCCCGTGGCCCTCGATCCGCTGGACTTCCCGTTGCACGGCAGCCGCCTGATCGAGGCCAGCGCCGGTACCGGCAAGACGTTCACCATCGCCCTGCTATACGTACGCCTGGTCCTCGACCATGGCGGCGAGAACGCTTTCGGCCGGCCGCTGAGCCCGCCGGAAATCCTCGTGGTGACCTTCACCGATGCGGCGACCCAGGAACTCCGCGAGCGTATCCGCAGCCGCCTGGGCGAAGCGGCGCGTTGTTTCGCCGAGCCGCAGGAGCGCCACGACGGCCTGCTGGTCGCGTTGCGCCAGCAGTATCCCGCCGAGCGCTGGCCGGGCTGCGCGCGCCTGCTGCGCCTGGCCGCGGAGTGGATGGACGAGGCCGCGGTATCGACC…	ATGAGGCGCGCCAGCCTGCATATGTTGCTCTGCCAGTTCGCCATGGCCCTGGGCCTGCTCCTGAGCCTGGGCAGCGAGGCCTGGGCCGCCAGGCCGGCTCCGCAGGCGGCCGTCGACCTGGAAGCGCCGCCCGCCCTGGCCGAGGACGCCAGCCTCGACCAGCTCAACGCGCAACTCGACCTGATCCGCCAGCGCGTTACCGCCGACGCCAGCGACGACCTCCTCGCCGAGTTGCGCCAGAGCGCGCTGCAAGTCCAGCGCCAGGCCGACGCCCTGCTCGCGCTACGGGTGGCCGACATCGAGCGGCTCGACGATCAGTTGAAAGTGATCGGCCCGCCGCAGCCCGACGAGGCGGAAAGCCTCGCCGCCCAGCGCCAGGCCCTGACCCGGCAGAAGAAC…	CTGCTGTTCGCCGCAGTGGTCATCGGCTTCCCCCAGCGCGCCGGCGAATGGCTGCTGGCCGCGCAGACCTGGGCCTCGCAGACCGTCGGCTGGTACTACCTGCTGGCGATGACGCTGTACCTGATCTTCGTGGTGGTCACCGCGCTTTCCGGCTACGGCAAGATCAAGCTCGGTGCCGACCACGACGAGCCGGAATTCAGCTACCTGTCCTGGGCCGGCATGCTGTTCGCCGCAGGCATCAGCATCACCCTGTTCTTCTTCTGCGTATCCGAACCGCTGACCCACTTCCTCCAGCCGCCGCAAGGCGAGGCCGGTACCCAGGAAGCCGCGCGGCAGGCCATGGAACTGCTGTTCCTGCACTGGGGCCTGCACGGCTGGGGCGTGTTCGCCCTGGTGGCG…	ATGGTCCAGGGCACCACCTCGGACGCCGGCAAGAGCACCCTGGTGACCGCGCTGTGCCGCTGGCTGGCCCGGCGCGGCGTCGCGGTGGTGCCGTTCAAGCCGCAGAACATGGCGCTGAACAGCGCGGTCACCGCCGACGGCGGCGAGATCGGCCGCGCCCAGGCGGTCCAGGCCCAGGCCTGTCGGCTGGCGCCGCACACCGACATGAACCCGGTGCTGCTCAAGCCGAACACCGACATCGGCGCCCAGGTGATCATCCATGGCCGCGCGGTGACCAGCATGGACGCCGCCGCCTACCACGACTACAAGCGCGTGGCGATGGAAGCGGTGCTGGCTTCCCATGGGCGGCTCGCCGCCGCCTACCGGGTGGTGATGGTGGAGGGCGCCGGCTCGCCGGCG…	ATGGCCAGCCTGTTCCTCGGTCGCAAGGAAATCGACGACGACCTGCTCGACGACATCGAGACGCGCCTGCTGACCGCCGACGTCGGCGTCGAGGCCACCACCCTGATCGTGCAGAACCTGACCAAGCGCGTGGCGCGCAAGGAGCTGGCCGACAGCGGCGCGCTGTACAAGGCGCTGCAGGAAGAGCTGGCCAGCCTGCTGCGCCCGGTGGAGCAGCCGTTGCAGGTCGACGTCGCGCGCGAGCCCTATGTGATCCTGGTGGTCGGGGTGAACGGCGTGGGCAAGACCACCACCATCGGCAAGCTGGCGAAGAAGCTGCAACTCGAGGGCAAGAAGGTCATGCTGGCCGCCGGCGACACCTTCCGCGCTGCCGCCGTGGAGCAGTTGCAGGTCTGGGGC…	TTGCGTATCGAGAACTTCGCGCCCATCGACAGCCAGGGTTTCCGTTTCCTGCTCCGGCCGGGGGATGAGCCTCTGCTCGCGGTCCTCGATCGAGCCCTGCCGCGTATCAATGGGCGCTACGGCGACGAACTGTTGCGCAGTTGGAGCGCCGGGCGGCGCCTGCGTTTCGACGATCCCAGGGTGACGCTTGCGCCGGCGGAACAGCGTTGGCTCTCCACGCATCCGGTCGTGCCGGTGGTAATCAACCATTCCCTTGGCGCGCTCGGGCAACTGGATAGCGAGGGGCGGCTGAGCGGTATCGGGCGTGACTATCTGGACCTGATCGGCAAGCGCAGCGGCCTGCAGTTTTCCTTCAGCGGAGCCCGAAACTTCGTCGAGGCGAAACGTCGACTGGATGCG…	CGAGCCACCGCCCGCAGACGACTACTACGAAGTCGACATGGATACCCTGGCCTACCTGGATGCCGCGCCCGAGCCTGACGTGGTCGTGGTGGAGGAGCCGCTGCCGGCGGCGAAGCCGGCCACCGGCCTGGCCGCGGAGTGGCTGGATCTGTTCCCGCGGCTCGGCCTCGGCGGCCTGACCGCCAGCATCGGTGCCAACTGTACGCTGGTAGCTGCCGACGGCGACCACTGGCATCTGCATCTCGATCCGGGCCAGAGCGCGCTGTTCAACGCCACCCAGCAGCGGCGGCTGAACGATGCGCTGAACCAGCACCTGGGGCGCACCCTCAAACTGGAGGTGACCCTGCAGAAGCCTGAGCAGGAGACCCCGGCTCAGGCAGCGGCACGCCGGCGTGCCGA…	ATGTCGCAGACGCCGTCCCTCGCCCAGCTCCAGCCCGCCGATGCCTTCCTGCGCCGCCACCTCGGCCCCGATCCGGCGGAACAGCAGGCCATGCTGGACTTCCTCGGAGTTTCCACTCGCGCCGAACTGATCGTGCAGACGGTGCCGCCGGCGATCCGCCTCAACCGGCCGCTGGAACTGCCCGTCGCGCTCGACGAACAGGCCGCCCTGGCGCGCCTGCGCGGCTACGCCGGGCTCAACCAGCGCTGGACCAGCCTGATCGGCATGGGCTACTACGGCACAGTGACGCCGCCGGTGATCCTCCGCAACGTGCTGGAGAATCCCGGCTGGTACACCGCCTATACGCCCTACCAGCCGGAAATCGCCCAGGGCCGCCTGGAAGCGCTGCTGAATTTCCAG…	GTGATTCTCGCCGACGAGCAGGAAGAGTTCGGCGGCAGCCTGCTGGACACCCGCGAGACCCTCGACGGCAAGCCCGCCGCCGAGTGGGTCGCGGACGCCGTGGCCGAGCTGCAAGGCCTGCCGGAAGTCATCCTGCTACCGCGCTCCACGGTCAACGGCTACCACGACCACAACTTCCTCACCATCCACGAGCGGCGCACCGACCACCTCGGCGAGGTCGCCCCGCTCGGCCAGGTCCGCCAGCGCGTGCACCGCGTACGCGCCAAGCGCGTGGTACTGGCCGCCGGCGCCCATGAGCGTCCGCTGGTCTACGGCAACAACGACCTGCCCGGCAACATGCTCGCCGGCGCGGTTTCCACCTATGTACGGCGCTACGGCGTGGCACCGGGCAAGAAACTG…	GTGCGCAGCTATCTCGAATGGCTGCTGGACAACCACTTCACCTTCCTCGGCTACGAGGAATTCAGCGTCGCCGACGAGGCCGACGGCGGGCGCATGGTCTACGACGAGAAATCCTTCCTCGGCCTGACCCGTCTGCTGCGTGCCGGCCTGAGCAAGGATGACCTGCACATCGAGGACTATGCCGTCGCCTACCTGCGCGAACCGGTCCTGCTGTCCTTCGCCAAGGCTGCCCATCCGAGCCGCGTGCACCGCCCGGCCTACCCGGACTACGTGTCGATCCGCGAGCTGGACGGCAAGGGCCGGGTGATCCGCGAGTGCCGCTTCATGGGCCTGTTCACCTCCTCGGTGTACAACGAGAGCGTCAACGACATTCCCTTCATCCGCGGCAAGGTCGCCGAA…	GTGTACGGCGAATATTCTCGGGAAAGCATTGTCTGCCTGCTCGCCATACTATTATCCGGCCATCACTACTTATATATAGACCTGAAACAACCGGCGGCCTGGAATGCAGAGTTGTGCCGGCAGGTCGACTGCCGCCTGATCCTCGACTGCTCGACCACGCCGACGCCCGCCAACGGTCTTCCCTGCGTCCCGGTCAGGCACCTGCCTGCCGCTCCAGCCTCGGTCGCCCGGCCATGCTTCGCGGCGGACCAGATCGCCTACATCAACTTCTCCTCGGGCACCACCGGCCGCCCGAAAGCCATCGCCTGCACCCACGCCGGCATTACCCGTCTGTGCCTGGGCCAGTCGTTCCTCGCGTTCGCTCCGCAGATGCGCTTCCTGGTGAACTCGCCGCTGACC…	CTGCTGGAAGAAGGTGCGGACGAGGTATTCGAGGAAATCCTCGCCGCCGCTACGTCCTACTTCCAGACACCCATCGCGCTCATTTCCATCCTCGACCATCAGCGCCAGTGGTTTCGCGCGAGCATCGGCCTCGATATCCGGCAGACGCCGCGACGGGATTCGTTCTGCGCCTATGCGATCCTGGGCAAGGGAGTCTTCGAGGTGGCCGACGCCACCCTCGACCCGCGCTTCCGGGACAACCCCTATGTGCAAGGCGAACCGCGCATCCGCTTCTACGCCGGGGCTCCGCTGGCCACCGCGGAAGGTCTCAACCTCGGCAGCCTCTGCGTCATCGACCGGGAACCACGCGGGCCGCTGGCCGAGCGGGACGTCGCCATGCTCGAGCACTTCGCCCGGCTG…	ATGTCCCTGAGTGTCTTCGATCTGTTCAAGATCGGCATCGGGCCGTCCAGCTCCCACACCGTGGGGCCGATGCGTGCCGCCGCGCGCTTCGCCGAGGGGCTGAGGCGCGAGGGGTTGCTGGAGGCCACTGCCAGCGTCAAGGTCGAGCTGTACGGCTCGCTCGGCGCCACCGGCAAGGGCCACGGCAGCGACAAGGCGGTACTGCTCGGCCTGGAGGGCGAGCAGCCGGACACGGTGGATACCGCCGCGATTCCCGCTCGGCTCGATGCCATCCGTTCCAGCGGCGAGCTGCGCCTGCTCGGCGAGCGGCCGATCCGCTTCGTCGAGAAGGAACACCTGGCGCTGATCCGCAAGCCGCTGGCCTACCATCCCAACGGCATGATCTTCCGTGCCTTCGAC…	ATGAACAGAGTTTTCCTGACCCCGGCAGCCGTGGCGCTGTGCGGCGCGTCTTCCCTGAGCCTGGCCGAACCGGTCAGCCTTGCCGACCAGGTGGTGACCGCCACCCGTACCGCCCAGACCGCTTCCCAGAGCCTGGCGGCGGTGAGCGTCATCGACCGCGAGGATATCGAGCGCAGCCAGGCGCGCAGCGTGCCGGAGCTGTTGCGCCAGGTACCCGGCGTGTCGCTGGCGAACAACGGCGGTTTCGGCAAGAACACCACGCTGTTCCTGCGCGGCACCGAGTCCGACCATGTGCTGGTGCTGATCGACGGCATCAAGGTCGGCTCGGCCAGCGCTGGCCTCACCGCGTTCCAGGACTTGCCGGTGGAGCTGATCGAGCGCATCGAGGTGGTCCGCGGG…	GTGCGGGTGCTCAACTGGAGCTGGGGCATCCACCGCGTCGGCGCTCGCGACGTCGATGGCGACGAGGTGGATTCGCTGGTGCGCTCGGGGATCGCCATGAGCGGCTACGAGGAGTTGCTCGAGGAGTTCTTCCTCTGGCTGCGCAAGGAGCATCCGGACGTGCTGGTGGTCAACTCCGCCGGCAACGGCTCGTCCTACTCCGGTACCGACGAATACCGCCTGCCGTCCTCCTTCGTCACCGAGCAGTTGTTGGTGGTGGGCGGCCACCAGCGCAGCGAGCGCCAAGGCCTGGCGGTGGACGACCCGGCCTACGCGGTCAAGCGCAGCACCTCGAACGTCGACATGCGGGTGGATGTCACCGCCGCCGCCTGTACCCATGCCTCGACCCTGGAGCGGGAC…	TTGCAGGCAGCTTGCGCGTTCGGCCCGCCCGGGCGGCTATTCCGCGCCTGCGACGAGCAAGGACGCGAGGCGTTGCTGCTGCTCGCGGCGGTCGATGCCGACGAAGCGTTCTGGCAGCGCGAATGGGCATTGCGGCGCTGCCGTGCGGAGAGCCTGCCGCGAGTATTGTCGTCGCCCCGGTTGCGTCGTCATGCCTTCCAGTTGTTCGCTCCGCCGCGCTGGCCGATGCGCAGCCTGCTGGATTGGGCGCCAGCGCACCTGCCGCTGGAACCGCAATGCGCGCTGGTCCTCCTGGAGCAACTTATCGATGCGGTTCGCGCCTTGCAGCGGCGCGGCGTACAGGGCTTGTGGCTGGCGCCGCGGCAGATCCTGCTGGACGAGGGCGGGCGCCTGCTGTTC…	ATGTTCAACCCGGCCAACCAGACCCACTTCAGCCTCAGCCTCGACGGCCTCCGTCACGACCTGCAGGTTCTCGAATTCAGCGGCCACGAAGGCATCAGCCGGCCCTACCGCTTCGAACTCGAACTGGTCAGCGAGCGCGCCGGCCTCGACCTCGAAGCACTCATGCACCGACCCGCCTTCCTCGCCTTCACCCCGCAGGGCCAGGGTGTCCACGGCCTGGTCTACGGCGCTGCCCAGGGCGATGCCGGCAAGCGCCTGACCCGCTATCGCCTCACCCTCGTCCCACACCTGGCCTACCTCGCCCAGCGCAACAACCAGCGGATCTTCCAGCACCTCACGGTGCCGCAGATCGTCGCCCTGATCCTCGAGGAGCACGGCATCCTCGCCGACGCCTACCGC…	GTGGCTCTCCATCGCCTGGCCTTTATCTTCCTGTGCCTGCCCCTCATGGCCAGCGCCGCCCCCTTCACCTCCCCCGGTGACCGCGACCTGATCCGCGACCGCCAGCAGCGCCTGCTGGACGAACAGCGCAAGCGCCTGGAGGAACTCCAGCAACTGCCCGGCAAGGGAGCGCCCGCCGCTGCGGATGCCTCCGGCGGCGACGAGCGCTGCTTCGAGATCCGCCGCATCGAGCTGGAAGGCGCCGGGCACCTCGGCGAAAGCGCGCGTCGCCAGTTGCTGGCGCCCTACCAGGGGCGCTGCCTGGGCGTCGGCCAGCTCAATGCGCTGCTCAAGGCCGTCACCGACCATTACCTGGATCGCGGCTACGTCACCACCCGTGCCTACCTGCCACAGCAGGAC…	ATGGGTGACCGGCACGACTACGTCGCTCTGGAATGGGTGAAAGGCGAGATCGCCGAAACCCTGAAACAGGCGCGCCAGGCGCTGGAAGCGTTCGTCGAGAACCCGCAGGACCCGACCCGCATGCGGTTCTGCCTGACCTACGTGCACCA---GGTGCAGGGCACCCTGCAGATGGTCGAGTTCTACGGCGCGGCCCTGCTCGCCGAGGAAATGGAGCAGTTGGTCCAGGCCTTGCTGGACGGCCGCGTGCCGAACCAGGGCGAGGCCCTGGAAGTGCTGATGCAGGCGATCCTGCAACTGCCGGTCTACCTCGACCGGATCCAGACCGCCCGGCGCGACCTGCCGATGGTGGTCCTGCCGCTGCTCAACGACCTGCGCGCCGCGCGCGGCGAGAAGCTG…
6	ATGACCTTCGACGCCGCGTTCCAGCAGCTCGGCGAGCGGATGGCCGGCGGGGCCCTGGCGGAAACGGCGCTGGCGCCGTTCACCCATCTGCTGATTGACGAGTTCCAGGATGTCTCGCCGCAGATCGTCCTCTGGCTACAGGCGTTGCACCGTCGCCTGGCGA---CCCAGGGCACCGCGCCGAGCCTGATGGCCATCGGCGACGACTGGCAGTCGATCTACGGCTGGCGCGGCAGTTCGCCGGAGCTGTTCATCGACTTCGACCGGCACTTCCCCTCGCGTGGGCGGGGACGCAAGAGCGCGCTGCTGGTGCTGGAAACCAACTACCGCTCCGTCGAACCGATCATTCGCGACGGCGAGAAGGTGCTGGCCGGGGTGCGTTTCAAGCAGGACAAGACC…	ATGCACCTGTTGCGCACCCAACCCGGCGGCTTCGTTCCCGACGACGGCATCGCCCACCTGGCCCAGACTCCCGCCGAGCTGGTGATCCTCTGCAGCGGCGATTCGCACCTCGCATTGCTGGCCGAGGCCGCCCGTGCGCTGCCGGACGACTACCCGAGCCTGCGCCTGGCCAACCCCATGCAGTTGCAGAACCACGCCTCGGTGGACCTCTACGTCGAGGAAGTGCTGCGGCACGCGCGGGTGATCCTGCTTTCGCTGCACGGCGGCATCGGCTACTGGCGCTACGGCGTGGAGCAACTGGTGGCGCTGGCCGAGCGCGGCGCGCTGCTGATCCCGGTGCCCGGCGACGACCGCCCCGACCCGGAGCTGAGCGCCCTCGGCAACCTGCCGGCGGAGCAG…	ATGTTCGAACGCATCATCCAATTCGCCATCGAGCAACGCTGGCTGGTCCTGCTGGCGGTGCTGGGGATGGCCGGGGTCGGCATCGGCAGCTACCAGAAGCTGTCCATCGACGCGGTCCCGGACATCACCAACGTCCAGGTGCAGATCAATACCGCCGCCCCCGGCTACTCGCCGCTGGAAGTGGAGCAGCGGATCACCTACCCGGTGGAGACCGTCATGGCCGGCCTGCCGGGTTTGCAGGAAACCCGTTCGCTGTCGCGGCCGGGGATTTCCCAGGTGACGGTGATCTTCGAGGAGGGCACCGATATCTACTTCGCCCGCCAGCAGGTCAACGAACGCCTGAGCACGGCGCGCGAGCAACTGCCGGAAGACATCTCGCCGACCCTCGGGCCGATCTCC…	ATGTCCTTCAACCTTTCCGCCTGGGCGTTGCAGAATCGCCAGATCGTCCTGTACCTGATGATCCTGCTTGGCGCGGTCGGCGCGCTGTCCTACAGCAAGCTGGGGCAGAGCGAAGACCCGCCGTTCACCTTCAAGGCCATGGTGGTGCAGACCAACTGGCCGGGCGCCAGCGCCGAAGAGGTGGCCCGGCAGGTCACCGAGCGTATCGAGAAGAAGCTGATGGAAACCGGCGACTACGATCGCATCGTGTCCTTCTCCCGCCCCGGCGTCTCGCAGGTGACCTTCATGGCCCGCGAGGACATCCATTCCAGCGAGATCCCCGAACTCTGGTACCAGATCCGCAAGAAGATCAGCGACATTCGCGCCACCTTGCCGCAAAGCATCCAGGGCCCGTTCTTC…	ATGCGCACCGAGCAACCGAAAGTCATCCACCTCAAGGACTATCAGGCGCCGGACTACCTGATCGACGAGACCCACCTGAAGTTCGAACTGTTCGAAGACCACAGCCTGGTACACGCCGAGTTGAAGCTGCGGCGCAACCCCGAGCGCGGCGCCGGCCTGCCGCCGCTGTTGCTGCATGGCCAGCAACTGGAGCTGCTGGCGCTCGAACTGGACGGCCAGGCGCTCGGCGCGGACGACTACCAACTGGACGACGAGCAGCTCGGGGTGCAACCGCGGCAGGCCGAATTCGTCCTCAGGAGCACGGTGCGTATCCATCCGGAGAGCAACACTGCGCTGGAAGGCCTGTACAAGTCCGGCAAGATGTTCTGCACCCAGTGCGAGGCCGAGGGTTTCCGCAAG…	ATGACCGATAACCTGAACCTCGGCGCCATCGACCTGGGCACCGACGACGAATTCATCGCCCGCCATATCGGCCCGCGTGCCGCCGACACCCAGGCCATGCTCCAGCGCCTGGGCTACGACTCGCTGGACGCGCTGATCGGCAACGTGATCCCCGACAGCATCAAGGGCAGCAGCGTGCTCGACCTGCCGGCCGGCATGGGCGAGGCCGAGGCGCTGGCCAGCCTGAAGGCGATTGCCGCGCGCAATCGCGCGTTGCGTTCCTTCATTGGCCAGGGCTACTACAACTGCCACACCCCGGCACCGATCCTGCGCAACCTCCTGGAGAACCCGGCCTGGTACACCGCCTACACGCCGTACCAGCCGGAAATCTCCCAGGGCCGCCTGGAGGCGCTGCTGAAC…	GCAGGTTTCCCATGACGAGCTGGTCGCTCGCCTGTCCATGGTCGGCCTCGAGGTCGACGCCGACCTGCCGGTCGCCGGCGCCTTCAGCGGCGTGGTGGTCGGTGAGGTGCTCTCGACCGAACAGCATCCGGACGCCGACAAGCTGCGCGTCTGCCAGGTCAGCAACGGCAGCGAGACCTTCCAGGTCGTCTGCGGTGCGCCCAACGTGCGCGCGGGCCTGAAGATTCCCTTCGCCATGATCGGCGCCGAACTGCCGGGCGACTTCAAGATCAAGAAAGCCAAGCTGCGCGGCGTCGAGTCCTTCGGCATGCTCTGCTCGGCCAAGGAATTGCAGATCAGCGAAGAGAACGCCGGTCTGCTCGAGCTGCCGGCCGACGCGCCGGTCGGCCAGGACGTCCG…	ATGAGCGAGAACAACACGTACGACTCTTCCAGCATCAAGGTGCTGAAGGGGCTGGATGCCGTACGCAAGCGCCCCGGCATGTACATCGGCGACACCGACGATGGCACCGGTCTGCACCACATGGTGTTCGAGGTGGTGGATAACTCCATCGACGAAGCGCTGGCCGGTTATTGCAGCGAAATCAGCATCACCATCCATACGGATGAGTCGATCACTGTCCGCGACAATGGACGCGGTATTCCGGTGGATATCCACAAGGAAGAAGGGGTTTCTGCGGCGGAAGTGATCATGACCGTCCTCCACGCCGGCGGCAAGTTCGACGACAACACCTACAAGGTGTCCGGCGGCTTGCACGGTGTGGGCGTCTCGGTGGTGAACGCGCTGTCCCATGAACTGCGC…	ATGCTGATCCTGCGCGGCGCTCCCGCCCTTTCCGCTTTCCGCCACGGCAAACTGCTCGAGCAACTGACCCAGCACGTACCTGCCGTTACCGGGCTGTACGCTGAGTTCGCGCATTTCGCCGACGTCACCGGCGCGCTCACCGCCGACGAGGAGCAGGTGCTGGCGCGGCTGCTGAAATACGGCCCGAGCGTGCCGGTGCAGGAGCCCAGCGGACGGCTGTTCCTGGTGGTGCCGCGCTTCGGCACCATCTCGCCGTGGTCGAGCAAGGCCTCCGACATCGCCCGCAACTGCGGCCTGGCGAAGATCGACCGGCTGGAGCGCGGCATTGCCTACTATGTGCAGGGCGAACTGTCCGAGAGCGACGCCCAGCAGGTCGCCGCCCGCCTGCATGACCGCATG…	ATGAGCGGCCGCTCCGCTGGTTTCGCCCTGCCCAGCCGCGACGAGTGGCGGCGCGCGCTGGCCGAGTGGGCGCGCAGCGACGGGGCGACCTGGATCTACGTGTTCAAGGTACTCTGCGCGGCCTTCCTGACCCTCTGGCTGGCGATGCGCCTGGAATTGCCGCAGCCGAGCACGGCGACCATCACCGTGTTCATCGTCATGCAGCCGCAGAGCGGCCAGGTGTTCGCCAAGAGCTTCTACCGCATCCTCGGCACCCTGGTCGGCCTCAGCGTGATGGTCACCCTGATCGCCCTGTTCGCCCAGGAGCGAGTGCTGTTCCTGCTCAGCTCGGCGATCTGGATCGGCCTCTGCACCGCCGGGGCCGCCCGCTACCGTGACTTCCGCTCCTACGCCTGCGTG…	ATGAGCGAATCCCTCGATCTGAGCCTGGAAGGGGTCGAACGCCGGTCGTTGGCCGAGTTCACCGAGCAGGCCTATCTGAACTATTCCATGTACGTGATCATGGACCGCGCCCTGCCGCATATCGGCGACGGCCTGAAACCGGTGCAGCGACGCATCGTCTACGCCATGAGCGAACTGGGGCTGGATGCCGATTCCAAGCACAAGAAGTCGGCGCGCACCGTCGGCGACGTGCTCGGCAAGTTCCACCCGCACGGCGACTCGGCCTGCTACGAGGCCATGGTGCTGATGGCGCAGCCGTTCTCCTATCGCTATCCGCTGGTGGACGGCCAGGGCAACTGGGGGGCGCCGGACGATCCCAAGTCCTTCGCCGCCATGCGTTATACCGAGGCGCGCCTGTCG…	ATGTCTTCACGCAAGATCGGGCTCAACCTGGTGGTCATCGTCGCCCTGGCCGCCCTCTTCACCGGCATCTGGGCCCTGTACAACCGTCCGGTCAGCGTACCGGACTGGCCGGAACGCATCTCCGGCTTCTCCTTCTCGCCGTTCCGCCTCAACCAGAACCCGCAGAGCGGCCGCTACCCCAGCGCCGAACAGATGCGCGCCGACCTGGAACTGGTCGCCCGGCACACCCACAGCATCCGCACCTATTCGGTCCAGGGCGCGCTCGGCGACATCCCGGCGCTGGCCGAGGCGTTCGGCCTGCGCGTCAGCCTGGGCATCTGGCTCGGCCCGGACCTGGCCGGCAACGAGGCCGAGATCGCCCGCGCCATCCGCATCGCCAACGAGTCGCCGAGCGTGGTG…	ATGACCGCCATGCCCGAAGTACTTCGCGAAGATACGCTGAACATCCCCGACAGCCGTGGGCTGAATCTCTACACCTGCGATCCGGCCCTGGAGCGGCTGCTGGAGGTATACCTGCCGCCGGCGTTGCTCGCCGAATGGCGGCCGCTCCTCGAACGGCTCGGCGCCCGTGCCGGCGGCGAGCTGGACGTGCTGGCGCTGGCGGCGGACAAGAACCCGCCGGTGCTGGTGCCGCGCACCCGCCGCGGCGAGGATTTGCAGAGCATTCGCAAGCATCCGGACTACGTCGCCCTCGAACGGGTGGCCTATGCCGAACTCGGCCTGGCTTCCATGAGCCATCGCCCGGACGGCCCGCCGCCGCTGGTCAAGTATGCGCTCACCCACCTGTTCGTACAGGCCGAG…	ATGTCCGAATTCTTCATCAAGCGGCCGAACTTCGCCTGGGTGGTGGCCCTGTTCATCTCCCTGGCCGGCCTGCTGGTCATTTCCAAATTGCCGGTAGCGCAGTACCCCAATGTCGCGCCGCCACAGATCACCATCACCGCCACCTATCCCGGCGCCTCGGCGAAGGTGCTGGTGGACTCCGTCACCAGTGTGCTCGAGGAGTCGCTGAACGGCGCCAAGGGCCTGCTCTACTTCGAGTCGACCAACAACTCCAACGGCACCGCCGAGATCGTCGTCACCTTCGAGCCGGGCACCGATCCGGACCTGGCCCAGGTGGACGTGCAGAACCGCCTGAAGAAAGCCGAGGCGCGCATGCCGCAGGCGGTGCTGACCCAGGGCCTGCAGGTCGAGCAGACCAGC…	ATGAGCCAGCAGCAGATGCCCGTGGCCCTCGATCCGCTGGATTTCCCGTTGCACGGCAGCCGCCTGATCGAGGCCAGCGCCGGTACCGGCAAGACGTTCACCATCGCCCTGCTATACGTACGCCTGGTCCTCGACCATGGCGGCGAGAGCGCTTTCGGCCGGCCGCTGAGCCCGCCGGAAATCCTCGTGGTGACCTTCACCGATGCGGCGACCCAGGAACTCCGCGAGCGTATCCGCAGCCGCCTGGGCGAAGCGGCGCGTTGTTTCGCCGAGCCGCAGGAGCGCCACGACGGCCTGCTGGTCGCGTTGCGCCAGCAGTATCCCACCGAGCGCTGGCCGGGCTGCGCGCGCCTGCTGCGCCTGGCCGCGGAGTGGATGGACGAGGCCGCGGTATCGACC…	ATGAGGCGCGCCAGCCTGCATATGTTGCTCTGCCAGTTCGCCATGGCCCTGGGCCTGCTCCTGAGCCTGGGCAGCGAGGCCTGGGCCGCCAGGCCGGCTCCGCAGGCGGCCGTCGACCTGGAAGCGCCGCCCGCCCTGGCCGAGGACGCCAGCCTCGACCAGCTCAACGCGCAACTCGACCTGATCCGCCAGCGCGTTACCGCCGACGCCAGCGACGACCTCCTCGCCGAGTTGCGCCAGAGCGCGCTGCAAGTCCAGCGTCAGGCCGACGCCCTGCTCGCGCTACGGGTGGCCGACATCGAGCGGCTCGACGATCAGTTGAAAGTGATCGGCCCGCCGCAGCCCGACGAGGCGGAAAGCCTCGCCGCCCAGCGCCAGGCCCTGACCCGGCAGAAGAAC…	CTGCTGTTCGCCGCAGTGGTCATCGGCTTCCCCCAGCGCGCCGGCGAATGGCTGCTGGCCGCGCAGACCTGGGCCTCGCAGACCGTCGGCTGGTACTACCTGCTGGCGATGACGCTGTACCTGATCTTCGTGGTGGTCACCGCGCTTTCCGGCTACGGCAAGATCAAGCTCGGTGCCGACCACGACGAGCCGGAATTCAGCTACCTGTCCTGGGCCGGCATGCTGTTCGCCGCCGGCATCAGCATCACCCTGTTCTTCTTCTGCGTATCCGAACCGCTGACCCACTTCCTCCAGCCGCCGCAAGGCGAGGCCGGTACCCAGGAAGCCGCGCGGCAGGCCATGGAACTGCTGTTCCTGCACTGGGGCCTGCACGGCTGGGGCGTATTCGCCCTGGTGGCG…	ATGGTCCAGGGCACCACCTCGGACGCCGGCAAGAGCACCCTGGTGACCGCGCTGTGCCGCTGGCTGGCCCGGCGCGGCGTCGCGGTGGTGCCGTTCAAGCCGCAGAACATGGCGCTGAACAGCGCGGTCACCGCCGACGGCGGCGAGATCGGCCGCGCCCAGGCGGTCCAGGCCCAGGCCTGTCGGCTGGCGCCGCACACCGACATGAACCCGGTGCTGCTCAAGCCGAACACCGACATCGGCGCCCAGGTGATCATCCATGGCCGCGCGGTGACCAGCATGGACGCCGCCGCCTACCACGACTACAAGCGCGTGGCGATGGAAGCGGTGCTGGCTTCCCATGGGCGGCTCGCCGCCGCCTACCGGGTGGTGATGGTGGAGGGCGCCGGCTCGCCGGCG…	ATGGCCAGCCTGTTCCTCGGCCGCAAGGAAATCGACGACGACCTGCTCGACGACATCGAGACGCGCCTGCTGACCGCCGACGTCGGCGTCGAGGCCACCACCCTGATCGTGCAGAACCTGACCAAGCGCGTGGCGCGCAAGGAGCTGGCCGACAGCGGCGCGCTGTACAAGGCGCTGCAGGAAGAGCTGGCCAGCCTGCTGCGCCCGGTGGAGCAGCCGTTGCAGGTCGACGTCGCGCGCGAGCCCTATGTGATCCTGGTGGTCGGGGTGAACGGCGTGGGCAAGACCACCACCATCGGCAAGCTGGCGAAGAAGCTGCAACTCGAGGGCAAGAAGGTCATGCTGGCCGCCGGCGACACCTTCCGCGCCGCCGCCGTGGAGCAGTTGCAGGTCTGGGGC…	TTGCGCATCGAGAACTTCGCACCCATCGACAGCCAGGGTTTCCGTTTCCTGCTCCGGCCAGGTGACGAACCTCTGCTCGCGCTCATCGATCGCGCCCTGCCGCATATTAGCGGGCGCTACGGCGACGAACTGTTGCGCAGCTGGAGCGCCGGGCGGCGCCTGCGCTTCGACGAGCCCCGGGTGACGCTGTCGCCGGCGGAGCAGCGTTGGCTCTCCGCGCACCCGGTCGTGCCGGTGGTGATCAACCATTCCCTTGGCGCGCTCGGGCAACTGGATAACGAGGGGAGGCTGAGTGGTATCGGGCGTGACTATCTGGACCTGATCGGCAAGCGCAGTGGCCTGCGGTTTTCCTTCACTGGAGCACGCAACTTCGTCGAGACGAAAAGTCGACTGGATGCG…	CGAGCCACCGCCCGCGGACGACTATTACGAAGTCGATATGGATACCCTGGCCTACCTGGATGCCGCGCCCGAGCCTGACGTGGTCGTGGTGGAGGAGCCGCTGCCGGCGGCGAAGCCGGCCACCGGCCTGGCCGCGGAGTGGCTGGAGCTGTTCCCGCGGCTCGGCCTCGGCGGCCTGACCGCCAGCATCGGTGCCAACTGTACGCTGGTAGCTGCCGACGACGACCACTGGCATCTGCATCTCGATCCGGGCCAGAGCGCGCTGTTCAACGCCACCCAGCAGCGGCGGCTGAACGATGCGCTGAACCAGCACCTGGGGCGCACCCTCAAACTGGAGGTGACCCTGCAGAAGCCTGAGCAGGAGACCCCGGCCCAGGCAGCGGCACGCCGGCGTGCCGA…	ATGTCGCAGACGCCGTCCCTCGCCCAGCTCCAGCCCGCCGATGCCTTCCTGCGCCGCCACCTCGGCCCCGATCCGGCGGAACAGCAGGCCATGCTGGATTTCCTCGGAGTTTCCACTCGCGCCGAACTGATCGTGCAGACGGTGCCGCCGGCGATCCGCCTCAACCGGCCGCTGGAACTGCCCGCCGCGCTCGACGAACAGGCCGCCCTGGCGCGCCTGCGCGGCTACGCCGGGCTCAACCAGCGCTGGACCAGCCTGATCGGCATGGGCTACTACGGCACCGTGACGCCGCCGGTGATCCTCCGCAACGTGCTGGAGAATCCCGGCTGGTACACCGCCTATACGCCCTACCAGCCGGAAATCGCCCAGGGCCGCCTGGAAGCGCTGCTGAATTTCCAG…	GTGATCCTCGCCGACGAGCAGGAAGAGTTCGGCGGCAGCCTGCTGGACACCCGCGAGACCCTCGACGGCAAGCCCGCCGCCGAGTGGGTCGCGGACGCCGTGGCCGAGCTGCAAGGCCTGCCGGAAGTCATCCTGCTACCGCGCTCCACGGTCAACGGCTACCACGACCACAACTTCCTCACCATCCACGAGCGGCGCACCGACCACCTCGGCGAGGTCGCCCCGCTCGGCCAGGTCCGCCAGCGCGTGCACCGCGTACGCGCCAAGCGCGTGGTACTGGCCGCCGGCGCCCATGAGCGGCCGCTGGTCTACGGCAACAACGACCTGCCCGGCAACATGCTCGCCGGCGCGGTTTCCACCTATGTACGGCGCTACGGCGTGGCACCGGGCAAGAAACTG…	GTACGCAGCTATCTCGAATGGCTGCTGGACAACCACTTCACCTTCCTCGGCTACGAGGAATTCAGCGTCGCCGACGAGGCCGACGGCGGGCGCATGGTCTACGACGAGAAATCCTTCCTCGGCCTGACCCGTCTGCTGCGTGCCGGCCTGAGCAAGGATGACCTGCACATCGAGGACTATGCCGTCGCCTACCTGCGCGAACCGGTCCTGCTGTCCTTCGCCAAGGCTGCCCATCCGAGCCGTGTGCACCGCCCGGCCTACCCGGACTACGTGTCGATCCGCGAGCTGGACGGCAAGGGCCGGGTGATCCGCGAGTGCCGCTTCATGGGCCTGTTCACCTCCTCGGTGTACAACGAGAGCGTCAACGACATCCCCTTCATCCGCGGCAAGGTCGCCGAA…	GTGTACGGCGAATATTCTCGGGAAAGCATTACCTGCCTGCTCGCCATACTGTTATCCGGCCATCACTACTTATATATAGACCTGAAACAACCGGCGGCCTGGAATGCAGAGTTGTGCCGGCAGGTCGACTGCCGCCTGATCCTCGACTGCTCGACCACGCCGACGCCGGCCAACGGTCTTCCCTGCGTCCCGGTCAGGCACCTGCCTGCCGCTCCAGCCCCGGTCGCCCGGCCATGCTTCGCGGCGGACCAGATCGCCTACATCAACTTCTCCTCGGGCACCACCGGCCGCCCGAAAGCCATCGCCTGCACCCACGCCGGCATTACCCGCCTGTGCCTGGGCCAGTCGTTCCTCGCGTTCGCTCCGCAGATGCGCTTCCTGGTGAACTCGCCGCTGTCC…	CTGCTGGAAGAAGGTGCGGACGAGGTATTCGAGGAAATCCTCGCCGCCGCTACGTCCTACTTCCAGACGCCCATCGCGCTCATTTCCATCCTCGACCATCAGCGCCAGTGGTTTCGCGCGAGCATCGGCCTCGATATCCGGCAGACGCCGCGACGGGATTCGTTCTGCGCCTATGCGATCCTGGGCAAGGGAGTATTCGAGGTGGCCGACGCCACCCTCGACCCGCGCTTCCGGGACAACCCCTATGTGCAAGGCGAACCGCGCATCCGCTTCTACGCCGGGGCTCCGCTGGCCACCGCGGAAGGTCTCAACCTCGGCAGCCTCTGCGTCATCGACCGGGAACCACGCGGGCCGCTGGCCGAGCGGGACGTCGCCATGCTCGAGCACTTCGCCCGGCTG…	ATGTCCCTGAGTGTCTTCGATCTGTTCAAGATCGGCATCGGGCCGTCCAGCTCCCACACCGTGGGGCCGATGCGTGCCGCCGCGCGCTTCGCCGAGGGGCTGAGGCGCGAGGGGTTGCTGGAGGCCACTGCCAGCGTCAAGGTCGAGCTGTACGGCTCGCTTGGCGCCACCGGCAAGGGCCACGGCAGCGACAAGGCGGTACTGCTCGGCCTGGAGGGCGAGCAGCCGGACAAGGTGGATACCGCCGCGATTCCCGCTCGGCTCGATGCCATCCGTTCCAGCGGCGAGCTGCGCCTGCTCGGCGAGCGGCCGATCCGCTTCGTCGAGAAGGAACACCTTGCGCTGATCCGCAAGCCGCTGGCCTACCATCCCAATGGCATGATCTTCCGTGCCTTCGAC…	ATGAACAGAGTTTTCCTGACCCCGGCAGCCGTGGCGCTGTGCGGCGCGTCTTCCCTGAGCCTGGCCGAACCGGTCAGCCTTGCCGACCAGGTGGTGACCGCCACCCGTACCGCCCAGACCGCTTCCCAGAGCCTGGCGGCGGTGAGCGTCATCGACCGCGAGGATATCGAGCGCAGCCAGGCGCGCAGCGTGCCGGAGCTGTTGCGCCAGGTACCCGGCGTGTCGCTGGCGAACAACGGCGGTTTCGGCAAGAACACCACGCTGTTCCTGCGCGGCACCGAGTCCGACCATGTGCTGGTGCTGATCGACGGCATCAAGGTCGGCTCGGCCAGCGCCGGCCTCACCGCGTTCCAGGATTTGCCGGTGGAGCTGATCGAGCGCATCGAGGTGGTCCGCGGG…	GTGCGGGTGCTCAACTGGAGCTGGGGCATCCACCGCGTCGGCGCTCGCGACGTCGATGGCGACGAGGTGGATTCGCTGGTGCGCTCGGGGATCGCCATGAGCGGCTACGAGGAGTTGCTCGAGGAGTTCTTCCTCTGGCTGCGCAAGGAGCATCCGGACGTGCTGGTGGTCAACTCCGCCGGCAACGGCTCGTCCTACTCCGGTACCGACGAATACCGCCTGCCGTCCTCCTTCGTTACCGAGCAGTTGCTGGTGGTGGGCGGCCACCAGCGCAGCGAGCGCCAAGGCCTGGCGGTGGACGACCCGGCCTACGCGGTCAAGCGCAGCACCTCGAACGTCGACATGCGGGTGGATGTCACCGCCGCCGCCTGTACCCATGCCTCGACCCTGGAGCGGGAC…	TTGCAGGCAGCTTGCGCGTTCGGCCCGCCCGGGCGGCTATTCCGCGCCTGCGACGAGCAAGGACGCGAGGCGTTGCTGCTGCTCGCGGCGGTCGATGCCGACGAAGCGTTCTGGCAGCGCGAATGGGCATTGCGGCGCTGCCGTGCGGAGAGCCTGCCGCGAGTATTGTCGTCGCCCCGGTTGCGTCGTCATGCCTTCCAGTTGTTCGCTCCGCCGCGCTGGCCGATGCGCAGCCTGCTGGATTGGGCGCCAGCGCACCTGCCGCTGGAACCGCAATGCGCGCTGGTCCTCCTGGAGCAACTTATCGATGCGGTTCGCGCCTTGCAGCGGCGCGGCGTACAGGGCTTGTGGCTGGCGCCGCGGCAGATCCTGCTGGACGAGGGCGGGCGCCTGCTGTTC…	ATGTTCAACCCGGCCAACCAGACCCACTTCAGCCTCAGCCTCGACGGCCTCCGTCACGACCTGCAGGTCCTCGCCTTCAACGGCCACGAAGGCATCAGCCGGCCCTACCGCTTCGAACTCGAACTGGTCAGCGAGCGCGCCGGCCTCGACCTCGAAGCGCTCATGCACCGGCCCGCCTTCCTCGCCTTCACCCCGCAGGGCCAGGGTGTCCACGGCCTGGTCTACGGCGCTGCCCAAGGCGATGCCGGCAAGCGCCTGACCCGCTATCGCCTCACCCTCGTGCCGCAACTGGCCTACCTCGCGCAGCGCAGCAACCAGCGGATCTTCCAGCACCTCACGGTGCCGCAGATCGTCGCCCTGATCCTCGAGGAGCACGGCATCCTCGCCGACGCCTACCGC…	GTGGCTCTCCATCGCCTGGCCTTTATCTTCCTGTGCCTGCCGCTCATGGCCAGCGCCGCCCCCTTCACCTCCCCCGGCGACCGCGACCTGATCCGCGACCGCCAGCAGCGCCTGCTGGACGAACAGCGCAAGCGCCTGGAGGAACTCCAGCAACTGCCCGGCAAGGGAGCGCCCGCCGCTGCGGATGCCTACGGCGACGACGAGCGCTGCTTCGAGATCCGCCGCATCGAGCTGGAAGGCGCCGGGCACCTCGGCGAAAGCGCGCGTCGCCAACTGCTGGCGCCCTACCAAGGGCGCTGCCTGGGCGTCGGCCAGCTCAATGCGCTGCTCAAGGCCGTCACCGACCATTACCTGGATCGCGGCTACGTCACCACCCGCGCCTACCTGCCACAGCAGGAC…	ATGGGTGACCGGCACGACTACGTCGCTCTGGAATGGGTGAAAGGCGAGATCGCCGAAACCCTGAAACAGGCGCGCCAGGCGCTGGAAGCGTTCGTCGAGAACCCGCAGGACCCGACCCGCATGCGGTTCTGCCTGACCTACGTGCACCA---GGTGCAGGGCACCCTGCAGATGGTCGAGTTCTACGGCGCGGCCCTGCTCGCCGAGGAAATGGAGCAGTTGGTCCAGGCCTTGCTGGACGGTCGCGTGCCGAACCAGGGCGAGGCCCTGGAAGTGCTGATGCAGGCGATCCTGCAACTGCCGGTCTACCTCGACCGGATCCAGACCGCCCGGCGCGACCTGCCGATGGTGGTCCTGCCGCTGCTCAACGACCTGCGCGCCGCGCGCGGCGAGAAGCTG…
7	ATGACCTTCGACGCCGCGTTCCAGCAGCTCGGCGAGCGGATGGCCGGCGGGGCCCTGGCGGAAACGGCGCTGGCGCCGTTCACCCATCTGCTGATCGACGAGTTCCAGGATGTCTCGCCGCAGATCGTCCTCTGGCTACAGGCGTTGCACCGCCGCCTGGCGA---CCCAGGGCACCGCGCCGAGCCTGATGGCCATCGGCGACGACTGGCAGTCGATCTACGGCTGGCGCGGCAGTTCGCCGGAGCTGTTCATCGACTTCGACCGGCACTTCCCCTCGCGTGGGCGGGGACGCAAGAGCGCGCTGCTGGTGCTGGAAACCAACTACCGCTCCGTCGAACCGATCATTCGCGACGGCGAGAAGGTGCTGGCCGGGGTGCGTTTCAAGCAGGACAAGACC…	ATGCACCTGTTGCGCACCCAACCCGGCGGCTTCGTTCCCGACGACGGCATCGCCCACCTGGCCCAGACTCCCGCCGAGCTGGTGATCCTCTGCAGCGGCGATTCGCACCTCGCATTGCTGGCCGAGGCCGCCCGTGCGCTGCCGGACGACTACCCGAGCCTGCGCCTGGCCAACCCCATGCAGTTGCAGAACCACGCCTCGGTGGACCTCTACGTCGAGGAAGTGCTGCGGCACGCGCGGGTGATCCTGCTTTCGCTGCACGGCGGCATCGGCTACTGGCGCTACGGCGTGGAGCAACTGGTGGCGCTGGCCGAGCGCGGCGCGCTGCTGATCCCGGTGCCCGGCGACGACCGCCCCGACCCGGAGCTGAGCGCCCTCGGCAACCTGCCGGCGGAGCAG…	ATGTTCGAACGCATCATCCAATTCGCCATCGAGCAACGCTGGCTGGTCCTGCTGGCGGTCCTGGGGATGGCCGGGGTCGGCATTGGCAGCTACCAGAAGCTGTCCATCGACGCGGTCCCGGACATCACCAACGTCCAGGTGCAGATCAATACCGCCGCCCCCGGCTACTCGCCGCTGGAAGTGGAGCAGCGGATCACCTACCCGGTGGAGACCGTCATGGCCGGCCTGCCGGGTTTGCAGGAAACCCGTTCGCTGTCGCGGCCGGGGATTTCCCAGGTGACGGTGATCTTCGAGGAAGGCACCGACATCTACTTCGCCCGCCAGCAGGTCAACGAACGCCTGAGCACGGCGCGCGAGCAACTGCCGGAAGACATCTCGCCGACCCTCGGGCCGATCTCC…	ATGTCCTTCAACCTTTCCGCCTGGGCGTTGCAGAATCGCCAGATCGTCCTGTACCTGATGATCCTGCTTGGCGCGGTTGGCGCGCTGTCCTACAGCAAGCTGGGGCAGAGCGAAGACCCGCCGTTCACCTTCAAGGCCATGGTGGTGCAGACCAACTGGCCGGGTGCCAGCGCCGAAGAGGTGGCCCGGCAGGTCACCGAGCGTATCGAGAAGAAGCTGATGGAAACCGGCGACTACGATCGCATCGTGTCCTTCTCCCGCCCCGGCGTCTCGCAGGTGACCTTCATGGCCCGCGAGGACATCCATTCCAGCGAGATCCCCGAACTCTGGTACCAGATCCGCAAGAAGATCAGCGACATTCGCGCCACCTTGCCGCAAAGCATCCAGGGCCCGTTCTTC…	ATGCGCACCGAGCAACCGAAAGTCATCCACCTCAAGGACTATCAGGCGCCGGACTACCTGATCGACGAGACCCACCTGAAGTTCGAACTGTTCGAAGACCACAGCCTGGTACACGCCGAGTTGAAGCTGCGGCGCAACCCCGAGCGCGGCGCCGGCCTGCCGCCGCTGTTGCTGCATGGCCAGCAACTGGAGCTGCTGGCGCTCGAACTGGACGGCCAGGCGCTCGGCGCGGACGACTACCAACTGGACGACGAGCAGCTCGGGGTGCAACCGCGGCAGGCCGAATTCGTCCTCAGGAGCACGGTGCGTATCCATCCGGAGAGCAACACCGCGCTGGAAGGCCTGTACAAGTCCGGCAAGATGTTCTGCACCCAGTGCGAGGCCGAGGGTTTCCGCAAG…	ATGACCGATAACCTGAACCTCGGCGCCATCGACCTGGGCACCGACGACGAATTCATCGCCCGCCATATCGGCCCGCGTGCCGCCGACACCCAGGCCATGCTCCAGCGCCTGGGCTACGACTCGCTGGACGCGCTGATCGGCAACGTGATCCCCGACAGCATCAAGGGCAGCAGCGTGCTCGACCTGCCGGCCGGCATGGGCGAGGCCGAGGCGCTGGCCAGCCTGAAGGCGATCGCCGCGCGCAATCGCGCGTTGCGTTCCTTCATCGGCCAGGGCTACTACAACTGCCACACCCCGGCACCGATCCTGCGCAACCTCCTGGAGAACCCGGCCTGGTACACCGCCTACACGCCGTACCAGCCGGAAATCTCCCAGGGCCGCCTGGAGGCGCTGCTGAAC…	GCAGGTTTCCCATGACGAGCTGGTCGCTCGCCTGTCCATGGTCGGCCTCGAGGTCGACGCCGACCTGCCGGTCGCCGGCGCCTTCAGCGGCGTGGTGGTCGGCGAGGTGCTCTCGACCGAACAGCATCCGGACGCCGACAAGCTGCGCGTCTGCCAGGTCAGCAACGGCAGCGAGACCTTCCAGGTCGTCTGCGGTGCGCCCAACGTGCGCGCGGGCCTGAAGATTCCCTTCGCCATGATCGGCGCCGAACTGCCGGGCGACTTCAAGATCAAGAAAGCCAAGCTGCGCGGCGTCGAGTCCTTCGGCATGCTCTGCTCGGCCAAGGAATTGCAGATCAGCGAAGAGAACGCCGGTCTGCTCGAGCTGCCGGCCGACGCGCCGGTCGGCCAGGACGTCCG…	ATGAGCGAGAACAACACGTACGACTCTTCCAGCATCAAGGTGCTGAAGGGGCTGGATGCCGTACGCAAGCGCCCCGGCATGTACATCGGCGACACCGACGATGGCACCGGTCTGCACCACATGGTGTTCGAGGTGGTGGATAACTCCATCGACGAAGCGCTGGCCGGTTACTGCAGCGAAATCAGCATCACCATCCATACGGATGAGTCGATCACTGTCCGCGACAATGGACGCGGTATTCCGGTGGATATCCACAAGGAAGAAGGGGTTTCTGCGGCGGAAGTGATCATGACCGTCCTCCACGCCGGCGGCAAGTTCGACGACAACACCTACAAGGTGTCCGGCGGCTTGCACGGTGTGGGCGTCTCGGTGGTGAACGCGCTGTCCCATGAACTACGC…	ATGCTGATCCTGCGCGGCGCTCCCGCCCTTTCCGCTTTCCGCCACGGCAAACTGCTCGAGCAACTGACCCAGCACGTACCTGCCGTTACCGGGCTGTACGCTGAGTTCGCGCATTTCGCCGACGTCACCGGCGCGCTCACCGCCGACGAGGAGCAGGTGCTGGCGCGGCTGCTGAAATACGGCCCGAGCGTGCCGGTGCAGGAGCCCAGCGGCCGGCTGTTCCTGGTGGTGCCGCGCTTCGGCACCATCTCGCCGTGGTCGAGCAAGGCCTCCGACATCGCCCGCAACTGCGGCCTGGCGAAGATCGACCGGCTGGAGCGCGGCATTGCCTACTATGTGCAGGGCGAACTTTCCGAGAGCGATGCCCAACAGGTCGCCGCCCGCCTGCATGACCGCATG…	ATGAGCGGCCGCTCCGCTGGTTTCGCCCTGCCCAGCCGCGACGAGTGGCGGCGCGCGCTGGCCGAGTGGGCGCGCAGCGACGGGGCGACCTGGATCTACGTGTTCAAGGTGCTCTGCGCGGCCTTCCTGACCCTCTGGCTGGCGATGCGCCTGGAATTGCCGCAGCCGAGCACGGCGACCATCACCGTGTTCATCGTCATGCAGCCGCAGAGCGGCCAGGTGTTCGCCAAGAGCTTCTACCGCATCCTCGGCACCCTGGTCGGCCTCAGCGTGATGGTCACCCTGATCGCCCTGTTCGCCCAGGAGCGAGTGCTGTTCCTGCTCAGCTCGGCGATCTGGATCGGCCTCTGCACCGCCGGGGCCGCCCGCTACCGTGACTTCCGCTCCTACGCCTGCGTG…	ATGAGCGAATCCCTCGATCTGAGCCTGGAAGGGGTCGAACGCCGGTCGTTGGCCGAGTTCACCGAGCAGGCCTATCTGAATTATTCCATGTACGTGATCATGGACCGCGCCCTGCCGCATATCGGCGACGGCCTGAAACCGGTGCAGCGACGCATCGTCTACGCCATGAGCGAACTGGGGCTGGATGCCGATTCCAAGCACAAGAAGTCGGCGCGCACCGTCGGCGACGTGCTCGGCAAGTTCCACCCGCACGGCGACTCGGCCTGCTACGAGGCCATGGTGCTGATGGCGCAGCCGTTCTCCTATCGCTATCCGCTGGTGGACGGCCAGGGCAACTGGGGGGCGCCGGACGATCCCAAGTCCTTCGCCGCCATGCGTTATACCGAGGCGCGCCTGTCG…	ATGTCTTCACGCAAGATCGGGCTCAACCTGGTGGTCATCGTCGCCCTGGCCGCCCTCTTCACCGGCATCTGGGCCCTGTACAACCGTCCGGTCAGCGTACCGGACTGGCCGGAACGCATCTCCGGCCTCTCCTTCTCGCCGTTCCGCCTCAACCAGAACCCGCAGAGCGGCCGCTACCCCAGCGCCGAACAGATGCGCACCGACCTGGAACTGGTCGCCCGGCACACCCACAGCATCCGCACCTATTCGGTCCAGGGCGCGCTCGGCGACATCCCGGCGCTGGCCGAGGCGTTCGGCCTGCGCGTCAGCCTGGGCATCTGGCTCGGCCCGGACCTGGCCAGCAACGAGGCCGAGATCGCCCGCGCCATCCGCATCGCCAACGAGTCGCCGAGCGTGGTG…	ATGACCGCCATGCCCGAAGTACTTCGCGAAGATACGCTGAACATCCCCGACAGCCGTGGGCTGAATCTCTACACCTGCGATCCGGCCCTGGAGCGGCTGCTGGAGGTATACCTGCCGCCGGCGTTGCTCGCCGAATGGCGGCCGCTCCTCGAACGGCTCGGCGCCCGTGCCGGCGGCGAGCTGGACGTGCTGGCGCTGGCGGCGGACAAGAACCCGCCGGTGCTGGCGCCGCGCACCCGCCGCGGCGAGGATTTGCAGAGCATTCGCAAGCATCCGGACTACGTCGCCCTCGAACGGGTGGCCTATGCCGAACTCGGCCTGGCTTCCATGAGCCATCGCCCGGACGGCCCACCGCCGCTGGTGAAGTATGCGCTCACCCACCTGTTCGTACAGGCCGAG…	ATGTCCGAATTCTTCATCAAGCGGCCGAACTTCGCCTGGGTGGTGGCCCTGTTCATCTCCCTGGCCGGCCTGCTGGTCATTTCCAAATTGCCGGTAGCGCAGTACCCCAATGTCGCGCCGCCACAGATCACCATCACCGCCACCTATCCCGGCGCCTCGGCGAAGGTGCTGGTGGACTCCGTCACCAGTGTGCTCGAGGAGTCGCTGAACGGCGCCAAGGGCCTGCTCTACTTCGAGTCGACCAACAACTCCAACGGCACCGCCGAGATCGTCGTCACCTTCGAGCCGGGCACCGATCCGGACCTGGCCCAGGTGGACGTGCAGAACCGCCTGAAGAAAGCCGAGGCGCGCATGCCGCAGGCGGTGCTGACCCAGGGCCTGCAGGTCGAGCAGACCAGC…	ATGAGCCAGCAGCAGATGCCCGTGGCCCTCGATCCGCTGGACTTCCCGTTGCACGGCAGCCGCCTGATCGAGGCCAGCGCCGGTACCGGCAAGACGTTCACCATCGCCCTGCTATACGTACGCCTGGTCCTCGACCATGGCGGCGAGAACGCTTTCGGCCGGCCGCTGAGCCCGCCGGAAATCCTCGTGGTGACCTTCACCGATGCGGCGACCCAGGAACTCCGCGAGCGTATCCGCAGCCGCCTGGGCGAAGCGGCGCGTTGTTTCGCCGAGCCGCAGGAGCGCCACGACGGCCTGCTGGTCGCGTTGCGCCAGCAGTATCCCGCCGAGCGCTGGCCGGGCTGCGCGCGCCTGCTGCGCCTGGCCGCGGAGTGGATGGACGAGGCCGCGGTATCGACC…	ATGAGGCGCGCCAGCCTGCATATGTTGCTCTGCCAGTTCGCCATGGCCCTGGGCCTGCTCCTGAGCCTGGGCAGCGAGGCCTGGGCCGCCAGGCCGGCTCCGCAGGCGGCCGTCGACCTGGAAGCGCCGGCCGCCCTGGCCGAGGACGCCAGCCTCGACCAGCTCAACGCGCAACTCGACCTGATCCGCCAGCGCGTCACCGCCGACGCCAGCGACGACCTCCTCGCCGAGTTGCGCCAGAGCGCGCTGCAAGTCCAGCGCCAGGCCGACGCCCTGCTCGCGCTGCGGGTGGCCGACATCGAGCGGCTCGACGATCAGTTGAAAGTGATCGGCCCGCCGCAGCCCGACGAGGCGGAAAGCCTCGCCGCCCAGCGCCAGGCCCTGACTCGGCAGAAGAAC…	CTGCTGTTCGCCGCAGTGGTCATCGGCTTCCCCCAGCGCGCCGGCGAATGGCTGCTGGCCGCGCAGACCTGGGCCTCGCAGACCGTCGGCTGGTACTACCTGCTGGCGATGACGCTGTACCTGATCTTCGTGGTGGTCACCGCGCTTTCCGGCTACGGCAAGATCAAGCTCGGTGCCGACCACGACGAGCCGGAATTCAGCTACCTGTCCTGGGCCGGCATGCTGTTCGCCGCAGGCATCAGCATCACCCTGTTCTTCTTCTGCGTATCCGAACCGCTGACCCACTTCCTCCAGCCGCCGCAAGGCGAGGCCGGTACCCAGGAAGCCGCGCGGCAGGCCATGGAACTGCTGTTCCTGCACTGGGGCCTGCACGGCTGGGGCGTGTTCGCCCTGGTGGCG…	ATGGTCCAGGGCACCACCTCGGACGCCGGCAAGAGCACCCTGGTGACCGCGCTGTGCCGCTGGCTGGCCCGGCGCGGCGTCGCGGTGGTGCCGTTCAAGCCGCAGAACATGGCGCTGAACAGCGCGGTCACCGCCGACGGCGGCGAGATCGGCCGCGCCCAGGCGGTCCAGGCCCAGGCCTGCCGGCTGGCGCCGCACACCGACATGAACCCGGTGCTGCTCAAGCCGAACACCGACATCGGCGCCCAGGTGATCATCCATGGCCGCGCGGTGACCAGCATGGACGCCGCCGCCTACCACGACTACAAGCGCGTGGCGATGGAAGCGGTGCTGGCTTCCCATGGGCGGCTCGCCGCCGCCTACCGGGTGGTGATGGTGGAGGGCGCCGGCTCGCCGGCG…	ATGGCCAGCCTGTTCCTCGGTCGCAAGGAAATCGACGACGACCTGCTCGACGACATCGAGACGCGCCTGCTGACCGCCGACGTCGGCGTCGAGGCCACCACCCTGATCGTGCAGAACCTGACCAAGCGCGTGGCGCGCAAGGAGCTGGCCGACAGCGGCGCGCTGTACAAGGCGCTGCAGGAAGAGCTGGCCAGCCTGCTGCGCCCGGTGGAGCAGCCGTTGCAGGTCGACGTCGCGCGCGAGCCCTATGTGATCCTGGTGGTCGGGGTGAACGGCGTGGGCAAGACCACCACCATCGGCAAGCTGGCGAAGAAGCTGCAACTCGAGGGCAAGAAGGTCATGCTGGCCGCCGGCGACACCTTCCGCGCCGCCGCCGTGGAGCAGTTGCAGGTCTGGGGC…	TTGCGCATCGAGAACTTCGCACCCATCGACAGCCAGGGTTTCCGTTTCCTGCTCCGGCCAGGTGACGAACCTCTGCTCGCGCTCATCGATCGCGCCCTGCCGCATATTAGCGGGCGCTACGGCGACGAACTGTTGCGCAGCTGGAGCGCCGGGCGGCGCCTGCGCTTCGACGAGCCCCGGGTGACGCTGTCGCCGGCGGAGCAGCGTTGGCTCTCCGCGCACCCGGTCGTGCCGGTGGTGATCAACCATTCCCTTGGCGCGCTCGGGCAACTGGATAACGAGGGGAGGCTGAGTGGTATCGGGCGTGACTATCTGGACCTGATCGGCAAGCGCAGTGGCCTGCAGTTTTCCTTCACTGGAGCACGCAACTTCGTCGAGACGAAAAGCCGACTGGATGCG…	CGAGCCACCGCCCGCGGACGACTATTACGAAGTCGATATGGATACCCTGGCCTACCTGGATGCCGCGCCCGAGCCTGACGTGGTCGTGGTGGAGGAGCCGCTGCCGGCGGCGAAGCCGGCCACCGGCCTGGCCGCGGAGTGGCTGGAGCTGTTCCCGCGGCTCGGCCTCGGCGGCCTGACCGCCAGCATCGGTGCCAACTGTACGCTGGTAGCTGCCGACGACGACCACTGGCATCTGCATCTCGATCCGGGCCAGAGCGCGCTGTTCAACGCCACCCAGCAGCGGCGGCTGAACGATGCGCTGAACCAGCACCTGGGGCGCACCCTCAAACTGGAGGTGACCCTGCAGAAGCCTGAGCAGGAGACCCCGGCCCAGGCAGCGGCACGCCGGCGTGCCGA…	ATGTCGCAGACGCCGTCCCTCGCCCAGCTCCAGCCCGCCGATGCCTTCCTGCGCCGCCACCTCGGCCCCGATCCGGCGGAACAGCAGGCCATGCTGGATTTCCTCGGAGTTTCCACTCGCGCCGAACTGATCGTGCAGACGGTGCCGCCGGCGATCCGCCTCAACCGGCCGCTGGAACTGCCCGCCGCGCTCGACGAACAGGCCGCCCTGGCGCGCCTGCGCGGCTACGCCGGGCTCAACCAGCGCTGGACCAGCCTGATCGGCATGGGCTACTACGGCACCGTGACGCCGCCGGTGATCCTCCGCAACGTGCTGGAGAATCCCGGCTGGTACACCGCCTATACGCCCTACCAGCCGGAAATCGCCCAAGGCCGCCTGGAAGCGCTGCTGAATTTCCAG…	GTGATTCTCGCCGACGAGCAGGAAGAGTTCGGCGGCAGCCTGCTGGACACCCGCGAGACCCTCGACGGCAAGCCCGCCGCCGAGTGGGTCGCGGACGCCGTGGCCGAGCTGCAAGGCCTGCCGGAAGTCATCCTGCTACCGCGCTCCACGGTCAACGGCTACCACGACCACAACTTCCTCACCATCCACGAGCGGCGCACCGACCACCTCGGCGAGGTCGCCCCGCTCGGCCAGGTCCGCCAGCGCGTGCACCGCGTACGCGCCAAGCGCGTGGTACTGGCCGCCGGCGCCCATGAGCGGCCGCTGGTCTACGGCAACAACGACCTGCCCGGCAACATGCTCGCCGGCGCGGTTTCCACCTATGTACGGCGCTACGGCGTGGCACCGGGCAAGAAACTG…	GTGCGCAGCTATCTCGAATGGCTGCTGGACAACCACTTCACCTTCCTCGGCTACGAGGAATTCAGCGTCGCCGACGAGGCCGACGGCGGGCGCATGGTCTACGACGAGAAATCCTTCCTCGGCCTGACCCGTCTGCTGCGCGCCGGCCTGAGCAAGGATGACCTGCACATCGAGGACTATGCCGTCGCCTACCTGCGCGAACCGGTCCTGCTGTCCTTCGCCAAGGCTGCCCATCCGAGCCGTGTGCACCGCCCGGCCTACCCGGACTACGTGTCGATCCGCGAGCTGGACGGCAAGGGCCGGGTGATCCGCGAGTGCCGCTTCATGGGCCTGTTCACCTCCTCGGTGTACAACGAGAGCGTCAACGACATCCCCTTCATCCGCGGCAAGGTCGCCGAA…	GTGTACGGCGAATATTCTCGGGAAAGCATTACCTGTCTGCTCGCCATACTGTTATCCGGCCATCACTACTTATATATAGACCTGAAACAACCGGCGGCCTGGAATGCAGAGTTGTGCCGGCAGGTCGACTGCCGCCTGATCCTCGACTGCTCGACCACGCCGACGCCCGCCAACGGTCTTCCCTGCGTCCCGGTCAGGCACCTGCCTGCCGCTCCAGCCTCGGTCGCCCGGCCATGCTTCGCGGCGGACCAGATCGCCTACATCAACTTCTCCTCGGGCACCACCGGCCGCCCGAAAGCCATCGCCTGCACCCACGCCGGCATTACCCGCCTGTGCCTGGGCCAGTCGTTCCTCGCGTTCGCTCCGCAGATGCGCTTCCTGGTGAACTCGCCGCTGTCC…	TTGCTGGAAGAAGGTGCGGACGAGGTATTCGAGGAAATCCTCGCCGCCGCTACGTCCTACTTCCAGACGCCCATCGCGCTCATTTCCATCCTCGACCACCAGCGCCAGTGGTTTCGCGCGAGCATCGGCCTCGATACCCGGCAGACGCCGCGACGGGATTCGTTCTGCGCCTACGCGATCCTGGGGAAGGGAGTCTTCGAGGTGGCCGACGCCACCCTAGACCCGCGCTTCCGGGACAATCCCTATGTGCAAGGCGAACCGCGCATCCGCTTCTACGCCGGGGCTCCGCTGGCCACCGCGGAGGGTCTCAACCTCGGCAGCCTCTGCGTCATCGACCGGGAACCACGCGGGCCGCTGTCCGAGCGCGACATCGCCATGCTCGAGCATTTCGCCCGCCTG…	ATGTCCCTGAGTGTCTTCGATCTGTTCAAGATCGGCATCGGGCCGTCCAGCTCCCACACCGTGGGGCCGATGCGTGCCGCCGCGCGCTTTGCCGAGGGGCTGAGGCGCGAGGGGTTGCTGGAGGCCACTGCCAGCGTCAAGGTCGAGCTGTACGGCTCGCTCGGCGCCACCGGCAAGGGCCACGGCAGCGACAAGGCGGTACTGCTCGGCCTGGAGGGCGAGCAGCCGGACACGGTGGATACCGCCGCGATTCCCGCTCGGCTCGATGCCATCCGTTCCAGCGGCGAGCTGCGCCTGCTCGGCGAGCGGCCGATCCGCTTCGTCGAGAAGGAACACCTTGCGCTGATCCGCAAGCCGCTGGCCTACCATCCCAACGGCATGATCTTCCGTGCCTTCGAC…	ATGAACAGAGTTTTCCTGACCCCGGCAGCCGTGGCGCTGTGCGGCGCGTCTTCCCTGAGCCTGGCCGAACCGGTCAGCCTTGCCGACCAGGTGGTGACCGCCACCCGTACCGCCCAGACCGCTTCCCAGAGCCTGGCGGCGGTGAGCGTCATCGACCGCGAGGATATCGAGCGCAGCCAGGCGCGCAGCGTGCCGGAGCTGTTGCGCCAGGTACCCGGCGTGTCGCTGGCGAACAACGGCGGTTTCGGCAAGAACACCACGCTGTTCCTGCGCGGCACCGAGTCCGACCATGTGCTGGTGCTGATCGACGGCATCAAGGTCGGCTCGGCCAGCGCTGGCCTCACCGCGTTCCAGGACTTGCCGGTGGAGCTGATCGAGCGCATCGAGGTGGTCCGCGGG…	GTGCGGGTGCTCAACTGGAGCTGGGGCATCCACCGCGTCGGCGCTCGCGACGTCGATGGCGACGAGGTGGATTCGCTGGTGCGCTCGGGGATTGCCATGAGCGGCTACGAGGAGTTGCTCGAGGAGTTCTTCCTCTGGCTGCGCAAGGAGCATCCGGACGTGCTGGTGGTCAACTCCGCCGGCAACGGCTCGTCCTACTCCGGTACCGACGAATACCGCCTGCCGTCCTCCTTCGTCACCGAGCAGTTGCTGGTGGTGGGCGGCCACCAGCGCAGCGAGCGCCAAGGCCTGGCGGTGGACGACCCGGCCTACGCGGTCAAGCGCAGCACCTCGAACGTCGACATGCGGGTGGATGTCACCGCCGCCGCCTGTACCCATGCCTCGACCCTGGAGCGGGAC…	TTGCAGGCGGCTTGCGCGTTCGGCCCGCCCGGGCGGCTGTTCCGCGCCTGCGACGAGCAAGGACGCGAGGCGTTGCTGCTGCTCGCGGCGGCCGATGCCGACGAAGCGTTCTGGCAGCGCGAATGGGCACTGCGGCGCTGCCGTGCGGAGAGCCTGCCGCGAGTATTGTCGTCGCCCCGGTTGCGTCGTCATGCCTTCCAGTTGTTCGCTCCGCCGCGCTGGCCGATGCGCAGCCTGCTGGATTGGGCGCCAGCGCACCTGCCGCTGGAACCGCAATGCGCGCTGGTCCTCCTGGAACAACTTATCGATGCGGTTCGCGCCTTGCAGCGGCGCGGTGTACAGGGCTTGTGGCTGGCGCCGCGGCAGATCCTGCTGGACGAGGGCGGGCGCCTGCTGTTC…	ATGTTCAACCCGGCCAACCAGACCCACTTCAGCCTCACCCTCGACGGCCTCCGCCACGACCTGCAGGTCCTCGCCTTCAACGGCCACGAAGGCATCAGTCGCCCCTACCGTTTCGAACTCGAACTGGTCGGAGAGCGCGCCGGCCTCGACCTCGAAACGTTCCTCCACCGGCCCGCCTTCCTCTCCTTCACCCCGCAGGGCCAGGGTGTCCACGGCCTGGTCTACGGCGCTGCCCAGGGCGATGCCGGCAAGCGCCTGACCCGCTATCGCCTCACCCTCGTCCCGCACCTGGCCTACCTCGCCCAGCGCAACAACCAGCGGATCTTCCAGCACCTCACGGTGCCGCAGATCGTCGCCCTGATCCTCGAGGAGCACGGCATCCTCGCCGACGCCTACCGC…	GTGGCTCTCCATCGCCTGGCCTTTATCTTCCTGTGCCTGCCGCTCATGGCCAGCGCCGCCCCCTTCACCTCCCCCGGCGATCGCGACCTGATCCGCGACCGCCAGCAGCGCCTGCTGGACGAACAGCGCAAGCGCCTGGAGGAACTCCAGCAACTGCCCGGCAAGGGAGCGCCCGCCGCTGCGGATGCCTCCGGCGACGACGAGCGCTGCTTCGAGATCCGCCGCATCGAGCTGGAAGGCGCCGGGCACCTCGGCGAAAGCGCGCGTCGCCAGTTGCTGGCGCCCTACCAGGGGCGCTGCCTGGGCGTCGGCCAGCTCAATGCGCTGCTCAAGGCCGTCACCGACCATTACCTGGATCGCGGCTACGTCACCACCCGCGCCTACCTGCCACAGCAGGAC…	ATGGGTGACCGGCACGACTACGTCGCTCTGGAATGGGTGAAAGGCGAGATCGCCGAAACCCTGAAACAGGCGCGCCAGGCGCTGGAAGCGTTCGTCGAGAACCCGCAGGACCCGACCCGCATGCGGTTCTGCCTGACCTACGTGCACCA---GGTGCAGGGCACCCTGCAGATGGTCGAGTTCTACGGCGCGGCCCTGCTCGCCGAGGAAATGGAGCAGTTGGTCCAGGCCTTGCTGGACGGTCGCGTGCCGAACCAGGGCGAGGCCCTGGAAGTGCTGATGCAGGCGATCCTGCAACTGCCGGTCTACCTCGACCGGATCCAGACCGCCCGGCGCGACCTGCCGATGGTGGTCCTGCCGCTGCTCAACGACCTGCGCGCCGCGCGCGGCGAGAAGCTG…
8	ATGACCTTCGACGCCGCGTTCCAGCAGCTCGGCGAGCGGATGGCCGGCGGGGCCCTGGCGGAAACGGCGCTGGCGCCGTTCACCCATCTGCTGATCGACGAGTTCCAGGATGTCTCGCCGCAGATCGTCCTCTGGCTACAGGCGTTGCACCGTCGCCTGGCGA---CCCAGGGCACCGCGCCGAGCCTGATGGCCATCGGCGACGACTGGCAGTCGATCTACGGCTGGCGCGGCAGTTCGCCGGAGCTGTTCATCGACTTCGACCGGCACTTCCCCTCGCGTGGGCGGGGACGCAAGAGCGCGCTGCTGGTGCTGGAAACCAACTACCGCTCCGTCGAACCGATCATTCGCGACGGCGAGAAGGTGCTGGCCGGGGTGCGTTTCAAGCAGGACAAGACC…	ATGCACCTGTTGCGCACCCAACCCGGCGGCTTCGTTCCCGACGACGGCATCGCCCACCTGGCCCAGACTCCCGCCGAGCTGGTGATCCTCTGCAGCGGCGATTCGCACCTCGCATTGCTGGCCGAGGCCGCCCGTGCGCTGCCGGACGACTACCCGAGCCTGCGCCTGGCCAACCCCATGCAGTTGCAGAACCACGCCTCGGTGGACCTCTACGTCGACGAAGTGCTGCGGCACGCGCGGGTGATCCTGCTTTCGCTGCACGGCGGCATCGGCTACTGGCGCTACGGCGTGGAGCAACTGGTGGCGCTGGCCGAGCGCGGCGCGCTGCTGATCCCGGTGCCCGGCGACGACCGCCCCGACCCGGAGCTGAGCGCCCTCGGCAACCTGCCGGCAGAGCAG…	ATGTTCGAACGCATCATCCAATTCGCCATCGAGCAACGCTGGCTGGTCCTGCTGGCGGTGCTGGGGATGGCCGGGGTCGGCATCGGCAGCTACCAGAAGCTGTCCATCGACGCGGTCCCGGACATCACCAACGTCCAGGTGCAGATCAATACCGCCGCCCCCGGCTACTCGCCGCTGGAAGTGGAGCAGCGGATCACCTACCCGGTGGAGACCGTCATGGCCGGCCTGCCGGGTTTGCAGGAAACCCGTTCGCTGTCGCGGCCGGGGATTTCCCAGGTGACGGTGATCTTCGAGGAAGGCACCGACATCTACTTCGCCCGCCAGCAGGTCAACGAACGCCTGAGCACGGCGCGCGAGCAACTGCCGGAAGACATCTCGCCGACCCTCGGGCCGATCTCC…	ATGTCCTTCAACCTTTCCGCCTGGGCGTTGCAGAATCGCCAGATCGTCCTGTACCTGATGATCCTGCTTGGCGCGGTTGGCGCGCTGTCCTACAGCAAGCTGGGGCAGAGCGAAGACCCGCCGTTCACCTTCAAGGCCATGGTGGTGCAGACCAACTGGCCGGGCGCCAGCGCCGAAGAGGTGGCCCGGCAGGTCACCGAGCGTATCGAGAAGAAGCTGATGGAAACCGGCGACTACGATCGCATCGTGTCCTTCTCCCGCCCCGGCGTCTCGCAGGTGACCTTCATGGCCCGCGAGGACATCCATTCCAGCGAGATCCCCGAACTCTGGTACCAGATCCGCAAGAAGATCAGCGACATTCGCGCCACCTTGCCGCAAAGCATCCAGGGCCCGTTCTTC…	ATGCGCACCGAGCAACCGAAAGTCATCCACCTCAAGGACTATCAGGCGCCGGACTACCTGATCGACGAGACCCACCTGAAGTTCGAACTGTTCGAAGACCACAGCCTGGTACACGCCGAGTTGAAGCTGCGGCGCAACCCCGAGCGCGGCGCCGGCCTGCCGCCGCTGTTGCTGCATGGCCAGCAACTGGAGCTGCTGGCGCTCGAACTGGACGGCCAGGCGCTCGGCGCGGACGACTACCAACTGGACGACGAGCAGCTCGGGGTGCAACCGCGGCAGGCCGAATTCGTCCTCAGGAGCACGGTGCGTATCCATCCGGAGAGCAACACCGCGCTGGAAGGCCTGTACAAGTCCGGCAAGATGTTCTGCACCCAGTGCGAGGCCGAGGGTTTCCGCAAG…	ATGACCGATAACCTGAACCTCGGCGCCATCGACCTGGGCACCGACGACGAATTCATCGCCCGCCATATCGGCCCGCGTGCCGCCGACACCCAGGCCATGCTCCAGCGCCTGGGCTACGACTCGCTGGACGCGCTGATCGGCAATGTGATCCCCGACAGCATCAAGGGCAGCAGCGTGCTCGACCTGCCGGCCGGCATGGGCGAGGCCGAGGCGCTGGCCAGCCTGAAGGCGATCGCCGCGCGCAATCGCGCGTTGCGTTCCTTCATCGGCCAGGGCTACTACAACTGCCACACTCCGGCACCGATCCTGCGCAACCTCCTGGAGAACCCGGCCTGGTACACCGCCTACACGCCGTACCAGCCGGAAATCTCCCAGGGCCGCCTGGAGGCGCTGCTGAAC…	GCAGGTTTCCCATGACGAGCTGGTCGCTCGCCTGTCCATGGTCGGCCTCGAGGTCGACGCCGACCTGCCGGTCGCCGGCGCCTTCAGCGGCGTGGTGGTCGGCGAGGTGCTCTCGACCGAACAGCATCCGGACGCCGACAAGCTGCGCGTCTGCCAGGTCAGCAACGGCAGCGAGACCTTCCAGGTCGTCTGCGGCGCGCCCAACGTGCGCGCGGGCCTGAAGATTCCCTTCGCCATGATCGGCGCCGAACTGCCGGGCGACTTCAAGATCAAGAAAGCCAAGCTGCGCGGCGTCGAGTCCTTCGGCATGCTCTGCTCGGCCAAGGAATTGCAGATCAGCGAAGAGAACGCCGGTCTGCTCGAGCTGCCGGCCGACGCGCCGGTCGGCCAGGACGTCCG…	ATGAGCGAGAACAACACGTACGACTCTTCCAGCATCAAGGTGCTGAAGGGGCTGGATGCCGTACGCAAGCGCCCCGGCATGTACATCGGCGACACTGACGATGGCACCGGTCTGCACCACATGGTGTTCGAGGTGGTGGATAACTCCATCGACGAAGCGCTGGCCGGTTACTGCAGCGAAATCAGCATCACCATCCATACGGATGAGTCGATCACTGTCCGCGACAATGGACGCGGTATTCCGGTGGATATCCACAAGGAAGAAGGGGTTTCTGCGGCGGAAGTGATCATGACCGTCCTCCACGCCGGCGGCAAGTTCGACGACAACACCTACAAGGTGTCCGGCGGCTTGCACGGTGTGGGCGTCTCGGTGGTGAACGCGCTGTCCCATGAACTACGC…	ATGCTGATCCTGCGCGGCGCTCCCGCCCTTTCCGCTTTCCGCCACGGCAAACTGCTCGAGCAACTGACCCAGCACGTACCTGCCGTTACCGGGCTGTACGCTGAGTTCGCGCATTTCGCCGACGTCACCGGCGCGCTCACCGCCGACGAGGAGCAGGTGCTGGCGCGGCTGCTGAAATACGGCCCGAGCGTGCCGGTGCAGGAGCCCAGCGGCCGGCTGTTCCTGGTGGTGCCGCGCTTCGGCACCATCTCGCCGTGGTCGAGCAAGGCCTCCGACATCGCCCGCAACTGCGGCCTGGCGAAGATCGACCGGCTGGAGCGCGGCATTGCCTACTATGTGCAGGGCGAACTGTCCGAGAGCGATGCCCAGCAGGTCGCCGCCCGCCTGCATGACCGCATG…	ATGAGTGGCCGCTCCGCTGGTTTCGCCCTGCCCAGCCGCGACGAGTGGCGGCGCGCGCTGGCCGAGTGGGCGCGCAGCGACGGGGCGACCTGGATCTACGTGTTCAAGGTGCTCTGCGCGGCCTTCCTGACCCTCTGGCTGGCGATGCGCCTGGAGTTGCCGCAACCGAGCACGGCGACCATCACCGTGTTCATCGTCATGCAGCCGCAGAGCGGCCAGGTGTTCGCCAAGAGCTTCTACCGCATCCTCGGCACCCTGGTCGGCCTCAGCGTGATGGTCACCCTGATCGCCCTGTTCGCCCAGGAGCGGGTGCTGTTCCTGCTCAGCTCGGCGATCTGGATCGGTCTCTGCACCGCCGGGGCCGCCCGCTACCGTGACTTCCGCTCCTACGCCTGCGTG…	ATGAGCGAATCCCTCGATCTGAGCCTGGAAGGGGTCGAACGCCGGTCGTTGGCCGAGTTCACCGAGCAGGCCTATCTGAACTATTCCATGTACGTGATCATGGACCGCGCCCTGCCGCATATCGGCGACGGCCTGAAACCGGTGCAGCGACGCATCGTCTACGCCATGAGCGAACTGGGGCTGGATGCCGATTCCAAGCACAAGAAGTCGGCGCGCACCGTCGGCGACGTGCTCGGCAAGTTCCACCCGCACGGCGACTCGGCCTGCTACGAGGCCATGGTGCTGATGGCGCAGCCGTTCTCCTATCGCTATCCGCTGGTGGACGGCCAGGGCAACTGGGGGGCGCCGGACGATCCCAAGTCCTTCGCCGCCATGCGTTATACCGAGGCGCGCCTGTCG…	ATGTCTTCACGCAAGATCGGGCTCAACCTGGTGGTCATCGTCGCCCTGGCCGCCCTCTTCACCGGCATCTGGGCCCTGTACAACCGTCCGGTCAGCGTACCGGACTGGCCGGAACGCATCTCCGGCTTCTCCTTCTCGCCGTTCCGCCTCAACCAGAACCCGCAGAGCGGCCGCTACCCCAGCGCCGAACAGATGCGCGCCGACCTGGAACTGGTCGCCCGGCACACCCACAGCATCCGCACCTATTCGGTCCAGGGCGCGCTCGGCGACATCCCGGCGCTGGCCGAGGCGTTCGGCCTGCGCGTCAGCCTGGGCATCTGGCTCGGCCCGGACCTGGCCAGCAACGAGGCCGAGATCGCCCGCGCCATCCGCATCGCCAACGAGTCGCCGAGCGTGGTG…	ATGACCGCCATGCCCGAAGTACTTCGCGAAGATACGCTGAACATCCCCGACAGCCGTGGGCTGAATCTCTACACCTGCGATCCGGCCCTGGAGCGGCTGCTGGAGGTATACCTGCCGCCGGCGTTGCTCGCCGAATGGCGGCCGCTCCTCGAACGGCTCGGCGCCCGTGCCGGCGGCGAGCTGGACGTGCTGGCGCTGGCGGCGGACAAGAACCCGCCGGTGCTGGCGCCGCGCACCCGCCGCGGCGAGGATTTGCAGAGCATTCGCAAGCATCCGGACTACGTCGCCCTCGAACGGGTGGCCTATGCCGAACTCGGCCTGGCTTCCATGAGCCATCGCCCGGACGGCCCGCCGCCGCTGGTGAAGTATGCGCTCACCCACCTGTTCGTACAGGCCGAG…	ATGTCCGAATTCTTCATCAAGCGGCCGAACTTCGCCTGGGTGGTGGCCCTGTTCATCTCCCTGGCCGGCCTGCTGGTCATTTCCAAATTGCCGGTAGCGCAGTACCCCAATGTCGCGCCGCCACAGATCACCATCACCGCCACCTATCCCGGCGCCTCGGCGAAGGTGCTGGTGGACTCCGTCACCAGTGTGCTCGAGGAGTCGCTGAACGGCGCCAAGGGCCTGCTCTACTTCGAGTCGACCAACAACTCCAACGGCACCGCCGAGATCGTCGTCACCTTCGAGCCGGGCACCGATCCGGACCTGGCCCAGGTGGACGTGCAGAACCGCCTGAAGAAAGCCGAGGCGCGCATGCCGCAGGCGGTGCTGACCCAGGGCCTGCAGGTCGAGCAGACCAGC…	ATGAGCCAGCAGCAGATGCCCGTGGCCCTCGATCCGCTGGACTTCCCGTTGCACGGCAGCCGCCTGATCGAGGCCAGCGCCGGTACCGGCAAGACGTTCACCATCGCCCTGCTATACGTACGCCTGGTCCTTGACCATGGCGGCGAGAACGCTTTCGGCCGGCCGCTGAGCCCGCCGGAAATCCTCGTGGTGACCTTCACCGATGCGGCGACCCAGGAACTCCGCGAGCGTATCCGCAGCCGCTTGGGCGAAGCGGCGCGTTGTTTCGCCGAGCCGCAGGAGCGCCACGACGGCCTGCTGGTCGCGTTGCGTCAACAGTATCCCGCCGAGCGCTGGCCGGGCTGCGCGCGCCTGCTGCGCCTGGCCGCGGAGTGGATGGACGAGGCCGCGGTATCGACC…	ATGAGGCGCGCCAGCCTGCATATGTTGCTCTGCCAGTTCGCCATGGCCCTGGGCCTGCTCCTGAGCCTGGGCAGCGAGGCCTGGGCCGCCAGGCCGGCTCCGCAGGCGGCCGTCGACCTGGAAGCGCCGGCCGCCCTGGCCGAGGACGCCAGCCTCGACCAGCTCAACGCGCAACTCGACCTGATCCGCCAGCGCGTCACCGCCGACGCCAGCGACGACCTCCTCGCCGAGTTGCGCCAGAGCGCGCTGCAAGTCCAGCGCCAGGCCGACGCCCTGCTCGCGCTGCGGGTGGCCGACATCGAGCGGCTCGACGATCAGTTGAAAGTGATCGGCCCGCCGCAGCCCGACGAGGCGGAAAGCCTCGCCGCCCAGCGCCAGGCCCTGACTCGGCAGAAGAAC…	CTGCTGTTCGCCGCAGTGGTCATCGGCTTCCCCCAGCGCGCCGGCGAATGGCTGCTGGCCGCGCAGACCTGGGCCTCGCAGACCGTCGGCTGGTACTACCTGCTGGCGATGACGCTGTACCTGATCTTCGTGGTGGTCACCGCGCTTTCCGGCTACGGCAAGATCAAGCTCGGTGCCGACCACGACGAGCCGGAATTCAGCTACCTGTCCTGGGCCGGCATGCTGTTCGCCGCCGGCATCAGCATCACCCTGTTCTTCTTCTGCGTATCCGAACCGCTGACCCACTTCCTCCAGCCGCCGCAAGGCGAGGCCGGTACCCAGGAAGCCGCGCGGCAGGCCATGGAACTGCTGTTCCTGCACTGGGGCCTGCACGGCTGGGGCGTATTCGCCCTGGTGGCG…	ATGGTCCAGGGCACCACCTCGGACGCCGGCAAGAGCACCCTGGTGACCGCGCTGTGCCGCTGGCTGGCCCGGCGCGGCGTCGCGGTGGTGCCGTTCAAGCCGCAGAACATGGCGCTGAACAGCGCGGTCACCGCCGACGGCGGCGAGATCGGCCGCGCCCAGGCGGTCCAGGCCCAGGCCTGTCGGCTGGCGCCGCACACCGACATGAACCCGGTGCTGCTCAAGCCGAACACCGACATCGGCGCCCAGGTGATCATCCATGGCCGCGCGGTGACCAGCATGGACGCCGCCGCCTACCACGACTACAAGCGCGTGGCGATGGAAGCGGTGCTGGCTTCCCATGGGCGGCTCGCCGCCGCCTACCGGGTGGTGATGGTGGAGGGCGCCGGCTCGCCGGCG…	ATGGCCAGCCTGTTCCTCGGTCGCAAGGAAATCGACGACGACCTGCTCGACGACATCGAGACGCGCCTGCTGACCGCCGACGTCGGCGTCGAGGCCACCACCCTGATCGTGCAGAACCTGACCAAGCGCGTGGCGCGCAAGGAGCTGGCCGACAGCGGCGCGCTGTACAAGGCGCTGCAGGAAGAGCTGGCCAGCCTGCTGCGCCCGGTGGAGCAGCCGTTGCAGGTCGACGTCGCGCGCGAGCCCTATGTGATCCTGGTGGTCGGGGTGAACGGCGTGGGCAAGACCACCACCATCGGCAAGCTGGCGAAGAAGCTGCAACTCGAGGGCAAGAAGGTCATGCTGGCCGCCGGCGACACCTTCCGCGCCGCCGCCGTGGAGCAGTTGCAGGTCTGGGGC…	TTGCGCATCGAGAACTTCGCACCCATCGACAGCCAGGGTTTCCGTTTCCTGCTCCGGCCAGGTGACGAACCTCTGCTCGCGCTCATCGATCGCGCCCTGCCGCATATTAGCGGGCGCTACGGCGACGAACTGTTGCGCAGCTGGAGCGCCGGGCGGCGCCTGCGCTTCGATGAGCCCCGGGTGACGCTGTCGCCGGCGGAGCAGCGTTGGCTCTCCGCGCACCCGGTCGTGCCGGTGGTGATCAACCATTCCCTTGGCGCGCTCGGGCAACTGGATAACGAGGGGAGGCTGAGTGGTATCGGGCGTGACTATCTGGACCTGATCGGCAAGCGCAGTGGCCTGCAGTTTTCCTTCACTGGAGCACGCAACTTCGTCGAGACGAAAAGCCGACTGGATGCG…	CGAGCCACCGCCCGCGGACGACTACTACGAAGTCGACATGGATACCCTGGCCTACCTGGATGCCGCGCCCGAGCCTGACGTGGTCGTGGTGGAGGAGCCGCTGCCGGCGGCGAAGCCGGCCACCGGCCTGGCCGCGGAGTGGCTGGAGCTGTTCCCGCGGCTCGGCCTCGGCGGCCTGACCGCGAGCATCGCTGCCAACTGTACGCTGGTAGCCGCCGACGACGACCACTGGCACCTGCATCTCGATCCGGGCCAGAGCGCGCTGTTCAACGCCACCCAGCAGCGGCGGCTGAACGATGCGCTGAACCAGCACCTGGGGCGCACCCTCAAACTGGAGGTGACCCTGCAGAAGCCTGAGCAGGAGACCCCGGCCCAGGCAGCGGCACGCCGGCGTGCCGA…	ATGTCGCAGACGCCGTCCCTCGCCCAGCTCCAGCCCGCCGATGCCTTCCTGCGCCGCCACCTCGGCCCCGATCCGGCGGAACAGCAGGCCATGCTGGATTTCCTCGGAGTTTCCACTCGCGCCGAACTGATCGTGCAGACGGTGCCGCCGGCGATCCGCCTCAACCGGCCGCTGGAACTGCCCGCCGCGCTCGACGAACAGGCCGCCCTGGCGCGCCTGCGCGGCTACGCCGGGCTCAACCAGCGCTGGACCAGCCTGATCGGCATGGGCTACTACGGCACCGTGACGCCGCCGGTGATCCTCCGCAACGTGCTGGAGAATCCCGGCTGGTACACCGCCTATACGCCCTACCAGCCGGAAATCGCCCAGGGCCGCCTGGAAGCGCTGCTGAATTTCCAG…	GTGATTCTCGCCGACGAGCAGGAAGAGTTCGGCGGCAGCCTGCTGGACACCCGCGAGACCCTCGACGGCAAGCCCGCCGCCGAGTGGGTCGCGGACGCCGTGGCCGAGCTGCAAGGCCTGCCGGAAGTCATCCTGCTACCGCGCTCCACGGTCAACGGCTACCACGACCACAACTTCCTCACCATCCACGAGCGGCGCACCGACCACCTCGGCGAGGTCGCCCCGCTCGGCCAGGTCCGCCAGCGCGTGCACCGCGTACGCGCCAAGCGCGTGGTACTGGCCGCCGGCGCCCATGAGCGGCCGCTGGTCTACGGCAACAACGACCTGCCCGGCAACATGCTCGCCGGCGCGGTTTCCACCTATGTACGGCGCTACGGCGTGGCACCGGGCAAGAAACTG…	GTACGCAGCTATCTCGAATGGCTGCTGGACAACCACTTCACCTTCCTCGGCTACGAGGAATTCAGCGTCGCCGACGAGGCCGACGGCGGGCGCATGGTCTACGACGAGAAATCCTTCCTCGGCCTGACCCGTCTGCTGCGTGCCGGCCTGAGCAAGGATGACCTGCACATCGAGGACTATGCCGTCGCCTACCTGCGCGAACCGGTCCTGCTGTCCTTCGCCAAGGCTGCCCATCCGAGCCGTGTGCACCGCCCGGCCTACCCGGACTACGTGTCGATCCGCGAGCTGGACGGCAAGGGCCGGGTGATCCGCGAGTGCCGCTTCATGGGCCTGTTCACCTCCTCGGTGTACAACGAGAGCGTCAACGACATCCCCTTCATCCGCGGCAAGGTCGCCGAA…	GTGTACGGCGAATATTCTCGGGAAAGCATTGTCTGCCTGCTCGCCATACTATTATCCGGCCATCACTACTTATATATAGACCTGAAACAACCGGCGGCCTGGAATGCAGAGTTGTGCCGGCAGGTCGACTGCCGCCTGATCCTCGACTGCTCGACCACGCCGACGCCCGCCAACGGTCTTCCCTGCGTCCCGGTCAGGCACCTGCCTGCCGCTCCAGCCTCGGTCGCCCGGCCATGCTTCGCGGCGGACCAGATCGCCTACATCAACTTCTCCTCGGGCACCACCGGCCGCCCGAAAGCCATCGCCTGCATCCACGCCGGCATTACCCGTCTGTGCCTGGGCCAGTCGTTCCTCGCGTTCGCTCCGCAGATGCGCTTCCTGGTGAACTCGCCGCTGTCC…	CTGCTGGAAGAAGGTGCGGACGAGGTATTCGAGGAAATCCTCGCCGCCGTTACGTCCTACTTCCAGACGCCCATCGCGCTCATTTCCATCCTCGACCATCAGCGCCAGTGGTTTCGCGCGAGCATCGGCCTCGATATCCGGCAGACGCCGCGACGGGATTCGTTCTGCGCCTATGCGATCCTGGGCAAGGGAGTCTTCGAGGTGGCCGACGCCACTCTCGACCCGCGCTTCCGGGACAATCCCTATGTGCAAGGCGAACCGCGCATCCGCTTCTACGCCGGGGCTCCGCTGGCCACCGCGGAAGGTCTCAACCTCGGCAGCCTCTGCGTCATCGACCGGGAACCACGCGGGCCGCTGGCCGAGCGGGACGTCGCCATGCTCGAGCACTTCGCCCGGCTG…	ATGTCCCTGAGTGTCTTCGATCTGTTCAAGATCGGCATCGGGCCGTCCAGCTCCCACACCGTGGGGCCGATGCGTGCCGCCGCGCGCTTCGCCGAGGGGCTGAGGCGCGAGGGGTTGCTGGAGGCCACTGCCAGCGTCAAGGTCGAGCTGTACGGCTCGCTCGGCGCCACCGGCAAGGGCCACGGCAGCGACAAGGCGGTACTGCTCGGCCTGGAGGGCGAGCAGCCGGACACGGTGGATACCGCCGCGATTCCCGCCCGGCTCGATGCCATCCGTTCCAGCGGCGAGCTGCGCCTGCTCGGCGAGCGGCCGATCCGCTTCGTCGAGAAGGAACACCTGGCGCTGATCCGCAAGCCGCTGGCCTACCATCCCAACGGCATGATCTTCCGTGCCTTCGAC…	ATGAACAGAGTTTTCCTGACCCCGGCAGCCGTGGCGCTGTGCGGCGCGTCTTCCCTGAGCCTGGCCGAACCGGTCAGCCTTGCCGACCAGGTGGTGACCGCCACCCGTACCGCCCAGACCGCTTCCCAGAGCCTGGCGGCGGTGAGCGTCATCGACCGCGAGGATATCGAGCGCAGCCAGGCGCGCAGCGTGCCGGAGCTGTTGCGCCAGGTACCCGGCGTGTCGCTGGCGAACAACGGCGGTTTCGGCAAGAACACCACGCTGTTCCTGCGCGGCACCGAGTCCGACCATGTGCTGGTGCTGATCGACGGCATCAAGGTCGGCTCGGCCAGCGCCGGCCTCACCGCGTTCCAGGACTTGCCGGTGGAGCTGATCGAGCGCATCGAGGTGGTCCGCGGG…	GTGCGGGTGCTCAACTGGAGCTGGGGCATCCACCGCGTCGGCGCTCGCGACGTCGATGGCGACGAGGTGGATTCGCTGGTGCGCTCGGGGATCGCCATGAGCGGCTACGAGGAGTTGCTCGAGGAGTTCTTCCTCTGGCTGCGCAAGAAGCATCCGGACGTGCTGGTGGTCAACTCCGCCGGCAACGGCTCGTCCTACTCCGGTACCGACGAATACCGCCTGCCGTCCTCCTTCGTCACCGAGCAGTTGCTGGTGGTGGGCGGCCACCAGCGCAGCGAGCGCCAAGGCCTGGCGGTGGACGACCCGGCCTACGCGGTCAAGCGCAGCACCTCGAACGTCGACATGCGGGTGGATGTCACCGCCGCCGCCTGTACCCATGCCTCGACCCTGGAGCGGGAC…	TTGCAGGCGGCTTGCGCGTTCGGCCCGCCCGGGCGGCTGTTCCGCGCCTGCGACGAGCAAGGACGCGAGGCGTTGCTGCTGCTCGCGGCGGCCGATGCCGACGAAGCGTTCTGGCAGCGCGAATGGGCACTGCGGCGCTGCCGTGCGGAGAGCCTGCCGCGAGTATTGTCGTCGCCCCGGTTGCGTCGTCATGCCTTCCAGTTGTTCGCTCCGCCGCGCTGGCCGATGCGCAGCCTGCTGGATTGGGCGCCAGCGCACCTGCCGCTGGAACCGCAATGCGCGCTGGTCCTCCTGGAACAACTTATCGATGCGGTTCGCGCCTTGCAGCGGCGCGGTGTACAGGGCTTGTGGCTGGCGCCGCGGCAGATCCTGCTGGACGAGGGCGGGCGCCTGCTGTTC…	ATGTTCAACCCGGCCAACCAGACCCACTTCAGCCTCACCCTCGACGGCCTCCGCCACGACCTGCAGGTCCTCGCCTTCAACGGCCACGAAGGCATCAGTCGCCCCTACCGTTTCGAACTCGAACTGGTCGGAGAGCGCGCCGGCCTCGACCTCGAAACGTTCCTCCACCGGCCCGCCTTCCTCGCCTTCACCCCGCAGGGCCAGGGTGTCCACGGCCTGGTCTACGGCGCTACCCAGGGCGATGCCGGCAAGCGCCTGACCTGCTATCGCCTCACCCTCGTCCCGCACCTGGCCTACCTCGCCCAGCGCAACAACCAGCGGATCTTCCAGCACCTCACGGTGCCGCAGATCGTCGCCCTGGTCCTCGAGGAGCACGGCATCCTCGCCGACGCCTACCGC…	GTGGCTCTCCATCGCCTGGCCTTTATCTTCCTGTGCCTGCCGCTCATGGCCAGCGCCGCCCCCTTCACCTCCCCCGGCGACCGCGACCTGATCCGCGACCGCCAGCAGCGCCTGCTGGACGAACAGCGCAAGCGCCTGGAGGAACTCCAGCAACTGCCCGGCAAGGGAGCGCCCGCCGCTGCGGATGCCTCCGGCGACGACGAGCGCTGCTTCGAGATCCGCCGCATCGAGCTGGAAGGCGCCGGGCACCTCGACGAAAGCGCGCGTCGCCAGTTGCTGGCGCCCTACCAGGGGCGCTGCCTGGGCGTCGGCCAGCTCAATGCGCTGCTCAAGGCCGTCACCGACCATTACCTGGATCGCGGCTACGTTACCACCCGCGCCTACCTGCCACAGCAGGAC…	ATGGGTGACCGGCACGACTACGTCGCTCTGGAGTGGGTGAAAGGCGAGATCGCCGAAACCCTGAAACAGGCGCGCCAGGCGCTGGAAGCGTTCGTCGAGAACCCGCAGGACCCGACCCGCATGCGGTTCTGCCTGACCTACGTGCACCA---GGTGCAGGGCACCCTGCAGATGGTCGAGTTCTACGGCGCGGCCCTGCTCGCCGAGGAAATGGAGCAGTTGGTCCAGGCCTTGCTGGACGGTCGCGTGCCGAACCAGGGCGAGGCCCTGGAAGTGCTGATGCAGGCGATCCTGCAACTGCCGGTCTACCTCGACCGGATCCAGACCGCCCGGCGCGACCTACCGATGGTGGTCCTGCCGCTGCTCAACGACCTGCGCGCCGCGCGCGGCGAGAAGCTG…
9	ATGACCTTCGACGCCGCGTTCCAGCAGCTCGGCGAGCGGATGGCCGGCGGGGCCCTGGCGGAAACGGCGCTGGCGCCGTTCACCCATCTGCTGATCGACGAGTTCCAGGATGTCTCGCCGCAGATCGTCCTCTGGCTACAGGCGTTGCACCGTCGCCTGGCAA---CCCAGGGCACCGCGCCGAGCCTGATGGCCATCGGCGACGACTGGCAGTCGATCTACGGCTGGCGCGGCAGTTCGCCGGAGCTGTTCATCGACTTCGACCGGCATTTCCCTTCGCGTGGGCGGGGACGCAAGAGCGCGCTGCTGGTGCTGGAAACCAACTACCGCTCCGTCGAACCGATCATTCGCGACGGCGAGAAGGTGCTGGCCGGGGTGCGTTTCAAGCAGGACAAGACC…	ATGCACCTGTTGCGCACCCAACCCGGCGGCTTCGTTCCCGACGACGGCATCGCCCACCTGGCCCAGACTCCCGCCGAGCTGGTGATCCTCTGCAGCGGCGATTCGCACCTCGCATTGCTGGCCGAGGCCGCCCGTGCGCTGCCGGACGACTACCCGAGCCTGCGCCTGGCCAACCCCATGCAGTTGCAGAACCACGCCTCGGTGGACCTCTACGTCGAGGAAGTGCTGCGGCACGCGCGGGTGATCCTGCTTTCGCTGCACGGCGGCATCGGCTACTGGCGCTACGGCGTGGAGCAACTGGTGGCGCTGGCCGAGCGCGGCGCGCTGCTGATCCCGGTGCCCGGCGACGACCGCCCCGACCCGGAGCTGAGCGCCCTCGGCAACCTGCCGGCGGAGCAG…	ATGTTCGAACGCATCATCCAATTCGCCATCGAGCAACGCTGGCTGGTCCTGCTGGCGGTGCTGGGGATGGCCGGGGTCGGCATCGGCAGCTACCAGAAGCTGTCCATCGACGCGGTCCCGGACATCACCAACGTCCAGGTGCAGATCAATACCGCCGCCCCCGGCTACTCGCCGCTGGAAGTGGAGCAGCGGATCACCTACCCGGTGGAGACCGTCATGGCCGGCCTGCCGGGTTTGCAGGAAACCCGTTCGCTGTCGCGGCCGGGGATTTCCCAGGTGACGGTGATCTTCGAGGAGGGCACCGACATCTACTTCGCCCGCCAGCAGGTCAACGAACGCTTGAGCACGGCGCGCGAGCAACTGCCGGAAGACATCTCGCCGACCCTCGGGCCGATCTCC…	ATGTCCTTCAACCTTTCCGCCTGGGCGTTGCAGAATCGCCAGATCGTCCTGTACCTGATGATCCTGCTTGGCGCGGTCGGCGCGCTGTCCTACAGCAAGCTGGGGCAGAGCGAAGACCCGCCGTTCACCTTCAAGGCCATGGTGGTGCAGACCAACTGGCCGGGCGCCAGCGCCGAAGAGGTGGCCCGGCAGGTCACCGAGCGTATCGAGAAGAAGCTGATGGAAACCGGCGACTACGATCGCATCGTGTCCTTCTCCCGCCCCGGCGTCTCGCAGGTGACCTTCATGGCCCGCGAGGACATCCATTCCAGCGAGATCCCCGAACTCTGGTACCAGATCCGCAAGAAGATCAGCGACATTCGCGCCACCTTGCCGCAAAGCATCCAGGGCCCGTTCTTC…	ATGCGCACCGAGCAACCGAAAGTCATCCACCTCAAGGACTATCAGGCGCCGGACTACCTGATCGACGAGACCCACCTGAAGTTCGAACTGTTCGAAGACCACAGCCTGGTACACGCCGAGTTGAAGCTGCGGCGCAACCCCGAGCGCGGCGCCGGCCTGCCGCCGCTGTTGCTGCATGGCCAGCAACTGGAGCTGCTGGCGCTCGAACTGGACGGCCAGGCGCTCGGCGCGGACGACTACCAACTGGACGACGAGCAGCTCGGGGTGCAACCGCGGCAGGCCGAATTCGTCCTCAGGAGCACGGTGCGTATCCATCCGGAGAGCAACACCGCGCTGGAAGGCCTGTACAAGTCCGGCAAGATGTTCTGCACCCAGTGCGAGGCCGAGGGTTTCCGCAAG…	ATGACCGATAACCTGAACCTCGGCGCCATCGACCTGGGCACCGACGACGAATTCATCGCCCGCCATATCGGCCCGCGTGCCGCCGACACCCAGGCCATGCTCCAGCGCCTGGGCTACGACTCGCTGGACGCGCTGATCGGCAACGTGATCCCCGACAGCATCAAGGGCAGCAGCGTGCTCGACCTGCCGGCCGGCATGGGCGAGGCCGAGGCGCTGGCCAGCCTGAAGGCGATCGCCGCGCGCAATCGCGCGTTGCGTTCCTTCATCGGCCAGGGCTACTACAACTGCCACACCCCGGCACCGATCCTGCGCAACCTCCTGGAGAACCCGGCCTGGTACACCGCCTACACGCCGTACCAGCCGGAAATCTCCCAGGGCCGCCTGGAGGCGCTGCTGAAC…	GCAGGTTTCCCATGACGAGCTGGTCGCTCGCCTGTCCATGGTCGGCCTCGAGGTCGACGCCGACCTGCCGGTCGCCGGCGCCTTCAGCGGCGTGGTGGTCGGTGAGGTGCTCTCGACCGAACAGCATCCGGACGCCGACAAGCTGCGCGTCTGCCAGGTCAGCAACGGCAGCGAGACCTTCCAGGTCGTCTGCGGTGCGCCCAACGTGCGCGCGGGCCTGAAGATTCCCTTCGCCATGATCGGCGCCGAACTGCCGGGCGACTTCAAGATCAAGAAAGCCAAGCTGCGTGGCGTCGAGTCCTTCGGCATGCTCTGCTCGGCCAAGGAATTGCAGATCAGCGAAGAGAACGCCGGTCTGCTCGAGCTGCCGGCCGACGCGCCGGTCGGCCAGGACGTCCG…	ATGAGCGAGAACAACACGTACGACTCTTCCAGCATCAAGGTGCTGAAGGGGCTGGATGCCGTACGCAAGCGCCCCGGCATGTACATCGGCGACACCGACGATGGCACCGGTCTGCACCACATGGTGTTCGAGGTGGTGGATAACTCCATCGACGAAGCGCTGGCCGGTTACTGCAGCGAAATCAGCATCACCATCCATACGGATGAGTCGATCACTGTCCGCGACAATGGACGCGGTATTCCGGTGGATATCCACAAGGAAGAAGGGGTTTCTGCGGCGGAAGTGATCATGACCGTCCTCCACGCCGGCGGCAAGTTCGACGACAACACCTACAAGGTGTCCGGCGGCTTGCACGGTGTGGGCGTCTCGGTGGTGAACGCGCTTTCCCATGAGCTGCGC…	ATGCTGATCCTGCGCGGCGCTCCCGCCCTTTCCGCTTTCCGCCACGGCAAACTGCTCGAGCAACTGACCCAGCACGTACCTGCCGTTACCGGGCTGTACGCTGAGTTCGCGCATTTCGCCGACGTCACCGGCGCGCTCACCGCCGACGAGGAGCAGGTGCTGGCGCGGCTGCTGAAATACGGCCCGAGCGTGCCGGTGCAGGAGCCCAGCGGACGGCTGTTCCTGGTGGTGCCGCGCTTCGGCACCATCTCGCCGTGGTCGAGCAAGGCCTCCGACATCGCCCGCAACTGCGGCCTGGCGAAGATCGACCGGCTGGAGCGCGGCATTGCCTACTATGTGCAGGGCGAACTGTCCGAGAGCGACGCCCAGCAGGTCGCCGCCCGCCTGCATGACCGCATG…	ATGAGCGGCCGCTCCGCTGGTTTCGCCCTGCCCAGCCGCGACGAGTGGCGGCGCGCGCTGGCCGAGTGGGCGCGCAGCGACGGGGCGACCTGGATCTACGTGTTCAAGGTGCTCTGCGCGGCCTTCCTGACCCTCTGGCTGGCGATGCGCCTGGAATTGCCGCAGCCGAGCACGGCGACCATCACCGTGTTCATCGTCATGCAGCCGCAGAGCGGCCAGGTGTTCGCCAAGAGCTTCTACCGCATCCTCGGCACCCTGGTCGGCCTCAGCGTGATGGTCACCCTGATCGCCCTGTTCGCCCAGGAGCGAGTGCTGTTCCTGCTCAGCTCGGCGATCTGGATCGGCCTCTGCACCGCCGGGGCCGCCCGCTACCGTGACTTCCGCTCCTACGCCTGCGTG…	ATGAGCGAATCCCTCGATCTGAGCCTGGAAGGGGTCGAACGCCGGTCGTTGGCCGAGTTCACCGAGCAGGCCTATCTGAACTATTCCATGTACGTGATCATGGACCGCGCCCTGCCGCATATCGGCGACGGCCTGAAACCGGTGCAGCGACGCATCGTCTACGCCATGAGCGAACTGGGGCTGGATGCCGATTCCAAGCACAAGAAGTCGGCGCGCACCGTCGGCGACGTGCTCGGCAAGTTCCACCCGCACGGCGACTCGGCCTGCTACGAGGCCATGGTGCTGATGGCGCAGCCGTTCTCCTATCGCTATCCGCTGGTGGACGGCCAGGGCAACTGGGGGGCGCCGGACGATCCCAAGTCCTTCGCCGCCATGCGTTATACCGAGGCGCGCCTGTCG…	ATGTCTTCACGCAAGATCGGGCTCAACCTGGTGGGCATCGTCGCCCTGGCCGCCCTCTTCACCGGCATCTGGGCCCTGTACAACCGTCCGGTCAGCGTACCGGACTGGCCGGAACGCATCTCCGGCTTCTCCTTCTCGCCGTTCCGCCTCAACCAGAACCCGCAGAGCGGCCGCTACCCCAGCGCCGAACAGATGCGCGCCGACCTGGAACTGGTCGCCCGGCACACCCACAGCATCCGCACCTATTCGGTCCAGGGCGCGCTCGGCGACATCCCGGCGCTGGCCGAGGCGTTCGGCCTGCGCGTCAGCCTGGGCATCTGGCTCGGCCCGGACCTGGCCAGCAACGAGGCCGAGATCGCCCGCGCCATCCGCATCGCCAACGAGTCGCCGAGCGTGGTG…	ATGACCGCCATGCCCGAAGTACTTCGCGAAGATACGCTGAACATCCCCGACAGCCGTGGGCTGAATCTCTACACCTGCGATCCGGCCCTGGAGCGGCTGCTGGAGGTATACCTGCCGCCGGCGTTGCTCGCCGAATGGCGGCCGCTCCTCGAACGGCTCGGCGCCCGTGCCGGCGGCGAGCTGGACGTGCTGGCGCTGGCGGCGGACAAGAACCCGCCGGTGCTGGCGCCGCGCACCCGCCGCGGCGAGGATTTGCAGAGCATTCGCAAGCATCCGGACTACGTCGCCCTCGAACAGGTGGCCTATGCCGAACTTGGCCTGGCTTCCATGAGCCATCGCCCGGACGGCCCGCCGCCGCTGGTGAAGTATGCGCTCACCCACCTGTTCGTACAGGCCGAG…	ATGTCCGAATTCTTCATCAAGCGGCCGAACTTCGCCTGGGTGGTGGCCCTGTTCATCTCCCTGGCCGGCCTGCTGGTCATTTCCAAATTGCCGGTAGCGCAGTACCCCAATGTCGCGCCGCCACAGATCACCATCACCGCCACCTATCCCGGCGCCTCGGCGAAGGTGCTGGTGGACTCCGTCACCAGTGTGCTCGAGGAGTCGCTGAACGGCGCCAAGGGCCTGCTCTACTTCGAGTCGACCAACAACTCCAACGGCACCGCCGAGATCGTCGTCACCTTCGAGCCGGGCACCGATCCGGACCTGGCCCAGGTGGACGTGCAGAACCGCCTGAAGAAAGCCGAGGCGCGCATGCCGCAGGCGGTGCTGACCCAGGGCCTGCAGGTCGAGCAGACCAGC…	ATGAGCCAGCAGCAGATGCCCGTGGCCCTCGATCCGCTGGACTTCCCGTTGCACGGCAGCCGCCTGATCGAGGCCAGCGCCGGTACCGGCAAGACGTTCACCATCGCCCTGCTATACGTACGTTTGGTCCTCGACCATGGCGGCGAGAACGCTTTCGGCCGGCCGCTGAGCCCGCCGGAAATCCTCGTGGTGACCTTCACCGATGCGGCGACCCAGGAACTCCGCGAGCGTATCCGCAGCCGCCTGGGCGAAGCGGCGCGTTGTTTCGCCGAGCCGCAGGAGCGCCACGACGGCCTGCTGGTCGCGTTGCGCCAGCAGTATCCCGCCGAGCGCTGGCCGGGCTGCGCGCGCCTGCTGCGCCTGGCCGCGGAGTGGATGGACGAGGCCGCGGTATCGACC…	ATGAGGCGCGCCAGCCTGCATATGTTGCTCTGCCAGTTCGCCATGGCCCTGGGCCTGCTCCTGAGCCTGGGCAGCGAGGCCTGGGCCGCCAGGCCGGCTCCGCAGGCGGCCGTCGACCTGGAAGCGCCGCCCGCCCTGGCCGAGGACGCCAGCCTCGACCAGCTCAACGCGCAACTCGACCTGATCCGCCAGCGCGTTACCGCCGACGCCAGCGACGACCTCCTCGCCGAGTTGCGCCAGAGCGCGCTGCAAGTCCAGCGTCAGGCCGACGCCCTGCTCGCGCTACGGGTGGCCGACATCGAGCGGCTCGACGATCAGTTGAAAGTGATCGGCCCGCCGCAGCCCGACGAGGCGGAAAGCCTCGCCGCCCAGCGCCAGGCCCTGACCCGGCAGAAGAAC…	CTGCTGTTCGCCGCAGTGGTCATCGGCTTCCCCCAGCGCGCCGGCGAATGGCTGCTGGCCGCGCAGACCTGGGCCTCGCAGACCGTCGGCTGGTACTACCTGCTGGCGATGACGCTGTACCTGATCTTCGTGGTGGTCACCGCGCTTTCCGGCTACGGCAAGATCAAGCTCGGTGCCGACCACGACGAGCCGGAATTCAGCTACCTGTCCTGGGCCGGCATGCTGTTCGCCGCCGGCATCAGCATCACCCTGTTCTTCTTCTGCGTATCCGAACCGCTGACCCACTTCCTCCAGCCGCCGCAAGGCGAGGCCGGTACCCAGGAAGCCGCGCGGCAGGCCATGGAACTGCTGTTCCTGCACTGGGGCCTGCACGGCTGGGGCGTGTTCGCCCTGGTGGCG…	ATGGTCCAGGGCACCACCTCGGACGCCGGCAAGAGCACCCTGGTGACCGCGCTGTGCCGCTGGCTGGCTCGGCGCGGCGTCGCGGTGGTGCCGTTCAAGCCGCAGAACATGGCGCTGAACAGCGCGGTCACCGCCGACGGCGGCGAGATCGGCCGCGCCCAGGCGGTCCAGGCCCAGGCCTGTCGGCTGGCGCCGCACACCGACATGAACCCGGTGCTGCTCAAGCCGAACACCGACATCGGCGCCCAGGTGATCATCCATGGCCGCGCGGTGACCAGCATGGACGCCGCCGCCTATCACGACTACAAGCGCGTGGCGATGGAAGCGGTGCTGGCTTCCCATGGGCGGCTCGCCGCCGCCTACCGGGTGGTGATGGTGGAGGGCGCCGGCTCGCCGGCG…	ATGGCCAGCCTGTTCCTCGGCCGCAAGGAAATCGACGACGACCTGCTCGACGACATCGAGACGCGCCTGCTGACCGCCGACGTCGGCGTCGAGGCCACCACCCTGATCGTGCAGAACCTGACCAAGCGCGTGGCGCGCAAGGAGCTGGCCGACAGCGGCGCGCTGTACAAGGCGCTGCAGGAAGAGCTGGCCAGCCTGCTGCGCCCGGTGGAGCAGCCGTTGCAGGTCGACGTCGCGCGCGAGCCCTATGTGATCCTGGTGGTCGGGGTGAACGGCGTGGGCAAGACCACCACCATCGGCAAGCTGGCGAAGAAGCTGCAACTCGAGGGCAAGAAGGTCATGCTGGCCGCCGGCGACACCTTCCGCGCCGCCGCCGTGGAGCAGTTGCAGGTCTGGGGC…	TTGCGCATCGAGAACTTCGCACCCATCGACAGCCAGGGTTTCCGTTTCCTGCTCCGGCCAGGTGACGAACCTCTGCTCGCGCTCATCGATCGCGCCCTGCCGCATATTAGCGGGCGCTACGGCGACGAACTGTTGCGCAGCTGGAGCGCCGGGCGGCGCCTGCGCTTCGACGAGCCCCGGGTGACGCTGTCGCCGGCGGAGCAGCGTTGGCTCTCCGCGCACCCGGTCGTGCCGGTGGTGATCAACCATTCCCTTGGCGCGCTCGGGCAACTGGATAACGAGGGGAGGCTGAGTGGTATCGGGCGTGACTATCTGGACCTGATCGGCAAGCGCAGTGGCCTGCAGTTTTCCTTCACTGGAGCACGCAACTTCGTCGAGACGAAAAGCCGACTGGATGCG…	CGAGCCACCGCCCGCGGACGACTACTACGAAGTCGACATGGATACCCTGGCCTACCTGGATGCCGCGCCCGAGCCTGACGTGGTCGTGGTGGAGGAGCCGCTGCCGGCGGCGAAGCCGGCCACCGGCCTGGCCGCGGAGTGGCTGGAGCTGTTCCCGCGGCTCGGCCTCGGCGGCCTGACCGCCAGCATCGCTGCCAACTGTACGCTGGTAGCTGCCGACGACGACCAATGGCATCTGCATCTCGATCCGGGCCAGAGCGCGCTGTTCAACGCCACCCAGCAGCGGCGGCTGAACGATGCGCTGAACCAGCACCTGGGGCGCACCCTCAAACTGGAGGTGACCCTGCAGAAGCCTGAGCAGGAGACCCCGGCCCAGGCAGCGGCACGCCGGCGTGCCGA…	ATGTCGCAGACGCCGTCCCTCGCCCAGCTCCAGCCCGCCGATGCCTTCCTGCGCCGCCACCTCGGCCCCGATCCTGCGGAACAGCAGGCCATGCTGGACTTCCTCGGAGTTTCCACTCGCGCCGAACTGATCGTGCAGACGGTGCCGCCGGCGATCCGCCTCAACCGGCCGCTGGAACTGCCCGCCGCGCTCGACGAACAGGCCGCCCTGGCGCGCCTGCGCGGCTACGCCGGGCTCAACCAGCGCTGGACCAGCCTGATCGGCATGGGCTACTACGGCACCGTGACGCCGTCGGTGATCCTCCGCAACGTGCTGGAGAATCCCGGCTGGTACACTGCCTATACGCCCTACCAGCCGGAAATCGCCCAGGGCCGCCTGGAAGCGCTGCTGAATTTCCAG…	GTGATTCTCGCCGACGAGCAGGAAGAGTTCGGCGGCAGCCTGCTGGACACCCGCGAGACCCTCGACGGCAAGCCCGCCGCCGAGTGGGTCGCGGACGCCGTGGCCGAGCTGCAAGGCCTGCCGGAAGTCATCCTGCTACCGCGCTCCACGGTCAACGGCTACCACGACCACAACTTCCTCACCATCCACGAGCGGCGCACCGACCACCTCGGCGAGGTCGCCCCGCTCGGCCAGGTCCGCCAGCGCGTGCACCGCGTACGCGCCAAGCGCGTGGTACTGGCCGCCGGCGCCCATGAGCGGCCGCTGGTCTACGGCAACAACGACCTGCCCGGCAACATGCTCGCCGGCGCGGTTTCCACCTATGTACGGCGCTACGGCGTGGCACCGGGCAAGAAACTG…	GTACGCAGCTATCTCGAATGGCTGCTGGACAACCACTTCACCTTCCTCGGCTACGAGGAATTCAGCGTCGCCGACGAGGCCGACGGCGGGCGCATGGTCTACGACGAGAAATCCTTCCTCGGCCTGACCCGTCTGCTGCGTGCCGGCCTGAGCAAGGATGACCTGCACATCGAGGACTATGCCGTCGCCTACCTGCGCGAACCGGTCCTGCTGTCCTTCGCCAAGGCTGCCCATCCGAGCCGTGTGCACCGCCCGGCCTACCCGGACTACGTGTCGATCCGCGAGCTGGACGGCAAGGGCCGGGTGATCCGCGAGTGCCGCTTCATGGGCCTGTTCACCTCCTCGGTGTACAACGAGAGCGTCAACGACATCCCCTTCATCCGCGGCAAGGTCGCCGAA…	GTGTACGGCGAATATTCTCGGGAAAGCATTACCTGTCTGCTCGCCATACTGTTATCCGGCCATCACTACTTATATATAGACCTGAAACAACCGGCGGCCTGGAATGCAGAGTTGTGCCGGCAGGTCGACTGCCGCCTGATTCTCGACTGCTCGACCACGCCGACGCCCGCCAACGGTCTTCCCTGCGTCCCGGTCAGGCACCTGCCTGCCGCTCCAGCCTCGGTCGCCCGGCCATGCTTCGCGGCGGACCAGATCGCCTACATCAACTTCTCCTCGGGCACCACCGGCCGCCCGAAAGCCATCGCCTGCACCCACGCCGGCATTACCCGCCTGTGCCTGGGCCAGTCGTTCCTCGCGTTCGCTCCGCAGATGCGCTTCCTGGTGAACTCGCCGCTGTCC…	CTGCTGGAAGAAGGTGCGGACGAGGTATTCGAGGAAATCCTCGCCGCCGCTACGTCCTACTTCCAGACGCCCATCGCGCTCATTTCCATCCTCGACCATCAGCGCCAGTGGTTTCGCGCGAGCATCGGCCTCGATATCCGGCAGACGCCGCGACGGGATTCGTTCTGCGCCTATGCGATCCTGGGCAAGGGAGTCTTCGAGGTGGCCGACGCCACCCTCGACCCGCGCTTCCGGGACAACCCCTATGTGCAAGGCGAACCGCGCATCCGCTTCTACGCCGGGGCTCCGCTGGCCACCGCGGAAGGTCTCAACCTCGGCAGCCTCTGCGTCATCGACCGGGAACCACGCGGGCCGCTGGCCGAGCGGGACGTCGCCATGCTCGAGCACTTCGCTCGGCTG…	ATGTCCCTGAGTGTCTTCGATCTGTTCAAGATCGGCATCGGGCCGTCCAGCTCCCACACCGTGGGGCCGATGCGTGCCGCCGCGCGCTTCGCTGAGGGGCTGAGGCGCGAGGGGTTGCTGGAGGCCACTGCCAGCGTCAAGGTCGAGCTGTACGGCTCGCTCGGCGCCACCGGCAAGGGCCACGGCAGCGACAAGGCGGTACTGCTCGGCCTGGAGGGCGAGCAGCCGGACACGGTGGATACCGCCGCGATTCCCGCTCGGCTCGATGCCATCCGTTCCAGCGGCGAGCTGCGCCTGCTCGGCGAGCGGCCGATCCGCTTCGTCGAGAAGGAACACCTGGCGCTGATCCGCAAGCCGCTGGCCTACCATCCCAACGGCATGATCTTCCGTGCCTTCGAC…	ATGAACAGAGTTTTCCTGACCCCGGCAGCCGTGGCGCTGTGCGGCGCGTCTTCCCTGAGCCTGGCCGAACCGGTCAGCCTTGCCGACCAGGTGGTGACCGCCACCCGTACCGCCCAGACCGCTTCCCAGAGCCTGGCGGCGGTGAGCGTCATCGACCGCGAGGATATCGAGCGCAGCCAGGCGCGCAGCGTGCCGGAGCTGTTGCGCCAGGTACCCGGCGTGTCGCTGGCGAACAACGGCGGTTTCGGCAAGAACACCACGCTGTTCCTGCGCGGCACCGAGTCCGACCATGTGCTGGTGCTGATCGACGGCATCAAGGTCGGCTCGGCCAGCGCCGGCCTCACCGCGTTCCAGGATTTGCCGGTGGAGCTGATCGAGCGCATCGAGGTGGTCCGCGGG…	GTGCGGGTGCTCAACTGGAGCTGGGGCATCCACCGCGTCGGCGCTCGCGACGTCGATGGCGACGAGGTGGATTCGCTGGTGCGCTCGGGGATTGCCATGAGCGGCTACGAGGAGTTGCTCGAGGAGTTCTTCCTCTGGCTGCGCAAGGAGCATCCGGACGTGCTGGTGGTCAACTCCGCCGGCAACGGCTCGTCCTACTCCGGTACCGACGAATACCGCCTGCCGTCCTCCTTCGTCACCGAGCAGTTGCTGGTGGTGGGCGGCCACCAGCGCAGCGAGCGCCAAGGCCTGGCGGTGGACGACCCGGCCTACGCGGTCAAGCGCAGCACCTCGAACGTCGACATGCGGGTGGATGTCACCGCCGCCGCCTGTACCCATGCCTCGACCCTGGAGCGGGAC…	TTGCAGGCGGCTTGCGCGTTCGGCCCGCCCGGGCGGCTGTTCCGCGCCTGCGACGAGCAAGGACGCGAGGCGTTGCTGCTGCTCGCGGCGGCCGATGCCGACGAAGCGTTCTGGCAGCGCGAATGGGCACTGCGGCGCTGCCGTGCGGAGAGCCTGCCGCGAGTATTGTCGTCGCCCCGGTTGCGTCGTCATGCCTTCCAGTTGTTCGCTCCGCCGCGCTGGCCGATGCGCAGCCTGCTGGATTGGGCGCCAGCGCACCTGCCGCTGGAACCGCAATGCGCGCTGGTCCTCCTGGAGCAACTTATCGATGCGGTTCGCGCCTTGCAGCGGCGCGGTGTACAGGGCTTGTGGCTGGCGCCGCGGCAGATCCTGCTGGACGAGGGCGGGCGCCTGCTGTTC…	ATGTTCAACCCGGCCAACCAGACCCACTTCAGCCTCACCCTCGACGGCCTCCGCCACGACCTGCAGGTCCTCGCCTTCAACGGCCACGAAGGCATCAGTCGCCCCTACCGTTTCGAACTCGAACTGGTCGGAGAGCGCGCCGGCCTTGACCTCGAAACGTTCCTCCACCGGCCCGCCTTCCTCGCCTTCACCCCGCAGGGCCAGGGTGTCCACGGCCTGGTCTACGGCGCTGCCCAGGGCGATGCCGGCAAGCGCCTGACCCGCTATCGCCTCACCCTCGTCCCGCACCTGGCCTACCTCGCCCAGCGCAACAACCAGCGGATCTTCCAGCACCTCACGGTGCCGCAGATCGTCGCCCTGGTCCTCGAGGAGCACGGCATCCTCGCCGACGCCTACCGC…	GTGGCTCTCCATCGCCTGGCCTTTATCTTCCTGTGCCTGCCGCTCATGGCCAGCGCCGCCCCCTTCACCTCCCCCGGCGACCGCGACCTGATCCGCGACCGCCAGCAGCGCCTGCTGGACGAACAGCGCAAGCGCCTGGAGGAACTCCAGCAACTGCCCGGCAAGGGAGCGCCCGCCGCTGCGGATGCCTCCGGCGACGACGAGCGCTGCTTCGAGATCCGCCGCATCGAGCTGGAAGGCGCCGGGCACCTCGACGAAAGCGCGCGTCGCCAGTTGCTGGCGCCCTACCAGGGGCGCTGCCTGGGCGTCGGCCAGCTCAATGCGCTGCTCAAGGCCGTCACCGACCATTACCTGGATCGCGGCTACGTCACCACCCGCGCCTACCTGCCACAGCAGGAC…	ATGGGTGACCGGCACGACTACGTCGCTCTGGAATGGGTGAAAGGCGAGATCGCCGAAACCCTGAAACAGGCGCGCCAGGCGCTGGAAGCGTTCGTCGAGAACCCGCAGGACCCGACCCGCATGCGGTTCTGCCTGACCTACGTGCACCA---GGTGCAGGGCACCCTGCAGATGGTCGAGTTCTACGGCGCGGCCCTGCTCGCCGAGGAAATGGAGCAGTTGGTCCAGGCCTTGCTGGACGGTCGCGTGCCGAACCAGGGCGAGGCCCTGGAAGTGCTGATGCAGGCGATCCTGCAACTGCCGGTCTACCTCGACCGGATCCAGACCGCCCGGCGCGACCTGCCGATGGTGGTCCTGCCGCTGCTCAACGACCTGCGCGCCGCGCGCGGTGAGAAGCTG…
10	ATGACCTTCGACGCCGCGTTCCAGCAGCTCGGCGAGCGGATGGCCGGCGGGGCCCTGGCGGAAACGGCGCTGGCGCCGTTCACCCATCTGCTGATCGACGAGTTCCAGGATGTCTCGCCGCAGATCGTCCTCTGGCTACAGGCGTTGCACCGTCGCCTGGCGA---CCCAGGGCACCGCGCCGAGCCTGATGGCCATCGGCGACGACTGGCAGTCGATCTACGGCTGGCGCGGCAGTTCGCCGGAGCTGTTCATCGACTTCGACCGGCACTTCCCCTCGCGTGGGCGGGGACGCAAGAGCGCGCTGCTGGTGCTGGAAACCAACTACCGCTCCGTCGAACCGATCATTCGCGACGGCGAGAAGGTGCTGGCCGGGGTGCGTTTCAAGCAGGACAAGACC…	ATGCACCTGTTGCGCACCCAACCCGGCGGCTTCGTTCCCGACGACGGCATCGCCCACCTGGCCCAGACTCCCGCCGAGCTGGTGATCCTCTGCAGCGGCGATTCGCACCTCGCATTGCTGGCCGAGGCCGCCCGTGCGCTGCCGGACGACTACCCGAGCCTGCGCCTGGCCAACCCCATGCAGTTGCAGAACCACGCCTCGGTGGACCTCTACGTCGAGGAAGTGCTGCGGCACGCGCGGGTGATCCTGCTTTCGCTGCACGGCGGCATCGGCTACTGGCGCTACGGCGTGGAGCAACTGGTGGCGCTGGCCGAGCGCGGCGCGCTGCTGATCCCGGTGCCCGGCGACGACCGCCCCGACCCGGAGCTGAGCGCCCTCGGCAACCTGCCGGCGGAGCAG…	ATGTTCGAACGCATCATCCAATTCGCCATCGAGCAACGCTGGCTGGTCCTGCTGGCGGTGCTGGGGATGGCCGGGGTCGGCATCGGCAGTTACCAGAAGCTGTCCATCGACGCGGTCCCGGACATCACCAACGTCCAGGTGCAGATCAATACCGCCGCCCCCGGCTACTCGCCGCTGGAAGTGGAGCAGCGGATCACCTACCCGGTGGAGACCGTCATGGCCGGCCTGCCGGGTTTGCAGGAAACCCGTTCGCTGTCGCGGCCGGGGATTTCCCAGGTGACGGTGATCTTCGAGGAGGGCACCGACATCTACTTCGCCCGCCAGCAGGTCAACGAACGCCTGAGCACGGCGCGCGAGCAACTGCCGGAAGACATCTCGCCGACCCTCGGGCCGATCTCC…	ATGTCCTTCAACCTTTCCGCCTGGGCGTTGCAGAATCGCCAGATCGTCCTGTACCTGATGCTCCTGCTTGGCGCGGTTGGCGCGCTGTCCTACAGCAAGCTGGGGCAGAGCGAAGACCCGCCGTTCACCTTCAAGGCCATGGTGGTGCAGACCAACTGGCCGGGTGCCAGCGCCGAAGAGGTGGCCCGGCAGGTCACCGAGCGTATCGAGAAGAAGCTGATGGAAACCGGCGACTACGATCGCATCGTGTCCTTCTCCCGCCCCGGCGTCTCGCAGGTGACCTTCATGGCCCGCGAGGACATCCATTCCAGCGAGATCCCCGAACTCTGGTACCAGATCCGCAAGAAGATCAGCGACATTCGCGCCACCTTGCCGCAAAGCATCCAGGGCCCGTTCTTC…	ATGCGCACCGAGCAACCGAAAGTCATCCACCTCAAGGACTATCAGGCGCCGGACTACCTGATCGACGAGACCCACCTGAAGTTCGAACTGTTCGAAGACCACAGCCTGGTGCACGCCGAGCTGAAGCTGCGGCGCAACCCCGAGCGCGGCGCCGGCCTGCCGCCGCTGTTGCTGCATGGCCAGCAACTGGAGCTGCTGGCGCTCGAACTGGACGGCCAGGCGCTCGGCGCGGACGACTACCAACTGGACGACGAGCAGCTCGGGGTGCAACCGCGGCAGGCCGAATTCGTCCTCAGGAGCACGGTGCGTATCCATCCGGAGAGCAACACCGCGCTGGAAGGCCTGTACAAGTCCGGCAAGATGTTCTGCACCCAGTGCGAGGCCGAGGGTTTCCGCAAG…	ATGACCGATAACCTGAACCTCGGCGCCATCGACCTGGGCACCGACGACGAATTCATCGCCCGCCATATCGGCCCGCGTGCCGCCGACACCCAGGCCATGCTCCAGCGCCTGGGCTACGACTCGCTGGACGCGCTGATCGGCAACGTGATCCCCGACAGCATCAAGGGCAGCAGCGTGCTCGACCTGCCGGCCGGCATGGGCGAGGCCGAGGCGCTGGCCAGCCTGAAGGCGATCGCCGCGCGCAATCGCGCGTTGCGTTCCTTCATCGGCCAGGGCTACTACAACTGCCACACCCCGGCACCGATCCTGCGCAACCTCCTGGAGAACCCGGCCTGGTACACCGCCTACACGCCGTACCAGCCGGAAATCTCCCAGGGCCGCCTGGAGGCGCTGCTGAAC…	GCAGGTTTCCCATGACGAGCTGGTCGCTCGCCTGTCCATGGTCGGCCTCGAGGTCGACGCCGACCTGCCGGTCGCCGGCGCCTTCAGCGGCGTGGTGGTCGGCGAGGTGCTCTCGACCGAACAGCATCCGGACGCCGACAAGCTGCGCGTCTGCCAGGTCAGCAACGGCAGCGAGACCTTCCAGGTCGTCTGCGGCGCGCCCAACGTGCGCGCGGGCCTGAAGATTCCCTTCGCCATGATCGGCGCCGAACTGCCGGGCGACTTCAAGATCAAGAAAGCCAAGCTGCGTGGCGTCGAGTCCTTCGGCATGCTCTGCTCGGCCAAGGAATTGCAGATCAGCGAAGAGAACGCCGGTCTGCTCGAGCTGCCGGCTGACGCGCCGGTCGGCCAGGACGTCCG…	ATGAGCGAGAACAACACGTACGACTCTTCCAGCATCAAGGTGCTGAAGGGGCTGGATGCCGTACGCAAGCGCCCCGGCATGTACATCGGCGACACCGACGATGGCACCGGTCTGCACCACATGGTGTTCGAGGTGGTGGATAACTCCATCGACGAAGCGCTGGCCGGTTACTGCAGCGAAATCAGCATCACCATCCATACGGATGAGTCGATCACTGTCCGCGACAATGGACGCGGTATTCCGGTGGATATCCACAAGGAGGAAGGGGTTTCTGCGGCGGAAGTGATCATGACCGTCCTCCACGCCGGCGGCAAGTTCGACGACAACACCTACAAGGTGTCCGGCGGCTTGCACGGTGTGGGCGTCTCGGTGGTGAACGCGCTGTCCCATGAACTACGC…	ATGCTGATCCTGCGCGGCGCTCCCGCCCTTTCCGCTTTCCGCCACGGCAAACTGCTCGAGCAACTGACCCAGCACGTACCTGCCGTTACCGGGCTGTACGCTGAGTTCGCGCATTTCGCCGACGTCACCGGCGCGCTCACCGCCGACGAGGAGCAGGTGCTGGCGCGGCTGCTGAAATACGGCCCGAGCGTGCCGGTGCAGGAGCCCAGCGGACGGCTGTTCCTGGTGGTGCCGCGCTTCGGCACCATCTCGCCGTGGTCGAGCAAGGCCTCCGACATCGCCCGCAACTGCGGCCTGGCGAAGATCGACCGGCTGGAGCGCGGCATTGCCTACTATGTGCAGGGCGAACTGTCCGAGAGCGACGCCCAGCAGGTCGCCGCCCGCCTGCATGACCGCATG…	ATGAGCGGCCGCTCCGCTGGTTTCGCCCTGCCCAGCCGCGACGAGTGGCGGCGCGCGCTGGCCGAGTGGGCGCGCAGCGACGGGGCGACCTGGATCTACGTGTTCAAGGTGCTCTGCGCGGCCTTCCTGACCCTCTGGCTGGCGATGCGCCTGGAATTGCCGCAGCCGAGCACGGCGACCATCACCGTGTTCATCGTCATGCAGCCGCAGAGCGGCCAGGTGTTCGCCAAGAGCTTCTACCGCATCCTCGGCACCCTGGTCGGCCTCAGCGTGATGGTCACCCTGATCGCCCTGTTCGCCCAGGAGCGAGTGCTGTTCCTGCTCAGCTCGGCGATCTGGATCGGCCTCTGCACCGCCGGGGCCGCCCGCTACCGTGACTTCCGCTCCTACGCCTGCGTG…	ATGAGCGAATCCCTCGATCTGAGCCTGGAAGGGGTCGAACGCCGGTCGTTGGCCGAGTTCACCGAGCAGGCCTATCTGAACTATTCCATGTACGTGATCATGGACCGCGCCCTGCCGCATATCGGCGACGGCCTGAAACCGGTGCAGCGACGCATCGTCTACGCCATGAGCGAACTGGGGCTGGATGCCGATTCCAAGCACAAGAAGTCGGCGCGCACCGTCGGCGACGTGCTCGGCAAGTTCCACCCGCACGGCGACTCGGCCTGCTACGAGGCCATGGTGCTGATGGCGCAGCCGTTCTCCTATCGCTATCCGCTGGTGGACGGCCAGGGCAACTGGGGGGCGCCGGACGATCCCAAGTCCTTCGCCGCCATGCGTTATACCGAGGCGCGCCTGTCG…	ATGTCTTCACGCAAGATCGGGCTCAACCTGGTGGTCATCGTCGCCCTGGCCGCCCTCTTCACCGGCATCTGGGCCCTGTACAACCGTCCGGTCAGCGTACCGGACTGGCCGGAACGCATCTCCGGCTTCTCCTTCTCGCCGTTCCGCCTCAACCAGAACCCGCAGAGCGGCCGCTACCCCAGCGCCGAACAGATGCGCACCGACCTGGAACTGGTCGCCCGGCACACCCACAGCATCCGCACCTATTCGGTCCAGGGCGCGCTCGGCGACATCCCGGCGCTGGCCGAGGCGTTCGGCCTGCGCGTCAGCCTGGGCATCTGGCTCGGCCCGGACCTGGCCAGCAACGAGGCCGAGATCGCCCGCGCCATCCGCATCGCCAACGAGTCGCCGAGCGTGGTG…	ATGACCGCCATGCCCGAAGTACTTCGCGAAGATACGCTGAACATCCCCGACAGCCGTGGGCTGAATCTCTACACCTGCGATCCGGCCCTGGAGCGGCTACTGGAGGTATACCTGCCGCCGGCGTTGCTCGCCGAATGGCGGCCGCTCCTCGAACGGCTCGGCGCCCGTGCCGGCGGCGAGCTGGACGTGCTGGCGCTGGCGGCGGACAAGAACCCGCCGGTGCTGGCGCCGCGCACCCGCCGCGGCGAGGATTTGCAGAGCATTCGCAAGCATCCGGACTACGTCGCCCTCGAACGGGTGGCCTATGCCGAACTCGGCCTGGCTTCCATGAGCCATCGCCCGGACGGCCCGCCGCCGCTGGTGAAGTATGCGCTCACCCACCTGTTCGTACAGGCCGAG…	ATGTCCGAATTCTTCATCAAGCGGCCGAACTTCGCCTGGGTGGTGGCCCTGTTCATCTCCCTGGCCGGCCTGCTGGTCATTTCCAAATTGCCGGTAGCGCAGTACCCCAATGTCGCGCCGCCACAGATCACCATCACCGCCACCTATCCCGGCGCCTCGGCGAAGGTGCTGGTGGACTCCGTCACCAGTGTGCTCGAGGAGTCGCTGAACGGCGCCAAGGGCCTGCTCTACTTCGAGTCGACCAACAACTCCAACGGCACCGCCGAGATCGTCGTCACCTTCGAGCCGGGCACCGATCCGGACCTGGCCCAGGTGGACGTGCAGAACCGCCTGAAGAAAGCCGAGGCGCGCATGCCGCAGGCGGTGCTGACCCAGGGCCTGCAGGTCGAGCAGACCAGC…	ATGAGCCAGCAGCAGATGCCCGTGGCCCTCGATCCGCTGGACTTCCCGTTGCACGGCAGCCGCCTGATCGAGGCCAGCGCCGGTACCGGCAAGACGTTCACCATCGCCCTGCTATACGTACGTCTGGTCCTCGACCATGGCGGCGAGAACGCTTTCGGCCGGCCGCTGAGCCCGCCGGAAATCCTCGTGGTGACCTTCACCGATGCGGCGACCCAGGAACTCCGCGAGCGTATCCGCAGCCGCCTGGGCGAAGCGGCGCGTTGTTTCGCCGAGCCGCAGGAGCGCCACGACGGCCTGCTGGTCGCGTTGCGCCAGCAGTATCCCGCCGAGCGCTGGCCGGGCTGCGCGCGCCTGCTGCGCCTGGCCGCGGAGTGGATGGACGAGGCCGCGGTATCGACC…	ATGAGGCGCGCCAGCCTGCATATGTTGCTCTGCCAGTTCGCCATGGCCCTGGGCCTGCTCCTGAGCCTGGGCAGCGAGGCCTGGGCCGCCAGGCCGACTCCGCAGGCGGCCGTCGACCTGGAAGCGCCGGCCGCCCTGGCCGAGGACGCCAGCCTCGACCAGCTCAACGCGCAACTCGACCTGATCCGCCAGCGCGTCACCGCCGACGCCAGCGACGACCTCCTCGCCGAGTTGCGCCAGAGCGCGCTGCAAGTCCAGCGCCAGGCCGACGCCCTGCTCGCGCTGCGGGTGGCCGACATCGAGCGGCTCGACGATCAGTTGAAAGTGATCGGCCCGCCGCAGCCCGACGAGGCGGAAAGCCTCGCCGCCCAGCGCCAGGCCCTGACCCGGCAGAAGAAC…	CTGCTGTTCGCCGCAGTGGTCATCGGCTTCCCACAGCGCGCCGGCGAATGGCTGCTGGCCGCGCAGACCTGGGCCTCGCAGACCGTCGGCTGGTACTACCTGCTGGCGATGACGCTGTACCTGATCTTCGTGGTGGTCACCGCGCTTTCCGGCTACGGCAAGATCAAGCTCGGTGCCGACCACGACGAGCCGGAATTCAGCTACCTGTCCTGGGCCGGCATGCTGTTCGCCGCCGGCATCAGCATCACCCTGTTCTTCTTCTGCGTATCCGAACCGCTGACCCACTTCCTCCAGCCGCCGCAAGGCGAGGCCGGTACCCAGGAAGCCGCGCGGCAGGCCATGGAACTGCTGTTCCTGCACTGGGGCCTGCACGGCTGGGGCGTATTCGCCCTGGTGGCG…	ATGGTCCAGGGCACCACCTCGGACGCTGGCAAGAGCACCCTGGTGACCGCGCTGTGCCGCTGGCTGGCCCGGCGCGGCGTCGCGGTGGTGCCGTTCAAGCCGCAGAACATGGCGCTGAACAGCGCGGTCACCGCCGACGGCGGCGAGATCGGCCGCGCCCAGGCGGTCCAGGCCCAGGCCTGCCGGCTGGCGCCGCACACCGACATGAACCCGGTGCTGCTCAAGCCGAACACCGACATCGGCGCCCAGGTGATCATCCATGGCCGCGCGGTGACCAGCATGGACGCCGCCGCCTACCACGACTACAAGCGCGTGGCGATGGAAGCGGTGCTGGCTTCCCATGGGCGGCTCGCCGCCGCCTACCGGGTGGTGATGGCGGAGGGCGCCGGCTCGCCGGCG…	ATGGCCAGCCTGTTCCTCGGCCGCAAGGAAATCGACGACGACCTGCTCGACGACATCGAGACGCGCCTGCTGACCGCCGACGTCGGCGTCGAGGCCACCACCCTGATCGTGCAGAACCTGACCAAGCGCGTGGCGCGCAAGGAGCTGGCCGACAGCGGCGCGCTGTACAAGGCGCTGCAGGAAGAGCTGGCCAGCCTGCTGCGCCCGGTGGAGCAGCCGTTGCAGGTCGACGTCGCGCGCGAGCCCTATGTGATCCTGGTGGTCGGGGTGAACGGCGTGGGCAAGACCACCACCATCGGCAAGCTGGCGAAGAAGCTGCAACTCGAGGGCAAGAAGGTCATGCTGGCCGCCGGCGACACCTTCCGCGCCGCCGCCGTGGAGCAGTTGCAGGTCTGGGGC…	TTGCGCATCGAGAACTTCGCACCCATCGACAGCCAGGGTTTCCGTTTCCTGCTCCGGCCAGGTGACGAACCTCTGCTCGCGCTCATCGATCGCGCCCTGCCGCATATTAGCGGGCGCTACGGCGACGAACTGTTGCGCAGCTGGAGCGCCGGGAGGCGCCTGCGCTTCGACGATCCCCGGGTGACGCTGTCGCCGGCGGAACAGCGTTGGCTCTCCGCGCACCCGGTCGTGCCGGTGGTGATCAACCATTCCCTTGGCGCGCTCGGGCAACTGGATAACGAGGGGAGGCTGAGTGGTATCGGGCGTGACTATCTGGACCTGATCGGCAAGCGCAGTGGCCTGCGGTTTTCCTTCACTGGAGCACGCAACTTCGTCGAGACGAAAAGCCGACTGGATGCG…	CGAGCCACCGCCCGCGGACGACTATTACGAAGTCGATATGGATACCCTGGCCTACCTGGATGCCGCGCCCGAGCCTGACGTGGTCGTGGTGGAGGAGCCGCTGCCGGCGGCGAAGCCGGCCACCGGCCTGGCCGCGGAGTGGCTGGAGCTGTTCCCGCGGCTCGGCCTCGGCGGCCTGACCGCCAGCATCGGTGCCAACTGTACGCTGGTAGCTGCCGACGACGACCACTGGCATCTGCATCTCGATCCGGGCCAGAGCGCGCTGTTCAACGCCACCCAGCAGCGGCGGCTGAACGATGCGCTGAACCAGCACCTGGGGCGCACCCTCAAACTGGAGGTGACCCTGCAGAAGCCTGAGCAGGAGACCCCGGCCCAGGCAGCGGCACGCCGGCGTGCCGA…	ATGTCGCAGACGCCGTCCCTCGCCCAGCTCCAGCCCGCCGATGCCTTCCTGCGCCGCCACCTCGGCCCCGATCCGGCGGAACAGCAGGCCATGCTGGATTTCCTCGGAGTTTCCACTCGCGCCGAACTGATCGTGCAGACGGTGCCGCCGGCGATCCGCCTCAACCGGCCGCTGGAACTGCCCGCCGCGCTCGACGAACAGGCCGCCCTGGCGCGCCTGCGCGGCTACGCCGGGCTCAACCAGCGCTGGACCAGCCTGATCGGCATGGGCTACTACGGCACCGTGACGCCGTCGGTGATCCTCCGCAACGTGCTGGAGAATCCCGGCTGGTACACCGCCTATACGCCCTACCAGCCGGAAATCGCCCAGGGCCGCCTGGAAGCGCTGCTGAATTTCCAG…	GTGATTCTCGCCGACGAGCAGGAAGAGTTCGGCGGCAGCCTGCTGGACACCCGCGAGACCCTCGACGGCAAGCCCGCCGCCGAGTGGGTCGCGGACGCCGTGGCCGAGCTGCAAGGCCTGCCGGAAGTCATCCTGCTACCGCGCTCCACGGTCAACGGCTACCACGACCACAACTTCCTCACCATCCACGAGCGGCGCACCGACCACCTCGGCGAGGTCGCCCCGCTCGGCCAGGTCCGCCAGCGCGTGCACCGCGTACGCGCCAAGCGCGTGGTACTGGCCGCCGGCGCCCATGAGCGGCCGCTGGTCTACGGCAACAACGACCTGCCCGGCAACATGCTCGCCGGCGCGGTTTCCACCTATGTACGGCGCTACGGCGTGGCACCGGGCAAGAAACTG…	GTACGCAGCTATCTCGAATGGCTGCTGGACAACCACTTCACCTTCCTCGGCTACGAGGAATTCAGCGTCGCCGACGAGGCCGACGGCGGGCGCATGGTCTACGACGAGAAATCCTTCCTCGGCCTGACCCGTCTGCTGCGTGCCGGCCTGAGCAAGGATGACCTGCACATCGAGGACTATGCCGTCGCCTACCTGCGCGAACCGGTCCTGCTGTCCTTCGCCAAGGCTGCCCATCCGAGCCGTGTGCACCGCCCGGCCTACCCGGACTACGTGTCGATCCGCGAGCTGGACGGCAAGGGCCGGGTGATCCGCGAGTGCCGCTTCATGGGCCTGTTCACCTCCTCGGTGTACAACGAGAGCGTCAACGACATCCCCTTCATCCGCGGCAAGGTCGCCGAA…	GTGTACGGCGAATATTCTCGGGAAAGCATTGTCTGCCTGCTCGCCATACTATTATCCGGCCATCACTACTTATATATAGACCTGAAACAACCGGCGGCCTGGAATGCAGAGTTGTGCCGGCAGGTCGACTGCCGCCTGATCCTCGACTGCTCGACCACGCCGACGCCCGCCAACGGTCTTCCCTGCGTCCCGGTCAGGCACCTGCCTGCCGCTCCAGCCTCGGTCGCCCGGCCATGCTTCGCGGCGGACCAGATCGCCTACATCAACTTCTCCTCGGGCACCACCGGCCGCCCGAAAGCCATCGCCTGCACCCACGCCGGCATTACCCGTCTGTGCCTGGGCCAGTCGTTCCTCGCGTTCGCTCCGCAGATGCGCTTCCTGGTGAACTCGCCGCTGTCC…	CTGCTGGAAGAAGGTGCGGACGAGGTATTCGAGGAAATCCTCGCCGCCGCTACGTCCTACTTCCAGACGCCCATCGCGCTCATTTCCATCCTCGACCATCAGCGCCAGTGGTTTCGCGCGAGCATCGGCCTCGATATCCGGCAGACGCCGCGACGGGATTCATTCTGCGCCTATGCGATCCTGGGCAAGGGAGTATTCGAGGTGGCCGACGCCACCCTCGACCCGCGCTTCCGGGACAACCCCTATGTGCAAGGCGAACCGCGCATCCGCTTCTACGCCGGGGCTCCGCTGGCCACCGCGGAAGGTCTCAACCTCGGCAGCCTCTGCGTCATCGACCGGGAACCACGCGGGCCGCTGGCCGAGCGGGACGTCGCCATGCTCGAGCACTTCGCCCGGCTG…	ATGTCCCTGAGTGTCTTCGATCTGTTCAAGATCGGCATCGGGCCGTCCAGCTCCCACACCGTGGGGCCGATGCGTGCCGCCGCGCGCTTTGCCGAGGGGCTGAGGCGCGAGGGGTTGCTGGAGGCCACTGCCAGCGTCAAGGTCGAGCTGTACGGCTCGCTCGGCGCCACCGGCAAGGGCCACGGCAGCGACAAGGCGGTACTGCTCGGCCTGGAGGGCGAGCAGCCGGACACGGTGGATACCGCCGCGATTCCCGCTCGGCTCGATGCCATCCGTTCCAGCGGCGAGCTGCGCCTGCTCGGCGAGCGGCCGATCCGCTTCGTCGAGAAGGAACACCTTGCGCTGATCCGCAAGCCGCTGGCCTACCATCCCAATGGCATGATCTTCCGTGCCTTCGAC…	ATGAACAGAGTTTTCCTGACCCCGGCAGCCGTGGCGCTGTGCGGCGCGTCTTCCCTGAGCCTGGCCGAACCGGTCAGCCTTGCCGACCAGGTGGTGACCGCCACCCGTACCGCCCAGACCGCTTCCCAGAGCCTGGCGGCGGTGAGCGTCATCGACCGCGAGGATATCGAGCGCAGCCAGGCGCGCAGCGTGCCGGAGCTGTTGCGCCAGGTACCCGGCGTGTCGCTGGCGAACAACGGCGGTTTCGGCAAGAACACCACGCTGTTCCTGCGCGGCACCGAGTCCGACCATGTGCTGGTGCTGATCGACGGCATCAAGGTCGGCTCGGCCAGCGCCGGCCTCACCGCGTTCCAGGATTTGCCGGTGGAGCTGATCGAGCGCATCGAGGTGGTCCGCGGG…	GTGCGGGTGCTCAACTGGAGCTGGGGCATCCACCGCGTCGGCGCTCGCGACGTCGATGGCGACGAGGTGGATTCGCTGGTGCGCTCGGGGATCGCCATGAGCGGCTACGAGGAGTTGCTCGAGGAGTTCTTCCTCTGGCTGCGCAAGGAGCATCCGGACGTGCTGGTGGTCAACTCCGCCGGCAACGGCTCGTCCTACTCCGGTACCGACGAATACCGCCTGCCGTCCTCCTTCGTCACCGAGCAGTTGCTGGTGGTGGGCGGCCACCAGCGCAGCGAGCGCCAAGGCCTGGCGGTGGACGACCCGGCCTACGCGGTCAAGCGCAGCACCTCGAACGTCGACATGCGGGTGGATGTCACCGCCGCCGCCTGTACCCATGCCTCGACCCTGGAGCGGGAC…	TTGCAGGCAGCTTGCGCGTTCGGCCCGCCCGGGCGGCTATTCCGCGCCTGCGACGAGCAAGGACGCGAGGCGTTGCTGCTGCTCGCGGCGGTCGATGCCGACGAAGCGTTCTGGCAGCGCGAATGGGCATTGCGGCGCTGCCGTGCGGAGAGCCTGCCGCGAGTATTGTCGTCGCCCCGGTTGCGTCGTCATGCCTTCCAGTTGTTCGCTCCGCCGCGCTGGCCGATGCGCAGCCTGCTGGATTGGGCGCCAGCGCACCTGCCGCTGGAACCGCAATGCGCGCTGGTCCTCCTGGAGCAACTTATCGATGCGGTTCGCGCCTTGCAGCGGCGCGGCGTACAGGGCTTGTGGCTGGCGCCGCGGCAGATCCTGCTGGACGAGGGCGGGCGCCTGCTGTTC…	ATGTTCAACCCGGCCAACCAGACCCACTTCAGCCTCAGCCTCGACGGCCTCCGTCACGACCTGCAGGTTCTCGAATTCAGCGGCCACGAAGGCATCAGTCGCCCCTACCGTTTCGAACTCGAACTGGTCGGAGAGCGTGCCGGCCTCGACCTCGAAGCGTTCCTGCACCGGCCCGCCTTCCTCGCCTTCACCCCGCAGGGCCAGGGTGTCCACGGCCTGGTCTACGGCGCCGCCCAGGCCGACGCGGGCAAGCGCCTGACCCGCTATCGCCTCACCCTCGTGCCGCAACTGGCCTACCTCGCGCAGCGCAGCAACCAGCGGATCTTCCAGCACCTCACGGTGCCGCAGATCGTCGCCCTGATCCTCGAGGAGCACGGCATCCTCGCCGACGCCTACCGC…	GTGGCTCTCCATCGCCTGGCCTTTATCTTCCTGTGCCTGCCCCTCATGGCCAGCGCCGCCCCCTTCACCTCCCCCGGTGACCGCGACCTGATCCGCGACCGCCAGCAGCGCCTGCTGGACGAACAGCGCAAGCGCCTGGAGGAACTCCAGCAACTGCCCGGCAAGGGAGCGCCCGCCGCTGCGGATGCCTCCGGCGACGACGAGCGCTGCTTCGAGATCCGCCGCATCGAGCTGGAAGGCGCCGGGCACCTCGACGAAAGCGCGCGTCGCCAGTTGCTGGCGCCCTACCAGGGGCGCTGCCTGGGCGTCGGCCAGCTCAATGCGCTGCTCAAGGCCGTCACCGACCATTACCTGGATCGCGGCTACGTCACCACCCGCGCCTACCTGCCACAGCAGGAC…	ATGGGTGACCGGCACGACTACGTCGCTCTGGAATGGGTGAAAGGCGAGATCGCCGAAACCCTGAAACAGGCGCGCCAGGCGCTGGAAGCGTTCGTCGAGAACCCGCAGGACCCGACCCGCATGCGGTTCTGCCTGACCTACGTGCACCA---GGTGCAGGGCACCCTGCAGATGGTCGAGTTCTACGGCGCGGCCCTGCTCGCCGAGGAAATGGAGCAGTTGGTCCAGGCCTTGCTGGACGGTCGCGTGCCGAACCAGGGCGAGGCCCTGGAAGTGCTGATGCAGGCGATCCTGCAACTGCCGGTCTACCTCGACCGGATCCAGACCGCCCGGCGCGACCTGCCGATGGTGGTCCTGCCGCTGCTCAACGACCTGCGCGCCGCGCGCGGCGAGAAGCTG…
11	ATGACCTTCGACGCCGCGTTCCAGCAGCTCGGCGAGCGGATGGCCGGCGGGGCCCTGGCGGAAACGGCGCTGGCGCCGTTCACCCATCTGCTGATCGACGAGTTCCAGGATGTCTCGCCGCAGATCGTCCTCTGGCTACAGGCGTTGCACCGTCGCCTGGCGA---CCCAGGGCACCGCGCCGAGCCTGATGGCCATCGGCGACGACTGGCAGTCGATCTACGGCTGGCGCGGCAGTTCGCCGGAGCTGTTCATCGACTTCGACCGGCACTTCCCCTCGCGTGGGCGGGGACGCAAGAGCGCGCTGCTGGTGCTGGAAACCAACTACCGCTCCGTCGAACCGATCATTCGCGACGGCGAGAAGGTGCTGGCCGGGGTGCGTTTCAAGCAGGACAAGACC…	ATGCACCTGTTGCGCACCCAACCCGGCGGCTTCGTTCCCGACGACGGCATCGCCCACCTGGCCCAGACTCCCGCCGAGCTGGTGATCCTCTGCAGCGGCGATTCGCACCTCGCATTGCTGGCCGAGGCCGCCCGTGCGCTGCCGGACGACTACCCGAGCCTGCGCCTGGCCAACCCCATGCAGTTGCAGAACCACGCCTCGGTGGACCTCTACGTCGAGGAAGTGCTGCGGCACGCGCGGGTGATCCTGCTTTCGCTGCACGGCGGCATCGGCTACTGGCGCTACGGCGTGGAGCAACTGGTGGCGCTGGCCGAGCGCGGCGCGCTGCTGATCCCGGTGCCCGGCGACGACCGCCCCGACCCGGAGCTGAGCGCCCTCGGCAACCTGCCGGCGGAGCAG…	ATGTTCGAACGCATCATCCAATTCGCCATCGAGCAACGCTGGCTGGTCCTGCTGGCGGTGCTGGGGATGGCCGGGGTCGGCATCGGCAGCTACCAGAAGCTGTCCATCGACGCGGTCCCGGACATCACCAACGTCCAGGTGCAGATCAATACCGCCGCCCCCGGCTACTCGCCGCTGGAAGTGGAGCAGCGGATCACCTACCCGGTGGAGACCGTCATGGCCGGCCTGCCGGGTTTGCAGGAAACCCGTTCGCTGTCGCGGCCGGGGATTTCCCAGGTGACGGTGATCTTCGAGGAGGGCACCGATATCTACTTCGCCCGCCAGCAGGTCAACGAACGCCTGAGCACGGCGCGCGAGCAACTGCCGGAAGACATCTCGCCGACCCTCGGGCCGATCTCC…	ATGTCCTTCAACCTTTCCGCCTGGGCGTTGCAGAATCGCCAGATCGTCCTGTACCTGATGATCCTGCTTGGCGCGGTTGGCGCGCTGTCCTACAGCAAGCTGGGGCAGAGCGAAGACCCGCCGTTCACCTTCAAGGCCATGGTGGTGCAGACCAACTGGCCGGGTGCCAGCGCCGAAGAGGTGGCCCGGCAGGTCACCGAGCGTATCGAGAAGAAGCTGATGGAAACCGGCGACTACGATCGCATCGTGTCCTTCTCCCGCCCCGGCGTCTCGCAGGTGACCTTCATGGCCCGCGAGGACATCCATTCCAGCGAGATCCCCGAACTCTGGTACCAGATCCGCAAGAAGATCAGCGACATTCGCGCCACCTTGCCGCAAAGCATCCAGGGCCCGTTCTTC…	ATGCGCACCGAGCAACCGAAAGTCATCCACCTCAAGGACTATCAGGCGCCGGACTACCTGATCGACGAGACCCACCTGAAGTTCGAACTGTTCGAAGACCACAGCCTGGTACACGCCGAGCTGAAGCTGCGGCGCAACCCCGAGCGCGGCGCCGGCCTGCCGCCGCTGTTGCTGCATGGCCAGCAACTGGAGCTGCTGGCGCTCGAACTGGACGGCCAGGCTCTCGGCGCGGACGACTACCAACTGGACGACGAGCAGCTCGGGGTGCAACCGCGGCAGGCCGAATTCGTCCTCAGGAGCACGGTGCGTATCCATCCGGAGAGCAACACTGCGCTGGAAGGCCTGTATAAGTCCGGCAAGATGTTCTGCACCCAGTGCGAGGCCGAGGGTTTCCGCAAG…	ATGACCGATAACCTGAACCTCGGCGCCATCGACCTGGGCACCGACGACGAATTCATCGCCCGCCATATCGGCCCGCGCGCCGCCGACACCCAGGCCATGCTCCAGCGCCTGGGCTACGACTCGCTGGACGCGCTGATCGGCAACGTGATCCCGGACAGCATCAAGGGCAGCAGCGTGCTCGACCTGCCGGCCGGCATGGGCGAGGCCGAGGCGCTGGCCAGCCTGAAGGCGATCGCCGCGCGCAATCGCGCGTTGCGTTCCTTCATCGGCCAGGGCTACTACAACTGCCACACCCCGGCACCGATCCTGCGCAACCTCCTGGAGAACCCGGCCTGGTACACCGCCTACACGCCGTACCAGCCGGAAATCTCCCAGGGCCGCCTGGAGGCGCTGCTGAAC…	GCAGGTTTCCCATGACGAGCTGGTCGCTCGCCTGTCCATGGTCGGCCTCGAGGTCGACGCCGACCTGCCGGTCGCCGGCGCCTTCAGCGGCGTGGTGGTCGGCGAGGTGCTCTCGACCGAACAGCATCCGGACGCCGACAAGCTGCGCGTCTGCCAGGTCAGCAACGGCAGCGAGACCTTCCAGGTCGTCTGCGGTGCGCCCAACGTGCGCGCGGGCCTGAAGATTCCGTTCGCCATGATCGGCGCCGAACTGCCGGGCGACTTCAAGATCAAGAAAGCCAAGCTGCGCGGCGTCGAGTCCTTCGGCATGCTCTGCTCGGCCAAGGAATTGCAGATCAGCGAAGAGAACGCCGGTCTGCTCGAGCTGCCGGCCGACGCGCCGGTCGGCCAGGACGTCCG…	ATGAGCGAGAACAACACGTACGACTCTTCCAGCATCAAGGTGCTGAAGGGGCTGGATGCCGTACGCAAGCGCCCCGGCATGTACATCGGCGACACCGACGATGGCACCGGTCTGCACCACATGGTGTTCGAGGTGGTGGATAACTCCATCGACGAAGCGCTGGCCGGTTACTGCAGCGAAATCAGCATCACCATCCATACGGATGAGTCGATCACTGTCCGCGACAATGGACGCGGTATTCCGGTGGATATCCACAAGGAAGAAGGGGTTTCTGCGGCGGAAGTGATCATGACCGTCCTCCACGCCGGCGGCAAGTTCGACGACAACACCTACAAGGTGTCCGGCGGCTTGCACGGTGTGGGCGTCTCGGTGGTGAACGCGCTGTCCCATGAACTACGC…	ATGCTGATCCTGCGCGGCGCTCCCGCCCTTTCCGCTTTCCGCCACGGCAAACTGCTCGAGCAACTGACCCAGCACGTACCTGCCGTTACCGGGCTGTACGCTGAGTTCGCGCATTTCGCCGACGTCACCGGCGCGCTCACCGCCGACGAGGAGCAGGTGCTGGCGCGGCTGCTGAAATACGGCCCGAGCGTGCCGGTGCAGGAGCCCAGCGGACGGCTGTTCCTGGTGGTGCCGCGCTTCGGCACCATCTCGCCGTGGTCGAGCAAGGCCTCCGACATCGCCCGCAACTGCGGCCTGGCGAAGATCGACCGGCTGGAGCGCGGCATTGCCTACTATGTGCAGGGCGAACTGTCCGAGAGCGACGCCCAGCAGGTCGCCGCCCGCCTGCATGACCGCATG…	ATGAGTGGCCGCTCCGCTGGTTTCGCCCTGCCCAGCCGCGACGAGTGGCGGCGCGCGCTGGCCGAGTGGGCGCGCAGCGACGGGGCGACCTGGATCTACGTGTTCAAGGTGCTCTGCGCGGCCTTCCTGACCCTCTGGCTGGCGATGCGTCTGGAATTGCCGCAGCCGAGCACGGCGACCATCACCGTGTTCATCGTCATGCAGCCGCAGAGCGGCCAGGTGTTCGCCAAGAGCTTCTACCGCATCCTCGGCACCCTGGTCGGCCTCAGCGTGATGGTCACCCTGATCGCCCTGTTCGCCCAGGAGCGAGTGCTGTTCCTGCTTAGCTCGGCGATCTGGATCGGCCTCTGCACCGCCGGGGCCGCCCGCTACCGTGACTTCCGCTCCTACGCCTGCGTG…	ATGAGCGAATCCCTCGATCTGAGCCTGGAAGGGGTCGAACGCCGGTCGTTGGCCGAGTTCACCGAGCAGGCCTATCTGAATTATTCCATGTACGTGATCATGGACCGCGCCCTGCCGCATATCGGCGACGGCCTGAAGCCGGTGCAGCGACGCATCGTCTACGCCATGAGCGAACTGGGGCTGGATGCCGATTCCAAGCACAAGAAGTCGGCGCGCACCGTCGGCGACGTGCTCGGCAAGTTCCACCCGCACGGCGACTCGGCCTGCTACGAGGCCATGGTGCTGATGGCGCAGCCGTTCTCCTATCGCTATCCGCTGGTGGACGGCCAGGGCAACTGGGGGGCGCCGGACGATCCCAAGTCCTTCGCCGCCATGCGTTATACCGAGGCGCGCCTGTCG…	ATGTCTTCACGCAAGATCGGGCTCAACCTGGTGGTCATCGTCGCCCTGGCCGCCCTCTTCACCGGCATCTGGGCCCTGTACAACCGTCCGGTCAGCGTACCGGACTGGCCGGAACGCATCTCCGGCTTCTCCTTCTCGCCGTTCCGCCTCAACCAGAATCCGCAGAGCGGCCGCTACCCCAGCGCCGAACAGATGCGCGCCGACCTGGAACTGGTCGCCCGGCACACCCACAGCATCCGCACCTATTCGGTCCAGGGCGCGCTCGGCGACATCCCGGCGCTGGCCGAGGCGTTCGGCCTGCGCGTCAGCCTGGGCATCTGGCTCGGCCCGGACCTGGCCGGCAACGAGGCCGAGATCGCCCGCGCCATCCGCATCGCCAACGAGTCGCCGAGCGTGGTG…	ATGACCGCCATGCCCGAAGTACTTCGCGAAGATACGCTGAACATCCCCGACAGCCGTGGGCTGAATCTCTACACCTGCGATCCGGCCCTGGAGCGGCTGCTGGAGGTATACCTGCCGCCGGCGTTGCTCGCCGAATGGCGGCCGCTCCTCGAACGGCTCGGCGCCCGTGCCGGCGGCGAGCTGGACGTGCTGGCGCTGGCGGCGGACAAGAACCCGCCGGTGCTGGCGCCGCGCACCCGCCGCGGCGAGGATTTGCAGAGCATTCGCAAGCATCCGGACTACGTCGCCCTCGAACGGGTGGCCTATGCCGAACTTGGCCTGGCTTCCATGAGCCATCGCCCGGACGGCCCGCCGCCGCTGGTGAAGTATGCGCTCACCCACCTGTTCGTACAGGCCGAG…	ATGTCCGAATTCTTCATCAAGCGGCCGAACTTCGCCTGGGTGGTGGCCCTGTTCATCTCCCTGGCCGGCCTGCTGGTCATTTCCAAATTGCCGGTAGCGCAGTACCCCAATGTCGCGCCGCCACAGATCACCATCACCGCCACCTATCCCGGCGCCTCGGCGAAGGTGCTGGTGGACTCCGTCACCAGTGTGCTCGAGGAGTCGCTGAACGGCGCCAAGGGCCTGCTCTACTTCGAGTCGACCAACAACTCCAACGGCACCGCCGAGATCGTCGTCACCTTCGAGCCGGGCACCGATCCGGACCTGGCCCAGGTGGACGTGCAGAACCGCCTGAAGAAAGCCGAGGCGCGCATGCCGCAGGCGGTGCTGACCCAGGGCCTGCAGGTCGAGCAGACCAGC…	ATGAGCCAGCAGCAGATGCCCGTGGCCCTCGATCCGCTGGACTTCCCGTTGCACGGCAGCCGCCTGATCGAGGCCAGCGCCGGTACCGGCAAGACGTTCACCATCGCCCTGCTATACGTACGCCTGGTCCTCGACCATGGCGGCGAGAACGCTTTCGGCCGGCCGCTGAGCCCGCCGGAAATCCTCGTGGTGACCTTCACCGATGCGGCGACCCAGGAACTCCGCGAGCGTATCCGCAGCCGCCTGGGCGAAGCGGCGCGTTGTTTCGCCGAGCCGCAGGAGCGCCACGACGGCCTGCTGGTCGCGTTGCGCCAGCAGTATCCCGCCGAGCGCTGGCCGGGCTGCGCGCGCCTGCTGCGCCTGGCCGCGGAGTGGATGGACGAGGCCGCAGTATCGACC…	ATGAGGCGCGCCAGCCTGCATATGTTGCTCTGCCAGTTCGCCATGGCCCTGGGCCTGCTCCTGAGCCTGGGCAGCGAGGCCTGGGCCGCCAGGCCGGCTCCGCAGGCGGCCGTCGACCTGGAAGCGCCGGCCGCCCTGGCCGAGGACGCCAGCCTCGACCAGCTCAACGCGCAACTCGACCTGATCCGCCAGCGCGTCACCGCCGACGCCAGCGACGACCTCCTCGCCGAGTTGCGCCAGAGCGCGCTGCAAGTCCAGCGCCAGGCCGACGCCCTGCTCGCGCTGCGGGTGGCCGACATCGAGCGGCTCGACGATCAGTTGAAAGTGATCGGCCCGCCGCAGCCCGACGAGGCGGAAAGCCTCGCCGCCCAGCGCCAGGCCCTGACCCGGCAGAAGAAC…	CTGCTGTTCGCCGCAGTGGTCATCGGCTTCCCCCAGCGCGCCGGCGAATGGCTGCTGGCCGCGCAGACCTGGGCCTCGCAGACCGTCGGCTGGTACTACCTGCTGGCGATGACGCTGTACCTGATCTTCGTGGTGGTCACCGCGCTTTCCGGCTACGGCAAGATCAAGCTCGGTGCCGACCACGACGAGCCGGAATTCAGCTACCTGTCCTGGGCCGGCATGCTGTTCGCCGCCGGCATCAGCATCACCCTGTTCTTCTTCTGCGTATCCGAACCGCTGACCCACTTCCTCCAGCCGCCGCAAGGCGAGGCCGGTACCCAGGAAGCCGCGCGGCAGGCCATGGAACTGCTGTTCCTGCACTGGGGCCTGCACGGCTGGGGCGTATTCGCCCTGGTGGCG…	ATGGTCCAGGGCACCACCTCGGACGCCGGCAAGAGCACCCTGGTGACCGCGCTGTGCCGCTGGCTGGCCCGGCGCGGCGTCGCGGTGGTGCCGTTCAAGCCGCAGAACATGGCGCTGAACAGCGCGGTCACCGCCGACGGCGGCGAGATCGGCCGCGCCCAGGCGGTCCAGGCCCAGGCCTGTCGGCTGGCGCCGCACACCGACATGAACCCGGTGCTGCTCAAGCCGAACACCGACATCGGCGCCCAGGTGATCATCCATGGCCGCGCGGTGACCAGCATGGACGCCGCCGCCTATCACGACTACAAGCGCGTGGCGATGGAAGCGGTGCTGGCTTCCCATGGGCGGCTCGCCGCCGCCTACCGGGTGGTGATGGTGGAGGGCGCCGGCTCGCCGGCG…	ATGGCCAGCCTGTTCCTCGGTCGCAAGGAAATCGACGACGACCTGCTCGACGACATCGAGACGCGCCTGCTGACCGCCGACGTCGGCGTCGAGGCCACCACCCTGATCGTGCAGAACCTGACCAAGCGCGTGGCGCGCAAGGAGCTGGCCGACAGCGGCGCGCTGTACAAGGCGCTGCAGGAAGAGCTGGCCAGCCTGCTGCGCCCGGTGGAGCAGCCGTTGCAGGTCGACGTCGCGCGCGAGCCCTATGTGATCCTGGTGGTCGGGGTGAACGGCGTGGGCAAGACCACCACCATCGGCAAGCTGGCGAAGAAGCTGCAACTCGAGGGCAAGAAGGTCATGCTGGCCGCCGGCGACACCTTCCGCGCCGCCGCCGTGGAGCAGTTGCAGGTCTGGGGC…	TTGCGCATCGAGAACTTCGCACCCATCGACAGCCAGGGTTTCCGTTTCCTGCTCCGGCCAGGTGACGAACCTCTGCTCGCGCTCATCGATCGCGCCCTGCCGCATATTAGCGGGCGCTACGGCGACGAACTGTTGCGCAGCTGGAGCGCCGGGCGGCGCCTGCGCTTCGACGAGCCCCGGGTGACGCTGTCGCCGGCGGAGCAGCGTTGGCTCTCCGCGCACCCGGTCGTGCCGGTGGTGATCAACCATTCCCTTGGCGCGCTCGGACAAGTGGACAGCGAGGGGAAGCTGAGCGGTATCGGGCGTGATTACCTGGAACTGATCGGTAAGCGCAGTGGCCTGCGGTTTTCCTTCACTGGAGCACGCAACTTCGTCGAGACGAAAAGTCGACTGGATGCG…	CGAGCCACCGCCCGCAGACGACTACTACGAAGTCGACATGGATACCCTGGCCTACCTGGATGCCGCGCCCGAGCCTGACGTGGTCGTGGTGGAGGAGCCGCTGCCGGCGGCGAAGCCGGCCACCGGCCTGGCCGCGGAGTGGCTGGAGCTGTTCCCGCGGCTCGGCCTCGGCGGCCTGACCGCCAGCATCGGTGCCAACTGTACGCTGGTAGCTGCCGACGGCGACCACTGGCATCTGCATCTCGATCCGGGCCAGAGCGCGCTGTTCAACGCCACCCAGCAGCGGCGGCTGAACGATGCGCTGAACCAGCACCTGGGGCGCACCCTCAAACTGGAGGTGACCCTGCAGAAGCCTGAGCAGGAGACCCCGGCCCAGGCAGCGGCACGCCGGCGTGCCGA…	ATGTCGCAGACGCCGTCCCTCGCCCAGCTCCAGCCCGCCGATGCCTTCCTGCGCCGCCACCTCGGCCCCGATCCGGCGGAACAGCAGGCCATGCTGGATTTCCTCGGAGTTTCCACTCGCGCCGAACTGATCGTGCAGACGGTGCCGCCGGCGATCCGCCTCAACCGGCCGCTGGAACTGCCCGCCGCGCTCGACGAACAGGCCGCCCTGGCGCGCCTGCGCGGCTACGCCGGACTCAACCAGCGCTGGACCAGCCTGATCGGCATGGGCTACTACGGCACCGTGACGCCGCCGGTGATCCTCCGCAACGTGCTGGAGAATCCCGGCTGGTACACCGCCTATACGCCCTACCAGCCGGAAATCGCCCAGGGCCGCCTGGAAGCGCTGCTGAATTTCCAG…	GTGATTCTCGCCGACGAGCAGGAAGAGTTCGGCGGCAGCCTGCTGGACACCCGCGAGACCCTCGACGGCAAGCCCGCCGCCGAGTGGGTCGCGGACGCCGTGGCCGAGCTGCAAGGCCTGCCGGAAGTCATCCTGCTACCGCGCTCCACGGTCAACGGCTACCACGACCACAACTTCCTCACCATCCACGAGCGGCGCACCGACCACCTCGGCGAGGTCGCCCCGCTCGGCCAGGTCCGCCAGCGCGTGCACCGCGTACGCGCCAAGCGCGTGGTACTGGCCGCCGGCGCCCATGAGCGGCCGCTGGTCTACGGCAACAACGACCTGCCCGGCAACATGCTCGCCGGCGCGGTTTCCACCTATGTACGGCGCTACGGCGTGGCACCGGGCAAGAAACTG…	GTACGCAGCTATCTCGAATGGCTGCTGGACAACCACTTCACCTTCCTCGGCTACGAGGAATTCAGCGTCGCCGACGAGGCCGACGGCGGGCGCATGGTCTACGACGAGAAATCCTTCCTCGGCCTGACCCGTCTGCTGCGTGCCGGCCTGAGCAAGGATGACCTGCACATCGAGGACTATGCCGTCGCCTACCTGCGCGAACCGGTCCTGCTGTCCTTCGCCAAGGCTGCCCATCCGAGCCGTGTGCACCGCCCGGCCTACCCGGACTACGTGTCGATCCGCGAGCTGGACGGCAAGGGCCGGGTGATCCGCGAGTGCCGCTTCATGGGCCTGTTCACCTCCTCGGTGTACAACGAGAGCGTCAACGACATCCCCTTCATCCGCGGCAAGGTCGCCGAA…	GTGTACGGCGAATATTCTCGGGAAAGCATTGTCTGCCTGCTCGCCATACTATTATCCGGCCATCACTACTTATATATAGACCTGAAACAACCGGCGGCCTGGAATGCAGAGTTGTGCCGGCAGGTCGACTGCCGCCTGATCCTCGACTGCTCGACCACGCCGACGCCCGCCAACGGTCTTCCCTGCGTCCCGGTCAGGCACCTGCCTGCCGCTCCAGCCTCGGTCGCCCGGCCATGCTTCGCGGCGGACCAGATCGCCTACATCAACTTCTCCTCGGGCACCACCGGCCGCCCGAAAGCCATCGCCTGCACCCACGCCGGCATTACCCGTCTGTGCCTGGGCCAGTCGTTCCTCGCGTTCGCTCCGCAGATGCGCTTCCTGGTGAACTCGCCGCTGTCC…	CTGCTGGAAGAAGGTGCGGACGAGGTATTCGAGGAAATCCTCGCCGCCGCTACGTCCTACTTCCAGACGCCCATCGCGCTCATTTCCATCCTCGACCATCAGCGCCAGTGGTTTCGCGCGAGCATCGGCCTCGATATCCGGCAGACGCCGCGACGGGATTCATTCTGCGCCTATGCGATCCTGGGCAAGGGAGTATTCGAGGTGGCCGACGCCACCCTCGACCCGCGCTTCCGGGACAACCCCTATGTGCAAGGCGAACCGCGCATCCGCTTCTACGCCGGGGCTCCGCTGGCCACCGCGGAAGGTCTCAACCTCGGCAGCCTCTGCGTCATCGACCGGGAACCACGCGGGCCGCTGGCCGAGCGGGACGTCGCCATGCTCGAGCACTTCGCCCGGCTG…	ATGTCCCTGAGTGTCTTCGATCTGTTCAAGATCGGCATAGGGCCGTCCAGCTCCCACACCGTGGGGCCGATGCGTGCCGCCGCGCGCTTCGCCGAGGGGCTGAGGCGCGAGGGGTTGCTGGAGGCCACTGCCAGCGTCAAGGTCGAGCTGTACGGCTCGCTCGGCGCCACCGGCAAGGGCCACGGCAGCGACAAGGCGGTACTGCTCGGCCTGGAGGGCGAGCAGCCGGACACGGTGGATACCGCCGCGATTCCCGCTCGGCTCGATGCCATCCGTTCCAGCGGCGAGCTGCGCCTGCTCGGCGAGCGGCCGATCCGCTTCGTCGAGAAGGAACACCTGGCGCTGATCCGCAAGCCGCTGGCCTACCATCCCAACGGCATGATCTTCCGTGCCTTCGAC…	ATGAACAGAGTTTTCCTGACCCCGGCAGCCGTGGCGCTGTGCGGCGCGTCTTCCCTGAGCCTGGCCGAACCGGTCAGCCTTGCCGACCAGGTGGTGACCGCCACCCGTACCGCCCAGACCGCTTCCCAGAGCCTGGCGGCGGTGAGCGTCATCGACCGCGAGGATATCGAGCGCAGCCAGGCGCGCAGCGTGCCGGAGCTGTTGCGCCAGGTACCCGGCGTGTCGCTGGCGAACAACGGCGGTTTCGGCAAGAACACCACGCTGTTCCTGCGCGGCACCGAGTCCGACCATGTGCTGGTGCTGATCGACGGCATCAAGGTCGGCTCGGCCAGCGCTGGCCTCACCGCGTTCCAGGACTTGCCGGTGGAGCTGATCGAGCGCATCGAGGTGGTCCGCGGG…	GTGCGGGTGCTCAACTGGAGCTGGGGCATCCACCGCGTCGGCGCTCGCGACGTCGACGGCGACGAGGTGGATTCGCTGGTGCGCTCGGGGATCGCCATGAGCGGCTACGAGGAGTTGCTCGAGGAATTCTTCCTCTGGCTGCGCAAGGAGCATCCGGACGTGCTGGTGGTCAACTCCGCCGGCAACGGCTCGTCCTACTCCGGTACCGACGAATACCGCCTGCCGTCCTCCTTCGTCACCGAGCAGTTGCTGGTGGTGGGCGGCCACCAGCGCAGCGAGCGCCAAGGCCTGGCGGTGGACGACCCGGCCTACGCGGTCAAGCGCAGCACCTCGAACGTCGACATGCGGGTGGATGTCACCGCCGCCGCCTGTACCCACGCCTCGACCCTGGAGCGGGAC…	TTGCAGGCAGCTTGCGCGTTCGGCCCGCCCGGGCGGCTATTCCGCGCCTGCGACGAGCAAGGACGCGAGGCGTTGCTGCTGCTCGCGGCGGTCGATGCCGACGAAGCGTTCTGGCAGCGCGAATGGGCATTGCGGCGCTGCCGTGCGGAGAGCCTGCCGCGAGTATTGTCGTCGCCCCGGTTGCGTCGTCATGCCTTCCAGTTGTTCGCTCCGCCGCGCTGGCCGATGCGCAGCCTGCTGGATTGGGCGCCAGCGCACCTGCCGCTGGAACCGCAATGCGCGCTGGTCCTCCTGGAGCAACTTATCGATGCGGTTCGCGCCTTGCAGCGGCGCGGCGTACAGGGCTTGTGGCTGGCGCCGCGGCAGATCCTGCTGGACGAGGGCGGGCGCCTGCTGTTC…	ATGTTCAACCCGGCCAACCAGACCCACTTCAGCCTCAGCCTCGACGGCCTCCGTCACGACCTGCAGGTCCTCGCCTTCAACGGCCACGAAGGCATCAGCCGGCCCTACCGCTTCGAACTCGAACTGGTCAGCGAGCGCGCCGGCCTCGACCTCGAAGCGCTCATGCACCGGCCCGCCTTCCTCGCCTTCACCCCGCAGGGCCAGGGTGTCCACGGCCTGGTCTACGGCGCTGCCCAAGGCGATGCCGGCAAGCGCCTGACCCGCTATCGCCTCACCCTCGTGCCGCAACTGGCCTACCTCGCGCAGCGCAGCAACCAGCGGATCTTCCAGCACCTCACGGTGCCGCAGATCGTCGCCCTGATCCTCGAGGAGCACGGCATCCTCGCCGACGCCTACCGC…	GTGGCTCTCCATCGCCTGGCCTTTATCTTCCTGTGCCTGCCGCTCATGGCCAGCGCCGCCCCCTTCACCTCCCCCGGCGACCACGACCTGATCCGCGACCGCCAGCAGCGCCTGCTGGACGAACAGCGCAAGCGCCTGGAGGAACTCCAGCAACTGCCCGGCAAGGGAGCGCCCGCCGCTGCGGATGCCTCCGGCGACGACGAGCGCTGCTTCGAGATCCGCCGCATCGAGCTGGAAGGCGCCGGGCACCTCGGCGAAAGCGCGCGTCGCCAACTGCTGGCGCCCTACCAGGGGCGCTGCCTGGGCGTCGGCCAGCTCAATGCGCTGCTCAAGGCCGTCACCGACCATTACCTGGATCGCGGCTACGTCACCACCCGTGCCTACCTGCCACAGCAGGAC…	ATGGGTGACCGGCACGACTACGTCGCTCTGGAGTGGGTGAAAGGCGAGATCGCCGAAACCCTGAAACAGGCGCGCCAGGCGCTGGAAGCGTTCGTCGAGAACCCGCAGGACCCGACCCGCATGCGGTTCTGCCTGACCTACGTGCACCA---GGTGCAGGGCACCCTGCAGATGGTCGAGTTCTACGGCGCGGCCCTGCTCGCCGAGGAAATGGAGCAGTTGGTCCAGGCCTTGCTGGACGGTCGCGTGCCGAACCAGGGCGAGGCCCTGGAAGTGCTGATGCAGGCGATCCTGCAACTGCCGGTCTACCTCGACCGGATCCAGACCGCCCGGCGCGACCTGCCGATGGTGGTCCTGCCGCTGCTCAACGACCTGCGCGCCGCGCGCGGCGAGAAGCTG…
12	ATGACCTTCGACGCCGCGTTCCAGCAGCTCGGCGAGCGGATGGCCGGCGGGGCCCTGGCGGAAACGGCGCTGGCGCCGTTCACCCATCTGCTGATCGACGAGTTCCAGGATGTCTCGCCGCAGATCGTCCTCTGGCTACAGGCGTTGCACCGCCGCCTGGCGA---ACCAGGGCACCGCGCCGAGCCTGATGGCCATCGGCGACGACTGGCAGTCGATCTACGGCTGGCGCGGCAGTTCGCCGGAGCTGTTCATCGACTTCGACCGGCACTTCCCCTCGCGTGGGCGGGGACGCAAGAGCGCGCTGCTGGTGCTGGAAACCAACTACCGCTCCGTCGAACCGATCATTCGCGACGGCGAGAAGGTGCTGGCCGGGGTGCGTTTCAAGCAGGACAAGACC…	ATGCACCTGTTGCGCACCCAACCTGGCGGCTTCGTTCCCGACGACGGCATCGCCCACCTGGCCCAGACTCCCGCCGAGCTGGTGATCCTCTGCAGCGGCGATTCGCACCTGGCATTACTGGCCGAGGCCGCCCGTGCGCTGCCGGACGACTACCCGAGCCTGCGCCTGGCCAACCCCATGCAGTTGCAGAACCACGCCTCGGTGGACCTCTACGTCGACGAAGTGCTGCGGCACGCGCGGGTGATCCTGCTTTCGCTGCACGGCGGCATCGGCTACTGGCGCTACGGCGTGGAGCAACTGGTGGCGCTGGCCGAGCGCGGCGCGCTGCTGATCGCGGTGCCCGGCGACGACCGCCCCGACCCGGAGCTGAGCGCCCTCGGCAACCTGCCGGCGGAGCAG…	ATGTTCGAACGCATCATCCAATTCGCCATCGAGCAACGCTGGCTGGTCCTGCTGGCGGTGCTGGGGATGGCCGGGGTCGGCATCGGCAGCTACCAGAAGCTGTCCATCGACGCGGTCCCGGACATCACCAACGTCCAGGTGCAGATCAATACCGCCGCCCCCGGCTACTCGCCGCTGGAAGTGGAGCAGCGGATCACCTACCCGGTGGAGACCGTCATGGCCGGCCTGCCGGGTTTGCAGGAAACCCGTTCGCTGTCGCGGCCGGGGATTTCCCAGGTGACGGTGATCTTCGAGGAGGGCACCGATATCTACTTCGCCCGCCAGCAGGTCAACGAACGCCTGAGCACGGCGCGCGAGCAACTGCCGGAAGACATCTCGCCGACCCTCGGGCCGATCTCC…	ATGTCCTTCAACCTTTCCGCCTGGGCGTTGCAGAATCGCCAGATCGTCCTGTACCTGATGATCCTGCTTGGCGCGGTTGGCGCGCTGTCCTACAGCAAGCTGGGGCAGAGCGAAGACCCGCCGTTCACCTTCAAGGCCATGGTGGTGCAGACTAACTGGCCGGGTGCCAGCGCCGAAGAGGTGGCCCGGCAGGTCACCGAGCGTATCGAGAAGAAGCTGATGGAAACCGGCGACTACGATCGCATCGTGTCCTTCTCCCGCCCCGGCGTCTCGCAGGTGACCTTCATGGCCCGCGAGGACATCCATTCCAGCGAGATCCCCGAACTCTGGTACCAGATCCGCAAGAAGATCAGCGACATTCGCGCCACCTTGCCGCAAAGCATCCAGGGCCCGTTCTTC…	ATGCGCACCGAGCAACCGAAAGTCATCCACCTCAAGGACTATCAGGCGCCGGACTACCTGATCGACGAGACCCACCTGAAGTTCGAACTGTTCGAAGACCACAGCCTGGTGCACGCCGAGCTGAAGCTGCGGCGCAACCCCGAGCGCGGCGCCGGCCTGCCGCCGCTGTTGCTGCATGGTCAGCAACTGGAGCTGCTGGCGCTCGAACTGGACGGCCAGGCGCTCGGCGCGGACGACTACCAACTGGACGACGAGCAGCTCGGGGTGCAACCGCGGCAGGCCGAGTTCGTCCTCAGGAGCACGGTGCGTATCCATCCGGAGAGCAACACCGCGCTGGAAGGCCTGTACAAGTCCGGCAAGATGTTCTGCACCCAGTGCGAGGCCGAGGGTTTCCGCAAG…	ATGACCGATAACCTGAACCTCGGCGCCATCGACCTGGGCACCGACGACGAATTCATCGCCCGCCATATCGGCCCGCGTGCCGCCGACACCCAGGCCATGCTCCAGCGCCTGGGCTACGACTCGCTGGACGCGCTGATCGGCAACGTGATCCCCGACAGCATCAAGGGCAGCAGCGTGCTCGACCTGCCGGCCGGCATGGGCGAGGCCGAGGCGCTGGCCAGCCTGAAGGCGATCGCCGCGCGCAATCGCGCGTTGCGTTCCTTCATCGGCCAGGGCTACTACAACTGCCACACCCCGGCACCGATCCTGCGCAACCTCCTGGAGAACCCGGCCTGGTACACCGCCTACACGCCGTACCAGCCGGAAATCTCCCAGGGCCGCCTGGAGGCGCTGCTGAAC…	GCAGGTTTCCCATGACGAGCTGGTCGCTCGCCTGTCCATGGTCGGCCTCGAGGTTGACGCCGACCTGCCGGTCGCCGGCGCCTTCAGCGGCGTGGTGGTCGGCGAGGTGCTCTCGACCGAACAGCATCCGGACGCCGACAAGCTGCGCGTCTGCCAGGTCAGCAACGGCAGCGAGACCTTCCAGGTCGTCTGCGGTGCGCCCAACGTGCGCGCGGGCCTGAAGATTCCGTTCGCCATGATCGGCGCCGAACTGCCGGGCGACTTCAAGATCAAGAAAGCCAAGCTGCGCGGCGTCGAGTCCTTCGGCATGCTCTGCTCGGCCAAGGAATTGCAGATCAGCGAAGAGAACGCCGGTCTGCTCGAGCTGCCGGCTGACGCGCCGGTCGGCCAGGACGTCCG…	ATGAGCGAGAACAACACGTACGACTCTTCCAGCATCAAGGTGCTGAAGGGGCTGGATGCCGTACGCAAGCGCCCCGGCATGTACATCGGCGACACCGACGATGGCACCGGTCTGCACCACATGGTGTTCGAGGTGGTGGATAACTCCATCGACGAAGCGCTGGCCGGTTACTGCAGCGAAATCAGCATCACCATCCATACGGATGAGTCGATCACTGTCCGCGACAATGGACGCGGTATTCCGGTGGATATCCACAAGGAAGAAGGGGTTTCTGCGGCGGAAGTGATCATGACCGTCCTCCACGCCGGCGGCAAGTTCGACGACAACACCTACAAGGTGTCCGGCGGCTTGCACGGTGTGGGCGTCTCGGTGGTGAACGCGCTGTCCCATGAACTGCGC…	ATGCTGATCCTGCGCGGCGCTCCCGCCCTTTCCGCTTTCCGCCACGGCAAACTGCTCGAGCAACTGACCCAGCACGTACCTGCCGTTACCGGGCTGTACGCTGAGTTCGCGCATTTCGCCGACGTCACCGGCGCGCTCACCGCCGACGAGGAGCAGGTGCTGGCGCGGCTGCTGAAATACGGCCCGAGCGTGCCGGTGCAGGAGCCCAGCGGACGGCTGTTCCTGGTGGTGCCGCGCTTCGGCACCATCTCGCCGTGGTCGAGCAAGGCCTCCGACATCGCCCGCAACTGCGGCCTGGCGAAGATCGACCGGCTGGAGCGCGGCATTGCCTACTATGTGCAGGGCGAACTGTCCGAGAGCGACGCCCAGCAGGTCGCCGCCCGCCTGCATGACCGCATG…	ATGAGTGGCCGCTCCGCTGGTTTCGCCCTGCCCAGCCGCGACGAGTGGCGGCGCGCGCTGGCCGAGTGGGCGCGCAGCGACGGGGCGACCTGGATCTACGTGTTCAAGGTGCTCTGCGCGGCCTTCCTGACCCTCTGGCTGGCGATGCGCCTGGAGTTGCCGCAACCGAGCACGGCGACCATCACCGTGTTCATCGTCATGCAGCCGCAGAGCGGCCAGGTGTTTGCCAAGAGCTTCTACCGCATCCTCGGCACCCTGGTCGGCCTCAGCGTGATGGTCACCCTGATCGCCCTGTTCGCCCAGGAGCGGGTGCTGTTCCTGCTCAGCTCGGCGATCTGGATCGGTCTCTGCACCGCCGGGGCCGCCCGCTACCGTGACTTCCGCTCCTACGCCTGCGTG…	ATGAGCGAATCCCTCGATCTGAGCCTGGAAGGGGTCGAACGCCGGTCGTTGGCCGAGTTCACCGAGCAGGCCTATCTGAACTATTCCATGTACGTGATCATGGACCGCGCCCTGCCGCATATCGGCGACGGCCTGAAACCGGTGCAGCGACGCATCGTCTACGCCATGAGCGAACTGGGGCTGGATGCCGATTCCAAGCACAAGAAGTCGGCGCGCACCGTCGGCGACGTGCTCGGCAAGTTCCACCCGCACGGCGACTCGGCCTGCTACGAGGCCATGGTGCTGATGGCGCAGCCGTTCTCCTATCGCTATCCGCTGGTGGACGGCCAGGGCAACTGGGGGGCGCCGGACGATCCCAAGTCCTTCGCCGCCATGCGTTATACCGAGGCGCGCCTGTCG…	ATGTCTTCACGCAAGATCGGGCTCAACCTGGTGGTCATCGTTGCCCTGGCCGCCCTCTTCACCGGCATCTGGGCCCTGTACAACCGTCCGGTCAGCGTACCGGACTGGCCGGAACGCATCTCCGGCTTCTCCTTCTCGCCGTTCCGCCTCAACCAGAACCCGCAGAGCGGCCGCTACCCCAGCGCCGAACAGATGCGCACCGACCTGGAACTGGTCGCCCGGCACACCCACAGCATCCGCACCTATTCGGTCCAGGGCGCGCTCGGCGACATCCCGGCGCTGGCCGAGGCGTTCGGCCTGCGCGTCAGCCTGGGCATCTGGCTCGGCCCGGACCTGGCCAGCAACGAGGCCGAGATCGCCCGCGCCATCCGCATCGCCAACGAGTCGCCGAGCGTGGTG…	ATGACCGCCATGCCCGAAGTACTTCGCGAAGATACGCTGAACATCCCCGACAGCCGTGGGCTGAATCTCTACACCTGCGATCCGGCCCTGGAGCGGCTGCTGGAGGTATACCTGCCGCCGGCGTTGCTCGCCGAATGGCGGCCGCTCCTCGAACGGCTCGGCGCCCGTGCCGGCGGCGAGCTGGACGTGCTGGCGCTGGCGGCGGACAAGAACCCGCCGGTGCTGGCGCCGCGCACCCGCCGCGGCGAGGATTTGCAGAGCATTCGCAAGCATCCGGACTACGTCGCCCTCGAACAGGTGGCCTATGCCGAACTTGGCCTGGCTTCCATGAGCCATCGCCCGGACGGCCCGCCGCCGCTGGTGAAGTATGCGCTCACCCACCTGTTCGTACAGGCCGAG…	ATGTCCGAATTCTTCATCAAGCGGCCGAACTTCGCCTGGGTGGTGGCCCTGTTCATCTCCCTGGCCGGCCTGCTGGTCATTTCCAAATTGCCGGTAGCGCAGTACCCCAATGTCGCGCCGCCACAGATCACCATCACCGCCACCTATCCCGGCGCCTCGGCGAAGGTGCTGGTGGACTCCGTCACCAGTGTGCTCGAGGAGTCGCTGAACGGCGCCAAGGGCCTGCTCTACTTCGAGTCGACCAACAACTCCAACGGCACCGCCGAGATCGTCGTCACCTTCGAGCCGGGCACCGATCCGGACCTGGCCCAGGTGGACGTGCAGAACCGCCTGAAGAAAGCCGAGGCGCGCATGCCGCAGGCGGTGCTGACCCAGGGCCTGCAGGTCGAGCAGACCAGC…	ATGAGCCAGCAGCAGATGCCCGTGGCCCTCGATCCGCTGGACTTCCCGTTGCACGGCAGCCGCCTGATCGAGGCCAGCGCCGGTACCGGCAAGACGTTCACCATCGCCCTGCTATACGTACGCCTGGTCCTCGACCATGGCGGCGAGAACGCTTTCGGCCGGCCGCTGAGCCCGCCGGAAATCCTCGTGGTGACCTTCACCGATGCGGCGACCCAGGAACTCCGCGAGCGTATCCGCAGCCGCCTGGGCGAAGCGGCGCGTTGTTTCGCCGAGCCGCAGGAGCGCCACGACGGCCTGCTGGTCGCGTTGCGCCAGCAGTATCCCGCCGAGCGCTGGCCGGGCTGCGCGCGCCTGCTGCGCCTGGCCGCGGAGTGGATGGACGAGGCCGCGGTATCGACC…	ATGAGGCGCGCCAGCCTGCATATGTTGCTCTGCCAGTTCGCCATGGCCCTGGGCCTGCTCCTGAGCCTGGGCAGCGAGGCCTGGGCCGCCAGGCCGGCTCCGCAGGCGGCCGTCGACCTGGAAGCGCCGCCCGCCCTGGCCGAGGACGCCAGCCTCGACCAGCTCAACGCGCAACTCGACCTGATCCGCCAGCGCGTTACCGCCGACGCCAGCGACGACCTCCTCGCCGAGTTGCGCCAGAGCGCGCTGCAAGTCCAGCGTCAGGCCGACGCCCTGCTCGCGCTACGGGTGGCCGACATCGAGCGGCTCGACGATCAGTTGAAAGTGATCGGCCCGCCGCAGCCCGACGAGGCGGAAAGCCTCGCCGCCCAGCGCCAGGCCCTGACCCGGCAGAAGAAC…	ATGCTGTTCGCCGCAGTGGTCATCGGCTTCCCACAGCGCGCCGGCGAATGGCTGCTGGCCGCGCAGACCTGGGCCTCGCAGACCGTCGGCTGGTACTACCTGCTGGCGATGACGCTGTACCTGATCTTCGTGGTGGTCACCGCGCTTTCCGGCTACGGCAAGATCAAGCTCGGTGCCGACCACGACGAGCCGGAATTCAGCTACCTGTCCTGGGCCGGCATGCTGTTCGCCGCCGGCATCAGCATCACCCTGTTCTTCTTCTGCGTATCCGAACCGCTGACCCACTTCCTCCAGCCGCCGCAAGGCGAGGCCGGTACCCAGGAAGCCGCGCGGCAGGCCATGGAACTGCTGTTCCTGCACTGGGGCCTGCACGGCTGGGGCGTATTCGCCCTGGTGGCG…	ATGGTCCAGGGCACCACCTCGGACGCCGGCAAGAGCACCCTGGTGACCGCGCTGTGCCGCTGGCTGGCCCGGCGCGGCGTCGCGGTGGTGCCGTTCAAGCCGCAGAACATGGCGCTGAACAGCGCGGTCACCGCCGACGGCGGCGAGATCGGCCGCGCCCAGGCGGTCCAGGCCCAGGCCTGCCGGCTGGCGCCGCACACCGACATGAACCCGGTGCTGCTCAAGCCGAACACCGACATCGGCGCCCAGGTGATCATCCATGGCCGCGCGGTGACCAGCATGGACGCCGCCGCCTACCACGACTACAAGCGCGTGGCGATGGAAGCGGTGCTGGCTTCCCATGGGCGGCTCGCCGCCGCCTACCGGGTGGTGATGGTGGAGGGCGCCGGCTCGCCGGCG…	ATGGCCAGCCTGTTCCTCGGCCGCAAGGAAATCGACGACGACCTGCTCGACGACATCGAGACGCGCCTGCTGACCGCCGACGTCGGCGTCGAGGCCACCACCCTGATCGTGCAGAACCTGACCAAGCGCGTGGCGCGCAAGGAGCTGGCCGACAGCGGCGCGCTGTACAAGGCGCTGCAGGAAGAGCTGGCCAGCCTGCTGCGCCCGGTGGAGCAGCCGTTGCAGGTCGACGTCGCGCGCGAGCCCTATGTGATCCTGGTGGTCGGGGTGAACGGCGTGGGCAAGACCACCACCATCGGCAAGCTGGCGAAGAAGCTGCAACTCGAGGGCAAGAAGGTCATGCTGGCCGCCGGCGACACCTTCCGCGCCGCCGCCGTGGAGCAGTTGCAGGTCTGGGGC…	TTGCGTATCGAGAACTTCGCGCCCATCGACAGCCAGGGTTTCCGTTTCCTGCTCCGGCCGGGGGATGAGCCTCTGCTCGCGGTCCTCGATCGAGCCCTGCCGCGTATCAATGGGCGCTACGGCGACGAACTGTTGCGCAGTTGGAGCGCCGGGCGGCGCCTGCGTTTCGACGAGCCCAGGGTGACGCTTGCGCCGGCGGAACAGCGTTGGCTCTCCACGCATCCGGTCGTGCCGGTGGTGATCAACCATTCCCTTGGCGCGCTCGGGCAACTGGATAGCGAGGGGCGGCTGAGCGGTATCGGGCGTGACTATCTGGACCTGATCGGCAAGCGCAGCGGCCTGCAGTTTTCCTTCAGCGGAGCCCGAAACTTCGTCGAGGCGAAACGTCGACTGGATGCG…	CGAGCCACCGCCCGCGGACGACTATTACGAAGTCGATATGGATACCCTGGCCTACCTGGATGCCGCGCCCGAGCCTGACGTGGTCGTGGTGGAGGAGCCGCTGCCGGCGGCGAAGCCGGCCACCGGCCTGGCCGCGGAGTGGCTGGAGCTGTTCCCGCGGCTCGGCCTCGGCGGCCTGACCGCCAGCATCGGTGCCAACTGTACGCTGGTAGCTGCCGACGACGACCACTGGCATCTGCATCTCGATCCGGGCCAGAGCGCGCTGTTCAACGCCACCCAGCAGCGGCGGCTGAACGATGCGCTGAACCAGCACCTGGGGCGCACCCTCAAACTGGAGGTGACCCTGCAGAAGCCTGAGCAGGAGACCCCGGCCCAGGCAGCGGCACGCCGGCGTGCCGA…	ATGTCGCAGACGCCGTCCCTCGCCCAGCTCCAGCCCGCCGATGCCTTCCTGCGCCGCCACCTCGGCCCCGATCCTGCGGAACAGCAGGCCATGCTGGACTTCCTCGGAGTTTCCACTCGCGCCGAACTGATCGTGCAGACGGTGCCGCCGGCGATCCGCCTCAACCGGCCGCTGGAACTGCCCGCCGCGCTCGACGAACAGGCCGCCCTGGCGCGCCTGCGCGGCTACGCCGGGCTCAACCAGCGCTGGACCAGCCTGATCGGCATGGGCTACTACGGCACCGTGACGCCGTCGGTGATCCTCCGCAACGTGCTGGAGAATCCCGGCTGGTACACTGCCTATACGCCCTACCAGCCGGAAATCGCCCAGGGCCGCCTGGAAGCGCTGCTGAATTTCCAG…	GTGATTCTCGCCGACGAGCAGGAAGAGTTCGGCGGCAGCCTGCTGGACACCCGCGAGACCCTCGACGGCAAGCCCGCCGCCGAGTGGGTCGCGGACGCCGTGGCCGAGCTGCAAGGCCTGTCGGAGGTCATCCTGCTGCCGCGCTCCACGGTCAACGGCTACCACGATCACAACTTCCTCACCATCCACGAGCGGCGTACCGACCACCTCGGCGAGGTCGCCCCGCTCGGCCAGGTCCGCCAGCGTGTGCACCGCGCGCGCGCCAAGCGCGTGGTACTGGCCGCCGGCGCCCATGAGCGGCCGCTGGTCTACGGCAACAACGACCTGCCCGGCAACATGCTCGCCGGCGCGGTTTCCACCTATGTACGGCGCTACGGCGTGGCACCGGGCAAGAAACTG…	GTGCGCAGCTATCTCGAATGGCTGCTGGACAACCACTTCACCTTCCTCGGCTACGAGGAATTCAGCGTCGCCGACGAGGCCGACGGCGGGCGCATGGTCTACGACGAGAAATCCTTCCTCGGCCTGACCCGTCTGCTGCGTGCCGGCCTGAGCAAGGATGACCTGCACATCGAGGACTATGCCGTCGCCTACCTGCGCGAACCGGTCCTGCTGTCCTTCGCCAAGGCTGCCCATCCGAGCCGTGTGCACCGCCCGGCCTACCCGGACTACGTGTCGATCCGCGAGCTGGACGGCAAGGGCCGGGTGATCCGCGAGTGCCGCTTCATGGGCCTGTTCACCTCCTCGGTGTACAACGAGAGCGTCAACGACATCCCCTTCATCCGCGGCAAGGTCGCCGAA…	GTGTACGGCGAATATTCTCGGGAAAGCATTACCTGCCTGCTCGCCATACTGTTATCCGGCCATCACTACTTATATATAGACCTGAAACAACCGGCGGCCTGGAATGCAGAGTTGTGCCGGCAGGTCGACTGCCGCCTGATCCTCGACTGCTCGACCACGCCGACGCCCGCCAACGGTCTTCCCTGCGTCCCGGTCAGGCACCTGCCTGCCGCTCCAGCCTCGGTCGCCCGGCCATGCTTCGCGGCGGACCAGATCGCCTACATCAACTTCTCCTCGGGCACCACCGGCCGCCCGAAAGCCATCGCCTGCACCCACGCCGGCATTACCCGCCTGTGCCTGGGCCAGTCGTTCCTCGCGTTCGCTCCGCAGATGCGCTTCCTGGTGAACTCGCCGCTGTCC…	CTGCTGGAAGAAGGTGCGGACGAGGTATTCGAGGAAATCCTCGCCGCCGCTACGTCCTACTTCCAGACGCCCATCGCGCTCATTTCCATCCTCGACCATCAGCGCCAGTGGTTTCGCGCGAGCATCGGCCTCGATATCCGGCAGACGCCGCGACGGGATTCGTTCTGCGCCTATGCGATCCTGGGCAAGGGAGTATTCGAGGTGGCCGACGCCACCCTCGACCCGCGCTTCCGGGACAACCCCTATGTGCAAGGCGAACCGCGCATCCGCTTCTACGCCGGGGCTCCGCTGGCCACCGCGGAAGGTCTCAACCTCGGCAGCCTCTGCGTCATCGACCGGGAACCACGCGGGCCGCTGGCCGAGCGGGACGTCGCCATGCTCGAGCACTTCGCCCGGCTG…	ATGTCCCTGAGTGTCTTCGATCTGTTCAAGATCGGCATCGGGCCGTCCAGCTCCCACACCGTGGGGCCGATGCGTGCCGCCGCGCGCTTCGCCGAGGGGCTGAGGCGCGAGGGGTTGCTGGAGGCCACTGCCAGCGTCAAGGTCGAGCTGTACGGCTCGCTTGGCGCCACCGGCAAGGGCCACGGCAGCGACAAGGCGGTACTGCTCGGCCTGGAGGGCGAGCAGCCGGACAAGGTGGATACCGCCGCGATTCCCGCTCGGCTCGATGCCATCCGTTCCAGCGGCGAGCTGCGCCTGCTCGGCGAGCGGCCGATCCGCTTCGTCGAGAAGGAACACCTTGCGCTGATCCGCAAGCCGCTGGCCTACCATCCCAATGGCATGATCTTCCGTGCCTTCGAC…	ATGAACAGAGTTTTCCTGACCCCGGCAGCCGTGGCGCTGTGCGGCGCGTCTTCCCTGAGCCTGGCCGAACCGGTCAGCCTTGCCGACCAGGTGGTGACCGCTACCCGTACCGCCCAGACCGCTTCCCAGAGCCTGGCGGCAGTGAGCGTCATCGACCGCGAGGATATCGAGCGCAGCCAGGCGCGCAGCGTGCCGGAGCTGTTGCGCCAGGTACCCGGCGTGTCGCTGGCGAACAACGGCGGTTTCGGCAAGAACACCACGCTGTTCCTGCGCGGCACCGAGTCCGACCATGTACTGGTGCTGATCGACGGCATCAAGGTCGGCTCGGCCAGCGCCGGCCTCACCGCGTTCCAGGATTTGCCGGTGGAGCTGATCGAGCGCATCGAGGTGGTCCGCGGG…	GTGCGGGTGCTCAACTGGAGCTGGGGCATCCACCGCGTCGGCGCTCGCGACGTCGATGGCGACGAGGTGGATTCGCTGGTGCGCTCGGGGATTGCCATGAGCGGCTACGAGGAGTTGCTCGAGGAGTTCTTCCTCTGGCTGCGCAAGGAGCATCCGGACGTGCTGGTGGTCAACTCCGCCGGCAACGGCTCGTCCTACTCCGGTACCGACGAATACCGCCTGCCGTCCTCCTTCGTTACCGAGCAGTTGCTGGTGGTGGGCGGCCACCAGCGCAGCGAGCGCCAAGGCCTGGCGGTGGACGACCCGGCCTACGCGGTCAAGCGCAGCACCTCGAACGTCGACATGCGGGTGGATGTCACCGCCGCCGCCTGTACCCATGCCTCGACCCTGGAGCGGGAC…	TTGCAGGCAGCTTGCGCGTTCGGCCCGCCCGGGCGGCTATTCCGCGCCTGCGACGAGCAAGGACGCGAGGCGTTGCTGCTGCTCGCGGCGGTCGATGCCGACGAAGCGTTCTGGCAGCGCGAATGGGCATTGCGGCGCTGCCGTGCGGAGAGCCTGCCGCGAGTATTGTCGTCGCCCCGGTTGCGTCGTCATGCCTTCCAGTTGTTCGCTCCGCCGCGCTGGCCGATGCGCAGCCTGCTGGATTGGGCGCCAGCGCACCTGCCGCTGGAACCGCAATGCGCGCTGGTCCTCCTGGAGCAACTTATCGATGCGGTTCGCGCCTTGCAGCGGCGCGGCGTACAGGGCTTGTGGCTGGCGCCGCGGCAGATCCTGCTGGACGAGGGCGGGCGCCTGCTGTTC…	ATGTTCAACCCGGCCAACCAGACCCACTTCAGCCTCAGCCTCGACGGCCTCCGTCACGACCTGCAGGTTCTCGAATTCAGCGGCCACGAAGGCATCAGCCGGCCCTACCGCTTCGAACTCGAACTGGTCAGCGAGCGCGCCGGCCTCGACCTCGAAGCGCTCATGCACCGACCCGCCTTCCTCGCCTTCACCCCGCAGGGCCAGGGCGTCCACGGGCTGGTCTACGGCGCCGCCCAGGCCGACGCGGGCAAGCGCCTGACCCGCTATCGCCTCACCCTCGTGCCGCAACTGGCCTACCTCGCGCAGCGCAGCAACCAGCGGATCTTCCAGCACCTCACGGTGCCGCAGATCGTCGCCCTGGTCCTCGAGGAGCACGGCATCCTCGCCGACGCCTACCGC…	GTGGCTCTCCATCGCCTGGCCTTTATCTTCCTGTGCCTGCCCCTCATGGCCAGCGCCGCCCCCTTCACCTCCCCCGGTGACCGCGACCTGATCCGCGACCGCCAGCAGCGCCTGCTGGACGAACAGCGCAAGCGCCTGGAGGAACTCCAGCAACTGCCCGGCAAGGGAGCGCCCGCCGCTGCGGATGCCTCCGGCGACGACGAGCGCTGCTTCGAGATTCGCCGCATCGAGCTGGAAGGCGCCGGGCACCTTGGCGAAAGCGCGCGTCGCCAGTTGCTGGCGCCCTACCAGGGGCGCTGCCTGGGCGTCGGCCAGCTCAATGCGCTGCTCAAGGCCGTCACCGACCATTACCTGGATCGCGGCTACGTCACCACCCGCGCCTACCTGCCACAGCAGGAC…	ATGGGTGACCGGCACGACTACGTCGCTCTGGAATGGGTGAAAGGCGAGATCGCCGAAACCCTGAAACAGGCGCGCCAGGCGCTGGAAGCGTTCGTCGAGAACCCGCAGGACCCGACCCGCATGCGGTTCTGCCTGACCTACGTGCACCA---GGTGCAGGGCACCCTGCAGATGGTCGAGTTCTACGGCGCGGCCCTGCTCGCCGAGGAAATGGAGCAGTTGGTCCAGGCCTTGCTGGACGGTCGCGTGCCGAACCAGGGCGAGGCCCTGGAAGTGCTGATGCAGGCGATCCTGCAACTGCCGGTCTACCTCGACCGGATCCAGACCGCCCGGCGCGACCTGCCGATGGTGGTCCTGCCGCTGCTCAACGACCTGCGCGCCGCGCGCGGCGAGAAGCTG…
13	ATGACCTTCGACGCCGCGTTCCAGCAGCTCGGCGAGCGGATGGCCGGCGGGGCTCTGGCGGAAACGGCATTGGCGCCGTTCACCCATCTGCTGATCGACGAGTTCCAGGATGTCTCGCCGCAGATCGTCCTCTGGCTACAGGCGTTGCACCGTCGCCTGGCAA---CCCAGGGCACCGCGCCGAGCCTGATGGCCATCGGCGACGACTGGCAGTCGATCTACGGCTGGCGCGGCAGTTCGCCGGAGCTGTTCATCGACTTCGACCGGCACTTCCCCTCGCGTGGGCGGGGACGCAAGAGCGCGCTGCTGGTGCTGGAAACCAACTACCGCTCCGTCGAACCGATCATTCGCGACGGCGAGAAGGTGCTGGCCGGGGTGCGTTTCAAGCAGGACAAGACC…	ATGCACCTGTTGCGCACCCAACCCGGCGGCTTCGTTCCCGACGACGGCATCGCCCACCTGGCCCAGACTCCCGCCGAGCTGGTGATCCTCTGCAGCGGCGATTCGCACCTCGCATTGCTGGCCGAGGCCGCCCGTGCGCTGCCGGACGACTACCCGAGCCTGCGCCTGGCCAACCCCATGCAGTTGCAGAACCACGCCTCGGTGGACCTCTACGTCGAGGAAGTGCTGCGGCACGCGCGGGTGATCCTGCTTTCGCTGCACGGCGGCATCGGCTACTGGCGCTACGGCGTGGAGCAACTGGTGGCGCTGGCCGAGCGCGGCGCGCTGCTGATCCCGGTGCCCGGCGACGACCGCCCCGACCCGGAGCTGAGCGCCCTCGGCAACCTGCCGGCGGAGCAG…	ATGTTCGAACGCATCATCCAATTCGCCATCGAGCAACGCTGGCTGGTCCTGCTGGCGGTGCTGGGGATGGCCGGGGTCGGCATTGGCAGCTACCAGAAGCTGTCCATCGACGCGGTCCCGGACATCACCAACGTCCAGGTGCAGATCAATACCGCCGCCCCCGGCTACTCGCCGCTGGAAGTGGAGCAGCGGATCACCTACCCGGTGGAGACCGTCATGGCCGGCCTGCCGGGTTTGCAGGAAACCCGTTCGCTGTCGCGGCCGGGGATTTCCCAGGTGACGGTGATCTTCGAGGAAGGCACCGACATCTACTTCGCCCGCCAGCAGGTCAACGAACGCCTGAGCACGGCGCGCGAGCAACTGCCGGAAGACATCTCGCCGACCCTCGGGCCGATCTCC…	ATGTCCTTCAACCTTTCCGCCTGGGCGTTGCAGAATCGCCAGATCGTCCTGTACCTGATGATCCTGCTTGGCGCGGTCGGCGCGCTGTCCTACAGCAAGCTGGGGCAGAGCGAAGACCCGCCGTTCACCTTCAAGGCCATGGTGGTGCAGACCAACTGGCCGGGCGCCAGCGCCGAAGAGGTGGCCCGGCAGGTCACCGAGCGTATCGAGAAGAAGCTGATGGAAACCGGCGACTACGATCGCATCGTGTCCTTCTCCCGCCCCGGCGTCTCGCAGGTGACCTTCATGGCCCGCGAGGACATCCATTCCAGCGAGATCCCCGAACTCTGGTACCAGATCCGCAAGAAGATCAGCGACATTCGCGCCACCTTGCCGCAAAGCATCCAGGGCCCGTTCTTC…	ATGCGCACCGAGCAACCGAAAGTCATCCACCTCAAGGACTATCAGGCGCCGGACTACCTGATCGACGAGACCCACCTGAAGTTCGAACTGTTCGAAGACCACAGCCTGGTACACGCCGAGTTGAAGCTGCGGCGCAACCCCGAGCGCGGCGCCGGCCTGCCGCCGCTGTTGCTGCATGGCCAGCAACTGGAGCTGCTGGCGCTCGAACTGGACGGCCAGGCGCTCGGCGCGGACGACTACCAACTGGACGACGAGCAGCTCGGGGTGCAACCGCGGCAGGCCGAATTCGTCCTCAGGAGCACGGTGCGTATCCATCCGGAGAGCAACACCGCGCTGGAAGGCCTGTACAAGTCCGGCAAGATGTTCTGCACCCAGTGCGAGGCCGAGGGTTTCCGCAAG…	ATGACCGATAACCTGAACCTCGGCGCCATCGACCTGGGCACCGACGACGAATTCATCGCCCGCCATATCGGCCCGCGTGCCGCCGACACCCAGGCCATGCTCCAGCGCCTGGGCTACGACTCGCTGGACGCGCTGATCGGCAACGTGATCCCCGACAGCATCAAGGGCAGCAGCGTGCTCGACCTGCCGGCCGGCATGGGCGAGGCCGAGGCGCTGGCCAGCCTGAAGGCGATCGCCGCGCGCAATCGCGCGTTGCGTTCCTTCATCGGCCAGGGCTACTACAACTGCCACACCCCGGCACCGATCCTGCGCAACCTCCTGGAGAACCCGGCCTGGTACACCGCCTACACGCCGTACCAGCCGGAAATCTCCCAGGGCCGCCTGGAGGCGCTGCTGAAC…	GCAGGTTTCCCATGACGAGCTGGTCGCTCGCCTGTCCATGGTCGGCCTCGAGGTCGACGCCGACCTGCCGGTCGCCGGCGCCTTCAGCGGCGTGGTGGTCGGCGAGGTGCTCTCGACCGAGCAGCATCCGGACGCCGACAAGCTGCGCGTCTGCCAGGTCAGCAACGGCAGCGAGACCTTCCAGGTCGTCTGCGGCGCGCCCAACGTGCGCGCGGGCCTGAAGATTCCCTTCGCCATGATCGGCGCCGAACTGCCGGGCGACTTCAAGATCAAGAAAGCCAAGCTGCGTGGCGTCGAGTCCTTCGGCATGCTCTGCTCGGCCAAGGAATTGCAGATCAGCGAAGAGAACGCCGGTCTGCTCGAGCTGCCGGCCGACGCGCCGGTCGGCCAGGACGTCCG…	ATGAGCGAGAACAACACGTACGACTCTTCCAGCATCAAGGTGCTGAAGGGGCTGGATGCCGTACGCAAGCGCCCCGGCATGTACATCGGCGACACCGACGATGGCACCGGTCTGCACCACATGGTGTTCGAGGTGGTGGATAACTCCATCGACGAAGCGCTGGCCGGTTACTGCAGCGAAATCAGCATCACCATCCATACGGATGAGTCGATCACTGTCCGCGACAATGGACGCGGTATTCCGGTGGATATCCACAAGGAAGAAGGGGTTTCTGCGGCGGAAGTGATCATGACCGTCCTCCACGCCGGCGGCAAGTTCGACGACAACACCTACAAGGTGTCCGGCGGCTTGCACGGTGTGGGCGTCTCGGTGGTGAACGCGCTGTCCCATGAACTACGC…	ATGCTGATCCTGCGCGGCGCTCCCGCCCTTTCCGCTTTCCGCCACGGCAAACTGCTCGAGCAACTGACCCAGCACGTACCTGCCGTTACCGGGCTGTACGCTGAGTTCGCGCATTTCGCCGACGTCACCGGCGCGCTCACCGCCGACGAGGAGCAGGTGCTGGCGCGGCTGCTGAAATACGGCCCGAGCGTGCCGGTGCAGGAGCCCAGCGGCCGGCTGTTCCTGGTGGTGCCGCGCTTCGGCACCATCTCGCCGTGGTCGAGCAAGGCCTCCGACATCGCCCGCAACTGCGGCCTGGCGAAGATCGACCGGCTGGAGCGCGGCATTGCCTACTATGTGCAGGGCGAACTGTCCGAGAGCGACGCCCAGCAGGTCGCCGCCCGCCTGCATGACCGCATG…	ATGAGCGGCCGCTCCGCTGGTTTCGCCCTGCCCAGCCGCGACGAGTGGCGGCGCGCGCTGGCCGAGTGGGCGCGCAGCGACGGGGCGACCTGGATCTACGTGTTCAAGGTGCTCTGCGCGGCCTTCCTGACCCTCTGGCTGGCGATGCGCCTGGAATTGCCGCAGCCGAGCACGGCGACCATCACCGTGTTCATCGTCATGCAGCCGCAGAGCGGCCAGGTGTTCGCCAAGAGCTTCTACCGCATTCTCGGCACCCTGGTCGGCCTCAGCGTGATGGTCACCCTGATCGCCCTGTTCGCCCAGGAGCGAGTGCTGTTCCTGCTCAGCTCGGCGATCTGGATCGGCCTCTGCACCGCCGGGGCCGCCCGCTACCGTGACTTCCGTTCCTACGCCTGCGTG…	ATGAGCGAATCCCTCGATCTGAGCCTGGAAGGGGTCGAACGCCGGTCGTTGGCCGAGTTCACCGAGCAGGCCTATCTGAATTATTCCATGTACGTGATCATGGACCGCGCCCTGCCGCATATCGGCGACGGCCTGAAGCCGGTGCAGCGACGCATCGTCTACGCCATGAGCGAACTGGGGCTGGATGCCGATTCCAAGCACAAGAAGTCGGCGCGCACCGTCGGCGACGTGCTCGGCAAGTTCCACCCGCACGGCGACTCGGCCTGCTACGAGGCCATGGTGCTGATGGCGCAGCCGTTCTCCTATCGCTATCCGCTGGTGGACGGCCAGGGCAACTGGGGGGCGCCGGACGATCCCAAGTCCTTCGCCGCCATGCGTTATACCGAGGCGCGCCTGTCG…	ATGTCTTCACGCAAGATCGGGCTCAACCTGGTGGTCATCGTCGCCCTGGCCGCCCTCTTCACCGGCATCTGGGCCCTGTACAACCGTCCGGTCAGCGTACCGGACTGGCCGGAACGCATCTCCGGCTTCTCCTTCTCGCCGTTCCGCCTCAACCAGAACCCGCAGAGCGGCCGCTACCCCAGCGCCGAACAGATGCGCACCGACCTGGAACTGGTCGCCCGGCACACCCACAGCATCCGCACCTATTCGGTCCAGGGCGCGCTCGGCGACATCCCGGCGTTGGCCGAGGCGTTCGGCCTGCGCGTCAGCCTGGGCATCTGGCTCGGCCCGGACCTGGCCAGCAACGAGGCCGAGATCGCCCGCGCCATCCGCATCGCCAACGAGTCGCCGAGCGTGGTG…	ATGACCGCCATGCCCGAAGTACTTCGCGAAGATACGCTGAACATCCCCGACAGCCGTGGGCTGAATCTCTACACCTGCGATCCGGCCCTGGAGCGGCTGCTGGAGGTATACCTGCCGCCGGCGTTGCTCGCCGAATGGCGGCCGCTCCTCGAACGGCTCGGCGCCCGTGCCGGCGGCGAGCTGGACGTGCTGGCGCTGGCGGCGGACAAGAACCCGCCGGTGCTGGCGCCGCGCACCCGCCGCGGCGAGGATTTGCAGAGCATTCGCAAGCATCCGGACTACGTCGCCCTCGAACGGGTGGCCTATGCCGAACTTGGCCTGGCTTCCATGAGCCATCGCCCGGACGGCCCGCCGCCGCTGGTCAAGTATGCGCTCACCCACCTGTTCGTACAGGCCGAG…	ATGTCCGAATTCTTCATCAAGCGGCCGAACTTCGCCTGGGTGGTGGCCCTGTTCATCTCCCTGGCCGGCCTGCTGGTCATTTCCAAATTGCCGGTAGCGCAGTACCCCAATGTCGCGCCGCCACAGATCACCATCACCGCCACCTATCCCGGCGCCTCGGCGAAGGTGCTGGTGGACTCCGTCACCAGTGTGCTCGAGGAGTCGCTGAACGGCGCCAAGGGCCTGCTCTACTTCGAGTCGACCAACAACTCCAACGGCACCGCCGAGATCGTCGTCACCTTCGAGCCGGGCACCGATCCGGACCTGGCCCAGGTGGACGTGCAGAACCGCCTGAAGAAAGCCGAGGCGCGCATGCCGCAGGCGGTGCTGACCCAGGGCCTGCAGGTCGAGCAGACCAGC…	ATGAGCCAGCAGCAGATGCCCGTGGCCCTCGATCCGCTGGACTTCCCGTTGCACGGCAGCCGCCTGATCGAGGCCAGCGCCGGTACCGGCAAGACGTTCACCATCGCCCTGCTATACGTACGCCTGGTCCTCGACCATGGCGGCGAGAACGCTTTCGGCCGGCCGCTGAGCCCGCCGGAAATCCTCGTGGTGACCTTCACCGATGCGGCGACCCAGGAACTCCGCGAGCGTATCCGCAGCCGCCTGGGCGAAGCGGCGCGTTGTTTCGCCGAGCCGCAGGAGCGCCACGACGGCCTGCTGGTCGCGTTGCGCCAGCAGTATCCCGCCGAGCGCTGGCCGGGCTGCGCGCGCCTGCTGCGCCTGGCCGCGGAGTGGATGGACGAGGCCGCGGTATCGACC…	ATGAGGCGCGCCAGCCTGCATATGTTGCTCTGCCAGTTCGCCATGGCCCTGGGCCTGCTCCTGAGCCTGGGCAGCGAGGCCTGGGCCGCCAGGCCGGCTCCGCAGGCGGCCGTCGACCTGGAAGCGCCGGCCGCCCTGGCCGAGGACGCCAGCCTCGACCAGCTCAACGCGCAACTCGACCTGATCCGCCAGCGCGTCACCACTGACGCCAGCGACGACCTCCTCGCCGAGTTGCGCCAGAGCGCGCTGCAAGTCCAGCGCCAGGCCGACGCCCTGCTCGCGCTGCGGGTGGCCGACATCGAGCGGCTCGACGATCAGTTGAAAGTGATCGGCCCGCCGCAGCCCGACGAGGCGGAAAGCCTCGCCGCCCAGCGCCAGGCCCTGACCCGGCAGAAGAAC…	CTGCTGTTCGCCGCAGTGGTCATCGGCTTCCCCCAGCGCGCCGGCGAATGGCTGCTGGCCGCGCAGACCTGGGCCTCGCAGACCGTCGGCTGGTACTACCTGCTGGCGATGACGCTGTACCTGATCTTCGTGGTGGTCACCGCGCTTTCCGGCTACGGCAAGATCAAGCTCGGTGCCGACCACGACGAGCCGGAATTCAGCTACCTGTCCTGGGCCGGCATGCTGTTCGCCGCCGGCATCAGCATCACCCTGTTCTTCTTCTGCGTATCCGAACCGCTGACCCACTTCCTCCAGCCGCCGCAAGGCGAGGCCGGTACCCAGGAAGCCGCGCGGCAGGCCATGGAACTGCTGTTCCTGCACTGGGGCCTGCACGGCTGGGGCGTATTCGCCCTGGTGGCG…	ATGGTCCAGGGCACCACCTCGGACGCCGGCAAGAGCACCCTGGTGACCGCGCTGTGCCGCTGGCTGGCCCGGCGCGGCGTCGCGGTGGTGCCGTTCAAGCCGCAGAACATGGCGCTGAACAGCGCGGTCACCGCCGACGGCGGCGAGATCGGCCGCGCCCAGGCGGTCCAGGCCCAGGCCTGCCGGCTGGCGCCGCACACCGACATGAACCCGGTGCTGCTCAAGCCGAACACCGACATCGGCGCCCAGGTGATCATCCATGGCCGCGCGGTGACCAGCATGGACGCCGCCGCCTACCACGACTACAAGCGCGTGGCGATGGAAGCGGTGCTGGCTTCCCATGGGCGGCTCGCCGCCGCCTACCGGGTGGTGATGGTGGAGGGCGCCGGCTCGCCGGCG…	ATGGCCAGCCTGTTCCTCGGCCGCAAGGAAATCGACGACGACCTGCTCGACGACATCGAGACGCGCCTGCTGACCGCCGACGTCGGCGTCGAGGCCACCACCCTGATCGTGCAGAACCTGACCAAGCGCGTGGCGCGCAAGGAGCTGGCCGACAGCGGTGCGCTGTACAAAGCGCTGCAGGAAGAGCTGGCCAGCCTGCTGCGCCCGGTGGAGCAGCCGTTGCAGGTCGACGTCGCGCGCGAGCCCTATGTGATCCTGGTGGTCGGGGTGAACGGCGTGGGCAAGACCACCACCATCGGCAAGCTGGCGAAGAAGCTGCAACTCGAGGGCAAGAAGGTCATGCTGGCCGCCGGCGACACCTTCCGCGCCGCCGCCGTGGAGCAGTTGCAGGTCTGGGGC…	TTGCGTATCGAGAACTTCGCGCCCATCGACAGCCAGGGTTTCCGTTTCCTGCTCCGGCCGGGGGATGAGCCTCTGCTCGCGGTCCTCGATCGAGCCCTGCCGCGTATCAATGGGCGCTACGGCGACGAACTGTTGCGCAGTTGGAGCGCCGGGCGGCGCCTGCGTTTCGACGAGCCCAGGGTGACGCTTGCGCCGGCGGAACAGCGTTGGCTCTCCACGCATCCGGTCGTGCCGGTGGTGATCAACCATTCCCTTGGCGCGCTCGGGCAACTGGATAGCGAGGGGCGGCTGAGCGGTATCGGGCGTGACTATCTGGACCTGATCGGCAAGCGCAGCGGCCTGCAGTTTTCCTTCAGCGGAGCCCGAAACTTCGTCGAGGCGAAACGTCGACTGGATGTG…	CGAGCCACCGCCCGCGGACGACTATTACGAAGTCGATATGGATACCCTGGCCTACCTGGATGCCGCGCCCGAGCCTGACGTGGTCGTGGTGGAGGAGCCGCTGCCGGCGGCGAAGCCGGCCACCGGCCTGGCCGCGGAGTGGCTGGAGCTGTTCCCGCGGCTCGGCCTCGGCGGCCTGACCGCCAGCATCGGTGCCAACTGTACGCTGGTAGCTGCCGACGACGACCACTGGCATCTGCATCTCGATCCGGGCCAGAGCGCGCTGTTCAACGCCACCCAGCAGCGGCGGCTGAACGATGCGCTGAACCAGCACCTGGGGCGCACCCTCAAACTGGAGGTGACCCTGCAGAAGCCTGAGCAGGAGACCCCGGCCCAGGCAGCGGCACGCCGGCGTGCCGA…	ATGTCGCAGACGCCGTCCCTCGCCCAGCTCCAGCCCGCCGATGCCTTCCTGCGCCGCCACCTCGGCCCCGATCCTGCGGAACAGCAGGCCATGCTGGACTTCCTCGGAGTTTCCACTCGCGCCGAACTGATCGTGCAGACGGTGCCGCCGGCGATCCGCCTCAACCGGCCGCTGGAACTGCCCGCCGCGCTCGACGAACAGGCCGCCCTGGCGCGCCTGCGCGGCTACGCCGGGCTCAACCAGCGCTGGACCAGCCTGATCGGCATGGGCTACTACGGCACCGTGACGCCGTCGGTGATCCTCCGCAACGTGCTGGAGAATCCCGGCTGGTACACCGCCTATACGCCCTACCAGCCGGAAATCGCCCAGGGCCGCCTGGAAGCGCTGCTGAATTTCCAG…	GTGATCCTCGCCGACGAGCAGGAAGAGTTCGGCGGCAGCCTGCTGGACACCCGCGAGACCCTCGACGGCAAGCCCGCCGCCGAGTGGGTCGCGGACGCCGTGGCCGAGCTGCAAGGCCTGCCGGAAGTCATCCTGCTACCGCGCTCCACGGTCAACGGCTACCACGACCACAACTTCCTCACCATCCACGAGCGGCGCACCGACCACCTCGGCGAGGTCGCCCCGCTCGGCCAGGTCCGCCAGCGTGTGCACCGCGTGCGCGCCAAGCGCGTGGTACTGGCCGCCGGCGCCCATGAGCGGCCGCTGGTCTACGGCAACAACGACCTGCCCGGCAACATGCTCGCCGGCGCGGTTTCCACCTATGTACGGCGCTACGGCGTGGCACCGGGCAAGAAACTG…	GTGCGCAGCTATCTCGAATGGCTGCTGGACAACCACTTCACCTTCCTCGGCTACGAGGAATTCAGCGTCGCCGACGAGGCCGACGGCGGGCGCATGGTCTACGACGAGAAATCCTTCCTCGGCCTGACCCGTCTGCTGCGTGCCGGCCTGAGCAAGGATGACCTGCACATCGAGGACTATGCCGTCGCCTACCTGCGCGAACCGGTCCTGCTGTCCTTCGCCAAGGCTGCCCATCCGAGCCGCGTGCACCGCCCGGCCTACCCGGACTACGTGTCGATCCGCGAGCTGGACGGCAAGGGCCGGGTGATCCGCGAGTGCCGCTTCATGGGCCTGTTCACCTCCTCGGTGTACAACGAGAGCGTCAACGACATTCCCTTCATCCGCGGCAAGGTCGCCGAA…	GTGTACGGCGAATATTCTCGTGAAAGCATTGTCTGCCTGCTCGCCATACTATTATCCGGCCATCACTACTTATATATAGACCTGAAACAACCGGCGGCCTGGAATGCAGAGTTGTGCCGGCAGGTCGACTGCCGCCTGATCCTCGACTGCTCGACCACGCCGACGCCCGCCAACGGTCTTCCCTGCGTCCCGGTCAGGCACCTGCCTGCCGCTCCAGCCTCGGTCGCCCGGCCATGCTTCGCGGCGGACCAGATCGCCTACATCAACTTCTCCTCGGGCACCACCGGCCGCCCGAAAGCCATCGCCTGCATCCACGCCGGCATTACCCGTCTGTGCCTGGGCCAGTCGTTCCTCGCGTTCGCTCCGCAGATGCGCTTCCTGGTGAACTCGCCGCTGTCC…	CTGCTGGAAGAAGGTGCGGACGAGGTATTCGAGGAAATCCTCGCCGCCGCTACGTCCTACTTCCAGACGCCCATCGCGCTCATTTCCATCCTCGACCATCAGCGCCAGTGGTTTCGCGCGAGCATCGGCCTCGATATCCGGCAGACGCCGCGACGGGATTCATTCTGCGCCTATGCGATCCTGGGCAAGGGAGTATTCGAGGTGGCCGACGCCACCCTCGACCCGCGCTTCCGGGACAACCCCTATGTGCAAGGCGAACCGCGCATCCGCTTCTACGCCGGGGCTCCGCTGGCCACCGCGGAAGGTCTCAACCTCGGCAGCCTCTGCGTCATCGACCGGGAACCACGCGGGCCGCTGGCCGAGCGGGACGTCGCCATGCTCGAGCACTTCGCCCGGCTG…	ATGTCCCTGAGTGTCTTCGATCTGTTCAAGATCGGCATCGGGCCGTCCAGCTCCCACACCGTGGGGCCGATGCGTGCCGCCGCGCGCTTCGCCGAGGGGCTGAGGCGCGAGGGGTTGCTGGAGGCCACTGCCAGCGTCAAGGTCGAGCTGTACGGCTCGCTCGGCGCCACCGGCAAGGGCCACGGCAGCGACAAGGCGGTACTGCTCGGCCTGGAGGGCGAGCAGCCGGACACGGTGGATACCGCCGCGATTCCCGCCCGGCTCGATGCCATCCGTTCCAGCGGCGAGCTGCGCCTGCTCGGCGAGCGGCCGATCCGCTTCGTCGAGAAGGAACACCTGGCGCTGATCCGCAAGCCGCTGGCCTACCATCCCAACGGCATGATCTTCCGTGCCTTCGAC…	ATGAACAGAGTTTTCCTGACCCCGGCAGCCGTGGCGCTGTGCGGCGCGTCTTCCCTGAGCCTGGCCGAACCGGTCAGCCTTGCCGACCAGGTGGTGACCGCCACCCGTACCGCCCAGACCGCTTCCCAGAGCCTGGCGGCGGTGAGCGTCATCGACCGCGAGGATATCGAGCGCAGCCAGGCGCGCAGCGTGCCGGAGCTGTTGCGCCAGGTACCCGGCGTGTCGCTGGCGAACAACGGCGGTTTCGGCAAGAACACCACGCTGTTCCTGCGCGGCACCGAGTCCGACCATGTGCTGGTGCTGATCGACGGCATCAAGGTCGGCTCGGCCAGCGCCGGCCTCACCGCGTTCCAGGACTTGCCGGTGGAGCTGATCGAGCGCATCGAGGTGGTCCGCGGG…	GTGCGGGTGCTCAACTGGAGCTGGGGCATCCACCGCGTCGGCGCTCGCGACGTCGATGGCGACGAGGTGGATTCGCTGGTGCGCTCGGGGATTGCCATGAGCGGCTACGAGGAGTTGCTCGAGGAGTTCTTCCTCTGGCTGCGCAAGGAGCATCCGGACGTGCTGGTGGTCAACTCCGCCGGCAACGGCTCGTCCTACTCCGGTACCGACGAATACCGCCTGCCGTCCTCCTTCGTTACCGAGCAGTTGCTGGTGGTGGGCGGCCACCAGCGCAGCGAGCGCCAAGGCCTGGCGGTGGACGATCCGGCCTACGCGGTCAAGCGCAGCACCTCGAATGTCGACATGCGGGTGGATGTCACCGCCGCCGCCTGTACCCATGCCTCGACCCTGGAGCGGGAC…	TTGCAGGCAGCTTGCGCGTTCGGCCCGCCCGGGCGGCTATTCCGCGCCTGCGACGAGCAAGGACGCGAGGCGTTGCTGCTGCTCGCGGCGGTCGATGCCGACGAAGCGTTCTGGCAGCGCGAATGGGCATTGCGGCGCTGCCGTGCGGAGAGCCTGCCGCGAGTATTGTCGTCGCCCCGGTTGCGTCGTCATGCCTTCCAGTTGTTCGCTCCGCCGCGCTGGCCGATGCGCAGCCTGCTGGATTGGGCGCCAGCGCACCTGCCGCTGGAACCGCAATGCGCGCTGGTCCTCCTGGAGCAACTTATCGATGCGGTTCGCGCCTTGCAGCGGCGCGGCGTACAGGGCTTGTGGCTGGCGCCGCGGCAGATCCTGCTGGACGAGGGCGGGCGCCTGCTGTTC…	ATGTTCAACCCGGCCAACCAGACCCACTTCAGCCTCACCCTCGACGGCCTCCGCCACGACCTGCAGGTCCTCGCCTTCAACGGCCACGAAGGCATCAGTCGCCCCTACCGTTTCGAACTCGAACTGGTCGGAGAGCGCGCCGGCCTTGACCTCGAAACGTTCCTCCACCGGCCCGCCTTCCTCGCCTTCACCCCGCAGGGCCAGGGTGTCCACGGCCTGGTCTACGGCGCTGCCCAGGGCGATGCCGGCAAGCGCCTGACCCGCTATCGCCTCACCCTCGTCCCGCACCTGGCCTACCTCGCCCAGCGCAACAACCAGCGGATCTTCCAGCACCTCACGGTGCCGCAGATCGTCGCCCTGGTCCTCGAGGAGCACGGCATCCTCGCCGACGCCTACCGC…	GTGGCTCTCCATCGCCTGGCCTTTATCTTCCTGTGCCTGCCGCTCATGGCCAGCGCCGCCCCCTTCACCTCCCCCGGCGACCGCGACCTGATCCGCGACCGCCAGCAGCGCCTGCTGGACGAACAGCGCAAGCGCCTGGAGGAACTCCAGCAACTGCCCGGCAAGGGAGCGCCCGCCGCTGCGGATGCCTCCGGCGACGACGAGCGCTGCTTCGAGATCCGCCGCATCGAGCTGGAAGGCGCCGGGCACCTCGACGAAAGCGCGCGTCGCCAGTTGCTGGCGCCCTACCAGGGGCGCTGCCTGGGCGTCGGCCAGCTCAATGCGCTGCTCAAGGCCGTCACCGACCATTACCTGGATCGCGGCTACGTTACCACCCGCGCCTACCTGCCACAGCAGGAC…	ATGGGTGACCGGCACGACTACGTCGCTCTGGAGTGGGTGAAAGGCGAGATCGCCGAAACCCTGAAACAGGCGCGCCAGGCGCTGGAAGCGTTCGTCGAGAACCCGCAGGACCCGACCCGCATGCGGTTCTGCCTGACCTACGTGCACCA---GGTGCAGGGCACCCTGCAGATGGTCGAGTTCTACGGCGCGGCCCTGCTCGCCGAGGAAATGGAGCAGTTGGTCCAGGCCTTGCTGGACGGTCGCGTGCCGAACCAGGGCGAGGCCCTGGAAGTGCTGATGCAGGCGATCCTGCAACTGCCGGTCTACCTCGACCGGATCCAGACCGCCCGGCGCGACCTGCCGATGGTGGTCCTGCCGCTGCTCAACGACCTGCGCGCCGCGCGCGGCGAGAAGCTG…
14	ATGACCTTCGACGCCGCGTTCCAGCAGCTCGGCGAGCGGATGGCCGGCGGGGCCCTGGCGGAAACGGCATTGGCGCCGTTCACCCATCTGCTGATCGACGAGTTCCAGGATGTCTCGCCGCAGATCGTCCTCTGGCTACAGGCGTTGCACCGTCGCCTGGCGA---CCCAGGGCACCGCGCCGAGCCTGATGGCCATCGGCGACGACTGGCAGTCGATCTACGGCTGGCGCGGCAGTTCGCCGGAGCTGTTCATCGACTTCGACCGGCATTTCCCTTCGCGTGGGCGGGGACGCAAGAGCGCGCTGCTGGTGCTGGAAACCAACTACCGCTCCGTCGAACCGATCATTCGCGACGGCGAGAAGGTGCTGGCCGGGGTGCGTTTCAAGCAGGACAAGACC…	ATGCACCTGTTGCGCACCCAACCCGGCGGCTTCGTTCCCGACGACGGCATCGCCCACCTGGCCCAGACTCCCGCCGAGCTGGTGATCCTCTGCAGCGGCGATTCGCACCTCGCATTGCTGGCCGAGGCCGCCCGTGCGCTGCCGGACGACTACCCGAGCCTGCGCCTGGCCAACCCCATGCAGTTGCAGAACCACGCCTCGGTGGACCTCTACGTCGAGGAAGTGCTGCGGCACGCGCGGGTGATCCTGCTTTCGCTGCACGGCGGCATCGGCTACTGGCGCTACGGCGTGGAGCAACTGGTGGCGCTGGCCGAGCGCGGCGCGCTGCTGATCCCGGTGCCCGGCGACGACCGCCCCGACCCGGAGCTGAGCGCCCTCGGCAACCTGCCGGCGGAGCAG…	ATGTTCGAACGCATCATCCAATTCGCCATCGAGCAACGCTGGCTGGTCCTGCTGGCGGTGCTGGGGATGGCCGGGGTCGGCATTGGCAGCTACCAGAAGCTGTCCATCGACGCGGTCCCGGACATCACCAACGTCCAGGTGCAGATCAATACCGCCGCCCCCGGCTACTCGCCGCTGGAAGTGGAGCAGCGGATCACCTACCCGGTGGAGACCGTCATGGCCGGCCTGCCGGGTTTGCAGGAAACCCGTTCGCTGTCGCGGCCGGGGATTTCCCAGGTGACGGTGATCTTCGAGGAAGGCACCGACATCTACTTCGCCCGCCAGCAGGTCAACGAACGCCTGAGCACGGCGCGCGAGCAACTGCCGGAAGACATCTCGCCGACCCTCGGGCCGATCTCC…	ATGTCCTTCAACCTTTCCGCCTGGGCGTTGCAGAATCGCCAGATCGTCCTGTACCTGATGATCCTGCTTGGCGCGGTCGGCGCGCTGTCCTACAGCAAGCTGGGGCAGAGCGAAGACCCGCCGTTCACCTTCAAGGCCATGGTGGTGCAGACCAACTGGCCGGGCGCCAGCGCCGAAGAGGTGGCCCGGCAGGTCACCGAGCGTATCGAGAAGAAGCTGATGGAAACCGGCGACTACGATCGCATCGTGTCCTTCTCCCGCCCCGGCGTCTCGCAGGTGACCTTCATGGCCCGCGAGGACATCCATTCCAGCGAGATCCCCGAACTCTGGTACCAGATCCGCAAGAAGATCAGCGACATTCGCGCCACCTTGCCGCAAAGCATCCAGGGCCCGTTCTTC…	ATGCGCACCGAGCAACCGAAAGTCATCCACCTCAAGGACTATCAGGCGCCGGACTACCTGATCGACGAGACCCACCTGAAGTTCGAACTGTTCGAAGACCACAGCCTGGTACACGCCGAGTTGAAGCTGCGGCGCAACCCCGAGCGCGGCGCCGGCCTGCCGCCGCTGTTGCTGCATGGCCAGCAACTGGAGCTGCTGGCGCTCGAACTGGACGGCCAGGCGCTCGGCGCGGACGACTACCAACTGGACGACGAGCAGCTCGGGGTGCAACCGCGGCAGGCCGAATTCGTCCTCAGGAGCACGGTGCGTATCCATCCGGAGAGCAACACCGCGCTGGAAGGCCTGTACAAGTCCGGCAAGATGTTCTGCACCCAGTGCGAGGCCGAGGGTTTCCGCAAG…	ATGACCGATAACCTGAACCTCGGCGCCATCGACCTGGGCACCGACGACGAATTCATCGCCCGCCATATCGGCCCGCGTGCCGCCGACACCCAGGCCATGCTCCAGCGCCTGGGCTACGACTCGCTGGACGCGCTGATCGGCAACGTGATCCCCGACAGCATCAAGGGCAGCAGCGTGCTCGACCTGCCGGCCGGCATGGGCGAGGCCGAGGCGCTGGCCAGCCTGAAGGCGATCGCCGCGCGCAATCGCGCGTTGCGTTCCTTCATCGGCCAGGGCTACTACAACTGCCACACCCCGGCACCGATCCTGCGCAACCTCCTGGAGAACCCGGCCTGGTACACCGCCTACACGCCGTACCAGCCGGAAATCTCCCAGGGCCGCCTGGAGGCGCTGCTGAAC…	GCAGGTTTCCCATGACGAGCTGGTCGCTCGCCTGTCCATGGTCGGCCTCGAGGTCGACGCCGACCTGCCGGTCGCCGGCGCCTTCAGCGGCGTGGTGGTCGGTGAGGTGCTCTCGACCGAACAGCATCCGGACGCCGACAAGCTGCGCGTCTGCCAGGTCAGCAACGGCAGCGAGACCTTCCAGGTCGTCTGCGGTGCGCCCAACGTGCGCGCGGGCCTGAAGATTCCCTTCGCCATGATCGGCGCCGAACTGCCGGGCGACTTCAAGATCAAGAAAGCCAAGCTGCGCGGCGTCGAGTCCTTCGGCATGCTCTGCTCGGCCAAGGAATTGCAGATCAGCGAAGAGAACGCCGGTCTGCTCGAGCTGCCGGCCGACGCGCCGGTCGGCCAGGACGTCCG…	ATGAGCGAGAACAACACGTACGACTCTTCCAGCATCAAGGTGCTGAAGGGGCTGGATGCCGTACGCAAGCGCCCCGGCATGTACATCGGCGACACCGACGATGGCACCGGTCTGCACCACATGGTGTTCGAGGTGGTGGATAACTCCATCGACGAAGCGCTGGCCGGTTATTGCAGCGAAATCAGCATCACCATCCATACGGATGAGTCGATCACTGTCCGCGACAATGGACGCGGTATTCCGGTGGATATCCACAAGGAAGAAGGGGTTTCTGCGGCGGAAGTGATCATGACCGTCCTCCACGCCGGCGGCAAGTTCGACGACAACACCTACAAGGTGTCCGGCGGCTTGCACGGTGTGGGCGTCTCGGTGGTGAACGCGCTGTCCCATGAACTGCGC…	ATGCTGATCCTGCGCGGCGCTCCCGCCCTTTCCGCTTTCCGCCACGGCAAACTGCTCGAGCAACTGACCCAGCACGTACCTGCCGTTACCGGGCTGTACGCTGAGTTCGCGCATTTCGCCGACGTCACCGGCGCGCTCACCGCCGACGAGGAGCAGGTGCTGGCGCGGCTGCTGAAATACGGCCCGAGCGTGCCGGTGCAGGAGCCCAGCGGACGGCTGTTCCTGGTGGTGCCGCGCTTCGGCACCATCTCGCCGTGGTCGAGCAAGGCCTCCGACATCGCCCGCAACTGCGGCCTGGCGAAGATCGACCGGCTGGAGCGCGGCATTGCCTACTATGTGCAAGGCGAACTGTCCGAGAGCGACGCCCAGCAGGTCGCCGCCCGCCTGCATGACCGCATG…	ATGAGTGGCCGCTCCGCTGGTTTCGCCCTGCCCAGCCGCGACGAGTGGCGGCGCGCGCTGGCCGAGTGGGCGCGCAGCGACGGGGCGACCTGGATCTACGTGTTCAAGGTGCTCTGCGCGGCCTTCCTGACCCTCTGGCTGGCGATGCGCCTGGAATTGCCGCAGCCGAGCACGGCGACCATCACCGTGTTCATCGTCATGCAGCCGCAGAGCGGCCAGGTGTTCGCCAAGAGCTTCTACCGCATCCTCGGCACCCTGGTCGGCCTCAGCGTGATGGTCACCCTGATCGCCCTGTTCGCCCAGGAGCGAGTGCTGTTCCTGCTCAGCTCGGCGATCTGGATCGGCCTCTGCACCGCCGGGGCCGCCCGCTACCGTGACTTCCGCTCCTACGCCTGCGTG…	ATGAGCGAATCCCTCGATCTGAGCCTGGAAGGGGTCGAACGCCGGTCGTTGGCCGAGTTCACCGAGCAGGCCTATCTGAACTATTCCATGTACGTGATCATGGACCGCGCCCTGCCGCATATCGGCGACGGCCTGAAACCGGTGCAGCGACGCATCGTCTACGCCATGAGCGAACTGGGGCTGGATGCCGATTCCAAGCACAAGAAGTCGGCGCGCACCGTCGGCGACGTGCTCGGCAAGTTCCACCCGCACGGCGACTCGGCCTGCTACGAGGCCATGGTGCTGATGGCGCAGCCGTTCTCCTATCGCTATCCGCTGGTGGACGGCCAGGGCAACTGGGGGGCGCCGGACGATCCCAAGTCCTTCGCCGCCATGCGTTATACCGAGGCGCGCCTGTCG…	ATGTCTTCACGCAAGATCGGGCTCAACCTGGTGGTCATCGTCGCCCTGGCCGCCCTCTTCACCGGCATCTGGGCCCTGTACAACCGTCCGGTCAGCGTACCGGACTGGCCGGAACGCATCTCCGGCCTCTCCTTCTCGCCGTTCCGCCTCAACCAGAACCCGCAGAGCGGCCGCTACCCCAGCGCCGAACAGATGCGCACCGACCTGGAACTGGTCGCCCGGCACACCCACAGCATCCGCACCTATTCGGTCCAGGGCGCGCTCGGCGACATCCCGGCGCTGGCCGAGGCGTTCGGCCTGCGCGTCAGCCTGGGCATCTGGCTCGGCCCGGACCTGGCCAGCAACGAGGCCGAGATCGCCCGCGCCATCCGCATCGCCAACGAGTCGCCGAGCGTGGTG…	ATGACCGCCATGCCCGAAGTACTTCGCGAAGATACGCTGAACATCCCCGACAGCCGTGGGCTGAATCTCTACACCTGCGATCCGGCCCTGGAGCGGCTGCTGGAGGTATACCTGCCGCCGGCGTTGCTCGCCGAATGGCGGCCGCTCCTCGAACGGCTCGGCGCCCGTGCCGGCGGCGAGCTGGACGTGCTGGCGCTGGCGGCGGACAAGAACCCGCCGGTGCTGGCGCCGCGCACCCGCCGCGGCGAGGATTTGCAGAGCATTCGCAAGCATCCGGACTACGTCGCCCTCGAACGGGTGGCCTATGCAGAACTCGGCCTGGCTTCCATGAGCCATCGCCCGGACGGCCCGCCGCCGCTGGTGAAGTATGCGCTCACCCACCTGTTCGTACAGGCCGAG…	ATGTCCGAATTCTTCATCAAGCGGCCGAACTTCGCCTGGGTGGTGGCCCTGTTCATCTCCCTGGCCGGCCTGCTGGTCATTTCCAAATTGCCGGTAGCGCAGTACCCCAATGTCGCGCCGCCACAGATCACCATCACCGCCACCTATCCCGGCGCCTCGGCGAAAGTGCTGGTGGACTCCGTCACCAGCGTGCTCGAGGAGTCGCTGAACGGCGCCAAGGGCCTGCTCTACTTCGAGTCGACCAACAACTCCAACGGCAGCGCCGAGATCGTCGTCACCTTCGAGCCGGGCACCGATCCGGACCTGGCCCAGGTGGACGTGCAGAACCGCCTGAAGAAAGCCGAGGCGCGCATGCCGCAGGCGGTGCTGACCCAGGGCCTGCAGGTCGAGCAGACCAGC…	ATGAGCCAGCAGCAGATGCCCGTGGCCCTCGATCCGCTGGACTTCCCGTTGCACGGCAGCCGCCTGATCGAGGCCAGCGCCGGTACCGGCAAGACGTTCACCATCGCCCTGCTATACGTACGCCTGGTCCTCGACCATGGCGGCGAGAACGCTTTCGGCCGGCCGCTGAGCCCGCCGGAAATCCTCGTGGTGACCTTCACCGATGCGGCGACCCAGGAACTCCGCGAGCGTATCCGCAGCCGCCTGGGCGAAGCGGCGCGTTGTTTCGCCGAGCCGCAGGAGCGCCACGACGGCCTGCTGGTCGCGTTGCGCCAGCAGTATCCCGCCGAGCGCTGGCCGGGCTGCGCGCGCCTGCTGCGCCTGGCCGCGGAGTGGATGGACGAGGCCGCGGTATCGACC…	ATGAGGCGCGCCAGCCTGCATATGTTGCTCTGCCAGTTCGCCATGGCCCTGGGCCTGCTCCTGAGCCTGGGCAGCGAGGCCTGGGCCGCCAGGCCGGCTCCGCAGGCGGCCGTCGACCTGGAAGCGCCGCCCGCCCTGGCCGAGGACGCCAGCCTCGACCAGCTCAACGCGCAACTCGACCTGATCCGCCAGCGCGTTACCGCCGACGCCAGCGACGACCTCCTCGCCGAGTTGCGCCAGAGCGCGCTGCAAGTCCAGCGCCAGGCCGACGCCCTGCTCGCGCTGCGGGTGGCCGACATCGAGCGGCTCGACGATCAGTTGAAAGTGATCGGCCCGCCGCAGCCCGACGAGGCGGAAAGCCTCGCCGCCCAGCGCCAGGCCCTGACCCGGCAGAAGAAC…	CTGCTGTTCGCCGCGGTGGTCATCGGCTTCCCCCAGCGCGCCGGCGAATGGTTGCTGGCCGCACAGACCTGGGCCTCGCAGACCGTCGGTTGGTACTACCTGCTGGCGATGACGCTGTACCTGATCTTCGTGGTGGTCACCGCGCTTTCCGGCTACGGCAAGATCAAGCTCGGTGCCGACCACGACGAGCCGGAATTCAGCTACCTGTCCTGGGCCGGCATGCTGTTCGCCGCCGGCATCAGCATCACCCTGTTCTTCTTCTGCGTATCCGAGCCGCTGACCCATTTCCTCCAGCCGCCGCAAGGCGAGGCCGGTACCCAGGAAGCCGCGCGGCAGGCCATGGAACTGCTGTTCCTGCACTGGGGCCTGCACGGCTGGGGCGTGTTCGCCCTGGTGGCG…	ATGGTCCAGGGCACCACCTCGGACGCCGGCAAGAGCACCCTGGTGACCGCGCTGTGCCGCTGGCTGGCCCGGCGCGGCGTCGCGGTGGTGCCGTTCAAGCCGCAGAACATGGCGCTGAACAGCGCGGTCACCGCCGACGGCGGCGAGATCGGCCGCGCCCAGGCGGTCCAGGCCCAGGCCTGCCGGCTGGCGCCGCACACCGACATGAACCCGGTGCTGCTCAAGCCGAACACCGACATCGGCGCCCAGGTGATCATCCATGGCCGCGCGGTGACCAGCATGGACGCCGCCGCCTACCACGACTACAAGCGCGTGGCGATGGAAGCGGTGCTGGCTTCCCATGGGCGGCTCGCCGCCGCCTACCGGGTGGTGATGGTGGAGGGCGCCGGCTCGCCGGCG…	ATGGCCAGCCTGTTCCTCGGCCGCAAGGAAATCGACGACGACCTGCTCGACGACATCGAGACGCGCCTGCTGACCGCCGACGTCGGCGTCGAGGCCACCACCCTGATCGTGCAGAACCTGACCAAGCGCGTGGCGCGCAAGGAGCTGGCCGACAGCGGCGCGCTGTACAAGGCGCTGCAGGAAGAGCTGGCCAGCCTGCTGCGCCCGGTGGAGCAGCCGTTGCAGGTCGACGTCGCGCGCGAGCCCTATGTGATCCTGGTGGTTGGGGTGAACGGCGTGGGCAAGACCACCACCATCGGCAAGCTGGCGAAGAAGCTGCAACTCGAGGGCAAGAAGGTCATGCTGGCCGCCGGCGACACCTTCCGCGCCGCCGCCGTGGAGCAGTTGCAGGTCTGGGGC…	TTGCGTATCGAGAACTTCGCGCCCATCGACAGCCAGGGTTTCCGTTTCCTGCTCCGGCCGGGGGATGAGCCTCTGCTCGCGGTCCTCGATCGAGCCCTGCCGCGTATCAATGGGCGCTACGGCGACGAACTGTTGCGCAGTTGGAGCGCCGGGCGGCGCCTGCGTTTCGACGAGCCCAGGGTGACGCTTGCGCCGGCGGAACAGCGTTGGCTCTCCACGCATCCGGTCGTGCCGGTGGTGATCAACCATTCCCTTGGCGCGCTCGGGCAACTGGATAGCGAGGGGCGGCTGAGCGGTATCGGGCGTGACTATCTGGACCTGATCGGCAAGCGCAGCGGCCTGCAGTTTTCCTTCAGCGGAGCCCGAAACTTCGTCGAGGCGAAACGTCGACTGGATGCG…	CGAGCCACCGCCCGCGGACGACTACTACGAAGTCGACATGGATACCCTGGCCTACCTGGATGCCGCGCCCGAGCCTGACGTGGTCGTGGTGGAGGAGCCGCTGCCGGCGGCGAAGCCGGCCACCGGCCTGGCCGCGGAGTGGCTGGAGCTGTTCCCGCGGCTCGGCCTCGGCGGCCTGACCGCCAGCATCGCTGCCAACTGTACGCTGGTAGCTGCCGACGGCGACCACTGGCATCTGCATCTCGATCCGGGCCAGAGCGCGCTGTTCAACGCCACCCAGCAGCGGCGGCTGAACGATGCGCTGAACCAGCACCTGGGGCGCACCCTCAAACTGGAGGTGACCCTGCAGAAGCCTGAGCAGGAGACCCCGGCCCAGGCAGCGGCACGCCGGCGTGCCGA…	ATGTCGCAGACGCCGTCCCTCGACCAGCTCCAGCCCGCCGATGCCTTCCTGCGCCGCCACCTCGGCCCCGATCCGGCGGAACAGCAGGCCATGCTGGACTTCCTCGGAGTTTCCACTCGCGCCGAACTGATCGTGCAGACGGTGCCGCCGGCGATCCGCCTCAACCGGCCGCTGGAACTGCCCGCCGCGCTCGACGAACAGGCCGCCCTGGCGCGCCTGCGCGGCTACGCCGGGCTCAACCAGCGCTGGACCAGCCTGATCGGCATGGGCTACTACGGCACCGTGACGCCGCCGGTGATCCTCCGCAACGTGCTGGAGAATCCCGGCTGGTACACCGCCTATACGCCCTACCAGCCGGAAATCGCCCAGGGCCGCCTGGAAGCGCTGCTGAATTTCCAG…	GTGATTCTCGCCGACGAGCAGGAAGAGTTCGGCGGCAGCCTGCTGGACACCCGCGAGACCCTCGACGGCAAGCCCGCCGCCGAGTGGGTCGCGGACGCCGTGGCCGAGCTGCAAGGCCTGCCGGAAGTCATCCTGCTACCGCGCTCCACGGTCAACGGCTACCACGACCACAACTTCCTCACCATCCACGAGCGGCGCACCGACCACCTCGGCGAGGTCGCCCCGCTCGGCCAGGTCCGCCAGCGCGTGCACCGCGTACGCGCCAAGCGCGTGGTACTGGCCGCCGGCGCCCATGAGCGGCCGCTGGTCTACGGCAACAACGACCTGCCCGGCAACATGCTCGCCGGCGCGGTTTCCACCTATGTACGGCGCTACGGCGTGGCACCGGGCAAGAAACTG…	GTGCGCAGCTATCTCGAATGGCTGCTGGACAACCACTTCACCTTCCTCGGCTACGAGGAATTCAGCGTCGCCGACGAGGCCGACGGCGGGCGCATGGTCTACGACGAGAAATCCTTCCTCGGCCTGACCCGTCTGCTGCGTGCCGGCCTGAGCAAGGATGACCTGCACATCGAGGACTATGCCGTCGCCTACCTGCGCGAACCGGTCCTGCTGTCCTTCGCCAAGGCTGCCCATCCGAGCCGTGTGCACCGCCCGGCCTACCCGGACTACGTGTCGATCCGCGAGCTGGACGGCAAGGGCCGGGTGATCCGCGAGTGCCGCTTCATGGGCCTGTTCACGTCCTCGGTGTACAACGAGAGCGTCAACGACATCCCCTTCATCCGCGGCAAGGTCGCCGAA…	GTGTACGGCGAATATTCTCGGGAAAGCATTACCTGCCTGCTCGCCATACTGTTATCCGGCCATCACTACTTATATATAGACCTGAAACAACCGGCGGCCTGGAATGCAGAGTTGTGCCGGCAGGTCGACTGCCGCCTGATCCTCGACTGCTCGACCACGCCGACGCCGGCCAACGGTCTTCCCTGCGTCCCGGTCAGGCACCTGCCTGCCGCTCCAGCCTCGGTCGCCCGGCCATGCTTCGCGGCGGACCAGATCGCCTACATCAACTTCTCCTCGGGCACCACCGGCCGCCCGAAAGCCATCGCCTGCACCCACGCCGGCATTACCCGTCTGTGCCTGGGCCAGTCGTTCCTCGCGTTCGCTCCGCAGATGCGCTTCCTGGTGAACTCGCCGCTGTCC…	CTGCTGGAAGAAGGTGCGGACGAGGTATTCGAGGAAATCCTCGCCGCCGCTACGTCCTACTTCCAGACGCCCATCGCGCTCATTTCCATCCTCGACCATCAGCGCCAGTGGTTTCGCGCGAGCATCGGCCTCGATATCCGGCAGACGCCGCGACGGGATTCGTTCTGCGCCTATGCGATCCTGGGCAAGGGAGTCTTCGAGGTGGCCGACGCCACCCTCGACCCGCGCTTCCGGGACAACCCCTATGTGCAAGGCGAACCGCGCATCCGCTTCTACGCCGGGGCTCCGCTGGCCACCGCGGAAGGTCTCAACCTCGGCAGCCTCTGCGTCATCGACCGGGAACCACGCGGGCCGCTGGCCGAGCGGGACGTCGCCATGCTCGAGCACTTCGCCCGCCTG…	ATGTCCCTGAGTGTCTTCGATCTGTTCAAGATCGGCATCGGGCCGTCCAGCTCCCACACCGTGGGGCCGATGCGTGCCGCCGCGCGCTTTGCCGAGGGGCTGAGGCGCGAGGGGTTGCTGGAGGCCACTGCCAGCATCAAGGTCGAGCTGTACGGCTCGCTCGGCGCCACCGGCAAGGGCCACGGCAGCGACAAGGCGGTACTGCTCGGCCTGGAGGGCGAGCAGCCGGACACGGTGGATACCGCCGCGATTCCCGCTCGGCTCGATGCCATCCGTTCCAGCGGCGAGCTGCGCCTGCTCGGCGAGCGGCCGATCCGCTTCGTCGAGAAGGAACACCTTGCGCTGATCCGCAAGCCGCTGGCCTACCATCCCAACGGCATGATCTTCCGTGCCTTCGAC…	ATGAACAGAGTTTTCCTGACCCCGGCAGCCGTGGCGCTGTGCGGCGCGTCTTCCCTGAGCCTGGCCGAACCGGTCAGCCTTGCCGACCAGGTGGTGACCGCCACCCGTACCGCCCAGACCGCTTCCCAGAGCCTGGCGGCGGTGAGCGTCATCGACCGCGAGGATATCGAGCGCAGCCAGGCGCGCAGCGTGCCGGAGCTGTTGCGCCAGGTACCCGGCGTGTCGCTGGCGAACAACGGCGGTTTCGGCAAGAACACCACGCTGTTCCTGCGCGGCACCGAGTCCGACCATGTGCTGGTGCTGATCGACGGCATCAAGGTCGGCTCGGCCAGCGCTGGCCTCACCGCGTTCCAGGACTTGCCGGTGGAGCTGATCGAGCGCATCGAGGTGGTCCGCGGG…	GTGCGGGTGCTCAACTGGAGCTGGGGCATCCACCGCGTCGGCGCTCGCGACGTCGACGGCGACGAGGTGGATTCGCTGGTGCGCTCGGGGATCGCCATGAGCGGCTACGAGGAGTTGCTCGAGGAGTTCTTCCTCTGGCTGCGCAAGGAGCATCCGGACGTGCTGGTGGTCAACTCCGCCGGTAACGGCTCGTCCTACTCCGGTACCGACGAATACCGCCTGCCGTCCTCCTTCGTCACCGAGCAGTTGCTGGTGGTGGGCGGCCACCAGCGCAGCGAGCGCCAAGGCCTGGCGGTGGACGATCCGGCCTACGCGGTCAAGCGCAGCACCTCGAACGTCGACATGCGGGTGGATGTCACCGCCGCCGCCTGTACCCATGCCTCGACCCTGGAGCGGGAC…	TTGCAGGCGGCTTGCGCGTTCGGCCCACCCGGGCGGCTGTTCCGCGCCTGCGACGAGCAAGGACGCGAGGCGTTGCTGCTGCTCGCGGCGGCCGATGCCGACGAAGCGTTCTGGCAGCGCGAATGGGCACTGCGGCGCTGCCGTGCGGAGAGCCTGCCGCGAGTATTGTCGTCGCCCCGGTTGCGTCGTCATGCCTTCCAGTTGTTCGCTCCGCCGCGCTGGCCGATGCGCAGCCTGCTGGATTGGGCGCCAGCGCACCTGCCGCTGGAACCGCAATGCGCGCTGGTCCTCCTGGAACAACTTATCGATGCGGTTCGCGCCTTGCAGCGGCGCGGCGTACAGGGCTTGTGGCTGGCGCCGCGGCAGATCCTGCTGGACGAGGGCGGGCGCCTGCTGTTC…	ATGTTCAACCCGGCCAACCAGACCCACTTCAGCCTCAGCCTCGACGGCCTCCGTCACGACCTGCAGGTTCTCGAATTCAGCGGCCACGAAGGCATCAGCCGGCCCTACCGCTTCGAACTCGAACTGGTCAGCGAGCGCGCCGGCCTCGACCTCGAAGCGCTCATGCACCGGCCCGCCTTCCTCGCCTTCACCCCGCAGGGCCAGGGTGTCCACGGCCTGGTCTACGGCGCTGCCCAAGGCGATGCCGGCAAGCGCCTGACCCGCTATCGCCTCACCCTCGTCCCACACCTGGCCTACCTCGCCCAGCGCAACAACCAGCGGATCTTCCAGCACCTCACGGTGCCGCAGATCGTCGCCCTGGTCCTCGAGGAGCACGGCATCCTCGCCGACGCCTACCGC…	GTGGCTCTCCATCGCCTGGCCTTTATCTTCCTGTGCCTGCCGCTCATGGCCAGCGCCGCCCCCTTCACCTCCCCCGGCGACCGCGACCTGATCCGCGACCGCCAGCAGCGCCTGCTGGACGAACAGCGCAAGCGCCTGGAGGAACTCCAGCAACTGCCCGGCAAGGGAGCGCCCGCCGCTGCGGATGCCTCCGGCGACGACGAGCGCTGCTTCGAGATCCGCCGCATCGAGATGGAAGGCGCCGGGCACCTCGGCGAAAGCGCGCGTCGCCAACTGCTGGCGCCCTACCAGGGGCGCTGCCTGGGCGTCGGCCAGCTCAATGCGCTGCTCAAGGCCGTCACCGACCATTACCTGGATCGCGGCTACGTCACCACCCGCGCCTACCTGCCACAGCAGGAC…	ATGGGTGACCGGCACGACTACGTCGCTCTGGAATGGGTGAAAGGCGAGATCGCCGAAACCCTGAAACAGGCGCGCCAGGCGCTGGAAGCGTTCGTCGAGAACCCGCAGGACCCGACCCGCATGCGGTTCTGCCTGACCTACGTGCACCA---GGTGCAGGGCACCCTGCAGATGGTCGAGTTCTACGGCGCGGCCCTGCTCGCCGAGGAAATGGAGCAGTTGGTCCAGGCCTTGCTGGACGGTCGCGTGCCGAACCAGGGCGAGGCCCTGGAAGTGCTGATGCAGGCGATCCTGCAACTGCCGATCTACCTCGACCGGATCCAGACCGCCCGGCGCGACCTGCCGATGGTGGTCCTGCCGCTGCTCAACGACCTGCGCGCCGCGCGCGGCGAGAAGCTG…
15	ATGACCTTCGACGCCGCGTTCCAGCAGCTCGGCGAGCGGATGGCCGGCGGGGCCCTGGCGGAAACGGCGCTGGCGCCGTTCACCCATCTGCTGATCGACGAGTTCCAGGATGTCTCGCCGCAGATCGTCCTCTGGCTACAGGCGTTGCACCGTCGCCTGGCGA---CCCAGGGCACCGCGCCGAGCCTGATGGCCATCGGCGACGACTGGCAGTCGATCTACGGCTGGCGCGGCAGTTCGCCGGAGCTGTTCATCGACTTCGACCGGCACTTCCCCTCGCGTGGGCGGGGACGCAAGAGCGCGCTGCTGGTGCTGGAAACCAACTACCGCTCCGTCGAACCGATCATTCGCGACGGCGAGAAGGTGCTGGCCGGGGTGCGTTTCAAGCAGGACAAGACC…	ATGCACCTGTTGCGCACCCAACCCGGCGGCTTCGTTCCCGACGACGGCATCGCCCACCTGGCCCAGACTCCCGCCGAGCTGGTGATCCTCTGCAGCGGCGATTCGCACCTCGCATTGCTGGCCGAGGCCGCCCGTGCGCTGCCGGACGACTACCCGAGCCTGCGCCTGGCCAACCCCATGCAGTTGCAGAACCACGCCTCGGTGGACCTCTACGTCGAGGAAGTGCTGCGGCACGCGCGGGTGATCCTGCTTTCGCTGCACGGCGGCATCGGCTACTGGCGCTACGGCGTGGAGCAACTGGTGGCGCTGGCCGAGCGCGGCGCGCTGCTGATCCCGGTGCCCGGCGACGACCGCCCCGACCCGGAGCTGAGCGCCCTCGGCAACCTGCCGGCGGAGCAG…	ATGTTCGAACGCATCATCCAATTCGCCATCGAGCAACGCTGGCTGGTCCTGCTGGCGGTGCTGGGGATGGCCGGGGTCGGCATCGGCAGCTACCAGAAGCTGTCCATCGACGCGGTCCCGGACATCACCAACGTCCAGGTGCAGATCAATACCGCCGCCCCCGGCTACTCGCCGCTGGAAGTGGAGCAGCGGATCACCTACCCGGTGGAGACCGTCATGGCCGGCCTGCCGGGTTTGCAGGAAACCCGTTCGCTGTCGCGGCCGGGGATTTCCCAGGTGACGGTGATCTTCGAGGAGGGCACCGACATCTACTTCGCCCGCCAGCAGGTCAACGAACGCCTGAGCACGGCGCGCGAGCAACTGCCGGAAGACATCTCGCCGACCCTCGGGCCGATCTCC…	ATGTCCTTCAACCTTTCCGCCTGGGCGTTGCAGAATCGCCAGATCGTCCTGTACCTGATGATCCTGCTTGGCGCGGTCGGCGCGCTGTCCTACAGCAAGCTGGGGCAGAGCGAAGACCCGCCGTTCACCTTCAAGGCCATGGTGGTGCAGACCAACTGGCCGGGCGCCAGCGCCGAAGAGGTGGCCCGGCAGGTCACCGAGCGTATCGAGAAGAAGCTGATGGAAACCGGCGACTACGATCGCATCGTGTCCTTCTCCCGCCCCGGCGTCTCGCAGGTGACCTTCATGGCCCGCGAGGACATCCATTCCAGCGAGATCCCCGAACTCTGGTACCAGATCCGCAAGAAGATCAGCGACATTCGCGCCACCTTGCCGCAAAGCATCCAGGGCCCGTTCTTC…	ATGCGCACCGAGCAACCGAAAGTCATCCACCTCAAGGACTATCAGGCGCCGGACTACCTGATCGACGAGACCCACCTGAAGTTCGAACTGTTCGAAGACCACAGCCTGGTACACGCCGAGTTGAAGCTGCGGCGCAACCCCGAGCGCGGCGCCGGCCTGCCGCCGCTGTTGCTGCATGGCCAGCAACTGGAGCTGCTGGCGCTCGAACTGGACGGCCAGGCGCTCGGCGCGGACGACTACCAACTGGACGACGAGCAGCTCGGGGTGCAACCGCGGCAGGCCGAGTTCGTCCTCAGGAGCACGGTGCGTATCCATCCGGAGAGCAACACCGCGCTGGAAGGCCTGTACAAGTCCGGCAAGATGTTCTGCACCCAGTGCGAGGCCGAGGGTTTCCGCAAG…	ATGACCGATAACCTGAACCTCGGCGCCATCGACCTGGGCACCGACGACGAATTCATCGCCCGCCATATCGGCCCGCGTGCCGCCGACACCCAGGCCATGCTCCAGCGCCTGGGCTACGACTCGCTGGACACGCTGATCGGCAACGTGATCCCGGACAGCATCAAGGGCAGCAGCGTGCTCGACCTGCCGGCCGGCATGGGCGAGGCCGAGGCGCTGGCCAGCCTGAAGGCGATCGCCGCGCGCAATCGCGCGTTGCGTTCCTTCATCGGCCAGGGCTACTACAACTGCCACACCCCGGCACCGATCCTGCGCAACCTCCTGGAGAACCCGGCCTGGTACACCGCCTACACGCCGTACCAGCCGGAAATCTCCCAGGGCCGCCTGGAGGCGCTGCTGAAC…	GCAGGTTTCCCATGACGAGCTGGTCGCTCGCCTGTCCATGGTCGGCCTCGAGGTCGACGCCGACCTGCCGGTCGCCGGCGCCTTCAGCGGCGTGGTGGTCGGCGAGGTGCTCTCGACCGAACAGCATCCGGACGCCGACAAGCTGCGCGTCTGCCAGGTCAGCAACGGCAGCGAGACCTTCCAGGTCGTCTGCGGCGCGCCCAACGTGCGCGCGGGCCTGAAGATTCCCTTCGCCATGATCGGCGCCGAACTGCCGGGCGACTTCAAGATCAAGAAAGCCAAGCTGCGTGGCGTCGAGTCCTTCGGCATGCTCTGCTCGGCCAAGGAATTGCAGATCAGCGAAGAGAACGCCGGTCTGCTCGAGCTGCCGGCCGACGCGCCGGTCGGCCAGGACGTCCG…	ATGAGCGAGAACAACACGTACGACTCTTCCAGCATCAAGGTGCTGAAGGGGCTGGATGCCGTACGCAAGCGCCCCGGCATGTACATCGGCGACACCGACGATGGCACCGGTCTGCACCACATGGTGTTCGAGGTGGTGGATAACTCCATCGACGAAGCGCTGGCCGGTTACTGCAGCGAAATCAGCATCACCATCCATACGGATGAGTCGATCACTGTCCGCGACAATGGACGCGGTATTCCGGTGGATATCCACAAGGAAGAAGGGGTTTCTGCGGCGGAAGTGATCATGACCGTCCTCCACGCCGGCGGCAAGTTCGACGACAACACCTACAAAGTGTCCGGCGGCTTGCACGGTGTGGGCGTCTCGGTGGTGAACGCGCTGTCCCATGAGCTGCGC…	ATGCTGATCCTGCGCGGCGCTCCCGCCCTTTCCGCTTTCCGCCACGGCAAACTGCTCGAGCAACTGACCCAGCACGTACCTGCCGTTACCGGGCTGTACGCTGAGTTCGCGCATTTCGCCGACGTCACCGGCGCGCTCACCGCCGACGAGGAGCAGGTGCTGGCGCGGCTGCTGAAATACGGCCCGAGCGTGCCGGTGCAGGAGCCCAGCGGACGGCTGTTCCTGGTGGTGCCGCGCTTCGGCACCATCTCGCCGTGGTCGAGCAAGGCCTCCGACATCGCCCGCAACTGCGGCCTGGCGAAGATCGACCGGCTGGAGCGCGGCATTGCCTACTATGTGCAGGGCGAACTGTCCGAGAGCGACGCCCAGCAGGTCGCCGCCCGCCTGCATGACCGCATG…	ATGAGTGGCCGCTCCGCTGGTTTCGCCCTGCCCAGCCGCGACGAGTGGCGGCGCGCGCTGGCCGAGTGGGCGCGCAGCGACGGGGCGACCTGGATCTACGTGTTCAAGGTGCTCTGCGCGGCCTTCCTGACCCTCTGGCTGGCGATGCGCCTGGAATTGCCGCAGCCGAGCACGGCGACCATCACCGTGTTCATCGTCATGCAGCCGCAGAGCGGCCAGGTGTTCGCCAAGAGCTTCTACCGCATCCTCGGCACCCTGGTCGGCCTCAGCGTGATGGTCACCCTGATCGCCCTGTTCGCCCAGGAGCGAGTGCTGTTCCTGCTCAGCTCGGCGATCTGGATCGGCCTCTGCACCGCCGGGGCCGCCCGCTACCGTGACTTCCGCTCCTACGCCTGCGTG…	ATGAGCGAATCCCTCGATCTGAGCCTGGAAGGGGTCGAACGCCGGTCGTTGGCCGAGTTCACCGAGCAGGCCTATCTGAATTATTCCATGTACGTGATCATGGACCGCGCCCTGCCGCATATCGGCGACGGCCTGAAGCCGGTGCAGCGACGCATCGTCTACGCCATGAGCGAACTGGGGCTGGATGCCGATTCCAAGCACAAGAAGTCGGCGCGCACCGTCGGCGACGTGCTCGGCAAGTTCCACCCGCACGGCGACTCGGCCTGCTACGAGGCCATGGTGCTGATGGCGCAGCCGTTCTCCTATCGCTATCCGCTGGTGGACGGCCAGGGCAACTGGGGGGCGCCGGACGATCCCAAGTCCTTCGCCGCCATGCGTTATACCGAGGCGCGCCTGTCG…	ATGTCTTCACGCAAGATCGGGCTCAACCTGGTGGTCATCGTCGCCCTGGCCGCCCTCTTCACCGGCATCTGGGCCCTGTACAACCGTCCGGTCAGCGTACCGGACTGGCCGGAACGCATCTCCGGCCTCTCCTTCTCGCCGTTCCGCCTCAACCAGAACCCGCAGAGCGGCCGCTACCCCAGCGCCGAACAGATGCGCACCGACCTGGAACTGGTCGCCCGGCACACCCACAGCATCCGCACCTATTCGGTCCAGGGCGCGCTCGGCGACATCCCGGCGCTGGCCGAGGCGTTCGGCCTGCGCGTCAGCCTGGGCATCTGGCTCGGCCCGGACCTGGCCAGCAACGAGGCCGAGATCGCCCGCGCCATCCGCATCGCCAACGAGTCGCCGAGCGTGGTG…	ATGACCGCCATGCCCGAAGTACTTCGCGAAGATACGCTGAACATCCCCGACAGCCGTGGGCTGAATCTCTACACCTGCGATCCGGCCCTGGAGCGGCTGCTGGAGGTATACCTGCCGCCGGCGTTGCTCGCCGAATGGCGGCCGCTCCTCGAACGGCTCGGCGCCCGTGCCGGCGGCGAGCTGGACGTGCTGGCGCTGGCGGCGGACAAGAATCCGCCGGGGCTGGCGCCGCGCACCCGCCGCGGCGAGGATTTGCAGAGCATTCGCAAGCATCCGGACTACGTCGCCCTCGAACAGGTGGCCTATGCCGAACTTGGCCTGGCTTCCATGAGCCATCGCCCGGACGGCCCGCCGCCGCTGGTGAAGTATGCGCTCACCCACCTGTTCGTACAGGCCGAG…	ATGTCCGAATTCTTCATCAAGCGGCCGAACTTCGCCTGGGTGGTGGCCCTGTTCATCTCCCTGGCCGGCCTGCTGGTCATTTCCAAATTGCCGGTAGCGCAGTACCCCAATGTCGCGCCGCCACAGATCACCATCACCGCCACCTATCCCGGCGCCTCGGCGAAGGTGCTGGTGGACTCCGTCACCAGTGTGCTCGAGGAGTCGCTGAACGGCGCCAAGGGCCTGCTCTACTTCGAGTCGACCAACAACTCCAACGGCACCGCCGAGATCGTCGTCACCTTCGAGCCGGGCACCGATCCGGACCTGGCCCAGGTGGACGTGCAGAACCGCCTGAAGAAAGCCGAGGCGCGCATGCCGCAGGCGGTGCTGACCCAGGGCCTGCAGGTCGAGCAGACCAGC…	ATGAGCCAGCAGCAGATGCCCGTGGCCCTCGATCCGCTGGACTTCCCGTTGCACGGCAGCCGCCTGATCGAGGCCAGCGCCGGTACCGGCAAGACGTTCACCATCGCCCTGCTATACGTACGCCTGGTCCTCGACCATGGCGGCGAGAACGCTTTCGGCCGGCCGCTGAGCCCGCCGGAAATCCTCGTGGTGACCTTCACCGATGCGGCGACCCAGGAACTCCGCGAGCGTATCCGCAGCCGCCTGGGCGAAGCGGCGCGTTGTTTCGCCGAGCCGCAGGAGCGCCACGACGGCCTGCTGGTCGCGTTGCGCCAGCAGTATCCCGCCGAGCGCTGGCCGGGCTGCGCGCGCCTGCTGCGCCTGGCCGCGGAGTGGATGGACGAGGCCGCGGTATCGACC…	ATGAGGCGCGCCAGCCTGCATATGTTGCTCTGCCAGTTCGCCATGGCCCTGGGCCTGCTCCTGAGCCTGGGCAGCGAGGCCTGGGCCGCCAGGCCGGCTCCGCAGGCGGCCGTCGACCTGGAAGCGCCGCCCGCCCTGGCCGAGGACGCCAGCCTCGACCAGCTCAACGCGCAACTCGACCTGATCCGCCAGCGCGTCACCACTGACGCCAGCGACGACCTCCTCGCCGAGTTGCGCCAGAGCGCGCTGCAAGTCCAGCGCCAGGCCGACGCCCTGCTCGCGCTGCGGGTGGCCGACATCGAGCGGCTCGACGATCAGTTGAAAGTGATCGGCCCGCCGCAGCCCGACGAGGCGGAAAGCCTCGCCGCCCAGCGCCAGGCCCTGACCCGGCAGAAGAAC…	CTGCTGTTCGCCGCAGTGGTCATCGGCTTCCCCCAGCGCGCCGGCGAATGGCTGCTGGCCGCGCAGACCTGGGCCTCGCAGACCGTCGGCTGGTACTACCTGCTGGCGATGACGCTGTACCTGATCTTCGTGGTGGTCACCGCGCTTTCCGGCTACGGCAAGATCAAGCTCGGTGCCGACCACGACGAGCCGGAATTCAGCTACCTGTCCTGGGCCGGCATGCTGTTCGCCGCAGGCATCAGCATCACCCTGTTCTTCTTCTGCGTATCCGAACCGCTGACCCACTTCCTCCAGCCGCCGCAAGGCGAGGCCGGTACCCAGGAAGCCGCGCGGCAGGCCATGGAACTGCTGTTCCTGCACTGGGGCCTGCACGGCTGGGGCGTGTTCGCCCTGGTGGCG…	ATGGTCCAGGGCACCACCTCGGACGCCGGCAAGAGCACCCTGGTGACCGCGCTGTGCCGCTGGCTGGCCCGGCGCGGCGTCGCGGTGGTGCCGTTCAAGCCGCAGAACATGGCGCTGAACAGCGCGGTCACCGCCGACGGCGGCGAGATCGGCCGCGCCCAGGCGGTCCAGGCCCAGGCCTGCCGGCTGGCGCCGCACACCGACATGAACCCGGTGCTGCTCAAGCCGAACACCGACATCGGCGCCCAGGTGATCATCCATGGCCGCGCGGTGACCAGCATGGACGCCGCCGCCTACCACGACTACAAGCGCGTGGCGATGGAAGCGGTGCTGGCTTCCCATGGGCGGCTCGCCGCCGCCTACCGGGTGGTGATGGTGGAGGGCGCCGGCTCGCCGGCG…	ATGGCCAGCCTGTTCCTCGGCCGCAAGGAAATCGACGACGACCTGCTCGACGACATCGAGACGCGCCTGCTGACCGCCGACGTCGGCGTCGAGGCCACCACCCTGATCGTGCAGAACCTGACCAAGCGCGTGGCGCGCAAGGAGCTGGCCGACAGCGGCGCGCTGTACAAGGCGCTGCAGGAAGAGCTGGCCAGCCTGCTGCGCCCGGTGGAGCAGCCGTTGCAGGTCGACGTCGCGCGCGAGCCCTATGTGATCCTGGTGGTCGGGGTGAACGGCGTGGGCAAGACCACCACCATCGGCAAGCTGGCGAAGAAGCTGCAACTCGAGGGCAAGAAGGTCATGCTGGCCGCCGGCGACACCTTCCGCGCCGCCGCCGTGGAGCAGTTGCAGGTCTGGGGC…	TTGCGCATCGAGAACTTCGCACCCATCGACAGCCAGGGTTTCCGTTTCCTGCTCCGGCCAGGTGACGAACCTCTGCTCGCGCTCATCGATCGCGCCCTGCCGCATATTAGCGGGCGCTACGGCGACGAACTGTTGCGCAGCTGGAGCGCCGGGAGGCGCCTGCGCTTCGACGATCCCCGGGTGACGCTGTCGCCGGCGGAACAGCGTTGGCTCTCCGCGCACCCGGTCGTGCCGGTGGTGATCAACCATTCCCTTGGCGCGCTCGGACAAGTGGACAGCGAGGGGAAGCTGAGCGGTATCGGGCGTGATTACCTGGAACTGATCGGTAAGCGCAGTGGCCTGCGGTTTTCCTTCACTGGAGCACGCAACTTCGTCGAGACGAAAAGTCGACTGGATGCG…	CGAGCCACCGCCCGCGGACGACTATTACGAAGTCGATATGGATACCCTGGCCTACCTGGATGCCGCGCCCGAGCCTGACGTGGTCGTGGTGGAGGAGCCGCTGCCGGCGGCGAAGCCGGCCACCGGCCTGGCCGCGGAGTGGCTGGAGCTGTTCCCGCGGCTCGGCCTCGGCGGCCTGACCGCCAGCATCGGTGCCAACTGTACGCTGGTAGCTGCCGACGACGACCACTGGCATCTGCATCTCGATCCGGGCCAGAGCGCGCTGTTCAACGCCACCCAGCAGCGGCGGCTGAACGATGCGCTGAACCAGCACCTGGGGCGCACCCTCAAACTGGAGGTGACCCTGCAGAAGCCTGAGCAGGAGACCCCGGCCCAGGCAGCGGCACGCCGGCGTGCCGA…	ATGTCGCAGACGCCGTCCCTCGCCCAGCTCCAGCCCGCCGATGCCTTCCTGCGCCGCCACCTCGGCCCCGATCCGGCGGAACAGCAGGCCATGCTGGATTTCCTCGGAGTTTCCACTCGCGCCGAACTGATCGTGCAGACGGTGCCGCCGGCGATCCGCCTCAACCGGCCGCTGGAACTGCCCGCCGCGCTCGACGAACAGGCCGCCCTGGCGCGCCTGCGCGGCTACGCCGGGCTCAACCAGCGCTGGACCAGCCTGATCGGCATGGGCTACTACGGCACCGTGACGCCGCCGGTGATCCTCCGCAACGTGCTGGAGAATCCCGGCTGGTACACCGCCTATACGCCCTACCAGCCGGAAATCGCCCAGGGCCGCCTGGAAGCGCTGCTGAATTTCCAG…	GTGATTCTCGCCGACGAGCAGGAAGAGTTCGGCGGCAGCCTGCTGGACACCCGCGAGTCCCTCGACGGCAAGCCCGCCGCCGAGTGGGTCGCGGACGCCGTGGCCGAGCTGCAAGGCCTGCCGGAAGTCATCCTGCTACCGCGCTCCACGGTCAACGGCTACCACGACCACAACTTCCTCACCATCCACGAGCGGCGCACCGACCACCTCGGCGAGGTCGCCCCGCTCGGCCAGGTCCGCCAGCGCGTGCACCGCGTACGCGCCAAGCGCGTGGTACTGGCCGCCGGCGCCCATGAGCGGCCGCTGGTCTACGGCAACAACGACCTGCCCGGCAACATGCTCGCCGGCGCGGTTTCCACCTATGTACGGCGCTACGGCGTGGCACCGGGCAAGAAACTG…	GTGCGCAGCTATCTCGAATGGCTGCTGGACAACCACTTCACCTTCCTCGGCTACGAGGAATTCACCGTCGCCGACGAGGCCGACGGCGGGCGCATGGTCTACGACGAGAAATCCTTCCTCGGCCTGACCCGTCTGCTGCGTGCCGGCCTGAGCAAGGATGACCTGCACATCGAGGACTATGCCGTCGCCTACCTGCGCGAACCGGTCCTGCTGTCCTTCGCCAAGGCCGCCCATCCGAGCCGTGTGCACCGCCCGGCCTACCCGGACTACGTGTCGATCCGCGAGCTGGACGGCAAGGGCCGGGTGATCCGCGAGTGCCGCTTCATGGGCCTGTTCACCTCCTCGGTGTACAACGAGAGCGTCAACGACATTCCCTTCATCCGCGGCAAGGTCGCCGAA…	GTGTACGGCGAATATTCTCGGGAAAGCATTACCTGTCTGCTCGCCATACTGTTATCCGGCCATCACTACTTATATATAGACCTGAAACAACCGGCGGCCTGGAATGCAGAGTTGTGCCGGCAGGTCGACTGCCGCCTGATTCTCGACTGCTCGACCACGCCGACGCCCGCCAACGGTCTTCCCTGCGTCCCGGTCAGGCACCTGCCTGCCGCTCCAGCCTCGGTCGCCCGGCCATGCTTCGCGGCGGACCAGATCGCCTACATCAACTTCTCCTCGGGCACCACCGGCCGCCCGAAAGCCATCGCCTGCACCCACGCCGGCATTACCCGCCTGTGCCTGGGCCAGTCGTTCCTCGCGTTCGCTCCGCAGATGCGCTTCCTGGTGAACTCGCCGCTGTCC…	CTGCTGGAAGAAGGTGCGGACGAGGTATTCGAGGAAATCCTCGCCGCCGCTACGTCCTACTTCCAGACGTCCATCGCGCTCATTTCCATCCTCGACCATCAGCGCCAGTGGTTTCGCGCGAGCATCGGCCTCGATATCCGGCAGACGCCGCGACGGGATTCGTTCTGCGCCTATGCGATCCTGGGCAAGGGAGTCTTCGAGGTGGCCGACGCCACCCTCGACCCGCGCTTCCGGGACAACCCCTATGTGCAAGGCGAACCGCGCATCCGCTTCTACGCCGGGGCTCCGCTGGCCACCGCGGAAGGTCTCAACCTCGGCAGCCTCTGCGTCATCGACCGGGAACCACGCGGGCCGCTGGCCGAGCGGGACGTCGCCATGCTCGAGCACTTCGCTCGGCTG…	ATGTCCCTGAGTGTCTTCGATCTGTTCAAGATCGGCATCGGGCCGTCCAGCTCCCACACCGTGGGGCCGATGCGTGCCGCCGCGCGCTTCGCCGAGGGGCTGAGGCGCGAGGGGTTGCTGGAGGCCACTGCCAGCGTCAAGGTCGAGCTGTACGGCTCGCTCGGCGCCACCGGCAAGGGCCACGGCAGCGACAAGGCGGTACTGCTCGGCCTGGAGGGCGAGCAGCCGGACACGGTGGATACCGCCGCGATTCCCGCCCGGCTCGATGCCATCCGTTCCAGCGGCGAGCTGCGCCTGCTCGGCGAGCGGCCGATCCGCTTCGTCGAGAAGGAACACCTGGCGCTGATCCGCAAGCCGCTGGCCTACCATCCCAATGGCATGATCTTCCGTGCCTTCGAC…	ATGAACAGAGTTTTCCTGACCCCGGCAGCCGTGGCGCTGTGCGGCGCGTCTTCCCTGAGCCTGGCCGAACCGGTCAGCCTTGCCGACCAGGTGGTGACCGCCACCCGTACCGCCCAGACCGCTTCCCAGAGCCTGGCGGCGGTGAGCGTCATCGACCGCGAGGATATCGAGCGCAGCCAGGCGCGCAGCGTGCCGGAGCTGTTGCGCCAGGTACCCGGCGTGTCGCTGGCGAACAACGGCGGTTTCGGCAAGAACACCACGCTGTTCCTACGCGGCACCGAGTCCGACCATGTGCTGGTGCTGATCGACGGCATCAAGGTCGGCTCGGCCAGCGCTGGCCTCACCGCGTTCCAGGACTTGCCGGTGGAGCTGATCGAGCGCATCGAGGTGGTCCGCGGG…	GTGCGGGTGCTCAACTGGAGCTGGGGCATCCACCGCGTCGGCGCTCGCGACGTCGACGGCGACGAGGTGGATTCGCTGGTGCGCTCGGGGATCGCCATGAGCGGCTACGAGGAGTTGCTCGAGGAATTCTTCCTCTGGCTGCGCAAGGAGCATCCGGACGTGCTGGTGGTCAACTCCGCCGGCAACGGCTCGTCCTACTCCGGTACCGACGAATACCGCCTGCCGTCCTCCTTCGTCACCGAGCAGTTGCTGGTGGTGGGCGGCCACCAGCGCAGCGAGCGCCAAGGCCTGGCGGTGGACGACCCGGCCTACGCGGTCAAGCGCAGCACCTCGAACGTCGACATGCGGGTGGATGTCACCGCCGCCGCCTGTACCCATGCCTCGACCCTGGAGCGGGAC…	TTGCAGGCAGCTTGCGCGTTCGGCCCGCCCGGGCGGCTATTCCGCGCCTGCGACGAGCAAGGACGCGAGGCGTTGCTGCTGCTCGCGGCGGTCGATGCCGACGAAGCGTTCTGGCAGCGCGAATGGGCATTGCGGCGCTGCCGTGCGGAGAGCCTGCCGCGAGTATTGTCGTCGCCCCGGTTGCGTCGTCATGCCTTCCAGTTGTTCGCTCCGCCGCGCTGGCCGATGCGCAGCCTGCTGGATTGGGCGCCAGCGCACCTGCCGCTGGAACCGCAATGCGCGCTGGTCCTCCTGGAGCAACTTATCGATGCGGTTCGCGCCTTGCAGCGGCGCGGCGTACAGGGCTTGTGGCTGGCGCCGCGGCAGATCCTGCTGGACGAGGGCGGGCGCCTGCTGTTC…	ATGTTCAACCCGGCCAACCAGACCCACTTCAGCCTCAGCCTCGACGGCCTCCGTCACGACCTGCAGGTTCTCGAATTCAGCGGCCACGAAGGCATCAGCCGGCCCTACCGCTTCGAACTCGAACTGGTCAGCGAGCGCGCCGGCCTCGACCTCGAAGCGCTCATGCACCGACCCGCCTTCCTCGCCTTCACCCCGCAGGGCCAGGGCGTCCACGGGCTGGTCTACGGCGCCGCCCAGGCCGACGCGGGCAAGCGCCTGACCCGCTATCGCCTCACCCTCGTGCCGCAACTGGCCTACCTCGCGCAGCGCAGCAACCAGCGGATCTTCCAGCACCTCACGGTGCCGCAGATCGTCGCCCTGATCCTCGAGGAGCACGGCATCCTCGCCGACGCCTACCGC…	GTGGCTCTCCATCGCCTGGCCTTTATCTTCCTGTGCCTGCCGCTCATGGCCAGCGCCGCCCCCTTCACCTCCCCCGGCGACCGCGACCTGATCCGCGACCGCCAGCAGCGCCTGCTGGACGAACAGCGCAAGCGCCTGGAGGAACTCCAGCAACTGCCCGGCAAGGGAGCGCCCGCCGCTGCGGATGCCTCCGGCGACGACGAGCGCTGCTTCGAGATCCGCCGCATCGAGCTGGAAGGCGCCGGGCACCTCGGCGAAAGCGCGCGTCGCCAACTGCTGGCGCCCTACCAGGGGCGCTGCCTGGGCGTCGGCCAGCTCAATGCGCTGCTCAAGGCCGTCACCGACCATTACCTGGATCGCGGCTACGTCACCACCCGCGCCTACCTGCCACAGCAGGAC…	ATGGGTGACCGGCACGACTACGTCGCTCTGGAGTGGGTGAAAGGCGAGATCGCCGAAACCCTGAAACAGGCGCGCCAGGCGCTGGAAGCGTTCGTCGAGAACCCGCAGGACCCGACCCGCATGCGGTTCTGCCTGACCTACGTGCACCA---GGTGCAGGGCACCCTGCAGATGGTCGAGTTCTACGGCGCGGCCCTGCTCGCCGAGGAAATGGAGCAGTTGGTCCAGGCCTTGCTGGACGGTCGCGTGCCGAACCAGGGCGAGGCCCTGGAAGTGCTGATGCAGGCGATCCTGCAACTGCCGGTCTACCTCGACCGGATCCAGACCGCCCGGCGCGACCTGCCGATGGTGGTCCTGCCGCTGCTCAACGACCTGCGCGCCGCGCGCGGCGAGAAGCTG…
16	ATGACCTTCGACGCCGCGTTCCAGCAGCTCGGCGAGCGGATGGCCGGCGGGGCCCTGGCGGAAACGGCGCTGGCGCCGTTCACCCATCTGCTGATCGACGAGTTCCAGGATGTCTCGCCGCAGATCGTCCTCTGGCTACAGGCGTTGCACCGTCGCCTGGCAA---CCCAGGGCACCGCGCCGAGCCTGATGGCCATCGGCGACGACTGGCAGTCGATCTACGGCTGGCGCGGCAGTTCGCCGGAGCTGTTCATCGACTTCGACCGGCATTTCCCTTCGCGTGGGCGGGGACGCAAGAGCGCGCTGCTGGTGCTGGAAACCAACTACCGCTCCGTCGAACCGATCATTCGCGACGGCGAGAAGGTGCTGGCCGGGGTGCGTTTCAAGCAGGACAAGACC…	ATGCACCTGTTGCGCACCCAACCTGGCGGCTTCGTTCCCGACGACGGCATCGCCCACCTGGCCCAGACTCCCGCCGAGCTGGTGATCCTCTGCAGCGGCGATTCGCACCTGGCATTGCTGGCCGAGGCCGCCCGTGCGCTGCCGGACGACTACCCGAGCCTGCGCCTGGCCAACCCCATGCAGTTGCAGAACCACGCCTCGGTGGACCTCTACGTCGACGAAGTGCTGCGGCACGCGCGGGTGATCCTGCTTTCGCTGCACGGCGGCATCGGCTACTGGCGCTACGGCGTGGAGCAACTGGTGGCGCTGGCCGAGCGCGGCGCGCTGCTGATCCCGGTGCCCGGCGACGACCGCCCCGACCCGGAGCTGAGCGCCCTCGGCAACCTGCCGGCGGAGCAG…	ATGTTCGAACGCATCATCCAATTCGCCATCGAGCAACGCTGGCTGGTCCTGCTGGCGGTGCTGGGGATGGCCGGGGTCGGCATTGGCAGCTACCAGAAGCTGTCCATCGACGCGGTCCCGGACATCACCAACGTCCAGGTGCAGATCAATACCGCCGCCCCCGGCTACTCGCCGCTGGAAGTGGAGCAGCGGATCACCTACCCGGTGGAGACCGTCATGGCCGGCCTGCCGGGTTTGCAGGAAACCCGTTCGCTGTCGCGGCCGGGGATTTCCCAGGTGACGGTGATCTTCGAGGAAGGCACCGACATCTACTTCGCCCGCCAGCAGGTCAACGAACGCCTGAGCACGGCGCGCGAGCAACTGCCGGAAGACATCTCGCCGACCCTCGGGCCGATCTCC…	ATGTCCTTCAACCTTTCCGCCTGGGCGTTGCAGAATCGCCAGATCGTCCTGTACCTGATGATCCTGCTTGGCGCGGTTGGCGCGCTGTCCTACAGCAAGCTGGGGCAGAGCGAAGACCCGCCGTTCACCTTCAAGGCCATGGTGGTGCAGACCAACTGGCCGGGTGCCAGCGCCGAAGAGGTGGCCCGGCAGGTCACCGAGCGTATCGAGAAGAAGCTGATGGAAACCGGCGACTACGATCGCATCGTGTCCTTCTCCCGCCCCGGCGTCTCGCAGGTGACCTTCATGGCCCGCGAGGACATCCATTCCAGCGAGATCCCCGAACTCTGGTACCAGATCCGCAAGAAGATCAGCGACATTCGCGCCACCTTGCCGCAAAGCATCCAGGGCCCGTTCTTC…	ATGCGCACCGAGCAACCGAAAGTCATCCACCTCAAGGACTATCAGGCGCCGGACTACCTGATCGACGAGACCCACCTGAAGTTCGAACTGTTCGAAGACCACAGCCTGGTACACGCCGAGTTGAAGCTGCGGCGCAACCCCGAGCGCGGCGCCGGCCTGCCGCCGCTGTTGCTGCATGGCCAGCAACTGGAGCTGCTGGCGCTCGAACTGGACGGCCAGGCGCTCGGCGCGGACGACTACCAACTGGACGACGAGCAGCTCGGGGTGCAACCGCGGCAGGCCGAGTTCGTCCTCAGGAGCACGGTGCGTATCCATCCGGAGAGCAACACCGCGCTGGAAGGCCTGTACAAGTCCGGCAAGATGTTCTGCACCCAGTGCGAGGCCGAGGGTTTCCGCAAG…	ATGACCGATAACCTGAACCTCGGCGCCATCGACCTGGGCACCGACGACGAATTCATCGCCCGCCATATCGGCCCGCGTGCCGCCGACACCCAGGCCATGCTCCAGCGCCTGGGCTACGACTCGCTGGACGCGCTGATCGGCAACGTGATCCCCGACAGCATCAAGGGCAGCAGCGTGCTCGACCTGCCGGCCGGCATGGGCGAGGCCGAGGCGCTGGCCAGCCTGAAGGCGATCGCCGCGCGCAATCGCGCGTTGCGTTCCTTCATCGGCCAGGGCTACTACAACTGCCACACCCCGGCACCGATCCTGCGCAACCTCCTGGAGAACCCGGCCTGGTACACCGCCTACACGCCGTACCAGCCGGAAATCTCCCAGGGCCGCCTGGAGGCGCTGCTGAAC…	GCAGGTTTCCCATGACGAGCTGGTCGCTCGCCTGTCCATGGTCGGCCTCGAGGTCGACGCCGACCTGCCGGTCGCCGGCGCCTTCAGCGGCGTGGTGGTCGGCGAGGTGCTCTCGACCGAACAGCATCCGGACGCCGACAAGCTGCGCGTCTGCCAGGTCAGCAACGGCAGCGAGACCTTCCAGGTCGTCTGCGGCGCGCCCAACGTGCGCGCGGGCCTGAAGATTCCCTTCGCCATGATCGGCGCCGAACTGCCGGGCGACTTCAAGATCAAGAAAGCCAAGCTGCGTGGCGTCGAGTCCTTCGGCATGCTCTGCTCGGCCAAGGAATTGCAGATCAGCGAAGAGAACGCCGGTCTGCTCGAGCTGCCGGCCGACGCGCCGGTCGGCCAGGACGTCCG…	ATGAGCGAGAACAACACGTACGACTCTTCCAGCATCAAGGTGCTGAAGGGGCTGGATGCCGTACGCAAGCGCCCCGGCATGTACATCGGCGACACCGACGATGGCACCGGTCTGCACCACATGGTGTTCGAGGTGGTGGATAACTCCATCGACGAAGCGCTGGCCGGTTACTGCAGCGAAATCAGCATCACCATCCATACGGATGAGTCGATCACTGTCCGCGACAATGGACGCGGTATTCCGGTGGATATCCACAAGGAAGAAGGGGTTTCTGCGGCGGAAGTGATCATGACCGTCCTCCACGCCGGCGGCAAGTTCGACGACAACACCTACAAGGTGTCCGGCGGCTTGCACGGTGTGGGCGTCTCGGTGGTGAACGCGCTGTCCCATGAACTACGC…	ATGCTGATCCTGCGCGGCGCTCCCGCCCTTTCCGCTTTCCGCCACGGCAAACTGCTTGAGCAACTGACCCAGCACGTACCTGCCGTTACCGGGCTGTACGCTGAGTTCGCGCATTTCGCCGACGTCACCGGCGCGCTCACCGCCGACGAGGAGCAGGTGCTGGCGCGGCTGCTGAAATACGGCCCGAGCGTGCCGGTGCAGGAGCCCAGCGGACGGCTGTTCCTGGTGGTGCCGCGCTTCGGCACCATCTCGCCGTGGTCGAGCAAGGCCTCCGACATCGCCCGCAACTGCGGCCTGGCGAAGATCGACCGGCTGGAGCGCGGCATTGCCTACTATGTGCAGGGCGAACTGTCCGAGAGCGACGCCCAGCAGGTCGCCGCCCGCCTGCATGACCGCATG…	ATGAGTGGCCGCTCCGCTGGTTTCGCCCTGCCCAGCCGCGACGCGTGGCGGCGCGCGCTGGCCGAGTGGGCGCGCAGCGACGGGGCGACCTGGATCTACGTGTTCAAGGTGCTCTGCGCGGCCTTCCTGACCCTCTGGCTGGCGATGCGCCTGGAGTTGCCGCAACCGAGCACGGCGACCATCACCGTGTTCATCGTCATGCAGCCGCAGAGCGGCCAGGTGTTCGCCAAGAGCTTCTACCGCATCCTCGGCACCCTGGTCGGCCTCAGCGTGATGGTCACCCTGATCGCCCTGTTCGCCCAGGAGCGGGTGCTGTTCCTGCTCAGCTCGGCGATCTGGATCGGTCTCTGCACCGCCGGGGCCGCCCGCTACCGTGACTTCCGCTCCTACGCCTGCGTG…	ATGAGCGAATCCCTCGATCTGAGCCTGGAAGGGGTCGAACGCCGGTCGTTGGCCGAGTTCACCGAGCAGGCCTATCTGAATTATTCCATGTACGTGATCATGGACCGCGCCCTGCCGCATATCGGCGACGGCCTGAAGCCGGTGCAGCGACGCATCGTCTACGCCATGAGCGAACTGGGGCTGGATGCCGATTCCAAGCACAAGAAGTCGGCGCGCACCGTCGGCGACGTGCTCGGCAAGTTCCACCCGCACGGCGACTCGGCCTGCTACGAGGCCATGGTGCTGATGGCGCAGCCGTTCTCCTATCGCTATCCGCTGGTGGACGGCCAGGGCAACTGGGGGGCTCCGGACGATCCCAAGTCCTTCGCCGCCATGCGTTATACCGAGGCGCGCCTGTCG…	ATGTCTTCACGCAAGATCGGGCTCAACCTGGTGGTCATCGTCGCCCTGGCCGCCCTCTTCACCGGCATCTGGGCCCTGTACAACCGTCCGGTCAGCGTACCGGACTGGCCGGAACGCATCTCCGGCTTCTCCTTCTCGCCGTTCCGCCTCAACCAGAATCCGCAGAGCGGCCGCTACCCCAGCGCCGAACAGATGCGCGCCGACCTGGAACTGGTCGCCCGGCACACCCACAGCATCCGCACCTATTCGGTCCAGGGCGCGCTCGGCGACATCCCGGCGCTGGCCGAGGCGTTCGGCCTGCGCGTCAGCCTGGGCATCTGGCTCGGCCCGGACCTGGCCGGCAACGAGGCCGAGATCGCCCGCGCCATCCGCATCGCCAACGAGTCGCCGAGCGTGGTG…	ATGACCGCCATGCCCGAAGTACTTCGCGAAGATACGCTGAACATCCCCGACAGCCGTGGGCTGAATCTCTACACCTGCGATCCGGCCCTGGAGCGGCTACTGGAGGTATACCTGCCGCCGGCGTTGCTCGCCGAATGGCGGCCGCTCCTCGAACGGCTCGGCGCCCGTGCCGGCGGCGAGCTGGACGTGCTGGCGCTGGCGGCGGACAAGAACCCGCCGGTGCTGGCGCCGCGCACCCGCCGCGGCGAGGATTTGCAGAGCATTCGCAAGCATCCGGACTACGTCGCCCTCGAACGGGTGGCCTATGCCGAACTCGGCCTGGCTTCCATGAGCCATCGCCCGGACGGCCCGCCGCCGCTGGTGAAGTATGCGCTCACCCACCTGTTCGTACAGGCCGAG…	ATGTCCGAATTCTTCATCAAGCGGCCGAACTTCGCCTGGGTGGTGGCCCTGTTCATCTCCCTGGCCGGCCTGCTGGTCATTTCCAAATTGCCGGTAGCGCAGTACCCCAATGTCGCGCCGCCACAGATCACCATCACCGCCACCTATCCCGGCGCCTCGGCGAAGGTGCTGGTGGACTCCGTCACCAGTGTGCTCGAGGAGTCGCTGAACGGCGCCAAGGGCCTGCTCTACTTCGAGTCGACCAACAACTCCAACGGCACCGCCGAGATCGTCGTCACCTTCGAGCCGGGCACCGATCCGGACCTGGCCCAGGTGGACGTGCAGAACCGCCTGAAGAAAGCCGAGGCGCGCATGCCGCAGGCGGTGCTGACCCAGGGCCTGCAGGTCGAGCAGACCAGC…	ATGAGCCAGCAGCAGATGCCCGTGGCCCTCGATCCGCTGGACTTCCCGTTGCACGGCAGCCGCCTGATCGAGGCCAGCGCCGGTACCGGCAAGACGTTCACCATCGCCCTGCTATACGTACGTCTGGTCCTCGACCATGGCGGCGAGAACGCTTTCGGCCGGCCGCTGAGCCCGCCGGAAATCCTCGTGGTGACCTTCACCGATGCGGCGACCCAGGAACTCCGCGAGCGTATCCGCAGCCGCCTGGGCGAAGCGGCGCGTTGTTTCGCCGAGCCGCAGGAGCGCCACGACGGCCTGCTGGTCGCGTTGCGCCAGCAGTATCCCACCGAGCGCTGGCCGGGCTGCGCGCGCCTGCTGCGCCTGGCCGCGGAGTGGATGGACGAGGCCGCGGTATCGACC…	ATGAGGCGCGCCAGCCTGCATATGTTGCTCTGCCAGTTCGCCATGGCCCTGGGCCTGCTCCTGAGCCTGGGCAGCGAGGCCTGGGCCGCCAGGCCGGCTCCGCAGGCGGCCGTCGACCTGGAAGCGCCGGCCGCCCTGGCCGAGGACGCCAGCCTCGACCAGCTCAACGCGCAACTCGACCTGATCCGCCAGCGCGTCACCGCCGACGCCAGCGACGACCTCCTCGCCGAGTTGCGCCAGAGCGCGCTGCAAGTCCAGCGTCAGGCCGACGCCCTGCTCGCGCTACGGGTGGCCGACATCGAGCGGCTCGACGATCAGTTGAAAGTGATCGGCCCGCCGCAGCCCGACGAGGCGGAAAGCCTCGCCGCCCAGCGCCAGGCCCTGACCCGGCAGAAGAAC…	CTGCTGTTCGCCGCGGTGGTCATCGGCTTCCCCCAGCGCGCCGGCGAATGGCTACTGGCCGCACAGACCTGGGCCTCGCAGACCGTCGGTTGGTACTACCTGCTGGCGATGACGCTGTACCTGATCTTCGTGGTGGTCACCGCGCTTTCCGGCTACGGCAAGATCAAGCTCGGTGCCGACCACGACGAGCCGGAATTCAGCTACCTGTCCTGGGCCGGCATGCTGTTCGCCGCCGGCATCAGCATCACCCTGTTCTTCTTCTGCGTATCCGAGCCGTTGACCCACTTCCTCCAGCCGCCGCAAGGCGAGGCCGGTACCCAGGAAGCCGCGCGGCAGGCCATGGAACTGCTGTTCCTGCACTGGGGCCTGCACGGCTGGGGCGTGTTCGCCCTGGTGGCG…	ATGGTCCAGGGCACCACCTCGGACGCCGGCAAGAGCACCCTGGTGACCGCGCTGTGCCGCTGGCTGGCCCGGCGCGGCGTCGCGGTGGTGCCGTTCAAGCCGCAGAACATGGCGCTGAACAGCGCGGTCACCGCCGACGGCGGCGAGATCGGCCGCGCCCAGGCGGTCCAGGCCCAGGCCTGCCGGCTGGCGCCGCACACCGACATGAACCCGGTGCTGCTCAAGCCGAACACCGACATCGGCGCCCAGGTGATCATCCATGGCCGCGCGGTGACCAGCATGGACGCCGCCGCCTACCACGACTACAAGCGCGTGGCGATGGAAGCGGTGCTGGCTTCCCATGGGCGGCTCGCCGCCGCCTACCGGGTGGTGATGGTGGAGGGCGCCGGCTCGCCGGCG…	ATGGCCAGCCTGTTCCTCGGCCGCAAGGAAATCGACGACGACCTGCTCGACGACATCGAGACGCGCCTGCTGACCGCCGACGTCGGCGTCGAGGCCACCACCCTGATCGTGCAGAACCTGACCAAGCGCGTGGCGCGCAAGGAGCTGGCCGACAGCGGCGCGCTGTACAAGGCGCTGCAGGAAGAGCTGGCCAGCCTGCTGCGCCCGGTGGAGCAGCCGTTGCAGGTCGACGTCGCGCGCGAGCCCTATGTGATCCTGGTGGTTGGGGTGAACGGCGTGGGCAAGACCACCACCATCGGCAAGCTGGCGAAGAAGCTGCAACTCGAGGGCAAGAAGGTCATGCTGGCCGCCGGCGACACCTTCCGCGCCGCCGCCGTGGAGCAGTTGCAGGTCTGGGGC…	TTGCGCATCGAGAACTTCGCACCCATCGACAGCCAGGGTTTCCGTTTCCTGCTCCGGCCAGGTGACGAACCTCTGCTCGCGCTCATCGATCGCGCCCTGCCGCATATTAGCGGGCGCTACGGCGACGAACTGTTGCGCAGCTGGAGCGCCGGGAGGCGCCTGCGCTTCGACGATCCCCGGGTGACGCTGTCGCCGGCGGAACAGCGTTGGCTCTCCGCGCACCCGGTCGTGCCGGTGGTGATCAACCATTCCCTTGGCGCGCTCGGACAAGTGGACAGCGAGGGGAAGCTGAGCGGTATCGGGCGTGATTACCTGGAACTGATCGGTAAGCGCAGTGGCCTGCGGTTTTCCTTCACTGGAGCACGCAACTTCGTCGAGACGAAAAGTCGACTGGATGCG…	CGAGCCACCGCCCGCGGACGACTACTACGAAGTCGACATGGATACCCTGGCCTACCTGGATGCCGCGCCCGAGCCTGACGTGGTCGTGGTGGAGGAGCCGCTGCCGGCGGCGAAGCCGGCCACCGGCCTGGCCGCGGAGTGGCTGGAGCTGTTCCCGCGGCTCGGCCTCGGCGGCCTGACCGCCAGCATCGGTGCCAACTGTACGCTGGTAGCTGCCGACGGCGACCACTGGCATCTGCATCTCGATCCGGGCCAGAGCGCGCTGTTCAACGCCACCCAGCAGCGGCGGCTGAACGATGCGCTGAACCAGCACCTGGGGCGCACCCTCAAACTGGAGGTGACCCTGCAGAAGCCTGAGCAGGAGACCCCGGCCCAGGCAGCGGCACGCCGGCGTGCCGA…	ATGTCGCAGACGCCGTCCCTCGACCAGCTCCAGCCCGCCGATGCCTTCCTGCGCCGCCACCTCGGCCCCGATCCGGCGGAACAGCAGGCCATGCTGGACTTCCTCGGAGTTTCCACTCGCGCCGAACTGATCGTGCAGACGGTGCCGCCGGCGATCCGCCTCAACCGGCCGCTGGAACTGCCCGCCGCGCTCGACGAACAGGCCGCCCTGGCGCGCCTGCGCGGCTACGCCGGGCTCAACCAGCGCTGGACCAGCCTGATCGGCATGGGCTACTACGGCACCGTGACGCCGCCGGTGATCCTCCGCAACGTGCTGGAGAATCCCGGCTGGTACACCGCCTATACGCCCTACCAGCCGGAAATCGCCCAGGGCCGCCTGGAAGCGCTGCTGAATTTCCAG…	GTGATTCTCGCCGACGAGCAGGAAGAGTTCGGCGGCAGCCTGCTGGACACCCGCGAGACCCTCGACGGCAAGCCCGCCGCCGAGTGGGTCGCGGAGGCCGTGGCCGAGCTGCAAGGCCTGCCGGAAGTCATCCTGCTACCGCGCTCCACGGTCAACGGCTACCACGACCACAACTTCCTCACCATCCACGAGCGGCGCACCGACCACCTCGGCGAGGTCGCCCCGCTCGGCCAGGTCCGCCAGCGCGTGCACCGCGTACGCGCCAAGCGCGTGGTACTGGCCGCCGGCGCCCATGAGCGGCCGCTGGTCTACGGCAACAACGACCTGCCCGGCAACATGCTCGCCGGCGCGGTTTCCACCTATGTACGGCGCTACGGCGTGGCACCGGGCAAGAAACTG…	GTGCGCAGCTATCTCGAATGGCTGCTGGACAACCACTTCACCTTCCTCGGCTACGAGGAATTCAGCGTCGCCGACGAGGCCGACGGCGGGCGCATGGTCTACGACGAGAAATCCTTCCTCGGCCTGACCCGTCTGCTGCGCGCCGGCCTGAGCAAGGATGACCTGCACATCGAGGACTATGCCGTCGCCTACCTGCGCGAACCGGTCCTGCTGTCCTTCGCCAAGGCCGCCCATCCGAGCCGCGTGCACCGCCCGGCCTACCCGGACTACGTGTCGATCCGCGAGCTGGACGGCAAGGGCCGGGTGATCCGCGAGTGCCGCTTCATGGGCCTGTTCACCTCCTCGGTGTACAACGAGAGCGTCAACGACATTCCCTTCATCCGCGGCAAGGTCGCCGAA…	GTGTACGGCGAATATTCTCGGGAAAGCATTGTCTGCCTGCTCGCCATACTATTATCCGGCCATCACTACTTATATATAGACCTGAAACAACCGGCGGCCTGGAATGCAGAGTTGTGCCGGCAGGTCGACTGCCGCCTGATCCTCGACTGCTCGACCACGCCGACGCCCGCCAACGGTCTTCCCTGCGTCCCGGTCAGGCACCTGCCTGCCGCTCCAGCCTCGGTCGCCCGGCCATGCTTCGCGGCGGACCAGATCGCCTACATCAACTTCTCCTCGGGCACCACCGGCCGCCCGAAAGCCATCGCCTGCACCCACGCCGGCATTACCCGTCTGTGCCTGGGCCAGTCGTTCCTCGCCTTCGCTCCGCAGATGCGCTTCCTGGTGAACTCGCCGCTGTCC…	CTGCTGGAAGAAGGTGCGGACGAGGTATTCGAGGAAATCCTCGCCGCCGCTACGTCCTACTTCCAGACGCCCATCGCGCTCATTTCCATCCTCGACCATCAGCGCCAGTGGTTTCGCGCGAGCATCGGCCTCGATATCCGGCAGACGCCGCGACGGGATTCGTTCTGCGCCTATGCGATCCTGGGCAAGGGAGTCTTCGAGGTGGCCGACGCCACCCTCGACCCGCGCTTCCGGGACAACCCCTATGTGCAAGGCGAACCGCGCATCCGCTTCTACGCCGGGGCTCCGCTGGCCACCGCGGAAGGTCTCAACCTCGGCAGCCTCTGCGTCATCGACCGGGAACCACGCGGGCCGCTGGCCGAGCGGGACGTCGCCATGCTCGAGCACTTCGCTCGGCTG…	ATGTCCCTGAGTGTCTTCGATCTGTTCAAGATCGGCATCGGGCCGTCCAGCTCCCACACCGTGGGGCCGATGCGTGCCGCCGCGCGCTTTGCCGAGGGGCTGAGGCGCGAGGGGTTGCTGGAGGCCACTGCCAGCGTCAAGGTCGAGCTGTACGGCTCGCTCGGCGCCACCGGCAAGGGCCACGGCAGCGACAAGGCGGTACTGCTCGGCCTGGAGGGCGAGCAGCCGGACACGGTGGATACCGCCGCGATTCCCGCTCGGCTCGATGCCATCCGTTCCAGCGGCGAGCTGCGCCTGCTCGGCGAGCGGCCGATCCGCTTCGTCGAGAAGGAACACCTTGCGCTGATCCGCAAGCCGCTGGCCTACCATCCCAATGGCATGATCTTCCGTGCCTTCGAC…	ATGAACAGAGTTTTCCTGACCCCGGCAGCCGTGGCGCTGTGCGGCGCGTCTTCCCTGAGCCTGGCCGAACCGGTCAGCCTTGCCGACCAGGTGGTGACCGCCACCCGTACCGCCCAGACCGCTTCCCAGAGCCTGGCGGCGGTGAGCGTCATCGACCGCGAGGATATCGAGCGCAGCCAGGCGCGCAGCGTGCCGGAGCTGTTGCGCCAGGTACCCGGCGTGTCGCTGGCGAACAACGGCGGTTTCGGCAAGAACACCACGCTGTTCCTGCGCGGCACCGAGTCCGACCATGTGCTGGTGCTGATCGACGGCATCAAGGTCGGCTCGGCCAGCGCTGGCCTCACCGCGTTCCAGGACTTGCCGGTGGAGCTGATCGAGCGCATCGAGGTGGTCCGCGGG…	GTGCGGGTGCTCAACTGGAGCTGGGGCATCCACCGCGTCGGCGCTCGCGACGTCGATGGCGACGAGGTGGATTCGCTGGTGCGCTCGGGGATTGCCATGAGCGGCTACGAGGAGTTGCTCGAGGAGTTCTTCCTCTGGCTGCGCAAGGAGCATCCGGACGTGCTGGTGGTCAACTCCGCCGGCAACGGCTCGTCCTACTCCGGTACCGACGAATACCGCCTGCCGTCCTCCTTCGTTACCGAGCAGTTGCTGGTGGTGGGCGGCCACCAGCGCAGCGAGCGCCAAGGCCTGGCGGTGGACGACCCGGCCTACGCGGTCAAGCGCAGCACCTCGAACGTCGACATGCGGGTGGATGTCACCGCCGCCGCCTGTACCCATGCCTCGACCCTGGAGCGGGAC…	TTGCAGGCAGCTTGCGCGTTCGGCCCACCCGGGCGGCTATTTCGCGCCTGCGACGAGCAAGGACGCGAGGCGTTGCTGCTGCTCGCGGCGGTCGATGCCGACGAAGCGTTCTGGCAGCGCGAATGGGCATTGCGGCGCTGCCGTGCGGAGAGCCTGCCGCGAGTATTGTCGTCGCCCCGGTTGCGTCGTCATGCCTTCCAGTTGTTCGCTCCGCCGCGCTGGCCGATGCGCAGCCTGCTGGATTGGGCGCCAGCGCACCTGCCGCTGGAACCGCAATGCGCGCTGGTCCTCCTGGAGCAACTTATCGATGCGGTTCGCGCCTTGCAGCGGCGCGGCGTACAGGGCTTGTGGCTGGCGCCGCGGCAGATCCTGCTGGACGAGGGCGGGCGCCTGCTGTTC…	ATGTTCAACCCGGCCAACCAGACCCACTTCAGCCTCACCCTCGACGGCCTCCGCCACGACCTGCAGGTCCTCGCCTTCAACGGCCACGAAGGCATCAGTCGCCCCTACCGTTTCGAACTCGAACTGGTCGGAGAGCGCGCCGGCCTCGACCTCGAAACGTTCCTCCACCGGCCCGCCTTCCTCGCCTTCACCCCGCAGGGCCAGGGTGTCCACGGCCTGGTCTACGGCGCTGCCCAGGGCGATGCCGGCAAGCGCCTGACCTGCTATCGCCTCACCCTCGTCCCGCACCTGGCCTACCTCGCCCAGCGCAACAACCAGCGGATCTTCCAGCACCTCACGGTGCCGCAGATCGTCGCCCTGGTCCTCGAGGAGCACGGCATCCTCGCCGACGCCTACCGC…	GTGGCTCTCCATCGCCTGGCCTTTATCTTCCTGTGCCTGCCGCTCATGGCCAGCGCCGCCCCCTTCACCTCCCCCGGCGACCGCGACCTGATCCGCGACCGCCAGCAGCGCCTGCTGGACGAACAGCGCAAGCGCCTGGAGGAACTCCAGCAACTGCCCGGCAAGGGAGCGCCCGCCGCTGCGGATGCCTCCGGCGACGACGAGCGCTGCTTCGAGATCCGCCGCATCGAGCTGGAAGGCGCCGGGCACCTCGGCGAAAGCGCGCGTCGCCAACTGCTGGCGCCCTACCAGGGGCGCTGCCTGGGCGTCGGCCAGCTCAATGCGTTGCTCAAGGCCGTCACCGACCATTACCTGGATCGCGGCTACGTCACCACCCGCGCCTACCTGCCACAGCAGGAC…	ATGGGTGACCGGCACGACTACGTCGCTCTGGAATGGGTGAAAGGCGAGATCGCCGAAACCCTGAAACAGGCGCGCCAGGCGCTGGAAGCGTTCGTCGAGAACCCGCAGGACCCGACCCGCATGCGGTTCTGCCTGACCTACGTGCACCA---GGTGCAGGGCACCCTGCAGATGGTCGAGTTCTACGGCGCGGCCCTGCTCGCCGAGGAAATGGAGCAGTTGGTCCAGGCCTTGCTGGACGGTCGCGTGCCGAACCAGGGCGAGGCCCTGGAAGTGCTGATGCAGGCGATCCTGCAACTGCCGGTCTACCTCGACCGGATCCAGACCGCCCGGCGCGACCTGCCGATGGTGGTCCTGCCGCTGCTCAACGACCTGCGCGCCGCGCGCGGCGAGAAGCTG…
17	ATGACCTTCGACGCCGCGTTCCAGCAGCTCGGCGAGCGGATGGCCGGCGGGGCTCTGGCGGAAACGGCATTGGCGCCGTTCACCCATCTGCTGATCGACGAGTTCCAGGATGTCTCGCCGCAGATCGTCCTCTGGCTACAGGCGTTGCACCGTCGCCTGGCGA---CCCAGGGCACCGCGCCGAGCCTGATGGCCATCGGCGACGACTGGCAGTCGATCTACGGCTGGCGCGGCAGTTCGCCGGAGCTGTTCATCGACTTCGACCGGCATTTCCCTTCGCGTGGGCGGGGACGCAAGAGCGCGCTGCTGGTGCTGGAAACCAACTACCGCTCCGTCGAACCGATCATTCGCGACGGCGAGAAGGTGCTGGCCGGGGTGCGTTTCAAGCAGGACAAGACC…	ATGCACCTGTTGCGCACCCAACCCGGCGGCTTCGTTCCCGACGACGGCATCGCCCACCTGGCCCAGACTCCCGCCGAGCTGGTGATCCTCTGCAGCGGCGATTCGCACCTCGCATTGCTGGCCGAGGCCGCCCGTGCGCTGCCGGACGACTACCCGAGCCTGCGCCTGGCCAACCCCATGCAGTTGCAGAACCACGCCTCGGTGGACCTCTACGTCGAGGAAGTGCTGCGGCACGCGCGGGTGATCCTGCTTTCGCTGCACGGCGGCATCGGCTACTGGCGCTACGGCGTGGAGCAACTGGTGGCGCTGGCCGAGCGCGGCGCGCTGCTGATCCCGGTGCCCGGCGACGACCGCCCCGACCCGGAGCTGAGCGCCCTCGGCAACCTGCCGGCGGAGCAG…	ATGTTCGAACGCATCATCCAATTCGCCATCGAGCAACGCTGGCTGGTCCTGCTGGCGGTGCTGGGGATGGCCGGGGTCGGCATCGGCAGCTACCAGAAGCTGTCCATCGACGCGGTCCCGGACATCACCAACGTCCAGGTGCAGATCAATACCGCCGCCCCCGGCTACTCGCCGCTGGAAGTGGAGCAGCGGATCACCTACCCGGTGGAGACCGTCATGGCCGGCCTGCCGGGTTTGCAGGAAACCCGTTCGCTGTCGCGGCCGGGGATTTCCCAGGTGACGGTGATCTTCGAGGAGGGCACCGATATCTACTTCGCCCGCCAGCAGGTCAACGAACGCCTGAGCACGGCGCGCGAGCAACTGCCGGAAGACATCTCGCCGACCCTCGGGCCGATCTCC…	ATGTCCTTCAACCTTTCCGCCTGGGCGTTGCAGAATCGCCAGATCGTCCTGTACCTGATGATCCTGCTTGGCGCGGTTGGCGCGCTGTCCTACAGCAAGCTGGGGCAGAGCGAAGACCCGCCGTTCACCTTCAAGGCCATGGTGGTGCAGACCAACTGGCCGGGTGCCAGCGCCGAAGAGGTGGCCCGGCAGGTCACCGAGCGTATCGAGAAGAAGCTGATGGAAACCGGCGACTACGATCGCATCGTGTCCTTCTCCCGCCCCGGCGTCTCGCAGGTGACCTTCATGGCCCGCGAGGACATCCATTCCAGCGAGATCCCCGAACTCTGGTACCAGATCCGCAAGAAGATCAGCGACATTCGCGCCACCTTGCCGCAAAGCATCCAGGGCCCGTTCTTC…	ATGCGCACCGAGCAACCGAAAGTCATCCACCTCAAGGACTATCAGGCGCCGGACTACCTGATCGACGAGACCCACCTGAAGTTCGAACTGTTCGAAGACCACAGCCTGGTACACGCCGAGTTGAAGCTGCGGCGCAACCCCGAGCGCGGCGCCGGCCTGCCGCCGCTGTTGCTGCATGGCCAGCAACTGGAGCTGCTGGCGCTCGAACTGGACGGCCAGGCGCTCGGCGCGGACGACTACCAACTGGACGACGAGCAGCTCGGGGTGCAACCGCGGCAGGCCGAATTCGTCCTCAGGAGCACGGTGCGTATCCATCCGGAGAGCAACACCGCGCTGGAAGGCCTGTACAAGTCCGGCAAGATGTTCTGCACCCAGTGCGAGGCCGAGGGTTTCCGCAAG…	ATGACCGATAACCTGAACCTCGGCGCCATCGACCTGGGCACCGACGACGAATTCATCGCCCGCCATATCGGCCCGCGTGCCGCCGACACCCAGGCCATGCTCCAGCGCCTGGGCTACGACTCGCTGGACGCGCTGATCGGCAACGTGATCCCCGACAGCATCAAGGGCAGCAGCGTGCTCGACCTGCCGGCCGGCATGGGCGAGGCCGAGGCGCTGGCCAGCCTGAAGGCGATCGCCGCGCGCAATCGCGCGTTGCGTTCCTTCATCGGCCAGGGCTACTACAACTGCCACACCCCGGCACCGATCCTGCGCAACCTCCTGGAGAACCCGGCCTGGTACACCGCCTACACGCCGTACCAGCCGGAAATCTCCCAGGGCCGCCTGGAGGCGCTGCTGAAC…	GCAGGTTTCCCATGACGAGCTGGTCGCTCGCCTGTCCATGGTCGGCCTCGAGGTCGACGCCGACCTGCCGGTCGCCGGCGCCTTCAGCGGCGTGGTGGTCGGCGAGGTGCTCTCGACCGAACAGCATCCGGACGCCGACAAGCTGCGCGTCTGCCAGGTCAGCAACGGCAGCGAGACCTTCCAGGTCGTCTGCGGCGCGCCCAACGTGCGCGCGGGCCTGAAGATTCCCTTCGCCATGATCGGCGCCGAACTGCCGGGCGACTTCAAGATCAAGAAAGCCAAGCTGCGTGGCGTCGAGTCCTTCGGCATGCTCTGCTCGGCCAAGGAATTGCAGATCAGCGAAGAGAACGCCGGTCTGCTCGAGCTGCCGGCCGACGCGCCGGTCGGCCAGGACGTCCG…	ATGAGCGAGAACAACACGTACGACTCTTCCAGCATCAAGGTGCTGAAGGGGCTGGATGCCGTACGCAAGCGCCCCGGCATGTACATCGGCGACACCGACGATGGCACCGGTCTGCACCACATGGTGTTCGAGGTGGTGGATAACTCCATCGACGAAGCGCTGGCCGGTTACTGCAGCGAAATCAGCATCACCATCCATACGGATGAGTCGATCACTGTCCGCGACAATGGACGCGGTATTCCGGTGGATATCCACAAGGAAGAAGGGGTTTCTGCGGCGGAAGTGATCATGACCGTCCTCCACGCCGGCGGCAAGTTCGACGACAACACCTACAAGGTGTCCGGCGGCTTGCACGGTGTGGGCGTCTCGGTGGTGAACGCGCTGTCCCATGAACTACGC…	ATGCTGATCCTGCGCGGCGCTCCCGCCCTTTCCGCTTTCCGCCACGGCAAACTGCTCGAGCAACTGACCCAGCACGTACCTGCCGTTACCGGGCTGTACGCTGAGTTCGCGCATTTCGCCGACGTCACCGGCGCGCTCACTGCCGACGAGGAGCAGGTGCTGGCGCGGCTGCTGAAATACGGCCCGAGCGTGCCGGTGCAGGAGCCCAGCGGCCGGCTGTTCCTGGTGGTGCCGCGCTTCGGCACCATCTCGCCGTGGTCGAGCAAGGCCTCCGACATCGCCCGCAACTGCGGCCTGGCGAAGATCGACCGGCTGGAGCGCGGCATTGCCTACTATGTGCAGGGCGAACTTTCCGAGAGCGATGCCCAACAGGTCGCCGCCCGCCTGCATGACCGCATG…	ATGAGTGGCCGCTCCGCTGGTTTCGCCCTGCCCAGCCGCGACGAGTGGCGGCGCGCGCTGGCCGAGTGGGCGCGCAGCGACGGGGCGACCTGGATCTACGTGTTCAAGGTGCTCTGCGCGGCCTTCCTGACCCTCTGGCTGGCGATGCGCCTGGAGTTGCCGCAACCGAGCACGGCGACCATCACCGTGTTCATCGTCATGCAGCCGCAGAGCGGCCAGGTGTTCGCCAAGAGCTTCTACCGCATCCTCGGCACCCTGGTCGGCCTCAGCGTGATGGTCACCCTGATCGCCCTGTTCGCCCAGGAGCGGGTGCTGTTCCTGCTCAGCTCGGCGATCTGGATCGGTCTCTGCACCGCCGGGGCCGCCCGCTACCGTGACTTCCGCTCCTACGCCTGCGTG…	ATGAGCGAATCCCTCGATCTGAGCCTGGAAGGGGTCGAACGCCGGTCGTTGGCCGAGTTCACCGAGCAGGCCTATCTGAACTATTCCATGTACGTGATCATGGACCGCGCCCTGCCGCATATCGGCGACGGCCTGAAACCGGTGCAGCGACGCATCGTCTACGCCATGAGCGAACTGGGGCTGGATGCCGATTCCAAGCACAAGAAGTCGGCGCGCACCGTCGGCGACGTGCTCGGCAAGTTCCACCCGCACGGCGACTCGGCCTGCTACGAGGCCATGGTGCTGATGGCGCAGCCGTTCTCCTATCGCTATCCGCTGGTGGACGGCCAGGGCAACTGGGGGGCTCCGGACGATCCCAAGTCCTTCGCCGCCATGCGTTATACCGAGGCGCGCCTGTCG…	ATGTCTTCACGCAAGATCGGGCTCAACCTGGTGGTCATCGTCGCCCTGGCCGCCCTCTTCACCGGCATCTGGGCCCTGTACAACCGTCCGGTCAGCGTACCGGACTGGCCGGAACGCATCTCCGGCTTCTCCTTCTCGCCGTTCCGCCTCAACCAGAACCCGCAGAGCGGCCGCTACCCCAGCGCCGAACAGATGCGCGCCGACCTGGAACTGGTCGCCCGGCACACCCACAGCATCCGCACCTATTCGGTCCAGGGCGCGCTCGGCGACATCCCGGCGCTGGCCGAGGCGTTCGGCCTGCGCGTCAGCCTGGGCATCTGGCTCGGCCCGGACCTGGCCGGCAACGAGGCCGAGATCGCCCGCGCCATCCGCATCGCCAACGAGTCGCCGAGCGTGGTG…	ATGACCGCCATGCCCGAAGTACTTCGCGAAGATACGCTGAACATCCCCGACAGCCGTGGGCTGAATCTCTACACCTGCGATCCGGCCCTGGAGCGGCTGCTGGAGGTATACCTGCCGCCGGCGTTGCTCGCCGAATGGCGGCCGCTCCTCGAACGGCTCGGCGCCCGTGCCGGCGGCGAGCTGGACGTGCTGGCGCTGGCGGCGGACAAGAACCCGCCGGTGCTGGCGCCGCGCACCCGCCGCGGCGAGGATTTGCAGAGCATTCGCAAGCATCCGGACTACGTCGCCCTCGAACAGGTGGCCTATGCCGAACTTGGCCTGGCTTCCATGAGCCATCGCCCGGACGGCCCGCCGCCGCTGGTGAAGTATGCGCTCACCCACCTGTTCGTACAGGCCGAG…	ATGTCCGAATTCTTCATCAAGCGGCCGAACTTCGCCTGGGTGGTGGCCCTGTTCATCTCCCTGGCCGGCCTGCTGGTCATTTCCAAATTGCCGGTAGCGCAGTACCCCAATGTCGCGCCGCCACAGATCACCATCACCGCCACCTATCCCGGCGCCTCGGCGAAGGTGCTGGTGGACTCCGTCACCAGTGTGCTCGAGGAGTCGCTGAACGGCGCCAAGGGCCTGCTCTACTTCGAGTCGACCAACAACTCCAACGGCACCGCCGAGATCGTCGTCACCTTCGAGCCGGGCACCGATCCGGACCTGGCCCAGGTGGACGTGCAGAACCGCCTGAAGAAAGCCGAGGCGCGCATGCCGCAGGCGGTGCTGACCCAGGGCCTGCAGGTCGAGCAGACCAGC…	ATGAGCCAGCAGCAGATGCCCGTGGCCCTCGATCCGCTGGACTTCCCGTTGCACGGCAGCCGCCTGATCGAGGCCAGCGCCGGTACCGGCAAGACGTTCACCATCGCCCTGCTATACGTACGCCTGGTCCTCGACCATGGCGGCGAGAACGCTTTCGGCCGGCCGCTGAGCCCGCCGGAAATCCTCGTGGTGACCTTCACCGATGCGGCGACCCAGGAACTCCGCGAGCGTATCCGCAGCCGCCTGGGCGAAGCGGCGCGTTGTTTCGCCGAGCCGCAGGAGCGCCACGACGGCCTGCTGGTCGCGTTGCGCCAGCAGTATCCCGCCGAGCGCTGGCCGGGCTGCGCGCGCCTGCTGCGCCTGGCCGCGGAGTGGATGGACGAGGCCGCGGTATCGACC…	ATGAGGCGCGCCAGCCTGCATATGTTGCTCTGCCAGTTCGCCATGGCCCTGGGCCTGCTCCTGAGCCTGGGCAGCGAGGCCTGGGCCGCCAGGCCGGCTCCGCAGGCGGCCGTCGACCTGGAAGCGCCGGCCGCCCTGGCCGAGGACGCCAGCCTCGACCAGCTCAACGCGCAACTCGACCTGATCCGCCAGCGCGTCACCGCCGACGCCAGCGACGACCTCCTCGCCGAGTTGCGCCAGAGCGCGCTGCAAGTCCAGCGCCAGGCCGACGCCCTGCTCGCGCTGCGGGTGGCCGACATCGAGCGGCTCGACGATCAGTTGAAAGTGATCGGCCCGCCGCAGCCCGACGAGGCGGAAAGCCTCGCCGCCCAGCGCCAGGCCCTGACTCGGCAGAAGAAC…	CTGCTGTTCGCCGCAGTGGTCATCGGCTTCCCCCAGCGCGCCGGCGAATGGCTGCTGGCCGCGCAGACCTGGGCCTCGCAGACCGTCGGCTGGTACTACCTGCTGGCGATGACGCTGTACCTGATCTTCGTGGTGGTCACCGCGCTTTCCGGCTACGGCAAGATCAAGCTCGGTGCCGACCACGACGAGCCGGAATTCAGCTACCTGTCCTGGGCCGGCATGCTGTTCGCCGCCGGCATCAGCATCACCCTGTTCTTCTTCTGCGTATCCGAACCGCTGACCCACTTCCTCCAGCCGCCGCAAGGCGAGGCCGGTACCCAGGAAGCCGCGCGGCAGGCCATGGAACTGCTGTTCCTGCACTGGGGCCTGCACGGCTGGGGCGTGTTCGCCCTGGTGGCG…	ATGGTCCAGGGCACCACCTCGGACGCCGGCAAGAGCACCCTGGTGACCGCGCTGTGCCGCTGGCTGGCCCGGCGCGGCGTCGCGGTGGTGCCGTTCAAGCCGCAGAACATGGCGCTGAACAGTGCGGTCACCGCCGACGGCGGCGAGATCGGCCGCGCCCAGGCGGTCCAGGCCCAGGCCTGCCGGCTGGCGCCGCACACCGACATGAACCCGGTGCTGCTCAAGCCGAACACCGACATCGGCGCCCAGGTGATCATCCATGGCCGCGCGGTGACCAGCATGGACGCCGCCGCCTACCACGACTACAAGCGCGTGGCGATGGAAGCGGTGCTGGCTTCCCATGGGCGGCTCGCCGCCGCCTACCGGGTGGTGATGGTGGAGGGCGCCGGCTCGCCGGCG…	ATGGCCAGCCTGTTCCTCGGCCGCAAGGAAATCGACGACGACCTGCTCGACGACATCGAGACGCGCCTGCTGACCGCCGACGTCGGCGTCGAGGCCACCACCCTGATCGTGCAGAACCTGACCAAGCGCGTGGCGCGCAAGGAGCTGGCCGACAGCGGCGCGCTGTACAAGGCGCTGCAGGAAGAGCTGGCCAGCCTGCTGCGCCCGGTGGAGCAGCCGTTGCAGGTCGACGTCGCGCGCGAGCCCTATGTGATCCTGGTGGTTGGGGTGAACGGCGTGGGCAAGACCACCACCATCGGCAAGCTGGCGAAGAAGCTGCAACTCGAGGGCAAGAAGGTCATGCTGGCCGCCGGCGACACCTTCCGCGCCGCCGCCGTGGAGCAGTTGCAGGTCTGGGGC…	TTGCGTATCGAGAACTTCGCGCCCATCGACAGCCAGGGTTTCCGTTTCCTGCTCCGGCCGGGGGATGAGCCTCTGCTCGCGGTCCTCGATCGAGCCCTGCCGCGTATCAATGGGCGCTACGGCGACGAACTGTTGCGCAGTTGGAGCGCCGGGCGGCGCCTGCGTTTCGACGAGCCCAGGGTGACGCTTGCGCCGGCGGAACAGCGTTGGCTCTCCACGCATCCGGTCGTGCCGGTGGTGATCAACCATTCCCTTGGCGCGCTCGGGCAACTGGATAGCGAGGGGCGGCTGAGCGGTATCGGGCGTGACTATCTGGACCTGATCGGCAAGCGCAGCGGCCTGCAGTTTTCCTTCAGCGGAGCCCGAAACTTCGTCGAGGCGAAACGTCGACTGGATGCG…	CGAGCCACCGCCCGCAGACGACTACTACGAAGTCGACATGGATACCCTGGCCTACCTGGATGCCGCGCCCGAGCCTGACGTGGTCGTGGTGGAGGAGCCGCTGCCGGCGGCGAAGCCGGCCACCGGCCTGGCCGCGGAGTGGCTGGAGCTGTTCCCGCGGCTCGGCCTCGGCGGCCTGACCGCCAGCATCGGTGCCAACTGTACGCTGGTAGCTGCCGACGGCGACCACTGGCATCTGCATCTCGATCCGGGCCAGAGCGCGCTGTTCAACGCCACCCAGCAGCGGCGGCTGAACGATGCGCTGAACCAGCACCTGGGGCGCACCCTCAAACTGGAGGTGACCCTGCAGAAGCCTGAGCAGGAGACCCCGGCCCAGGCAGCGGCACGCCGGCGTGCCGA…	ATGTCGCAGACGCCGTCCCTCGCCCAGCTCCAGCCCGCCGATGCCTTCCTGCGCCGCCACCTCGGCCCCGATCCGGCGGAACAGCAGGCCATGCTGGATTTCCTCGGAGTTTCCACTCGCGCCGAACTGATCGTGCAGACGGTGCCGCCGGCGATCCGCCTCAACCGGCCGCTGGAACTGCCCGCCGCGCTCGACGAACAGGCCGCCCTGGCGCGCCTGCGCGGCTACGCCGGGCTCAACCAGCGCTGGACCAGCCTGATCGGCATGGGCTACTACGGCACCGTGACGCCGCCGGTGATCCTCCGCAACGTGCTGGAGAATCCCGGCTGGTACACCGCCTATACGCCCTACCAGCCGGAAATCGCCCAGGGCCGCCTGGAAGCGCTGCTGAATTTCCAG…	GTGATCCTCGCCGACGAGCAGGAAGAGTTCGGCGGCAGCCTGCTGGACACCCGCGAGACCCTCGACGGCAAGCCCGCCGCCGAGTGGGTCGCGGACGCCGTGGCCGAGCTGCAAGGCCTGCCGGAAGTCATCCTGCTACCGCGCTCCACGGTCAACGGCTACCACGACCACAACTTCCTCACCATCCACGAGCGGCGCACCGACCACCTCGGCGAGGTCGCCCCGCTCGGCCAGGTCCGCCAGCGCGTGCACCGCGTACGCGCCAAGCGCGTGGTACTGGCCGCCGGCGCCCATGAGCGGCCGCTGGTCTACGGCAACAACGACCTGCCCGGCAACATGCTCGCCGGCGCGGTTTCCACCTATGTACGGCGCTACGGCGTGGCACCGGGCAAGAAACTG…	GTGCGCAGCTATCTCGAATGGCTGCTGGACAACCACTTCACCTTCCTCGGCTACGAGGAATTCACCGTCGCCGACGAGGCCGACGGCGGGCGCATGGTCTACGACGAGAAATCCTTCCTCGGCCTGACCCGTCTGCTGCGCGCCGGCCTGAGCAAGGATGACCTGCACATCGAGGACTATGCCGTCGCCTACCTGCGCGAACCGGTCCTGCTGTCCTTCGCCAAGGCCGCCCATCCGAGCCGTGTGCACCGCCCGGCCTACCCGGACTACGTGTCGATCCGCGAGCTGGACGGCAAGGGCCGGGTGATCCGCGAGTGCCGCTTCATGGGCCTGTTCACCTCCTCGGTGTACAACGAGAGCGTCAACGACATTCCCTTCATCCGCGGCAAGGTCGCCGAA…	GTGTACGGCGAATATTCTCGGGAAAGCATTACCTGCCTGCTCGCCATACTGTTATCCGGCCATCACTACTTATATATAGACCTGAAACAACCGGCGGCCTGGAATGCAGAGTTGTGCCGGCAGGTCGATTGCCGCCTGATCCTCGACTGCTCGACCACGCCGACGCCGGCCAACGGTCTTCCCTGCGTCCCGGTCAGGCACCTGCCTGCCGCTCCAGCCTCGGTCGCCCGGCCATGCTTCGCGGCGGACCAGATCGCCTACATCAACTTCTCCTCGGGCACCACCGGCCGCCCGAAAGCCATCGCCTGCACCCACGCCGGCATTACCCGCCTGTGCCTGGGCCAGTCGTTCCTCGCGTTCGCTCCGCAGATGCGCTTCCTGGTGAACTCGCCGCTGTCC…	CTGCTGGAAGAAGGTGCGGACGAGGTATTCGAGGAAATCCTCGCCGCCGTTACGTCCTACTTCCAGACGCCCATCGCGCTCATTTCCATCCTCGACCATCAGCGCCAGTGGTTTCGCGCGAGCATCGGCCTCGATATCCGGCAGACGCCGCGACGGGATTCGTTCTGCGCCTATGCGATCCTGGGCAAGGGAGTCTTCGAGGTGGCCGACGCCACTCTCGACCCGCGCTTCCGGGACAATCCCTATGTGCAAGGCGAACCGCGCATCCGCTTCTACGCCGGGGCTCCGCTGGCCACCGCGGAAGGTCTCAACCTCGGCAGCCTCTGCGTCATCGACCGGGAACCACGCGGGCCGCTGGCCGAGCGGGACGTCGCCATGCTCGAGCACTTCGCCCGGCTG…	ATGTCCCTGAGTGTCTTCGATCTGTTCAAGATCGGCATCGGGCCGTCCAGCTCCCACACCGTGGGGCCGATGCGTGCCGCCGCGCGCTTCGCCGAGGGGCTGAGGCGCGAGGGGTTGCTGGAGGCCACTGCCAGCGTCAAGGTCGAGCTGTACGGCTCGCTTGGCGCCACCGGCAAGGGCCACGGCAGCGACAAGGCGGTACTGCTCGGCCTGGAGGGCGAGCAGCCGGACAAGGTGGATACCGCCGCGATTCCCGCTCGGCTCGATGCCATCCGTTCCAGCGGCGAGCTGCGCCTGCTCGGCGAGCGGCCGATCCGCTTCGTCGAGAAGGAACACCTTGCGCTGATCCGCAAGCCGCTGGCCTACCATCCCAACGGCATGATCTTCCGTGCCTTCGAC…	ATGAACAGAGTTTTCCTGACCCCGGCAGCCGTGGCGCTGTGCGGCGCGTCTTCCCTGAGCCTGGCCGAACCGGTCAGCCTTGCCGACCAGGTGGTGACCGCCACCCGTACCGCCCAGACCGCTTCCCAGAGCCTGGCGGCGGTGAGCGTCATCGACCGCGAGGATATCGAGCGCAGCCAGGCGCGCAGCGTGCCGGAGCTGTTGCGCCAGGTACCCGGCGTGTCGCTGGCGAACAACGGCGGTTTCGGCAAGAACACCACGCTGTTCCTGCGCGGCACCGAGTCCGACCATGTGCTGGTGCTGATCGACGGCATCAAGGTCGGCTCGGCCAGCGCCGGCCTCACCGCGTTCCAGGACTTGCCGGTGGAGCTGATCGAGCGCATCGAGGTGGTCCGCGGG…	GTGCGGGTGCTCAACTGGAGCTGGGGCATCCACCGCGTCGGCGCTCGCGACGTCGATGGCGACGAGGTGGATTCGCTGGTGCGCTCGGGGATTGCCATGAGCGGCTACGAGGAGTTGCTCGAGGAGTTCTTCCTCTGGCTGCGCAAGAAGCATCCGGACGTGCTGGTGGTCAACTCCGCCGGCAACGGCTCGTCCTACTCCGGTACCGACGAATACCGCCTGCCGTCCTCCTTCGTCACCGAGCAGTTGCTGGTGGTGGGCGGCCACCAGCGCAGCGAGCGCCAAGGCCTGGCGGTGGACGACCCGGCCTACGCGGTCAAGCGCAGCACCTCGAACGTCGACATGCGGGTGGATGTCACCGCCGCCGCCTGTACCCATGCCTCGACCCTGGAGCGGGAC…	TTGCAGGCGGCTTGCGCGTTCGGCCCGCCCGGGCGGCTGTTCCGCGCCTGCGACGAGCAAGGACGCGAGGCGTTGCTGCTGCTCGCGGCGGCCGATGCCGACGAAGCGTTCTGGCAGCGCGAATGGGCACTGCGGCGCTGCCGTGCGGAGAGCCTGCCGCGAGTATTGTCGTCGCCCCGGTTGCGTCGTCATGCCTTCCAGTTGTTCGCTCCGCCGCGCTGGCCGATGCGCAGCCTGCTGGATTGGGCGCCAGCGCACCTGCCGCTGGAACCGCAATGCGCGCTGGTCCTCCTGGAGCAACTTATCGATGCGGTTCGCGCCTTGCAGCGGCGCGGTGTACAGGGCTTGTGGCTGGCGCCGCGGCAGATCCTGCTGGACGAGGGCGGGCGCCTGCTGTTC…	ATGTTCAACCCGGCCAACCAGACCCACTTCAGCCTCACCCTCGACGGCCTCCGCCACGACCTGCAGGTCCTCGCCTTCAACGGCCACGAAGGCATCAGTCGCCCCTACCGTTTCGAACTCGAACTGGTCGGAGAGCGCGCCGGCCTCGACCTCGAAACGTTCCTCCACCGGCCCGCCTTCCTCTCCTTCACCCCGCAGGGCCAGGGTGTCCACGGCCTGGTCTACGGCGCTGCCCAGGGCGATGCCGGCAAGCGCCTGACCCGCTATCGCCTCACCCTCGTCCCACACCTGGCCTACCTCGCCCAGCGCAACAACCAGCGGATCTTCCAGCACCTCACGGTGCCGCAGATCGTCGCCCTGATCCTCGAGGAGCACGGCATCCTCGCCGACGCCTACCGC…	GTGGCTCTCCATCGCCTGGCCTTTATCTTCCTGTGCCTGCCGCTCATGGCCAGCGCCGCCCCCTTCACCTCCCCCGGCGACCGCGACCTGATCCGCGACCGCCAGCAGCGCCTGCTGGACGAACAGCGCAAGCGCCTGGAGGAACTCCAGCAACTGCCCGGCAAGGGAGCGCCCGCCGCTGCGGATGCCTCCGGCGACGACGAGCGCTGCTTCGAGATCCGCCGCATCGAGCTGGAAGGCGCCGGGCACCTCGGCGAAAGCGCGCGTCGCCAACTGCTGGCGCCCTACCAGGGGCGCTGCCTGGGCGTCGGCCAGCTCAATGCGCTGCTCAAGGCCGTCACCGACCATTACCTGGATCGCGGCTACGTCACCACCCGCGCCTACCTGCCACAGCAGGAC…	ATGGGTGACCGGCACGACTACGTCGCTCTGGAGTGGGTGAAAGGCGAGATCGCCGAAACCCTGAAACAGGCGCGCCAGGCGCTGGAAGCGTTCGTCGAGAACCCGCAGGACCCGACCCGCATGCGGTTCTGCCTGACCTACGTGCACCA---GGTGCAGGGCACCCTGCAGATGGTCGAGTTCTACGGCGCGGCCCTGCTCGCCGAGGAAATGGAGCAGTTGGTCCAGGCCTTGCTGGACGGTCGCGTGCCGAACCAGGGCGAGGCCCTGGAAGTGCTGATGCAGGCGATCCTGCAACTGCCGGTCTACCTCGACCGGATCCAGACCGCCCGGCGCGACCTGCCGATGGTGGTCCTGCCGCTGCTCAACGACCTGCGCGCCGCGCGCGGCGAGAAGCTG…
18	ATGACCTTCGACGCCGCGTTCCAGCAGCTCGGCGAGCGGATGGCCGGCGGGGCCCTGGCGGAAACGGCGCTGGCGCCGTTCACCCATCTGCTGATCGACGAGTTCCAGGATGTCTCGCCGCAGATCGTCCTCTGGCTACAGGCGTTGCACCGTCGCCTGGCAA---CCCAGGGCACCGCGCCGAGCCTGATGGCCATCGGCGACGACTGGCAGTCGATCTACGGCTGGCGCGGCAGTTCGCCGGAGCTGTTCATCGACTTCGACCGGCATTTCCCTTCGCGTGGGCGGGGACGCAAGAGCGCGCTGCTGGTGCTGGAAACCAACTACCGCTCCGTCGAACCGATCATTCGCGACGGCGAGAAGGTGCTGGCCGGGGTGCGTTTCAAGCAGGACAAGACC…	ATGCACCTGTTGCGCACCCAACCCGGCGGCTTCGTTCCCGACGACGGCATCGCCCACCTGGCCCAGACTCCCGCCGAGCTGGTGATCCTCTGCAGCGGCGATTCGCACCTCGCATTGCTGGCCGAGGCCGCCCGTGCGCTGCCGGACGACTACCCGAGCCTGCGCCTGGCCAACCCCATGCAGTTGCAGAACCACGCCTCGGTGGACCTCTACGTCGAGGAAGTGCTGCGGCACGCGCGGGTGATCCTGCTTTCGCTGCACGGCGGCATCGGCTACTGGCGCTACGGCGTGGAGCAACTGGTGGCGCTGGCCGAGCGCGGCGCGCTGCTGATCCCGGTGCCCGGCGACGACCGCCCCGACCCGGAGCTGAGCGCCCTTGGCAACCTGCCGGCGGAGCAG…	ATGTTCGAACGCATCATCCAATTCGCCATCGAGCAACGCTGGCTGGTCCTGCTGGCGGTGCTGGGGATGGCCGGGGTCGGCATCGGCAGCTACCAGAAGCTGTCCATCGACGCGGTCCCGGACATCACCAACGTCCAGGTGCAGATCAATACCGCCGCCCCCGGCTACTCGCCGCTGGAAGTGGAGCAGCGGATCACCTACCCGGTGGAGACCGTCATGGCCGGCCTGCCGGGTTTGCAGGAAACCCGTTCGCTGTCGCGGCCGGGGATTTCCCAGGTGACGGTGATCTTCGAGGAGGGCACCGATATCTACTTCGCCCGCCAGCAGGTCAACGAACGCCTGAGCACGGCGCGCGAGCAACTGCCGGAAGACATCTCGCCGACCCTCGGGCCGATCTCC…	ATGTCCTTCAACCTTTCCGCCTGGGCGTTGCAGAATCGCCAGATCGTCCTGTACCTGATGATCCTGCTTGGCGCGGTTGGCGCGCTGTCCTACAGCAAGCTGGGGCAGAGCGAAGACCCGCCGTTCACCTTCAAGGCCATGGTGGTGCAGACCAACTGGCCGGGTGCCAGCGCCGAAGAGGTGGCCCGGCAGGTCACCGAGCGTATCGAGAAGAAGCTGATGGAAACCGGCGACTACGATCGCATCGTGTCCTTCTCCCGCCCCGGCGTCTCGCAGGTGACCTTCATGGCCCGCGAGGACATCCATTCCAGCGAGATCCCCGAACTCTGGTACCAGATCCGCAAGAAGATCAGCGACATTCGCGCCACCTTGCCGCAAAGCATCCAGGGCCCGTTCTTC…	ATGCGCACCGAGCAACCGAAAGTCATCCACCTCAAGGACTATCAGGCGCCGGACTACCTGATCGACGAGACCCACCTGAAGTTCGAACTGTTCGAAGACCACAGCCTGGTACACGCCGAGCTGAAGCTGCGGCGCAACCCCGAGCGCGGCGCCGGCCTGCCGCCGCTGTTGCTGCATGGCCAGCAACTGGAGCTGCTGGCGCTCGAACTGGACGGCCAGGCGCTCGGCGCGGACGACTACCAGCTGGACGACGAGCAGCTCGGGGTGCAACCGCGGCAGGCCGAGTTCGTCCTCAGGAGCACGGTGCGTATCCATCCGGAGAGCAACACCGCGCTGGAAGGCCTGTACAAGTCCGGCAAGATGTTCTGCACCCAGTGCGAGGCCGAGGGTTTCCGCAAG…	ATGACCGATAACCTGAACCTCGGCGCCATCGACCTGGGCACCGACGACGAATTCATCGCCCGCCATATCGGCCCGCGTGCCGCCGACACCCAGGCCATGCTCCAGCGCCTGGGCTACGACTCGCTGGACGCGCTGATCGGCAACGTGATCCCCGACAGCATCAAGGGCAGCAGCGTGCTCGACCTGCCGGCCGGCATGGGCGAGGCCGAGGCGCTGGCCAGCCTGAAGGCGATCGCCGCGCGCAATCGCGCGTTGCGTTCCTTCATCGGCCAGGGCTACTACAACTGCCACACCCCGGCACCGATCCTGCGCAACCTCCTGGAGAACCCGGCCTGGTACACCGCCTACACGCCGTACCAGCCGGAAATCTCCCAGGGCCGCCTGGAGGCGCTGCTGAAC…	GCAGGTTTCCCATGACGAGCTGGTCGCTCGCCTGTCCATGGTCGGCCTCGAGGTCGACGCCGACCTGCCGGTCGCCGGCGCCTTCAGCGGCGTGGTGGTCGGTGAGGTGCTCTCGACCGAACAGCATCCGGACGCCGACAAGCTGCGCGTCTGCCAGGTCAGCAACGGCAGCGAGACCTTCCAGGTCGTCTGCGGTGCGCCCAACGTGCGCGCGGGCCTGAAGATTCCCTTCGCCATGATCGGCGCCGAACTGCCGGGCGACTTCAAGATCAAGAAAGCCAAGCTGCGTGGCGTCGAGTCCTTCGGCATGCTCTGCTCGGCCAAGGAATTGCAGATCAGCGAAGAGAACGCCGGTCTGCTCGAGCTGCCGGCCGACGCGCCGGTCGGCCAGGACGTCCG…	ATGAGCGAGAACAACACGTACGACTCTTCCAGCATCAAGGTGCTGAAGGGGCTGGATGCCGTACGCAAGCGCCCCGGCATGTACATCGGCGACACCGACGATGGCACCGGTCTGCACCACATGGTGTTCGAGGTGGTGGATAACTCCATCGACGAAGCGCTGGCCGGTTACTGCAGCGAAATCAGCATCACCATCCATACGGATGAGTCGATCACTGTCCGCGACAATGGACGCGGTATTCCGGTGGATATCCACAAGGAAGAAGGGGTTTCTGCGGCGGAAGTGATCATGACCGTCCTCCACGCCGGCGGCAAGTTCGACGACAACACCTACAAGGTGTCCGGCGGCTTGCACGGTGTGGGCGTCTCGGTGGTGAACGCGCTGTCCCATGAACTACGC…	ATGCTGATCCTGCGCGGCGCTCCCGCCCTTTCCGCTTTCCGCCACGGCAAACTGCTCGAGCAACTGACCCAGCACGTACCTGCCGTTACCGGGCTGTACGCTGAGTTCGCGCATTTCGCCGACGTCACCGGCGCGCTCACCGCCGACGAGGAGCAGGTGCTGGCGCGGCTGCTGAAATACGGCCCGAGCGTGCCGGTGCAGGAGCCCAGCGGACGGCTGTTCCTGGTGGTGCCGCGCTTCGGCACCATCTCGCCGTGGTCGAGCAAGGCCTCCGACATCGCCCGCAACTGCGGCCTGGCGAAGATCGACCGGCTGGAGCGCGGCATTGCCTACTATGTGCAGGGCGAACTGTCCGAGAGCGACGCCCAGCAGGTCGCCGCCCGCCTGCATGACCGCATG…	ATGAGTGGCCGCTCCGCTGGTTTCGCCCTGCCCAGCCGCGACGAGTGGCGGCGCGCGCTGGCCGAGTGGGCGCGCAGCGACGGGGCGACCTGGATCTACGTGTTCAAGGTGCTCTGCGCGGCCTTCCTAACCCTCTGGCTGGCGATGCGCCTGGAGTTGCCGCAACCGAGCACGGCGACCATCACCGTGTTCATCGTCATGCAGCCGCAGAGCGGCCAGGTGTTCGCCAAGAGCTTCTACCGCATCCTCGGCACCCTGGTCGGCCTCAGCGTGATGGTCACCCTGATCGCCCTGTTCGCCCAGGAGCGGGTGCTGTTCCTGCTCAGCTCGGCGATCTGGATCGGTCTCTGCACCGCCGGGGCCGCCCGCTACCGTGACTTCCGCTCCTACGCCTGCGTG…	ATGAGCGAATCCCTCGATCTGAGCCTGGAAGGGGTCGAACGCCGGTCGTTGGCCGAGTTCACCGAGCAGGCCTATCTGAACTATTCCATGTACGTGATCATGGACCGCGCCCTGCCGCATATCGGCGACGGCCTGAAACCGGTGCAGCGACGCATCGTCTACGCCATGAGCGAACTGGGGCTGGATGCCGATTCCAAGCACAAGAAGTCGGCGCGCACCGTCGGCGACGTGCTCGGCAAGTTCCACCCGCACGGCGACTCGGCCTGCTACGAGGCCATGGTGCTGATGGCGCAGCCGTTCTCCTATCGCTATCCGCTGGTGGACGGCCAGGGCAACTGGGGGGCGCCGGACGATCCCAAGTCCTTCGCCGCCATGCGTTATACCGAGGCGCGCCTGTCG…	ATGTCTTCACGCAAGATCGGGCTCAACCTGGTGGTCATCGTCGCCCTGGCCGCCCTCTTCACCGGCATCTGGGCCCTGTACAACCGTCCGGTCAGCGTACCGGACTGGCCGGAACGCATCTCCGGCTTCTCCTTCTCGCCGTTCCGCCTCAACCAGAACCCGCAGAGCGGCCGCTACCCCAGCGCCGAACAGATGCGCACCGACCTGGAACTGGTCGCCCGGCACACCCACAGCATCCGCACCTATTCGGTCCAGGGCGCGCTCGGCGACATCCCGGCGCTGGCCGAGGCGTTCGGCCTGCGCGTCAGCCTGGGCATCTGGCTCGGCCCGGACCTGGCCAGCAACGAGGCCGAGATCGCCCGCGCCATCCGCATCGCCAACGAGTCGCCGAGCGTGGTG…	ATGACCGCCATGCCCGAAGTACTTCGCGAAGATACGCTGAACATCCCCGACAGCCGTGGGCTGAATCTCTACACCTGCGATCCGGCCCTGGAGCGGCTGCTGGAGGTATACCTGCCGCCGGCGTTGCTCGCCGAATGGCGGCCGCTCCTCGAACGGCTCGGCGCCCGTGCCGGCGGCGAGCTGGACGTGCTGGCGCTGGCGGCGGACAAGAACCCGCCGGTGCTGGCGCCGCGCACCCGCCGCGGCGAGGATTTGCAGAGCATTCGCAAGCATCCGGACTACGTCGCCCTCGAACAGGTGGCCTATGCCGAACTTGGCCTGGCTTCCATGAGCCATCGCCCGGACGGCCCGCCGCCGCTGGTGAAGTATGCGCTCACCCACCTGTTCGTACAGGCCGAG…	ATGTCCGAATTCTTCATCAAGCGGCCGAACTTCGCCTGGGTGGTGGCCCTGTTCATCTCCCTGGCCGGCCTGCTGGTCATTTCCAAATTGCCGGTAGCGCAGTACCCCAATGTCGCGCCGCCACAGATCACCATCACCGCCACCTATCCCGGCGCCTCGGCGAAGGTGCTGGTGGACTCCGTCACCAGTGTGCTCGAGGAGTCGCTGAACGGCGCCAAGGGCCTGCTCTACTTCGAGTCGACCAACAACTCCAACGGCACCGCCGAGATCGTCGTCACCTTCGAGCCGGGCACCGATCCGGACCTGGCCCAGGTGGACGTGCAGAACCGCCTGAAGAAAGCCGAGGCGCGCATGCCGCAGGCGGTGCTGACCCAGGGCCTGCAGGTCGAGCAGACCAGC…	ATGAGCCAGCAGCAGATGCCCGTGGCCCTCGATCCGCTGGACTTCCCGTTGCACGGCAGCCGCCTGATCGAGGCCAGCGCCGGTACCGGCAAGACGTTCACCATCGCCCTGCTATACGTACGCCTGGTCCTCGACCATGGCGGCGAGAACGCTTTCGGCCGGCCGCTGAGCCCGCCGGAAATCCTCGTGGTGACCTTCACCGATGCGGCGACCCAGGAACTCCGCGAGCGTATCCGCAGCCGCCTGGGCGAAGCGGCGCGTTGTTTCGCCGAGCCGCAGGAGCGCCACGACGGCCTGCTGGTCGCGTTGCGCCAGCAGTATCCCACCGAGCGCTGGCCGGGCTGCGCGCGCCTGCTGCGCCTGGCCGCGGAGTGGATGGACGAGGCCGCGGTATCGACC…	ATGAGGCGCGCCAGCCTGCATATGTTGCTCTGCCAGTTCGCCATGGCCCTGGGCCTGCTCCTGAGCCTGGGCAGCGAGGCCTGGGCCGCCAGGCCGGCTCCGCAGGCGGCCGTCGACCTGGAAGCGCCGGCCGCCCTGGCCGAGGACGCCAGCCTCGACCAGCTCAACGCGCAACTCGACCTGATCCGCCAGCGCGTCACCACTGACGCCAGCGACGACCTCCTCGCCGAGTTGCGCCAGAGCGCGCTGCAAGTCCAGCGCCAGGCCGACGCCCTGCTCGCGCTGCGGGTGGCCGACATCGAGCGGCTCGACGATCAGTTGAAAGTGATCGGCCCGCCGCAGCCCGACGAGGCGGAAAGCCTCGCCGCCCAGCGCCAGGCCCTGACCCGGCAGAAGAAC…	CTGCTGTTCGCCGCAGTGGTCATCGGCTTCCCCCAGCGCGCCGGCGAATGGCTGCTGGCCGCGCAGACCTGGGCCTCGCAGACCGTCGGCTGGTACTACCTGCTGGCGATGACGCTGTACCTGATCTTCGTGGTGGTCACCGCGCTTTCCGGCTACGGCAAGATCAAGCTCGGTGCCGACCACGACGAGCCGGAATTCAGCTACCTGTCCTGGGCCGGCATGCTGTTCGCCGCCGGCATCAGCATCACCCTGTTCTTCTTCTGCGTATCCGAACCGCTGACCCACTTCCTCCAGCCGCCGCAAGGCGAGGCCGGTACCCAGGAAGCCGCGCGGCAGGCCATGGAACTGCTGTTCCTGCACTGGGGCCTGCACGGCTGGGGCGTATTCGCCCTGGTGGCG…	ATGGTCCAGGGCACCACCTCGGACGCCGGCAAGAGCACCCTGGTGACCGCGCTGTGCCGCTGGCTGGCCCGGCGCGGCGTCGCGGTGGTGCCGTTCAAGCCGCAGAACATGGCGCTGAACAGCGCGGTCACCGCCGACGGCGGCGAGATCGGCCGCGCCCAGGCGGTACAGGCCCAGGCCTGCCGGCTGGCGCCGCACACCGACATGAACCCGGTGCTGCTCAAGCCGAACACCGACATCGGCGCCCAGGTGATCATCCATGGCCGCGCGGTGACCAGCATGGACGCCGCCGCCTACCACGACTACAAGCGCGTGGCGATGGAAGCGGTGCTGGCTTCCCATGGGCGGCTCGCCGCCGCCTACCGGGTGGTGATGGTGGAGGGCGCCGGCTCGCCGGCG…	ATGGCCAGCCTGTTCCTCGGTCGCAAGGAAATCGACGACGACCTGCTCGACGACATCGAGACGCGCCTGCTGACCGCCGACGTCGGCGTCGAGGCCACCACCCTGATCGTGCAGAACCTGACCAAGCGCGTGGCGCGCAAGGAGCTGGCCGACAGCGGCGCGCTGTACAAGGCGCTGCAGGAAGAGCTGGCCAGCCTGCTGCGCCCGGTGGAGCAGCCGTTGCAGGTCGACGTCGCGCGCGAGCCCTATGTGATCCTGGTGGTCGGGGTGAACGGCGTGGGCAAGACCACCACCATCGGCAAGCTGGCGAAGAAGCTGCAACTCGAGGGCAAGAAGGTCATGCTGGCCGCCGGCGACACCTTCCGCGCTGCCGCCGTGGAGCAGTTGCAGGTCTGGGGC…	TTGCGCATCGAGAACTTCGCACCCATCGACAGCCAGGGTTTCCGTTTCCTGCTCCGGCCAGGTGACGAACCTCTGCTCGCGCTCATCGATCGCGCCCTGCCGCATATTAGCGGGCGCTACGGCGACGAACTGTTGCGCAGCTGGAGCGCCGGGAGGCGCCTGCGCTTCGACGATCCCCGGGTGACGCTGTCGCCGGCGGAACAGCGTTGGCTCTCCGCGCACCCGGTCGTGCCGGTGGTGATCAACCATTCCCTTGGCGCGCTCGGGCAACTGGATAACGAGGGGAGGCTGAGTGGTATCGGGCGTGACTATCTGGACCTGATCGGCAAGCGCAGTGGCCTGCAGTTTTCCTTCACTGGAGCACGCAACTTCGTCGAGACGAAAAGCCGACTGGATGCG…	CGAGCCACCGCCCGCAGACGACTACTACGAAGTCGACATGGATACCCTGGCCTACCTGGATGCCGCGCCCGAGCCTGACGTGGTCGTGGTGGAGGAGCCGCTGCCGGCGGCGAAGCCGGCCACCGGCCTGGCCGCGGAGTGGCTGGAGCTGTTCCCGCGGCTCGGCCTCGGCGGCCTGACCGCCAGCATCGGTGCCAACTGTACGCTGGTAGCTGCCGACGGCGACCACTGGCATCTGCATCTCGATCCGGGCCAGAGCGCGCTGTTCAACGCCACCCAGCAGCGGCGGCTGAACGATGCGCTGAACCAGCACCTGGGGCGCACCCTCAAACTGGAGGTGACCCTGCAGAAGCCTGAGCAGGAGACCCCGGCTCAGGCAGCGGCACGCCGGCGTGCCGA…	ATGTCGCAGACGCCGTCCCTCGCCCAGCTCCAGCCCGCCGATGCCTTCCTGCGCCGCCACCTCGGCCCCGATCCTGCGGAACAGCAGGCCATGCTGGACTTCCTCGGAGTTTCCACTCGCGCCGAACTGATCGTGCAGACGGTGCCGCCGGCGATCCGCCTCAACCGGCCGCTGGAACTGCCCGCTGCGCTCGACGAACAGGCCGCCCTGGCGCGCCTGCGCGGCTACGCCGGGCTCAACCAGCGCTGGACCAGCCTGATCGGCATGGGCTACTACGGCACCGTGACGCCGTCGGTGATCCTCCGCAACGTGCTGGAGAATCCCGGCTGGTACACTGCCTATACGCCCTACCAGCCGGAAATCGCCCAGGGCCGCCTGGAAGCGCTGCTGAATTTCCAG…	GTGATTCTCGCCGACGAGCAGGAAGAGTTCGGCGGCAGCCTGCTGGACACCCGCGAGACCCTCGACGGCAAGCCCGCCGCCGAGTGGGTCGCGGACGCCGTGGCCGAGCTGCAAGGCCTGCCGGAAGTCATCCTGCTACCGCGCTCCACGGTCAACGGCTACCACGACCACAACTTCCTCACCATCCACGAGCGGCGCACCGACCACCTCGGCGAGGTCGCCCCGCTCGGCCAGGTCCGCCAGCGCGTGCACCGCGTACGCGCCAAGCGCGTGGTACTGGCCGCCGGCGCCCATGAGCGGCCGCTGGTCTACGGCAACAACGACCTGCCCGGCAACATGCTCGCCGGCGCGGTTTCCACCTATGTACGGCGCTACGGCGTGGCACCGGGCAAGAAACTG…	GTGCGCAGCTATCTCGAATGGCTGCTGGACAACCACTTCACCTTCCTCGGCTACGAGGAATTCAGCGTCGCCGACGAGGCCGACGGCGGGCGCATGGTCTACGACGAGAAATCCTTCCTCGGCCTGACCCGTCTGCTGCGTGCCGGCCTGAGCAAGGATGACCTGCACATCGAGGACTATGCCGTCGCCTACCTGCGCGAACCGGTCCTGCTGTCCTTCGCCAAGGCTGCCCATCCGAGCCGTGTGCACCGCCCGGCCTACCCGGACTACGTGTCGATCCGCGAGCTGGACGGCAAGGGCCGGGTGATCCGCGAGTGCCGCTTCATGGGCCTGTTCACCTCCTCGGTGTACAACGAGAGCGTCAACGACATCCCCTTCATCCGCGGCAAGGTCGCCGAA…	GTGTACGGCGAATATTCTCGGGAAAGCATTACCTGCCTGCTCGCCATACTGTTATCCGGCCATCACTACTTATATATAGACCTGAAACAACCGGCGGCCTGGAATGCAGAGTTGTGCCGGCAGGTCGATTGCCGCCTGATCCTCGACTGCTCGACCACGCCGACGCCGGCCAACGGTCTTCCCTGCGTCCCGGTCAGGCACCTGCCTGCCGCTCCAGCCTCGGTCGCCCGGCCATGCTTCGCGGCGGACCAGATCGCCTACATCAACTTCTCCTCGGGCACCACCGGCCGCCCGAAAGCCATCGCCTGCACCCACGCCGGCATTACCCGCCTGTGCCTGGGCCAGTCGTTCCTCGCGTTCGCTCCGCAGATGCGCTTCCTGGTGAACTCGCCGCTGTCC…	CTGCTGGAAGAAGGTGCGGACGAGGTATTCGAGGAAATCCTCGCCGCCGCTACGTCCTACTTCCAGACGCCCATCGCGCTCATTTCCATCCTCGACCATCAGCGCCAGTGGTTTCGCGCGAGCATCGGCCTCGATATCCGGCAGACGCCGCGACGGGATTCGTTCTGCGCCTATGCGATCCTGGGCAAGGGAGTATTCGAGGTGGCCGACGCCACCCTCGACCCGCGCTTCCGGGACAACCCCTATGTGCAAGGCGAACCGCGCATCCGCTTCTACGCCGGGGCTCCGCTGGCCACCGCGGAAGGTCTCAACCTCGGCAGCCTCTGCGTCATCGACCGGGAACCACGCGGGCCGCTGGCCGAGCGGGACGTCGCCATGCTCGAGCACTTCGCCCGGCTG…	ATGTCCCTGAGTGTCTTCGATCTGTTCAAGATCGGCATCGGGCCGTCCAGCTCCCACACCGTGGGGCCGATGCGTGCCGCCGCGCGCTTCGCCGAGGGGCTGAGGCGCGAGGGGTTGCTGGAGGCCACTGCCAGCGTCAAGGTCGAGCTGTACGGCTCGCTCGGCGCCACCGGCAAGGGCCACGGCAGCGACAAGGCGGTACTGCTCGGCCTGGAGGGCGAGCAGCCGGACACGGTGGATACCGCCGCGATTCCCGCCCGGCTCGATACCATCCGTTCCAGCGGCGAGCTGCGCCTGCTCGGCGAGCGGCCGATCCGCTTCGTCGAGAAGGAACACCTGGCGCTGATCCGCAAGCCGCTGGCCTACCATCCCAACGGCATGATCTTCCGTGCCTTCGAC…	ATGAACAGAGTTTTCCTGACCCCGGCAGCCGTGGCGCTGTGCGGCGCGTCTTCCCTGAGCCTGGCCGAACCGGTCAGCCTTGCCGACCAGGTGGTGACCGCCACCCGTACCGCCCAGACCGCTTCCCAGAGCCTGGCGGCAGTGAGCGTCATCGACCGCGAGGATATCGAGCGCAGTCAGGCGCGCAGCGTGCCGGAGCTGTTGCGCCAGGTACCCGGCGTGTCGCTGGCGAACAACGGCGGTTTCGGCAAGAACACCACGCTGTTCCTGCGCGGCACCGAGTCCGACCATGTACTGGTGCTGATCGACGGCATCAAGGTCGGCTCGGCCAGCGCCGGCCTCACCGCGTTCCAGGATTTGCCGGTGGAGCTGATCGAGCGCATCGAGGTGGTCCGCGGG…	GTGCGGGTGCTCAACTGGAGCTGGGGCATCCACCGCGTCGGCGCTCGCGACGTCGATGGCGACGAGGTGGATTCGCTGGTGCGCTCGGGGATCGCCATGAGCGGCTACGAGGAGTTGCTCGAGGAGTTCTTCCTCTGGCTGCGCAAGGAGCATCCGGACGTGCTGGTGGTCAACTCCGCCGGCAACGGCTCGTCCTACTCCGGTACCGACGAATACCGCCTGCCGTCCTCCTTCGTTACCGAGCAGTTGCTGGTGGTGGGCGGCCACCAGCGCAGCGAGCGCCAAGGCCTGGCGGTGGACGACCCGGCCTACGCGGTCAAGCGCAGCACCTCGAACGTCGACATGCGGGTGGATGTCACCGCCGCCGCCTGTACCCATGCCTCGACCCTGGAGCGGGAC…	TTGCAGGCGGCTTGCGCGTTCGGCCCGCCCGGGCGGCTGTTCCGCGCCTGCGACGAGCAAGGACGCGAGGCGTTGCTGCTGCTCGCGGCGGCCGATGCCGACGAAGCGTTCTGGCAGCGCGAATGGGCACTGCGGCGCTGCCGTGCGGAGAGCCTGCCGCGAGTATTGTCGTCGCCCCGGTTGCGTCGTCATGCCTTCCAGTTGTTCGCTCCGCCGCGCTGGCCGATGCGCAGCCTGCTGGATTGGGCGCCAGCGCACCTGCCGCTGGAACCGCAATGCGCGCTGGTCCTCCTGGAACAACTTATCGATGCGGTTCGCGCCTTGCAGCGGCGCGGTGTACAGGGCTTGTGGCTGGCGCCGCGGCAGATCCTGCTGGACGAGGGTGGGCGCCTGCTGTTC…	ATGTTCAACCCGGCCAACCAGACCCACTTCAGCCTCACCCTCGACGGCCTCCGCCACGACCTGCAGGTCCTCGCCTTCAACGGCCACGAAGGCATCAGTCGCCCCTACCGTTTCGAACTCGAACTGGTCGGAGAGCGCGCCGGCCTCGACCTCGAAACGTTCCTCCACCGGCCCGCCTTCCTCGCCTTCACCCCGCAGGGCCAGGGTGTCCACGGCCTGGTCTACGGCGCTGCCCAGGGCGATGCCGGCAAGCGCCTGACCCGCTATCGCCTCACCCTCGTCCCGCACCTGGCCTACCTCGCCCAGCGCAACAACCAGCGGATCTTCCAGCACCTCACGGTGCCGCAGATCGTCGCCCTGGTCCTCGAGGAGCACGGCATCCTCGCCGACGCCTACCGC…	GTGGCTCTCCATCGCCTGGCCTTTATCTTCCTGTGCCTGCCGCTCATGGCCAGCGCCGCCCCCTTCACCTCCCCCGGCGACCGCGACCTGATCCGCGACCGCCAGCAGCGCCTGCTGGACGAACAGCGCAAGCGCCTGGAGGAACTCCAGCAACTGCCCGGCAAGGGAGCGCCCGCCGCTGCGGATGCCTCCGGCGACGACGAGCGCTGCTTCGAGATCCGCCGCATCGAGCTGGAAGGCGCCGGGCACCTCGACGAAAGCGCGCGTCGCCAGTTGCTGGCGCCCTACCAGGGGCGCTGCCTGGGCGTCGGCCAGCTCAATGCGCTGCTCAAGGCCGTCACCGACCATTACCTGGATCGCGGCTACGTCACCACCCGCGCCTACCTGCCACAGCAGGAC…	ATGGGTGACCGGCACGACTACGTCGCTCTGGAGTGGGTGAAAGGCGAGATCGCCGAAACCCTGAAACAGGCGCGCCAGGCGCTGGAAGCGTTCGTCGAGAACCCGCAGGACCCGACCCGCATGCGGTTCTGCCTGACCTACGTGCACCA---GGTGCAGGGCACCCTGCAGATGGTCGAGTTCTACGGCGCGGCCCTGCTCGCCGAGGAAATGGAGCAGTTGGTCCAGGCCTTGCTGGACGGTCGCGTGCCGAACCAGGGCGAGGCCCTGGAAGTGCTGATGCAGGCGATCCTGCAACTGCCGGTCTACCTCGACCGGATCCAGACCGCCCGGCGCGACCTGCCGATGGTGGTCCTGCCGCTGCTCAACGACCTGCGCGCCGCGCGCGGCGAGAAGCTG…
19	ATGACCTTCGACGCCGCGTTCCAGCAGCTCGGCGAGCGGATGGCCGGCGGGGCCCTGGCGGAAACGGCGCTGGCGCCGTTCACCCATCTGCTGATTGACGAGTTCCAGGATGTCTCGCCGCAGATCGTCCTCTGGCTACAGGCGTTGCACCGTCGCCTGGCGA---CCCAGGGCACCGCGCCGAGCCTGATGGCCATCGGCGACGACTGGCAGTCGATCTACGGCTGGCGCGGCAGTTCGCCGGAGCTGTTCATCGACTTCGACCGGCACTTCCCCTCGCGTGGGCGGGGACGCAAGAGCGCGCTGCTGGTGCTGGAAACCAACTACCGCTCCGTCGAACCGATCATTCGCGACGGCGAGAAGGTGCTGGCCGGGGTGCGTTTCAAGCAGGACAAGACC…	ATGCACCTGTTGCGCACCCAACCTGGCGGCTTCGTTCCCGACGACGGCATCGCCCACCTGGCCCAGACTCCCGCCGAGCTGGTGATCCTCTGCAGCGGCGATTCGCACCTGGCATTGCTGGCCGAGGCCGCCCGTGCGCTGCCGGACGACTACCCGAGCCTGCGCCTGGCCAACCCCATGCAGTTGCAGAACCACGCCTCGGTGGACCTCTACGTCGACGAAGTGCTGCGGCACGCGCGGGTGATCCTGCTTTCGCTGCACGGCGGCATCGGCTACTGGCGCTACGGCGTGGAGCAACTGGTGGCGCTGGCAGAGCGCGGCGCGCTGCTGATCCCGGTGCCCGGCGACGACCGCCCCGACCCGGAGCTGAGCGCCCTCGGCAACCTGCCGGCAGAGCAG…	ATGTTCGAACGCATCATCCAATTCGCCATCGAGCAACGCTGGCTGGTCCTGCTGGCGGTGCTGGGGATGGCCGGGGTCGGCATCGGCAGCTACCAGAAGCTGTCCATCGACGCGGTCCCGGACATCACCAACGTCCAGGTGCAGATCAATACCGCCGCCCCCGGCTACTCGCCGCTGGAAGTGGAGCAGCGGATCACCTACCCGGTGGAGACCGTCATGGCCGGCCTGCCGGGTTTGCAGGAAACCCGTTCGCTGTCGCGGCCGGGGATTTCCCAGGTGACGGTGATCTTCGAGGAGGGCACCGATATCTACTTCGCCCGCCAGCAGGTCAACGAACGCCTGAGCACGGCGCGCGAGCAACTGCCGGAAGACATCTCGCCGACCCTCGGGCCGATCTCC…	ATGTCCTTCAACCTTTCCGCCTGGGCGTTGCAGAATCGCCAGATCGTCCTGTACCTGATGATCCTGCTTGGCGCGGTCGGCGCGCTGTCCTACAGCAAGCTGGGGCAGAGCGAAGACCCGCCGTTCACCTTCAAGGCCATGGTGGTGCAGACCAACTGGCCGGGCGCCAGCGCCGAAGAGGTGGCCCGGCAGGTCACCGAGCGTATCGAGAAGAAGCTGATGGAAACCGGCGACTACGATCGCATCGTGTCCTTCTCCCGCCCCGGCGTCTCGCAGGTGACCTTCATGGCCCGCGAGGACATCCATTCCAGCGAGATCCCCGAACTCTGGTACCAGATCCGCAAGAAGATCAGCGACATTCGCGCCACCTTGCCGCAAAGCATCCAGGGCCCGTTCTTC…	ATGCGCACCGAGCAACCGAAAGTCATCCACCTCAAGGACTATCAGGCGCCGGACTACCTGATCGACGAGACCCACCTGAAGTTCGAACTGTTCGAAGACCACAGCCTGGTACACGCCGAGTTGAAGCTGCGGCGCAACCCCGAGCGCGGCGCCGGCCTGCCGCCGCTGTTGCTACATGGCCAGCAACTGGAGCTGCTGGCGCTCGAACTGGACGGCCAGGCGCTCGGCGCGGACGACTACCAACTGGACGACGAGCAGCTCGGGGTGCAACCGCGGCAGGCCGAGTTCGTCCTCAGGAGCACGGTGCGTATCCATCCGGAGAGCAACACCGCGCTGGAAGGCCTGTACAAGTCCGGCAAGATGTTCTGCACCCAGTGCGAGGCCGAGGGTTTCCGCAAG…	ATGACCGATAACCTGAACCTCGGCGCCATCGACCTGGGCACCGACGACGAATTCATCGCCCGCCATATCGGCCCGCGTGCCGCCGACACCCAGGCCATGCTCCAGCGCCTGGGCTACGACTCGCTGGACGCGCTGATCGGCAACGTGATCCCCGACAGCATCAAGGGCAGCAGCGTGCTCGACCTGCCGGCCGGCATGGGCGAGGCCGAGGCGCTGGCCAGCCTGAAGGCGATCGCCGCGCGCAATCGCGCGTTGCGTTCCTTCATCGGCCAGGGCTACTACAACTGCCACACCCCGGCACCGATCCTGCGCAACCTCCTGGAGAACCCGGCCTGGTACACCGCCTACACGCCGTACCAGCCGGAAATCTCCCAGGGCCGCCTGGAGGCGCTGCTGAAC…	GCAGGTTTCCCATGACGAGCTGGTCGCTCGCCTGTCCATGGTCGGCCTCGAGGTCGACGCCGACCTGCCGGTCGCCGGCGCCTTCAGCGGCGTGGTGGTCGGTGAGGTGCTCTCGACCGAACAGCATCCGGACGCCGACAAGCTGCGCGTCTGCCAGGTCAGCAACGGCAGCGAGACCTTCCAGGTCGTCTGCGGTGCGCCCAACGTGCGCGCGGGCCTGAAGATTCCCTTCGCCATGATCGGCGCCGAACTGCCGGGCGACTTCAAGATCAAGAAAGCCAAGCTGCGCGGCGTCGAGTCCTTCGGCATGCTCTGCTCGGCCAAGGAATTGCAGATCAGCGAAGAGAACGCCGGTCTGCTCGAGCTGCCGGCCGACGCGCCGGTCGGCCAGGACGTCCG…	ATGAGCGAGAACAACACGTACGACTCTTCCAGCATCAAAGTGCTGAAGGGGCTGGATGCCGTACGCAAGCGCCCCGGCATGTACATCGGCGACACCGACGATGGCACCGGTCTGCACCACATGGTGTTCGAGGTGGTGGATAACTCCATCGACGAAGCGCTGGCCGGTTATTGCAGCGAAATCAGCATCACCATCCATACGGATGAGTCGATCACTGTCCGCGACAATGGACGCGGTATTCCGGTGGATATCCACAAGGAAGAAGGGGTTTCTGCGGCGGAAGTGATCATGACCGTCCTCCACGCCGGCGGCAAGTTCGACGACAACACCTACAAGGTGTCCGGCGGCTTGCACGGTGTGGGCGTCTCGGTGGTGAACGCGCTGTCCCATGAACTGCGC…	ATGCTGATCCTGCGCGGCGCTCCCGCCCTTTCCGCTTTCCGCCACGGCAAACTGCTTGAGCAACTGACCCAGCACGTACCTGCCGTTACCGGGCTGTACGCTGAGTTCGCGCATTTCGCCGACGTCACCGGCGCGCTCACCGCCGACGAGGAGCAGGTGCTGGCGCGGCTGCTGAAATACGGCCCGAGCGTGCCGGTGCAGGAGCCCAGCGGACGGCTGTTCCTGGTGGTGCCGCGCTTCGGCACCATCTCGCCGTGGTCGAGCAAGGCCTCCGACATCGCCCGCAACTGCGGCCTGGCGAAGATCGACCGGCTGGAGCGCGGCATTGCCTACTATGTGCAGGGCGAACTGTCCGAGAGCGACGCCCAGCAGGTCGCCGCCCGCCTGCATGACCGCATG…	ATGAGTGGCTGCTCCGCTGGTTTCGCCCTGCCCAGCCGCGACGAGTGGCGGCGCGCGCTGGCCGAGTGGGCGCGCAGCGACGGGGCGACCTGGATCTACGTGTTCAAGGTGCTCTGCGCGGCCTTCCTGACCCTCTGGCTGGCGATGCGCCTGGAATTGCCGCAGCCGAGCACGGCGACCATCACCGTGTTCATCGTCATGCAGCCGCAGAGCGGCCAGGTGTTCGCCAAGAGCTTCTACCGCATCCTCGGCACCCTGGTCGGCCTCAGCGTGATGGTCACCCTGATCGCCCTGTTCGCCCAGGAGCGAGTGCTGTTCCTGCTCAGCTCGGCGATCTGGATCGGCCTCTGCACCGCCGGGGCCGCCCGCTACCGTGACTTCCGCTCCTACGCCTGCGTG…	ATGAGCGAATCCCTCGATCTGAGCCTGGAAGGGGTCGAACGCCGGTCGTTGGCCGAGTTCACCGAGCAGGCCTATCTGAACTATTCCATGTACGTGATCATGGACCGCGCCCTGCCGCATATCGGCGACGGCCTGAAACCGGTGCAGCGACGCATCGTCTACGCCATGAGCGAACTGGGGCTGGATGCCGATTCCAAGCACAAGAAGTCGGCGCGCACCGTCGGCGACGTGCTCGGCAAGTTCCACCCGCACGGCGACTCGGCCTGCTACGAGGCCATGGTGCTGATGGCGCAGCCGTTCTCCTATCGCTATCCGCTGGTGGACGGCCAGGGCAACTGGGGGGCGCCGGACGATCCCAAGTCCTTCGCCGCCATGCGTTATACCGAGGCGCGCCTGTCG…	ATGTCTTCACGCAAGATCGGGCTCAACCTGGTGGTCATCGTCGCCCTGGCCGCCCTCTTCACCGGCATCTGGGCCCTGTACAACCGTCCGGTCAGCGTACCGGACTGGCCGGAACGCATCTCCGGCTTCTCCTTCTCGCCGTTCCGCCTCAACCAGAACCCGCAGAGCGGCCGCTACCCCAGCGCCGAACAGATGCGCACCGACCTGGAACTGGTCGCCCGACACACCCACAGCATCCGCACCTATTCGGTCCAGGGCGCGCTCGGCGACATCCCGGCGCTGGCCGAGGCGTTCGGCCTGCGCGTCAGCCTGGGCATCTGGCTCGGCCCGGACCTGGCCAGCAACGAGGCCGAGATCGCCCGCGCCATCCGCATCGCCAACGAGTCGCCGAGCGTGGTG…	ATGACCGCCATGCCCGAAGTACTTCGCGAAGATACGCTGAACATCCCCGACAGCCGTGGGCTGAATCTCTACACCTGCGATCCGGCCCTGGAGCGGCTGCTGGAGGTATACCTGCCGCCGGCGTTGCTCGCCGAATGGCGGCCGCTCCTCGAACGGCTCGGCGCCCGTGCCGGCGGCGAGCTGGACGTGCTGGCGCTGGCGGCGGACAAGAACCCGCCGGTGCTGGCGCCGCGCACGCGCCGCGGCGAGGATTTGCAGAGCATTCGCAAGCATCCGGACTACGTCGCCCTCGAACAGGTGGCCTATGCCGAACTTGGCCTGGCTTCCATGAGCCATCGCCCGGACGGCCCGCCGCCGCTGGTGAAGTATGCGCTCACCCACCTGTTCGTACAGGCCGAG…	ATGTCCGAATTCTTCATCAAGCGGCCGAACTTCGCCTGGGTGGTGGCCCTGTTCATCTCCCTGGCCGGCCTGCTGGTCATTTCCAAATTGCCGGTAGCGCAGTACCCCAATGTCGCGCCGCCACAGATCACCATCACCGCCACCTATCCCGGCGCCTCGGCGAAGGTGCTGGTGGACTCCGTCACCAGTGTGCTCGAGGAGTCGCTGAACGGCGCCAAGGGCCTGCTCTACTTCGAGTCGACCAACAACTCCAACGGCACCGCCGAGATCGTCGTCACCTTCGAGCCGGGCACCGATCCGGACCTGGCCCAGGTGGACGTGCAGAACCGCCTGAAGAAAGCCGAGGCGCGCATGCCGCAGGCGGTGCTGACCCAGGGCCTGCAGGTCGAGCAGACCAGC…	ATGAGCCAGCAGCAGATGCCCGTGGCCCTCGATCCGCTGGACTTCCCGTTGCACGGCAGCCGCCTGATCGAGGCCAGCGCCGGTACCGGCAAGACGTTCACCATCGCCCTGCTATACGTACGCCTGGTCCTCGACCATGGCGGCGAGAACGCTTTCGGCCGGCCGCTGAGCCCGCCGGAAATCCTCGTGGTGACCTTCACCGATGCGGCGACCCAGGAACTCCGCGAGCGTATCCGCAGCCGCCTGGGCGAAGCGGCGCGTTGTTTCGCCGAGCCGCAGGAGCGCCACGACGGCCTGCTGGTCGCGTTGCGCCAGCAGTATCCCGCCGAGCGCTGGCCGGGCTGCGCGCGCCTGCTGCGCCTGGCCGCGGAGTGGATGGACGAGGCCGCGGTATCGACC…	ATGAGGCGCGCCAGCCTGCATATGTTGCTCTGCCAGTTCGCCATGGCCCTGGGCCTGCTCCTGAGCCTGGGCAGCGAGGCCTGGGCCGCCAGGCCGGCTCCGCAGGCGGCCGTCGACCTGGAAGCGCCGGCCGCCCTGGCCGAGGACGCCAGCCTCGACCAGCTCAACGCGCAACTCGACCTGATCCGCCAGCGCGTCACCACTGACGCCAGCGACGACCTCCTCGCCGAGTTGCGCCAGAGCGCGCTGCAAGTCCAGCGCCAGGCCGACGCCCTGCTCGCGCTGCGGGTGGCCGACATCGAGCGGCTCGACGATCAGTTGAAAGTGATCGGCCCGCCGCAGCCCGACGAGGCGGAAAGCCTCGCCGCCCAGCGCCAGGCCCTGACCCGGCAGAAGAAC…	CTGCTGTTCGCCGCAGTGGTCATCGGCTTCCCCCAGCGCGCCGGCGAATGGCTGCTGGCCGCGCAGACCTGGGCCTCGCAGACCGTCGGCTGGTACTACCTGCTGGCGATGACGCTGTACCTGATCTTCGTGGTGGTCACCGCGCTTTCCGGCTACGGCAAGATCAAGCTCGGTGCCGACCACGACGAGCCGGAATTCAGCTACCTGTCCTGGGCCGGCATGCTGTTCGCCGCCGGCATCAGCATCACCCTGTTCTTCTTCTGCGTATCCGAACCGCTGACCCACTTCCTCCAGCCGCCGCAAGGCGAGGCCGGTACCCAGGAAGCCGCGCGGCAGGCCATGGAACTGCTGTTCCTGCACTGGGGCCTGCACGGCTGGGGCGTGTTCGCCCTGGTGGCG…	ATGGTCCAGGGCACCACCTCGGACGCCGGCAAGAGCACCCTGGTGACCGCGCTGTGCCGCTGGCTGGCCCGGCGCGGCGTCGCGGTGGTGCCGTTCAAGCCGCAGAACATGGCGCTGAACAGCGCGGTCACCGCCGACGGCGGCGAGATCGGCCGCGCCCAGGCGGTCCAGGCCCAGGCCTGTCGGCTGGCGCCGCACACCGACATGAACCCGGTGCTGCTCAAGCCGAACACCGACATCGGCGCCCAGGTGATCATCCATGGCCGCGCGGTGACCAGCATGGACGCCGCCGCCTACCACGACTACAAGCGCGTGGCGATGGAAGCGGTGCTGGCTTCCCATGGGCGGCTCGCCGCCGCCTACCGGGTGGTGATGGTGGAGGGCGCCGGCTCGCCGGCG…	ATGGCCAGCCTGTTCCTCGGTCGCAAGGAAATCGACGACGACCTGCTCGACGACATCGAGACGCGCCTGCTGACCGCCGACGTCGGCGTCGAGGCCACCACCCTGATCGTGCAGAACCTGACCAAGCGCGTGGCGCGCAAGGAGCTGGCCGACAGCGGCGCGCTGTACAAGGCGCTGCAGGAAGAGCTGGCCAGCCTGCTGCGCCCGGTGGAGCAGCCGTTGCAGGTCGACGTCGCGCGCGAGCCCTATGTGATCCTGGTGGTCGGGGTGAACGGCGTGGGCAAGACCACCACCATCGGCAAGCTGGCGAAGAAGCTGCAACTCGAGGGCAAGAAGGTCATGCTGGCCGCCGGCGACACCTTCCGCGCCGCCGCCGTGGAGCAGTTGCAGGTCTGGGGC…	TTGCGTATCGAGAACTTCGCGCCCATCGACAGCCAGGGTTTCCGTTTCCTGCTCCGGCCGGGGGATGAGCCTCTGCTCGCGGTCCTCGATCGAGCCCTGCCGCGTATCAATGGGCGCTACGGCGACGAACTGTTGCGCAGTTGGAGCGCCGGGCGGCGCCTGCGTTTCGACGAGCCCAGGGTGACGCTTGCGCCGGCGGAACAGCGTTGGCTCTCCACGCATCCGGTCGTGCCGGTGGTGATCAACCATTCCCTTGGCGCGCTCGGGCAACTGGATAGCGAGGGGCGGCTGAGCGGTATCGGGCGTGACTATCTGGACCTGATCGGCAAGCGCAGCGGCCTGCAGTTTTCCTTCAGCGGAGCCCGAAACTTCGTCGAGGCGAAACGTCGACTGGATGCG…	CGAGCCACCGCCCGCAGACGACTACTACGAAGTCGACATGGATACCCTGGCCTACCTGGATGCCGCGCCCGAGCCTGACGTGGTCGTGGTGGAGGAGCCGCTGCCGGCGGCGAAGCCGGCCACCGGCCTGGCCGCGGAGTGGCTGGAGCTGTTCCCGCGGCTCGGCCTCGGCGGCCTGACCGCCAGCATCGGTGCCAACTGTACGCTGGTAGCTGCCGACGGCGACCACTGGCATCTGCATCTCGATCCGGGCCAGAGCGCGCTGTTCAACGCCACCCAGCAGCGGCGGCTGAACGATGCGCTGAACCAGCACCTGGGGCGCACCCTCAAACTGGAGGTGACCCTGCAGAAGCCTGAGCAGGAGACCCCGGCCCAGGCAGCGGCACGCCGGCGTGCCGA…	ATGTCGCAGACGCCGTCCCTCGCCCAGCTCCAGCCCGCCGATGCCTTCCTGCGCCGCCACCTCGGCCCCGATCCTGCGGAACAGCAGGCCATGCTGGACTTCCTCGGAGTTTCCACTCGCGCCGAACTGATCGTGCAGACGGTGCCGCCGGCGATCCGCCTCAACCGGCCGCTGGAACTGCCCGCTGCGCTCGACGAACAGGCCGCCCTGGCGCGCCTGCGCGGCTACGCCGGGCTCAACCAGCGCTGGACCAGCCTGATCGGCATGGGCTACTACGGCACCGTGACGCCGTCGGTGATCCTCCGCAACGTGCTGGAGAATCCCGGCTGGTACACCGCCTATACGCCCTACCAGCCGGAAATCGCCCAGGGCCGCCTGGAAGCGCTGCTGAATTTCCAG…	GTGATTCTCGCCGACGAGCAGGAAGAGTTCGGCGGCAGCCTGCTGGACACCCGCGAGACCCTCGACGGCAAGCCCGCCGCCGAGTGGGTCGCGGACGCCGTGGCCGAGCTGCAAGGCCTGCCGGAAGTCATCCTGCTACCGCGCTCCACGGTCAACGGCTACCACGACCACAACTTCCTCACCATCCACGAGCGGCGCACCGACCACCTCGGCGAGGTCGCCCCGCTCGGCCAGGTCCGCCAGCGCGTGCACCGCGTACGCGCCAAGCGCGTGGTACTGGCCGCCGGCGCCCATGAGCGTCCGCTGGTCTACGGCAACAACGACCTGCCCGGCAACATGCTCGCCGGCGCGGTTTCCACCTATGTACGGCGCTACGGCGTGGCACCGGGCAAGAAACTG…	GTGCGCAGCTATCTCGAATGGCTGCTGGACAACCACTTCACCTTCCTCGGCTACGAGGAATTCAGCGTCGCCGACGAGGCCGACGGCGGGCGCATGGTCTACGACGAGAAATCCTTCCTCGGCCTGACCCGTCTGCTGCGCGCCGGCCTGAGCAAGGATGACCTGCACATCGAGGACTATGCCGTCGCCTACCTGCGCGAACCGGTCCTGCTGTCCTTCGCCAAGGCTGCCCATCCGAGCCGTGTGCACCGCCCGGCCTACCCGGACTACGTGTCGATCCGCGAGCTGGACGGCAAGGGCCGGGTGATCCGCGAGTGCCGCTTCATGGGCCTGTTCACCTCCTCGGTGTACAACGAGAGCGTCAACGACATCCCCTTCATCCGCGGCAAGGTCGCCGAA…	GTGTACGGCGAATATTCTCGGGAAAGCATTGTCTGCCTGCTCGCCATACTATTATCCGGCCATCACTACTTATATATAGACCTGAAACAACCGGCGGCCTGGAATGCAGAGTTGTGCCGGCAGGTCGACTGCCGCCTGATCCTCGACTGCTCGACCACGCCGACGCCCGCCAACGGTCTTCCCTGCGTCCCGGTCAGGCACCTGCCTGCCGCTCCAGCCTCGGTCGCCCGGCCATGCTTCGCGGCGGACCAGATCGCCTACATCAACTTCTCCTCGGGCACCACCGGCCGCCCGAAAGCCATCGCCTGCACCCACGCCGGCATTACCCGTCTGTGCCTGGGCCAGTCGTTCCTCGCGTTCGCTCCGCAGATGCGCTTCCTGGTGAACTCGCCGCTGTCC…	CTGCTGGAAGAAGGTGCGGACGAGGTATTCGAGGAAATCCTCGCCGCCGCTACGTCCTACTTCCAGACGCCCATCGCGCTCATTTCCATCCTCGACCATCAGCGCCAGTGGTTTCGCGCGAGCATCGGCCTCGATATCCGGCAGACGCCGCGACGGGATTCGTTCTGCGCCTATGCGATCCTGGGCAAGGGAGTATTCGAGGTGGCCGACGCCACCCTCGACCCGCGCTTCCGGGACAACCCCTATGTGCAAGGCGAACCGCGCATCCGCTTCTACGCCGGGGCTCCGCTGGCCACCGCGGAAGGTCTCAACCTCGGCAGCCTCTGCGTCATCGACCGGGAACCACGCGGGCCGCTGGCCGAGCGGGACGTCGCCATGCTCGAGCACTTCGCCCGCCTG…	ATGTCCCTGAGTGTCTTCGATCTGTTCAAGATCGGCATCGGGCCGTCCAGCTCCCACACCGTGGGGCCGATGCGTGCCGCCGCGCGCTTCGCCGAGGGGCTGAGGCGCGAGGGGTTGCTGGAGGCCACTGCCAGCGTCAAGGTCGAGCTGTACGGCTCGCTTGGCGCCACCGGCAAGGGCCACGGCAGCGACAAGGCGGTACTGCTCGGCCTGGAGGGCGAGCAGCCGGACACGGTGGATACCGCCGCGATTCCCGCTCGGCTCGATGCCATCCGTTCCAGCGGCGAGCTGCGCCTGCTCGGCGAGCGGCCGATCCGCTTCGTCGAGAAGGAACACCTTGCGCTGATCCGCAAGCCGCTGGCCTACCATCCCAATGGCATGATCTTCCGTGCCTTCGAC…	ATGAACAGAGTTTTCCTGACCCCGGCAGCCGTGGCGCTGTGCGGCGCGTCTTCCCTGAGTCTGGCCGAACCGGTCAGCCTTGCCGACCAGGTGGTGACCGCCACCCGTACCGCCCAGACCGCTTCCCAGAGCCTGGCGGCGGTGAGCGTCATCGACCGCGAGGATATCGAGCGCAGCCAGGCGCGCAGCGTGCCGGAGCTGTTGCGCCAGGTACCCGGCGTGTCGCTGGCGAACAACGGCGGTTTCGGCAAGAACACCACGCTGTTCCTGCGCGGCACCGAGTCCGACCATGTGCTGGTGCTGATCGACGGCATCAAGGTCGGCTCGGCCAGCGCCGGCCTCACCGCGTTCCAGGATTTGCCGGTGGAGCTGATCGAGCGCATCGAGGTGGTCCGCGGG…	GTGCGGGTGCTCAACTGGAGCTGGGGCATCCACCGCGTCGGCGCTCGCGACGTCGACGGCGACGAGGTGGATTCGCTGGTGCGCTCGGGGATCGCCATGAGCGGCTACGAGGAGTTGCTCGAGGAATTCTTCCTCTGGCTGCGCAAGGAGCATCCGGACGTGCTGGTGGTCAACTCCGCCGGCAACGGCTCGTCCTACTCCGGTACCGACGAATACCGCCTGCCGTCCTCCTTCGTTACCGAGCAGTTGCTGGTGGTGGGCGGCCACCAGCGCAGCGAGCGCCAAGGCCTGGCGGTGGACGACCCGGCCTACGCGGTCAAGCGCAGCACCTCGAACGTCGACATGCGGGTGGATGTCACCGCCGCCGCCTGTACCCATGCCTCGACCCTGGAGCGGGAC…	TTGCAGGCAGCTTGCGCGTTCGGCCCGCCCGGGCGGCTATTCCGCGCCTGCGACGAGCAAGGACGCGAGGCGTTGCTGCTGCTCGCGGCGGTCGATGCCGACGAAGCGTTCTGGCAGCGCGAATGGGCATTGCGGCGCTGCCGTGCGGAGAGCCTGCCGCGAGTATTGTCGTCGCTCCGGTTGCGTCGTCATGCCTTCCAGTTGTTCGCTCCGCCGCGCTGGCCGATGCGCAGCCTGCTGGATTGGGCGCCAGCGCACCTGCCGCTGGAACCGCAATGCGCGCTGGTCCTCCTGGAGCAACTTATCGATGCGGTTCGCGCCTTGCAGCGGCGCGGCGTACAGGGCTTGTGGCTGGCGCCGCGGCAGATCCTGCTGGACGAGGGCGGGCGCCTGCTGTTC…	ATGTTCAACCCGGCCAACCAGACCCACTTCAGCCTCAGCCTCGACGGCCTCCGTCACGACCTGCAGGTCCTCGCCTTCAACGGCCACGAAGGCATCAGCCGGCCCTACCGCTTCGAACTCGAACTGGTCAGCGAGCGCGCCGGCCTCGACCTCGAAGCGCTCATGCACCGGCCCGCCTTCCTCGCCTTCACCCCGCAGGGCCAGGGTGTCCACGGCCTGGTCTACGGCGCTGCCCAAGGCGATGCCGGCAAGCGCCTGACCCGCTATCGCCTCACCCTCGTGCCGCAACTGGCCTACCTCGCGCAGCGCAGCAACCAGCGGATCTTCCAGCACCTCACGGTGCCGCAGATCGTCGCCCTGATCCTCGAGGAGCACGGCATCCTCGCCGACGCCTACCGC…	GTGGCTCTCCATCGCCTGGCCTTTATCTTCCTGTGCCTGCCGCTCATGGCCAGCGCCGCCCCCTTCACCTCCCCCGGCGACCGCGACCTGATCCGCGACCGCCAGCAGCGCCTGCTGGACGAACAGCGCAAGCGCCTGGAGGAACTCCAGCAACTGCCCGGCAAGGGAGCGCCCGCCGCTGCGGATGCCTCCGGCGACGACGAGCGCTGCTTCGAGATCCGCCGCATCGAGCTGGAGGGCGCCGGGCACCTCGGCGAAAGCGCGCGTCGCCAACTGCTGGCGCCCTACCAGGGGCGCTGCCTGGGCGTCGGCCAGCTCAATGCGCTGCTCAAGGCCGTCACCGACCATTACCTGGATCGCGGCTACGTCACCACCCGCGCCTACCTGCCACAGCAGGAC…	ATGGGTGACCGGCACGACTACGTCGCTCTGGAATGGGTGAAAGGCGAGATCGCCGAAACCCTGAAACAGGCGCGCCAGGCGCTGGAAGCGTTCGTCGAGAACCCGCAGGACCCGACCCGCATGCGGTTCTGCCTGACCTACGTGCACCA---GGTGCAGGGCACCCTGCAGATGGTCGAGTTCTACGGCGCGGCCCTGCTCGCCGAGGAAATGGAGCAGTTGGTCCAGGCCTTGCTGGACGGTCGCGTGCCGAACCAGGGCGAGGCCCTGGAAGTGCTGATGCAGGCGATCCTGCAACTGCCGGTCTACCTCGACCGGATCCAGACCGCCCGGCGCGACCTGCCGATGGTGGTCCTGCCGCTGCTCAACGACCTGCGCGCCGCGCGCGGCGAGAAGCTG…
20	ATGACCTTCGACGCCGCGTTCCAGCAGCTCGGCGAGCGGATGGCCGGCGGGGCCCTGGCGGAAACGGCGCTGGCGCCGTTCACCCATCTGCTGATCGACGAGTTCCAGGATGTCTCGCCGCAGATCGTCCTCTGGCTACAGGCGTTGCACCGTCGCCTGGCAA---CCCAGGGCACCGCGCCGAGCCTGATGGCCATCGGCGACGACTGGCAGTCGATCTACGGCTGGCGCGGCAGTTCGCCGGAGCTGTTCATCGACTTCGACCGGCATTTCCCTTCGCGTGGGCGGGGACGCAAGAGCGCGCTGCTGGTGCTGGAAACCAACTACCGCTCCGTCGAACCGATCATTCGCGACGGCGAGAAGGTGCTGGCCGGGGTGCGTTTCAAGCAGGACAAGACC…	ATGCACCTGTTGCGCACCCAACCCGGCGGCTTCGTTCCCGACGACGGCATCGCCCACCTGGCCCAGACTCCCGCCGAGCTGGTGATCCTCTGCAGCGGCGATTCGCACCTCGCATTGCTGGCCGAGGCCGCCCGTGCGCTGCCGGACGACTACCCGAGCCTGCGCCTGGCCAACCCCATGCAGTTGCAGAACCACGCCTCGGTGGACCTCTACGTCGAGGAAGTGCTGCGGCACGCGCGGGTGATCCTGCTTTCGCTGCACGGCGGCATCGGCTACTGGCGCTACGGCGTGGAGCAACTGGTGGCGCTGGCCGAGCGCGGCGCGCTGCTGATCCCGGTGCCCGGCGACGACCGCCCCGACCCGGAGCTGAGCGCCCTTGGCAACCTGCCGGCGGAGCAG…	ATGTTCGAACGCATCATCCAATTCGCCATCGAGCAACGCTGGCTGGTCCTGCTGGCGGTGCTGGGGATGGCCGGGGTCGGCATTGGCAGCTACCAGAAGCTGTCCATCGACGCGGTCCCGGACATCACCAACGTCCAGGTGCAGATCAATACCGCCGCCCCCGGCTACTCGCCGCTGGAAGTGGAGCAGCGGATCACCTACCCGGTGGAGACCGTCATGGCCGGCCTGCCGGGTTTGCAGGAAACCCGTTCGCTGTCGCGGCCGGGGATTTCCCAGGTGACGGTGATCTTCGAGGAAGGCACCGACATCTACTTCGCCCGCCAGCAGGTCAACGAACGCCTGAGCACGGCGCGCGAGCAACTGCCGGAAGACATCTCGCCGACCCTCGGGCCGATCTCC…	ATGTCCTTCAACCTTTCCGCCTGGGCGTTGCAGAATCGCCAGATCGTCCTGTACCTGATGATCCTGCTTGGCGCGGTCGGCGCGCTGTCCTACAGCAAGCTGGGGCAGAGCGAAGACCCGCCGTTCACCTTCAAGGCCATGGTGGTGCAGACCAACTGGCCGGGCGCCAGCGCCGAAGAGGTGGCCCGGCAGGTCACCGAGCGTATCGAGAAGAAGCTGATGGAAACCGGCGACTACGATCGCATCGTGTCCTTCTCCCGCCCCGGCGTCTCGCAGGTGACCTTCATGGCCCGCGAGGACATCCATTCCAGCGAGATCCCCGAACTCTGGTACCAGATCCGCAAGAAGATCAGCGACATTCGCGCCACCTTGCCGCAAAGCATCCAGGGCCCGTTCTTC…	ATGCGCACCGAGCAACCGAAAGTCATCCACCTCAAGGACTATCAGGCGCCGGACTACCTGATCGACGAGACCCACCTGAAGTTCGAACTGTTCGAAGACCACAGCCTGGTACACGCCGAGTTGAAGCTGCGGCGCAACCCCGAGCGCGGCGCCGGCCTGCCGCCGCTGTTACTGCATGGCCAGCAACTGGAGCTGCTGGCGCTCGAACTGGACGGCCAGGCTCTCGGCGCGGACGACTACCAACTGGACGACGAGCAGCTCGGGGTGCAACCGCGGCAGGCCGAATTCGTCCTCAGGAGCACGGTGCGTATCCATCCGGAGAGCAACACCGCGCTGGAAGGCCTGTACAAGTCCGGCAAGATGTTCTGCACCCAGTGCGAGGCCGAGGGTTTCCGCAAG…	ATGACCGATAACCTGAACCTCGGCGCCATCGACCTGGGCACCGACGACGAATTCATCGCCCGCCATATCGGCCCGCGTGCCGCCGACACCCAGGCCATGCTCCAGCGCCTGGGCTACGACTCGCTGGACGCGCTGATCGGCAACGTGATCCCCGACAGCATCAAGGGCAGCAGCGTGCTCGACCTGCCGGCCGGCATGGGCGAGGCCGAGGCGCTGGCCAGCCTGAAGGCGATCGCCGCGCGCAATCGCGCGTTGCGTTCCTTCATCGGCCAGGGCTACTACAACTGCCACACCCCGGCACCGATCCTGCGCAACCTCCTGGAGAACCCGGCCTGGTACACCGCCTACACGCCGTACCAGCCGGAAATCTCCCAGGGCCGCCTGGAGGCGCTGCTGAAC…	GCAGGTTTCCCATGACGAGCTGGTCGCTCGCCTGTCCATGGTCGGCCTCGAGGTCGACGCCGACCTGCCGGTCGCCGGCGCCTTCAGCGGCGTGGTGGTCGGCGAGGTGCTCTCGACCGAACAGCATCCGGACGCCGACAAGCTGCGCGTCTGCCAGGTCAGCAACGGCAGCGAGACCTTCCAGGTCGTCTGCGGTGCGCCCAACGTACGCGCGGGCCTGAAGATTCCCTTCGCCATGATCGGCGCCGAACTGCCGGGCGACTTCAAGATCAAGAAAGCCAAGCTGCGCGGCGTCGAGTCCTTCGGCATGCTCTGCTCGGCCAAGGAATTGCAGATCAGCGAAGAGAACGCCGGTCTGCTCGAGCTGCCGGCCGACGCGCCGGTCGGCCAGGACGTCCG…	ATGAGCGAGAACAACACGTACGACTCTTCCAGCATCAAGGTGCTGAAGGGGCTGGATGCCGTACGCAAGCGCCCCGGCATGTACATCGGCGACACCGACGATGGCACCGGTCTGCACCACATGGTGTTCGAGGTGGTGGATAACTCCATCGACGAAGCGCTGGCCGGTTACTGCAGCGAAATCAGCATCACCATCCATACGGATGAGTCGATCACTGTCCGCGACAATGGACGCGGTATTCCGGTGGATATCCACAAGGAGGAAGGGGTTTCTGCGGCGGAAGTGATCATGACCGTCCTCCACGCCGGCGGCAAGTTCGACGACAACACCTACAAGGTGTCCGGCGGCTTGCACGGTGTGGGCGTCTCGGTGGTGAACGCGCTGTCCCATGAACTACGC…	ATGCTGATCCTGCGCGGCGCTCCCGCCCTTTCCGCTTTCCGCCACGGCAAACTGCTCGAGCAACTGACCCAGCACGTACCTGCCGTTACCGGGCTGTACGCTGAGTTCGCGCATTTCGCCGACGTCACCGGCGCGCTCACCGCCGACGAGGAGCAGGTGCTGGCGCGGCTGCTGAAATACGGCCCGAGCGTGCCGGTGCAGGAGCCCAGTGGCCGGCTGTTCCTGGTGGTCCCGCGCTTCGGCACCATCTCGCCGTGGTCGAGCAAGGCCTCCGACATCGCCCGCAACTGCGGCCTGGCGAAGATCGACCGGCTGGAGCGCGGCATTGCCTACTATGTGCAGGGCGAACTGTCCGAGAGCGATGCCCAACAGGTCGCCGCCCGCCTGCATGACCGCATG…	ATGAGTGGCCGCTCCGCTGGTTTCGCCCTGCCCAGCCGCGACGAGTGGCGGCGCGCGCTGGCCGAGTGGGCGCGCAGCGACGGGGCGACCTGGATCTACGTGTTCAAGGTGCTCTGCGCGGCCTTCCTGACCCTCTGGCTGGCGATGCGCCTGGAGTTGCCGCAACCGAGCACGGCGACCATCACCGTGTTCATCGTCATGCAGCCGCAGAGCGGCCAGGTGTTCGCCAAGAGCTTCTACCGCATCCTCGGCACCCTGGTCGGCCTCAGCGTGATGGTCACCCTGATCGCCCTGTTCGCCCAGGAGCGGGTGCTGTTCCTGCTCAGCTCGGCGATCTGGATCGGTCTCTGCACCGCCGGGGCCGCCCGCTACCGTGACTTCCGCTCCTACGCCTGCGTG…	ATGAGCGAATCCCTCGATCTGAGCCTGGAAGGGGTCGAACGCCGGTCGTTGGCCGAGTTCACCGAGCAGGCCTATCTGAACTATTCCATGTACGTGATCATGGACCGCGCCCTGCCGCATATCGGCGACGGCCTGAAACCGGTGCAGCGACGCATCGTCTACGCCATGAGCGAACTGGGGCTGGATGCCGATTCCAAGCACAAGAAGTCGGCGCGCACCGTCGGCGACGTGCTCGGCAAGTTCCACCCGCACGGCGACTCGGCCTGCTACGAGGCCATGGTGCTGATGGCGCAGCCGTTCTCCTATCGCTATCCGCTGGTGGACGGCCAGGGCAACTGGGGGGCGCCGGACGATCCCAAGTCCTTCGCCGCCATGCGTTATACCGAGGCGCGCCTGTCG…	ATGTCTTCACGCAAGATCGGGCTCAACCTGGTGGTCATCGTCGCCCTGGCCGCCCTCTTCACCGGCATCTGGGCCCTGTACAACCGTCCGGTCAGCGTACCGGACTGGCCGGAACGCATCTCCGGCTTCTCCTTCTCGCCGTTCCGCCTCAACCAGAATCCGCAGAGCGGCCGCTACCCCAGCGCCGAACAGATGCGCGCCGACCTGGAACTGGTCGCCCGGCACACCCACAGCATCCGCACCTATTCGGTCCAGGGCGCGCTCGGCGACATCCCGGCGCTGGCCGAGGCGTTCGGCCTGCGCGTCAGCCTGGGCATCTGGCTCGGCCCGGACCTGGCCGGCAACGAGGCCGAGATCGCCCGCGCCATCCGCATCGCCAACGAGTCGCCGAGCGTGGTG…	ATGACCGCCATGCCCGAAGTACTTCGCGAAGATACGCTGAACATCCCCGACAGCCGTGGGCTGAATCTCTACACCTGCGATCCGGCCCTGGAGCGGCTGCTGGAGGTATACCTGCCGCCGGCGTTGCTCGCCGAATGGCGGCCGCTCCTCGAACGGCTCGGCGCCCGTGCCGGCGGCGAGCTGGACGTGCTGGCGCTGGCGGCGGACAAGAACCCGCCGGTGCTGGCGCCGCGCACCCGCCGCGGCGAGGATTTGCAGAGCATTCGCAAGCATCCGGACTACGTCGCCCTCGAACGGGTGGCCTATGCCGAACTCGGCCTGGCTTCCATGAGCCATCGCCCGGACGGCCCGCCGCCGCTGGTGAAGTATGCGCTCACCCACCTGTTCGTACAGGCCGAG…	ATGTCCGAATTCTTCATCAAGCGGCCGAACTTCGCCTGGGTGGTGGCCCTGTTCATCTCCCTGGCCGGCCTGCTGGTCATTTCCAAATTGCCGGTAGCGCAGTACCCCAATGTCGCGCCGCCACAGATCACCATCACCGCCACCTATCCCGGCGCCTCGGCGAAGGTGCTGGTGGACTCCGTCACCAGTGTGCTCGAGGAGTCGCTGAACGGCGCCAAGGGCCTGCTCTACTTCGAGTCGACCAACAACTCCAACGGCACCGCCGAGATCGTCGTCACCTTCGAGCCGGGCACCGATCCGGACCTGGCCCAGGTGGACGTGCAGAACCGCCTGAAGAAAGCCGAGGCGCGCATGCCGCAGGCGGTGCTGACCCAGGGCCTGCAGGTCGAGCAGACCAGC…	ATGAGCCAGCAGCAGATGCCCGTGGCCCTCGATCCGCTGGATTTCCCGTTGCACGGCAGCCGCCTGATCGAGGCCAGCGCCGGTACCGGCAAGACGTTCACCATCGCCCTGCTATACGTACGCCTGGTCCTCGACCATGGCGGCGAGAACGCTTTCGGCCGGCCGCTGAGCCCGCCGGAAATCCTCGTGGTGACCTTCACCGATGCGGCGACCCAGGAACTCCGCGAGCGTATCCGCAGCCGCCTGGGCGAAGCGGCGCGTTGTTTCTCCGAGCCGCAGGAGCGCCACGACGGCCTGCTGGTCGCGTTGCGCCAGCAGTATCCCGCCGAGCGCTGGCCGGGCTGCGCGCGCCTGCTGCGCCTGGCCGCGGAGTGGATGGACGAGGCCGCGGTATCGACC…	ATGAGGCGCGCCAGCCTGCATATGTTGCTCTGCCAGTTCGCCATGGCCCTGGGCCTGCTCCTGAGCCTGGGCAGCGAGGCCTGGGCCGCCAGGCCGACTCCGCAGGCGGCCGTCGACCTGGAAGCGCCGGCCGCCCTGGCCGAGGACGCCAGCCTCGACCAGCTCAACGCGCAACTCGACCTGATCCGCCAGCGCGTCACCGCCGACGCCAGCGACGACCTCCTCGCCGAGTTGCGCCAGAGCGCGCTGCAAGTCCAGCGCCAGGCCGACGCCCTGCTCGCGCTGCGGGTGGCCGACATCGAGCGGCTCGACGATCAGTTGAAAGTGATCGGCCCGCCGCAGCCCGACGAGGCGGAAAGCCTCGCCGCCCAGCGCCAGGCCCTGACCCGGCAGAAGAAC…	CTGCTGTTCGCCGCAGTGGTCATCGGCTTCCCCCAGCGCGCCGGCGAATGGCTGCTGGCCGCGCAGACCTGGGCCTCGCAGACCGTCGGTTGGTACTACCTGCTGGCGATGACGCTGTACCTGATCTTCGTGGTGGTCACCGCGCTTTCCGGCTACGGCAAGATCAAGCTCGGTGCCGACCACGACGAGCCGGAATTCAGCTACCTGTCCTGGGCCGGCATGCTGTTCGCCGCCGGCATCAGCATCACCCTGTTCTTCTTCTGCGTATCCGAGCCGTTGACCCACTTCCTCCAGCCGCCGCAAGGCGAGGCCGGTACCCAGGAAGCCGCGCGGCAGGCCATGGAACTGCTGTTCCTGCACTGGGGCCTGCACGGCTGGGGCGTATTCGCCCTGGTGGCG…	ATGGTCCAGGGCACCACCTCGGACGCCGGCAAGAGCACCCTGGTGACCGCGCTGTGCCGCTGGCTGGCCCGGCGCGGCGTCGCGGTGGTGCCGTTCAAGCCGCAGAACATGGCGCTGAACAGCGCGGTCACCGCCGACGGCGGCGAGATCGGCCGCGCCCAGGCGGTCCAGGCCCAGGCCTGTCGGCTGGCGCCGCACACCGACATGAACCCGGTGCTGCTCAAGCCGAACACCGACATCGGCGCCCAGGTGATCATCCATGGCCGCGCGGTGACCAGCATGGACGCCGCCGCCTACCACGACTACAAGCGCGTGGCGATGGAAGCGGTGCTGGCTTCCCATGGGCGGCTCGCCGCCGCCTACCGGGTGGTGATGGTGGAGGGCGCCGGCTCGCCGGCG…	ATGGCCAGCCTGTTCCTCGGCCGCAAGGAAATCGACGACGACCTGCTCGACGACATCGAGACGCGCCTGCTGACCGCCGACGTCGGCGTCGAGGCCACCACCCTGATCGTGCAGAACCTGACCAAGCGCGTGGCGCGCAAGGAGCTGGCCGACAGCGGCGCGCTGTACAAGGCGCTGCAGGAAGAGCTGGCCAGCCTGCTGCGCCCGGTGGAGCAGCCGTTGCAGGTCGACGTCGCGCGCGAGCCCTATGTGATCCTGGTGGTCGGGGTGAACGGCGTGGGCAAGACCACCACCATCGGCAAGCTGGCGAAGAAGCTGCAACTCGAGGGCAAGAAGGTCATGCTGGCCGCCGGCGACACCTTCCGCGCCGCCGCCGTGGAGCAGTTGCAGGTCTGGGGC…	TTGCGCATCGAGAACTTCGCACCCATCGACAGCCAGGGTTTCCGTTTCCTGCTCCGGCCAGGTGACGAACCTCTGCTCGCGCTCATCGATCGCGCCCTGCCGCATATTAGCGGGCGCTACGGCGACGAACTGTTGCGCAGCTGGAGCGCCGGGCGGCGCCTGCGCTTCGACGAGCCCCGGGTGACGCTGTCGCCGGCGGAGCAGCGTTGGCTCTCCGCGCACCCGGTCGTGCCGGTGGTGATCAACCATTCCCTTGGCGCGCTCGGGCAACTGGATAACGAGGGGAGGCTGAGTGGTATCGGGCGTGACTATCTGGACCTGATCGGCAAGCGCAGTGGCCTGCGGTTTTCCTTCACTGGAGCACGCAACTTCGTCGAGACGAAAAGCCGACTGGATGCG…	CGAGCCACCGCCCGCAGACGACTACTACGAAGTCGACATGGATACCCTGGCCTACCTGGATGCCGCGCCCGAGCCTGACGTGGTCGTGGTGGAGGAGCCGCTGCCGGCGGCGAAGCCGGCCACCGGCCTGGCCGCGGAGTGGCTGGAGCTGTTCCCGCGGCTCGGCCTCGGCGGCCTGACCGCCAGCATCGGTGCCAACTGTACGCTGGTAGCTGCCGACGGCGACCACTGGCATCTGCATCTCGATCCGGGCCAGAGCGCGCTGTTCAACGCCACCCAGCAGCGGCGGCTGAACGATGCGCTGAACCAGCACCTGGGGCGCACCCTCAAACTGGAGGTGACCCTGCAGAAGCCTGAGCAGGAGACCCCGGCCCAGGCAGCGGCACGCCGGCGTGCCGA…	ATGTCGCAGACGCCGTCCCTCGCCCAGCTCCAGCCCGCCGATGCCTTCCTGCGCCGCCACCTCGGCCCCGATCCGGCGGAACAGCAGGCCATGCTGGACTTCCTCGGAGTTTCCACTCGCGCCGAACTGATCGTGCAGACGGTGCCGCCGGCGATCCGCCTCAACCGGCCGCTGGAACTGCCCGCCGCGCTCGACGAACAGGCCGCCCTGGCGCGCCTGCGCGGCTACGCCGGGCTCAACCAGCGCTGGACCAGCCTGATCGGCATGGGCTACTACGGCACAGTGACGCCGCCGGTGATCCTCCGCAACGTGCTGGAGAATCCCGGCTGGTACACCGCCTATACGCCCTACCAGCCGGAAATCGCCCAGGGCCGCCTGGAAGCGCTGCTGAATTTCCAG…	GTGATTCTCGCCGACGAGCAGGAAGAGTTCGGCGGCAGCCTGCTGGACACCCGCGAGACCCTCGACGGCAAGCCCGCCGCCGAGTGGGTCGCGGACGCCGTGGCCGAGCTGCAAGGCCTGCCGGAAGTCATCCTGCTACCGCGCTCCACGGTCAACGGCTACCACGACCACAACTTCCTCACCATCCACGAGCGGCGCACCGACCACCTCGGCGAGGTCGCCCCGCTCGGCCAGGTCCGCCAGCGCGTGCACCGCGTACGCGCCAAGCGCGTGGTACTGGCCGCCGGCGCCCATGAGCGGCCGCTGGTCTACGGCAACAACGACCTGCCCGGCAACATGCTCGCCGGCGCGGTTTCCACCTATGTACGGCGCTACGGCGTGGCACCGGGCAAGAAACTG…	GTGCGCAGCTATCTCGAATGGCTGCTGGACAACCACTTCACCTTCCTCGGCTACGAGGAATTCAGCGTCGCCGACGAGGCCGACGGCGGGCGCATGGTCTACGACGAGAAATCCTTCCTCGGCCTGACCCGTCTGCTGCGCGCCGGCCTGAGCAAGGATGACCTGCACATCGAGGACTATGCCGTCGCCTACCTGCGCGAACCGGTCCTGCTGTCCTTCGCCAAGGCTGCCCATCCGAGCCGCGTGCACCGCCCGGCCTACCCGGACTACGTGTCGATCCGCGAGCTGGACGGCAAGGGCCGGGTGATCCGCGAGTGCCGCTTCATGGGCCTGTTCACCTCCTCGGTGTACAACGAGAGCGTCAACGACATTCCCTTCATCCGCGGCAAGGTCGCCGAA…	GTGTACGGCGAATATTCTCGGGAAAGCATTACCTGCCTGCTCGCCATACTGTTATCCGGCCATCACTACTTATATATAGACCTGAAACAACCGGCGGCCTGGAATGCAGAGTTGTGCCGGCAGGTCGACTGCCGCCTGATCCTCGACTGCTCGACCACGCCGACGCCCGCCAACGGTCTTCCCTGCGTCCCGGTCAGGCACCTGCCTGCCGCTCCAGCCTCGGTCGCCCGGCCATGCTTCGCGGCGGACCAGATCGCCTACATCAACTTCTCCTCGGGCACCACCGGCCGCCCGAAAGCCATCGCCTGCACCCACGCCGGCATTACCCGCCTGTGCCTGGGCCAGTCGTTCCTCGCGTTCGCTCCGCAGATGCGCTTCCTGGTGAACTCGCCGCTGTCC…	TTGCTGGAAGAAGGTGCGGACGAGGTATTCGAGGAAATCCTCGCCGCCGCTACGTCCTACTTCCAGACGCCCATCGCGCTCATTTCCATCCTCGACCACCAGCGCCAGTGGTTTCGCGCGAGCATCGGCCTCGATACCCGGCAGACGCCGCGACGGGATTCGTTCTGCGCCTACGCGATCCTGGGCAAGGGAGTCTTCGAGGTGGCCGACGCCACCCTCGACCCGCGCTTCCGGGACAATCCCTATGTGCAAGGCGAACCGCGCATCCGCTTCTACGCCGGGGCTCCGCTGGCCACCGCGGAGGGTCTCAACCTCGGCAGCCTCTGCGTCATCGACCGGGAACCACGCGGGCCGCTGTCCGAGCGCGACATCGCCATGCTCGAGCATTTCGCCCGCCTG…	ATGTCCCTGAGTGTCTTCGATCTGTTCAAGATCGGCATCGGGCCGTCCAGCTCCCACACCGTGGGGCCGATGCGTGCCGCCGCGCGCTTCGCCGAGGGGCTGAGGCGCGAGGGGTTGCTGGAGGCCACTGCCAGCGTCAAGGTCGAGCTGTACGGCTCGCTCGGCGCCACCGGCAAGGGCCACGGCAGCGACAAGGCGGTACTGCTCGGCCTGGAGGGCGAGCAGCCGGACACGGTGGATACCGCCGCGATTCCCGCTCGGCTCGATGCCATCCGTTCCAGCGGCGAGCTGCGCCTGCTCGGCGAGCGGCCGATCCGCTTCGTCGAGAAGGAACACCTTGCGCTGATCCGCAAGCCGCTGGCCTACCATCCCAATGGCATGATCTTCCGTGCCTTCGAC…	ATGAACAGAGTTTTCCTGACCCCGGCAGCCGTGGCGCTGTGCGGCGCGTCTTCCCTGAGCCTGGCCGAACCGGTCAGCCTTGCCGACCAGGTGGTGACCGCCACCCGTACCGCCCAGACCGCTTCCCAGAGCCTGGCGGCGGTGAGCGTCATCGACCGCGAGGATATCGAGCGCAGCCAGGCGCGCAGCGTGCCGGAGCTGTTGCGCCAGGTACCCGGCGTGTCGCTGGCGAACAACGGCGGTTTCGGCAAGAACACCACGCTGTTCCTGCGCGGCACCGAGTCCGACCATGTGCTGGTGCTGATCGACGGCATCAAGGTCGGCTCGGCCAGCGCTGGCCTCACCGCGTTCCAGGACTTGCCGGTGGAGCTGATCGAGCGCATCGAGGTGGTCCGCGGG…	GTGCGGGTGCTCAACTGGAGCTGGGGCATCCACCGCGTCGGCGCTCGCGACGTCGACGGCGACGAGGTGGATTCGCTGGTGCGCTCGGGGATCGCCATGAGCGGCTACGAGGAGTTGCTCGAGGAATTCTTCCTCTGGCTGCGCAAGGAGCATCCGGACGTGCTGGTGGTCAACTCCGCCGGCAACGGCTCGTCCTACTCCGGTACCGACGAATACCGCCTGCCGTCCTCCTTCGTCACCGAGCAGTTGCTGGTGGTGGGCGGCCACCAGCGCAGCGAGCGCCAAGGCCTGGCGGTGGACGACCCGGCCTACGCGGTCAAGCGCAGCACCTCGAACGTCGACATGCGGGTGGATGTCACCGCCGCCGCCTGTACCCATGCCTCGACCCTGGAGCGGGAC…	TTGCAGGCGGCTTGCGCGTTCGGCCCGCCCGGGCGGCTGTTCCGCGCCTGCGACGAGCAAGGACGCGAGGCGTTGCTGCTGCTCGCGGCGGCCGATGCCGACGAAGCGTTCTGGCAGCGCGAATGGGCACTGCGGCGCTGCCGTGCGGAGAGCCTGCCGCGAGTATTGTCGTCGCTCCGGTTGCGTCGTCATGCCTTCCAGTTGTTCGCTCCGCCGCGCTGGCCGATGCGCAGCCTGCTGGATTGGGCGCCAGCGCACCTGCCGCTGGAACCGCAATGCGCGCTGGTCCTCCTGGAGCAACTTATCGATGCGGTTCGCGCCTTGCAGCGGCGCGGTGTACAGGGCTTGTGGCTGGCGCCGCGGCAGATCCTGCTGGACGAGGGCGGGCGCCTGCTGTTC…	ATGTTCAACCCGGCCAACCAGACCCACTTCAGCCTCACCCTCGACGGCCTCCGCCACGACCTGCAGGTCCTCGCCTTCAACGGCCACGAAGGCATCAGTCGCCCCTACCGTTTCGAACTCGAACTGGTCGGAGAGCGCGCCGGCCTCGACCTCGAAACGTTCCTCCACCGGCCCGCCTTCCTCTCCTTCACCCCGCAGGGCCAGGGTGTCCACGGCCTGGTCTACGGCGCTGCCCAGGGCGATGCCGGCAAGCGCCTGACCCGCTATCGCCTCACCCTCGTCCCGCACCTGGCCTACCTCGCCCAGCGCAACAACCAGCGGATCTTCCAGCACCTCACGGTGCCGCAGATCGTCGCCCTGATCCTCGAGGAGCACGGCATCCTCGCCGACGCCTACCGC…	GTGGCTCTCCATCGCCTGGCCTTTATCTTCCTGTGCCTGCCGCTCATGGCCAGCGCCGCCCCCTTCACCTCCCCCGGCGACCGCGACCTGATCCGCGACCGCCAGCAGCGCCTGCTGGACGAACAGCGCAAGCGCCTGGAGGAACTCCAGCAACTGCCCGGCAAGGGAGCGCCCGCCGCTGCGGATGCCTCCGGCGACGACGAGCGCTGCTTCGAGATCCGCCGCATCGAGCTGGAGGGCGCCGGGCACCTCGGCGAAAGCGCGCGTCGCCAACTGCTGGCGCCCTACCAGGGGCGCTGCCTGGGCGTCGGCCAGCTCAATGCGCTGCTCAAGGCCGTCACCGACCATTACCTGGATCGCGGCTACGTCACCACCCGCGCCTACCTGCCACAGCAGGAC…	ATGGGTGACCGGCACGACTACGTCGCTCTGGAGTGGGTGAAAGGCGAGATCGCCGAAACCCTGAAACAGGCGCGCCAGGCGCTGGAAGCGTTCGTCGAGAACCCGCAGGACCCGACCCGCATGCGGTTCTGCCTGACCTACGTGCACCA---GGTGCAGGGCACCCTGCAGATGGTCGAGTTCTACGGCGCGGCCCTGCTCGCCGAGGAAATGGAGCAATTGGTCCAGGCCTTGCTGGACGGTCGCGTGCCGAACCAGGGCGAGGCCCTGGAAGTGCTGATGCAGGCGATCCTGCAACTGCCGGTCTACCTCGACCGGATCCAGACCGCCCGGCGCGACCTGCCGATGGTGGTCCTGCCGCTGCTCAACGACCTGCGCGCCGCGCGCGGCGAGAAGCTG…
21	ATGACCTTCGACGCCGCGTTCCAGCAGCTCGGCGAGCGGATGGCCGGCGGGGCTCTGGCGGAAACGGCATTGGCGCCGTTCACCCATCTGCTGATCGACGAGTTCCAGGATGTCTCGCCGCAGATCGTCCTCTGGCTACAGGCGTTGCACCGTCGCCTGGCAA---CCCAGGGCACCGCGCCGAGCCTGATGGCCATCGGCGACGACTGGCAGTCGATCTACGGCTGGCGCGGCAGTTCGCCGGAGCTGTTCATCGACTTCGACCGGCACTTCCCCTCGCGTGGGCGGGGACGCAAGAGCGCGCTGCTGGTGCTGGAAACCAACTACCGCTCCGTCGAACCGATCATTCGCGACGGCGAGAAGGTGCTGGCCGGGGTGCGTTTCAAGCAGGACAAGACC…	ATGCACCTGTTGCGCACCCAACCTGGCGGCTTCGTTCCCGACGACGGCATCGCCCACCTGGCCCAGACTCCCGCCGAGCTGGTGATCCTCTGCAGCGGCGATTCGCACCTGGCATTGCTGGCCGAGGCCGCCCGTGCGCTGCCGGACGACTACCCGAGCCTGCGCCTGGCCAACCCCATGCAGTTGCAGAACCACGCCTCGGTGGACCTCTACGTCGACGAAGTGCTGCGGCACGCGCGGGTGATCCTGCTTTCGCTGCACGGCGGCATCGGCTACTGGCGCTACGGCGTGGAGCAACTGGTGGCGCTGGCCGAGCGCGGCGCGCTGCTGATCCCGGTGCCCGGCGACGACCGCCCCGACCCGGAGCTGAGCGCCCTCGGCAACCTGCCGGCGGAGCAG…	ATGTTCGAACGCATCATCCAATTCGCCATCGAGCAACGCTGGCTGGTCCTGCTGGCGGTGCTGGGGATGGCCGGGGTCGGCATCGGCAGCTACCAGAAGCTGTCCATCGACGCGGTCCCGGACATCACCAACGTCCAGGTGCAGATCAATACCGCCGCCCCCGGCTACTCGCCGCTGGAAGTGGAGCAGCGGATCACCTACCCGGTGGAGACCGTCATGGCCGGCCTGCCGGGTTTGCAGGAAACCCGTTCGCTGTCGCGGCCGGGGATTTCCCAGGTGACGGTGATCTTCGAGGAGGGCACCGATATCTACTTCGCCCGCCAGCAGGTCAACGAACGCCTGAGCACGGCGCGCGAGCAACTGCCGGAAGACATCTCGCCGACCCTCGGGCCGATCTCC…	ATGTCCTTCAACCTTTCCGCCTGGGCGTTGCAGAATCGCCAGATCGTCCTGTACCTGATGATCCTGCTTGGCGCGGTTGGCGCGCTGTCCTACAGCAAGCTGGGGCAGAGCGAAGACCCGCCGTTCACCTTCAAGGCCATGGTGGTGCAGACCAACTGGCCGGGTGCCAGCGCCGAAGAGGTGGCCCGGCAGGTCACCGAGCGTATCGAGAAGAAGCTGATGGAAACCGGCGACTACGATCGCATCGTGTCCTTCTCCCGCCCCGGCGTCTCGCAGGTGACCTTCATGGCCCGCGAGGACATCCATTCCAGCGAGATCCCCGAACTCTGGTACCAGATCCGCAAGAAGATCAGCGACATTCGCGCCACCTTGCCGCAAAGCATCCAGGGCCCGTTCTTC…	ATGCGCACCGAGCAACCGAAAGTCATCCACCTCAAGGACTATCAGGCGCCGGACTACCTGATCGACGAGACCCACCTGAAGTTCGAACTGTTCGAAGACCACAGCCTGGTACACGCCGAGTTGAAGCTGCGGCGCAACCCCGAGCGCGGCGCCGGCCTGCCGCCGCTGTTGCTGCATGGCCAGCAACTGGAGCTGCTGGCGCTCGAACTGGACGGCCAGGCGCTCGGCGCGGACGACTACCAACTGGACGACGAGCAGCTCGGGGTGCAACCGCGGCAGGCCGAATTCGTCCTCAGGAGCACGGTGCGTATCCATCCGGAGAGCAACACCGCGCTGGAAGGCCTGTACAAGTCCGGCAAGATGTTCTGCACCCAGTGCGAGGCCGAGGGTTTCCGCAAG…	ATGACCGATAACCTGAACCTCGGCGCCATCGACCTGGGCACCGACGACGAATTCATCGCCCGCCATATCGGCCCGCGTGCCGCCGACACCCAGGCCATGCTCCAGCGCCTGGGCTACGACTCGCTGGACACGCTGATCGGCAACGTGATCCCGGACAGCATCAAGGGCAGCAGCGTGCTCGACCTGCCGGCCGGCATGGGCGAGGCCGAGGCGCTGGCCAGCCTGAAGGCCATCGCCGCGCGCAATCGCGCGTTGCGTTCCTTCATCGGCCAGGGCTACTACAACTGCCACACCCCGGCGCCGATCCTGCGCAACCTCCTGGAGAACCCGGCCTGGTACACCGCCTACACGCCGTACCAGCCGGAAATCTCCCAGGGCCGCCTGGAGGCGCTGCTGAAC…	GCAGGTTTCCCATGACGAGCTGGTCGCTCGCCTGTCCATGGTCGGCCTCGAGGTCGACGCCGACCTGCCGGTCGCCGGCGCCTTCAGCGGCGTGGTGGTCGGCGAGGTGCTCTCGACCGAACAGCATCCGGACGCCGACAAGCTGCGCGTCTGCCAGGTCAGCAACGGCAGCGAGACCTTCCAGGTCGTCTGCGGCGCGCCCAACGTGCGCGCGGGCCTGAAGATTCCCTTCGCCATGATCGGCGCCGAACTGCCGGGCGACTTCAAGATCAAGAAAGCCAAGCTGCGTGGCGTCGAGTCCTTCGGCATGCTCTGCTCGGCCAAGGAATTGCAGATCAGCGAAGAGAACGCCGGTCTGCTCGAGCTGCCGGCCGACGCGCCGGTCGGCCAGGACGTCCG…	ATGAGCGAGAACAACACGTACGACTCTTCCAGCATCAAGGTGCTGAAGGGGCTGGATGCCGTACGCAAGCGCCCCGGCATGTACATCGGCGACACCGACGATGGCACCGGTCTGCACCACATGGTGTTCGAGGTGGTGGATAACTCCATCGACGAAGCGCTGGCCGGTTACTGCAGCGAAATCAGCATCACCATCCATACGGATGAGTCGATCACTGTCCGCGACAATGGACGCGGTATTCCGGTGGATATCCACAAGGAAGAAGGGGTTTCTGCGGCGGAAGTAATCATGACCGTCCTCCACGCCGGCGGCAAGTTCGACGACAACACCTACAAGGTGTCCGGCGGCTTGCACGGTGTGGGCGTCTCGGTGGTGAACGCGCTGTCCCATGAACTACGC…	ATGCTGATCCTGCGCGGCGCTCCCGCCCTTTCCGCTTTCCGCCACGGCAAACTGCTCGAGCAACTGACCCAGCACGTACCTGCCGTTACCGGGCTGTACGCTGAGTTCGCGCATTTCGCCGACGTCACCGGCGCGCTCACCGCCGACGAGGAGCAGGTGCTGGCGCGGCTGCTGAAATACGGCCCGAGCGTGCCGGTGCAGGAGCCCAGCGGACGGCTGTTCCTGGTGGTGCCGCGCTTCGGCACCATCTCGCCGTGGTCGAGCAAGGCCTCCGACATCGCCCGCAACTGCGGCCTGGCGAAGATCGACCGGCTGGAGCGCGGCATTGCCTACTATGTGCAGGGCGAACTGTCCGAGAGCGACGCCCAGCAGGTCGCCGCCCGCCTGCATGACCGCATG…	ATGAGTGGCCGCTCCGCTGGTTTCGCCCTGCCCAGCCGCGACGAGTGGCGGCGCGCGCTGGCCGAGTGGGCGCGCAGCGACGGGGCGACCTGGATCTACGTGTTCAAGGTGCTCTGCGCGGCCTTCCTGACCCTCTGGCTGGCGATGCGCCTGGAATTGCCGCAGCCGAGCACGGCGACCATCACCGTGTTCATCGTCATGCAGCCGCAGAGCGGCCAGGTGTTCGCCAAGAGCTTCTACCGCATCCTCGGCACCCTGGTCGGCCTCAGCGTGATGGTCACCCTGATCGCCCTGTTCGCCCAGGAGCGAGTGCTGTTCCTGCTCAGCTCGGCGATCTGGATCGGCCTCTGCACCGCCGGGGCCGCCCGCTACCGTGACTTCCGCTCCTACGCCTGCGTG…	ATGAGCGAATCCCTCGATCTGAGCCTGGAAGGGGTCGAACGCCGGTCGTTGGCCGAGTTCACCGAGCAGGCCTATCTGAACTATTCCATGTACGTGATCATGGACCGCGCCCTGCCGCATATCGGCGACGGCCTGAAACCGGTGCAGCGACGCATCGTCTACGCCATGAGCGAACTGGGGCTGGATGCCGATTCCAAGCACAAGAAGTCGGCGCGCACCGTCGGCGACGTGCTCGGCAAGTTCCACCCGCACGGCGACTCGGCCTGCTACGAGGCCATGGTGCTGATGGCGCAGCCGTTCTCCTATCGCTATCCGCTGGTGGACGGCCAGGGCAACTGGGGGGCGCCGGACGATCCCAAGTCCTTCGCCGCCATGCGTTATACCGAGGCGCGCCTGTCG…	ATGTCTTCACGCAAGATCGGGCTCAACCTGGTGGTCATCGTCGCCCTGGCCGCCCTCTTCACCGGCATCTGGGCCCTGTACAACCGTCCGGTCAGCGTACCGGACTGGCCGGAACGCATCTCCGGCTTCTCCTTCTCGCCGTTCCGCCTCAACCAGAACCCGCAGAGCGGCCGCTACCCCAGCGCCGAACAGATGCGCGCCGACCTGGAACTGGTCGCCCGGCACACCCACAGCATCCGCACCTATTCGGTCCAGGGCGCGCTCGGCGACATCCCGGCGCTGGCCGAGGCGTTCGGCCTGCGCGTCAGCCTGGGCATCTGGCTCGGCCCGGACCTGGCCGGCAACGAGGCCGAGATCGCCCGCGCCATCCGCATCGCCAACGAGTCGCCGAGCGTGGTG…	ATGACCGCCATGCCCGAAGTACTTCGCGAAGATACGCTGAACATCCCCGACAGCCGTGGGCTGAATCTCTACACCTGCGATCCGGCCCTGGAGCGGCTGCTGGAGGTATACCTGCCGCCGGCGTTGCTCGCCGAATGGCGGCCGCTCCTCGAACGGCTCGGCGCCCGTGCCGGCGGCGAGCTGGACGTGCTGGCGCTGGCGGCGGACAAGAACCCGCCGGTGCTGGCGCCGCGCACCCGCCGCGGCGAGGATTTGCAGAGCATTCGCAAGCATCCGGACTACGTCGCCCTCGAACAGGTGGCCTATGCCGAACTTGGCCTGGCTTCCATGAGCCATCGCCCGGACGGCCCGCCGCCGCTGGTGAAGTATGCGCTCACCCACCTGTTCGTACAGGCCGAG…	ATGTCCGAATTCTTCATCAAGCGGCCGAACTTCGCCTGGGTGGTGGCCCTGTTCATCTCCCTGGCCGGCCTGCTGGTCATTTCCAAATTGCCGGTAGCGCAGTACCCCAATGTCGCGCCGCCACAGATCACCATCACCGCCACCTATCCCGGCGCCTCGGCGAAGGTGCTGGTGGACTCCGTCACCAGTGTGCTCGAGGAGTCGCTGAACGGCGCCAAGGGCCTGCTCTACTTCGAGTCGACCAACAACTCCAACGGCACCGCCGAGATCGTCGTCACCTTCGAGCCGGGCACCGATCCGGACCTGGCCCAGGTGGACGTGCAGAACCGCCTGAAGAAAGCCGAGGCGCGCATGCCGCAGGCGGTGCTGACCCAGGGCCTGCAGGTCGAGCAGACCAGC…	ATGAGCCAGCAGCAGATGCCCGTGGCCCTCGATCCGCTGGACTTCCCGTTGCACGGCAGCCGCCTGATCGAGGCCAGCGCCGGTACCGGCAAGACGTTCACCATCGCCCTGCTATACGTACGCCTGGTCCTCGACCATGGCGGCGAGAACGCTTTCGGCCGGCCGCTGAGCCCGCCGGAAATCCTCGTGGTGACCTTCACCGATGCGGCGACCCAGGAACTCCGCGAGCGTATCCGCAGCCGCCTGGGCGAAGCGGCGCGTTGTTTCGCCGAGCCGCAGGAGCGCCACGACGGCCTGCTGGTCGCGTTGCGCCAGCAGTATCCCGCCGAGCGCTGGCCGGGCTGCGCGCGCCTGCTGCGCCTGGCCGCGGAGTGGATGGACGAGGCCGCGGTATCGACC…	ATGAGGCGCGCCAGCCTGCATATGTTGCTCTGCCAGTTCGCCATGGCCCTGGGCCTGCTCCTGAGCCTGGGCAGCGAGGCCTGGGCCGCCAGGCCGGCTCCGCAGGCGGCCGTCGACCTGGAAGCGCCGCCCGCCCTGGCCGAGGACGCCAGCCTCGACCAGCTCAACGCGCAACTCGACCTGATCCGCCAGCGCGTTACCGCCGACGCCAGCGACGACCTCCTCGCCGAGTTGCGCCAGAGCGCGCTGCAAGTCCAGCGCCAGGCCGACGCCCTGCTCGCGCTGCGGGTGGCCGACATCGAGCGGCTCGACGATCAGTTGAAAGTGATCGGCCCGCCGCAGCCCGACGAGGCGGAAAGCCTCGCCGCCCAGCGCCAGGCCCTGACCCGGCAGAAGAAC…	CTGCTGTTCGCCGCAGTGGTCATCGGCTTCCCCCAGCGCGCCGGCGAATGGCTGCTGGCCGCGCAGACCTGGGCCTCGCAGACCGTCGGCTGGTACTACCTGCTGGCGATGACGCTGTACCTGATCTTCGTGGTGGTCACCGCGCTTTCCGGCTACGGCAAGATCAAGCTCGGTGCCGACCACGACGAGCCGGAATTCAGCTACCTGTCCTGGGCCGGCATGCTGTTCGCCGCCGGCATCAGCATCACCCTGTTCTTCTTCTGCGTATCCGAACCGCTGACCCACTTCCTCCAGCCGCCGCAAGGCGAGGCCGGTACCCAGGAAGCCGCGCGGCAGGCCATGGAACTGCTGTTCCTGCACTGGGGCCTGCACGGCTGGGGCGTATTCGCCCTGGTGGCG…	ATGGTCCAGGGCACCACCTCGGACGCCGGCAAGAGCACCCTGGTGACCGCGCTGTGCCGCTGGCTGGCCCGGCGCGGCGTCGCGGTGGTGCCGTTCAAGCCGCAGAACATGGCGCTGAACAGCGCGGTCACCGCCGACGGCGGCGAGATCGGCCGCGCCCAGGCGGTCCAGGCCCAGGCCTGCCGGCTGGCGCCGCACACCGACATGAACCCGGTGCTGCTCAAGCCGAACACCGACATCGGCGCCCAGGTGATCATCCATGGCCGCGCGGTGACCAGCATGGACGCCGCCGCCTACCACGACTACAAGCGCGTGGCGATGGAAGCGGTGCTGGCTTCCCATGGGCGGCTCGCCGCCGCCTACCGGGTGGTGATGGTGGAGGGCGCCGGCTCGCCGGCG…	ATGGCCAGCCTGTTCCTCGGTCGCAAGGAAATCGACGACGACCTGCTCGACGACATCGAGACGCGCCTGCTGACCGCCGACGTCGGCGTCGAGGCCACCACCCTGATCGTGCAGAACCTGACCAAGCGCGTGGCGCGCAAGGAGCTGGCCGACAGCGGCGCGCTGTACAAGGCGCTGCAGGAAGAGCTGGCCAGCCTGCTGCGCCCGGTGGAGCAGCCGTTGCAGGTCGACGTCGCGCGCGAGCCCTATGTGATCCTGGTGGTCGGGGTGAACGGCGTGGGCAAGACCACCACCATCGGCAAGCTGGCGAAGAAGCTGCAACTCGAGGGCAAGAAGGTCATGCTGGCCGCCGGCGACACCTTCCGCGCTGCCGCCGTGGAGCAGTTGCAGGTCTGGGGC…	TTGCGCATCGAGAACTTCGCACCCATCGACAGCCAGGGTTTCCGTTTCCTGCTCCGGCCAGGTGACGAACCTCTGCTCGCGCTCATCGATCGCGCCCTGCCGCATATTAGCGGGCGCTACGGCGACGAACTGTTGCGCAGCTGGAGCGCCGGGAGGCGCCTGCGCTTCGACGATCCCCGGGTGACGCTGTCGCCGGCGGAACAGCGTTGGCTCTCCGCGCACCCGGTCGTGCCGGTGGTGATCAACCATTCCCTTGGCGCGCTCGGGCAACTGGATAACGAGGGGAGGCTGAGTGGTATCGGGCGTGACTATCTGGACCTGATCGGCAAGCGCAGTGGCCTGCGGTTTTCCTTCACTGGAGCACGCAACTTCGTCGAGACGAAAAGTCGACTGGATGCG…	TGAGCCACCGCCCGCGGACGACTACTACGAAGTCGACATGGATACCCTGGCCTACCTGGATGCCGCGCCCGAGCCTGACGTGGTCGTGGTGGAGGAGCCGCTGCCGGCGGCGAAGCCGGCCACCGGCCTGGCCGCGGAGTGGCTGGAGCTGTTCCCGCGGCTCGGCCTCGGCGGCCTGACCGCGAGCATCGCTGCCAACTGTACGCTGGTAGCTGCCGACGGCGACCACTGGCATCTGCATCTCGATCCGGGCCAGAGCGCGCTGTTCAACGCCACCCAGCAGCGGCGGCTGAACGATGCGCTGAACCAGCACCTGGGGCGCACCCTCAAACTGGAGGTGACCCTGCAGAAGCCTGAGCAGGAGACCCCGGCCCAGGCAGCGGCACGCCGGCGTGCCGA…	ATGTCGCAGACGCCGTCCCTCGCCCAGCTCCAGCCCGCCGATGCCTTCCTGCGCCGCCACCTCGGCCCCGATCCGGCGGAACAGCAGGCCATGCTGGACTTCCTCGGAGTTTCCACTCGCGCCGAACTGATCGTGCAGACGGTGCCGCCGGCGATCCGCCTCAACCGGCCGCTGGAACTGCCCGCCGCGCTCGACGAACAGGCCGCCCTGGCGCGCCTGCGCGGCTACGCCGGGCTCAACCAGCGCTGGACCAGCCTGATCGGCATGGGCTACTACGGCACAGTGACGCCGCCGGTGATCCTCCGCAACGTGCTGGAGAATCCCGGCTGGTACACCGCCTATACGCCCTACCAGCCGGAAATCGCCCAGGGCCGCCTGGAAGCGCTGCTGAATTTCCAG…	GTGATTCTCGCCGACGAGCAGGAAGAGTTCGGCGGCAGCCTGCTGGACACCCGCGAGACCCTCGACGGCAAGCCCGCCGCCGAGTGGGTCGCGGACGCCGTGGCCGAGCTGCAAGGCCTGCCGGAAGTCATCCTGCTGCCGCGCTCCACGGTCAACGGCTACCACGACCACAACTTCCTCACCATCCACGAGCGGCGCACCGACCACCTCGGCGAGGTCGCCCCGCTCGGCCAGGTCCGCCAGCGCGTGCACCGCGTACGCGCCAAGCGCGTGGTACTGGCCGCCGGCGCCCATGAGCGGCCGCTGGTCTACGGCAACAACGACCTGCCCGGCAACATGCTCGCCGGCGCGGTTTCCACCTATGTACGGCGCTACGGCGTGGCACCGGGCAAGAAACTG…	GTACGCAGCTATCTCGAATGGCTGCTGGACAACCACTTCACCTTCCTCGGCTACGAGGAATTCAGCGTCGCCGACGAGGCCGACGGCGGGCGCATGGTCTACGACGAGAAATCCTTCCTCGGCCTGACCCGTCTGCTGCGTGCCGGCCTGAGCAAGGATGACCTGCACATCGAGGACTATGCCGTCGCCTACCTGCGCGAACCGGTCCTGCTGTCCTTCGCCAAGGCTGCCCATCCGAGCCGTGTGCACCGCCCGGCCTACCCGGACTACGTGTCGATCCGCGAGCTGGACGGCAAGGGCCGGGTGATCCGCGAGTGCCGCTTCATGGGCCTGTTCACCTCCTCGGTGTACAACGAGAGCGTCAACGACATCCCCTTCATCCGCGGCAAGGTCGCCGAA…	GTGTACGGCGAATATTCTCGGGAAAGCATTGTCTGCCTGCTCGCCATACTATTATCCGGCCATCACTACTTATATATAGACCTGAAACAACCGGCGGCCTGGAATGCAGAGTTGTGCCGGCAGGTCGACTGCCGCCTGATCCTCGACTGCTCGACCACGCCGACGCCCGCCAACGGTCTTCCCTGCGTCCCGGTCAGGCACCTGCCTGCCGCTCCAGCCTCGGTCGCCCGGCCATGCTTCGCGGCGGACCAGATCGCCTACATCAACTTCTCCTCGGGCACCACCGGCCGCCCGAAAGCCATCGCCTGCACCCACGCCGGCATTACCCGTCTGTGCCTGGGCCAGTCGTTCCTCGCGTTCGCTCCGCAGATGCGCTTCCTGGTGAACTCGCCGCTGTCC…	CTGCTGGAAGAAGGTGCGGACGAGGTATTCGAGGAAATCCTCGCCGCCGCTACGTCCTACTTCCAGACGCCCATCGCGCTCATTTCCATCCTCGACCATCAGCGCCAGTGGTTTCGCGCGAGCATCGGCCTCGATATCCGGCAGACGCCGCGACGGGATTCGTTCTGCGCCTATGCGATCCTGGGCAAGGGAGTATTCGAGGTGGCCGACGCCACCCTCGACCCGCGCTTCCGGGACAACCCCTATGTGCAAGGCGAACCGCGCATCCGCTTCTACGCCGGGGCTCCGCTGGCCACCGCGGAAGGTCTCAACCTCGGCAGCCTCTGCGTCATCGACCGGGAACCACGCGGGCCGCTGGCCGAGCGGGACGTCGCCATGCTCGAGCACTTCGCCCGGCTG…	ATGTCCCTGAGTGTCTTCGATCTGTTCAAGATCGGCATCGGGCCGTCCAGCTCCCACACCGTGGGGCCGATGCGTGCCGCCGCGCGCTTCGCCGAGGGGCTGAGGCGCGAGGGGTTGCTGGAGGCCACTGCCAGCGTCAAGGTCGAGCTGTACGGCTCGCTCGGCGCCACCGGCAAGGGCCACGGCAGCGACAAGGCGGTACTGCTCGGCCTGGAGGGCGAGCAGCCGGACACGGTGGATACCGCCGCGATTCCCGCCCGGCTCGATGCCATCCGTTCCAGCGGCGAGCTGCGCCTGCTCGGCGAGCGGCCGATCCGCTTCGTCGAGAAGGAACACCTGGCGCTGATCCGCAAGCCGCTGGCCTACCATCCCAACGGCATGATCTTCCGTGCCTTCGAC…	ATGAACAGAGTTTTCCTGACCCCGGCAGCCGTGGCGCTGTGCGGCGCGTCTTCCCTGAGCCTGGCCGAACCGGTCAGCCTTGCCGACCAGGTGGTGACCGCCACCCGTACCGCCCAGACCGCTTCCCAGAGCCTGGCGGCAGTGAGCGTCATCGACCGCGAGGATATCGAGCGCAGCCAGGCGCGCAGCGTGCCGGAGCTGTTGCGCCAGGTACCCGGCGTGTCGCTGGCGAACAACGGCGGTTTCGGCAAGAACACCACGCTGTTCCTGCGCGGCACCGAGTCCGACCATGTACTGGTGCTGATCGACGGCATCAAGGTCGGCTCGGCCAGCGCCGGCCTCACCGCGTTCCAGGATTTGCCGGTGGAGCTGATCGAGCGCATCGAGGTGGTCCGCGGG…	GTGCGGGTGCTCAACTGGAGCTGGGGCATCCACCGCGTCGGCGCTCGCGACGTCGATGGCGACGAGGTGGATTCGCTGGTGCGCTCGGGGATTGCCATGAGCGGCTACGAGGAGTTGCTCGAGGAGTTCTTCCTCTGGCTGCGCAAGGAGCATCCGGACGTGCTGGTGGTCAACTCCGCCGGCAACGGCTCGTCCTACTCCGGTACCGACGAATACCGCCTGCCGTCCTCCTTCGTTACCGAGCAGTTGCTGGTGGTGGGCGGCCACCAGCGCAGCGAGCGCCAAGGCCTGGCGGTGGACGACCCGGCCTACGCGGTCAAGCGCAGCACCTCGAACGTCGACATGCGGGTGGATGTCACCGCCGCCGCCTGTACCCATGCCTCGACCCTGGAGCGGGAC…	TTGCAGGCAGCTTGCGCGTTCGGCCCGCCCGGGCGGCTATTCCGCGCCTGCGACGAGCAAGGACGCGAGGCGTTGCTGCTGCTCGCGGCGGTCGATGCCGACGAAGCGTTCTGGCAGCGCGAATGGGCATTGCGGCGCTGCCGTGCGGAGAGCCTGCCGCGAGTATTGTCGTCGCCCCGGTTGCGTCGTCATGCCTTCCAGTTGTTCGCTCCGCCGCGCTGGCCGATGCGCAGCCTGCTGGATTGGGCGCCAGCGCACCTGCCGCTGGAACCGCAATGCGCGCTGGTCCTCCTGGAGCAACTTATCGATGCGGTTCGCGCCTTGCAGCGGCGCGGCGTACAGGGCTTGTGGCTGGCGCCGCGGCAGATCCTGCTGGACGAGGGCGGGCGCCTGCTGTTC…	ATGTTCAACCCGGCCAACCAGACCCACTTCAGCCTCACCCTCGACGGCCTCCGCCACGACCTGCAGGTCCTCGCCTTCAACGGCCACGAAGGCATCAGTCGCCCCTACCGTTTCGAACTCGAACTGGTCGGAGAGCGCGCCGGCCTCGACCTCGAAACGTTCCTCCACCGGCCCGCCTTCCTCGCCTTCACCCCGCAGGGCCAGGGTGTCCACGGCCTGGTCTACGGCGCTGCCCAGGGCGATGCCGGCAAGCGCCTGACCCGCTATCGCCTCACCCTCGTCCCGCACCTGGCCTACCTCGCCCAGCGCAACAACCAGCGGATCTTCCAGCACCTCACGGTGCCGCAGATCGTCGCCCTGGTCCTCGAGGAGCACGGCATCCTCGCCGACGCCTACCGC…	GTGGCTCTCCATCGCCTGGCCTTTATCTTCCTGTGCCTGCCGCTCATGGCCAGCGCCGCCCCCTTCACCTCCCCCGGCGACCGCGACCTGATCCGCGACCGCCAGCAGCGCCTGCTGGACGAACAGCGCAAGCGCCTGGAGGAACTCCAGCAACTGCCCGGCAAGGGAGCGCCCGCCGCTGCGGATGCCTCCGGCGACGACGAGCGCTGCTTCGAGATCCGCCGCATCGAGCTGGAGGGCGCCGGGCACCTCGGCGAAAGCGCGCGTCGCCAACTGCTGGCGCCCTACCAGGGGCGCTGCCTGGGCGTCGGCCAGCTCAATGCGCTGCTCAAGGCCGTCACCGACCATTACCTGGATCGCGGCTACGTCACCACCCGCGCCTACCTGCCACAGCAGGAC…	ATGGGTGACCGGCACGACTACGTCGCTCTGGAATGGGTGAAAGGCGAGATCGCCGAAACCCTGAAACAGGCGCGCCAGGCGCTGGAAGCGTTCGTCGAGAACCCGCAGGACCCGACCCGCATGCGGTTCTGCCTGACCTACGTGCACCA---GGTGCAGGGCACCCTGCAGATGGTCGAGTTCTACGGCGCGGCCCTGCTCGCCGAGGAAATGGAGCAGTTGGTCCAGGCCTTGCTGGACGGTCGCGTGCCGAACCAGGGCGAGGCCCTGGAAGTGCTGATGCAGGCGATCCTGCAACTGCCGGTCTACCTCGACCGGATCCAGACCGCCCGGCGCGACCTGCCGATGGTGGTCCTGCCGCTGCTCAACGACCTGCGCGCCGCGCGCGGCGAGAAGCTG…
22	ATGACCTTCGACGCCGCGTTCCAGCAGCTCGGCGAGCGGATGGCCGGCGGGGCCCTGGCGGAAACGGCGCTGGCGCCGTTCACCCATCTGCTGCTCGACGAGTTCCAGGATGTCTCGCCGCAGATCGTCCTCTGGCTACAGGCGTTGCACCGCCGCCTGGCGA---ACCAGGGCACCGCGCCGAGCCTGATGGCCATCGGCGACGACTGGCAGTCGATCTACGGCTGGCGCGGCAGTTCGCCGGAGCTGTTCATCGACTTCGACCGGCACTTCCCCTCGCGTGGGCGGGGACGCAAGAGCGCGCTGCTGGTGCTGGAAACCAACTACCGCTCCGTCGAACCGATCATTCGCGACGGCGAGAAGGTGCTGGCCGGGGTGCGTTTCAAGCAGGACAAGACC…	ATGCACCTGTTGCGCACCCAACCTGGCGGCTTCGTTCCCGACGACGGCATCGCCCACCTGGCCCAGACTCCCGCCGAGCTGGTGATCCTCTGCAGCGGCGATTCGCACCTGGCATTGCTGGCCGAGGCCGCCCGTGCGCTGCCGGACGACTACCCGAGCCTGCGCCTGGCCAACCCCATGCAGTTGCAGAACCACGCCTCGGTGGACCTCTACGTCGACGAAGTGCTGCGGCACGCGCGGGTGATCCTGCTTTCGCTGCACGGCGGCATCGGCTACTGGCGCTACGGCGTGGAGCAACTGGTGGCGCTGGCCGAGCGCGGTTCGCTGCTGATCCCGGTGCCCGGCGACGACCGCCCCGACCCGGAGCTGAGCGCCCTTGGCAACCTGCCGGCGGAGCAG…	ATGTTCGAACGCATCATCCAATTCGCCATCGAGCAACGCTGGCTGGTCCTGCTGGCGGTGCTGGGGATGGCCGGGGTCGGCATCGGCAGCTACCAGAAGCTGTCCATCGACGCGGTCCCGGACATCACCAACGTCCAGGTGCAGATCAATACCGCCGCCCCCGGCTACTCGCCGCTGGAAGTGGAGCAGCGGATCACCTACCCGGTGGAGACCGTCATGGCCGGCCTGCCGGGTTTGCAGGAAACCCGTTCGCTGTCGCGGCCGGGGATTTCCCAGGTGACGGTGATCTTCGAGGAGGGCACCGATATCTACTTCGCCCGCCAGCAGGTCAACGAACGCCTGAGCACGGCGCGCGAGCAACTGCCGGAAGACATCTCGCCGACCCTCGGGCCGATCTCC…	ATGTCCTTCAACCTTTCCGCCTGGGCGTTGCAGAATCGCCAGATCGTCCTGTACCTGATGATCCTGCTTGGCGCGGTCGGCGCGCTGTCCTACAGCAAGCTGGGGCAGAGCGAAGACCCGCCGTTCACCTTCAAGGCCATGGTGGTGCAGACCAACTGGCCGGGCGCCAGCGCCGAAGAGGTGGCCCGGCAGGTCACCGAGCGTATCGAGAAGAAGCTGATGGAAACCGGCGACTACGATCGCATCGTGTCCTTCTCCCGCCCCGGCGTCTCGCAGGTGACCTTCATGGCCCGCGAGGACATCCATTCCAGCGAGATCCCCGAACTCTGGTACCAGATCCGCAAGAAGATCAGCGACATTCGCGCCACCTTGCCGCAAAGCATCCAGGGCCCGTTCTTC…	ATGCGCACCGAGCAACCGAAAGTCATCCACCTCAAGGACTATCAGGCGCCGGACTACCTGATCGACGAGACCCACCTGAAGTTCGAACTGTTCGAAGACCACAGCCTGGTACACGCCGAGTTGAAGCTGCGGCGCAACCCCGAGCGCGGCGCCGGCCTGCCGCCGCTGTTGCTGCATGGCCAGCAACTGGAGCTGCTGGCGCTCGAACTGGACGGCCAGGCGCTCGGCGCGGACGACTACCAACTGGACGACGAGCAGCTCGGGGTGCAACCGCGGCAGGCCGAGTTCGTCCTCAGGAGCACGGTGCGTATCCATCCGGAGAGCAACACCGCGCTGGAAGGCCTGTACAAGTCCGGCAAGATGTTCTGCACCCAGTGCGAGGCCGAGGGTTTCCGCAAG…	ATGACCGATAACCTGAACCTCGGCGCCATCGACCTGGGCACCGACGACGAATTCATCGCCCGCCATATCGGCCCGCGTGCCGCCGACACCCAGGCCATGCTCCAGCGCCTGGGCTACGACTCGCTGGACGCGCTGATCGGCAACGTGATCCCCGACAGCATCAAGGGCAGCAGCGTGCTCGACCTGCCGGCCGGCATGGGCGAGGCCGAGGCGCTGGCCAGCCTGAAGGCGATCGCCGCGCGCAATCGCGCGTTGCGTTCCTTCATCGGCCAGGGCTACTACAACTGCCACACCCCGGCACCGATCCTGCGCAACCTCCTGGAGAACCCGGCCTGGTACACCGCCTACACGCCGTACCAGCCGGAAATCTCCCAGGGCCGCCTGGAGGCGCTGCTGAAC…	GCAGGTTTCCCATGACGAGCTGGTCGCTCGCCTGTCCATGGTCGGCCTCGAGGTCGACGCCGACCTGCCGGTCGCCGGCGCCTTCAGCGGCGTGGTGGTCGGTGAGGTGCTCTCGACCGAACAGCATCCGGACGCCGACAAGCTGCGCGTCTGCCAGGTCAGCAACGGCAGCGAGACCTTCCAGGTCGTCTGCGGTGCGCCCAACGTGCGCGCGGGCCTGAAGATTCCCTTCGCCATGATCGGCGCCGAACTGCCGGGCGACTTCAAGATCAAGAAAGCCAAGCTGCGCGGCGTCGAGTCCTTCGGCATGCTCTGCTCGGCCAAGGAATTGCAGATCAGCGAAGAGAACGCCGGTCTGCTCGAGCTGCCGGCCGACGCGCCGGTCGGCCAGGACGTCCG…	ATGAGCGAGAACAACACGTACGACTCTTCCAGCATCAAGGTGCTGAAGGGGCTGGATGCCGTACGCAAGCGCCCCGGCATGTACATCGGCGACACTGACGATGGCACCGGTCTGCACCACATGGTGTTCGAGGTGGTGGATAACTCCATCGACGAAGCGCTGGCCGGTTACTGCAGCGAAATCAGCATCACCATCCATACGGATGAGTCGATCACTGTCCGCGACAATGGACGCGGTATTCCGGTGGATATCCACAAGGAAGAAGGGGTTTCTGCGGCGGAAGTGATCATGACCGTCCTCCACGCCGGCGGCAAGTTCGACGACAACACCTACAAGGTGTCCGGCGGCTTGCACGGTGTGGGCGTCTCGGTGGTGAACGCGCTGTCCCATGAACTACGC…	ATGCTGATCCTGCGCGGCGCTCCCGCCCTTTCCGCTTTCCGCCACGGCAAACTGCTCGAGCAACTGACCCAGCACGTACCTGCCGTTACCGGGCTGTACGCTGAGTTCGCGCATTTCGCCGACGTCACCGGCGCGCTCACCGCCGACGAGGAGCAGGTGCTGGCGCGGCTGCTGAAATACGGCCCGAGCGTGCCGGTGCAGGAGCCCAGCGGACGGCTGTTCCTGGTGGTGCCGCGCTTCGGCACCATCTCGCCGTGGTCGAGCAAGGCCTCCGACATCGCCCGCAACTGCGGCCTGGCGAAGATCGACCGGCTGGAGCGCGGCATTGCCTACTATGTGCAGGGCGAACTGTCCGAGAGCGACGCCCAGCAGGTCGCCGCCCGCCTGCATGACCGCATG…	ATGAGTGGCCGCTCCGCTGGTTTCGCCCTGCCCAGCCGCGACGAGTGGCGGCGCGCGCTGGCCGAGTGGGCGCGCAGCGACGGGGCGACCTGGATCTACGTGTTCAAGGTGCTCTGCGCGGCCTTCCTGACCCTCTGGCTGGCGATGCGCCTGGAGTTGCCGCAACCGAGCACGGCGACCATCACCGTGTTCATCGTCATGCAGCCGCAGAGCGGCCAGGTGTTCGCCAAGAGCTTCTACCGCATCCTCGGCACCCTGGTCGGCCTCAGCGTGATGGTCACCCTGATCGCCCTGTTCGCCCAGGAGCGGGTGCTGTTCCTGCTCAGCTCGGCGATCTGGATCGGTCTCTGCACCGCCGGGGCCGCCCGCTACCGTGACTTCCGCTCCTACGCCTGCGTG…	ATGAGCGAATCCCTCGATCTGAGCCTGGAAGGGGTCGAACGCCGGTCGTTGGCCGAGTTCACCGAGCAGGCCTATCTGAATTATTCCATGTACGTGATCATGGACCGCGCCCTGCCGCATATCGGCGACGGCCTGAAGCCGGTGCAGCGACGCATCGTCTACGCCATGAGCGAACTGGGGCTGGATGCCGATTCCAAGCACAAGAAGTCGGCGCGCACCGTCGGCGACGTGCTCGGCAAGTTCCACCCGCACGGCGACTCGGCCTGCTACGAGGCCATGGTGCTGATGGCGCAGCCGTTCTCCTATCGCTATCCGCTGGTGGACGGCCAGGGCAACTGGGGGGCGCCGGACGATCCCAAGTCCTTCGCCGCCATGCGTTATACCGAGGCGCGCCTGTCG…	ATGTCTTCACGCAAGATCGGGCTCAACCTGGTGGTCATCGTCGCCCTGGCCGCCCTCTTCACCGGCATCTGGGCCCTGTACAACCGTCCGGTCAGCGTACCGGACTGGCCGGAACGCATCTCCGGCTTCTCCTTCTCGCCGTTCCGCCTCAACCAGAATCCGCAGAGCGGCCGCTACCCCAGCGCCGAACAGATGCGCGCCGACCTGGAACTGGTCGCCCGGCACACCCACAGCATCCGCACCTATTCGGTCCAGGGCGCGCTCGGCGACATCCCGGCGCTGGCCGAGGCGTTCGGCCTGCGCGTCAGCCTGGGCATCTGGCTCGGCCCGGACCTGGCCGGCAACGAGGCCGAGATCGCCCACGCCATCCGCATCGCCAACGAGTCGCCGAGCGTGGTG…	ATGACCGCCATGCCCGAAGTACTTCGCGAAGATACGCTGAACATCCCCGACAGCCGTGGGCTGAATCTCTACACCTGCGATCCGGCCCTGGAGCGGCTGCTGGAGGTATACCTGCCGCCGGCGTTGCTCGCCGAATGGCGGCCGCTCCTCGAACGGCTCGGCGCCCGTGCCGGCGGCGAGCTGGACGTGCTGGCGCTGGCGGCGGACAAGAATCCGCCGGTGCTGGCGCCGCGCACCCGCCGCGGCGAGGATTTGCAGAGCATTCGCAAGCATCCGGACTACGTCGCCCTCGAACAGGTGGCCTATGCCGAACTTGGCCTGGCTTCCATGAGCCATCGCCCGGACGGCCCGCCGCCGCTGGTGAAGTATGCGCTCACCCACCTGTTCGTACAGGCCGAG…	ATGTCCGAATTCTTCATCAAGCGGCCGAACTTCGCCTGGGTGGTGGCCCTGTTCATCTCCCTGGCCGGCCTGCTGGTCATTTCCAAATTGCCGGTAGCGCAGTACCCCAATGTCGCGCCGCCACAGATCACCATCACCGCCACCTATCCCGGCGCCTCGGCGAAGGTGCTGGTGGACTCCGTCACCAGTGTGCTCGAGGAGTCGCTGAACGGCGCCAAGGGCCTGCTCTACTTCGAGTCGACCAACAACTCCAACGGCACCGCCGAGATCGTCGTCACCTTCGAGCCGGGCACCGATCCGGACCTGGCCCAGGTGGACGTGCAGAACCGCCTGAAGAAAGCCGAGGCGCGCATGCCGCAGGCGGTGCTGACCCAGGGCCTGCAGGTCGAGCAGACCAGC…	ATGAGCCAGCAGCAGATGCCCGTGGCCCTCGATCCGCTGGATTTCCCGTTGTACGGCAGCCGCCTGATCGAGGCCAGCGCCGGTACCGGCAAGACGTTCACCATCGCCCTGCTATACGTACGCCTGGTCCTCGACCATGGCGGCGAGAACGCTTTCGGCCGGCCGCTGAGCCCGCCGGAAATCCTCGTGGTGACCTTCACCGATGCGGCGACCCAGGAACTCCGCGAGCGTATCCGCAGCCGCCTGGGCGAAGCGGCGCGTTGTTTCGCCGAGCCGCAGGAGCGCCACGACGGCCTGCTGGTCGCGTTGCGCCAGCAGTATCCCGCCGAGCGCTGGCCGGGCTGCGCGCGCCTGCTGCGCCTGGCCGCGGAGTGGATGGACGAGGCCGCGGTATCGACC…	ATGAGGCGCGCCAGCCTGCATATGTTGCTCTGCCAGTTCGCCATGGCCCTGGGCCTGCTCCTGAGCCTGGGCAGCGAGGCCTGGGCCGCCAGGCCGGCTCCGCAGGCGGCCGTCGACCTGGAAGCGCCGGCCGCCCTGGCCGAGGACGCCAGCCTCGACCAGCTCAACGCGCAACTCGACCTGATCCGCCAGCGCGTCACCGCCGACGCCAGCGACGACCTCCTCGCCGAGTTGCGCCAGAGCGCGCTGCAAGTCCAGCGCCAGGCCGACGCCCTGCTCGCGCTGCGGGTGGCCGACATCGAGCGGCTCGACGATCAGTTGAAAGTGATCGGCCCGCCGCAGCCCGACGAGGCGGAAAGCCTCGCCGCCCAGCGCCAGGCCCTGACCCGGCAGAAGAAC…	CTGCTGTTCGCCGCGGTGGTCATCGGCTTCCCCCAGCGCGCCGGCGAATGGTTGCTGGCCGCACAGACCTGGGCCTCGCAGACCGTCGGTTGGTACTACCTGCTGGCGATGACGCTGTACCTGATCTTCGTGGTGGTCACCGCGCTTTCCGGCTACGGCAAGATCAAGCTCGGTGCCGACCACGACGAGCCGGAATTCAGCTACCTGTCCTGGGCCGGCATGCTGTTCGCCGCCGGCATCAGCATCACCCTGTTCTTCTTCTGCGTATCCGAGCCGCTGACCCATTTCCTCCAGCCGCCGCAAGGCGAGGCCGGTACCCAGGAAGCCGCGCGGCAGGCCATGGAACTGCTGTTCCTGCACTGGGGCCTGCACGGCTGGGGCGTGTTCGCCCTGGTGGCG…	ATGGTCCAGGGCACCACCTCGGACGCCGGCAAGAGCACCCTGGTGACCGCGCTGTGCCGCTGGCTGGCCCGGCGCGGCGTCGCGGTGGTGCCGTTCAAGCCGCAGAACATGGCGCTGAACAGCGCGGTCACCGCCGACGGCGGCGAGATCGGCCGCGCCCAGGCGGTCCAGGCCCAGGCCTGTCGGCTGGCGCCGCACACCGACATGAACCCGGTGCTGCTCAAGCCGAACACCGACATCGGCGCCCAGGTGATCATCCATGGCCGCGCGGTGACCAGCATGGACGCCGCCGCCTACCACGACTACAAGCGCGTGGCGATGGAAGCGGTGCTGGCTTCCCATGGGCGGCTCGCCGCCGCCTACCGGGTGGTGATGGTGGAGGGCGCCGGCTCGCCGGCG…	ATGGCCAGCCTGTTCCTCGGTCGCAAGGAAATCGACGACGACCTGCTCGACGACATCGAGACGCGCCTGCTGACCGCCGACGTCGGCGTCGAGGCCACCACCCTGATCGTGCAGAACCTGACCAAGCGCGTGGCGCGCAAGGAGCTGGCCGACAGCGGCGCGCTGTACAAGGCGCTGCAGGAAGAGCTGGCCAGCCTGCTGCGCCCGGTGGAGCAGCCGTTGCAGGTCGACGTCGCGCGCGAGCCCTATGTGATCCTGGTGGTCGGGGTGAACGGCGTGGGCAAGACCACCACCATCGGCAAGCTGGCGAAGAAGCTGCAACTCGAGGGCAAGAAGGTCATGCTGGCCGCCGGCGACACCTTCCGCGCCGCCGCCGTAGAGCAGTTGCAGGTCTGGGGC…	TTGCGCATCGAGAACTTCGCACCCATCGACAGCCAGGGTTTCCGTTTCCTGCTCCGGCCAGGTGACGAACCTCTGCTCGCGCTCATCGATCGCGCCCTGCCGCATATTAGCGGGCGCTACGGCGACGAACTGTTGCGCAGCTGGAGCGCCGGGCGGCGCCTGCGCTTCGACGAGCCCCGGGTGACGCTGTCGCCGGCGGAGCAGCGTTGGCTCTCCGCGCACCCGGTCGTGCCGGTGGTGATCAACCATTCCCTTGGCGCGCTCGGGCAACTGGATAACGAGGGGAGGCTGAGTGGTATCGGGCGTGACTATCTGGACCTGATCGGCAAGCGCAGTGGCCTGCAGTTTTCCTTCACTGGAGCACGCAACTTCGTCGAGACGAAAAGCCGACTGGATGCG…	CGAGCCACCGCCCGCAGACGACTACTACGAAGTCGACATGGATACCCTGGCCTACCTGGATGCCGCGCCCGAGCCTGACGTGGTCGTGGTGGAGGAGCCGCTGCCGGCGGCGAAGCCGGCCACCGGCCTGGCCGCGGAGTGGCTGGAGCTGTTCCCGCGGCTCGGCCTCGGCGGCCTGACCGCCAGCATCGGTGCCAACTGTACGCTGGTAGCTGCCGACGGCGACCACTGGCATCTGCATCTCGATCCGGGCCAGAGCGCGCTGTTCAACGCCACCCAGCAGCGGCGGTTGAACGATGCGCTGAACCAGCACCTGGGGCGCACCCTCAAACTGGAGGTGACCCTGCAGAAGCCTGAGCAGGAGACCCCGGCCCAGGCGGCGGCACGCCGGCGTGCCGA…	ATGTCGCAGACGCCGTCCCTCGCCCAGCTCCAGCCCGCCGATGCCTTCCTGCGCCGCCACCTCGGCCCCGATCCGGCGGAACAGCAGGCCATGCTGGATTTCCTCGGAGTTTCCACTCGCGCCGAACTGATCGTGCAGACGGTGCCGCCGGCGATCCGCCTCAACCGGCCGCTGGAACTGCCCGCCGCGCTCGACGAACAGGCCGCCCTGGCGCGCCTGCGCGGCTACGCCGGGCTCAACCAGCGCTGGACCAGCCTGATCGGCATGGGCTACTACGGCACCGTGACGCCGCCGGTGATCCTCCGCAACGTGCTGGAGAATCCCGGCTGGTACACCGCCTATACGCCCTACCAGCCGGAAATCGCCCAGGGCCGCCTGGAAGCGCTGCTGAATTTCCAG…	GTGATTCTCGCCGACGAGCAGGAAGAGTTCGGCGGCAGCCTGCTGGACACCCGCGAGACCCTCGACGGCAAGCCCGCCGCCGAGTGGGTCGCGGACGCCGTGGCCGAGCTGCAAGGCCTGCCGGAGGTCATCCTGCTGCCGCGCTCCACGGTCAACGGCTACCACGATCACAACTTCCTCACCATCCACGAGCGGCGTACCGACCACCTCGGCGAGGTCGCCCCGCTCGGCCAGGTCCGCCAGCGCGTGCACCGCGTGCGCGCCAAGCGCGTGGTACTGGCCGCCGGCGCCCATGAGCGGCCGTTGGTCTACGGCAACAACGACCTGCCCGGCAACATGCTCGCCGGCGCGGTTTCCACCTATGTACGGCGCTACGGCGTGGCACCGAGCAAGAAACTG…	GTACGCAGCTATCTCGAATGGCTGCTGGACAACCACTTCACCTTCCTCGGCTACGAGGAATTCAGCGTCGCCGACGAGGCCGACGGCGGGCGCATGGTCTACGACGAGAAATCCTTCCTCGGCCTGACCCGTCTGCTGCGTGCCGGCCTGAGCAAGGATGACCTGCACATCGAGGACTATGCCGTCGCCTACCTGCGCGAACCGGTCCTGCTGTCCTTCGCCAAGGCTGCCCATCCGAGCCGTGTGCACCGCCCGGCCTACCCGGACTACGTGTCGATCCGCGAGCTGGACGGCAAGGGCCGGGTGATCCGCGAGTGCCGCTTCATGGGCCTGTTCACCTCCTCGGTGTACAACGAGAGCGTCAACGACATCCCCTTCATCCGCGGCAAGGTCGCCGAA…	GTGTACGGCGAATATTCTCGGGAAAGCATTACCTGTCTGCTCGCCATACTGTTATCCGGCCATCACTACTTATATATAGACCTGAAACAACCGGCGGCCTGGAATGCAGAGTTGTGCCGGCAGGTCGACTGCCGCCTGATTCTCGACTGCTCGACCACGCCGACGCCCGCCAACGGTCTTCCCTGCGTCCCGGTCAGGCACCTGCCTGCCGCTCCAGCCTCGGTCGCCCGGCCATGCTTCGCGGCGGACCAGATCGCCTACATCAACTTCTCCTCGGGCACCACCGGCCGCCCGAAAGCCATCGCCTGCACCCACGCCGGCATTACCCGCCTGTGCCTGGGCCAGTCGTTCCTCGCGTTCGCTCCGCAGATGCGCTTCCTGGTGAACTCGCCGCTGTCC…	CTGCTGGAAGAAGGTGCGGACGAGGTATTCGAGGAAATCCTCGCCGCCGCTACGTCCTACTTCCAGACGCCCATCGCGCTCATTTCCATCCTCGACCATCAGCGCCAGTGGTTTCGCGCGAGCATCGGCCTCGATATCCGGCAGACGCCGCGACGGGATTCGTTCTGCGCCTATGCGATCCTGGGCAAGGGAGTATTCGAGGTGGCCGACGCCACCCTCGACCCGCGCTTCCGGGACAACCCCTATGTGCAAGGCGAACCGCGCATCCGCTTCTACGCCGGGGCTCCGCTGGCCACCGCGGAAGGTCTCAACCTCGGCAGCCTCTGCGTCATCGACCGGGAACCACGCGGGCCGCTGGCCGAGCGGGACGTCGCCATGCTCGAGCACTTCGCCCGGCTG…	ATGTCCCTGTGTGTCTTCGATCTGTTCAAGATCGGCATCGGGCCGTCCAGCTCCCACACCGTGGGGCCGATGCGTGCCGCCGCGCGCTTCGCCGAGGGGCTGAGGCGCGAGGGGTTGCTGGAGGCCACTGCCAGCGTCAAGGTCGAGCTGTACGGCTCGCTCGGCGCCACCGGCAAGGGCCACGGCAGCGACAAGGCGGTACTGCTCGGCCTGGAGGGCGAGCAGCCGGACACGGTGGATACCGCCGCGATTCCCGCTCGGCTCGATGCCATCCGTTCCAGCGGCGAGCTGCGCCTGCTCGGCGAGCGGCCGATCCGCTTCGTCGAGAAGGAACACCTTGCGCTGATCCGCAAGCCGCTGGCCTACCATCCCAACGGCATGATCTTCCGTGCCTTCGAC…	ATGAACAGAGTTTTCCTGACCCCGGCAGCCGTGGCGCTGTGCGGCGCGTCTTCCCTGAGCCTGGCCGAACCGGTCAGCCTTGCCGACCAGGTGGTGACCGCCACCCGTACCGCCCAGACCGCTTCCCAGAGCCTGGCGGCGGTGAGCGTCATCGACCGCGAGGATATCGAGCGCAGCCAGGCGCGCAGCGTGCCGGAGCTGTTGCGCCAGGTACCCGGCGTGTCGCTGGCGAACAACGGCGGTTTCGGCAAGAACACCACGCTGTTCCTGCGCGGCACCGAGTCCGACCATGTGCTGGTGCTGATCGACGGCATCAAGGTCGGCTCGGCCAGCGCTGGCCTCACCGCGTTCCAGGACTTGCCGGTGGAGCTGATCGAGCGCATCGAGGTGGTCCGCGGG…	GTGCGGGTGCTCAACTGGAGCTGGGGCATCCACCGCGTCGGCGCTCGCGACGTCGATGGCGACGAGGTGGATTCGCTGGTGCGCTCGGGGATTGCCATGAGCGGCTACGAGGAGTTGCTCGAGGAGTTCTTCCTCTGGCTGCGCAAGGAGCATCCGGACGTGCTGGTGGTCAACTCCGCCGGCAACGGCTCGTCCTACTCCGGTACCGACGAATACCGCCTGCCGTCCTCCTTCGTTACCGAGCAGTTGCTGGTGGTGGGCGGCCACCAGCGCAGCGAGCGCCAAGGCCTGGCGGTGGACGACCCGGCCTACGCGGTCAAGCGCAGCACCTCGAACGTCGACATGCGGGTGGATGTCACCGCCGCCGCCTGTACCCATGCCTCGACCCTGGAGCGGGAC…	TTGCAGGCGGCTTGCGCGTTCGGCCCGCCCGGGCGGCTGTTCCGCGCCTGCGACGAGCAAGGACGCGAGGCGTTGCTGCTGCTCGCGGCGGCCGATGCCGACGAAGCGTTCTGGCAGCGCGAATGGGCATTGCGGCGCTGCCGTGCGGAGAGCCTGCCGCGAGTATTGTCGTCGCCCCGGTTGCGTCGTCATGCCTTCCAGTTGTTCGCTCCGCCGCGCTGGCCGATGCGCAGCCTGCTGGATTGGGCGCCAGCGCACCTGCCGCTGGAACCGCAATGCGCGCTGGTCCTCCTGGAGCAACTTATCGATGCGGTTCGCGCCTTGCAGCGGCGCGGCGTACAGGGCTTGTGGCTGGCGCCGCGGCAGATCCTGCTGGACGAGGGCGGGCGCCTGCTGTTC…	ATGTTCAACCCGGCCAACCAGACCCACTTCAGCCTCAGCCTCGACGGCCTCCGTCACGACCTGCAGGTTCTCGAATTCAGCGGCCACGAAGGCATCAGCCGGCCCTACCGCTTCGAACTCGAACTGGTCAGCGAGCGCGCCGGCCTCGACCTCGAAGCGCTCATGCACCGACCCGCCTTCCTCGCCTTCACCCCGCAGGGCCAGGGCGTCCACGGGCTGGTCTACGGCGCCGCCCAGGCCGACGCGGGCAAGCGCCTGACCCGCTATCGCCTCACCCTCGTGCCGCAACTGGCCTACCTCGCGCAGCGCAGCAACCAGCGGATCTTCCAGCACCTCACGGTGCCGCAGATCGTCGCCCTGATCCTCGAGGAGCACGGCATCCTCGCCGACGCCTACCGC…	GTGGCTCTCCATCGCCTGGCCTTTATCTTCCTGTGCCTGCCGCTCATGGCCAGCGCCGCCCCCTTCACCTCCCCCGGCGACCGCGACCTGATCCGCGACCGCCAGCAGCGCCTGCTGGACGAACAGCGCAAGCGCCTGGAGGAACTCCAGCAACTGCCCGGCAAGGGAGCGCCCGCCGCTGCGGATGCCTCCGGCGACGACGAGCGCTGCTTCGAGATCCGCCGCATCGAGCTGGAAGGCGCCGGGCACCTCGACGAAAGCGCGCGTCGCCAGTTGCTGGCGCCCTACCAGGGGCGCTGCCTGGGCGTCGGCCAGCTCAATGCGCTGCTCAAGGCCGTCACCGACCATTACCTGGATCGCGGCTACGTTACCACCCGCGCCTACCTGCCACAGCAGGAC…	ATGGGTGACCGGCACGACTACGTCGCTCTGGAGTGGGTGAAAGGCGAGATCGCCGAAACCCTGAAACAGGCGCGCCAGGCGCTGGAAGCGTTCGTCGAGAACCCGCAGGACCCGACCCGCATGCGGTTCTGCCTGACCTACGTGCACCA---GGTGCAGGGCACCCTGCAGATGGTCGAGTTCTACGGCGCGGCCCTGCTCGCCGAGGAAATGGAGCAGTTGGTCCAGGCCTTGCTGGACGGTCGCGTGCCGAACCAGGGCGAGGCCCTGGAAGTGCTGATGCAGGCGATCCTGCAACTGCCGGTCTACCTCGACCGGATCCAGACCGCCCGGCGCGACCTGCCGATGGTGGTCCTGCCGCTGCTCAACGACCTGCGCGCCGCGCGCGGCGAGAAGCTG…
23	ATGACCTTCGACGCCGCGTTCCAGCAGCTCGGCGAGCGGATGGCCGGCGGGGCCCTGGCGGAAACGGCGCTGGCGCCGTTCACCCATCTGCTGATCGACGAGTTCCAGGATGTCTCGCCGCAGATCGTCCTCTGGCTACAGGCGTTGCACCGCCGCCTGGCGA---CCCAGGGCACCGCGCCGAGCCTGATGGCCATCGGCGACGACTGGCAGTCGATCTACGGCTGGCGCGGCAGTTCGCCGGAGCTGTTCATCGACTTCGACCGGCACTTCCCCTCGCGTGGGCGGGGACGCAAGAGCGCGCTGCTGGTGCTGGAAACCAACTACCGCTCCGTCGAACCGATCATTCGCGACGGCGAGAAGGTGCTGGCCGGGGTGCGTTTCAAGCAGGACAAGACC…	ATGCACCTGTTGCGCACCCAACCCGGCGGCTTCGTTCCCGACGACGGCATCGCCCACCTGGCCCAGACTCCCGCCGAGCTGGTGATCCTCTGCAGCGGCGATTCGCACCTCGCATTGCTGGCCGAGGCCGCCCGTGCGCTGCCGGACGACTACCCGAGCCTGCGCCTGGCCAACCCCATGCAGTTGCAGAACCACGCCTCGGTGGACCTCTACGTCGACGAAGTGCTGCGGCACGCGCGGGTGATCCTGCTTTCGCTGCACGGCGGCATCGGCTACTGGCGCTACGGCGTGGAGCAACTGGTGGCGCTGGCCGAGCGCGGCGCGCTGCTGATCCCGGTGCCCGGCGACGACCGCCCCGACCCGGAGCTGAGCGCCCTTGGCAACCTGCCGGCGGAGCAG…	ATGTTCGAACGCATCATCCAATTCGCCATCGAGCAACGCTGGCTGGTCCTGCTGGCGGTGCTGGGGATGGCCGGGGTCGGCATCGGCAGCTACCAGAAGCTGTCCATCGACGCGGTCCCGGACATCACCAACGTCCAGGTGCAGATCAATACCGCCGCCCCCGGCTACTCGCCGCTGGAAGTGGAGCAGCGGATCACCTACCCGGTGGAGACCGTCATGGCCGGCCTGCCGGGTTTGCAGGAAACCCGTTCGCTGTCGCGGCCGGGGATTTCCCAGGTGACGGTGATCTTCGAGGAGGGCACCGACATCTACTTCGCCCGCCAGCAGGTCAACGAACGCCTGAGCACGGCGCGCGAGCAACTGCCGGAAGACATCTCGCCGACCCTCGGGCCGATCTCC…	ATGTCCTTCAACCTTTCCGCCTGGGCGTTGCAGAATCGCCAGATCGTCCTGTACCTGATGATCCTGCTTGGCGCGGTCGGCGCGCTGTCCTACAGCAAGCTGGGGCAGAGCGAAGACCCGCCGTTCACCTTCAAGGCCATGGTGGTGCAGACCAACTGGCCGGGCGCCAGCGCCGAAGAGGTGGCCCGGCAGGTCACCGAGCGTATCGAGAAGAAGCTGATGGAAACCGGCGACTACGATCGCATCGTGTCCTTCTCCCGCCCCGGCGTCTCGCAGGTGACCTTCATGGCCCGCGAGGACATCCATTCCAGCGAGATCCCCGAACTCTGGTACCAGATCCGCAAGAAGATCAGCGACATTCGCGCCACCTTGCCGCAAAGCATCCAGGGCCCGTTCTTC…	ATGCGCACCGAGCAACCGAAAGTCATCCACCTCAAGGACTATCAGGCGCCGGACTACCTGATCGACGAGACCCACCTGAAGTTCGAACTGTTCGAAGACCACAGCCTGGTACACGCCGAGCTGAAGCTGCGGCGCAACCCCGAGCGCGGCGCCGGCCTGCCGCCGCTGTTGCTGCATGGCCAGCAACTGGAGCTGCTGGCGCTCGAACTGGACGGCCAGGCGCTCGGCGCGGACGACTACCAGCTGGACGACGAGCAGCTCGGGGTGCAACCGCGGCAGGCCGAGTTCGTCCTCAGGAGCACGGTGCGTATCCATCCGGAGAGCAACACCGCGCTGGAAGGCCTGTACAAGTCCGGCAAGATGTTCTGCACCCAGTGCGAGGCCGAGGGTTTCCGCAAG…	ATGACCGATAACCTGAACCTCGGCGCCATCGACCTGGGCACCGACGACGAATTCATCGCCCGCCATATCGGCCCGCGCGCCGCCGACACCCAGGCCATGCTCCAGCGCCTGGGCTACGACTCGCTGGACGCGCTGATCGGCAACGTGATCCCGGACAGCATCAAGGGCAGCAGCGTGCTCGACCTGCCGGCCGGCATGGGCGAGGCCGAGGCGCTGGCCAGCCTGAAGGCGATCGCCGCGCGCAATCGCGCGTTGCGTTCCTTCATTGGCCAGGGCTACTACAACTGCCACACCCCGGCACCGATCCTGCGCAACCTCCTGGAGAACCCGGCCTGGTACACCGCCTACACGCCGTACCAGCCGGAAATCTCCCAGGGCCGCCTGGAGGCGCTGCTGAAC…	GCAGGTTTCCCATGACGAGCTGGTCGCTCGCCTGTCCATGGTCGGCCTCGAGGTCGACGCCGACCTGCCGGTCGCCGGCGCCTTCAGCGGCGTGGTGGTCGGCGAGGTGCTCTCGACCGAACAGCATCCGGACGCCGACAAGCTGCGCGTCTGCCAGGTCAGCAACGGCAGCGAGACCTTCCAGGTCGTCTGCGGCGCGCCCAACGTGCGCGCGGGCCTGAAGATTCCCTTCGCCATGATCGGCGCCGAACTGCCGGGCGACTTCAAGATCAAGAAAGCCAAGCTGCGTGGCGTCGAGTCCTTCGGCATGCTCTGCTCGGCCAAGGAATTGCAGATCAGCGAAGAGAACGCCGGTCTGCTCGAGCTGCCGGCCGACGCGCCGGTCGGCCAGGACGTCCG…	ATGAGCGAGAACAACACGTACGACTCTTCCAGCATCAAGGTGCTGAAGGGGCTGGATGCCGTACGCAAGCGCCCCGGCATGTACATCGGCGACACCGACGATGGCACCGGTCTGCACCACATGGTGTTCGAGGTGGTGGATAACTCCATCGACGAAGCGCTGGCCGGTTATTGCAGCGAAATCAGCATCACCATCCATACGGATGAGTCGATCACTGTCCGCGACAATGGACGCGGTATTCCGGTGGATATCCACAAGGAAGAAGGGGTTTCTGCGGCGGAAGTGATCATGACCGTCCTCCACGCCGGCGGCAAGTTCGACGACAACACCTACAAGGTGTCCGGCGGCTTGCACGGTGTGGGCGTCTCGGTGGTGAACGCGCTGTCCCATGAACTACGC…	ATGCTGATCCTGCGCGGCGCTCCCGCCCTTTCCGCTTTCCGCCACGGCAAACTGCTCGAGCAACTGACCCAGCACGTACCTGCCGTTACCGGGCTGTACGCTGAGTTAGCGCATTTCGCCGACGTCACCGGCGCGCTCACCGCCGACGAGGAGCAGGTGCTGGCGCGGCTGCTGAAATACGGCCCGAGCGTGCCGGTGCAGGAGCCCAGCGGACGGCTGTTCCTGGTGGTGCCGCGCTTCGGCACCATCTCGCCGTGGTCGAGCAAGGCCTCCGACATCGCCCGCAACTGCGGCCTGGCGAAGATCGACCGGCTGGAGCGCGGCATTGCCTACTATGTGCAGGGCGAACTGTCCGAGAGCGACGCCCAGCAGGTCGCCGCCCGCCTGCATGACCGCATG…	ATGAGTGGCCGCTCCGCTGGTTTCGCCCTGCCCAGCCGCGACGAGTGGCGGCGCGCGCTGGCCGAGTGGGCGCGCAGCGACGGGGCGACCTGGATCTACGTGTTCAAGGTGCTCTGCGCGGCCTTCCTGACCCTCTGGCTGGCGATGCGCCTGGAATTGCCGCAGCCGAGCACGGCGACCATCACCGTGTTCATCGTCATGCAGCCGCAGAGCGGCCAGGTGTTCGCCAAGAGCTTCTACCGCATCCTCGGCACCCTGGTCGGCCTCAGCGTGATGGTCACCCTGATCGCCCTGTTCGCCCAGGAGCGGGTGCTGTTCCTGCTCAGCTCGGCGATCTGGATCGGTCTCTGCACCGCCGGGGCCGCCCGCTACCGTGACTTCCGCTCCTACGCCTGCGTG…	ATGAGCGAATCCCTCGATCTGAGCCTGGAAGGGGTCGAACGCCGGTCGTTGGCCGAGTTCACCGAGCAGGCCTATCTGAACTATTCCATGTACGTGATCATGGACCGCGCCCTGCCGCATATCGGCGACGGCCTGAAACCGGTGCAGCGACGCATCGTCTACGCCATGAGCGAACTGGGGCTGGATGCCGATTCCAAGCACAAGAAGTCGGCGCGCACCGTCGGCGACGTGCTCGGCAAGTTCCACCCGCACGGCGACTCGGCCTGCTACGAGGCCATGGTGCTGATGGCGCAGCCGTTCTCCTATCTCTATCCGCTGGTGGACGGCCAGGGCAACTGGGGGGCGCCGGACGATCCCAAGTCCTTCGCCGCCATGCGTTATACCGAGGCGCGCCTGTCG…	ATGTCTTCACGCAAGATCGGGCTCAACCTGGTGGTCATCGTCGCCCTGGCCGCCCTCTTCACCGGCATCTGGGCCCTGTACAACCGTCCGGTCAGCGTACCGGACTGGCCGGAACGCATCTCCGGCTTCTCCTTCTCGCCGTTCCGCCTCAACCAGAACCCGCAGAGCGGCCGCTACCCCAGCGCCGAACAGATGCGCACCGACCTGGAACTGGTCGCCCGGCACACCCACAGCATCCGCACCTATTCGGTCCAGGGCGCGCTCGGCGACATCCCGGCGCTGGCCGAGGCGTTCGGCCTGCGCGTCAGCCTGGGCATCTGGCTCGGCCCGGACCTGGCCAGCAACGAGGCCGAGATCGCCCGCGCCATCCGCATCGCCAACGAGTCGCCGAGCGTGGTG…	ATGACCGCCATGCCCGAAGTACTTCGCGAAGATACGCTGAACATCCCCGACAGCCGTGGGCTGAATCTCTACACCTGCGATCCGGCCCTGGAGCGGCTGCTGGAGGTATACCTGCCGCCGGCGTTGCTCGCCGAATGGCGGCCGCTCCTCGAACGGCTCGGCGCCCGTGCCGGCGGCGAGCTGGACGTGCTGGCGCTGGCGGCGGACAAGAACCCGCCGGTGCTGGCGCCGCGCACCCGCCGCGGCGAGGATTTGCAGAGCATTCGCAAGCATCCGGACTACGTCGCCCTCGAACAGGTGGCCTATGCCGAACTTGGCCTGGCTTCCATGAGCCATCGCCCGGACGGCCCGCCGCCGCTGGTGAAGTATGCGCTCACCCACCTGTTCGTACAGGCCGAG…	ATGTCCGAATTCTTCATCAAGCGGCCGAACTTCGCCTGGGTGGTGGCCCTGTTCATCTCCCTGGCCGGCCTGCTGGTCATTTCCAAATTGCCGGTAGCGCAGTACCCCAATGTCGCGCCGCCACAGATCACCATCACCGCCACCTATCCCGGCGCCTCGGCGAAGGTGCTGGTGGACTCCGTCACCAGTGTGCTCGAGGAGTCGCTGAACGGCGCCAAGGGCCTGCTCTACTTCGAGTCGACCAACAACTCCAACGGCACCGCCGAGATCGTCGTCACCTTCGAGCCGGGCACCGATCCGGACCTGGCCCAGGTGGACGTGCAGAACCGCCTGAAGAAAGCCGAGGCGCGCATGCCGCAGGCGGTGCTGACCCAGGGCCTGCAGGTCGAGCAGACCAGC…	ATGAGCCAGCAGCAGATGCCCGTGGCCCTCGATCCGCTGGACTTCCCGTTGCACGGCAGCCGCCTGATCGAGGCCAGCGCCGGTACCGGCAAGACGTTCACCATCGCCCTGCTATACGTACGCCTGGTCCTCGACCATGGCGGCGAGAACGCTTTCGGCCGGCCGCTGAGCCCGCCGGAAATCCTCGTGGTGACCTTCACCGATGCGGCGACCCAGGAACTCCGCGAGCGTATCCGCAGCCGCCTGGGCGAAGCGGCGCGTTGTTTCGCCGAGCCGCAGGAGCGCCACGACGGCCTGCTGGTCGCGTTGCGCCAGCAGTATCCCGCCGAGCGCTGGCCGGGCTGCGCGCGCCTGCTGCGCCTGGCCGCGGAGTGGATGGACGAGGCCGCGGTATCGACC…	ATGAGGCGCGCCAGCCTGCATATGTTGCTCTGCCAGTTCGCCATGGCCCTGGGCCTGCTCCTGAGCCTGGGCAGCGAGGCCTGGGCCGCCAGGCCGGCTCCGCAGGCGGCCGTCGACCTGGAAGCGCCGCCCGCCCTGGCCGAGGACGCCAGCCTCGACCAGCTCAACGCGCAACTCGACCTGATCCGCCAGCGCGTTACCGCCGACGCCAGCGACGACCTCCTCGCCGAGTTGCGCCAGAGCGCGCTGCAAGTCCAGCGCCAGGCCGACGCCCTGCTCGCGCTACGGGTGGCCGACATCGAGCGGCTCGACGATCAGTTGAAAGTGATCGGCCCGCCGCAGCCCGACGAGGCGGAAAGCCTCGCCGCCCAGCGCCAGGCCCTGACCCGGCAGAAGAAC…	CTGCTGTTCGCCGCGGTGGTCATCGGCTTCCCCCAGCGCGCCGGCGAATGGTTGCTGGCCGCACAGACCTGGGCCTCGCAGACCGTCGGCTGGTACTACCTGCTGGCGATGACGCTGTACCTGATCTTCGTGGTGGTCACCGCGCTTTCCGGCTACGGCAAGATCAAGCTCGGTGCCGACCACGACGAGCCGGAATTCAGCTACCTGTCCTGGGCCGGCATGCTGTTCGCCGCCGGCATCAGCATCACCCTGTTCTTCTTTTGCGTATCCGAGCCGTTGACCCACTTCCTCCAGCCGCCGCAAGGCGAGGCCGGTACCCAGGAAGCCGCGCGGCAGGCCATGGAACTGCTGTTCCTGCACTGGGGCCTGCACGGCTGGGGCGTGTTCGCCCTGGTGGCG…	ATGGTCCAGGGCACCACCTCGGACGCTGGCAAGAGCACCCTGGTGACCGCGCTGTGCCGCTGGCTGGCCCGGCGCGGCGTCGCGGTGGTGCCGTTCAAGCCGCAGAACATGGCGCTGAACAGCGCGGTCACCGCCGACGGCGGCGAGATCGGCCGCGCCCAGGCGGTCCAGGCCCAGGCCTGCCGGCTGGCGCCGCACACCGACATGAACCCGGTGCTGCTCAAGCCGAACACCGACATCGGCGCCCAGGTGATCATCCATGGCCGCGCGGTGACCAGCATGGACGCCGCTGCCTACCACGACTACAAGCGCGTGGCGATGGAAGCGGTGCTGGCTTCCCATGGGCGGCTCGCCGCCGCCTACCGGGTGGTGATGGTGGAGGGCGCCGGCTCGCCGGCG…	ATGGCCAGCCTGTTCCTCGGCCGCAAGGAAATCGACGACGACCTGCTCGACGACATCGAGACGCGCCTGCTGACCGCCGACGTCGGCGTCGAGGCCACCACCCTGATCGTGCAGAACCTGACCAAGCGCGTGGCGCGCAAGGAGCTGGCCGACAGCGGCGCGCTGTACAAGGCGCTGCAGGAAGAGCTGGCCAGCCTGCTGCGCCCGGTGGAGCAGCCGTTGCAGGTCGACGTCGCGCGCGAGCCCTATGTGATCCTGGTGGTCGGGGTGAACGGCGTGGGCAAGACCACCACCATCGGCAAGCTGGCGAAGAAGCTGCAACTCGAGGGCAAGAAGGTCATGCTGGCCGCCGGCGACACCTTCCGCGCTGCCGCCGTGGAGCAGTTGCAGGTCTGGGGC…	TTGCGCATCGAGAACTTCGCACCCATCGACAGCCAGGGTTTCCGTTTCCTGCTCCGGCCAGGTGACGAACCTCTGCTCGCGCTCATCGATCGCGCCCTGCCGCATATTAGCGGGCGCTACGGCGACGAACTGTTGCGCAGCTGGAGCGCCGGGCGGCGCCTGCGCTTCGACGAGCCCCGGGTGACGCTGTCGCCGGCGGAGCAGCGTTGGCTCTCCGCGCACCCGGTCGTGCCGGTGGTGATCAACCATTCCCTTGGCGCGCTCGGGCAACTGGATAACGAGGGGAGGCTGAGTGGTATCGGGCGTGACTATCTGGACCTGATCGGCAAGCGCAGTGGCCTGCAGTTTTCCTTCACTGGAGCACGCAACTTCGTCGAGACGAAAAGCCGACTGGATGCG…	CGAGCCACCGCCCGCGGACGACTACTACGAAGTCGACATGGATACCCTGGCCTACCTGGATGCCGCGCCCGAGCCTGACGTGGTCGTGGTGGAGGAGCCGCTGCCGGCGGCGAAGCCGGCCACCGGCCTGGCCGCAGAGTGGCTGGAGCTGTTCCCGCGGCTCGGCCTCGGCGGCCTGACCGCCAGCATCGCTGCCAACTGTACGCTGGTAGCTGCCGACGGCGACCACTGGCATCTGCATCTCGATCCGGGCCAGAGCGCGCTGTTCAACGCCACCCAGCAGCGGCGGCTGAACGATGCGCTGAACCAGCACCTGGGGCGCACCCTCAAACTGGAGGTGACCCTGCAGAAGCCTGAGCAGGAGACCCCGGCCCAGGCAGCGGCACGCCGGCGTGCCGA…	ATGTCGCAGACGCCGTCCCTCGCCCAGCTCCAGCCCGCCGATGCCTTCCTGCGCCGCCACCTCGGCCCCGATCCGGCGGAACAGCAGGCCATGCTGGACTTCCTCGGAGTTTCCACTCGCGCCGAACTGATCGTGCAGACGGTGCCGCCGGCGATCCGCCTCAACCGGCCGCTGGAACTGCCCGCCGCGCTCGACGAACAGGCCGCCCTGGCGCGCCTGCGCGGCTACGCCGGGCTCAACCAGCGCTGGACCAGCCTGATCGGCATGGGCTACTACGGCACCGTGACGCCGCCGGTGATCCTCCGCAACGTGCTGGAGAATCCCGGCTGGTACACCGCCTATACGCCCTACCAGCCGGAAATCGCCCAGGGCCGCCTGGAAGCGCTGCTGAATTTCCAG…	GTGATCCTCGCCGACGAGCAGGAAGAGTTCGGCGGCAGCCTGCTGGACACCCGCGAGACCCTCGACGGCAAGCCCGCCGCCGAGTGGGTCGCGGACGCCGTGGCCGAGCTGCAAGGCCTGCCGGAAGTCATCCTGCTACCGCGCTCCACGGTCAACGGCTACCACGACCACAACTTCCTCACCATCCACGAGCGGCGCACCGACCACCTCGGCGAGGTCGCCCCGCTCGGCCAGGTCCGCCAGCGCGTGCACCGCGTACGCGCCAAGCGCGTGGTACTGGCCGCCGGCGCCCATGAGCGGCCGCTGGTCTACGGCAACAACGACCTGCCCGGCAACATGCTCGCCGGCGCGGTTTCCACCTATGTACGGCGCTACGGCGTGGCACCGGGCAAGAAACTG…	GTGCGCAGCTATCTCGAATGGCTGCTGGACAACCACTTCACCTTCCTCGGCTACGAGGAATTCACCGTCGCCGACGAGGCCGACGGCGGGCGCATGGTCTACGACGAGAAATCCTTCCTCGGCTTGACCCGTCTGCTGCGCGCCGGCCTGAGCAAGGATGACCTGCACATCGAGGACTATGCCGTCGCCTACCTGCGCGAACCGGTCCTGCTGTCCTTCGCCAAGGCCGCCCATCCGAGCCGCGTGCACCGCCCGGCCTACCCGGACTACGTGTCGATCCGCGAGCTGGACGGCAAGGGCCGGGTGATCCGCGAGTGCCGCTTCATGGGCCTGTTCACCTCCTCGGTGTACAACGAGAGCGTCAACGACATTCCCTTCATCCGCGGCAAGGTCGCCGAA…	GTGTACGGCGAATATTCTCGGGAAAGCATTACCTGCCTGCTCGCCATACTGTTATCCGGCCATCACTACTTATATATAGACCTGAAACAACCGGCGGCCTGGAATGCAGAGTTGTGCCGGCAGGTCGACTGCCGCCTGATCCTCGACTGCTCGACCACGCCGACGCCCGCCAACGGTCTTCCCTGCGTCCCGGTCAGGCACCTGCCTGCCGCTCCAGCCTCGGTCGCCCGGCCATGCTTCGCGGCGGACCAGATCGCCTACATCAACTTCTCCTCGGGCACCACCGGCCGCCCGAAAGCCATCGCCTGCACCCACGCCGGCATTACCCGCCTGTGCCTGGGCCAGTCGTTCCTCGCGTTCGCTCCGCAGATGCGCTTCCTGGTGAACTCGCCGCTGTCC…	CTGCTGGAAGAAGGTGCGGACGAGGTATTCGAGGAAATCCTCGCCGCCGCTACGTCCTACTTCCAGACGCCCATCGCGCTCATTTCCATCCTCGACCATCAGCGCCAGTGGTTTCGCGCGAGCATCGGCCTCGATATCCGGCAGACGCCGCGACGGGATTCGTTCTGCGCCTATGCGATCCTGGGCAAGGGAGTATTCGAGGTGGCCGACGCCACCCTCGACCCGCGCTTCCGGGGCAACCCCTATGTGCAAGGCGAACCGCGCATCCGCTTCTACGCCGGGGCTCCGTTGGCCACCGCGGAAGGTCTCAACCTCGGCAGCCTCTGCGTCATCGACCGGGAACCACGCGGGCCGCTGGCCGAGCGGGACGTCGCCATGCTCGAGCACTTCGCCCGGCTG…	ATGTCCCTGAGTGTCTTCGATCTGTTCAAGATCGGCATCGGGCCGTCCAGCTCCCACACCGTGGGGCCGATGCGTGCCGCCGCGCGCTTCGCCGAGGGGCTGAGGCGCGAGGGGTTGCTGGAGGCCACTGCCAGCGTCAAGGTCGAGCTGTACGGCTCGCTCGGCGCCACCGGCAAGGGCCACGGCAGCGACAAGGCGGTACTGCTCGGCCTGGAGGGCGAGCAGCCGGACACGGTGGATACCGCCGCGATTCCCGCTCGGCTCGATGCCATCCGTTCCAGCGGCGAGCTGCGCCTGCTCGGCGAGCGGCCGATCCGCTTCGTCGAGAAGGAACACCTTGCGCTGATCCGCAAGCCGCTGGCCTACCATCCCAATGGCATGATCTTCCGTGCCTTCGAC…	ATGAACAGAGTTTTCCTGACCCCGGCAGCCGTGGCGCTGTGCGGCGCGTCTTCCCTGAGCCTGGCCGAACCGGTCAGCCTTGCCGACCAGGTGGTGACCGCCACCCGTACCGCCCAGACCGCTTCCCAGAGCCTGGCGGCGGTGAGCGTCATCGACCGCGAGGATATCGAGCGCAGCCAGGCGCGCAGCGTGCCGGAGCTGTTGCGCCAGGTACCCGGCGTGTCGCTGGCGAACAACGGCGGTTTCGGCAAGAACACCACGCTGTTCCTGCGCGGCACCGAGTCCGACCATGTGCTGGTGCTGATCGACGGCATCAAGGTCGGCTCGGCCAGCGCCGGCCTCACCGCGTTCCAGGATTTGCCGGTGGAGCTGATCGAGCGCATCGAGGTGGTCCGCGGG…	GTGCGGGTGCTCAACTGGAGCTGGGGCATCCACCGCGTCGGCGCTCGCGACGTCGATGGCGACGAGGTGGATTCGCTGGTGCGCTCGGGGATCGCCATGAGCGGCTACGAGGAGTTGCTCGAGGAGTTCTTCCTCTGGCTGCGCAAGGAGCATCCGGACGTGCTGGTGGTCAACTCCGCCGGCAACGGCTCGTCCTACTCCGGTACCGACGAATACCGCCTGCCGTCCTCCTTCGTCACCGAGCAGTTGCTGGTGGTGGGCGGCCACCAGCGCAGCGAGCGCCAAGGCCTGGCGGTGGACGACCCGGCCTACGCGGTCAAGCGCAGCACCTCGAACGTCGACATGCGGGTGGATGTCACCGCCGCCGCCTGTACCCATGCCTCGACCCTGGAGCGGGAC…	TTGCAGGCAGCTTGCGCGTTCGGCCCGCCCGGGCGGCTATTCCGCGCCTGCGACGAGCAAGGACGCGAGGCGTTGCTGCTGCTCGCGGCGGTCGATGCCGACGAAGCGTTCTGGCAGCGCGAATGGGCATTGCGGCGCTGCCGTGCGGAGAGCCTGCCGCGAGTATTGTCGTCGCCCCGGTTGCGTCGTCATGCCTTCCAGTTGTTCGCTCCGCCGCGCTGGCCGATGCGCAGCCTGCTGGATTGGGCGCCAGCGCACCTGCCGCTGGAACCGCAATGCGCGCTGGTCCTCCTGGAGCAACTTATCGATGCGGTTCGCGCCTTGCAGCGGCGCGGCGTACAGGGCTTGTGGCTGGCGCCGCGGCAGATCCTGCTGGACGAGGGCGGGCGCCTGCTGTTC…	ATGTTCAACCCGGCCAACCAGACCCACTTCAGCCTCAGCCTCGACGGCCTCCGCCATGACCTGCAGGTCCTCGCCTTCAACGGCCACGAAGGCATCAGTCGCCCCTACCGTTTCGAACTCGAACTGGTCGGAGAGCGCGCCGGCCTCGACCTCGAAACGTTCCTCCACCGGCCCGCCTTCCTCGCCTTCACCCCGCAGGGCCAGGGTGTCCACGGCCTGGTCTACGGCGCTGCCCAGGGCGATGCCGGCAAGCGCCTGACCTGCTATCGCCTCACCCTCGTCCCGCACCTGGCCTACCTCGCCCAGCGCAACAACCAGCGGATCTTCCAGCACCTCACGGTGCCGCAGATCGTCGCCCTGGTCCTCGAGGAGCACGGCATCCTCGCCGACGCCTACCGC…	GTGGCTCTCCATCGCCTGGCCTTTATCTTCCTGTGCCTGCCGCTCATGGCCAGCGCCGCCCCCTTCACCTCCCCCGGCGACCGCGACCTGATCCGCGACCGCCAGCAGCGCCTGCTGGACGAACAGCGCAAGCGCCTGGAGGAACTCCAGCAACTGCCCGGCAAGGGAGCGCCCGCCGCTGCGGATGCCTCCGGCGACGACGAGCGCTGCTTCGAGATCCGCCGCATCGAGCTGGAGGGCGCCGGGCACCTCGGCGAAAGCGCGCGTCGCCAACTGCTGGCGCCCTACCAGGGACGCTGCCTGGGCGTCGGCCAGCTCAATGCGCTGCTCAAGGCCGTCACCGACCATTACCTGGATCGCGGCTACGTCACCACCCGCGCCTACCTGCCACAGCAGGAC…	ATGGGTGACCGGCACGACTACGTCGCTCTGGAATGGGTGAAAGGCGAGATCGCCGAAACCCTGAAACAGGCGCGCCAGGCGCTGGAAGCGTTCGTCGAGAACCCGCAGGACCCGACCCGCATGCGGTTCTGCCTGACCTACGTGCACCA---GGTGCAGGGCACCCTGCAGATGGTCGAGTTCTACGGCGCGGCCCTGCTCGCCGAGGAAATGGAGCAGTTGGTCCAGGCCTTGCTGGACGGTCGCGTGCCGAACCAGGGCGAGGCCCTGGAAGTGCTGATGCAGGCGATCCTGCAACTGCCGGTCTACCTCGACCGGATCCAGACCGCCCGGCGCGACCTGCCGATGGTGGTCCTGCCGCTGCTCAACGACCTGCGCGCCGCGCGCGGCGAGAAGCTG…
24	ATGACCTTCGACGCCGCGTTCCAGCAGCTCGGCGAGCGGATGGCCGGCGGGGCCCTGGCGGAAACGGCGCTGGCGCCGTTCACCCATCTGCTGATCGACGAGTTCCAGGATGTCTCGCCGCAGATCGTCCTCTGGCTACAGGCGTTGCACCGTCGCCTGGCAA---CCCAGGGCACCGCGCCGAGCCTGATGGCCATCGGCGACGACTGGCAATCGATCTACGGCTGGCGCGGCAGTTCGCCGGAGCTGTTCATCGACTTCGACCGGCATTTCCCTTCGCGTGGGCGGGGACGCAAGAGCGCGCTGCTGGTGCTGGAAACCAACTACCGCTCCGTCGAACCGATCATTCGCGACGGCGAGAAGGTGCTGGCCGGGGTGCGTTTCAAGCAGGACAAGACC…	ATGCACCTGTTGCGCACCCAACCTGGCGGCTTCGTTCCCGACGACGGCATCGCCCACCTGGCCCAGACTCCCGCCGAGCTGGTGATCCTCTGCAGCGGCGATTCGCACCTGGCATTGCTGGCCGAGGCCGCCCGTGCGCTGCCGGACGACTACCCGAGCCTGCGCCTGGCCAACCCCATGCAGTTGCAGAACCACGCCTCGGTGGACCTCTACGTCGAGGAAGTGCTGCGGCACGCACGGGTGATCCTGCTTTCGCTGCACGGCGGCATCGGCTACTGGCGCTACGGCGTGGAGCAACTGGTGGCGCTGGCCGAGCGCGGCGCGCTGCTGATCCCGGTGCCCGGCGACGACCGCCCCGACCCGGAGCTGAGCGCCCTCGGCAACCTGCCGGCGGAGCAG…	ATGTTCGAACGCATCATCCAATTCGCCATCGAGCAACGCTGGCTGGTCCTGCTGGCGGTGCTGGGGATGGCCGGGGTCGGCATCGGCAGCTACCAGAGGCTGTCCATCGACGCGGTCCCGGACATCACCAACGTCCAGGTGCAGATCAATACCGCCGCCCCCGGCTACTCGCCGCTGGAAGTGGAGCAGCGGATCACCTACCCGGTGGAGACCGTCATGGCCGGCCTGCCGGGTTTGCAGGAAACCCGTTCGCTGTCGCGGCCGGGGATTTCCCAGGTGACGGTGATCTTCGAGGAAGGCACCGACATCTACTTCGCCCGCCAGCAGGTCAACGAACGCCTGAGCACGGCGCGCGAGCAACTGCCGGAAGACATCTCGCCGACCCTCGGGCCGATCTCC…	ATGTCCTTCAACCTTTCCGCCTGGGCGTTGCAGAATCGCCAGATCGTCCTGTACCTGATGATCCTGCTTGGCGCGGTCGGCGCGCTGTCCTACAGCAAGCTGGGGCAGAGCGAAGACCCGCCGTTCACCTTCAAGGCCATGGTGGTGCAGACCAACTGGCCGGGTGCCAGCGCCGAAGAAGTGGCCCGGCAGGTCACCGAGCGTATCGAGAAGAAGCTGATGGAAACCGGCGACTACGATCGCATCGTGTCCTTCTCCCGCCCCGGCGTCTCGCAGGTGACCTTCATGGCCCGCGAGGACATCCATTCCAGCGAGATCCCCGAACTCTGGTACCAGATCCGCAAGAAGATCAGCGACATTCGCGCCACCTTGCCGCAAAGCATCCAGGGCCCGTTCTTC…	ATGCGCACCGAGCAACCGAAAGTCATCCACCTCAAGGACTATCAGGCGCCGGACTACCTGATCGACGAGACCCACCTGAAGTTCGAACTGTTCGAAGACCACAGCCTGGTACACGCCGAGTTGAAGCTGCGGCGCAACCCCGAGCGCGGCGCCGGCCTGCCGCCGCTGTTGCTGCATGGCCAGCAACTGGAGCTGCTGGCGCTCGAACTGGACGGCCAGGCGCTCGGCGCGGACGACTACCAACTGGACGACGAGCAGCTCGGGGTGCAACCGCGGCAGGCCGAATTCGTCCTCAGGAGCACGGTGCGTATCCATCCGGAGAGCAACACCGCGCTGGAAGGCCTGTACAAGTCCGGCAAGATGTTCTGCACCCAGTGCGAGGCCGAGGGTTTCCGCAAG…	ATGACCGATAACCTGAACCTCGGCGCCATCGACCTGGGCACCGACGACGAATTCATCGCCCGCCATATCGGCCCGCGTGCCGCCGACACCCAGGCCATGCTCCAGCGCCTGGGCTACGACTCGCTGGACACGCTGATCGGCAACGTGATCCCGGACAGCATCAAGGGCAGCAGCGTGCTCGACCTGCCGGCCGGCATGGGCGAGGCCGAGGCGCTGGCCAGCCTGAAGGCCATCGCCGCGCGCAATCGCGCGTTGCGTTCCTTCATCGGCCAGGGCTACTACAACTGCCACACCCCGGCGCCGATCCTGCGCAACCTCCTGGAGAACCCGGCCTGGTACACCGCCTACACGCCGTACCAGCCGGAAATCTCCCAGGGCCGCCTGGAGGCGCTGCTGAAC…	GCAGGTTTCCCATGACGAGCTGGTCGCTCGCCTGTCCATGGTCGGCCTCGAGGTCGACGCCGACCTGCCGGTCGCCGGCGCCTTCAGCGGCGTGGTGGTCGGCGAGGTGCTCTCGACCGAACAGCATCCGGACGCCGACAAGCTGCGCGTCTGCCAGGTCAGCAACGGCAGCGAGACCTTCCAGGTCGTCTGCGGCGCGCCCAACGTGCGCGCGGGCCTGAAGATTCCCTTCGCCATGATCGGCGCCGAACTGCCGGGCGACTTCAAGATCAAGAAAGCCAAGCTGCGTGGCGTCGAGTCCTTCGGCATGCTCTGCTCGGCCAAGGAATTGCAGATCAGCGAAGAGAACGCCGGTCTGCTCGAGCTGCCGGCCGACGCGCCGGTCGGCCAGGACGTCCG…	ATGAGCGAGAACAACACGTACGACTCTTCCAGCATCAAGGTGCTGAAGGGGCTGGATGCCGTACGCAAGCGCCCCGGCATGTACATCGGCGACACCGACGATGGCACCGGTCTGCACCACATGGTGTTCGAGGTGGTGGATAACTCCATCGACGAAGCGCTGGCCGGTTACTGCAGCGAAATCAGCATCACCATCCATACGGATGAGTCGATCACTGTCCGCGACAATGGACGCGGTATTCCGGTGGATATCCACAAGGAAGAAGGGGTTTCTGCGGCGGAAGTGATCATGACCGTCCTCCACGCCGGCGGCAAGTTCGACGACAACACCTACAAGGTGTCCGGCGGCTTGCACGGTGTGGGCGTCTCGGTGGTGAACGCGCTGTCCCATGAACTACGC…	ATGCTGATCCTGCGCGGCGCTCCCGCCCTTTCCGCTTTCCGCCACGGCAAACTGCTCGAGCAACTGACCCAGCACGTACCTGCCGTTACCGGGCTGTACGCTGAGTTCGCGCATTTCGCCGACGTCACCGGCGCGCTCACCGCCGACGAGGAGCAGGTGCTGGCGCGGCTGCTGAAATACGGCCCGAGCGTGCCGGTGCAGGAGCCCAGCGGCCGGCTGTTCCTGGTGGTGCCGCGCTTCGGCACCATCTCGCCGTGGTCGAGCAAGGCCTCCGACATCGCCCGCAACTGCGGCCTGGCGAAGATCGACCGGCTGGAGCGCGGCATTGCCTACTATGTGCAGGGCGAACTGTCCGAGAGCGACGCCCAGCAGGTCGCCGCCCGCCTGCATGACCGCATG…	ATGAGTGGCCGCTCCGCTGGTTTCGCCCTGCCCAGCCGCGACGAGTGGCGGCGCGCGCTGGCCGAGTGGGCGCGCAGCGACGGGGCGACCTGGATCTACGTGTTCAAGGTGCTCTGCGCGGCCTTCCTGACCCTCTGGCTGGCGATGCGTCTGGAATTGCCGCAGCCGAGCACGGCGACCATCACCGTGTTCATCGTCATGCAGCCGCAGAGCGGCCAGGTGTTCGCCAAGAGCTTCTACCGCATCCTCGGCACCCTGGTCGGCCTCAGCGTGATGGTCACCCTGATCGCCCTGTTCGCCCAGGAGCGAGTGCTGTTCCTGCTCAGCTCGGCGATCTGGATCGGCCTCTGCACCGCCGGGGCCGCCCGCTACCGTGACTTCCGCTCCTACGCCTGCGTG…	ATGAGCGAATCCCTCGATCTGAGCCTGGAAGGGGTCGAACGCCGGTCGTTGGCCGAGTTCACCGAGCAGGCCTATCTGAACTATTCCATGTACGTGATCATGGACCGCGCCCTGCCGCATATCGGCGACGGCCTGAAACCGGTGCAGCGACGCATCGTCTACGCCATGAGCGAACTGGGGCTGGATGCCGATTCCAAGCACAAGAAGTCGGCGCGCACCGTCGGCGACGTGCTCGGCAAGTTCCACCCGCACGGCGACTTGGCCTGCTACGAGGCCATGGTGCTGATGGCGCAGCCGTTCTCCTATCGCTATCCGCTGGTGGACGGCCAGGGCAACTGGGGGGCGCCGGACGATCCCAAGTCCTTCGCCGCCATGCGTTATACCGAGGCGCGCCTGTCG…	ATGTCTTCACGCAAGATCGGGCTCAACCTGGTGGTCATCGTCGCCCTGGCCGCCCTCTTCACCGGCATCTGGGCCCTGTACAACCGTCCGGTCAGCGTACCGGACTGGCCGGAACGCATCTCCGGCTTCTCCTTCTCGCCGTTCCGCCTCAACCAGAACCCGCAGAGCGGCCGCTACCCCAGCGCCGAACAGATGCGCACCGACCTGGAACTGGTCGCCCGGCACACCCACAGCATCCGCACCTATTCGGTCCAGGGCGCGCTCGGCGACATCCCGGCGCTGGCCGAGGCGTTCGGCCTGCGCGTCAGCCTGGGCATCTGGCTCGGCCCGGACCTGGCCAGCAACGAGGCCGAGATCGCCCGCGCCATCCGCATCGCCAACGAGTCGCCGAGCGTGGTG…	ATGACCGCCATGCCCGAAGTACTTCGCGAAGATACGCTGAACATCCCCGACAGCCGTGGGCTGAATCTCTACACCTGCGATCCGGCCCTGGAGCGGCTGCTGGAGGTATACCTGCCGCCGGCGTTGCTCGCCGAATGGCGGCCGCTCCTCGAACGGCTCGGCGCCCGTGCCGGCGGCGAGCTGGACGTGCTGGCGCTGGCGGCGGACAAGAACCCGCCGGTGCTGGCGCCGCGCACCCGCCGCGGCGAGGATTTGCAGAGCATTCGCAAGCATCCGGACTACGTCGCCCTCGAACAGGTGGCCTATGCCGAACTTGGCCTGGCTTCCATGAGCCATCGCCCGGACGGCCCGCCGCCGCTGGTGAAGTATGCGCTCACCCACCTGTTCGTACAGGCCGAG…	ATGTCCGAATTCTTCATCAAGCGGCCGAACTTCGCCTGGGTGGTGGCCCTGTTCATCTCCCTGGCCGGCCTGCTGGTCATTTCCAAATTGCCGGTAGCGCAGTACCCCAATGTCGCGCCGCCACAGATCACCATCACCGCCACCTATCCCGGCGCCTCGGCGAAGGTGCTGGTGGACTCCGTCACCAGTGTGCTTGAGGAGTCGCTGAACGGCGCCAAGGGCCTGCTCTACTTCGAGTCGACCAACAACTCCAACGGCACCGCCGAGATCGTCGTCACCTTCGAGCCGGGCACCGATCCGGACCTGGCCCAGGTGGACGTGCAGAACCGCCTGAAGAAAGCCGAGGCGCGCATGCCGCAGGCGGTGCTGACCCAGGGCCTGCAGGTCGAGCAGACCAGC…	ATGAGCCAGCAGCAGATGCCCGTGGCCCTCGATCCGCTGGACTTCCCGTTGCACGGCAGCCGCCTGATCGAGGCCAGCGCCGGTACCGGCAAGACGTTCACCATCGCCCTGCTATACGTACGCCTGGTCCTCGACCATGGCGGCGAGAACGCTTTCGGCCGGCCGCTGAGCCCGCCGGAAATCCTCGTGGTGACCTTCACCGATGCGGCGACCCAGGAACTCCGCGAGCGTATCCGCAGCCGCCTGGGCGAAGCGGCGCGTTGTTTCGCCGAGCCGCAGGAGCGCCACGACGGCCTGCTGGTCGCGTTGCGCCAGCAGTATCCCGCCGAGCGCTGGCCGGGCTGCGCGCGCCTGCTGCGCCTGGCCGCGGAGTGGATGGACGAGGCCGCGGTATCGACC…	ATGAGGCGCGCCAGCCTGCATATGTTGCTCTGCCAGTTCGCCATGGCCCTGGGCCTGCTCCTGAGCCTGGGCAGCGAGGCCTGGGCCGCCAGGCCGGCTCCGCAGGCGGCCGTCGACCTGGAAGCGCCGCCCGCCCTGGCCGAGGACGCCAGCCTCGACCAACTCAACGCGCAACTCGACCTGATCCGCCAGCGCGTCACCGCCGACGCCAGCGACGACCTCCTCGCCGAGTTGCGCCAGAGCGCGCTGCAAGTCCAGCGCCAGGCCGACGCCCTGCTCGCGCTACGGGTGGCCGACATCGAGCGGCTCGACGATCAGTTGAAAGTGATCGGCCCGCCGCAGCCCGACGAGGCGGAAAGCCTCGCCGCCCAGCGCCAGGCCCTGACCCGGCAGAAGAAC…	CTGCTGTTCGCCGCAGTGGTCATCGGCTTCCCCCAGCGCGCCGGCGAATGGCTGCTGGCCGCGCAGACCTGGGCCTCGCAGACCGTCGGCTGGTACTACCTGCTGGCGATGACGCTGTACCTGATCTTCGTGGTGGTCACCGCGCTTTCCGGCTACGGCAAGATCAAGCTCGGTGCCGACCACGACGAGCCGGAATTCAGCTACCTGTCCTGGGCCGGCATGCTGTTCGCCGCCGGCATCAGCATCACCCTGTTCTTCTTCTGCGTATCCGAACCGCTGACCCACTTCCTCCAGCCGCCGCAAGGCGAGGCCGGTACCCAGGAAGCCGCGCGGCAGGCCATGGAACTGCTGTTCCTGCACTGGGGCCTGCACGGCTGGGGCGTATTCGCCCTGGTGGCG…	ATGGTCCAGGGCACCACCTCGGACGCCGGCAAGAGCACCCTGGTGACCGCGCTGTGCCGCTGGCTGGCCCGGCGCGGCGTCGCGGTGGTGCCGTTCAAGCCGCAGAACATGGCGCTGAACAGCGCGGTCACCGCCGACGGCGGCGAGATCGGCCGCGCCCAGGCGGTCCAGGCCCAGGCCTGCCGGCTGGCGCCGCACACCGACATGAACCCGGTGCTGCTCAAGCCGAACACCGACATCGGCGCCCAGGTGATCATCCATGGCCGCGCGGTGACCAGCATGGACGCCGCCGCCTACCACGACTACAAGCGCGTGGCGATGGAAGCGGTGCTGGCTTCCCATGGGCGGCTCGCCGCCGCCTACCGGGTGGTGATGGTGGAGGGCGCCGGCTCGCCGGCG…	ATGGCCAGCCTGTTCCTCGGCCGCAAGGAAATCGACGACGACCTGCTCGACGACATCGAGACGCGCCTGCTGACCGCCGACGTCGGCGTCGAGGCCACCACCCTGATCGTGCAGAACCTGACCAAGCGCGTGGCGCGCAAGGAGCTGGCCGACAGCGGCGCGCTGTACAAGGCGCTGCAGGAAGAGCTGGCCAGCCTGCTGCGCCCGGTGGAGCAGCCGTTGCAGGTCGACGTCGCGCGCGAGCCCTATGTGATCCTGGTGGTCGGGGTGAACGGCGTGGGCAAGACCACCACCATCGGCAAGCTGGCGAAGAAGCTGCAACTCGAGGGCAAGAAGGTCATGCTGGCCGCCGGCGACACCTTCCGCGCCGCCGCCGTGGAGCAGTTGCAGGTCTGGGGC…	TTGCGCATCGAGAACTTCGCACCCATCGACAGCCAGGGTTTCCGTTTCCTGCTCCGGCCAGGTGACGAACCTCTGCTCGCGCTCATCGATCGCGCCCTGCCGCATATTGGCGGGCGCTACGGCGACGAACTGTTGCGCAGCTGGAGCGCCGGGCGGCGCCTGCGCTTCGACGAGCCCCGGGTGACGCTGTCGCCGGCGGAGCAGCGTTGGCTCTCCGCGCACCCGGTCGTGCCGGTGGTGATCAACCATTCCCTTGGCGCGCTCGGGCAACTGGATAACGAGGGGAGGCTGAGTGGTATCGGGCGTGACTATCTGGACCTGATCGGCAAGCGCAGTGGCCTGCGGTTTTCCTTCACTGGAGCACGCAACTTCGTCGAGACGAAAAGTCGACTGGATGCG…	CGAGCCACCGCCCGCGGACGACTACTACGAAGTCGACATGGATACCCTGGCCTACCTGGATGCCGCGCCCGAGCCTGACGTGGTCGTGGTGGAGGAGCCGCTGCCGGCGGCGAAGCCGGCCACCGGCCTGGCCGCGGAGTGGCTGGAGCTGTTCCCGCGGCTCGGCCTCGGCGGCCTGACCGCCAGCATCGCTGCCAACTGTACGCTGGTAGCTGCCGACGACGACCACTGGCATCTGCATCTCGATCCGGGCCAGAGCGCGCTGTTCAACGCCACCCAGCAGCGGCGGCTGAACGATGCGCTGAACCAGCACCTGGGGCGCACCCTCAAACTGGAGGTGACCCTGCAGAAGCCTGAGCAGGAGACCCCGGCCCAGGCAGCGGCACGCCGGCGTGCCGA…	ATGTCGCAGACGCCGTCCCTCGACCAGCTCCAGCCCGCCGATGCCTTCCTGCGCCGCCACCTCGGCCCCGATCCGGCGGAACAGCAGGCCATGCTGGACTTCCTCGGAGTTTCCACTCGCGCCGAACTGATCGTGCAGACGGTGCCGCCGGCGATCCGCCTCAACCGGCCGCTGGAACTGCCCGCCGCGCTCGACGAACAGGCCGCCCTGGCGCGCCTGCGCGGCTACGCCGGGCTCAACCAGCGCTGGACCAGCCTGATCGGCATGGGCTACTACGGCACCGTGACGCCGTCGGTGATCCTCCGCAACGTGCTGGAGAATCCCGGCTGGTACACCGCCTATACGCCCTACCAGCCGGAAATCGCCCAGGGCCGCCTGGAAGCGCTGCTGAATTTCCAG…	GTGATTCTCGCCGACGAGCAGGAAGAGTTCGGCGGCAGCCTGCTGGACACCCGCGAGACCCTCGACGGCAAGCCCGCCGCCGAGTGGGTCGCGGACGCCGTGGCCGAGCTGCAAGGCCTGCCGGAAGTCATCCTGCTACCGCGCTCCACGGTCAACGGCTACCACGACCACAACTTCCTCACCATCCACGAGCGGCGCACCGACCACCTCGGCGAGGTCGCCCCGCTCGGCCAGGTCCGCCAGCGCGTGCACCGCGTGCGCGCCAAGCGCGTGGTACTGGCCGCCGGCGCCCATGAGCGGCCGCTGGTCTACGGCAACAACGACCTGCCCGGCAACATGCTCGCCGGCGCGGTTTCCACCTATGTACGGCGCTACGGCGTGGCACCGGGCAAGAAACTG…	GTACGCAGCTATCTCGAATGGCTGCTGGACAACCACTTCACCTTCCTCGGCTACGAGGAATTCAGCGTCGCCGACGAGGCCGACGGCGGGCGCATGGTCTACGACGAGAAATCCTTCCTCGGCCTGACCCGTCTGCTGCGTGCCGGCCTGAGCAAGGATGACCTGCACATCGAGGACTATGCCGTCGCCTACCTGCGCGAACCGGTCCTGCTGTCCTTCGCCAAGGCTGCCCATCCGAGCCGTGTGCACCGCCCGGCCTACCCGGACTACGTGTCGATCCGCGAGCTGGACGGCAAGGGCCGGGTGATCCGCGAGTGCCGCTTCATGGGCCTGTTCACCTCCTCGGTGTACAACGAGAGCGTCAACGACATCCCCTTCATCCGCGGCAAGGTCGCCGAA…	GTGTACGGCGAATATTCTCGGGAAAGCATTACCTGCCTGCTCGCCATACTGTTATCCGGCCATCACTACTTATATATAGACTTGAAACAACCGGCGGCCTGGAATGCAGAGTTGTGCCGGCAGGTCGACTGCCGCCTGATCCTCGACTGCTCGACCACGCCGACGCCCGCCAACGGTCTTCCCTGCGTCCCGGTCAGGCACCTGCCTGCCGCTCCAGCCTCGGTCGCCCGGCCATGCTTCGCGGCGGACCAGATCGCCTACATCAACTTCTCCTCGGGCACCACCGGCCGCCCGAAAGCCATCGCCTGCACCCACGCCGGCATTACCCGTCTGTGCCTGGGCCAGTCGTTCCTCGCGTTCGCTCCGCAGATGCGCTTCCTGGTGAACTCGCCGCTGTCC…	CTGCTGGAAGAAGGTGCGGACGAGGTATTCGAGGAAATCCTCGCCGCCGCTACGTCCTACTTCCAGACGCCCATCGCGCTCATTTCCATCCTCGACCATCAGCGCCAGTGGTTTCGCGCGAGCATCGGCCTCGATATCCGGCAGACGCCGCGACGGGATTCGTTCTGCGCCTATGCGATCCTGGGCAAGGGAGTATTCGAGGTGGCCGACGCCACCCTCGACCCGCGCTTCCGGGACAACCCCTATGTGCAAGGCGAACCGCGCATCCGCTTCTACGCCGGGGCTCCGCTGGCCACCGCGGAAGGTCTCAACCTCGGCAGCCTCTGCGTCATCGACCGGGAACCACGCGGGCCGCTGACCGAGCGGGACGTCGCCATGCTCGAGCACTTCGCCCGGCTG…	ATGTCCCTGAGTGTCTTCGATCTGTTCAAGATCGGCATAGGGCCGTCCAGCTCCCACACCGTGGGGCCGATGCGTGCCGCCGCGCGCTTTGCCGAGGGGCTGAGGCGCGAGGGGTTGCTGGAGGCCACTGCCAGCGTCAAGGTCGAGCTGTACGGCTCGCTCGGCGCCACCGGCAAGGGCCACGGCAGCGACAAGGCGGTACTGCTCGGCCTGGAGGGCGAGCAGCCGGACACGGTGGATACCGCCGCGATTCCCGCTCGGCTCGATGCCATCCGTTCCAGCGGCGAGCTGCGCCTGCTCGGCGAGCGGCCGATCCGCTTCGTCGAGAAGGAACACCTTGCGCTGATCCGCAAGCCGCTGGCCTACCATCCCAATGGCATGATCTTCCGTGCCTTCGAC…	ATGAACAGAGTTTTCCTGACCCCGGCAGCCGTGGCGCTGTGCGGCGCGTCTTCCCTGAGCCTGGCCGAACCGGTCAGCCTTGCCGACCAGGTGGTGACCGCCACCCGTACCGCCCAGACCGCTTCCCAGAGCCTGGCGGCGGTGAGCGTCATCGACCGCGAGGATATCGAGCGCAGCCAGGCGCGCAGCGTGCCGGAGCTGTTGCGCCAGGTACCCGGCGTGTCGCTGGCGAACAACGGCGGTTTCGGCAAGAACACCACGCTGTTCCTGCGCGGCACCGAGTCCGACCATGTGCTGGTGCTGATCGACGGCATCAAGGTCGGCTCGGCCAGCGCCGGCCTCACCGCGTTCCAGGACTTGCCGGTGGAGCTGATCGAGCGCATCGAGGTGGTCCGCGGG…	GTGCGGGTGCTCAACTGGAGCTGGGGCATCCACCGCGTCGGCGCTCGCGACGTCGATGGCGACGAGGTGGATTCGCTGGTGCGCTCGGGGATTGCCATGAGCGGCTACGAGGAGTTGCTCGAGGAGTTCTTCCTCTGGCTGCGCAAGGAGCATCCGGACGTGCTGGTGGTCAACTCCGCCGGCAACGGCTCGTCCTACTCCGGTACCGACGAATACCGCCTGCCGTCCTCCTTCGTCACCGAGCAGTTGCTGGTGGTGGGCGGCCACCAGCGCAGCGAGCGCCAAGGCCTGGCGGTGGACGACCCGGCCTACGCGGTCAAGCGCAGCACCTCGAACGTCGACATGCGGGTGGATGTCACCGCCGCCGCCTGTACCCATGCCTCGACCCTGGAGCGGGAC…	TTGCAGGCGGCTTGCGCGTTCGGCCCACCCGGGCGGCTGTTCCGCGCCTGCGACGAGCAAGGACGCGAGGCGTTGCTGCTGCTCGCGGCGGCCGATGCCGACGAAGCGTTCTGGCAGCGCGAATGGGCACTGCGGCGCTGCCGTGCGGAGAGCCTGCCGCGAGTATTGTCGTCGCCCCGGTTGCGTCGTCATGCCTTCCAGTTGTTCGCTCCGCCGCGCTGGCCGATGCGCAGCCTGCTGGATTGGGCGCCAGCGCACCTGCCGCTGGAACCGCAATGCGCGCTGGTCCTCCTGGAACAACTTATCGATGCGGTTCGCGCCTTGCAGCGGCGCGGTGTACAGGGCTTGTGGCTGGCGCCGCGGCAGATCCTGCTGGACGAGGGCGGGCGCCTGCTGTTC…	ATGTTCAACCCGGCCAACCAGACCCACTTCAGCCTCACCCTCGACGGCCTCCGCCACGACCTGCAGGTCCTCGCCTTCAACGGCCACGAAGGCATCAGTCGCCCCTACCGTTTCGAACTCGAACTGGTCGGAGAGCGCGCCGGCCTTGACCTCGAAACGTTCCTCCACCGGCCCGCCTTCCTCGCCTTCACCCCGCAGGGCCAGGGTGTCCACGGCCTGGTCTACGGCGCTGCCCAGGGCGATGCCGGCAAGCGCCTGACCCGCTATCGCCTCACCCTCGTCCCGCACCTGGCCTACCTCGCCCAGCGCAACAACCAGCGGATCTTCCAGCACCTCACGGTGCCGCAGATCGTCGCCCTGGTCCTCGAGGAGCACGGCATCCTCGCCGACGCCTACCGC…	GTGGCTCTCCATCGCCTGGCCTTTATCTTCCTGTGCCTGCCGCTCATGGCCAGCGCCGCCCCCTTCACCTCCCCCGGCGACCGCGACCTGATCCGCGACCGCCAGCAGCGCCTGCTGGACGAACAGCGCAAGCGCCTGGAGGAACTCCAGCAACTGCCCGGCAAGGGAGCGCCCGCCGCTGCGGATGCCTCCGGCGGCGACGAGCGCTGCTTCGAGATCCGCCGCATCGAGCTGGAAGGCGCCGGGCACCTCGGCGAAAGCGCGCGTCGCCAACTGCTGGCGCCCTACCAGGGGCGCTGCCTGGGCGTCGGCCAGCTCAATGCGCTGCTCAAGGCCGTCACCGACCATTACCTGGATCGCGGCTACGTCACCACCCGTGCCTACCTGCCACAGCAGGAC…	ATGGGTGACCGGCACGACTACGTCGCTCTGGAGTGGGTGAAAGGCGAGATCGCCGAAACCCTGAAACAGGCGCGCCAGGCGCTGGAAGCGTTCGTCGAGAACCCGCAGGACCCGACCCGCATGCGGTTCTGCCTGACCTACGTGCACCA---GGTGCAGGGCACCCTGCAGATGGTCGAGTTCTACGGCGCGGCCCTGCTCGCCGAGGAAATGGAGCAGTTGGTCCAGGCCTTGCTGGACGGTCGCGTGCCGAACCAGGGCGAGGCCCTGGAAGTGCTGATGCAGGCGATCCTGCAACTGCCGGTCTACCTCGACCGGATCCAGACCGCCCGGCGCGACCTGCCGATGGTGGTCCTGCCGCTGCTCAACGACCTGCGCGCCGCGCGCGGCGAGAAGCTG…
25	ATGACCTTCGACGCCGCGTTCCAGCAGCTCGGCGAGCGGATGGCCGGCGGGGCCCTGGCGGAAACGGCGCTGGCGCCGTTCACCCATCTGCTGATCGACGAGTTCCAGGATGTCTCGCCGCAGATCGTCCTCTGGCTACAGGCGTTGCACCGCCGCCTGGCGA---ACCAGGGCACCGCGCCGAGCCTGATGGCCATCGGCGACGACTGGCAGTCGATCTACGGCTGGCGCGGCAGTTCGCCGGAGCTGTTCATCGACTTCGACCGGCACTTCCCCTCGCGTGGGCGGGGACGCAAGAGCGCGCTGCTGGTGCTGGAAACCAACTACCGCTCCGTCGAACCGATCATTCGCGACGGCGAGAAGGTGCTGGCCGGGGTGCGTTTCAAGCAGGACAAGACC…	ATGCACCTGTTGCGCACCCAACCCGGCGGCTTCGTTCCCGACGACGGCATCGCCCACCTGGCCCAGACTCCCGCCGAGCTGGTGATCCTCTGCAGCGGCGATTCGCACCTCGCATTGCTGGCCGAGGCCGCCCGTGCGCTGCCGGACGACTACCCGAGCCTGCGCCTGGCCAACCCCATGCAGTTGCAGAACCACGCCTCGGTGGACCTCTACGTCGAGGAAGTGCTGCGGCACGCGCGGGTGATCCTGCTTTCGCTGCACGGCGGCATCGGCTACTGGCGCTACGGTGTGGAGCAACTGGTGGCGCTGGCCGAGCGCGGCGCGCTGCTGATCCCGGTGCCCGGCGACGACCGCCCCGACCCGGAGCTGAGCGCCCTCGGCAACCTGCCGGCGGAGCAG…	ATGTTCGAACGCATCATCCAATTCGCCATCGAGCAACGCTGGCTGGTCCTGCTGGCGGTGCTGGGGATGGCCGGGGTCGGCATTGGCAGCTACCAGAAGCTGTCCATCGACGCGGTCCCGGACATCACCAACGTCCAGGTGCAGATCAATACCGCCGCCCCCGGCTACTCGCCGCTGGAAGTGGAGCAGCGGATCACCTACCCGGTGGAGACCGTCATGGCCGGCCTGCCGGGTTTGCAGGAAACCCGTTCGCTGTCGCGGCCGGGGATTTCCCAGGTGACGGTGATCTTCGAGGAAGGCACCGACATCTACTTCGCCCGCCAGCAGGTCAACGAACGCCTGAGCACGGCGCGCGAGCAACTGCCGGAAGACATCTCGCCGACCCTCGGGCCGATCTCC…	ATGTCCTTCAACCTTTCCGCCTGGGCGTTGCAGAATCGCCAGATCGTCCTGTACCTGATGATCCTGCTTGGCGCGGTTGGCGCGCTGTCCTACAGCAAGCTGGGGCAGAGCGAAGACCCGCCGTTCACCTTCAAGGCCATGGTGGTGCAGACCAACTGGCCGGGTGCCAGCGCCGAAGAGGTGGCCCGGCAGGTCACCGAGCGTATCGAGAAGAAGCTGATGGAAACCGGCGACTACGATCGCATCGTGTCCTTCTCCCGCCCCGGCGTCTCGCAGGTGACCTTCATGGCCCGCGAGGACATCCATTCCAGCGAGATCCCCGAACTCTGGTACCAGATCCGCAAGAAGATCAGCGACATTCGCGCCACCTTGCCGCAAAGCATCCAGGGCCCGTTCTTC…	ATGCGCACCGAGCAACCGAAAGTCATCCACCTCAAGGACTATCAGGCGCCGGACTACCTGATCGACGAGACCCACCTGAAGTTCGAACTGTTCGAAGACCACAGCCTGGTACACGCCGAGTTGAAGCTGCGGCGCAACCCCGAGCGCGGCGCCGGCCTGCCGCCGCTGTTGCTGCATGGCCAGCAACTGGAGCTGCTGGCGCTCGAACTGGACGGCCAGGCGCTCGGCGCGGACGACTACCAACTGGACGACGAGCAGCTCGGGGTGCAACCGCGGCAGGCCGAGTTCGTCCTCAGGAGCACGGTGCGTATCCATCCGGAGAGCAACACCGCGCTGGAAGGCCTGTACAAGTCCGGCAAGATGTTCTGCACCCAGTGCGAGGCCGAGGGTTTCCGCAAG…	ATGACCGATAACCTGAACCTCGGCGCCATCGACCTGGGCACCGACGACGAATTCATCGCCCGCCATATCGGCCCGCGCGCCGCCGACACCCAGGCCATGCTCCAGCGCCTGGGCTACGACTCGCTGGACACGCTGATCGGCAACGTGATCCCGGACAGCATCAAGGGCAGCAGCGTGCTCGACCTGCCGGCCGGCATGGGCGAGGCCGAGGCGCTGGCCAGCCTGAAGGCGATCGCCGCGCGCAATCGCGCGTTGCGTTCCTTCATCGGCCAGGGCTACTACAACTGCCACACCCCGGCACCGATCCTGCGCAACCTCCTGGAGAACCCGGCCTGGTACACCGCCTACACGCCGTACCAGCCGGAAATCTCCCAGGGCCGCCTGGAGGCGCTGCTGAAC…	GCAGGTTTCCCATGACGAGCTGGTCGCTCGCCTGTCCATGGTCGGCCTCGAGGTCGACGCCGACCTGCCGGTCGCCGGCGCCTTCAGCGGAGTGGTGGTCGGCGAGGTGCTCTCGACCGAACAGCATCCGGACGCCGACAAGCTGCGCGTCTGCCAGGTCAGCAACGGCAGCGAGACCTTCCAGGTCGTCTGCGGCGCGCCCAACGTGCGCGCGGGCCTGAAGATTCCCTTCGCCATGATCGGCGCCGAACTGCCGGGCGACTTCAAGATCAAGAAAGCCAAGCTGCGTGGCGTCGAGTCCTTCGGCATGCTCTGCTCGGCCAAGGAATTGCAGATCAGCGAAGAGAACGCCGGTCTGCTCGAGCTGCCGGCCGACGCGCCGGTCGGCCAGGACGTCCG…	ATGAGCGAGAACAACACGTACGACTCTTCCAGCATCAAGGTGCTGAAGGGGCTGGATGCCGTACGCAAGCGCCCCGGCATGTACATCGGCGACACCGACGATGGCACCGGTCTGCACCACATGGTGTTCGAGGTGGTGGATAACTCCATCGACGAAGCGCTGGCCGGTTATTGCAGCGAAATCAGCATCACCATCCATACGGATGAGTCGATCACTGTCCGCGACAATGGACGCGGTATTCCGGTGGATATCCACAAGGAAGAAGGGGTTTCTGCGGCGGAAGTGATCATGACCGTCCTCCACGCCGGCGGCAAGTTCGACGACAACACCTACAAGGTGTCCGGCGGCTTGCACGGTGTGGGCGTCTCGGTGGTGAACGCGCTGTCCCATGAACTGCGC…	ATGCTGATCCTGCGCGGCGCTCCCGCCCTTTCCGCTTTCCGCCACGGCAAACTGCTTGAGCAACTGACCCAGCACGTACCTGCCGTTACCGGGCTGTACGCTGAGTTCGCGCATTTCGCCGACGTCACCGGCGCGCTCACCGCCGACGAGGAGCAGGTGCTGGCGCGGCTGCTGAAATACGGCCCGAGCGTGCCGGTGCAGGAGCCCAGCGGACGGCTGTTCCTGGTGGTGCCGCGCTTCGGCACCATCTCGCCGTGGTCGAGCAAGGCCTCCGACATCGCCCGCAACTGCGGCCTGGCGAAGATCGACCGGCTGGAGCGCGGCATTGCCTACTATGTGCAGGGCGAACTGTCCGAGAGCGACGCCCAGCAGGTCGCCGCCCGCCTGCATGACCGCATG…	ATGAGTGGCCGCTCCGCTGGTTTCGCCCTGCCCAGCCGCGACGAGTGGCGGCGCGCGCTGGCCGAGTGGGCGCGCAGCGACGGGGCGACCTGGATCTACGTGTTCAAGGTGCTCTGCGCGGCCTTCCTGACCCTCTGGCTGGCGATGCGCCTGGAGTTGCCGCAACCGAGCACGGCGACCATCACCGTGTTCATCGTCATGCAGCCGCAGAGCGGCCAGGTGTTCGCCAAGAGCTTCTACCGCATCCTCGGCACCCTGGTCGGCCTCAGCGTGATGGTCACCCTGATCGCCCTGTTCGCCCAGGAGCGGGTGCTGTTCCTGCTCAGCTCGGCGATCTGGATCGGTCTCTGCACCGCCGGGGCCGCCCGCTACCGTGACTTCCGCTCCTACGCCTGCGTG…	ATGAGCGAATCCCTCGATCTGAGCCTGGAAGGGGTCGAACGCCGGTCGTTGGCCGAGTTCACCGAGCAGGCCTATCTGAACTATTCCATGTACGTGATCATGGACCGCGCCCTGCCGCATATCGGCGACGGCCTGAAACCGGTGCAGCGACGCATCGTCTACGCCATGAGCGAACTGGGGCTGGATGCCGATTCCAAGCACAAGAAGTCGGCGCGCACCGTCGGCGACGTGCTCGGCAAGTTCCACCCGCACGGCGACTTGGCCTGCTACGAGGCCATGGTGCTGATGGCGCAGCCGTTCTCCTATCGCTATCCGCTGGTGGACGGCCAGGGCAACTGGGGGGCGCCGGACGATCCCAAGTCCTTCGCCGCCATGCGTTATACCGAGGCGCGCCTGTCG…	ATGTCTTCACGCAAGATCGGGCTCAACCTGGTGGTCATCGTCGCCCTGGCCGCCCTCTTCACCGGCATCTGGGCCCTGTACAACCGTCCGGTCAGCGTACCGGACTGGCCGGAACGCATCTCCGGCCTCTCCTTCTCGCCGTTCCGCCTCAACCAGAACCCGCAGAGCGGCCGCTACCCCAGCGCCGAACAGATGCGCACCGACCTGGAACTGGTCGCCCGGCACACCCACAGCATCCGCACCTATTCGGTCCAGGGCGCGCTCGGCGATATCCCGGCGCTGGCCGAGGCGTTCGGCCTGCGCGTCAGCCTGGGCATCTGGCTCGGCCCGGACCTGGCCGGCAACGAGGCCGAGATCGCCCGCGCCATCCGCATCGCCAACGAGTCGCCGAGCGTGGTG…	ATGACCGCCATGCCCGAAGTACTTCGCGAAGATACGCTGAACATCCCCGACAGCCGTGGGCTGAATCTCTACACCTGCGATCCGGCCCTGGAGCGGCTGCTGGAGGTATACCTGCCGCCGGCGTTGCTCGCCGAATGGCGGCCGCTCCTCGAACGGCTCGGCGCCCGTGCCGGCGGCGAGCTGGACGTGCTGGCGCTGGCGGCGGACAAGAACCCGCCGGTGCTGGCGCCGCGCACCCGCCGCGGCGAGGATTTGCAGAGCATTCGCAAGCATCCGGACTACGTCGCCCTCGAACAGGTGGCCTATGCCGAACTTGGCCTGGCTTCCATGAGCCATCGCCCGGACGGCCCGCCGCCGCTGGTGAAGTATGCGCTCACCCACCTGTTCGTACAGGCCGAG…	ATGTCCGAATTCTTCATCAAGCGGCCGAACTTCGCCTGGGTGGTGGCCCTGTTCATCTCCCTGGCCGGCCTGCTGGTCATTTCCAAATTGCCGGTAGCGCAGTACCCCAATGTCGCGCCGCCACAGATCACCATCACCGCCACCTATCCCGGCGCCTCGGCGAAGGTGCTGGTGGACTCCGTCACCAGTGTGCTCGAGGAGTCGCTGAACGGCGCCAAGGGCCTGCTCTACTTCGAGTCGACCAACAACTCCAACGGCACCGCCGAGATCGTCGTCACCTTCGAGCCGGGCACCGATCCGGACCTGGCCCAGGTGGACGTGCAGAACCGCCTGAAGAAAGCCGAGGCGCGCATGCCGCAGGCGGTGCTGACCCAGGGCCTGCAGGTCGAGCAGACCAGC…	ATGAGCCAGCAGCAGATGCCCGTGGCCCTCGATCCGCTGGACTTCCCGTTGCACGGCAGCCGCCTGATCGAGGCCAGCGCCGGTACCGGCAAGACGTTCACCATCGCCCTGCTATACGTACGCCTGGTCCTCGACCATGGCGGCGAGAGCGCTTTCGGCCGGCCGCTGAGCCCGCCGGAAATCCTCGTGGTGACCTTCACCGATGCGGCGACCCAGGAACTCCGCGAGCGTATCCGCAGCCGCCTGGGCGAAGCGGCGCGTTGTTTCGCCGAGCCGCAGGAGCGCCACGACGGCCTGCTGGTCGCGTTGCGCCAGCAGTATCCCGCCGAGCGCTGGCCGGGCTGCGCGCGCCTGCTGCGCCTGGCCGCGGAGTGGATGGACGAGGCCGCGGTATCGACC…	ATGAGGCGCGCCAGCCTGCATATGTTGCTCTGCCAGTTCGCCATGGCCCTGGGCCTGCTCCTGAGCCTGGGCAGCGAGGCCTGGGCCGCCAGGCCGGCTCCGCAGGCGGCCGTCGACCTGGAAGCGCCGGCCGCCCTGGCCGAGGACGCCAGCCTCGACCAGCTCAACGCGCAACTCGACCTGATCCGCCAGCGCGTTACCGCCGACGCCAGCGACGACCTCCTCGCCGAGTTGCGCCAGAGCGCGCTGCAAGTCCAGCGCCAGGCCGACGCCCTGCTCGCGCTACGGGTGGCCGACATCGAGCGGCTCGACGATCAGTTGAAAGTGATCGGCCCGCCGCAGCCCGACGAGGCGGAAAGCCTCGCCGCCCAGCGCCAGGCCCTGACCCGGCAGAAGAAC…	CTGCTGTTCGCCGCGGTGGTCATCGGCTTCCCCCAGCGCGCCGGCGAATGGTTGCTGGCCGCACAGACCTGGGCCTCGCAGACCGTCGGCTGGTACTACCTGCTGGCGATGACGCTGTACCTGATCTTCGTGGTGGTCACCGCGCTTTCCGGCTACGGCAAGATCAAGCTCGGTGCCGACCACGACGAGCCGGAATTCAGCTACCTGTCCTGGGCCGGCATGCTGTTCGCCGCCGGCATCAGCATCACCCTGTTCTTCTTCTGCGTATCCGAGCCGTTGACCCACTTCCTCCAGCCGCCGCAAGGCGAGGCCGGTACCCAGGAAGCCGCGCGGCAGGCCATGGAACTGCTGTTCCTGCACTGGGGCCTGCACGGCTGGGGCGTGTTCGCCCTGGTGGCG…	ATGGTCCAGGGCACCACCTCGGACGCCGGCAAGAGCACCCTGGTGACCGCGCTGTGCCGCTGGCTGGCCCGGCGCGGCGTCGCGGTGGTGCCGTTCAAGCCGCAGAACATGGCGCTGAACAGCGCGGTCACCGCCGACGGCGGCGAGATCGGCCGCGCCCAGGCGGTCCAGGCCCAGGCCTGTCGGCTGGCGCCGCATACCGACATGAACCCGGTGCTGCTCAAGCCGAACACCGACATCGGCGCCCAGGTGATCATCCATGGCCGCGCGGTGACCAGCATGGACGCCGCCGCCTACCACGACTACAAGCGCGTGGCGATGGAAGCGGTGCTGGCTTCCCATGGGCGGCTCGCCGCCGCCTACCGGGTGGTGATGGTGGAGGGCGCCGGCTCGCCGGCG…	ATGGCCAGCCTGTTCCTCGGCCGCAAGGAAATCGACGACGACCTGCTCGACGACATCGAGACGCGCCTGCTGACCGCCGACGTCGGCGTCGAGGCCACCACCCTGATCGTGCAGAACCTGACCAAGCGCGTGGCGCGCAAGGAGCTGGCCGACAGCGGCGCGCTGTACAAGGCGCTGCAGGAAGAGCTGGCCAGCCTGCTGCGCCCGGTGGAGCAGCCGTTGCAGGTCGACGTCGCGCGCGAGCCCTATGTGATCCTGGTGGTCGGGGTGAACGGCGTGGGCAAGACCACCACCATCGGCAAGCTGGCGAAGAAGCTGCAACTCGAGGGCAAGAAGGTCATGCTGGCCGCCGGCGACACCTTCCGCGCCGCCGCCGTGGAGCAGTTGCAGGTCTGGGGC…	TTGCGTATCGAGAACTTCGCGCCCATCGACAGCCAGGGTTTCCGTTTCCTGCTCCGGCCGGGGGATGAGCCTCTGCTCGCGGTCCTCGATCGAGCCCTGCCGCGTATCAATGGGCGCTACGGCGACGAACTGTTGCGCAGTTGGAGCGCCGGGCGGCGCCTGCGTTTCGACGATCCCAGGGTGACGCTTGCGCCGGCGGAACAGCGTTGGCTCTCCACGCATCCGGTCGTGCCGGTGGTAATCAACCATTCCCTTGGCGCGCTCGGGCAACTGGATAGCGAGGGGCGGCTGAGCGGTATCGGGCGTGACTATCTGGACCTGATCGGCAAGCGCAGCGGCCTGCAGTTTTCCTTCAGCGGAGCCCGAAACTTCGTCGAGGCGAAACGTCGACTGGATGCG…	CGAGCCACCGCCCGCGGACGACTACTACGAAGTCGACATGGATACCCTGGCCTACCTGGATGCCGCGCCCGAGCCTGACGTGGTCGTGGTGGAGGAGCCGCTGCCGGCGGCGAAGCCGGCCACCGGCCTGGCCGCGGAGTGGCTGGAGCTGTTCCCGCGGCTCGGCCTCGGCGGCCTGACCGCCAGCATCGCTGCCAACTGTACGCTGGTAGCTGCCGACGACGACCAATGGCATCTGCATCTCGATCCGGGCCAGAGCGCGCTGTTCAACGCCACCCAGCAGCGGCGGCTGAACGATGCGCTGAACCAGCACCTGGGGCGCACCCTCAAACTGGAGGTGACCCTGCAGAAGCCTGAGCAGGAGACCCCGGCCCAGGCAGCGGCACGCCGGCGTGCCGA…	ATGTCGCAGACGCCGTCCCTCGCCCAGCTCCAGCCCGCCGATGCCTTCCTGCGCCGCCACCTCGGCCCCGATCCGGCGGAACAGCAGGCCATGCTGGATTTCCTCGGAGTTTCCACTCGCGCCGAACTGATCGTGCAGACGGTGCCGCCGGCGATCCGCCTCAACCGGCCGCTGGAACTGCCCGCCGCGCTCGACGAACAGGCCGCCCTGGCGCGCCTGCGCGGCTACGCCGGGCTCAACCAGCGCTGGACCAGCCTGATCGGCATGGGCTACTACGGCACCGTGACGCCGCCGGTGATCCTCCGCAACGTGCTGGAGAATCCCGGCTGGTACACCGCCTATACGCCCTACCAGCCGGAAATCGCCCAGGGCCGCCTGGAAGCGCTGCTGAATTTCCAG…	GTGATCCTCGCCGACGAGCAGGAAGAGTTCGGCGGCAGCCTGCTGGACACCCGCGAGACCCTCGACGGCAAGCCCGCCGCCGAGTGGGTCGCGGACGCCGTGGCCGAGCTGCAAGGCCTGCCGGAAGTCATCCTGCTACCGCGCTCCACGGTCAACGGCTACCACGACCACAACTTCCTCACCATCCACGAGCGGCGCACCGACCACCTCGGCGAGGTCGCCCCGCTCGGCCAGGTCCGCCAGCGTGTGCACCGCGTGCGCGCCAAGCGCGTGGTACTGGCCGCCGGCGCCCATGAGCGGCCGCTGGTCTACGGCAACAACGACCTGCCCGGCAACATGCTCGCCGGCGCGGTTTCCACCTATGTACGGCGCTACGGCGTGGCACCGGGCAAGAAACTG…	GTGCGCAGCTATCTCGAATGGCTGCTGGACAACCACTTCACCTTCCTCGGCTACGAGGAATTCAGCGTCGCCGACGAGGCCGACGGCGGGCGCATGGTCTACGACGAGAAATCCTTCCTCGGCCTGACCCGTCTGCTGCGTGCCGGCCTGAGCAAGGATGACCTGCACATCGAGGACTATGCCGTCGCCTACCTGCGCGAACCGGTCCTGCTGTCCTTCGCCAAGGCTGCCCATCCGAGCCGTGTGCACCGCCCGGCCTACCCGGATTACGTGTCGATCCGCGAGCTGGACCGCAAGGGCCGGGTGATCCGCGAGTGCCGCTTCATGGGCCTGTTCACCTCCTCGGTGTACAACGAGAGCGTCAACGACATCCCCTTCATCCGCGGCAAGGTCGCCGAA…	GTGTACGGCGAATATTCTCGGGAAAGCATTACCTGTCTGCTCGCCATACTGTTATCCGGCCATCACTACTTATATATAGACCTGAAACAACCGGCGGCCTGGAATGCAGAGTTGTGCCGGCAGGTCGACTGCCGCCTGATTCTCGACTGCTCGACCACGCCGACGCCCGCCAACGGTCTTCCCTGCGTCCCGGTCAGGCACCTGCCTGCCGCTCCAGCCTCGGTCGCCCGGCCATGCTTCGCGGCGGACCAGATCGCCTACATCAACTTCTCCTCGGGCACCACCGGCCGCCCGAAAGCCATCGCCTGCACCCACGCCGGCATTACCCGCCTGTGCCTGGGCCAGTCGTTCCTCGCGTTCGCTCCGCAGATGCGCTTCCTGGTGAACTCGCCGCTGTCC…	CTGCTGGAAGAAGGTGCGGACGAGGTATTCGAGGAAATCCTCGCCGCCGCTACGTCCTACTTCCAGACGCCCATCGCGCTCATTTCCATCCTCGACCATCAGCGCCAGTGGTTTCGCGCGAGCATCGGCCTCGATATCCGGCAGACGCCGCGACGGGATTCGTTCTGCGCCTATGCGATCCTGGGCAAGGGAGTATTCGAGGTGGCCGACGCCACCCTCGACCCGCGCTTCCGGGACAACCCCTATGTGCAAGGCGAACCGCGCATCCGCTTCTACGCCGGGGCTCCGCTGGCCACCGCGGAAGGTCTCAACCTCGGCAGCCTCTGCGTCATCGACCGGGAACCACGCGGGCCGCTGGCCGAGCGGGACGTCGCCATGCTCGAGCACTTCGCCCGGCTG…	ATGTCCCTGAGTGTCTTCGATCTGTTCAAGATCGGCATCGGGCCGTCCAGCTCCCACACCGTGGGGCCGATGCGTGCCGCCGCGCGCTTCGCCGAGGGGCTGAGGCGCGAGGGGTTGCTGGAGGCCACTGCCAGCGTCAAGGTCGAGCTGTACGGCTCGCTCGGCGCCACCGGCAAGGGCCACGGCAGCGACAAGGCGGTACTGCTCGGCCTGGAGGGCGAGCAGCCGGACACGGTGGATACCGCCGCGATTCCCGCCCGGCTCGATGCCATCCGTTCCAGCGGCGAGCTGCGCCTGCTCGGCGAGCGGCCGATCCGCTTCGTCGAGAAGGAACACCTGGCGCTGATCCGCAAGCCGCTGGCCTACCATCCCAACGGCATGATCTTCCGTGCCTTCGAC…	ATGAACAGAGTTTTCCTGACCCCGGCAGCCGTGGCGCTGTGCGGCGCGTCTTCCCTGAGCCTGGCCGAACCGGTCAGCCTTGCCGACCAGGTGGTGACCGCCACCCGTACCGCCCAGACCGCTTCCCAGAGCCTGGCGGCGGTGAGCGTCATCGACCGCGAGGATATCGAGCGCAGCCAGGCGCGCAGCGTGCCGGAGCTGTTGCGCCAGGTACCCGGCGTGTCGCTGGCGAACAACGGCGGTTTCGGCAAGAACACCACGCTGTTCCTGCGCGGCACCGAGTCCGACCATGTGCTGGTGCTGATCGACGGCATCAAGGTCGGCTCGGCCAGCGCCGGCCTCACCGCGTTCCAGGATTTGCCGGTGGAGCTGATCGAGCGCATCGAGGTGGTCCGCGGG…	GTGCGGGTGCTCAACTGGAGCTGGGGCATCCACCGCGTCGGCGCTCGCGACGTCGATGGCGACGAGGTGGATTCGCTGGTGCGCTCGGGGATTGCCATGAGCGGCTACGAGGAGTTGCTCGAGGAGTTCTTCCTCTGGCTGCGCAAGAAGCATCCGGACGTGCTGGTGGTCAACTCCGCCGGCAACGGCTCGTCCTACTCCGGTACCGACGAATACCGCCTGCCGTCCTCCTTCGTCACCGAGCAGTTGCTGGTGGTGGGCGGCCACCAGCGCAGCGAGCGCCAAGGCCTGGCGGTGGACGACCCGGCCTACGCGGTCAAGCGCAGCACCTCGAACGTCGACATGCGGGTGGATGTCACCGCCGCCGCCTGTACCCATGCCTCGACCCTGGAGCGGGAC…	TTGCAGGCAGCTTGCGCGTTCGGCCCGCCCGGGCGGCTATTCCGCGCCTGCGACGAGCAAGGACGCGAGGCGTTGCTGCTGCTCGCGGCGGTCGATGCCGACGAAGCGTTCTGGCAGCGCGAATGGGCATTGCGGCGCTGCCGTGCGGAGAGCCTGCCGCGAGTATTGTCGTCGCCCCGGTTGCGTCGTCATGCCTTCCAGTTGTTCGCTCCGCCGCGCTGGCCGATGCGCAGCCTGCTGGATTGGGCGCCAGCGCACCTGCCGCTGGAACCGCAATGCGCGCTGGTCCTCCTGGAGCAACTTATCGATGCGGTTCGCGCCTTGCAGCGGCGCGGCGTACAGGGCTTGTGGCTGGCGCCGCGGCAGATCCTGCTGGACGAGGGCGGGCGCCTGCTGTTC…	ATGTTCAACCCGGCCAACCAGACCCACTTCAGCCTCACCCTCGACGGCCTCCGCCACGACCTGCAGGTCCTCGCCTTCAACGGCCACGAAGGCATCAGTCGCCCCTACCGTTTCGAACTCGAACTGGTCGGAGAGCGCGCCGGCCTCGACCTCGAAACGTTCCTGCACCGGCCCGCCTTCCTCGCCTTCACCCCGCAGGGCCAGGGTGTCCACGGCCTGGTCTACGGCGCTGCCCAGGGCGATGCCGGCAAGCGCCTGACCTGCTATCGCCTCACCCTCGTCCCGCACCTGGCCTACCTCGCCCAGCGCAACAACCAGCGGATCTTCCAGCACCTCACGGTGCCGCAGATCGTCGCCCTGGTCCTCGAGGAGCACGGCATCCTCGCCGACGCCTACCGC…	GTGGCTCTCCATCGCCTGGCCTTTATCTTCCTGTGCCTGCCTCTCATGGCCAGCGCCGCCCCCTTCACCTCCCCCGGCGACCGCGACCTGATCCGCGACCGCCAGCAGCGCCTGCTGGACGAACAGCGCAAGCGCCTGGAGGAACTCCAGCAACTGCCCGGCAAGGGAGCGCCCGCCGCTGCGGATGCCTCCGGCGACGACGAGCGCTGCTTCGAGATCCGCCGCATCGAGCTGGAAGGCGCCGGGCACCTCGGCGAAAGCGCGCGTCGCCAACTGCTGGCTCCCTACCAGGGGCGCTGCCTGGGCGTCGGCCAGCTCAATGCGCTGCTCAAGGCCGTCACCGACCATTACCTGGATCGCGGCTACGTCACCACCCGCGCCTACCTGCCACAGCAGGAC…	ATGGGTGACCGGCACGACTACGTCGCTCTGGAATGGATGAAAGGCGAGATCGCCGAAACCCTGAAACAGGCGCGCCAGGCGCTGGAAGCGTTCGTCGAGAACCCGCAGGACCCGACCCGCATGCGGTTCTGCCTGACCTACGTGCACCA---GGTGCAGGGCACCCTGCAGATGGTCGAGTTCTACGGCGCGGCCCTGCTCGCCGAGGAAATGGAGCAGTTGGTCCAGGCCTTGCTGGACGGTCGCGTGCCGAACCAGGGCGAGGCCCTGGAAGTGCTGATGCAGGCGATCCTGCAACTGCCGGTCTACCTCGACCGGATCCAGACCGCCCGGCGCGACCTGCCGATGGTGGTCCTGCCGCTGCTCAACGACCTGCGCGCCGCGCGCGGCGAGAAGCTG…
26	ATGACCTTCGACGCCGCGTTCCAGCAGCTCGGCGAGCGGATGGCCGGCGGGGCCCTGGCGGAAACGGCGCTGGCGCCGTTCACCCATCTGCTGATCGACGAGTTCCAGGATGTCTCGCCGCAGATCGTCCTCTGGCTACAGGCGTTGCACCGTCGCCTGGCAA---CCCAGGGCACCGCGCCGAGCCTGATGGCCATCGGCGACGACTGGCAGTCGATCTACGGCTGGCGCGGCAGTTCGCCGGAGCTGTTCATCGACTTCGACCGGCACTTCCCCTCGCGTGGGCGGGGACGCAAGAGCGCGCTGCTGGTGCTGGAAACCAACTACCGCTCCGTCGAACCGATCATTCGCGACGGCGAGAAGGTGCTGGCCGGGGTGCGTTTCAAGCAGGACAAGACC…	ATGCACCTGTTGCGCACCCAACCCGGCGGCTTCGTTCCCGACGACGGCATCGCCCACCTGGCCCAGACTCCCGCCGAGCTGGTGATCCTCTGCAGCGGCGATTCGCACCTCGCATTGCTGGCCGAGGCCGCCCGTGCGCTGCCGGACGACTACCCGAGCCTGCGCCTGGCCAACCCCATGCAGTTGCAGAACCACGCCTCGGTGGACCTCTACGTCGAGGAAGTGCTGCGGCACGCGCGGGTGATCCTGCTTTCGCTGCACGGCGGCATCGGCTACTGGCGCTACGGCGTGGAGCAACTGGTGGCGCTGGCCGAGCGCGGCGCGCTGCTGATCCCGGTGCCCGGCGACGACCGCCCCGACCCGGAGCTGAGCGCCCTCGGCAACCTGCCGGCGGAGCAG…	ATGTTCGAACGCATCATCCAATTCGCCATCGAGCAACGCTGGCTGGTCCTGCTGGCGGTGCTGGGGATGGCCGGGGTCGGCATCGGCAGCTACCAGAAGCTGTCCATCGACGCGGTCCCGGACATCACCAACGTCCAGGTGCAGATCAATACCGCCGCCCCCGGCTACTCGCCGCTGGAAGTGGAGCAGCGGATCACCTACCCGGTGGAGACCGTCATGGCCGGCCTGCCGGGTTTGCAGGAAACCCGTTCGCTGTCGCGGCCGGGGATTTCCCAGGTGACGGTGATCTTCGAGGAGGGCACCGATATCTACTTCGCCCGCCAGCAGGTCAACGAACGCCTGAGCACGGCGCGCGAGCAACTGCCGGAAGACATCTCGCCGACCCTCGGGCCGATCTCC…	ATGTCCTTCAACCTTTCCGCCTGGGCGTTGCAGAATCGCCAGATCGTCCTGTACCTGATGATCCTGCTTGGCGCGGTTGGCGCGCTGTCCTACAGCAAGCTGGGGCAGAGCGAAGACCCGCCGTTCACCTTCAAGGCCATGGTGGTGCAGACCAACTGGTCGGGTGCCAGCGCCGAAGAGGTGGCCCGGCAGGTCACCGAGCGTATCGAGAAGAAGCTGATGGAAACCGGCGACTACGATCGCATCGTGTCCTTCTCCCGCCCCGGCGTCTCGCAGGTGACCTTCATGGCCCGCGAGGACATCCATTCCAGCGAGATCCCCGAACTCTGGTACCAGATCCGCAAGAAGATCAGCGACATTCGCGCCACCTTGCCGCAAAGCATCCAGGGCCCGTTCTTC…	ATGCGCACCGAGCAACCGAAAGTCATCCACCTCAAGGACTATCAGGCGCCGGACTACCTGATCGACGAGACCCACCTGAAGTTCGAACTGTTCGAAGACCACAGCCTGGTGCACGCCGAGTTGAAGCTGCGGCGCAACCCCGAGCGCGGCGCCGGCCTGCCGCCGCTGTTGCTGCATGGTCAGCAACTGGAGCTGCTGGCGCTCGAACTGGACGGCCAGGCGCTCGGCGCGGACGACTACCAGCTGGACGACGAGCAGCTCGGGGTGCAACCGCGGCAGGCCGAGTTCGTCCTCAGGAGCACGGTGCGTATCCATCCGGAGAGCAACACCGCGCTGGAAGGCCTGTACAAGTCCGGCAAGATGTTCTGCACCCAGTGCGAGGCCGAGGGTTTCCGCAAG…	ATGACCGATAACCTGAACCTCGGCGCCATCGACCTGGGCACCGACGACGAATTCATCGCCCGCCATATCGGCCCGCGTGCCGCCGACACCCAGGCCATGCTCCAGCGCCTGGGCTACGACTCGCTGGACGCGCTGATCGGCAACGTGATCCCCGACAGCATCAAGGGCAGCAGCGTGCTCGACCTGCCGGCCGGCATGGGCGAGGCCGAGGCGCTGGCCAGCCTGAAGGCGATCGCCGCGCGCAATCGCGCGTTGCGTTCCTTCATTGGCCAGGGCTACTACAACTGCCACACCCCGGCACCGATCCTGCGCAACCTCCTGGAGAACCCGGCCTGGTACACCGCCTACACGCCGTACCAGCCGGAAATCTCCCAGGGCCGCCTGGAGGCGCTGCTGAAC…	GCAGGTTTCCCATGACGAGCTGGTCGCTCGCCTGTCCATGGTCGGCCTCGAGGTCGACGCCGACCTGCCGGTCGCCGGCGCCTTCAGCGGCGTGGTGGTCGGCGAGGTGCTCTCGACCGAACAGCATCCGGACGCCGACAAGCTACGCGTCTGCCAGGTCAGCAACGGCAGCGAGACCTTCCAGGTCGTCTGCGGTGCGCCCAACGTACGCGCGGGCCTGAAGATTCCCTTCGCCATGATCGGCGCCGAACTGCCGGGCGACTTCAAGATCAAGAAAGCCAAGCTGCGTGGCGTCGAGTCCTTCGGCATGCTCTGCTCGGCCAAGGAATTGCAGATCAGCGAAGAGAACGCCGGTCTGCTCGAGCTGCCGGCCGACGCGCCGGTCGGCCAGGACGTCCG…	ATGAGCGAGAACAACACGTACGACTCTTCCAGCATCAAGGTGCTGAAGGGGCTGGATGCCGTACGCAAGCGCCCCGGCATGTACATCGGCGACACCGACGATGGCACCGGTCTGCACCACATGGTGTTCGAGGTGGTGGATAACTCCATCGACGAAGCGCTGGCCGGTTACTGCAGCGAAATCAGCATCACCATCCATACGGATGAGTCGATCACTGTCCGCGACAATGGACGCGGTATTCCGGTGGATATCCACAAGGAAGAAGGGGTTTCTGCGGCGGAAGTGATCATGACCGTCCTTCACGCCGGCGGCAAGTTCGATGACAACACCTACAAAGTGTCCGGCGGCTTGCACGGTGTGGGCGTCTCGGTGGTGAACGCGCTGTCCCATGAGCTGCGC…	ATGCTGATCCTGCGCGGCGCTCCCGCCCTTTCCGCTTTCCGCCACGGCAAACTGCTCGAGCAACTGACCCAGCACGTACCTGCCGTTACCGGGCTGTACGCTGAGTTCGCGCATTTCGCCGACGTCACCGGCGCGCTCACCGCCGACGAGGAGCAGGTGCTGGCGCGGCTGCTGAAATACGGCCCGAGCGTGCCGGTGCAGGAGCCCAGCGGACGGCTGTTCCTGGTGGTGCCGCGCTTCGGCACCATCTCGCCGTGGTCGAGCAAGGCCTCCGACATCGCCCGCAACTGCGGCCTGGCGAAGATCGACCGGCTGGAGCGCGGCATTGCCTACTATGTGCAGGGCGAACTGTCCGAGAGCGACGCCCAGCAGGTCGCCGCCCGCCTGCATGACCGCATG…	ATGAGTGGCCGCTCCGCTGGTTTCGCCCTGCCCAGCCGCGACGAGTGGCGGCGCGCGCTGGCCGAGTGGGCGCGCAGCGACGGGGCGACCTGGATCTACGTGTTCAAGGTGCTCTGCGCGGCCTTCCTGACCCTCTGGCTGGCGATGCGCCTGGAATTGCCGCAGCCGAGCACGGCGACCATCACCGTGTTCATCGTCATGCAGCCGCAGAGCGGCCAGGTGTTCGCCAAGAGCTTCTACCGCATCCTCGGCACCCTGGTCGGCCTCAGCGTGATGGTCACCCTGATCGCCCTGTTCGCCCAGGAGCGAGTGCTGTTCCTGCTCAGCTCGGCGATCTGGATCGGCCTCTGCACCGCCGGGGCCGCCCGCTACCGTGACTTCCGCTCCTACGCCTGCGTG…	ATGAGCGAATCCCTCGATCTGAGCCTGGAAGGGGTCGAACGCCGGTCGTTGGCCGAGTTCACCGAGCAGGCCTATCTGAATTATTCCATGTACGTGATCATGGACCGCGCTCTGCCGCATATCGGCGACGGCCTGAAGCCGGTGCAGCGACGCATCGTCTACGCCATGAGCGAACTGGGGCTGGATGCCGATTCCAAGCACAAGAAGTCGGCGCGCACCGTCGGCGACGTGCTCGGCAAGTTCCACCCGCACGGCGACTTGGCCTGCTACGAGGCCATGGTGCTGATGGCGCAGCCGTTCTCCTATCGCTATCCGCTGGTGGACGGCCAGGGCAACTGGGGGGCGCCGGACGATCCCAAGTCCTTCGCCGCCATGCGTTATACCGAGGCGCGCCTGTCG…	ATGTCTTCACGCAAGATCGGGCTCAACCTGGTGGTCATCGTCGCCCTGGCCGCCCTCTTCACCGGCATCTGGGCCCTGTACAACCGTCCGGTCAGCGTACCGGACTGGCCGGAACGCATCTCCGGCTTCTCCTTCTCGCCGTTCCGCCTCAACCAGAATCCGCAGAGCGGCCGCTACCCCAGCGCCGAACAGATGCGCGCCGACCTGGAACTGGTCGCCCGGCACACCCACAGCATCCGCACCTATTCGGTCCAGGGCGCGCTCGGCGACATCCCGGCGCTGGCCGAGGCGTTCGGCCTGCGCGTCAGCCTGGGCATCTGGCTCGGCCCGGACCTGGCCGGCAACGAGGCCGAGATCGCCCGCGCCATCCGCATCGCCAACGAGTCGCCGAGCGTGGTG…	ATGACCGCCATGCCCGAAGTACTTCGCGAAGATACGCTGAACATCCCCGACAGCCGTGGGCTGAATCTCTACACCTGCGATCCGGCCCTGGAGCGGCTGCTGGAGGTATACCTGCCGCCGGCGTTGCTCGCCGAATGGCGGCCGCTCCTCGAACGGCTCGGCGCTCGTGCCGGCGGCGAGCTGGACGTGCTGGCGCTGGCGGCGGACAAGAACCCGCCGGTGCTGGCGCCGCGCACCCGCCGCGGCGAGGATTTGCAGAGCATTCGCAAGCATCCGGACTACGTCGCCCTCGAACGGGTGGCCTATGCCGAACTCGGCCTGGCTTCCATGAGCCATCGCCCGGACGGCCCGCCGCCGCTGGTGAAGTATGCGCTCACCCACCTGTTCGTACAGGCCGAG…	ATGTCCGAATTCTTCATCAAGCGGCCGAACTTCGCCTGGGTGGTGGCCCTGTTCATCTCCCTGGCCGGCCTGCTGGTCATTTCCAAATTGCCGGTAGCGCAGTACCCCAATGTCGCGCCGCCACAGATCACCATCACCGCCACCTATCCCGGCGCCTCGGCGAAGGTGCTGGTGGACTCCGTCACCAGTGTGCTCGAGGAGTCGCTGAACGGCGCCAAGGGCCTGCTCTACTTCGAGTCGACCAACAACTCCAACGGCACCGCCGAGATCGTCGTCACCTTCGAGCCGGGCACCGATCCGGACCTGGCCCAGGTGGACGTGCAGAACCGCCTGAAGAAAGCCGAGGCGCGCATGCCGCAGGCGGTGCTGACCCAGGGCCTGCAGGTCGAGCAGACCAGC…	ATGAGCCAGCAGCAGATGCCCGTGGCCCTCGATCCGCTGGATTTCCCGTTGCACGGCAGCCGCCTGATCGAGGCTAGCGCCGGTACCGGCAAGACGTTCACCATCGCCCTGCTATACGTACGCCTGGTCCTCGACCATGGCGGCGAGAGCGCTTTCGGCCGGCCGCTGAGCCCGCCGGAAATCCTCGTGGTGACCTTCACCGATGCGGCGACCCAGGAACTCCGCGAGCGTATCCGCAGCCGCCTGGGCGAAGCGGCGCGTTGTTTCGCCGAGCCGCAGGAGCGCCACGACGGCCTGCTAGTCGCGTTGCGCCAGCAGTATCCCGCCGAGCGCTGGCCGGGCTGCGCGCGCCTGCTGCGCCTGGCCGCGGAGTGGATGGACGAGGCCGCAGTATCGACC…	ATGAGGCGCGCCAGCCTGCATATGTTGCTCTGCCAGTTCGCCATGGCCCTTGGCCTGCTCCTGAGCCTGGGCAGCGAGGCCTGGGCCGCCAGGCCGGCTCCGCAGGCGGCCGTCGACCTGGAAGCGCCGGCCGCCCTGGCCGAGGACGCCAGCCTCGACCAGCTCAACGCGCAACTCGACCGGATCCGCCAGCGCGTCACCGCCGACGCCAGCGACGACCTCCTCGCCGAGTTGCGCCAGAGCGCGCTGCAAGTCCAGCGCCAGGCCGACGCCCTGCTCGCGCTGCGGGTGGCCGACATCGAGCGGCTCGACGATCAGTTGAAAGTGATCGGCCCGCCGCAGCCCGACGAGGCGGAAAGCCTCGCCGCCCAGCGCCAGGCCCTGACCCGGCAGAAGAAC…	CTGCTGTTCGCCGCGGTGGTCATCGGCTTCCCCCAGCGCGCCGGCGAATGGTTGCTGGCCGCACAGACCTGGGCCTCGCAGACCGTCGGCTGGTACTACCTGCTGGCGATGACGCTGTACCTGATCTTCGTGGTGGTCACCGCGCTTTCCGGCTACGGCAAGATCAAGCTCGGTGCCGACCACGACGAGCCGGAATTCAGCTACCTGTCCTGGGCCGGCATGCTGTTCGCCGCCGGCATCAGCATCACCCTGTTCTTCTTCTGCGTATCCGAGCCGTTGACCCACTTCCTCCAGCCGCCGCAAGGCGAGGCCGGTACCCAGGAAGCCGCGCGGCAGGCCATGGAACTGCTGTTCCTGCACTGGGGCCTGCACGGCTGGGGCGTGTTCGCCCTGGTGGCG…	ATGGTCCAGGGCACCACCTCGGACGCCGGCAAGAGCACCCTGGTGACCGCGCTGTGCCGCTGGCTGGCCCGGCGCGGCGTCGCGGTGGTGCCGTTCAAGCCGCAGAACATGGCGCTGAACAGCGCGGTCACCGCCGACGGCGGCGAGATCGGCCGCGCCCAGGCGGTCCAGGCCCAGGCCTGCCGGCTGGCGCCGCACACCGACATGAACCCGGTGCTGCTCAAGCCGAACACCGACATCGGCGCCCAGGTGATCATCCATGGCCGCGCGGTGACCAGCATGGACGCCGCCGCCTACCACGACTACAAGCGCGTGGCGATGGAAGCGGTGCTGGCTTCCCATGGGCGGCTCGCCGCCGCCTACCGGGTGGTGATGGTGGAGGGCGCCGGCTCGCCGGCG…	ATGGCCAGCCTGTTCCTCGGTCGCAAGGAAATCGACGACGACCTGCTCGACGACATCGAGACGCGCCTGCTGACCGCCGACGTCGGCGTCGAGGCCACCACCCTGATCGTGCAGAACCTGACCAAGCGCGTGGCGCGCAAGGAGCTGGCCGACAGCGGCGCGCTGTACAAGGCGCTGCAGGAAGAGCTGGCCAGCCTGCTGCGCCCGGTGGAGCAGCCGTTGCAGGTCGACGTCGCGCGCGAGCCCTATGTGATCCTGGTGGTCGGGGTGAACGGCGTGGGCAAGACCACCACCATCGGCAAGCTGGCGAAGAAGCTGCAACTCGAGGGCAAGAAGGTCATGCTGGCCGCCGGCGACACCTTCCGCGCCGCCGCCGTGGAGCAGTTGCAGGTCTGGGGC…	TTGCGCATCGAGAACTTCGCACCCATCGACAGCCAGGGTTTCCGTTTCCTGCTCCGGCCAGGTGACGAACCTCTGCTCGCGCTCATCGATCGCGCCCTGCCGCATATTAGCGGGCGCTACGGCGACGAACTGTTGCGCAGCTGGAGCGCCGGGCGGCGCCTGCGCTTCGATGAGCCCCGGGTGACGCTGTCGCCGGCGGAGCAGCGTTGGCTCTCCGCGCACCCGGTCGTGCCGGTGGTGATCAACCATTCCCTTGGCGCGCTCGGACAAGTGGACAGCGAGGGGAAGCTGAGCGGTATCGGGCGTGATTACCTGGAACTGATCGGTAAGCGCAGTGGCCTGCGGTTTTCCTTCACTGGAGCACGCAACTTCGTCGAGACGAAAAGTCGACTGGATGCG…	CGAGCCACCGCCCGCAGACGACTACTACGAAGTCGACATGGATACCCTGGCCTACCTGGATGCCGCGCCCGAGCCTGACGTGGTCGTGGTGGAGGAGCCGCTGCCGGCGGCGAAGCCGGCCACCGGCCTGGCCGCGGAGTGGCTGGAGCTGTTCCCGCGGCTCGGCCTCGGCGGCCTGACCGCCAGCATCGGTGCCAACTGTACGCTGGTAGCTGCCGACGGCGACCACTGGCATCTGCATCTCGATCCGGGCCAGAGCGCGCTGTTCAACGCCACCCAGCAGCGGCGGCTGAACGATGCGCTGAACCAGCACCTGGGGCGCACCCTCAAACTGGAGGTGACCCTGCAGAAGCCTGAGCAGGAGACCCCGGCTCAGGCAGCGGCACGCCGGCGTGCCGA…	ATGTCGCAGACGCCGTCCCTCGCCCAGCTCCAGCCCGCCGATGCCTTCCTGCGCCGCCACCTCGGCCCCGATCCTGCGGAACAGCAGGCCATGCTGGACTTCCTCGGAGTTTCCACTCGCGCCGAACTGATCGTGCAGACGGTGCCGCCGGCGATCCGCCTCAACCGGCCGCTGGAACTGCCCGCTGCGCTCGACGAACAGGCCGCCCTGGCGCGCCTGCGCGGCTACGCCGGGCTCAACCAGCGCTGGACCAGCCTGATCGGCATGGGCTACTACGGCACCGTGACGCCGTCGGTGATCCTCCGCAACGTGCTGGAGAATCCCGGCTGGTACACTGCCTATACGCCCTACCAGCCGGAAATCGCCCAGGGCCGCCTGGAAGCGCTGCTGAATTTCCAG…	GTGATTCTCGCCGACGAGCAGGAAGAGTTCGGCGGCAGCCTGCTGGACACCCGCGAGACCCTCGACGGCAAGCCCGCCGCCGAGTGGGTCGCGGACGCCGTGGCCGAGCTGCAAGGCCTGCCGGAGGTCATCCTGCTGCCGCGCTCCACGGTCAACGGCTACCACGATCACAACTTCCTCACCATCCACGAGCGGCGCACCGACCACCTCGGCGAGGTCGCCCCGCTCGGCCAGGTCCGCCAGCGCGTGCACCGCGTACGCGCCAAGCGCGTGGTACTGGCCGCCGGCGCCCATGAGCGGCCGCTGGTCTACGGCAACAACGACCTGCCCGGCAACATGCTCGCCGGCGCGGTTTCCACCTATGTACGGCGCTACGGCGTGGCACCGGGCAAGAAACTG…	GTGCGCAGCTATCTCGAATGGCTGCTGGACAACCACTTCACCTTCCTCGGCTACGAGGAATTCAGCGTCGCCGACGAGGCCGACGGCGGGCGCATGGTCTACGACGAGAAATCCTTCCTCGGCCTGACCCGTCTGCTGCGTGCCGGCCTGAGCAAGGATGACCTGCACATCGAGGACTATGCCGTCGCCTACCTGCGCGAACCGGTCCTGCTGTCCTTCGCCAAGGCTGCCCATCCGAGCCGCGTGCACCGCCCGGCCTACCCGGACTACGTGTCGATCCGCGAGCTGGACGGCAAGGGCCGGGTGATCCGCGAGTGCCGCTTCATGGGCCTGTTCACCTCCTCGGTGTACAACGAGAGCGTCAACGACATTCCCTTCATCCGCGGCAAGGTCGCCGAA…	GTGTACGGCGAATATTCTCGGGAAAGCATTGTCTGCCTGCTCGCCATACTATTATCCGGCCATCACTACTTATATATAGACCTGAAACAACCGGCGGCCTGGAATGCAGAGTTGTGCCGGCAGGTCGACTGCCGCCTGATCCTCGACTGCTCGACCACGCCGACGCCCGCCAACGGTCTTCCCTGCGTCCCGGTCAGGCACCTGCCTGCCGCTCCAGCCTCGGTCGCCCGGCCATGCTTCGCGGCGGACCAGATCGCCTACATCAACTTCTCCTCGGGCACCACCGGCCGCCCGAAAGCCATCGCCTGCACCCACGCCGGCATTACCCGTCTGTGCCTGGGCCAGTCGTTCCTCGCGTTCGCTCCGCAGATGCGCTTCCTGGTCAACTCGCCGCTGTCC…	TTGCTGGAAGAAGGTGCGGACGAGGTATTCGAGGAAATCCTCGCCGCCGCTACATCCTACTTCCAGACGCCAATCGCGCTCATTTCCATCCTCGACCACCAGCGCCAGTGGTTTCGCGCGAGCATCGGCCTCGATACCCGGCAGACGCCGCGACGGGATTCGTTCTGCGCCTACGCGATCCTGGGGAAGGGAGTCTTCGAGGTGGCCGACGCCACCCTCGACCCGCGCTTCCGGGACAATCCCTATGTGCAAGGCGAACCGCGCATCCGCTTCTACGCCGGGGCTCCGCTGGCCACCGCGGAGGGTCTCAACCTCGGCAGCCTCTGCGTCATCGACCGGGAACCACGCGGGCCGCTGTCCGAGCGCGACATCGCCATGCTCGAGCATTTCGCCCGCCTG…	ATGTCCCTGAGTGTCTTCGATCTGTTCAAGATCGGCATCGGGCCGTCCAGCTCCCACACCGTGGGGCCGATGCGTGCCGCCGCGCGCTTCGCCGAGGGGCTGAGGCGCGAGGGGTTGCTGGAGGCCACTGCCAGCGTCAAGGTCGAGCTGTACGGCTCGCTCGGCGCCACCGGCAAGGGCCACGGCAGCGACAAGGCGGTACTGCTCGGCCTGGAGGGCGAGCAGCCGGACACGGTGGATACCGCCGCGATTCCCGCCCGGCTCGATGCCATCCGTTCCAGCGGCGAGCTGCGCCTGCTCGGCGAGCGGCCGATCCGCTTCGTCGAGAAGGAACACCTGGCGCTGATCCGCAAGCCGCTGGCCTACCATCCCAACGGCATGATCTTCCGTGCCTTCGAC…	ATGAACAGAGTTTTCCTGACCCCGGCAGCCGTGGCGCTGTGCGGCGCGTCTTCCCTGAGCCTGGCCGAACCGGTCAGCCTTGCCGACCAGGTGGTGACCGCCACCCGTACCGCCCAGACCGCTTCCCAGAGCCTGGCGGCGGTGAGCGTCATCGACCGCGAGGATATCGAGCGCAGCCAGGCGCGCAGCGTGCCGGAGCTGTTGCGCCAGGTACCCGGCGTGTCGCTGGCGAACAACGGCGGTTTCGGCAAGAACACCACGCTGTTCCTGCGCGGCACCGAGTCCGACCATGTGCTGGTGCTGATCGACGGCATCAAGGTCGGCTCGGCCAGCGCTGGCCTCACCGCGTTCCAGGACTTGCCGGTGGAGCTGATCGAGCGCATCGAGGTGGTCCGCGGG…	GTGCGGGTGCTCAACTGGAGCTGGGGCATCCACCGCGTCGGCGCTCGCGACGTCGATGGCGACGAGGTGGATTCGCTGGTGCGCTCGGGGATTGCCATGAGCGGCTACGAGGAGTTGCTCGAGGAGTTCTTCCTCTGGCTGCGCAAGGAGCATCCGGACGTGCTGGTGGTCAACTCCGCCGGCAACGGCTCGTCCTACTCCGGTACCGACGAATACCGCCTGCCGTCCTCCTTCGTCACCGAGCAGTTGCTGGTGGTGGGCGGCCACCAGCGCAGCGAGCGCCAAGGCCTGGCGGTGGACGACCCGGCCTACGCGGTCAAGCGCAGCACCTCGAACGTCGACATGCGGGTGGATGTCACCGCCGCCGCCTGTACCCATGCCTCGACCCTGGAGCGGGAC…	TTGCAGGCAGCTTGCGCGTTCGGCCCACCCGGGCGGCTATTTCGCGCCTGCGACGAGCAAGGACGCGAGGCGTTGCTGCTGCTCGCGGCGGTCGATGCCGACGAAGCGTTCTGGCAGCGCGAATGGGCATTGCGGCGCTGCTGTGCGGAGAGCCTGCCGCGAGTATTGTCGTCGCCCCGGTTGCGTCGTCATGCCTTCCAGTTGTTCGCTCCGCCGCGCTGGCCGATGCGCAGCCTGCTGGATTGGGCGCCAGCGCACCTGCCGCTGGAACCGCAATGCGCGCTGGTCCTCCTGGAGCAACTTATCGATGCGGTTCGCGCCTTGCAGCGGCGCGGCGTACAGGGCTTGTGGCTGGCGCCGCGGCAGGTCCTGCTGGACGAGGGCGGGCGCCTGCTGTTC…	ATGTTCAACCCGGCCAACCAGACCCACTTCAGCCTCACCCTCGACGGCCTCCGCCACGACCTGCAGGTCCTCGCCTTCAACGGCCACGAAGGCATCAGTCGCCCCTACCGTTTCGAACTCGAACTGGTCGGAGAGCGCGCCGGCCTCGACCTCGAAACGTTCCTCCACCGGCCCGCCTTCCTCGCCTTCACCCCGCAGGGCCAGGGTGTCCACGGCCTGGTCTACGGCGCTGCCCAGGGCGATGCCGGCAAGCGCCTGACCCGCTATCGCCTCACCCTCGTCCCGCACCTGGCCTACCTCGCCCAGCGCAACAACCAGCGGATCTTCCAGCACCTCACGGTGCCGCAGATCGTCGCCCTGGTCCTCGAGGAGCACGGCATCCTCGCCGACGCCTACCGC…	GTGGCTCTCCATCGCCTGGCCTTTATCTTCCTGTGCCTGCCTCTCATGGCCAGCGCCGCCCCCTTCACCTCCCCCGGCGACCGCGACCTGATCCGCGACCGCCAGCAGCGCCTGCTGGACGAACAGCGCAAGCGCCTGGAGGAACTCCAGCAACTGCCCGGCAAGGGAGCGCCCGCCGCTGCGGATGCCTCCGGCGACGACGAGCGCTGCTTCGAGATCCGCCGCATCGAGCTGGAAGGCGCCGGGCACCTCGGCGAAAGCGCGCGTCGCCAACTGCTGGCTCCCTACCAGGGGCGCTGCCTGGGCGTCGGCCAGCTCAATGCGCTGCTCAAGGCCGTCACCGACCATTACCTGGATCGCGGCTACGTCACCACCCGCGCCTACCTGCCACAGCAGGAC…	ATGGGTGACCGGCACGACTACGTCGCTCTGGAATGGGTGAAAGGCGAGATCGCCGAAACCCTGAAACAGGCGCGCCAGGCGCTGGAAGCGTTCGTCGAGAACCCGCAGGACCCGACCCGCATGCGGTTCTGCCTGACCTACGTGCACCA---GGTGCAGGGCACCCTGCAGATGGTCGAGTTCTACGGCGCGGCCCTGCTCGCCGAGGAAATGGAGCAGTTGGTCCAGGCCTTGCTGGACGGTCGCGTGCCGAACCAGGGCGAGGCCCTGGAAGTGCTGATGCAGGCGATCCTGCAACTGCCGGTCTACCTCGACCGGATCCAGACCGCCCGGCGCGACCTGCCGATGGTGGTCCTGCCGCTGCTCAACGACCTGCGCGCCGCGCGCGGCGAGAAGCTG…
27	ATGACCTTCGACGCCGCGTTCCAGCAGCTCGGCGAGCGGATGGCCGGCGGGGCCCTGGCGGAAACGGCGCTGGCGCCGTTCACCCATCTGCTGATCGACGAGTTCCAGGATGTCTCGCCGCAGATCGTCCTCTGGCTACAGGCGTTGCACCGTCGCCTGGCGA---CCCAGGGCACCGCGCCGAGCCTGATGGCCATCGGCGACGACTGGCAGTCGATCTACGGCTGGCGCGGCAGTTCGCCGGAGCTGTTCATCGACTTCGACCGGCACTTCCCCTCGCGTGGGCGGGGACGCAAGAGCGCGCTGCTGGTGCTGGAAACCAACTACCGCTCCGTCGAACCGATCATTCGCGACGGCGAGAAGGTGCTGGCCGGGGTGCGTTTCAAGCAGGACAAGACC…	ATGCACCTGTTGCGCACCCAACCCGGCGGCTTCGTTCCCGACGACGGCATCGCCCACCTGGCCCAGACTCCCGCCGAGCTGGTGATCCTCTGCAGCGGCGATTCGCACCTCGCATTGCTGGCCGAGGCCGCCCGTGCGCTGCCGGACGACTACCCGAGCCTGCGCCTGGCCAACCCCATGCAGTTGCAGAACCACGCCTCGGTGGACCTCTACGTCGAGGAAGTGCTGCGGCACGCGCGGGTGATCCTGCTTTCGCTGCACGGCGGCATCGGCTACTGGCGCTACGGCGTGGAGCAACTGGTGGCGCTGGCCGAGCGCGGCGCGCTGCTGATCCCGGTGCCCGGCGACGACCGCCCCGACCCGGAGCTGAGCGCCCTTGGCAACCTGCCGGCGGAGCAG…	ATGTTCGAACGCATCATCCAATTCGCCATCGAGCAACGCTGGCTGGTCCTGCTGGCGGTGCTGGGGATGGCCGGGGTCGGCATCGGCAGCTACCAGAAGCTGTCCATCGACGCGGTCCCGGACATCACCAACGTCCAGGTGCAGATCAATACCGCCGCCCCCGGCTACTCGCCGCTGGAAGTGGAGCAGCGGATCACCTACCCGGTGGAGACCGTCATGGCCGGCCTGCCGGGTTTGCAGGAAACCCGTTCGCTGTCGCGGCCGGGGATTTCCCAGGTGACGGTGATCTTCGAGGAGGGCACCGACATCTACTTCGCCCGCCAGCAGGTCAACGAACGCCTGAGCACGGCGCGCGAGCAACTGCCGGAAGACATCTCGCCGACCCTCGGGCCGATCTCC…	ATGTCCTTCAACCTTTCCGCCTGGGCGTTGCAGAATCGCCAGATCGTCCTGTACCTGATGATCCTGCTTGGCGCGGTCGGCGCGCTGTCCTACAGCAAGCTGGGGCAGAGCGAAGACCCGCCGTTCACCTTCAAGGCCATGGTGGTGCAGACCAACTGGCCGGGCGCCAGCGCCGAAGAGGTGGCCCGGCAGGTCACCGAGCGTATCGAGAAGAAGCTGATGGAAACCGGCGACTACGATCGCATCGTGTCCTTCTCCCGCCCCGGCGTCTCGCAGGTGACCTTCATGGCCCGCGAGGACATCCATTCCAGCGAGATCCCCGAACTCTGGTACCAGATCCGCAAGAAGATCAGCGACATTCGCGCCACCTTGCCGCAAAGCATCCAGGGCCCGTTCTTC…	ATGCGCACCGAGCAACCGAAAGTCATCCACCTCAAGGACTATCAGGCGCCGGACTACCTGATCGACGAGACCCACCTGAAGTTCGAACTGTTCGAAGACCACAGCCTGGTACACGCCGAGTTGAAGCTGCGGCGCAACCCCGAGCGCGGCGCCGGCCTGCCGCCGCTGTTGCTGCATGGCCAGCAACTGGAGCTGCTGGCGCTCGAACTGGACGGCCAGGCGCTCGGCGCGGACGACTACCAACTGGACGACGAGCAGCTCGGGGTGCAACCGCGGCAGGCCGAATTCGTCCTCAGGAGCACGGTGCGTATCCATCCGGAGAGCAACACCGCGCTGGAAGGCCTGTACAAGTCCGGCAAGATGTTCTGCACCCAGTGCGAGGCCGAGGGTTTCCGCAAG…	ATGACCGATAACCTGAACCTCGGCGCCATCGACCTGGGCACCGACGACGAATTCATCGCCCGCCATATCGGCCCGCGTGCCGCCGACACCCAGGCCATGCTCCAGCGCCTGGGCTACGACTCGCTGGACGCGCTGATCGGCAACGTGATCCCCGACAGCATCAAGGGCAGCAGCGTGCTCGACCTGCCGGCCGGCATGGGCGAGGCCGAGGCGCTGGCCAGCCTGAAGGCGATCGCCGCGCGCAATCGCGCGTTGCGTTCCTTCATCGGCCAGGGCTACTACAACTGCCACACCCCGGCACCGATCCTGCGCAACCTCCTGGAGAACCCGGCCTGGTACACCGCCTACACGCCGTACCAGCCGGAAATCTCCCAGGGCCGCCTGGAGGCGCTGCTGAAC…	GCAGGTTTCCCATGACGAGCTGGTCGCTCGCCTGTCCATGGTCGGCCTCGAGGTCGACGCCGACCTGCCGGTCGCCGGCGCCTTCAGCGGCGTGGTGGTCGGCGAGGTGCTCTCGACCGAACAGCATCCGGACGCCGACAAGCTGCGCGTCTGCCAGGTCAGCAACGGCAGCGAGACCTTCCAGGTCGTCTGCGGCGCGCCCAACGTGCGCGCGGGCCTGAAGATTCCCTTCGCCATGATCGGCGCCGAACTGCCGGGCGACTTCAAGATCAAGAAAGCCAAGCTGCGTGGCGTCGAGTCCTTCGGCATGCTCTGCTCGGCCAAGGAATTGCAGATCAGCGAAGAGAACGCCGGTCTGCTCGAGCTGCCGGCTGACGCGCCGGTCGGCCAGGACGTCCG…	ATGAGCGAGAACAACACGTACGACTCTTCCAGCATCAAGGTGCTGAAGGGGCTGGATGCCGTACGCAAGCGCCCCGGCATGTACATCGGCGACACCGACGATGGCACCGGTCTGCACCACATGGTGTTCGAGGTGGTGGATAACTCCATCGACGAAGCGCTGGCCGGTTACTGCAGCGAAATCAGCATCACCATCCATACGGATGAGTCGATCACTGTCCGCGACAATGGACGCGGTATTCCGGTGGATATCCACAAGGAAGAAGGGGTTTCTGCGGCGGAAGTGATCATGACCGTCCTCCACGCCGGCGGCAAGTTCGACGACAACACCTACAAGGTGTCCGGCGGCTTGCACGGTGTGGGCGTCTCGGTGGTGAACGCGCTGTCCCATGAACTACGC…	ATGCTGATCCTGCGCGGCGCTCCCGCCCTTTCCGCTTTCCGCCACGGCAAACTGCTCGAGCAACTGACCCAGCACGTACCTGCCGTTACCGGGCTGTACGCTGAGTTCGCGCATTTCGCCGACGTCACCGGCGCGCTCACCGCCGACGAGGAGCAGGTGCTGGCGCGGCTGCTGAAATACGGCCCGAGCGTGCCGGTGCAGGAGCCCAGCGGCCGGCTGTTCCTGGTGGTGCCGCGCTTCGGCACCATCTCGCCGTGGTCGAGCAAGGCCTCCGACATCGCCCGCAACTGCGGCCTGGCGAAGATCGACCGGCTGGAGCGCGGCATTGCCTACTATGTGCAGGGCGAACTGTCCGAGAGCGACGCCCAGCAGGTCGCCGCCCGCCTGCATGACCGCATG…	ATGAGTGGCCGCTCCGCTGGTTTCGCCCTGCCCAGCCGCGACGAGTGGCGGCGCGCGCTGGCCGAGTGGGCGCGCAGCGACGGGGCGACCTGGATCTACGTGTTCAAGGTGCTCTGCGCGGCCTTCCTGACCCTCTGGCTGGCGATGCGTCTGGAATTGCCGCAGCCGAGCACGGCGACCATCACCGTGTTCATCGTCATGCAGCCGCAGAGCGGCCAGGTGTTCGCCAAGAGCTTCTACCGCATCCTCGGCACCCTGGTCGGCCTCAGCGTGATGGTCACCCTGATCGCCCTGTTCGCCCAGGAGCGAGTGCTGTTCCTGCTCAGCTCGGCGATCTGGATCGGCCTCTGCACCGCCGGGGCCGCCCGCTACCGTGACTTCCGCTCCTACGCCTGCGTG…	ATGAGCGAATCCCTCGATCTGAGCCTGGAAGGGGTCGAACGCCGGTCGTTGGCCGAGTTCACCGAGCAGGCCTATCTGAACTATTCCATGTACGTGATCATGGACCGCGCCCTGCCGCATATCGGCGACGGCCTGAAACCGGTGCAGCGACGCATCGTCTACGCCATGAGCGAACTGGGGCTGGATGCCGATTCCAAGCACAAGAAGTCGGCGCGCACCGTCGGCGACGTGCTCGGCAAGTTCCACCCGCACGGCGACTCGGCCTGCTACGAGGCCATGGTGCTGATGGCGCAGCCGTTCTCCTATCGCTATCCGCTGGTGGACGGCCAGGGCAACTGGGGGGCGCCGGACGATCCCAAGTCCTTCGCCGCCATGCGTTATACCGAGGCGCGCCTGTCG…	ATGTCTTCACGCAAGATCGGGCTCAACCTGGTGGTCATCGTCGCCCTGGCCGCCCTCTTCACCGGCATCTGGGCCCTGTACAACCGTCCGGTCAGCGTACCGGACTGGCCGGAACGCATCTCCGGCTTCTCCTTCTCGCCGTTCCGCCTCAACCAGAACCCGCAGAGCGGCCGCTACCCCAGCGCCGAACAGATGCGCACCGACCTGGAACTGGTCGCCCGGCACACCCACAGCATCCGCACCTATTCGGTCCAGGGCGCGCTCGGCGACATCCCGGCGCTGGCCGAGGCGTTCGGCCTGCGCGTCAGCCTGGGCATCTGGCTCGGCCCGGACCTGGCCGGCAACGAGGCCGAGATCGCCCGCGCCATCCGCATCGCCAACGAGTCGCCGAGCGTGGTG…	ATGACCGCCATGCCCGAAGTACTTCGCGAAGATACGCTGAACATCCCCGACAGCCGTGGGCTGAATCTCTACACCTGCGATCCGGCCCTGGAGCGGCTGCTGGAGGTATACCTGCCGCCGGCGTTGCTCGCCGAATGGCGGCCGCTCCTCGAACGGCTCGGCGCCCGTGCCGGCGGCGAGCTGGACGTGCTGGCGCTGGCGGCGGACAAGAATCCGCCGGTGCTGGCGCCGCGCACCCGCCGCGGCGAGGATTTGCAGAGCATTCGCAAGCATCCGGACTACGTCGCCCTCGAACAGGTGGCCTATGCCGAACTTGGCCTGGCTTCCATGAGCCATCGCCCGGACGGCCCGCCGCCGCTGGTGAAGTATGCGCTCACCCACCTGTTCGTACAGGCCGAG…	ATGTCCGAATTCTTCATCAAGCGGCCGAACTTCGCCTGGGTGGTGGCCCTGTTCATCTCCCTGGCCGGCCTGCTGGTCATTTCCAAATTGCCGGTAGCGCAGTACCCCAATGTCGCGCCGCCACAGATCACCATCACCGCCACCTATCCCGGCGCCTCGGCGAAGGTGCTGGTGGACTCCGTCACCAGTGTGCTCGAGGAGTCGCTGAACGGCGCCAAGGGCCTGCTCTACTTCGAGTCGACCAACAACTCCAACGGCACCGCCGAGATCGTCGTCACCTTCGAGCCGGGCACCGATCCGGACCTGGCCCAGGTGGACGTGCAGAACCGCCTGAAGAAAGCCGAGGCGCGCATGCCGCAGGCGGTGCTGACCCAGGGCCTGCAGGTCGAGCAGACCAGC…	ATGAGCCAGCAGCAGATGCCCGTGGCCCTCGATCCGCTGGACTTCCCGTTGCACGGCAGCCGCCTGATCGAGGCCAGCGCCGGTACCGGCAAGACGTTCACCATCGCCCTGCTATACGTACGTCTGGTCCTCGACCATGGCGGCGAGAACGCTTTCGGCCGGCCGCTGAGCCCGCCGGAAATCCTCGTGGTGACCTTCACCGATGCGGCGACCCAGGAACTCCGCGAGCGTATCCGCAGCCGCCTGGGCGAAGCGGCGCGTTGTTTCGCCGAGCCGCAGGAGCGCCACGACGGCCTGCTGGTCGCGTTGCGCCAGCAGTATCCCGCCGAGCGCTGGCCGGGCTGCGCGCGCCTGCTGCGCCTGGCCGCGGAGTGGATGGACGAGGCCGCGGTATCGACC…	ATGAGGCGCGCCAGCCTGCATATGTTGCTCTGCCAGTTCGCCATGGCCCTTGGCCTGCTCCTGAGCCTGGGCAGCGAGGCCTGGGCCGCCAGGCCGGCTCCGCAGGCGGCCGTCGACCTGGAAGCACCGCCCGCCCTGGCCGAGGACGCCAGCCTCGACCAGCTCAACGCGCAACTCGACCTGATCCGCCAGCGCGTCACCGCCGACGCCAGCGACGACCTCCTCGCCGAGTTGCGCCAGAGCGCGCTGCAAGTCCAGCGCCAGGCCGACGCCCTGCTCGCGCTGCGGGTGGCCGACATCGAGCGGCTCGACGATCAGTTGAAAGTGATCGGCCCGCCGCAGCCCGACGAGGCGGAAAGCCTCGCCGCCCAGCGCCAGGCCCTGACCCGGCAGAAGAAC…	CTGCTGTTCGCCGCAGTGGTCATCGGCTTCCCCCAGCGCGCCGGCGAATGGCTGCTGGCCGCGCAGACCTGGGCCTCGCAGACCGTCGGCTGGTACTACCTGCTGGCGATGACGCTGTACCTGATCTTCGTGGTGGTCACCGCGCTTTCCGGCTACGGCAAGATCAAGCTCGGTGCCGACCACGACGAGCCGGAATTCAGCTACCTGTCCTGGGCCGGCATGCTGTTCGCCGCCGGCATCAGCATCACCCTGTTCTTCTTCTGCGTATCCGAACCGCTGACCCACTTCCTCCAGCCGCCGCAAGGCGAGGCCGGTACCCAGGAAGCCGCGCGGCAGGCCATGGAACTGCTGTTCCTGCACTGGGGCCTGCACGGCTGGGGCGTATTCGCCCTGGTGGCG…	ATGGTCCAGGGCACCACCTCGGACGCCGGCAAGAGCACCCTGGTGACCGCGCTGTGCCGCTGGCTGGCCCGGCGCGGCGTCGCGGTGGTGCCGTTCAAGCCGCAGAACATGGCGCTGAACAGCGCGGTCACCGCCGACGGCGGCGAGATCGGCCGCGCCCAGGCGGTCCAGGCCCAGGCCTGCCGGCTGGCGCCGCACACCGACATGAACCCGGTGCTGCTCAAGCCGAACACCGACATCGGCGCCCAGGTGATCATCCATGGCCGCGCGGTGACCAGCATGGACGCCGCCGCCTACCACGACTACAAGCGCGTGGCGATGGAAGCGGTGCTGGCTTCCCATGGGCGGCTCGCCGCCGCCTACCGGGTGGTGATGGTGGAGGGCGCCGGCTCGCCGGCG…	ATGGCCAGCCTGTTCCTCGGCCGCAAGGAAATCGACGACGACCTGCTCGACGACATCGAGACGCGCCTGCTGACCGCCGACGTCGGCGTCGAGGCCACCACCCTGATCGTGCAGAACCTGACCAAGCGCGTGGCGCGCAAGGAGCTGGCCGACAGCGGCGCGCTGTACAAGGCGCTGCAGGAAGAGCTGGCCAGCCTGCTGCGCCCGGTGGAGCAGCCGTTGCAGGTCGACGTCGCGCGCGAGCCCTATGTGATCCTGGTGGTCGGGGTGAACGGCGTGGGCAAGACCACCACCATCGGCAAGCTGGCGAAGAAGCTGCAACTCGAGGGCAAGAAGGTCATGCTGGCCGCCGGCGACACCTTCCGCGCCGCCGCCGTGGAGCAGTTGCAGGTCTGGGGC…	TTGCGCATCGAGAACTTCGCACCCATCGACAGCCAGGGTTTCCGTTTCCTGCTCCGGCCAGGTGACGAACCTCTGCTCGCGCTCATCGATCGCGCCCTGCCGCATATTAGCGGGCGCTACGGCGACGAACTGTTGCGCAGCTGGAGCGCCGGGAGGCGCCTGCGCTTCGACGATCCCCGGGTGACGCTGTCGCCGGCGGAACAGCGTTGGCTCTCCGCGCACCCGGTCGTGCCGGTGGTGATCAACCATTCCCTTGGCGCGCTCGGACAAGTGGACAGCGAGGGGAAGCTGAGCGGTATCGGGCGTGATTACCTGGAACTGATCGGTAAGCGCAGTGGCCTGCGGTTTTCCTTCACTGGAGCACGCAACTTCGTCGAGACGAAAAGTCGACTGGATGCG…	CGAGCCACCGCCCGCAGACGACTACTACGAAGTCGACATGGATACCCTGGCCTACCTGGATGCCGCGCCCGAGCCTGACGTGGTCGTGGTGGAGGAGCCGCTGCCGGCGGCGAAGCCGGCCACCGGCCTGGCCGCGGAGTGGCTGGAGCTGTTCCCGCGGCTCGGCCTCGGCGGCCTGACCGCCAGCATCGGTGCCAACTGTACGCTGGTAGCTGCCGACGGCGACCACTGGCATCTGCATCTCGATCCGGGCCAGAGCGCGCTGTTCAACGCCACCCAGCAGCGGCGGCTGAACGATGCGCTGAACCAGCACCTGGGGCGCACCCTCAAACTGGAGGTGACCCTGCAGAAGCCTGAGCAGGAGACCCCGGCCCAGGCAGCGGCACGCCGGCGTGCCGA…	ATGTCGCAGACGCCGTCCCTCGCCCAGCTCCAGCCCGCCGATGCCTTCCTGCGCCGCCACCTCGGCCCCGATCCGGCGGAACAGCAGGCCATGCTGGACTTCCTCGGAGTTTCCACTCGCGCCGAACTGATCGTGCAGACGGTGCCGCCGGCGATCCGCCTCAACCGGCCGCTGGAACTGCCCGCTGCGCTCGACGAACAGGCCGCCCTGGCGCGCCTGCGCGGCTACGCCGGGCTCAACCAGCGCTGGACCAGCCTGATCGGCATGGGCTACTACGGCACCGTGACGCCGTCGGTGATCCTCCGCAACGTGCTGGAGAATCCCGGCTGGTACACTGCCTATACGCCCTACCAGCCGGAAATCGCCCAGGGCCGCCTGGAAGCGCTGCTGAATTTCCAG…	GTGATTCTCGCCGACGAGCAGGAAGAGTTCGGCGGCAGCCTGCTGGACACCCGCGAGACCCTCGACGGCAAGCCCGCCGCCGAGTGGGTCGCGGACGCCGTGGCCGAGCTGCAAGGCCTGCCGGAAGTCATCCTGCTACCGCGCTCCACGGTCAACGGCTACCACGACCACAACTTCCTCACCATCCACGAGCGGCGCACCGACCACCTCGGCGAGGTCGCCCCGCTCGGCCAGGTCCGCCAGCGCGTGCACCGCGTACGCGCCAAGCGCGTGGTACTGGCCGCCGGCGCCCATGAGCGGCCGCTGGTCTACGGCAACAACGACCTGCCCGGCAACATGCTCGCCGGCGCGGTTTCCACCTATGTACGGCGCTACGGCGTGGCACCGGGCAAGAAACTG…	GTGCGCAGCTATCTCGAATGGCTGCTGGACAACCACTTCACCTTCCTCGGCTACGAGGAATTCAGCGTCGCCGACGAGGCCGACGGCGGGCGCATGGTCTACGACGAGAAATCCTTCCTCGGCCTGACCCGTCTGCTGCGTGCCGGCCTGAGCAAGGATGACCTGCACATCGAGGACTATGCCGTCGCCTACCTGCGCGAACCGGTCCTGCTGTCCTTCGCCAAGGCTGCCCATCCGAGCCGTGTGCACCGCCCGGCCTACCCGGACTACGTGTCGATCCGCGAGCTGGACGGCAAGGGCCGGGTGATCCGCGAGTGCCGCTTCATGGGCCTGTTCACCTCCTCGGTGTACAACGAGAGCGTCAACGACATCCCCTTCATCCGCGGCAAGGTCGCCGAA…	GTGTACGGCGAATATTCTCGGGAAAGCATTGTCTGCCTGCTCGCCATACTATTATCCGGCCATCACTACTTATATATAGACCTGAAACAACCGGCGGCCTGGAATGCAGAGTTGTGCCGGCAGGTCGACTGCCGCCTGATCCTCGACTGCTCGACCACGCCGACGCCCGCCAACGGTCTTCCCTGCGTCCCGGTCAGGCACCTGCCTGCCGCTCCAGCCTCGGTCGCCCGGCCATGCTTCGCGGCGGACCAGATCGCCTACATCAACTTCTCCTCGGGCACCACCGGCCGCCCGAAAGCCATCGCCTGCACCCACGCCGGCATTACCCGTCTGTGCCTGGGCCAGTCGTTCCTCGCGTTCGCTCCGCAGATGCGCTTCCTGGTCAACTCGCCGCTGTCC…	TTGCTGGAAGAAGGTGCGGACGAGGTATTCGAGGAAATCCTCGCCGCCGCTACGTCCTACTTCCAGACGCCCATCGCGCTCATTTCCATCCTCGACCACCAGCGCCAGTGGTTTCGCGCGAGCATCGGCCTCGATACCCGGCAGACGCCGCGACGGGATTCGTTCTGCGCCTACGCGATCCTGGGGAAGGGAGTCTTCGAGGTGGCCGACGCCACCCTCGACCCGCGCTTCCGGGACAATCCCTATGTGCAAGGCGAACCGCGCATCCGCTTCTACGCCGGGGCTCCGCTGGCCACCGCGGAGGGTCTCAACCTCGGCAGCCTCTGCGTCATCGACCGGGAACCACGCGGGCCGCTGTCCGAGCGCGACATCGCCATGCTCGAGCATTTCGCCCGCCTG…	ATGTCCCTGAGTGTCTTCGATCTGTTCAAGATCGGCATCGGGCCGTCCAGCTCCCACACCGTGGGGCCGATGCGTGCCGCCGCGCGCTTTGCCGAGGGGCTGAGGCGCGAGGGGTTGCTGGAGGCCACTGCCAGCGTCAAGGTCGAGCTGTACGGCTCGCTCGGCGCCACCGGCAAGGGCCACGGCAGCGACAAGGCGGTACTGCTCGGCCTGGAGGGCGAGCAGCCGGACACGGTGGATACCGCCGCGATTCCCGCTCGGCTCGATGCCATCCGTTCCAGCGGCGAGCTGCGCCTGCTCGGCGAGCGGCCGATCCGCTTCGTCGAGAAGGAACACCTTGCGCTGATCCGCAAGCCGCTGGCCTACCATCCCAATGGCATGATCTTCCGTGCCTTCGAC…	ATGAACAGAGTTTTCCTGACCCCGGCAGCCGTGGCGCTGTGCGGCGCGTCTTCCCTGAGCCTGGCCGAACCGGTCAGCCTTGCCGACCAGGTGGTGACCGCCACCCGTACCGCCCAGACCGCTTCCCAGAGCCTGGCGGCAGTGAGCGTCATCGACCGCGAGGATATCGAGCGCAGCCAGGCGCGCAGCGTGCCGGAGCTGTTGCGCCAGGTACCCGGCGTGTCGCTGGCGAACAACGGCGGTTTCGGCAAGAACACCACGCTGTTCCTGCGCGGCACCGAGTCCGACCATGTACTGGTGCTGATCGACGGCATCAAGGTCGGCTCGGCCAGCGCCGGCCTCACCGCGTTCCAGGATTTGCCGGTGGAGCTGATCGAGCGCATCGAGGTGGTCCGCGGG…	GTGCGGGTGCTCAACTGGAGCTGGGGCATCCACCGCGTCGGCGCTCGCGACGTCGATGGCGACGAGGTGGATTCGCTGGTGCGCTCGGGGATTGCCATGAGCGGCTACGAGGAGTTGCTCGAGGAGTTCTTCCTCTGGCTGCGCAAGGAGCATCCGGACGTGCTGGTGGTCAACTCCGCCGGCAACGGCTCGTCCTACTCCGGTACCGACGAATACCGCCTGCCGTCCTCCTTCGTTACCGAGCAGTTGCTGGTGGTGGGCGGCCACCAGCGCAGCGAGCGCCAAGGCCTGGCGGTGGACGACCCGGCCTACGCGGTCAAGCGCAGCACCTCGAACGTCGACATGCGGGTGGATGTCACCGCCGCCGCCTGTACCCATGCCTCGACCCTGGAGCGGGAC…	TTGCAGGCGGCTTGCGCGTTCGGCCCGCCCGGGCGGCTGTTCCGCGCCTGCGACGAGCAAGGACGCGAGGCGTTGCTGCTGCTCGCGGCGGCCGATGCCGACGAAGCGTTCTGGCAGCGCGAATGGGCACTGCGGCGCTGCCGTGCGGAGAGCCTGCCGCGAGTATTGTCGTCGCTCCGGTTGCGTCGTCATGCCTTCCAGTTGTTCGCTCCGCCGCGCTGGCCGATGCGCAGCCTGCTGGATTGGGCGCCAGCGCACCTGCCGCTGGAACCGCAATGCGCGCTGGTCCTCCTGGAGCAACTTATCGATGCGGTTCGCGCCTTGCAGCGGCGCGGTGTACAGGGCTTGTGGCTGGCGCCGCGGCAGATCCTGCTGGACGAGGGCGGGCGCCTGCTGTTC…	ATGTTCAACCCGGCCAACCAGACCCACTTCAGCCTCAGCCTCGACGGCCTCCGTCACGACCTGCAGGTTCTCGAATTCAGCGGCCACGAAGGCATCAGTCGCCCCTACCGTTTCGAACTCGAACTGGTCGGAGAGCGTGCCGGCCTCGACCTCGAAACGTTCCTCCACCGGCCCGCCTTCCTCGCCTTCACCCCGCAGGGCCAGGGTGTCCACGGCCTGGTCTACGGCGCTGCCCAGGGCGATGCCGGCAAGCGCCTGACCCGCTATCGCCTCACCCTCGTCCCACACCTGGCCTACCTCGCCCAGCGCAACAACCAGCGGATCTTCCAGCACCTCACGGTGCCGCAGATCGTCGCCCTGATCCTCGAGGAGCACGGCATCCTCGCCGACGCCTACCGC…	GTGGCTCTCCATCGCCTGGCCTTTATCTTCCTGTGCCTGCCCCTCATGGCCAGCGCCGCCCCCTTCACCTCCCCCGGTGACCGCGACCTGATCCGCGACCGCCAGCAGCGCCTGCTGGACGAACAGCGCAAGCGCCTGGAGGAACTCCAGCAACTGCCCGGCAAGGGAGCGCCCGCCGCTGCGGATGCCTCCGGCGGCGACGAGCGCTGCTTCGAGATCCGCCGCATCGAGCTGGAAGGCGCCGGGCACCTCGGCGAAAGCGCGCGTCGCCAACTGCTGGCGCCCTACCAGGGGCGCTGCCTGGGCGTCGGCCAGCTCAATGCGCTGCTCAAGGCCGTCACCGACCATTACCTGGATCGCGGCTACGTCACCACCCGTGCCTACCTGCCACAGCAGGAC…	ATGGGTGACCGGCACGACTACGTCGCTCTGGAGTGGGTGAAAGGCGAGATCGCCGAAACCCTGAAACAGGCGCGCCAGGCGCTGGAAGCGTTCGTCGAGAACCCGCAGGACCCGACCCGCATGCGGTTCTGCCTGACCTACGTGCACCA---GGTGCAGGGCACCCTGCAGATGGTCGAGTTCTACGGCGCGGCCCTGCTCGCCGAGGAAATGGAGCAGTTGGTCCAGGCCTTGCTGGACGGTCGCGTGCCGAACCAGGGCGAGGCCCTGGAAGTGCTGATGCAGGCGATCCTGCAACTGCCGGTCTACCTCGACCGGATCCAGACCGCCCGGCGCGACCTGCCGATGGTGGTCCTGCCGCTGCTCAACGACCTGCGCGCCGCGCGCGGCGAGAAGCTG…
28	ATGACCTTCGACGTCGCGTTCCAGCAGCTCGGCGAGCGGATGGCCGGCGGGGCCCTGGCGGAAACGGCGCTGGCGCCGTTCACCCATCTGCTGATCGACGAGTTCCAGGATGTCTCGCCGCAGATCGTCCTCTGGCTACAGGCGTTGCACCGTCGCCTGGCGA---CCCAGGGCACCGCGCCGAGCCTGATGGCCATCGGCGACGACTGGCAGTCGATCTACGGCTGGCGCGGCAGTTCGCCGGAGCTGTTCATCGACTTCGACCGGCACTTCCCCTCGCGTGGGCGGGGACGCAAGAGCGCGCTGCTGGTGCTGGAAACCAACTACCGCTCCGTCGAACCGATCATTCGCGACGGCGAGAAGGTGCTGGCCGGGGTGCGTTTCAAGCAGGACAAGACC…	ATGCACCTGTTGCGCACCCAACCTGGCGGCTTCGTTCCCGACGACGGCATCGCCCACCTGGCCCAGACTCCCGCCGAGCTGGTGATCCTCTGCAGCGGCGATTCGCACCTGGCATTGCTGGCCGAGGCCGCCCGTGCGCTGCCGGACGACTACCCGAGCCTGCGCCTGGCCAACCCCATGCAGTTGCAGAACCACGCCTCGGTGGACCTCTACGTCGACGAAGTGCTGCGGCACGCGCGGGTGATCCTGCTTTCGCTGCACGGCGGCATCGGCTACTGGCGCTACGGCGTGGAGCAACTGGTGGCGCTGGCCGAGCGCGGCGCGCTGCTGATCCCGGTGCCCGGCGACGACCGCCCCGACCCGGAGCTGAGCGCCCTCGGCAACCTGCCGGCGGAGCAG…	ATGTTCGAACGCATCATCCAATTCGCCATCGAGCAACGCTGGCTGGTCCTGCTGGCGGTGCTGGGGATGGCCGGGGTCGGCATCGGCAGCTACCAGAAGCTGTCCATCGACGCGGTCCCGGACATCACCAACGTCCAGGTGCAGATCAATACCGCCGCCCCCGGCTACTCGCCGCTGGAAGTGGAGCAGCGGATCACCTACCCGGTGGAGACCGTCATGGCCGGCCTGCCGGGTTTGCAGGAAACCCGTTCGCTGTCGCGGCCGGGGATTTCCCAGGTGACGGTGATCTTCGAGGAGGGCACCGATATCTACTTCGCCCGCCAGCAGGTCAACGAACGCCTGAGCACGGCGCGCGAGCAACTGCCGGAAGACATCTCGCCGACCCTCGGGCCGATCTCC…	ATGTCATTCAACCTTTCCGCCTGGGCGTTGCAGAATCGCCAGATCGTCCTGTACCTGATGATCCTGCTTGGCGCGGTCGGCGCGCTGTCCTACAGCAAGCTGGGGCAGAGCGAAGACCCGCCGTTCACCTTCAAGGCCATGGTGGTGCAGACCAACTGGCCGGGCGCCAGCGCCGAAGAGGTGGCCCGGCAGGTCACCGAGCGTATCGAGAAGAAGCTGATGGAAACCGGCGACTACGATCGCATCGTGTCCTTCTCCCGCCCCGGCGTCTCGCAGGTGACCTTCATGGCCCGCGAGGACATCCATTCCAGCGAGATCCCCGAACTCTGGTACCAGATCCGCAAGAAGATCAGCGACATTCGCGCCACCTTGCCGCAAAGCATCCAGGGCCCGTTCTTC…	ATGCGCACCGAGCAACCGAAAGTCATCCACCTCAAGGACTATCAGGCGCCGGACTACCTGATCGACGAGACCCACCTGAAGTTCGAACTGTTCGAAGACCACAGCCTGGTACACGCCGAGCTGAAGCTGCGGCGCAACCCCGAGCGCGGCGCCGGCCTGCCGCCGCTGTTGCTGCATGGCCAGCAACTGGAGCTGCTGGCGCTCGAACTGGACGGCCAGGCGCTCGGCGCGGACGACTACCAGCTGGACGACGAGCAGCTCGGGGTGCAACCGCGGCAGGCCGAATTCGTCCTCAGGAGCACGGTGCGTATCCATCCGGAGAGCAACACCGCGCTGGAAGGCCTGTACAAGTCCGGCAAGATGTTCTGCACCCAGTGCGAGGCCGAGGGTTTCCGCAAG…	ATGACCGATAACCTGAACCTCGGCGCCATCGACCTGGGCACCGACGACGAATTCATCGCCCGCCATATCGGCCCGCGTGCCGCCGACACCCAGGCCATGCTCCAGCGCCTGGGCTACGACTCGCTGGACGCGCTGATCGGCAACGTGATCCCCGACAGCATCAAGGGCAGCAGCGTGCTCGACCTGCCGGCCGGCATGGGCGAGGCCGAGGCGCTGGCCAGCCTGAAGGCGATCGCCGCGCGCAATCGCGCGTTGCGTTCCTTCATCGGCCAGGGCTACTACAACTGCCACACCCCGGCACCGATCCTGCGCAACCTCCTGGAGAACCCGGCCTGGTACACCGCCTACACGCCGTACCAGCCGGAAATCTCCCAGGGCCGCCTGGAGGCGCTGCTGAAC…	GCAGGTTTCCCATGACGAGCTGGTCGCTCGCCTGTCCATGGTCGGCCTCGAGGTCGACGCCGACCTGCCGGTCGCCGGCGCCTTCAGCGGCGTGGTGGTCGGCGAGGTGCTCTCGACCGAACAGCATCCGGACGCCGACAAGCTGCGCGTCTGCCAGGTCAGCAACGGCAGCGAGACCTTCCAGGTCGTCTGCGGCGCGCCCAACGTGCGCGCGGGCCTGAAGATTCCCTTCGCCATGATCGGCGCCGAACTGCCGGGCGACTTCAAGATCAAGAAAGCCAAGCTGCGTGGCGTCGAGTCCTTCGGCATGCTCTGCTCGGCCAAGGAATTGCAGATCAGCGAAGAGAACGCCGGTCTGCTCGAGCTGCCGGCCGACGCGCCGGTCGGCCAGGACGTCCG…	ATGAGCGAGAACAACACGTACGACTCTTCCAGCATCAAGGTGCTGAAGGGGCTGGATGCCGTACGCAAGCGCCCCGGCATGTACATCGGCGACACCGACGATGGCACCGGTCTGCACCACATGGTGTTCGAGGTGGTGGATAACTCCATCGACGAAGCGCTGGCCGGTTACTGCAGCGAAATCAGCATCACCATCCATACGGATGAGTCGATCACTGTCCGCGACAATGGACGCGGTATTCCGGTGGATATCCACAAGGAGGAAGGGGTTTCTGCGGCGGAAGTGATCATGACCGTCCTCCACGCCGGCGGCAAGTTCGACGACAACACCTACAAGGTGTCCGGCGGCTTGCACGGTGTGGGCGTCTCGGTGGTGAACGCGCTGTCCCATGAACTACGC…	ATGCTGATCCTGCGCGGCGCTCCCGCCCTTTCCGCTTTCCGCCACGGCAAACTGCTCGAGCAACTGACCCAGCACGTACCTGCCGTTACCGGGCTGTACGCTGAGTTCGCGCATTTCGCCGACGTCACCGGCGCGCTCACCGCCGACGAGGAGCAGGTGCTGGCGCGGCTGCTGAAATACGGCCCGAGCGTGCCGGTGCAGGAGCCCAGCGGACGGCTGTTCCTGGTGGTGCCGCGCTTCGGCACCATCTCGCCGTGGTCGAGCAAGGCCTCCGACATCGCCCGCAACTGCGGCCTGGCGAAGATCGACCGGCTGGAGCGCGGCATTGCCTACTATGTGCAGGGCGAACTGTCCGAGAGCGACGCCCAGCAGGTCGCCGCCCGCCTGCATGACCGCATG…	ATGAGTGGCCGCTCCGCTGGTTTCGCCCTGCCCAGCCGCGACGAGTGGCGGCGCGCGCTGGCCGAGTGGGCGCGCAGCGACGGGGCGACCTGGATCTACGTGTTCAAGGTGCTCTGCGCGGCCTTCCTGACCCTCTGGCTGGCGATGCGTCTGGAATTGCCGCAGCCGAGCACGGCGACCATCACCGTGTTCATCGTCATGCAGCCGCAGAGCGGCCAGGTGTTCGCCAAGAGCTTCTACCGCCTCCTCGGCACCCTGGTCGGCCTCAGCGTGATGGTCACCCTGATCGCCCTGTTCGCCCAGGAGCGAGTGCTGTTCCTGCTCAGCTCGGCGATCTGGATCGGCCTCTGCACCGCCGGGGCCGCCCGCTACCGTGACTTCCGCTCCTACGCCTGCGTG…	ATGAGCGAATCCCTCGATCTGAGCCTGGAAGGGGTCGAACGCCGGTCGTTGGCCGAGTTCACCGAGCAGGCCTATCTGAACTATTCCATGTACGTGATCATGGACCGCGCCCTGCCGCATATCGGCGACGGCCTGAAACCGGTGCAGCGACGCATCGTCTACGCCATGAGCGAACTGGGGCTGGATGCCGATTCCAAGCACAAGAAGTCGGCGCGCACCGTCGGCGACGTGCTCGGCAAGTTCCACCCGCACGGCGACTCGGCCTGCTACGAGGCCATGGTGCTGATGGCGCAGCCGTTCTCCTATCGCTATCCGCTGGTGGACGGCCAGGGCAACTGGGGGGCGCCGGACGATCCCAAGTCCTTCGCCGCCATGCGTTATACCGAGGCGCGCCTGTCG…	ATGTCTTCACGCAAGATCGGGCTCAACCTGGTGGTCATCGTCGCCCTGGCCGCCCTCTTCACCGGCATCTGGGCCCTGTACAACCGTCCGGTCAGCGTACCGGACTGGCCGGAACGCATCTCCGGCCTCTCCTTCTCGCCGTTCCGCCTCAACCAGAACCCGCAGAGCGGCCGCTACCCCAGCGCCGAACAGATGCGCACCGACCTGGAACTGGTCGCCCGGCACACCCACAGCATCCGCACCTATTCGGTCCAGGGCGCGCTCGGCGACATCCCGGCGCTGGCCGAGGCGTTCGGCCTGCGCGTCAGCCTGGGCATCTGGCTCGGCCCGGACCTGGCCAGCAACGAGGCCGAGATCGCCCGCGCCATCCGCATCGCCAACGAGTCGCCGAGCGTGGTG…	ATGACCGCCATGCCCGAAGTACTTCGCGAAGATACGCTGAACATCCCCGACAGCCGTGGGCTGAATCTCTACACCTGCGATCCGGCCCTGGAGCGGCTGCTGGAGGTATACCTGCCGCCGGCGTTGCTCGCCGAATGGCGGCCGCTCCTCGAACGGCTCGGCGCTCGTGCCGGCGGCGAGCTGGACGTGCTGGCGCTGGCGGCGGACAAGACCCCGCCGGTGCTGGCGCCGCGCACCCGCCGCGGCGAGGATTTGCAGAGCATTCGCAAGCATCCGGACTACGTCGCCCTCGAACGGGTGGCCTATGCCGAACTCGGCCTGGCTTCCATGAGCCATCGCCCGGACGGCCCGCCGCCGCTGGTGAAGTATGCGCTCACCCACCTGTTCGTACAGGCCGAG…	ATGTCCGAATTCTTCATCAAGCGGCCGAACTTCGCCTGGGTGGTGGCCCTGTTCATCTCCCTGGCCGGCCTGCTGGTCATTTCCAAATTGCCGGTAGCGCAGTACCCCAATGTCGCGCCGCCACAGATCACCATCACCGCCACCTATCCCGGCGCCTCGGCGAAGGTGCTGGTGGACTCCGTCACCAGTGTGCTCGAGGAGTCGCTGAACGGCGCCAAGGGCCTGCTCTACTTCGAGTCGACCAACAACTCCAACGGCACCGCCGAGATCGTCGTCACCTTCGAGCCGGGCACCGATCCGGACCTGGCCCAGGTGGACGTGCAGAACCGCCTGAAGAAAGCCGAGGCGCGCATGCCGCAGGCGGTGCTGACCCAGGGCCTGCAGGTCGAGCAGACCAGC…	ATGAGCCAGCAGCAGATGCCCGTGGCCCTCGATCCGCTGGATTTCCCGTTGCACGGCAGCCGCCTGATCGAGGCCAGCGCCGGTACCGGCAAGACGTTCACCATCGCCCTGCTATACGTACGCCTGGTCCTCGACCATGGCGGCGAGAACGCTTTCGGCCGGCCGCTGAGCCCGCCGGAAATCCTCGTGGTGACCTTCACCGATGCGGCGACCCAGGAACTCCGCGAGCGTATCCGCAGCCGCCTGGGCGAAGCGGCGCGTTGTTTCGCCGAGCCGCAGGAGCGCCACGACGGCCTGCTGGTCGCGTTGCGCCAGCAGTATCCCACCGAGCGCTGGCCGGGCTGCGCGCGCCTGCTGCGCCTGGCCGCGGAGTGGATGGACGAGGCCGCGGTATCGACC…	ATGAGGCGCGCCAGCCTGCATATGTTGCTCTGCCAGTTCGCCATGGCCCTGGGCCTGCTCCTGAGCCTGGGCAGCGAGGCCTGGGCCGCCAGGCCGGCTCCGCAGGCGGCCGTCGACCTGGAAGCGCCGCCCGCCCTGGCCGAGGACGCCAGCCTCGACCAGCTCAACGCGCAACTCGACCTGATCCGCCAGCGCGTTACCGCCGACGCCAGCGACGACCTCCTCGCCGAGTTGCGCCAGAGCGCGCTGCAAGTCCAGCGTCAGGCCGACGCCCTGCTCGCGCTACGGGTGGCCGACATCGAGCGGCTCGACGATCAGTTGAAAGTGATCGGCCCGCCGCAGCCCGACGAGGCGGAAAGCCTCGCCGCCCAGCGCCAGGCCCTGACCCGGCAGAAGAAC…	CTGCTGTTCGCCGCGGTGGTCATCGGCTTCCCCCAGCGCGCCGGCGAATGGCTGCTGGCCGCACAGACCTGGGCCTCGCAGACCGTCGGTTGGTACTACCTGCTGGCGATGACGCTGTACCTGATCTTCGTGGTGGTCACCGCGCTTTCCGGCTACGGCAAGATCAAGCTCGGTGCCGACCACGACGAGCCGGAATTCAGCTACCTGTCCTGGGCCGGCATGCTGTTCGCCGCCGGCATCAGCATCACCCTGTTCTTCTTCTGCGTATCCGAGCCGTTGACCCACTTCCTCCAGCCGCCGCAAGGCGAGGCCGGTACCCAGGAAGCCGCGCGGCAGGCCATGGAACTGCTGTTCCTGCACTGGGGCCTGCACGGCTGGGGCGTGTTCGCCCTGGTGGCG…	ATGGTCCAGGGCACCACCTCGGACGCCGGCAAGAGCACCCTGGTGACCGCGCTGTGCCGCTGGCTGGCCCGGCGCGGCGTCGCGGTGGTGCCGTTCAAGCCGCAGAACATGGCGCTGAACAGCGCGGTCACCGCCGACGGCGGCGAGATCGGCCGCGCCCAGGCGGTCCAGGCCCAGGCCTGCCGGCTGGCGCCGCACACCGACATGAACCCGGTGCTGCTCAAGCCGAACACCGACATCGGCGCCCAGGTGATCATCCATGGCCGCGCGGTGACCAGCATGGACGCCGCCGCCTACCACGACTACAAGCGCGTGGCGATGGAAGCGGTGCTGGCTTCCCATGGGCGGCTCGCCGCCGCCTACCGGGTGGTGATGGTGGAGGGCGCCGGCTCGCCGGCG…	ATGGCCAGCCTGTTCCTCGGTCGCAAGGAAATCGACGACGACCTGCTCGACGACATCGAGACGCGCCTGCTGACCGCCGACGTCGGCGTCGAGGCCACCACCCTGATCGTGCAGAATCTGACCAAGCGCGTGGCGCGCAAGGAACTGGCCGACAGCGGCGCGCTGTACAAGGCGCTGCAGGAAGAGCTGGCCAGCCTGCTGCGCCCGGTGGAGCAGCCGTTGCAGGTCGACGTCGCGCGCGAGCCCTATGTGATCCTGGTGGTCGGGGTGAACGGCGTGGGCAAGACCACCACCATCGGCAAGCTGGCGAAGAAGCTGCAACTCGAGGGCAAGAAGGTCATGCTGGCCGCCGGCGACACCTTCCGCGCTGCCGCCGTGGAGCAGTTGCAGGTCTGGGGC…	TTGCGCATCGAGAACTTCGCACCCATCGACAGCCAGGGTTTCCGTTTCCTGCTCCGGCCAGGTGACGAACCTCTGCTCGCGCTCATCGATCGCGCCCTGCCGCATATTAGCGGGCGCTACGGCGACGAACTGTTGCGCAGCTGGAGCGCCGGGAGGCGCCTGCGCTTCGACGATCCCCGGGTGACGCTGTCGCCGGCGGAACAGCGTTGGCTCTCCGCGCACCCGGTCGTGCCGGTGGTGATCAACCATTCCCTTGGCGCGCTCGGGCAACTGGATAACGAGGGGAGGCTGAGTGGTATCGGGCGTGACTATCTGGACCTGATCGGCAAGCGCAGTGGCCTGCGGTTTTCCTTCACTGGAGCACGCAACTTCGTCGAGACGAAAAGCCGACTGGATGCG…	CGAGCCACCGCCCGCAGACGACTACTACGAAGTCGACATGGATACCCTGGCCTACCTGGATGCCGCGCCCGAGCCTGACGTGGTCGTGGTGGAGGAGCCGCTGCCGGCGGCGAAGCCGGCCACCGGCCTGGCCGCGGAGTGGCTGGAGCTGTTCCCGCGGCTCGGCCTCGGCGGCCTGACCGCCAGCATCGGTGCCAACTGTACGCTGGTAGCTGCCGACGGCGACCACTGGCATCTGCATCTCGATCCGGGCCAGAGCGCGCTGTTCAACGCCACCCAGCAGCGGCGGCTGAACGATGCGCTGAACCAGCACCTGGGGCGCACCCTCAAACTGGAGGTGACCCTGCAGAAGCCTGAGCAGGAGACCCCGGCCCAGGCAGCGGCACGCCGGCGTGCCGA…	ATGTCGCAGACGCCGTCCCTCGCCCAGCTCCAGCCCGCCGATGCCTTCCTGCGCCGCCACCTCGGCCCCGATCCGGCGGAACAGCAGGCCATGCTGGACTTCCTCGGAGTTTCCACTCGCGCCGAACTGATCGTGCAGACGGTGCCGCCGGCGATCCGCCTCAACCGGCCGCTGGAACTGCCCGCCGCGCTCGACGAACAGGCCGCCCTGGCGCGCCTGCGCGGCTACGCCGGGCTCAACCAGCGCTGGACCAGCCTGATCGGCATGGGCTACTACGGCACAGTGACGCCGCCGGTGATCCTCCGCAACGTGCTGGAGAATCCCGGCTGGTACACCGCCTATACGCCCTACCAGCCGGAAATCGCCCAGGGCCGCCTGGAAGCGCTGCTGAATTTCCAG…	GTGATCCTCGCCGACGAGCAGGAAGAGTTCGGCGGCAGCCTGCTGGACACCCGCGAGACCCTCGACGGCAAGCCCGCCGCCGAGTGGGTCGCGGACGCCGTGGCCGAGCTGCAAGGCCTGCCGGAAGTCATCCTGCTACCGCGCTCCACGGTCAACGGCTACCACGACCACAACTTCCTCACCATCCACGAGCGGCGCACCGACCACCTCGGCGAGGTCGCCCCGCTCGGCCAGGTCCGCCAGCGTGTGCACCGCGTGCGCGCCAAGCGCGTGGTACTGGCCGCCGGCGCCCATGAGCGGCCGCTGGTCTACGGCAACAACGACCTGCCCGGCAACATGCTCGCCGGCGCGGTTTCCACCTATGTACGGCGCTACGGCGTGGCACCGGGCAAGAAACTG…	GTACGCAGCTATCTCGAATGGCTGCTGGACAACCACTTCACCTTCCTCGGCTACGAGGAATTCAGCGTCGCCGACGAGGCCGACGGCGGGCGCATGGTCTACGACGAGAAATCCTTCCTCGGCCTGACCCGTCTGCTGCGTGCCGGCCTGAGCAAGGATGACCTGCACATCGAGGACTATGCCGTCGCCTACCTGCGCGAACCGGTCCTGCTGTCCTTCGCCAAGGCTGCCCATCCGAGCCGTGTGCACCGCCCGGCCTACCCGGACTACGTGTCGATCCGCGAGCTGGACGGCAAGGGCCGGGTGATCCGCGAGTGCCGCTTCATGGGCCTGTTCACCTCCTCGGTGTACAACGAGAGCGTCAACGACATCCCCTTCATCCGCGGCAAGGTCGCCGAA…	GTGTACGGCGAATATTCTCGGGAAAGCATTACCTGTCTGCTCGCCATACTGTTATCCGGCCATCACTACTTATATATAGACCTGAAACAACCGGCGGCCTGGAATGCAGAGTTGTGCCGGCAGGTCGACTGCCGCCTGATTCTCGACTGCTCGACCACGCCGACGCCCGCCAACGGTCTTCCCTGCGTCCCGGTCAGGCACCTGCCTGCCGCTCCAGCCTCGGTCGCCCGGCCATGCTTCGCGGCGGACCAGATCGCCTACATCAACTTCTCCTCGGGCACCACCGGCCGCCCGAAAGCCATCGCCTGCACCCACGCCGGCATTACCCGCCTGTGCCTGGGCCAGTCGTTCCTCGCGTTCGCTCCGCAGATGCGCTTCCTGGTGAACTCGCCGCTGTCC…	CTGCTGGAAGAAGGTGCGGACGAGGTATTCGAGGAAATCCTCGCCGCCGCTACGTCCTACTTCCAGACGCCCATCGCGCTCATTTCCATCCTCGACCATCAGCGCCAGTGGTTTCGCGCGAGCATCGGCCTCGATATCCGGCAGACGCCGCGACGGGATTCGTTCTGCGCCTATGCGATCCTGGGCAAGGGAGTATTCGAGGTGGCCGACGCCACCCTCGACCCGCGCTTCCGGGACAACCCCTATGTGCAAGGCGAACCGCGCATCCGCTTCTACGCCGGGGCTCCGCTGGCCACCGCGGAAGGTCTCAACCTCGGCAGCCTCTGCGTCATCGACCGGGAACCACGCGGGCCGCTGGCCGAGCGGGACGTCGCCATGCTCGAGCACTTCGCCCGGCTG…	ATGTCCCTGAGTGTCTTCGATCTGTTCAAGATCGGCATCGGGCCGTCCAGCTCCCACACCGTGGGGCCGATGCGTGCCGCCGCGCGCTTCGCCGAGGGGCTGAGGCGCGAGGGGTTGCTGGAGGCCACTGCCAGCGTCAAGGTCGAGCTGTACGGCTCGCTCGGCGCCACCGGCAAGGGCCACGGCAGCGACAAGGCGGTACTGCTCGGCCTGGAGGGCGAGCAGCCGGACACGGTGGATACCGCCGCGATTCCCGCTCGGCTCGATGCCATCCGTTCCAGCGGCGAGCTGCGCCTGCTCGGCGAGCGGCCGATCCGCTTCGTCGAGAAGGAACACCTGGCGCTGATCCGCAAGCCGCTGGCCTACCATCCCAACGGCATGATCTTCCGTGCCTTCGAC…	ATGAACAGAGTTTTCCTGACCCCGGCAGCCGTGGCGCTGTGCGGCGCGTCTTCCCTGAGCCTGGCCGAACCGGTCAGCCTTGCGGACCAGGTGGTGACCGCCACCCGTACCGCCCAGACCGCTTCCCAGAGCCTGGCGGCGGTGAGCGTCATCGACCGCGAGGATATCGAGCGCAGCCAGGCGCGCAGCGTGCCGGAGCTGTTGCGCCAGGTACCCGGCGTGTCGCTGGCGAACAACGGCGGTTTCGGCAAGAACACCACGCTGTTCCTGCGCGGCACCGAGTCCGACCATGTGCTGGTGCTGATCGACGGCATCAAGGTCGGCTCGGCCAGCGCTGGCCTCACCGCGTTCCAGGACTTGCCGGTGGAGCTGATCGAGCGCATCGAGGTGGTCCGCGGG…	GTGCGGGTGCTCAACTGGAGCTGGGGCATCCACCGCGTCGGCGCTCGCGACGTCGACGGCGACGAGGTGGATTCGCTGGTGCGCTCGGGGATCGCCATGAGCGGCTACGAGGAGTTGCTCGAGGAGTTCTTCCTCTGGCTGCGCAAGGAGCATCCGGACGTGCTGGTGGTCAACTCCGCCGGTAACGGCTCGTCCTACTCCGGTACCGACGAATACCGCCTGCCGTCCTCCTTCGTCACCGAGCAGTTGCTGGTGGTGGGCGGCCACCAGCGCAGCGAGCGCCAAGGCCTGGCGGTGGACGACCCGGCCTACGCGGTCAAGCGCAGCACCTCGAACGTCGACATGCGGGTGGATGTCACCGCCGCCGCCTGTACCCATGCCTCGACCCTGGAGCGGGAC…	TTGCAGGCAGCTTGCGCGTTCGGCCCGCCCGGGCGGCTATTCCGCGCCTGCGACGAGCAAGGACGCGAGGCGTTGCTGCTGCTCGCGGCGGTCGATGCCGACGAAGCGTTCTGGCAGCGCGAATGGGCATTGCGGCGCTGCCGTGCGGAGAGCCTGCCGCGAGTATTGTCGTCGCCCCGGTTGCGTCGTCATGCCTTCCAGTTGTTCGCTCCGCCGCGCTGGCCGATGCGCAGCCTGCTGGATTGGGCGCCAGCGCACCTGCCGCTGGAACCGCAATGCGCGCTGGTCCTCCTGGAGCAACTTATCGATGCGGTTCGCGCCTTGCAGCGGCGCGGCGTACAGGGCTTGTGGCTGGCGCCGCGGCAGATCCTGCTGGACGAGGGCGGGCGCCTGCTGTTC…	ATGTTCAACCCGGCCAACCAGACCCACTTCAGCCTCACCCTCGACGGCCTCCGCCACGACCTGCAGGTCCTCGCCTTCAACGGCCACGAAGGCATCAGTCGCCCCTACCGTTTCGAACTCGAACTGGTCGGAGAGCGCGCCGGCCTCGACCTCGAAACGTTCCTCCACCGGCCCGCCTTCCTCGCCTTCACCCCGCAGGGCCAGGGTGTCCACGGCCTGGTCTACGGCGCTGCCCAGGGCGATGCCGGCAAGCGCCTGACCCGCTATCGCCTCACCCTCGTCCCGCACCTGGCCTACCTCGCCCAGCGCAACAACCAGCGGATCTTCCAGCACCTCACGGTGCCGCAGATCGTCGCCCTGGTCCTCGAGGAGCACGGCATCCTCGCCGACGCCTACCGC…	GTGGCTCTCCATCGCCTGGCCTTTATCTTCCTGTGCCTGCCCCTCATGGCCAGCGCCGCCCCCTTCACCTCCCCCGGTGACCGCGACCTGATCCGCGACCGCCAGCAGCGCCTGCTGGACGAACAGCGCAAGCGCCTGGAGGAACTCCAGCAACTGCCCGGCAAGGGAGCGCCCGCCGCTGCGGATGCCTCCGGCGACGACGAGCGCTGCTTCGAGATCCGCCGCATCGAGCTGGAAGGCGCCGGGCACCTCGGCGAAAGCGCGCGTCGCCAACTGCTGGCGCCCTACCAGGGGCGCTGCCTGGGCGTCGGCCAGCTCAATGCGCTGCTCAAGGCCGTCACCGACCATTACCTGGATCGCGGCTACGTCACCACCCGCGCCTACCTGCCACAGCAGGAT…	ATGGGTGACCGGCACGACTACGTCGCTCTGGAATGGGTGAAAGGCGAGATCGCCGAAACCCTGAAACAGGCGCGCCAGGCGCTGGAAGCGTTCGTCGAGAACCCGCAGGACCCGACCCGCATGCGGTTCTGCCTGACCTACGTGCACCA---GGTGCAGGGCACCCTGCAGATGGTCGAGTTCTACGGCGCGGCCCTGCTCGCCGAGGAAATGGAGCAGTTGGTCCAGGCCTTGCTGGACGGTCGCGTGCCGAACCAGGGCGAGGCCCTGGAAGTGCTGATGCAGGCGATCCTGCAACTGCCGGTCTACCTCGACCGGATCCAGACCGCCCGGCGCGACCTGCCGATGGTGGTCCTGCCGCTGCTCAACGACCTGCGCGCCGCGCGCGGCGAGAAGCTG…
29	ATGACCTTCGACGCCGCGTTCCAGCGGCTCGGCGAGCGGATGGCCGGCGGGGCCCTGGCGGAAACGGCGCTGGCGCCGTTCACCCATCTGCTGATCGACGAGTTCCAGGATGTCTCGCCGCAGATCGTCCTCTGGCTACAGGCGTTGCACCGCCGCCTGGCGACGACCCAGGGCACCGCGCCGAGCCTGATGGCCATCGGCGACGACTGGCAGTCGATCTACGGCTGGCGCGGCAGTTCGCCGGAGCTGTTCATCGACTTCGACCGGCACTTCCCCTCGCGTGGGCGGGGACGCAAGAGCGCGCTGCTGGTGCTGGAAACCAACTACCGCTCCGTCGAACCGATCATTCGCGACGGCGAGAAGGTGCTGGCCGGGGTGCGTTTCAAGCAGGACAAGACC…	ATGCACCTGTTGCGCACCCAACCTGGCGGCTTCGTTCCCGACGACGGCATCGCCCACCTGGCCCAGACTCCCGCCGAGCTGGTGATCCTCTGCAGCGGCGATTCGCACCTGGCATTGCTGGCCGAGGCCGCCCGTGCGCTGCCGGACGACTACCCGAGCCTGCGCCTGGCCAACCCCATGCAGTTGCAGAACCACGCCTCGGTGGACCTCTACGTCGAGGAAGTGCTGCGGCACGCACGGGTGATCCTGCTTTCGCTGCACGGCGGCATCGGCTACTGGCGCTACGGCGTGGAGCAACTGGTGGCGCTGGCCGAGCGCGGCGCGCTGCTGATCCCGGTGCCCGGCGACGACCGCCCCGACCCGGAGCTGAGCGCCCTCGGCAACCTGCCGGCGGAGCAG…	ATGTTCGAACGCATCATCCAATTCGCCATCGAGCAACGCTGGCTGGTCCTGCTGGCGGTGCTGGGGATGGCCGGGGTCGGCATCGGCAGCTACCAGAAGCTGTCCATCGACGCGGTCCCGGACATCACCAACGTCCAGGTGCAGATCAATACCGCCGCCCCCGGCTACTCGCCGCTGGAAGTGGAGCAGCGGATCACCTACCCGGTGGAGACCGTCATGGCCGGCCTGCCGGGTTTGCAGGAAACCCGTTCGCTGTCGCGGCCGGGGATTTCCCAGGTGACGGTGATCTTCGAGGAGGGCACCGACATCTACTTCGCCCGCCAGCAGGTCAACGAACGCCTGAGCACGGCGCGCGAGCAACTGCCGGAAGACATCTCGCCGACCCTCGGGCCGATCTCC…	ATGTCCTTCAACCTTTCCGCCTGGGCGTTGCAGAATCGCCAGATCGTCCTGTACCTGATGATCCTGCTTGGCGCGGTTGGCGCGCTGTCCTACAGCAAGCTGGGGCAGAGCGAAGACCCGCCGTTCACCTTCAAGGCCATGGTGGTGCAGACCAACTGGCCGGGTGCCAGCGCCGAAGAGGTGGCCCGGCAGGTCACCGAGCGTATCGAGAAGAAGCTGATGGAAACCGGCGACTACGATCGCATCGTGTCCTTCTCCCGCCCCGGCGTCTCGCAGGTGACCTTCATGGCCCGCGAGGACATCCATTCCAGCGAGATCCCCGAACTCTGGTACCAGATCCGCAAGAAGATCAGCGACATTCGCGCCACCTTGCCGCAAAGCATCCAGGGCCCGTTCTTC…	ATGCGCACCGAGCAACCGAAAGTCATCCACCTCAAGGACTATCAGGCGCCGGACTACCTGATCGACGAGACCCACCTGAAGTTCGAACTGTTCGAAGACCACAGCCTGGTACACGCCGAGTTGAAGCTGCGGCGCAACCCCGAGCGCGGCGCCGGCCTGCCGCCGCTGTTGCTGCATGGCCAGCAACTGGAGCTGCTGGCGCTCGAACTGGACGGCCAGGCGCTCGGCGCGGACGACTACCAACTGGACGACGAGCAGCTCGGGGTGCAACCGCGGCAGGCCGAATTCGTCCTCAGGAGCACGGTGCGTATCCATCCGGAGAGCAACACCGCGCTGGAAGGCCTGTACAAGTCCGGCAAGATGTTCTGCACCCAGTGCGAGGCCGAGGGTTTCCGCAAG…	ATGACCGATAACCTGAACCTCGGCGCCATCGACCTGGGCACCGACGACGAATTCATCGCCCGCCATATCGGCCCGCGTGCCGCCGACACCCAGGCCATGCTCCAGCGCCTGGGCTACGACTCGCTGGACGCGCTGATCGGCAACGTGATCCCCGACAGCATCAAGGGCAGCAGCGTGCTCGACCTGCCGGCCGGCATGGGCGAGGCCGAGGCGCTGGCCAGCCTGAAGGCGATCGCCGCGCGCAATCGCGCGTTGCGTTCCTTCATCGGCCAGGGCTACTACAACTGCCACACCCCGGCACCGATCCTGCGCAACCTCCTGGAGAACCCGGCCTGGTACACCGCCTACACGCCGTACCAGCCGGAAATCTCCCAGGGCCGCCTGGAGGCGCTGCTGAAC…	GCAGGTTTCCCATGACGAGCTGGTCGCTCGCCTGTCCATGGTCGGCCTCGAGGTCGACGCCGACCTGCCGGTCGCCGGCGCCTTCAGCGGCGTGGTGGTCGGCGAGGTGCTCTCGACCGAACAGCATCCGGACGCCGACAAGCTGCGCGTCTGCCAGGTCAGCAACGGCAGCGAGACCTTCCAGGTCGTCTGCGGCGCGCCCAACGTGCGCGCGGGCCTGAAGATTCCCTTCGCCATGATCGGCGCCGAACTGCCGGGCGACTTCAAGATCAAGAAAGCCAAGCTGCGTGGCGTCGAGTCCTTCGGCATGCTCTGCTCGGCCAAGGAATTGCAGATCAGCGAAGAGAACGCCGGTCTGCTCGAGCTGCCGGCCGACGCGCCGGTCGGCCAGGACGTCCG…	ATGAGCGAGAACAACACGTACGACTCTTCCAGCATCAAGGTGCTGAAGGGGCTGGATGCCGTACGCAAGCGCCCCGGCATGTACATCGGCGACACCGACGATGGCACCGGTCTGCACCACATGGTGTTCGAGGTGGTGGATAACTCCATCGACGAAGCGCTGGCCGGTTACTGCAGCGAAATCAGCATCACCATCCATACGGATGAGTCGATCACTGTCCGCGACAATGGACGCGGTATTCCGGTGGATATCCACAAGGAAGAAGGGGTTTCTGCGGCGGAAGTGATCATGACCGTCCTCCACGCCGGCGGCAAGTTCGACGACAACACCTACAAGGTGTCCGGCGGCTTGCACGGTGTGGGCGTCTCGGTGGTGAACGCGCTGTCCCATGAACTGCGC…	ATGCTGATCCTGCGCGGCGCTCCCGCCCTTTCCGCTTTCCGCCACGGCAAACTGCTCGAGCAACTGACCCAGCACGTACCTGCCGTTACCGGGCTGTACGCTGAGTTCGCGCATTTCGCCGACGTCACCGGCGCGCTCACCGCCGACGAGGAGCAGGTGCTGGCGCGGCTGCTGAAATACGGCCCGAGCGTGCCGGTGCAGGAGCCCAGCGGACGGCTGTTCCTGGTGGTGCCGCGCTTCGGCACCATCTCGCCGTGGTCGAGCAAGGCCTCCGACATCGCCCGCAACTGCGGCCTGGCGAAGATCGACCGGCTGGAGCGCGGCATTGCCTACTATGTGCAGGGCGAACTGTCCGAGAGCGACGCCCAGCAGGTCGCCGCCCGCCTGCATGACCGCATG…	ATGAGTGGCCGCTCCGCTGGTTTCGCCCTGCCCAGCCGCGACGAGTGGCGGCGCGCGCTGGCCGAGTGGGCGCGCAGCGACGGGGCGACCTGGATCTACGTGTTCAAGGTGCTCTGCGCGGCCTTCCTGACCCTCTGGCTGGCGATGCGCCTGGAATTGCCGCAGCCGAGCACGGCGACCATCACCGTGTTCATCGTCATGCAGCCGCAGAGCGGCCAGGTGTTCGCCAAGAGCTTCTACCGCATCCTCGGCACCCTGGTCGGCCTCAGCGTGATGGTCACCCTGATCGCCCTGTTCGCCCAGGAGCGAGTGCTGTTCCTGCTCAGCTCGGCGATCTGGATCGGCCTCTGCACCGCCGGGGCCGCCCGCTACCTTGACTTCCGCTCCTACGCCTGCGTG…	ATGAGCGAATCCCTCGATCTGAGCCTGGAAGGGGTCGAACGCCGGTCGTTGGCCGAGTTCACCGAGCAGGCCTATCTGAATTATTCCATGTACGTGATCATGGACCGCGCCCTGCCGCATATCGGCGACGGCCTGAAACCGGTGCAGCGACGCATCGTCTACGCCATGAGCGAACTGGGGCTGGATGCCGATTCCAAGCACAAGAAGTCGGCGCGCACCGTCGGCGACGTGCTCGGCAAGTTCCACCCGCACGGCGACTTGGCCTGCTACGAGGCCATGGTGCTGATGGCGCAGCCGTTCTCCTATCGCTATCCGCTGGTGGACGGCCAGGGCAACTGGGGGGCGCCGGACGATCCCAAGTCCTTCGCCGCCATGCGTTATACCGAGGCGCGCCTGTCG…	ATGTCTTCACGCAAGATCGGGCTCAACCTGGTGGTCATCGTCGCCCTGGCCGCCCTCTTCACCGGCATCTGGGCCCTGTACAACCGTCCGGTCAGCGTACCGGACTGGCCGGAACGCATCTCCGGCTTCTCCTTCTCGCCGTTCCGCCTCAACCAGAATCCGCAGAGCGGCCGCTACCCCAGCGCCGAACAGATGCGCGCCGACCTGGAACTGGTCGCCCGGCACACCCACAGCATCCGCACCTATTCGGTCCAGGGCGCGCTCGGCGACATCCCGGCGCTGGCCGAGGCGTTCGGCCTGCGCGTCAGCCTGGGCATCTGGCTCGGCCCGGACCTGGCCGGCAACGAGGCCGAGATCGCCCGCGCCATCCGCATCGCCAACGAGTCGCCGAGCGTGGTG…	ATGACCGCCATGCCCGAAGTACTTCGCGAAGATACGCTGAACATCCCCGACAGCCGTGGGCTGAATCTCTACACCTGCGATCCGGCCCTGGAGCGGCTGCTGGAGGTATACCTGCCGCCGGCGTTGCTCGCCGAATGGCGGCCGCTCCTCGAACGGCTCGGCGCCCGTGCCGGCGGCGAGCTGGACGTGCTGGCGCTGGCGGCGGACAAGAATCCGCCGGTGCTGGCGCCGCGCACCCGCCGCGGCGAGGATTTGCAGAGCATTCGCAAGCATCCGGACTACGTCGCCCTCGAACAGGTGGCCTATGCCGAACTTGGCCTGGCTTCCATGAGCCATCGCCCGGACGGCCCGCCGCCGCTGGTGAAGTATGCGCTCACCCACCTGTTCGTACAGGCCGAG…	ATGTCCGAATTCTTCATCAAGCGGCCGAACTTCGCCTGGGTGGTGGCCCTGTTCATCTCCCTGGCCGGCCTGCTGGTCATTTCCAAATTGCCGGTAGCGCAGTACCCCAATGTCGCGCCGCCACAGATCACCATCACCGCCACCTATCCCGGCGCCTCGGCGAAGGTGCTGGTGGACTCCGTCACCAGTGTGCTTGAGGAGTCGCTGAACGGCGCCAAGGGCCTGCTCTACTTCGAGTCGACCAACAACTCCAACGGCACCGCCGAGATCGTCGTCACCTTCGAGCCGGGCACCGATCCGGACCTGGCCCAGGTGGACGTGCAGAACCGCCTGAAGAAAGCCGAGGCGCGCATGCCGCAGGCGGTGCTGACCCAGGGCCTGCAGGTCGAGCAGACCAGC…	ATGAGCCAGCAGCAGATGCCCGTGGCCCTCGATCCGCTGGATTTCCCGTTGCACGGCAGCCGCCTGATCGAGGCCAGCGCCGGTACCGGCAAGACGTTCACCATCGCCCTGCTATACGTACGCCTGGTCCTCGACCATGGCGGCGAGAGCGCTTTCGGCCGGCCGCTGAGCCCGCCGGAAATCCTCGTGGTGACCTTCACCGATGCGGCGACCCAGGAACTCCGCGAGCGTATCCGCAGCCGCCTGGGCGAAGCGGCGCGTTGTTTCGCCGAGCCGCAGGAGCGCCACGACGGCCTGCTGGTCGCGTTGCGCCAGCAGTATCCCACCGAGCGCTGGCCGGGCTGCGCGCGCCTGCTGCGCCTGGCCGCGGAGTGGATGGACGAGGCCGCGGTATCGACC…	ATGAGGCGCGCCAGCCTGCATATGTTGCTCTGCCAGTTCGCCATGGCCCTGGGCCTGCTCCTGAGCCTGGGCAGCGAGGCCTGGGCCGCCAGGCCGGCTCCGCAGGCGGCCGTCGACCTGGAAGCGCCGCCCGCCCTGGCCGAGGACGCCAGCCTCGACCAGCTCAACGCGCAACTCGACCTGATCCGCCAGCGCGTTACCGCCGACGCCAGCGACGACCTCCTCGCCGAGTTGCGCCAGAGCGCGCTGCAAGTCCAGCGCCAGGCCGACGCCCTACTCGCGCTGCGGGTGGCCGACATCGAGCGGCTCGACGATCAGTTGAAAGTGATCGGCCCGCCGCAGCCCGACGAGGCGGAAAGCCTCGCCGCCCAGCGCCAGGCCCTGACCCGGCAGAAGAAC…	CTGCTGTTCGCCGCAGTGGTCATCGGCTTCCCCCAGCGCGCCGGCGAATGGCTGCTGGCCGCGCAGACCTGGGCCTCGCAGACCGTCGGCTGGTACTACCTGCTGGCGATGACGCTGTACCTGATCTTCGTGGTGGTCACCGCGCTTTCCGGCTACGGCAAGATCAAGCTCGGTGCCGACCACGACGAGCCGGAATTCAGCTACCTGTCCTGGGCCGGCATGCTGTTCGCCGCCGGCATCAGCATCACCCTGTTCTTCTTCTGCGTATCCGAACCGCTGACCCACTTCCTCCAGCCGCCGCAAGGCGAGGCCGGTACCCAGGAAGCCGCGCGGCAGGCCATGGAACTGCTGTTCCTGCACTGGGGCCTGCACGGCTGGGGCGTATTCGCCCTGGTGGCG…	ATGGTCCAGGGCACCACCTCGGACGCCGGCAAGAGCACCCTGGTGACCGCGCTGTGCCGCTGGCTGGCCCGGCGCGGCGTCGCGGTGGTGCCGTTCAAGCCGCAGAACATGGCGCTGAACAGCGCGGTCACCGCCGACGGCGGCGAGATCGGCCGCGCCCAGGCGGTCCAGGCCCAGGCCTGTCGGCTGGCGCCGCACACCGACATGAACCCGGTGCTGCTCAAGCCGAACACCGACATCGGCGCCCAGGTGATCATCCATGGCCGCGCGGTGACCAGCATGGACGCCGCCGCCTACCACGACTACAAGCGCGTGGCGATGGAAGCGGTGCTGGCTTCCCATGGGCGGCTCGCCGCCGCCTACCGGGTGGTGATGGTGGAGGGCGCCGGCTCGCCGGCG…	ATGGCCAGCCTGTTCCTCGGCCGCAAGGAAATCGACGACGACCTGCTCGACGACATCGAGACGCGCCTGCTGACCGCCGACGTCGGCGTCGAGGCCACCACCCTGATCGTGCAGAACCTGACCAAGCGCGTGGCGCGCAAGGAGCTGGCCGACAGCGGCGCGCTGTACAAGGCGCTGCAGGAAGAGCTGGCCAGCCTGCTGCGCCCGGTGGAGCAGCCGTTGCAGGTCGACGTCGCGCGCGAGCCCTATGTGATCCTGGTGGTCGGGGTGAACGGCGTGGGCAAGACCACCACCATCGGCAAGCTGGCGAAGAAGCTGCAACTCGAGGGCAAGAAGGTCATGCTGGCCGCCGGCGACACCTTCCGCGCCGCCGCCGTGGAGCAGTTGCAGGTCTGGGGC…	TTGCGCATCGAGAACTTCGCACCCATCGACAGCCAGGGTTTCCGTTTCCTGCTCCGGCCAGGTGACGAACCTCTGCTCGCGCTCATCGATCGCGCCCTGCCGCATATTAGCGGGCGCTACGGCGACGAACTGTTGCGCAGCTGGAGCGCCGGGCGGCGCCTGCGCTTCGACGAGCCCCGGGTGACGCTGTCGCCGGCGGAGCAGCGTTGGCTCTCCGCGCACCCGGTCGTGCCGGTGGTGATCAACCATTCCCTTGGCGCGCTCGGGCAACTGGATAACGAGGGGAGGCTGAGTGGTATCGGGCGTGACTATCTGGACCTGATCGGCAAGCGCAGTGGCCTGCAGTTTTCCTTCACTGGAGCACGCAACTTCGTCGAGACGAAAAGCCGACTGGATGCG…	CGAGCCACCGCCCGCAGACGACTACTACGAAGTCGACATGGATACCCTGGCCTACCTGGATGCCGCGCCCGAGCCTGACGTGGTCGTGGTGGAGGAGCCGCTGCCGGCGGCGAAGCCGGCCACCGGCCTGGCCGCGGAGTGGCTGGAGCTGTTCCCGCGGCTCGGCCTCGGCGGCCTGACCGCCAGCATCGGTGCCAACTGTACGCTGGTAGCTGCCGACGGCGACCACTGGCATCTGCATCTCGATCCGGGCCAGAGCGCGCTGTTCAACGCCACCCAGCAGCGGCGGCTGAACGATGCGCTGAACCAGCACCTGGGGCGCACCCTCAAACTGGAGGTGACCCTGCAGAAGCCTGAGCAGGAGACCCCGGCCCAGGCAGCGGCACGCCGGCGTGCCGA…	ATGTCGCAGACGCCGTCCCTCGCCCAGCTCCAGCCCGCCGATGCCTTCCTGCGCCGCCACCTCGGCCCCGATCCGGCGGAACAGCAGGCCATGCTGGATTTCCTCGGAGTTTCCACTCGCGCCGAACTGATCGTGCAGACGGTGCCGCCGGCGATCCGCCTCAACCGGCCGCTGGAACTGCCCGCCGCGCTCGACGAACAGGCCGCCCTGGCGCGCCTGCGCGGCTACGCCGGGCTCAACCAGCGCTGGACCAGCCTGATCGGCATGGGCTACTACGGCACCGTGACGCCGCCGGTGATCCTCCGCAACGTGCTGGAGAATCCCGGCTGGTACACCGCCTATACGCCCTACCAGCCGGAAATCGCCCAGGGCCGCCTGGAAGCGCTGCTGAATTTCCAG…	GTGATCCTCGCCGACGAGCAGGAAGAGTTCGGCGGCAGCCTGCTGGACACCCGCGAGACCCTCGACGGCAAGCCCGCCGCCGAGTGGGTCGCGGACGCCGTGGCCGAGCTGCAAGGCCTGCCGGAAGTCATCCTGCTACCGCGCTCCACGGTCAACGGCTACCACGACCACAACTTCCTCACCATCCACGAGCGGCGCACCGACCACCTCGGCGAGGTCGCCCCGCTCGGCCAGGTCCGCCAGCGTGTGCACCGCGTGCGCGCCAAGCGCGTGGTACTGGCCGCCGGCGCCCATGAGCGGCCGCTGGTCTACGGCAACAACGACCTGCCCGGCAACATGCTCGCCGGCGCGGTTTCCACCTATGTACGGCGCTACGGCGTGGCACCGGGCAAGAAACTG…	GTGCGCAGCTATCTCGAATGGCTGCTGGACAACCACTTCACCTTCCTCGGCTACGAGGAATTCAGCGTCGCCGACGAGGCCGACGGCGGGCGCATGGTCTACGACGAGAAATCCTTCCTCGGCCTTACCCGTCTGCTGCGTGCCGGCCTGAGCAAGGATGACCTGCACATCGAGGACTATGCCGTCGCCTACCTGCGCGAACCGGTCCTGCTGTCCTTCGCCAAGGCTGCCCATCCGAGCCGTGTGCACCGCCCGGCCTACCCGGACTACGTGTCGATCCGCGAGCTGGACGGCAAGGGCCGGGTGATCCGCGAGTGCCGCTTCATGGGCCTGTTCACCTCCTCGGTGTACAACGAGAGCGTCAACGACATTCCCTTCATCCGCGGCAAGGTCGCCGAA…	GTGTACGGCGAATATTCTCGGGAAAGCATTGTCTGCCTGCTCGCCATACTATTATCCGGCCATCACTACTTATATATAGACCTGAAACAACCGGCGGCCTGGAATGCAGAGTTGTGCCGGCAGGTCGACTGCCGCCTGATCCTCGACTGCTCGACCACGCCGACGCCCGCCAACGGTCTTCCCTGCGTCCCGGTCAGGCACCTGCCTGCCGCTCCAGCCTCGGTCGCCCGGCCATGCTTCGCGGCGGACCAGATCGCCTACATCAACTTCTCCTCGGGCACCACCGGCCGCCCGAAAGCCATCGCCTGCACCCACGCCGGCATTACCCGTCTGTGCCTGGGCCAGTCGTTCCTCGCGTTCGCTCCGCAGATGCGCTTCCTGGTGAACTCGCCGCTGTCC…	CTGCTGGAAGAAGGTGCGGACGAGGTATTCGAGGAAATCCTCGCCGCCGCTACGTCCTACTTCCAGACGCCCATCGCGCTCATTTCCATCCTCGACCATCAGCGCCAGTGGTTTCGCGCGAGCATCGGCCTCGATATCCGGCAGACGCCGCGACGGGATTCGTTCTGCGCCTATGCGATCCTGGGCAAGGGAGTATTCGAGGTGGCCGACGCCACCCTCGACCCGCGCTTCCGGGACAACCCCTATGTGCAAGGCGAACCGCGCATCCGCTTCTACGCCGGGGCTCCGCTGGCCACCGCGGAAGGTCTCAACCTCGGCAGCCTCTGCGTCATCGACCGGGAACCACGCGGGCCGCTGGCCGAGCGGGACGTCGCCATGCTCGAGCACTTCGCCCGGCTG…	ATGTCCCTGAGTGTCTTCGATCTGTTCAAGATCGGCATCGGGCCGTCCAGCTCCCACACCGTGGGGCCGATGCGTGCCGCCGCGCGCTTCGCCGAGGGGCTGAGGCGCGAGGGGTTGCTGGAGGCCACTGCCAGCGTCAAGGTCGAGCTGTACGGCTCGCTCGGCGCCACCGGCAAGGGCCACGGCAGCGACAAGGCGGTACTGCTCGGCCTGGAGGGCGAGCAGCCGGACACGGTGGATACCGCCGCGATTCCCGCTCGGCTCGATGCCATCCGTTCCAGCGGCGAGCTGCGCCTGCTCGGCGAGCGGCCGATCCGCTTCGTCGAGAAGGAACACCTTGCGCTGATCCGCAAGCCGCTGGCCTACCATCCCAACGGCATGATCTTCCGTGCCTTCGAC…	ATGAACAGAGTTTTCCTGACCCCGGCAGCCGTGGCGCTGTGCGGCGCGTCTTCCCTGAGCCTGGCCGAACCGGTCAGCCTTGCCGACCAGGTGGTGACCGCCACCCGTACCGCCCAGACCGCTTCCCAGAGCCTGGCGGCGGTGAGCGTCATCGACCGCGAGGATATCGAGCGCAGCCAGGCGCGCAGCGTGCCGGAGCTGTTGCGCCAGGTACCCGGCGTGTCGCTGGCGAACAACGGCGGTTTCGGCAAGAACACCACGCTGTTCCTGCGCGGCACCGAGTCCGACCATGTGCTGGTGCTGATCGACGGCATCAAGGTCGGCTCGGCCAGCGCTGGCCTCACCGCGTTCCAGGACTTGCCGGTGGAGCTGATCGAGCGCATCGAGGTGGTCCGCGGG…	GTGCGGGTGCTCAACTGGAGCTGGGGCATCCACCGCGTCGGCGCTCGCGACGTCGATGGCGACGAGGTGGATTCGCTGGTGCGCTCGGGGATCGCCATGAGCGGCTACGAGGAGTTGCTCGAGGAGTTCTTCCTCTGGCTGCGCAAGGAGCATCCGGACGTGCTGGTGGTCAACTCCGCCGGCAACGGCTCGTCCTACTCCGGTACCGACGAATACCGCCTGCCGTCCTCCTTCGTTACCGAGCAGTTGCTGGTGGTGGGCGGCCACCAGCGCAGCGAGCGCCAAGGCCTGGCGGTGGACGACCCGGCCTACGCGGTCAAGCGCAGCACCTCGAACGTCGACATGCGGGTGGATGTCACCGCCGCCGCCTGTACCCATGCCTCGACCCTGGAGCGGGAC…	TTGCAGGCAGCTTGCGCGTTCGGCCCGCCCGGGCGGCTATTCCGCGCCTGCGACGAGCAAGGACGCGAGGCGTTGCTGCTGCTCGCGGCGGTCGATGCCGACGAAGCGTTCTGGCAGCGCGAATGGGCATTGCGGCGCTGCCGTGCGGAGAGCCTGCCGCGAGTATTGTCGTCGCCCCGGTTGCGTCGTCATGCCTTCCAGTTGTTCGCTCCGCCGCGCTGGCCGATGCGCAGCCTGCTGGATTGGGCGCCAGCGCACCTGCCGCTGGAACCGCAATGCGCGCTGGTCCTCCTGGAGCAACTTATCGATGCGGTTCGCGCCTTGCAGCGGCGCGGCGTACAGGGCTTGTGGCTGGCGCCGCGGCAGATCCTGCTGGACGAGGGCGGGCGCCTGCTGTTC…	ATGTTCAACCCGGCCAACCAGACCCACTTCAGCCTCACCCTCGACGGCCTCCGCCACGACCTGCAGGTCCTCGCCTTCAACGGCCACGAAGGCATCAGTCGCCCCTACCGTTTCGAACTCGAACTGGTCGGAGAGCGCGCCGGCCTCGACCTCGAAACGTTCCTCCACCGGCCCGCCTTCCTCGCCTTCACCCCGCAGGGCCAGGGTGTCCACGGCCTGGTCTACGGCGCTGCCCAGGGCGATGCCGGCAAGCGCCTGACCTGCTATCGCCTCACCCTCGTCCCGCACCTGGCCTACCTCGCCCAGCGCAACAACCAGCGGATCTTCCAGCACCTCACGGTGCCGCAGATCGTCGCCCTGGTCCTCGAGGAGCACGGCATCCTCGCCGACGCCTACCGC…	GTGGCTCTCCATCGCCTGGCCTTTATCTTCCTGTGCCTGCCGCTCATGGCCAGCGCCGCCCCCTTCACCTCCCCCGGCGACCGCGACCTGATCCGCGACCGCCAGCAGCGCCTGCTGGACGAACAGCGCAAGCGCCTGGAGGAACTCCAGCAACTGCCCGGCAAGGGAGCGCCCGCCGCTGCGGATGCCTCCGGCGACGACGAGCGCTGCTTCGAGATCCGCCGCATCGAGCTGGAGGGCGCCGGGCACCTCGGCGAAAGCGCGCGTCGCCAACTGCTGGCGCCCTACCAGGGGCGCTGCCTGGGCGTCGGCCAGCTCAATGCGCTGCTCAAGGCCGTCACCGACCATTACCTGGATCGCGGCTACGTCACCACCCGCGCCTACCTGCCACAGCAGGAC…	ATGGGTGACCGGCACGACTACGTCGCTCTGGAATGGGTGAAAGGCGAGATCGCCGAAACCCTGAAACAGGCGCGCCAGGCGCTGGAAGCGTTCGTCGAGAACCCGCAGGACCCGACCCGCATGCGGTTCTGCCTGACCTACGTGCACCA---GGTGCAGGGCACCCTGCAGATGGTCGAGTTCTACGGCGCGGCCCTGCTCGCCGAGGAAATGGAGCAGTTGGTCCAGGCCTTGCTGGACGGTCGCGTGCCGAACCAGGGCGAGGCCCTGGAAGTGCTGATGCAGGCGATCCTGCAACTGCCGGTCTACCTCGACCGGATCCAGACCGCCCGGCGCGACCTGCCGATGGTGGTCCTGCCGCTGCTCAACGACCTGCGCGCCGCGCGCGGCGAGAAGCTG…
[truncated: 15 more rows]

## Sheet: Allele Sequences S. maltophilia
# Profile per Allele	bglX_1	motB_1	fabD_1	gcvA_1	htpG_2	moxC	hisB	cheA_1	proP_2	bglB	yvoA	mepM_3	queG	lptE	czcR	qseC_6	nagA_1	sbnA	ribA	tamA	mnmE	glnG	macB_1	fadH	murR	pepA_2	xerD	ubiH_1	mutS	cca	folK_2	hemC	htrB_2	nagK_2	csbC	glyS	tycC-1	tycC-2	ynfM_2
[truncated: 22 more rows]
